# Supplementary material for: Domestication over Speciation in Allopolyploid Cotton Species: A Stronger Transcriptomic Pull
Source: MDPI journal article supplement (doi:10.3390/genes14061301), 2023-06-20
Supplement: s1 [file s1]

Supplementary Figure S1. PCA of expression data for all samples (A) and for only *G. barbadense* (B). Colors reflect DPA, shapes reflect condition (i.e., wild or domesticated), and AD1/AD2 references to *G. hirsutum* (AD1) and *G. barbadense* (AD2), respectively.

Supplementary Figure S2. UpSet plots comparing DGE overlaps in wild and domesticated accessions between *G. hirsutum* (AD1) and *G. barbadense* (AD2) for 5 DPA (a), 10 DPA (b), 15 DPA (c), and 20 DPA (d).

Supplementary Figure S3. Eigengene expression values for ME4 and ME5 for the *G. hirsutum* (AD1) and *G. barbadense* (AD2) wild (w) and domesticated (d) networks. Colors correspond to DPA, which are ordered from left-to-right as 5 DPA (red), 10 DPA (green), 15 DPA (blue), and 20 DPA (purple).
