# Supplementary material for: Domestication over Speciation in Allopolyploid Cotton Species: A Stronger Transcriptomic Pull
Source: Genes (Basel). 2023 Jun 20;14(6):1301. doi: 10.3390/genes14061301 (PMC10298526; doi:10.3390/genes14061301)
Supplement: Supplementary file 1 [file genes-14-01301-s001.zip]

Archive with 15 entries (15 files):
- Supplementary Figure Legends.pdf
- Supplementary Figure S1.jpg
- Supplementary Figure S2.jpg
- Supplementary Figure S3.jpg
- Supplementary Table S1.xlsx
- Supplementary Table S10.xlsx
- Supplementary Table S11.xlsx
- Supplementary Table S12.xlsx
- Supplementary Table S2.xlsx
- Supplementary Table S3.xlsx
- Supplementary Table S4.xlsx
- Supplementary Table S6.xlsx
- Supplementary Table S7.xlsx
- Supplementary Table S8.xlsx
- Supplementary Table S9.xlsx
