# Supplementary material for: Domestication over Speciation in Allopolyploid Cotton Species: A Stronger Transcriptomic Pull
Source: Genes (Basel). 2023 Jun 20;14(6):1301. doi: 10.3390/genes14061301 (PMC10298526; doi:10.3390/genes14061301)
Supplement: Supplementary file 1 [file genes-14-01301-s001.zip › Supplementary Table S1.xlsx]

## Sheet: diploid combined
Supplementary Table S1. Samples sequenced in the present study for Gossypium hirsutum (AD1) and G. barbadense (AD2). Sample names are given in the first column, followed by information regarding the sample in the next 5 samples. Time points are given in days post anthesis (DPA). Samples taken from the SRA are noted under the "Note" column. Rows are colored by DPA for ease of viewing. Reasons for …
Name	Species	Accession	Status	Plant	Timepoint	Note	Number Pairs	Surviving Pairs	Drop Rate	Mapped (A2D5/AtDt/At2Dt2)	Mapping Rate (A2D5/AtDt/At2Dt2)
AD1-CRB252_JG_05DPA	AD1	CRB252	domesticated	JG	05DPA	SRR8837948	55901222	55097646	0.014	49509531	0.898578
AD1-Maxxa_JG_05DPA	AD1	Maxxa	domesticated	JG	05DPA	SRR8837952	44718091	44035709	0.015	40429632	0.91811
AD1-TM1_JG_05DPA	AD1	TM1	domesticated	JG	05DPA	SRR8837956	38014167	37529713	0.013	34083897	0.908184
AD1-CRB252_JG_10DPA	AD1	CRB252	domesticated	JG	10DPA	SRR8837949	29258894	28795653	0.016	26053781	0.904782
AD1-Maxxa_JG_10DPA	AD1	Maxxa	domesticated	JG	10DPA	SRR8837953	29367962	28895164	0.016	25663060	0.888144
AD1-TM1_plantS1_10DPA	AD1	TM1	domesticated	plantS1	10DPA		21233852	21106999	0.006	17426535	0.825628
AD1_TM1_purdue14_10DPA	AD1	TM1	domesticated	purdue14	10DPA		60695717	59695753	0.0165	44112646	0.738958
AD1_TM1_purdue3_10DPA	AD1	TM1	domesticated	purdue3	10DPA		58292573	57520375	0.0132	43567600	0.757429
AD1_TM1_purdue4_10DPA	AD1	TM1	domesticated	purdue4	10DPA		48428121	47863783	0.0117	34833237	0.727758
AD1-CRB252_JG_15DPA	AD1	CRB252	domesticated	JG	15DPA	SRR8837950	33262075	32722485	0.016	29550136	0.903053
AD1-Maxxa_JG_15DPA	AD1	Maxxa	domesticated	JG	15DPA	SRR8837954	31686165	31033622	0.021	24080919	0.775962
AD1-TM1_JG_15DPA	AD1	TM1	domesticated	JG	15DPA	SRR8837962	29554346	29075388	0.016	25954338	0.892657
AD1_TM1_purdue13_15DPA	AD1	TM1	domesticated	purdue13	15DPA		65635062	61601515	0.0615	52933832	0.859294
AD1_TM1_purdue3_15DPA	AD1	TM1	domesticated	purdue3	15DPA		52202871	51173939	0.0197	39076343	0.763598
AD1_TM1_purdue6_15DPA	AD1	TM1	domesticated	purdue6	15DPA		50979941	50098199	0.0173	35866857	0.715931
AD1-CRB252_JG_20DPA	AD1	CRB252	domesticated	JG	20DPA	SRR8837951	34011731	33425827	0.017	29777218	0.890845
AD1-TM1_JG_20DPA	AD1	TM1	domesticated	JG	20DPA	SRR8837963	29510081	28952895	0.019	25940859	0.895968
AD1_TM1_purdue1_20DPA	AD1	TM1	domesticated	purdue1	20DPA		55935578	54662128	0.0228	38712556	0.708215
AD1_TM1_purdue6_20DPA	AD1	TM1	domesticated	purdue6	20DPA		52686182	51704930	0.0186	43446953	0.840286
AD1-TX2095_JG_05DPA	AD1	TX2095	wild	JG	05DPA	SRR8837964	31797359	31259557	0.017	26549373	0.84932
AD1-TX665_JG_05DPA	AD1	TX665	wild	JG	05DPA	SRR8837960	29684989	29052337	0.021	24453912	0.841719
AD1-Yuc_JG_05DPA	AD1	Yuc	wild	JG	05DPA	SRR8837969	27776650	27172195	0.022	22185136	0.816465
AD1-TX665_JG_10DPA	AD1	TX665	wild	JG	10DPA	SRR8837961	29511233	28834109	0.023	22817142	0.791325
AD1-TX665_plantA_10DPA	AD1	TX665	wild	plantA	10DPA		22519441	22137787	0.017	14883677	0.67232
AD1-Yuc_plant281_10DPA	AD1	Yuc	wild	plant281	10DPA		21052971	21041887	0	17215010	0.818131
AD1-Yuc_plant7_10DPA	AD1	Yuc	wild	plant7	10DPA		23273900	23264801	0	17337076	0.745206
AD1-TX665_JG_15DPA	AD1	TX665	wild	JG	15DPA	SRR8837966	37612622	36988066	0.017	33549369	0.907032
AD1-TX665_plantA_15DPA_rep1	AD1	TX665	wild	plantA	15DPA	rep1	27838236	27820978	0.001	23367484	0.839923
AD1-TX665_plantA_15DPA_rep2	AD1	TX665	wild	plantA	15DPA	rep2	27505664	27488479	0.001	22737262	0.827156
AD1-TX665_plantB_15DPA	AD1	TX665	wild	plantB	15DPA		38547694	38527687	0	26657169	0.691896
AD1-Yuc_plant281_15DPA	AD1	Yuc	wild	plant281	15DPA		29828922	29809936	0.001	24107996	0.808724
AD1-Yuc_plant6_15DPA	AD1	Yuc	wild	plant6	15DPA		16866138	16687735	0.011	11583228	0.694116
AD1-Yuc_plant7_15DPA_rep1	AD1	Yuc	wild	plant7	15DPA	rep1	19567659	19415050	0.008	12855130	0.662122
AD1-Yuc_plant7_15DPA_rep2	AD1	Yuc	wild	plant7	15DPA	rep2	20497852	20471138	0.001	16426278	0.802412
AD1-TX2095_JG_20DPA	AD1	TX2095	wild	JG	20DPA	SRR8837959	35291246	34572526	0.02	29435336	0.851408
AD1-TX665_JG_20DPA	AD1	TX665	wild	JG	20DPA	SRR8837967	27953610	27423397	0.019	24099156	0.878781
AD1-TX665_plantA_20DPA	AD1	TX665	wild	plantA	20DPA		16203896	15766929	0.027	12375039	0.784873
AD1-TX665_plantB_20DPA	AD1	TX665	wild	plantB	20DPA		20461720	20447509	0.001	16996185	0.831211
AD1-Yuc_JG_20DPA	AD1	Yuc	wild	JG	20DPA	SRR8837970	38162310	36627487	0.04	23464787	0.640633
AD1-Yuc_plant2_20DPA_new	AD1	Yuc	wild	plant2	20DPA	new	22170255	21960369	0.009	15430224	0.70264
AD1-Yuc_plant281_20DPA	AD1	Yuc	wild	plant281	20DPA		27700290	27678711	0.001	21173183	0.764963
AD1 Rejected due to read depth (< 1M reads)
AD1-Yuc_plant6_05DPA	AD1	Yuc	wild	plant6	05DPA		8166362	3328944	0.592	869953	0.26133
AD1-TX2095_plantS2_25DPA	AD1	TX2095	wild	plantS2	25DPA		3994464	3646164	0.087	104683	0.0287104
AD1-TX2095_plantS3_25DPA	AD1	TX2095	wild	plantS3	25DPA		2553987	2215574	0.133	914772	0.412883
AD1-Yuc_plant281_25DPA_rep2	AD1	Yuc	wild	plant281	25DPA	rep2	4147946	3586413	0.135	258867	0.0721799
AD1 Removed due to incomplete replication
AD1-Maxxa_plantS2_25DPA	AD1	Maxxa	domesticated	plantS2	25DPA		8881022	1508903	0.83	895712	0.593618
AD1-TM1_plantS3_25DPA_new	AD1	TM1	domesticated	plantS3	25DPA	new	19249289	19098541	0.008	12696356	0.664781
AD1-Tx2095_plantL2_25DPA_new	AD1	Tx2095	wild	plantL2	25DPA	new	23109270	22804105	0.013	16171942	0.709168
AD1-TX665_plantA_25DPA	AD1	TX665	wild	plantA	25DPA		2763185	2400168	0.131	1142476	0.475998
AD1-TX665_plantB_25DPA	AD1	TX665	wild	plantB	25DPA		13029392	12808418	0.017	10308913	0.804855
AD1-TX665_plantC_25DPA	AD1	TX665	wild	plantC	25DPA		18080346	17520743	0.031	10504560	0.59955
AD1-Yuc_plant281_25DPA_rep1	AD1	Yuc	wild	plant281	25DPA	rep1	13810188	13223461	0.043	9791391	0.740456
AD1 Removed due to weird placement
AD1-TM1_JG_10DPA	AD1	TM1	domesticated	JG	10DPA	SRR8837957	20985382	20687889	0.014	18632470	0.900646
AD1-TM1_plantS1_15DPA	AD1	TM1	domesticated	plantS1	15DPA		25736955	25710973	0.001	20266652	0.788249
AD1-TM1_plantS2_15DPA	AD1	TM1	domesticated	plantS2	15DPA		25135076	25117510	0.001	18396350	0.732411
AD1-Maxxa_JG_20DPA	AD1	Maxxa	domesticated	JG	20DPA	SRR8837955	2769552	2715580	0.02	2318989	0.853957
AD1-Maxxa_plant1NewC_20DPA	AD1	Maxxa	domesticated	plant1NewC	20DPA		20500162	20312177	0.009	17132433	0.843456
AD1-Maxxa_plant5New_20DPA	AD1	Maxxa	domesticated	plant5New	20DPA		29697887	29681086	0.001	23032407	0.775996
AD1-Maxxa_plantC_20DPA_new	AD1	Maxxa	domesticated	plantC	20DPA	new	21894319	21757455	0.006	17719279	0.8144
AD1-Maxxa_plantS2_20DPA_new	AD1	Maxxa	domesticated	plantS2	20DPA	new	11823120	10585719	0.105	4652660	0.439522
AD1-TM1_plantS1_20DPA	AD1	TM1	domesticated	plantS1	20DPA		22552036	22459269	0.004	19475154	0.867132
AD1-TM1_plantS3_20DPA	AD1	TM1	domesticated	plantS3	20DPA		22519049	22490911	0.001	19399958	0.862569
AD1-TX665_plantC_05DPA	AD1	TX665	wild	plantC	05DPA		25904414	25750390	0.006	16605500	0.644864
AD1-Yuc_plant281_05DPA	AD1	Yuc	wild	plant281	05DPA		13359720	12764070	0.045	10360204	0.811669
AD1-TX2095_JG_10DPA	AD1	TX2095	wild	JG	10DPA	SRR8837965	26439223	26043765	0.015	23343944	0.896335
AD1-TX665_plantB_10DPA	AD1	TX665	wild	plantB	10DPA		18042795	17705559	0.019	11136531	0.628985
AD1-TX665_plantC_10DPA	AD1	TX665	wild	plantC	10DPA		18507700	17286261	0.066	10953977	0.633681
AD1-Yuc_JG_10DPA	AD1	Yuc	wild	JG	10DPA	SRR8837968	29318675	28839796	0.016	25647564	0.889312
AD1-Yuc_plant6_10DPA	AD1	Yuc	wild	plant6	10DPA		8981913	7650130	0.148	4632658	0.605566
AD1-TX2095_JG_15DPA	AD1	TX2095	wild	JG	15DPA	SRR8837958	33681294	33160548	0.016	29108546	0.877807
AD1-TX2095_plantS2_15DPA	AD1	TX2095	wild	plantS2	15DPA		22806025	22794775	0	18499303	0.811559
AD1-TX665_plantC_15DPA	AD1	TX665	wild	plantC	15DPA		19204518	17602318	0.083	9657513	0.54865
AD1-Tx665_plantC_15DPA_new	AD1	Tx665	wild	plantC	15DPA	new	25653234	25430579	0.009	16837714	0.662105
AD1-Yuc_JG_15DPA	AD1	Yuc	wild	JG	15DPA	SRR8837971	26232665	25771220	0.018	22804538	0.884884
AD1-TX2095_plantS2_20DPA	AD1	TX2095	wild	plantS2	20DPA		19751128	18442362	0.066	10500028	0.569343
AD1-Tx2095_plantS3_20DPA	AD1	Tx2095	wild	plantS3	20DPA		21072026	21036332	0.002	17133294	0.814462
AD1-TX665_plantC_20DPA	AD1	TX665	wild	plantC	20DPA		20595128	20385016	0.01	12781848	0.627022
AD1-Yuc_plant2_20DPA	AD1	Yuc	wild	plant2	20DPA		29286255	29236734	0.002	20274352	0.693455
AD1-Yuc_plant6_20DPA	AD1	Yuc	wild	plant6	20DPA		3381828	3237647	0.043	1585988	0.489858
AD1-Yuc_plant7_20DPA	AD1	Yuc	wild	plant7	20DPA		20528327	20433087	0.005	15969394	0.781546
Name	Species	Accession	Status	Plant	Timepoint	Note	Number Pairs	Surviving Pairs	Drop Rate		Mapping Rate (A2D5/AtDt/At2Dt2)
AD2-PS6_plant2_05DPA	AD2	PS6	domesticated	plant2	05DPA		21285690	21264955	0.001	14955927	0.703313
AD2-PS7_plantA_05DPA	AD2	PS7	domesticated	plantA	05DPA		23762116	23748270	0.0006	18486681	0.778443
AD2-PS7_plantD_05DPA	AD2	PS7	domesticated	plantD	05DPA		26327724	26316058	0.0004	22896256	0.870049
AD2-PS6_plant2_10DPA	AD2	PS6	domesticated	plant2	10DPA		13696519	12918932	0.0568	8007015	0.619789
AD2-PS7_plantA_10DPA	AD2	PS7	domesticated	plantA	10DPA		16326949	16121767	0.0126	13612134	0.844333
AD2-PS7_plantB_10DPA	AD2	PS7	domesticated	plantB	10DPA		19455949	19106454	0.018	14695363	0.769131
AD2-PS7_plantC_10DPA	AD2	PS7	domesticated	plantC	10DPA		20373879	20081877	0.0143	16541311	0.823693
AD2-Phy76_plantL3B_15DPA	AD2	Phy76	domesticated	plantL3B	15DPA		27141067	27121798	0.0007	20745603	0.764905
AD2-PS6_plant2_15DPA	AD2	PS6	domesticated	plant2	15DPA		17899914	17787715	0.0063	12773912	0.718131
AD2-PS6_plant8_15DPA	AD2	PS6	domesticated	plant8	15DPA		20225647	20110580	0.0057	12777141	0.635344
AD2-PS7_plantA_15DPA	AD2	PS7	domesticated	plantA	15DPA		20655784	20438773	0.0105	14038333	0.686848
AD2-PS7_plantB_15DPA	AD2	PS7	domesticated	plantB	15DPA		23585232	23340420	0.0104	15271830	0.654308
AD2-PS7_plantC_15DPA	AD2	PS7	domesticated	plantC	15DPA		15936101	14390585	0.097	10665781	0.741164
AD2-PS7_plantD_15DPA	AD2	PS7	domesticated	plantD	15DPA		28114316	27760846	0.0126	16227962	0.584563
AD2-PS6_plant20_20DPA	AD2	PS6	domesticated	plant20	20DPA		24990722	24958873	0.0013	20798975	0.83333
AD2-PS7_plantB_20DPA	AD2	PS7	domesticated	plantB	20DPA		18419108	18170118	0.0135	10804966	0.594656
AD2-PS7_plantC_20DPA	AD2	PS7	domesticated	plantC	20DPA		27837786	27824600	0.0005	19551821	0.702681
AD2-GB0303_plantS2_05DPA	AD2	GB0303	wild	plantS2	05DPA		26089910	26074946	0.0006	17832069	0.683878
AD2-K101_plant1_05DPA	AD2	K101	wild	plant1	05DPA		24635163	24368269	0.0108	21148846	0.867885
AD2-K101_plant70_05DPA	AD2	K101	wild	plant70	05DPA		20723901	20528434	0.0094	16031777	0.780955
AD2-GPS_plantS1_10DPA_new	AD2	GPS	wild	plantS1	10DPA	new	41439785	40631830	0.0195	26371830	0.649044
AD2-K101_plant1_10DPA	AD2	K101	wild	plant1	10DPA		19654979	19305755	0.0178	10637972	0.551026
AD2-K101_plant70_10DPA	AD2	K101	wild	plant70	10DPA		25739601	25715204	0.0009	16508933	0.641991
AD2-GPS_plantS1_15DPA_new	AD2	GPS	wild	plantS1	15DPA	new	25495399	25012841	0.0189	19880051	0.794794
AD2-K101_plant1_15DPA	AD2	K101	wild	plant1	15DPA		23887403	23873070	0.0006	20185099	0.845518
AD2-K101_plant70_15DPA	AD2	K101	wild	plant70	15DPA		30121882	30106866	0.0005	21059439	0.69949
AD2-GB0303_plantS1_20DPA	AD2	GB0303	wild	plantS1	20DPA		3291106	2840294	0.137	1327799	0.467486
AD2-GB0303_plantS2_20DPA	AD2	GB0303	wild	plantS2	20DPA		19794658	19604077	0.0096	12077714	0.616082
AD2-K101_plant70_20DPA	AD2	K101	wild	plant70	20DPA		25102453	23912999	0.0474	14841445	0.620643
Rejected due to read depth (< 1M reads)
AD2-Phy76_plantS1_25DPA	AD2	Phy76	domesticated	plantS1	25DPA		4239245	2277519	0.4628	201672	0.088549
Removal due to incomplete replication
AD2-Phy76_plantS2_25DPA_new	AD2	Phy76	domesticated	plantS2	25DPA	new	29537778	29268433	0.0091	21850693	0.746562
AD2-PS6_plant2_25DPA	AD2	PS6	domesticated	plant2	25DPA		25074544	25059585	0.0006	21684139	0.865303
AD2-PS6_plant8_25DPA_new	AD2	PS6	domesticated	plant8	25DPA	new	30360691	29825566	0.0176	19279170	0.646397
AD2-PS7_plantA_25DPA	AD2	PS7	domesticated	plantA	25DPA		37862891	37839308	0.0006	27982700	0.739514
AD2-GB0303_plantS1_25DPA	AD2	GB0303	wild	plantS1	25DPA		17430884	16261445	0.0671	7848272	0.482631
AD2-GB0303_plantS2_25DPA	AD2	GB0303	wild	plantS2	25DPA		17470548	13106223	0.2498	2276065	0.173663
AD2-GPS_plantS1_25DPA_new	AD2	GPS	wild	plantS1	25DPA	new	22144401	22008498	0.0061	14104767	0.640878
AD2-K101_plant70_25DPA_new	AD2	K101	wild	plant70	25DPA	new	25090021	24895283	0.0078	16015835	0.643328
Rejection due to irregular placement
AD2-Phy76_plantS2_10DPA	AD2	Phy76	domesticated	plantS2	10DPA		22672766	22380637	0.0129	15081993	0.673886
AD2-PS7_plantD_10DPA	AD2	PS7	domesticated	plantD	10DPA		17206064	16855426	0.0204	10436397	0.619171
AD2-GB0303_plantS1_05DPA	AD2	GB0303	wild	plantS1	05DPA		23975465	23589309	0.0161	19611371	0.831367
AD2-GPS_plantS1_05DPA_new	AD2	GPS	wild	plantS1	05DPA	new	10968401	10664751	0.0277	7900700	0.740824
AD2-GB0303_plantS1_10DPA	AD2	GB0303	wild	plantS1	10DPA		19314359	16515086	0.1449	10413339	0.630535
AD2-GB0303_plantS2_10DPA	AD2	GB0303	wild	plantS2	10DPA		12193407	11068325	0.0923	6651173	0.60092
AD2-GB0303_plantS3_10DPA	AD2	GB0303	wild	plantS3	10DPA		27479327	26048740	0.0521	16794258	0.644724
AD2-GB0303_plantS3_15DPA	AD2	GB0303	wild	plantS3	15DPA		23126676	23096672	0.0013	19747059	0.854974
AD2-K101_plantS2_15DPA	AD2	K101	wild	plantS2	15DPA		21085902	21073085	0.0006	17305670	0.821221
