# Supplementary material for: Domestication over Speciation in Allopolyploid Cotton Species: A Stronger Transcriptomic Pull
Source: Genes (Basel). 2023 Jun 20;14(6):1301. doi: 10.3390/genes14061301 (PMC10298526; doi:10.3390/genes14061301)
Supplement: Supplementary file 1 [file genes-14-01301-s001.zip › Supplementary Table S2.xlsx]

## Sheet: JareczekSuppTableXXconvergeDE
Supplementary Table S2. TPM for genes that were differentially expressed between wild and domesticated accessions for both species (i.e., genes consistent with convergent differential expression under domestication). Gene names are given under "target_id" based on the G. raimondii (Paterson et al. 2012) genome, and average TPM is listed for both G. hirsutum (AD1) and G. barbadense (AD2) wild (w) …
target_id	AD1d05	AD1d10	AD1d15	AD1d20	AD1w05	AD1w10	AD1w15	AD1w20	AD2d05	AD2d10	AD2d15	AD2d20	AD2w05	AD2w10	AD2w15	AD2w20	comparison	TAIR10
Gorai.005G151900.1.D	8.39348	2.44532	1.79373	1.47228	2.83592	2.90543	2.54911	1.35239	8.56104	2.61714	1.76912	1.04057	11.6869	0.936872	2.92082	1.78666	dom10v05down	ARF-GAP domain 2
Gorai.005G163600.1.A	7.08433	3.79977	4.83099	6.3773	6.54285	4.48144	5.99463	5.82689	12.2727	6.45053	4.32136	5.56123	8.90605	1.49131	7.58746	3.20239	dom10v05down	quiescin-sulfhydryl oxidase 2
Gorai.006G175100.1.D	11.3861	5.16252	4.47708	2.56668	9.31397	5.89318	5.3753	2.83025	14.9254	7.3102	5.39434	3.49154	13.474	2.30996	8.25343	0.323251	dom10v05down	arginine biosynthesis protein ArgJ family
Gorai.007G343200.1.A	9.4285	4.12662	3.35879	1.64675	9.61613	6.02101	4.23193	1.77382	13.3169	6.87832	2.76267	2.08884	8.84156	1.34549	4.39681	0.612667	dom10v05down	adenosine-5\'-phosphosulfate (APS) kinase 3
Gorai.011G283100.1.D	27.9765	16.0182	16.5584	11.346	21.008	15.3532	15.066	9.20214	31.0898	17.1877	12.9326	11.789	26.5989	5.21983	16.7841	9.65636	dom10v05down	eukaryotic translation initiation factor 2
Gorai.001G133800.1.D	0.291475	1.32354	3.65575	27.8871	19.8508	9.59159	8.11203	27.178	0.660021	5.53418	8.25162	9.35228	0.703181	1.33652	12.3685	12.69	dom10v05up	non-specific phospholipase C2
Gorai.001G148800.1.A	0.722271	1.30582	1.50698	1.9337	0.795307	1.53005	2.30159	1.70161	0.52482	1.94875	0.989656	1.59426	1.92404	0.458833	1.05507	2.88996	dom10v05up	Polyketide cyclase / dehydrase and lipid transport protein
Gorai.001G168000.1.A	2.03887	19.8335	14.6404	24.3914	12.8776	25.9963	19.6005	39.0923	0	2.85309	2.20887	3.01118	2.07028	6.49076	0.92671	4.49493	dom10v05up	NADH dehydrogenase 6
Gorai.001G230300.1.D	53.3256	134.973	193.901	74.5102	63.1397	114.658	136.983	44.3421	3.52225	17.3742	42.6707	69.5685	3.49192	3.95465	57.113	5.46668	dom10v05up	Oxidoreductase, zinc-binding dehydrogenase family protein
Gorai.002G026700.1.D	0.542344	2.16313	1.90196	1.45159	0.18962	0.573714	0.822105	0.698436	0.264214	1.44996	1.27035	1.6342	0.730903	0.0480061	1.01526	0.433339	dom10v05up	Protein kinase superfamily protein
Gorai.002G062100.1.A	39.1006	59.4947	66.6429	65.0503	32.342	34.5125	45.5133	52.0938	20.4419	41.4473	52.6758	60.2958	21.0316	9.41461	56.8149	21.0998	dom10v05up	Class I glutamine amidotransferase-like superfamily protein
Gorai.002G062600.1.A	7.54675	15.1761	26.1397	16.4437	9.00201	13.3953	22.282	18.7293	0.281813	1.22565	0.797549	2.10853	1.30829	0.588492	1.40153	1.25976	dom10v05up	cobalt ion binding
Gorai.002G161400.1.D	11.9192	92.2188	87.7614	32.84	18.7743	56.8541	63.2616	9.24069	0.880862	4.79863	13.2679	16.1332	1.81835	1.62758	12.5013	1.93958	dom10v05up	polygalacturonase 2
Gorai.002G228000.1.A	5.36895	29.658	32.0944	38.615	4.50834	15.6605	24.3328	27.3526	0.785079	5.53721	15.9421	21.631	0.647779	2.25324	33.6961	2.52003	dom10v05up	strictosidine synthase-like 2
Gorai.002G245200.1.D	12.083	24.5114	37.6004	24.218	10.9988	15.5159	21.2128	4.01396	4.49182	15.6891	29.9116	52.011	6.94876	2.47345	21.2399	0.764868	dom10v05up	FKBP-like peptidyl-prolyl cis-trans isomerase family protein
Gorai.002G252300.1.D	107.141	141.196	120.377	59.1904	54.1971	79.9626	83.9578	37.1217	28.7293	80.9219	51.5064	45.5524	39.2611	12.5788	69.0956	14.0988	dom10v05up	glutathione transferase lambda 1
Gorai.002G256200.1.A	0	0.0668359	0.0446234	0.612838	0.0197226	0.202407	0.265444	0.170894	0	0.0550937	0.0166947	0.0529007	0	0.0691302	0.0226351	0.777443	dom10v05up	delta 1-pyrroline-5-carboxylate synthase 2
Gorai.003G030600.1.A	0.0424227	3.89505	4.25691	0	0	0.0890873	0.854244	0.04595	0	4.95099	10.6791	14.6471	0.096256	0.682173	25.0272	2.66418	dom10v05up
Gorai.003G031700.1.A	20.423	25.2035	32.7223	37.6292	17.6923	20.2322	30.3677	34.7426	15.8816	26.3708	19.7787	24.6934	17.7427	6.1805	33.0715	13.9194	dom10v05up	BSD domain-containing protein
Gorai.003G091500.1.A	3.47746	5.05572	5.66555	2.49538	3.12256	5.40882	5.15482	2.10703	2.2565	4.70815	4.23135	4.02498	2.55382	0.850682	6.51254	0.129559	dom10v05up	Integrase-type DNA-binding superfamily protein
Gorai.003G124100.1.A	0.051405	0.38282	1.58002	3.64513	0.113664	0.784111	1.39502	3.42549	0.585044	8.57615	6.23605	0.802443	2.10235	3.80662	6.34553	7.70411	dom10v05up	josephin protein-related
Gorai.003G139300.1.A	10.2661	17.7188	15.8047	3.17908	10.035	18.8715	18.2446	8.09653	3.41665	8.38232	14.2231	10.9013	5.2622	2.04698	16.6901	7.2116	dom10v05up	phototropin 1
Gorai.003G154100.1.A	0.762319	2.50712	0.618766	0.0875466	0.126197	0.532795	0.266032	0.0404142	0.112605	1.04396	1.72301	0.538761	0.161123	0.153878	0.93407	0.0367407	dom10v05up	Subtilisin-like serine endopeptidase family protein
Gorai.004G006400.1.D	0	0.72923	2.12949	3.24671	0.0635433	0.45959	0.565391	0.290508	0	0.101441	0.354317	16.1994	0.264256	0	0.171947	0	dom10v05up	copper transporter 1
Gorai.004G040500.1.D	3.66449	5.04656	8.90927	10.5267	3.80856	4.97255	7.41199	17.9784	2.0768	5.01567	6.06018	11.4003	2.32066	1.16591	10.5583	6.77285	dom10v05up	Plant protein of unknown function (DUF641)
Gorai.004G041600.1.A	10.8162	16.4018	17.9841	22.9158	9.32949	13.6668	19.5412	23.1207	6.27552	11.3049	9.05893	8.85216	10.5084	3.32185	16.7491	6.63257	dom10v05up	Uncharacterized conserved protein (DUF2358)
Gorai.004G062100.1.D	0.168712	1.80528	4.75054	9.65093	0.704953	1.12012	5.27364	0.957863	0.0563054	4.66466	5.56786	20.6562	0.424372	0.111511	5.75133	0.301392	dom10v05up	ethylene-forming enzyme
Gorai.004G206400.1.D	0.0842929	5.80295	6.14103	0.39085	0.89332	2.84703	3.998	0.889703	0	0.591364	1.65959	2.59249	0.105316	0.329778	3.09316	0.91457	dom10v05up	non-yellowing 1
Gorai.004G256300.1.D	3.32758	3.58795	4.68617	8.3285	3.408	4.54588	6.04895	8.21414	3.02798	4.72162	3.59294	4.95816	4.03946	1.65568	5.11974	3.25115	dom10v05up	RNI-like superfamily protein
Gorai.005G089800.1.D	0.138297	2.8066	0.242879	0.058792	0.113419	0.27561	0.00546693	0.246834	0	0.535725	0.682566	0.240974	0	0.164851	0.244476	0	dom10v05up
Gorai.005G109200.1.D	2.50387	4.1906	6.49896	8.20363	2.27249	2.22505	3.92013	6.29529	0.618789	2.39665	3.59384	5.90996	0.600853	0.476262	4.88625	0.461934	dom10v05up	Sec14p-like phosphatidylinositol transfer family protein
Gorai.005G134400.1.D	24.87	45.5661	30.9639	31.4189	29.8879	43.3049	43.8748	34.3849	10.3849	24.0816	30.3118	33.7426	11.9325	5.63632	32.6195	9.94987	dom10v05up	Protein of unknown function (DUF760)
Gorai.005G151100.1.D	0.755177	1.23066	1.09235	4.35572	0.753793	1.33756	1.65768	4.4801	0.348713	1.46303	0.849118	0.870483	0.569659	0.409933	1.72354	1.27045	dom10v05up	phytosulfokin receptor 1
Gorai.005G209900.1.A	0.00472617	0.574046	9.24144	17.9787	0.025363	0.0180519	2.54329	3.80872	0	0.0597987	0.00862227	0.287363	0.0441177	0.0434858	0.773971	0.18501	dom10v05up	Protein of unknown function (DUF604)
Gorai.005G224900.1.A	94.0469	1098.43	1764.56	1560.55	189.769	213.754	302.253	870.124	2.74401	134.878	228.141	220.192	4.43337	22.9372	538.986	35.7619	dom10v05up
Gorai.006G000300.1.A	21.0149	41.5934	54.1638	48.6006	17.5938	27.5307	36.4868	39.4043	8.49314	17.2483	21.1885	27.0413	7.81574	3.96011	30.0857	14.7204	dom10v05up	Glycosyl hydrolase family 38 protein
Gorai.006G008000.1.A	2.40901	3.8368	4.24897	2.08383	5.67538	5.49532	7.33764	2.7134	0.845881	2.27818	2.32968	3.23703	0.950816	0.60887	5.77732	0.573979	dom10v05up	Ca2+ activated outward rectifying K+ channel 6
Gorai.006G017500.1.D	0	0.0356232	1.538	6.96042	0.0122243	0	4.31068	9.51027	0	0.104083	0.0306972	0.966523	0	0	0.0945483	0.75889	dom10v05up	Protein of unknown function (DUF1666)
Gorai.006G068400.1.A	77.7144	557.182	538.432	101.611	69.5963	200.146	264.416	73.6567	0.505389	14.6884	59.4594	80.1079	1.13176	2.87471	116.057	2.18208	dom10v05up	Caleosin-related family protein
Gorai.006G104000.1.D	1.04162	1.6895	1.63836	0.883816	0.991093	1.80093	1.9454	1.21246	0.337913	1.0067	1.0239	1.15525	0.497092	0.288347	1.31322	1.37433	dom10v05up	Ring/U-Box superfamily protein
Gorai.006G125100.1.A	2.65012	6.41624	6.65661	1.91466	2.42469	3.31825	2.75575	0.245022	0.0746445	1.58305	2.87454	2.77823	0.588957	0.322374	2.13847	0.035544	dom10v05up	F-box family protein
Gorai.006G226700.1.D	0.0515041	3.20868	2.78286	0.91236	0.119567	0.660065	0.545172	0.515073	0.422739	4.70551	8.41142	3.38768	0.438163	1.68623	7.97646	0.492262	dom10v05up	NAD(P)-linked oxidoreductase superfamily protein
Gorai.006G241000.1.D	0	0.00357922	0.0373222	19.6419	0	0	0.0198918	15.695	0	0.0406344	0.0204493	0.0270004	0.0652953	0.030829	0.0165954	307.517	dom10v05up	cupin family protein
Gorai.007G013600.1.D	0.975651	3.21369	2.72704	0.509559	0.708914	1.99754	2.29845	0.242082	0.327884	2.00806	3.92899	3.1627	0.303014	0.771682	4.25308	0.324406	dom10v05up	VIRB2-interacting protein 1
Gorai.007G171400.1.D	0.664279	5.70219	4.52765	1.19008	0.782127	1.39676	1.58976	0.250644	0.05404	1.32547	1.94165	2.62048	0	0	0	0	dom10v05up	RNAse II-like 1
Gorai.007G212200.1.D	8.16615	35.6863	28.9747	5.88866	14.1512	19.6322	25.016	11.3712	3.67227	19.2981	18.9	19.0015	4.77911	5.65547	21.2422	2.15025	dom10v05up
Gorai.007G212700.1.D	2.54078	4.25691	6.73703	6.80145	2.54728	4.19867	7.02006	6.31295	2.52276	5.10945	7.06607	14.4044	3.1773	1.15465	12.4961	3.50606	dom10v05up	accelerated cell death 2 (ACD2)
Gorai.007G222800.1.A	0.798652	4.3052	0.93554	0.0579342	1.1605	6.55536	4.52932	0.0327499	0.129459	3.02404	4.41026	2.45502	0.151867	0.688919	3.81336	0.174385	dom10v05up	cyclin d5;1
Gorai.007G323400.1.A	0	0.182498	0.278573	0.0177343	0.00558677	0.0168624	0.0294761	0	0.0105272	2.09505	2.8785	2.5888	0.208747	0.146227	0.354231	0	dom10v05up	Auxin-responsive GH3 family protein
Gorai.008G008400.1.A	1.98148	5.61109	4.97145	4.45468	2.87212	4.8733	4.98531	4.61293	1.04596	3.37192	3.59656	5.34484	1.64784	1.09111	4.16336	4.52228	dom10v05up	B-box type zinc finger protein with CCT domain
Gorai.008G018500.1.A	7.89983	10.3929	13.3142	12.9396	14.6089	22.0821	23.8175	14.8442	4.40677	9.93928	13.1478	14.5975	5.40934	2.28497	18.0934	9.78928	dom10v05up	fatty acid amide hydrolase
Gorai.008G030000.1.D	0.965103	3.75243	0.822792	0.0877388	0.26286	0.495776	0.6699	0.121873	0.0876438	1.27673	0.780284	0.461156	0.108659	0.133082	0.942061	0	dom10v05up	cytochrome BC1 synthesis
Gorai.008G035100.1.D	0.51556	1.21755	0.597271	0.274691	0.139859	0.135423	0.245216	0.082107	0.159849	1.43378	0.282005	0.700657	0.405828	0.0406555	0.31519	0	dom10v05up	armadillo repeat only 1
Gorai.008G051000.1.D	3.60809	6.34624	6.91423	9.63208	3.541	5.03824	7.68435	8.83205	1.91005	4.49191	3.87235	4.69683	2.32011	1.45264	7.7917	3.60989	dom10v05up	UDP-glucosyl transferase 71B5
Gorai.008G089300.1.A	0.645912	5.90505	6.15423	0.72388	0.711049	1.54684	1.48723	0.127298	0.350762	5.67885	14.0104	46.8974	0.568984	1.13636	17.7004	2.98419	dom10v05up	Rhamnogalacturonate lyase family protein
Gorai.008G133200.1.A	0.359531	1.38232	0.78392	0.35629	0.617478	1.30439	0.730991	0.217007	0.0665739	0.91071	1.1428	1.00957	0.0650145	0.179772	0.727125	0.0381657	dom10v05up	Protein of unknown function (DUF3754)
Gorai.008G195500.1.A	15.4663	41.8087	73.4398	60.4686	19.0043	35.5078	51.5747	54.4852	13.9957	40.2632	34.9097	33.229	4.4801	6.16352	48.3515	5.1337	dom10v05up
Gorai.008G202500.1.A	0.0462881	0.352449	0.103856	0.0580795	0.0099064	0.0263577	0.0578594	0.0317241	0	0.29423	0.507029	0.22786	0.0694013	0	1.10052	0.0495993	dom10v05up	cytochrome P450, family 71, subfamily A, polypeptide 25
Gorai.008G220700.1.D	54.3066	90.5503	87.8365	103.678	46.4692	52.9804	72.5769	95.1493	28.3896	66.0439	69.2894	87.533	23.7915	13.0631	106.124	29.6353	dom10v05up	Protein kinase superfamily protein
Gorai.008G248100.1.A	1.63323	3.5255	4.28463	2.81665	1.51128	2.48494	4.00785	2.35078	0.705023	2.28003	1.98867	3.55313	1.1372	0.582953	4.35159	0.693261	dom10v05up	RING/U-box superfamily protein
Gorai.008G282800.1.A	1.12916	4.09542	5.69918	8.60922	0.396329	0.945107	2.07093	5.13309	0.38609	2.03831	3.98457	5.39178	0.407333	0.344989	3.84193	2.0466	dom10v05up	DEAD box RNA helicase (PRH75)
Gorai.009G013400.1.D	12.8343	22.1488	18.1489	16.2704	6.26796	9.17615	9.98314	12.2709	2.61266	6.59872	5.90954	5.90768	3.25736	0.806494	9.20034	2.59611	dom10v05up	S-adenosyl-L-methionine-dependent methyltransferases superfamily protein
Gorai.009G025600.1.A	8.11769	12.2295	9.80458	3.69435	10.5433	13.9979	15.1311	5.24919	2.46346	6.47304	6.21856	5.27408	3.76626	1.78855	13.1678	2.3292	dom10v05up
Gorai.009G035500.1.D	9.56498	142.766	84.9701	8.36492	18.5115	44.0681	41.4036	33.737	0.881729	13.5686	87.2336	44.9194	2.94438	1.89153	103.492	4.3366	dom10v05up	germin 3
Gorai.009G115800.1.A	3.3114	5.18687	3.54899	2.1879	2.6885	3.33072	3.39629	3.45565	1.68879	4.62068	3.9093	4.01512	2.12577	0.846366	3.14094	0.614496	dom10v05up	mannose-1-phosphate guanylyltransferase (GDP)s;GDP-galactose:mannose-1-phosphate guanylyltransferases;GDP-galactose:glucose-1-phosphate guanylyltransferases;GDP-galactose:myoinositol-1-phosphate guanylyltransferases;glucose-1-phosphate guanylyltransferase
Gorai.009G122700.1.A	31.6349	38.7841	33.3533	37.8686	16.6581	19.6874	24.1036	29.4563	8.98733	21.6906	23.395	33.8252	9.21725	5.79487	30.8065	9.8132	dom10v05up	Protein phosphatase 2C family protein
Gorai.009G129500.1.A	3.04717	7.91316	13.8239	12.4338	2.68245	5.71182	9.39129	12.3865	1.65963	5.06818	6.35379	12.8299	1.74906	1.45408	7.29052	2.07321	dom10v05up
Gorai.009G150500.1.D	0.0734214	0.925529	2.40841	3.50202	0.870699	1.50623	3.59293	2.41297	0	0.619416	0.806864	0.964177	0.115573	0.116416	1.10862	2.49478	dom10v05up	O-fucosyltransferase family protein
Gorai.009G158800.1.A	0	1.00712	2.49059	3.91472	0.0552383	0.597243	2.02539	1.91345	0	63.7247	0.339624	0.958525	1.14211	0.194873	0.962225	0	dom10v05up	Protein of unknown function, DUF584
Gorai.009G172400.1.D	42.2313	72.1974	64.8994	47.3939	35.9347	48.9988	57.7437	42.9782	19.3509	38.7466	45.0717	57.0132	16.5152	10.4899	64.1787	19.5036	dom10v05up	oxidoreductase, zinc-binding dehydrogenase family protein
Gorai.009G191200.1.D	0	0.335867	1.9478	4.24685	0.0177195	0.0947038	1.76715	3.23115	0	0.316084	0.627268	1.44351	0	0.0828915	2.16708	0.34307	dom10v05up
Gorai.009G215100.1.A	8.3547	18.0011	24.5193	6.21816	8.36112	13.8291	18.2208	7.23037	2.69926	8.20731	12.5653	9.34454	4.71128	2.69654	14.7354	2.18793	dom10v05up	Serine/threonine-protein kinase WNK (With No Lysine)-related
Gorai.009G215100.1.D	17.624	37.0178	41.5546	5.37335	22.1218	19.0028	14.9085	3.95446	8.92788	30.8725	28.3284	17.516	8.23686	6.85241	33.8259	1.46561	dom10v05up	Serine/threonine-protein kinase WNK (With No Lysine)-related
Gorai.009G236200.1.D	0.8268	7.43069	13.8124	18.1616	1.25846	2.8164	13.4048	18.5028	1.40058	11.7817	23.6957	42.5434	1.85704	2.60199	31.3255	22.8725	dom10v05up	Outer arm dynein light chain 1 protein
Gorai.009G242700.1.A	0.151031	0.867783	3.24158	4.88747	0.208309	1.00908	2.8285	5.74931	0.0254186	1.60282	0.100954	0.0936337	0.109211	0.239973	0.311154	3.01554	dom10v05up	EF hand calcium-binding protein family
Gorai.009G453900.1.A	3.81269	14.3981	13.59	14.9083	6.22031	8.22939	9.63963	12.3286	1.92047	13.654	14.6244	15.8279	0.97394	0.492913	2.54682	1.62747	dom10v05up	amino acid permease 7
Gorai.010G048800.1.A	0.211967	1.59457	1.1014	0.589237	0.669728	1.08202	0.684807	0.235489	0.0486861	3.26876	2.8909	4.28599	0.209549	0.455818	1.44754	0.564187	dom10v05up	GRAS family transcription factor
Gorai.010G150000.1.D	1.37798	5.05958	10.778	20.3705	0.84667	2.48442	5.82967	16.9418	1.13239	6.91012	5.91879	6.6895	0.9839	0.779522	12.1944	3.01714	dom10v05up	NAD(P)H dehydrogenase B2
Gorai.010G173300.1.A	0.401648	3.54977	1.36939	0.121725	0.146122	0.5085	0.195823	0.113073	0	1.31427	2.9685	1.84901	0	0.36196	1.90889	0.147988	dom10v05up
Gorai.010G194600.1.A	0	0.0607173	0.791365	0.42162	0.0187149	0.0775579	5.47262	1.45845	0	0.0606628	0.0150381	0.16421	0.0254293	0	0.153143	0.0247315	dom10v05up	laccase 5
Gorai.010G194600.1.D	0	0.0187043	0.646306	0.24809	0.0187149	0	1.72281	0.1878	0	0.0722543	0	0.986825	0	0	0.0210673	0	dom10v05up	laccase 5
Gorai.010G198400.1.D	1.29854	2.97809	2.54181	2.14219	0.929028	1.52807	1.43472	2.06678	0.183901	0.909241	1.03718	1.7021	0.383451	0.251992	2.57733	0.0962807	dom10v05up	Alpha/beta hydrolase related protein
Gorai.010G202700.1.A	3.05425	82.3179	41.2469	3.11045	32.817	73.7499	54.9257	28.8422	1.16745	60.4444	70.2984	45.1745	16.2834	19.0068	117.454	5.76947	dom10v05up	alpha/beta-Hydrolases superfamily protein
Gorai.010G202700.1.D	4.04066	32.3032	58.358	90.3699	18.9558	30.5869	44.2907	89.1343	3.28734	31.8781	27.3972	24.0562	5.28982	3.98374	27.018	3.15632	dom10v05up	alpha/beta-Hydrolases superfamily protein
Gorai.010G241800.1.A	2.44185	3.81071	3.1691	6.936	1.76088	2.59274	2.76525	8.8641	2.01855	5.37106	5.10968	4.46104	1.50042	1.1262	3.82119	3.74556	dom10v05up	Leucine-rich repeat protein kinase family protein
Gorai.010G246700.1.D	19.7274	68.0997	63.1192	12.4989	18.3242	39.1584	52.0689	8.11275	0.165776	6.54737	19.862	16.6002	0.714229	0.999849	45.5153	1.2916	dom10v05up	alpha/beta-Hydrolases superfamily protein
Gorai.011G050200.1.D	3.43705	6.45602	5.92466	5.7498	10.1445	11.3784	12.9763	9.42417	4.13228	10.4864	7.7956	7.29661	6.6456	2.59284	9.37546	7.34564	dom10v05up	NPR1-like protein 3
Gorai.011G082000.1.A	0	0.00767397	0.0762351	0.110838	0	0	3.91123	0.275699	0	0.0989778	0	0.0249432	0.0198607	0.0343077	0	0.041413	dom10v05up	plant natriuretic peptide A
Gorai.011G134100.1.A	0.397178	1.76533	2.33499	2.07254	0.286598	1.7276	3.35081	1.5217	0.355058	5.04801	3.29517	5.34569	0.269449	0.250636	2.11511	0	dom10v05up
Gorai.011G182600.1.A	6.02182	8.45176	8.11282	7.7241	5.59306	7.51433	8.59567	6.30068	3.2446	8.43391	9.56609	15.9615	4.0936	1.96269	13.4245	1.54631	dom10v05up
Gorai.011G182600.1.D	12.1778	19.3837	15.6267	9.55579	14.5787	18.0076	19.2388	8.14505	10.9606	26.9766	29.6623	38.5748	9.7087	5.99999	33.5139	8.13166	dom10v05up
Gorai.011G195700.1.A	0.776523	2.83967	3.54702	4.12502	1.80391	2.78606	3.22856	3.50693	0.364915	1.48385	1.43523	1.85078	1.39328	0.639357	2.0027	0.900059	dom10v05up	photosystem II 11 kDa protein-related
Gorai.011G238500.1.A	3.14035	6.41414	5.41141	15.5857	2.02942	3.74389	4.78715	20.5895	0.874477	3.1571	7.01812	8.63188	1.15619	0.98654	15.3136	9.23887	dom10v05up	Calcium-dependent lipid-binding (CaLB domain) family protein
Gorai.012G006600.1.D	15.5121	244.978	295.132	30.0062	5.23558	34.2167	47.8219	1.36864	0.244492	90.7414	337.928	269.113	4.22846	0.855476	15.1337	1.54908	dom10v05up	HXXXD-type acyl-transferase family protein
Gorai.012G016200.1.D	0.086403	1.50108	1.0115	0.766066	0	0.16787	0.272515	0.164999	0.0512567	2.58894	0.269736	8.66014	0.208864	0.0228321	0.566951	0	dom10v05up	Peroxidase superfamily protein
Gorai.013G016900.1.D	1.69701	7.08408	2.57256	0.309877	0.430842	2.0023	1.70979	0.0637956	0.0327863	1.0725	2.38829	1.77773	0.0799612	0.225515	3.70206	0.295949	dom10v05up	LOB domain-containing protein 21
Gorai.013G081600.1.D	1.22657	5.79432	23.7289	39.018	1.14541	2.77801	13.1898	31.9275	0.174644	1.84634	1.81913	7.9625	0.139972	0.40359	2.72236	2.04809	dom10v05up	Regulator of Vps4 activity in the MVB pathway protein
Gorai.013G089900.1.D	0.755344	1.37015	1.55613	2.39349	0.553827	0.424555	1.03518	1.58392	0.221741	1.63959	0.599982	1.94241	0.955039	0.439233	2.36237	0.467398	dom10v05up
Gorai.013G197600.1.D	0.148155	0.582565	1.73087	2.09932	0.332805	0.14522	1.10763	1.77303	0	0.476123	0.375003	0.907387	0.0487417	0.0866717	1.32618	1.3177	dom10v05up	Sec14p-like phosphatidylinositol transfer family protein
Gorai.013G215800.1.D	16.1974	19.1695	20.6964	18.9022	16.3565	18.5212	26.0146	21.4138	6.88611	13.1335	13.0492	16.7861	9.27699	3.23106	20.9511	8.90058	dom10v05up	cyclic nucleotide gated channel 5
Gorai.013G260500.1.A	0.0531485	0.231957	0.267394	0.179127	0.0506569	0.0548445	0.112462	0.0958412	0.0671354	0.896235	1.3619	1.21946	0.145593	0.114393	1.5818	0.99237	dom10v05up	UDP-glucosyl transferase 71D1
Gorai.001G001800.1.A	0.311464	1.82362	5.43954	1.80136	0.31979	7.4419	11.5577	6.20695	0.5734	1.21917	4.78065	5.83812	0.96915	0.695592	3.5746	1.65082	dom15d10up	Peroxidase family protein
Gorai.001G122700.1.A	9.57272	11.9862	28.5167	65.5977	8.29075	13.1737	24.6852	77.696	8.67175	7.94646	11.8686	22.3537	10.0786	5.34247	16.1891	29.0932	dom15d10up	Late embryogenesis abundant (LEA) hydroxyproline-rich glycoprotein family
Gorai.002G062200.1.A	0.00832993	1.20076	13.33	3.68707	0	0.899082	3.61487	2.53887	0.0465248	0.064203	1.38265	12.0947	0	0.043699	0.779269	0.0785483	dom15d10up	cytochrome P450, family 87, subfamily A, polypeptide 2
Gorai.002G097200.1.A	0.0945047	1.08658	3.31778	1.91081	0.0516566	2.23452	5.52731	6.57365	0.0850268	0.342421	1.2005	2.80544	0.447373	0.349226	2.36444	3.91636	dom15d10up
Gorai.002G098900.1.A	3.0138	17.0115	44.5156	52.5305	3.67291	22.4967	43.6909	71.9472	10.2745	5.62347	12.6905	103.266	3.92869	1.36502	16.6863	15.2213	dom15d10up	zinc transporter 11 precursor
Gorai.002G099900.1.A	0.0237853	0.659051	2.36992	1.42844	0.0976041	2.59048	4.65516	7.71053	0	0.161728	0.910525	3.36131	0.160053	0.223722	3.64362	5.11909	dom15d10up	nuclear factor Y, subunit B3
Gorai.002G125900.1.A	0.950588	4.14554	18.0286	7.45286	0.981968	19.6883	38.9892	17.3322	1.42292	1.9983	4.99868	6.46547	2.53503	1.68968	10.9721	1.80352	dom15d10up	Walls Are Thin 1
Gorai.002G181300.1.D	0.331502	1.78869	6.22247	12.3713	0.390423	3.83577	4.54315	8.58579	0.703453	1.06163	1.98467	3.29578	1.43311	0.524514	2.353	6.62508	dom15d10up	dihydrosphingosine phosphate lyase
Gorai.002G234900.1.A	0.242496	2.67716	8.4432	6.89151	0.188514	2.96274	7.6121	9.43394	0.274668	0.575503	1.84243	5.33307	0.949806	0.727817	5.72657	13.1094	dom15d10up	BEL1-like homeodomain 1
Gorai.003G031100.1.A	20.9887	29.9509	61.9733	29.95	15.3503	17.0461	39.9462	27.5935	9.86272	16.1084	27.6687	31.3471	11.5474	5.23675	28.315	3.49709	dom15d10up
Gorai.003G134300.1.D	0.120914	1.56272	6.48147	4.90484	0.140562	4.23663	9.83983	4.34759	0.32251	1.22062	14.3958	115.454	0.690528	0.999037	14.3196	20.9903	dom15d10up	Pathogenesis-related thaumatin superfamily protein
Gorai.003G148800.1.A	0.393126	3.34822	6.9447	6.33136	0.690413	6.17258	15.114	15.4399	0.868893	1.7444	3.86584	6.44764	2.02857	1.17889	11.1588	12.0184	dom15d10up	Protein of unknown function (DUF640)
Gorai.003G149800.1.A	4.27342	6.88851	11.4939	9.07135	2.7948	8.39155	10.8959	10.7687	2.94702	4.11095	5.84883	11.8496	3.74852	1.811	6.88453	7.09279	dom15d10up
Gorai.003G159400.1.D	10.4529	46.3605	87.5604	27.1453	9.43399	56.4462	116.119	20.202	8.55248	8.51972	20.9848	44.633	9.84391	3.42644	34.9725	3.20628	dom15d10up	tubulin beta 8
Gorai.003G163800.1.D	1.61137	4.01267	12.4684	36.9344	2.30836	10.8186	17.8537	52.0051	1.48437	2.98363	5.13402	9.21682	2.86819	1.59984	11.3778	48.1341	dom15d10up	KNOTTED-like homeobox of Arabidopsis thaliana 7
Gorai.004G085500.1.D	0.0251534	0.940897	4.99199	11.4899	0.252767	1.50215	2.084	3.9331	0.149279	0.290599	1.10134	2.46607	0.434616	0.0955857	1.51508	3.16051	dom15d10up	Flavin-containing monooxygenase family protein
Gorai.004G126500.1.D	0.705447	11.0479	116.533	104.476	0.915487	7.68486	27.2979	45.1714	0.61234	0.52262	3.36979	27.8012	0.326479	0.0796753	5.62524	5.78495	dom15d10up	response to low sulfur 2
Gorai.004G135200.1.D	3.81007	4.53714	10.0564	16.2011	3.78887	7.88875	13.2241	23.8928	2.17121	3.10854	4.68046	6.99626	2.73746	1.43779	7.52516	14.7043	dom15d10up	adenine nucleotide transporter 1
Gorai.004G139000.1.D	1.7924	71.862	366.764	373.445	0.921483	43.8555	150.51	282.381	2.40078	10.7558	68.6768	298.243	5.89461	10.6662	157.182	218.583	dom15d10up	SPIRAL1-like2
Gorai.004G182300.1.A	10.1568	27.2197	51.7402	13.7873	8.61445	15.6119	20.0463	16.3356	4.85453	6.56045	9.3161	10.6453	4.94898	2.20098	12.0979	2.72901	dom15d10up	NAD(P)-binding Rossmann-fold superfamily protein
Gorai.004G210200.1.D	2.32994	6.02237	12.3828	22.9333	4.62076	10.4343	15.5403	29.3515	2.29302	3.81283	7.11787	19.2009	2.93967	0.815871	7.93654	1.24943	dom15d10up	Leucine-rich repeat protein kinase family protein
Gorai.005G080100.1.A	4.89898	80.9039	642.881	688.604	2.52523	90.2875	328.572	1221.38	6.42613	10.9843	39.0643	126.269	7.82644	10.1179	169.047	1430.12	dom15d10up	extensin 3
Gorai.005G096600.1.A	0.830885	2.3391	5.46819	9.25817	1.10149	5.75923	11.7912	14.2087	2.87786	2.83687	3.79685	7.00218	3.59631	1.42606	7.35589	8.45056	dom15d10up	ubiquitin-specific protease 16
Gorai.005G098900.1.A	2.50638	7.10124	17.5543	34.9066	1.32073	2.6699	5.79063	31.776	0.146745	0.643109	1.54683	19.1401	0.197736	0.725521	4.3593	11.6397	dom15d10up
Gorai.005G117900.1.A	0.288363	3.4952	9.51782	6.61463	0.867126	6.52362	13.7855	11.4791	0.598166	0.46228	2.80094	9.50202	0.462733	0.783217	4.76496	5.99801	dom15d10up
Gorai.005G153200.1.A	25.4976	63.756	149.061	189.272	24.1985	62.9783	136.002	374.208	5.20451	14.103	30.6261	82.2932	4.52324	6.93451	63.6701	44.0357	dom15d10up	xyloglucan endotransglucosylase/hydrolase 28
Gorai.005G168500.1.A	0.885964	8.11491	17.7643	21.1983	2.0692	7.22488	13.2009	25.9921	0.89168	1.36575	4.17759	13.533	1.71447	0.844273	7.23049	10.7574	dom15d10up	ELMO/CED-12 family protein
Gorai.005G195700.1.D	1.01047	2.0619	3.93514	5.13505	0.912097	2.11113	3.84323	5.10526	1.01593	1.06022	2.7435	5.11236	1.30904	0.285025	2.48412	3.5216	dom15d10up	hydroxyproline-rich glycoprotein family protein
Gorai.005G203900.1.D	0.0836789	2.63185	10.1903	33.1076	0.186557	11.9727	28.8943	64.6926	0.134212	0.339182	1.50858	4.20436	0.0582738	0.512613	7.40883	18.0069	dom15d10up	O-methyltransferase family protein
Gorai.006G052200.1.D	5.58093	7.26718	12.555	11.7188	4.04528	6.63009	8.57917	13.7517	3.11791	3.12786	4.45451	9.33153	3.67519	1.02967	7.30942	7.12237	dom15d10up	long-chain acyl-CoA synthetase 7
Gorai.006G105500.1.A	0.204469	0.852242	2.99057	1.90205	0.0950831	1.96644	4.63983	5.54864	0.0959947	0.11175	0.54545	1.34047	0.0835347	0.218179	1.1633	2.21567	dom15d10up	2-oxoglutarate (2OG) and Fe(II)-dependent oxygenase superfamily protein
Gorai.006G168300.1.A	6.28335	6.73978	11.1291	8.52275	5.4232	8.75381	12.6659	9.53999	3.24063	3.92793	5.11105	7.4837	4.39796	1.31522	7.42237	4.24473	dom15d10up	alpha/beta-Hydrolases superfamily protein
Gorai.006G215400.1.A	0.0390677	1.02301	5.41323	3.18797	0.0830831	0.141089	0.554934	2.69626	0.132368	0.038948	1.50255	5.31282	0.141327	0	3.28502	5.60928	dom15d10up	Plant invertase/pectin methylesterase inhibitor superfamily protein
Gorai.006G235800.1.A	0.300363	7.19027	23.7717	22.1768	0.355685	4.22666	11.9721	21.9689	0.4287	0.552778	4.22875	14.475	0.92643	1.02131	11.7164	6.78962	dom15d10up	thioredoxin H-type 9
Gorai.006G241100.1.A	0	0	0.0221903	13.4436	0	0	0	6.74654	0	0.00634007	0.0267038	0	0.0260455	0	0	274.086	dom15d10up	cupin family protein
Gorai.006G253500.1.D	0.157849	2.06394	14.3126	3.30128	0.0370573	3.06896	14.0936	0.759017	0.0939857	0.293193	1.41493	11.6198	0.123283	0.241168	11.6445	0.140061	dom15d10up
Gorai.007G048600.1.A	0.018985	0.125274	0.940667	3.63794	0.0149514	0.494058	1.96216	10.0494	0.206363	0.243433	1.02444	1.91473	0.0365523	0.179393	1.43531	7.79168	dom15d10up	Chaperone DnaJ-domain superfamily protein
Gorai.007G141800.1.D	3.44411	3.76146	6.90985	5.18589	4.10568	7.50289	11.0741	6.49557	2.91699	1.83883	3.17792	4.56691	5.82	1.82953	6.82722	7.17515	dom15d10up	basic helix-loop-helix (bHLH) DNA-binding superfamily protein
Gorai.007G150000.1.A	0.22585	1.5575	7.94087	4.73039	0.471043	5.25279	5.6544	10.9586	0.488317	2.4809	5.7726	6.62837	1.52632	1.21753	8.49139	15.6956	dom15d10up	indole-3-acetic acid inducible 11
Gorai.007G162400.1.D	0.306065	7.60688	23.0206	9.31713	0.313991	2.50176	8.45382	10.1453	0.11818	1.10708	3.1958	13.0288	0.126759	0.157892	4.76407	5.58095	dom15d10up	Cytochrome b561/ferric reductase transmembrane with DOMON related domain
Gorai.007G174000.1.D	1.01075	4.29711	11.3949	17.4583	1.22223	9.39025	22.6897	34.7373	1.3006	2.43678	5.23543	10.4324	2.6399	1.55655	10.8382	13.8146	dom15d10up
Gorai.007G301500.1.D	0.110264	0.0153072	0.435483	3.65411	0.530873	0.927694	3.9591	9.8418	0.209841	0.316669	3.28319	12.2422	0.0370397	0.661903	8.66988	6.12848	dom15d10up	Nodulin MtN3 family protein
Gorai.007G362200.1.D	0	0	0.181441	11.4685	0	0	0	17.5281	0	0	0.734391	2.42605	0	0.0304172	1.12883	14.0964	dom15d10up	myb domain protein 9
Gorai.007G372700.1.D	0.239988	8.0312	39.4095	42.2468	0.323719	12.0825	53.3293	52.3745	0.409405	0.725977	6.00235	21.7766	0.911449	0.400634	14.8903	35.5016	dom15d10up	gamma tonoplast intrinsic protein
Gorai.008G009800.1.A	0.0678552	0.611742	1.6451	0.897931	0.180466	1.37852	3.00335	2.25107	0.116407	0.157443	0.92241	1.46306	0.163629	0.0520146	0.85337	1.77198	dom15d10up	indeterminate(ID)-domain 2
Gorai.008G055600.1.D	0.897928	2.76913	6.40798	4.76336	0.789331	5.61362	6.77785	5.32817	1.27923	1.72762	3.74137	6.18855	2.90219	1.10111	5.33813	4.86203	dom15d10up	abscisic acid (aba)-deficient 4
Gorai.008G080800.1.D	0.518117	14.8156	45.4969	20.318	0.784834	25.497	68.5585	39.9957	0.956543	1.87863	11.4126	30.1714	1.69898	2.03582	20.5618	12.4895	dom15d10up	Peroxidase superfamily protein
Gorai.008G081100.1.D	2.39281	14.1008	33.4684	25.2475	4.24329	35.7586	39.1251	47.1763	1.85838	4.394	8.03224	16.1494	5.82275	5.23099	19.7431	36.0184	dom15d10up	LOB domain-containing protein 39
Gorai.008G158900.1.A	0.0300157	0.373597	2.74788	1.86878	0.0645198	1.33873	3.3072	2.0073	0	0	0.341131	2.29855	0.109818	0	1.11561	0.875028	dom15d10up	similar to RCD one 2
Gorai.008G203900.1.A	0.890735	8.82437	49.3064	3.96887	1.28503	8.42939	24.1167	3.15526	1.37475	1.75587	6.66584	18.9709	0.82387	0.551074	4.65457	0.504033	dom15d10up	Pectate lyase family protein
Gorai.008G226100.1.D	0.693624	1.12006	3.75176	5.27363	0.72493	1.88239	4.34644	8.05353	0.570372	0.522714	1.22653	3.38959	0.568849	0.27774	3.53917	6.797	dom15d10up	PLATZ transcription factor family protein
Gorai.008G259700.1.A	0.0156439	0.733852	3.55277	9.77086	0.0138693	0.58317	2.16977	13.0038	0	0.664936	3.88819	7.80069	0	0.312159	6.01777	2.81108	dom15d10up	NAC (No Apical Meristem) domain transcriptional regulator superfamily protein
Gorai.008G274500.1.A	11.2408	17.6522	32.4867	30.0014	9.47669	15.172	20.4535	16.9152	4.61319	10.1902	16.085	29.1206	5.80226	2.80096	26.8859	2.40076	dom15d10up	Homeodomain-like superfamily protein
Gorai.008G296500.1.A	1.27037	5.4589	13.367	14.1905	1.51724	7.26544	14.4632	21.4638	4.56781	5.70767	9.31718	15.8663	3.71924	1.69373	15.058	20.9908	dom15d10up	Thioredoxin superfamily protein
Gorai.009G008000.1.A	3.82031	7.29643	11.4956	9.70664	6.01736	12.3705	21.2587	20.6602	2.44545	4.40581	5.67796	11.2359	3.8418	2.77989	12.9724	10.3869	dom15d10up	tetraspanin8
Gorai.009G202600.1.D	1.85591	2.3386	4.33699	5.97624	0.984555	2.58312	4.81745	4.08119	2.56362	1.98546	2.83303	2.05336	2.31387	0.309	2.81586	3.48878	dom15d10up	Sec14p-like phosphatidylinositol transfer family protein
Gorai.009G203800.1.D	2.71195	4.93729	10.345	20.358	2.6213	6.76139	10.9043	25.8395	3.20833	2.63753	3.81751	6.98754	3.27786	1.31767	9.19671	10.4295	dom15d10up	C2H2-like zinc finger protein
Gorai.009G223000.1.A	0.2848	0.807809	2.32426	5.9769	0.416402	0.434373	1.66235	4.49778	0.0457897	0.168743	1.00271	1.816	0.049887	0.103767	2.39597	12.1755	dom15d10up	branched-chain amino acid transaminase 2
Gorai.009G244800.1.A	1.47922	10.6255	61.0005	26.7121	0.528635	26.1717	51.5778	38.7195	0.149595	0.345324	2.39909	7.30483	0.376416	0.261931	4.52519	6.01421	dom15d10up	nodulin MtN21 /EamA-like transporter family protein
Gorai.009G244800.1.D	2.15256	10.8791	59.0521	23.8883	0.418371	23.8027	45.8033	40.1443	1.71403	2.5482	8.71925	21.2191	2.17539	0.840513	15.7025	11.4952	dom15d10up	nodulin MtN21 /EamA-like transporter family protein
Gorai.009G292900.1.D	51.8948	90.4833	183.218	84.4428	53.0255	60.4524	112.357	70.307	27.1148	24.2078	41.2587	98.9596	24.5467	16.8443	118.914	15.0319	dom15d10up
Gorai.009G327400.1.A	0.492602	1.90976	4.92741	3.41194	0.347972	8.09266	14.5015	8.34878	0.583754	0.921108	1.89885	2.99857	0.633866	0.595645	4.49209	2.55557	dom15d10up	NSP-interacting kinase 2
Gorai.009G410700.1.A	0.0398825	0.680119	2.72221	6.2564	0.765713	1.22636	3.24991	7.30558	0.756861	1.12867	3.75084	10.0844	0.473032	0.639257	6.31712	2.01739	dom15d10up	NC domain-containing protein-related
Gorai.010G001500.1.A	0.221948	15.595	93.7163	218.311	0.614602	19.4539	88.5029	221.892	0.23597	0.649714	2.5831	26.4561	0.762673	1.10168	11.11	51.3968	dom15d10up	RING/U-box superfamily protein
Gorai.010G045900.1.D	0.286957	1.60615	6.08139	3.7898	0.168113	7.75627	16.9337	25.4328	0.267224	0.639905	2.6455	5.05964	1.01196	0.952355	9.28082	11.1054	dom15d10up
Gorai.010G051500.1.D	0.336662	5.56707	21.147	8.94942	0.135128	4.01455	10.2553	4.92868	0.115307	0.754967	2.94584	5.52642	0.118168	0.122184	1.97949	5.88064	dom15d10up	aldehyde dehydrogenase 3H1
Gorai.010G173600.1.D	0.133996	1.34036	8.28197	8.30953	0.0216656	2.35812	9.50538	15.2906	0.0330096	0.0613457	0.651792	4.23921	0.264123	0.082964	2.67476	9.17559	dom15d10up	Protein of unknown function (DUF581)
Gorai.010G180900.1.D	1.28849	5.72225	11.6067	7.87326	1.40662	4.8156	11.4966	6.91195	1.47625	2.01813	4.16564	5.58783	3.34894	1.24244	4.97577	3.9097	dom15d10up	APS reductase 3
Gorai.011G014600.1.A	0.0649294	1.46583	5.36017	0.781098	0.220209	0.647436	1.20974	0.72936	0.060328	0.569223	3.6965	3.80277	0.341668	2.17291	20.5179	0.56372	dom15d10up
Gorai.011G063900.1.A	0.124188	3.72293	16.8322	16.8981	0.021624	7.48595	25.3096	16.3459	0.213956	0.573238	2.38082	7.83657	0.77535	1.18579	20.3074	3.56662	dom15d10up	myb domain protein 26
Gorai.011G210700.1.D	0.0590507	0.027761	3.58756	24.6079	0.0111013	0.132221	4.29492	30.2873	0	0	0.0359424	3.42437	0	0.0425477	0	2.52057	dom15d10up
Gorai.011G242100.1.A	1.02153	2.29052	3.65875	3.38626	0.754244	2.98386	4.80039	4.88813	0.817857	1.05179	1.46219	1.94081	1.59668	0.504532	3.18449	3.51211	dom15d10up	ferric reduction oxidase 7
Gorai.012G054400.1.D	0.884358	2.23716	8.79683	6.34107	0.383348	4.32749	7.59107	12.5579	1.25645	0.996216	2.22062	5.81267	1.99885	1.20471	4.35146	5.6287	dom15d10up	mini zinc finger 1
Gorai.012G073600.1.A	3.57451	18.3751	62.8128	27.0088	2.41034	24.5655	57.0212	49.8659	2.42894	1.9439	5.23427	14.3506	3.79886	1.97583	20.4305	40.6806	dom15d10up	Bifunctional inhibitor/lipid-transfer protein/seed storage 2S albumin superfamily protein
Gorai.012G115300.1.D	3.508	8.56878	28.4303	10.7592	2.71002	5.55515	12.9711	6.84334	2.09386	3.20135	5.0987	15.5788	2.13478	0.593189	8.02222	0.732088	dom15d10up	SAC domain-containing protein 8
Gorai.013G025900.1.D	0.0236029	0.235799	1.63818	3.25288	0.110588	0.3068	1.99968	2.7774	0.0777647	0.157233	1.19352	10.0526	0.25448	0.0488567	1.28961	1.05563	dom15d10up
Gorai.013G032000.1.D	2.74419	5.51845	10.4399	6.08944	3.0502	10.0061	18.453	13.8007	2.38074	2.99218	4.67175	6.79652	3.19808	1.6473	16.5574	15.221	dom15d10up	xyloglucan endotransglucosylase/hydrolase 28
Gorai.013G045000.1.D	0.769485	5.75698	9.96837	4.74564	1.81621	5.12371	10.3214	6.63609	1.89117	2.77166	4.30874	7.45884	1.41194	0.697466	6.11384	2.46805	dom15d10up	plant U-box 26
Gorai.013G099800.1.A	0.0685765	0.307322	13.842	24.8337	0	0.288807	3.8565	11.426	0	0	0.123711	0.376303	0.0111442	0.012565	1.06301	1.81327	dom15d10up	isocitrate lyase
Gorai.013G105100.1.A	1.70936	2.44573	5.70341	6.9954	1.8199	1.7952	4.06459	7.20207	0.305447	0.381905	0.791178	2.7944	0.373275	0.217372	2.19766	0.285532	dom15d10up	plant glycogenin-like starch initiation protein 2
Gorai.013G179000.1.A	0	0.237306	2.82369	0.387565	0.0146469	0.11162	0.597861	0.0770367	0.115331	0.121374	0.90198	6.03954	0.137429	0.0507777	1.57483	0.0401827	dom15d10up	2-oxoglutarate (2OG) and Fe(II)-dependent oxygenase superfamily protein
Gorai.013G188700.1.D	0.140722	2.04097	6.25956	0.986107	0.17123	0.719105	2.64442	2.46983	0	0.231078	1.67863	3.93576	0	0.0862303	2.70998	0.747678	dom15d10up	RmlC-like cupins superfamily protein
Gorai.001G032300.1.A	70.7371	14.023	4.19289	5.43468	74.9679	23.9705	12.9263	6.69026	57.8834	48.4029	13.9256	6.91079	51.6377	10.4671	17.5268	4.02113	dom15v10down	Cytosol aminopeptidase family protein
Gorai.001G076900.1.A	14.2742	6.15159	4.41871	3.79002	11.3057	7.14811	7.19491	5.82725	13.6843	9.84251	3.96696	2.94745	13.0456	1.62679	6.69469	4.08386	dom15v10down	PLC-like phosphodiesterases superfamily protein
Gorai.001G119000.1.D	4.10868	0.764041	0.332023	0.194811	4.72506	0.827645	0.73014	0.378302	2.36733	2.22419	0.469155	0.249364	2.56949	0.5439	0.921482	0.30964	dom15v10down	Phototropic-responsive NPH3 family protein
Gorai.001G119800.1.D	20.2827	5.41005	3.18891	1.28696	20.7844	10.5188	8.23964	2.21822	18.3866	11.018	3.5612	3.14453	18.8359	3.5746	6.88623	4.86784	dom15v10down	nucleobase-ascorbate transporter 12
Gorai.001G126900.1.A	15.2022	2.40323	0.783346	0.691704	19.0306	1.59769	1.37515	0.389412	3.00409	3.20107	0.484559	0.277848	5.10758	0.230979	0.833176	0.039752	dom15v10down	strictosidine synthase-like 3
Gorai.001G218000.1.A	2.73985	0.276884	0.033657	0.110761	2.38317	0.341885	0.352449	0.072859	5.95116	1.96675	0.0566911	0.0729207	5.66612	0.626466	0.162238	0	dom15v10down	GDSL-like Lipase/Acylhydrolase superfamily protein
Gorai.001G218000.1.D	1.12692	0.187959	0.0184699	0.068809	2.8553	1.34869	0.396244	0.0940923	5.89727	2.97572	0.0538136	0.0320699	4.09562	0.245117	0.0733807	0	dom15v10down	GDSL-like Lipase/Acylhydrolase superfamily protein
Gorai.001G266600.1.D	42.1274	15.5921	9.0333	3.13018	53.5738	16.9851	15.2032	3.38386	58.1092	36.1206	10.922	6.1511	60.2132	5.95885	19.1022	0.994453	dom15v10down	GDSL-like Lipase/Acylhydrolase superfamily protein
Gorai.002G193700.1.A	82.474	4.82874	0.80813	0.403727	34.6082	2.61272	1.63057	0.225341	48.8051	34.2228	3.41893	1.42414	13.4837	1.50342	4.63574	0.35347	dom15v10down	Pollen Ole e 1 allergen and extensin family protein
Gorai.003G072700.1.A	17.0338	4.0216	1.03381	1.75392	15.6419	5.97343	3.37852	1.34572	7.98222	11.1272	1.65724	0.508548	7.40208	2.07973	2.74646	0.487055	dom15v10down	S-adenosyl-L-methionine-dependent methyltransferases superfamily protein
Gorai.003G084100.1.A	33.7016	27.9541	14.7808	16.4718	30.9054	22.2827	23.479	20.1458	31.2188	34.2049	15.1476	10.2424	27.3942	7.20822	18.6734	5.15984	dom15v10down	Potassium transporter family protein
Gorai.003G118200.1.D	8.41719	3.86076	2.70188	2.18015	5.16537	4.48581	4.13691	2.76577	6.51487	6.48639	2.78203	1.91753	6.25275	1.98743	4.88195	2.6728	dom15v10down	Sterile alpha motif (SAM) domain-containing protein
Gorai.004G015600.1.A	12.9156	4.79355	2.69077	1.76754	7.64724	5.37149	4.86711	2.86521	11.3641	10.1488	3.87256	2.96362	9.58937	1.57468	3.75857	0.534182	dom15v10down	ALBINA 1
Gorai.004G085900.1.D	22.9383	9.50047	4.92166	2.14285	26.1218	10.7196	7.68848	3.63601	24.7584	18.9791	6.90466	3.64288	27.2658	3.26163	7.40689	1.67527	dom15v10down	F-box/RNI-like superfamily protein
Gorai.004G143700.1.A	4.05395	1.00509	0.319997	0.0957541	2.82021	0.341991	0.119681	0.0180148	2.40673	1.26072	0.171589	0.051338	4.81481	0.364971	0.319283	0.0255036	dom15v10down	alpha/beta-Hydrolases superfamily protein
Gorai.004G210900.1.D	27.7725	4.03663	0.853779	0.0868387	17.4638	3.88992	1.16907	0.0343403	25.168	11.6566	1.66952	0.379605	15.2293	1.98365	2.29309	0.161323	dom15v10down	C2 calcium/lipid-binding plant phosphoribosyltransferase family protein
Gorai.004G249700.1.D	17.4691	3.27854	0.822159	0.572642	41.409	20.9521	6.90969	0.433337	20.517	8.16627	1.03329	0.721518	36.7624	1.26645	2.4604	0.0718647	dom15v10down	Li-tolerant lipase 1
Gorai.004G284600.1.A	16.7452	5.14654	3.26845	2.61711	29.3917	7.34474	7.75856	3.95583	25.3066	15.9922	5.37466	3.46904	17.1852	2.21355	5.91651	3.63773	dom15v10down	phospholipid:diacylglycerol acyltransferase
Gorai.005G028000.1.D	244.539	107.626	61.4442	7.89251	186.222	109.123	86.4623	12.5557	106.261	66.1987	19.379	11.5402	85.7271	16.612	40.5927	2.83088	dom15v10down	UDP-D-glucuronate 4-epimerase 6
Gorai.005G042100.1.A	13.0781	1.08776	0.0748143	0.033975	3.40376	1.16813	0.584132	0.0283518	3.74774	2.47588	0.386007	0.0923417	5.7969	0.357903	0.407832	0	dom15v10down	Copper amine oxidase family protein
Gorai.005G042100.1.D	25.5786	2.18126	0.104022	0.0856413	7.44738	2.82276	0.807257	0.0210183	9.03264	2.64232	0.17653	0.173141	11.9662	0.323969	0.278998	0	dom15v10down	Copper amine oxidase family protein
Gorai.005G112000.1.D	24.3952	12.3776	3.08091	1.28578	15.4476	7.90658	3.94101	0.642433	17.1893	11.2473	2.2919	1.84088	27.8201	6.35841	5.45132	0.412753	dom15v10down	Pathogenesis-related thaumatin superfamily protein
Gorai.005G185000.1.D	12.4471	1.99552	0.56775	0.388244	18.8974	3.15616	1.60435	0.348649	18.7789	17.5371	1.75084	0.144646	27.5144	1.53298	1.06071	0.162185	dom15v10down	TRICHOME BIREFRINGENCE-LIKE 27
Gorai.005G187700.1.D	50.2967	15.1349	9.08706	7.38505	63.4747	23.4625	18.0894	5.58749	48.2609	23.587	7.8485	5.50876	47.9618	5.96301	16.9381	2.59587	dom15v10down	pyruvate dehydrogenase complex E1 alpha subunit
Gorai.005G192200.1.D	45.6275	16.8572	10.0488	5.06137	30.4364	17.8535	15.3322	6.68981	38.1902	26.9827	10.7923	8.39391	46.3266	5.62482	13.4926	8.41665	dom15v10down	Metallo-hydrolase/oxidoreductase superfamily protein
Gorai.005G217200.1.D	42.5453	15.9963	3.37638	0.762688	65.7736	26.1538	19.9095	1.91352	44.1468	31.1379	4.00794	2.38148	50.6601	4.64571	6.27231	1.98077	dom15v10down	EXORDIUM like 5
Gorai.006G267300.1.D	1.82344	0.423189	0.171499	0.10606	2.24119	1.01963	0.679889	0.166707	2.29122	2.02978	0.433386	0.163063	2.39496	0.231426	0.682757	0.0360738	dom15v10down	Protein kinase superfamily protein
Gorai.006G269800.1.A	24.5368	13.305	7.67783	4.08627	17.2165	11.7959	9.30326	3.96381	30.7763	20.7587	7.80253	5.47825	19.4704	3.96739	19.2928	2.40459	dom15v10down	alpha/beta-Hydrolases superfamily protein
Gorai.007G097700.1.A	78.388	77.1246	47.0497	22.3155	91.0191	57.453	46.5234	30.805	103.056	110.298	39.7308	47.5563	68.456	31.7514	81.8612	11.4731	dom15v10down	Remorin family protein
Gorai.007G122300.1.D	2.41883	1.52037	0.466645	0.55148	2.96627	0.473926	0.637366	0.428324	3.02891	2.04407	0.318072	0.877723	3.50111	0.104098	0.32007	1.30508	dom15v10down	WRKY DNA-binding protein 35
Gorai.007G186000.1.D	117.918	27.5267	9.01802	12.3967	109.507	18.6535	12.4312	14.6881	120.352	87.3791	22.5696	9.8992	110.726	16.61	25.073	8.78516	dom15v10down	receptor-like kinase 1
Gorai.007G198900.1.A	77.6111	22.8122	10.3702	5.95532	117.871	47.7133	33.1866	15.3181	86.991	46.2423	12.4202	11.4083	57.1244	9.53512	20.2806	8.27512	dom15v10down	beta-galactosidase 3
Gorai.007G206100.1.D	42.0262	8.87742	4.51121	4.35215	74.68	9.36298	6.17143	5.65433	33.7185	21.9534	4.48444	4.75752	27.6772	4.52076	7.31444	2.58112	dom15v10down	Quinone reductase family protein
Gorai.007G214000.1.D	12.3065	2.82204	1.32336	0.68381	6.28232	2.66575	2.6692	1.69081	24.8319	15.619	3.29121	1.59741	20.6857	2.197	2.91774	0.191281	dom15v10down
Gorai.007G245500.1.A	458.977	219.19	68.5106	11.1669	382.388	121.945	42.0019	5.27517	207.095	142.176	23.5881	10.3058	162.054	8.36674	17.2001	0.905917	dom15v10down	Glutathione S-transferase family protein
Gorai.008G019200.1.A	38.6559	18.5724	13.4189	12.2066	25.5232	13.6682	14.8434	11.8463	30.0203	29.1877	12.2927	8.75965	29.6422	6.02573	15.6884	3.60168	dom15v10down	Pyruvate kinase family protein
Gorai.008G048200.1.A	7.50469	1.9119	0.956124	0.588346	5.85318	2.63714	1.99097	0.815511	5.51765	2.73783	0.702256	1.11084	10.3085	0.52372	1.49411	0.0237403	dom15v10down	TCP-1/cpn60 chaperonin family protein
Gorai.008G100000.1.D	20.3499	2.86391	0.724616	0.624083	21.5862	1.17622	0.682357	0.12247	3.29471	2.28562	0.272648	0.323331	2.67186	0.259339	0.560591	0.45284	dom15v10down	Fasciclin-like arabinogalactan family protein
Gorai.008G119500.1.D	4.63013	4.31867	1.97507	1.0135	5.58826	3.95919	3.24803	1.48177	6.61915	5.59598	1.84008	1.15583	7.49502	1.25615	3.22976	0.220987	dom15v10down	Pentatricopeptide repeat (PPR) superfamily protein
Gorai.008G121400.1.A	2.39482	1.33503	0.403716	0.241966	1.92798	1.24299	0.992116	0.223444	1.53749	1.51902	0.232308	0.284433	3.00262	0.132094	0.492961	0.0726397	dom15v10down	RHO guanyl-nucleotide exchange factor 3
Gorai.008G122000.1.D	42.3044	7.69477	4.76753	5.36719	31.5577	9.90517	8.21589	6.63914	9.81463	5.45974	1.94052	1.95328	8.19275	1.45026	3.55556	1.0901	dom15v10down	BR-signaling kinase 3
Gorai.008G242400.1.D	15.61	9.6908	6.97889	7.13266	14.8611	8.38807	9.41857	6.89363	10.3119	11.1789	3.93234	3.86437	8.85969	2.01253	7.40583	2.891	dom15v10down	FIZZY-related 2
Gorai.009G034500.1.D	11.5402	2.10219	1.1091	1.03529	6.99484	2.61611	1.68764	1.56675	10.4317	6.69734	1.67245	0.887282	9.19794	1.29206	2.87495	2.54672	dom15v10down	BREVIS RADIX-like 4
Gorai.009G058400.1.A	10.7622	1.07931	0.403878	0.170259	5.57791	1.50787	1.32065	0.356181	7.22842	5.6342	0.745665	0.252618	7.4594	0.605874	0.934005	0.203589	dom15v10down
Gorai.009G118400.1.A	5.32743	5.88909	2.90591	3.14072	4.44894	5.17323	7.01087	7.65142	4.65752	8.59616	2.06277	1.58147	7.23973	0.885029	3.75071	8.08838	dom15v10down	O-fucosyltransferase family protein
Gorai.009G149800.1.A	23.9424	15.766	6.47004	4.11677	12.0441	4.83514	4.3476	1.66798	10.3424	12.175	3.3414	3.25784	9.5816	3.66877	6.27245	2.35106	dom15v10down	photosystem I subunit F
Gorai.009G179700.1.D	132.63	150.987	14.526	2.78591	18.3409	9.05892	3.3958	0.444662	0.0710541	1.35863	0.0523181	0.105095	0.0668523	0.45277	0.300311	0	dom15v10down
Gorai.009G206600.1.A	0.0092344	0.367756	0.0267079	0.791504	0.165217	0.263861	0.0780305	0.026798	0.768081	0.626966	0.0197304	0	1.58922	0.0628179	0.17908	0.0296887	dom15v10down	cytochrome P450, family 82, subfamily C, polypeptide 4
Gorai.009G206700.1.D	0.209517	0.347955	0.058154	0.563501	1.19453	2.75564	2.07212	1.0626	3.29806	3.3106	0.450108	0.0420889	7.30098	0.625772	2.39731	0.373171	dom15v10down	cytochrome P450, family 82, subfamily C, polypeptide 4
Gorai.009G236100.1.A	17.9441	3.01952	1.62388	1.19642	20.8164	4.33835	3.27558	1.22549	5.58282	6.16261	1.2756	1.25094	7.26999	1.06474	2.71202	0.297305	dom15v10down	S-adenosyl-L-methionine-dependent methyltransferases superfamily protein
Gorai.009G349800.1.D	31.2277	10.815	3.31853	1.2468	24.8474	12.3098	6.99582	8	51.2587	22.2572	3.21877	1.36054	88.7202	4.13635	4.44276	0.355248	dom15v10down	HXXXD-type acyl-transferase family protein
Gorai.009G451500.1.D	20.3626	10.2751	6.59835	4.76783	21.5657	14.7034	13.7931	6.07712	20.608	14.2692	4.44633	4.0019	27.7186	4.3103	8.94534	8.67185	dom15v10down	D6 protein kinase like 2
Gorai.010G007300.1.D	46.3633	10.9448	2.71957	0.533384	44.948	16.1127	8.75717	1.15911	51.0725	33.5548	7.92603	2.99128	34.3966	5.12649	8.55133	0.513408	dom15v10down	beta-galactosidase 5
Gorai.010G191800.1.A	6.54173	1.35809	0.243854	0.0160506	13.2041	3.03524	1.11928	0	6.85271	5.46624	0.556274	0.110263	4.37221	0.419716	0.250632	0.0383393	dom15v10down	basic helix-loop-helix (bHLH) DNA-binding superfamily protein
Gorai.010G234300.1.A	22.8004	7.11308	2.73362	0.439878	15.0631	3.98425	2.33265	0.474519	29.2712	15.2767	3.0889	1.61186	21.2058	2.6551	5.96855	1.01756	dom15v10down	phospholipid:diacylglycerol acyltransferase
Gorai.011G001100.1.D	23.7059	9.37844	6.45259	2.74889	20.2467	12.2727	9.45785	4.01392	15.2598	11.6155	4.42315	3.68818	17.6805	2.38153	7.1347	0.560609	dom15v10down	nudix hydrolase homolog 3
Gorai.011G016500.1.D	12.8919	2.23522	0.262836	0.0120547	27.2856	2.8568	0.998247	0.139824	27.1243	18.3653	2.16598	0.564131	32.7435	3.83592	3.6242	0.43453	dom15v10down	xyloglucan endotransglucosylase/hydrolase 8
Gorai.011G038000.1.A	28.5779	5.52076	0.273168	0.414994	22.5421	3.22212	1.32475	0.271579	18.0101	17.4619	2.07061	0.365807	20.8231	2.44663	1.38222	1.66199	dom15v10down	receptor like protein 51
Gorai.011G071900.1.D	1.75075	0.252565	0.0361127	0.0331079	1.76021	0.422425	0.358217	0.0363587	2.88676	4.55405	0.250588	0	3.35365	0.474281	0.142734	0.0293741	dom15v10down	downstream target of AGL15-4
Gorai.011G088100.1.A	10.0965	4.07791	1.88993	0.881873	7.30018	1.44425	1.69972	0.93799	8.19907	8.31039	2.54739	1.82324	7.81902	1.00799	2.63312	0.0635533	dom15v10down	Phosphoglycerate mutase family protein
Gorai.011G131000.1.D	6.7263	2.5936	1.29447	1.19677	4.84066	2.77275	2.17176	1.33078	2.84255	1.6732	0.423353	0.5699	2.6567	0.165699	0.910195	0.0444393	dom15v10down	Integrin-linked protein kinase family
Gorai.011G153500.1.D	97.8898	27.2674	14.8662	5.67892	30.3469	22.5339	25.4731	4.71445	44.0028	20.7712	6.66051	7.8215	72.2867	18.2278	51.6758	6.29655	dom15v10down	UDP-D-glucuronate 4-epimerase 6
Gorai.011G186300.1.D	3.3545	4.50363	1.64964	0.639381	1.474	0.898227	0.723728	0.250271	2.71423	5.15537	0.657659	0.570497	2.6581	1.8291	3.06492	0	dom15v10down	Uncharacterised protein family (UPF0497)
Gorai.011G241500.1.D	38.1193	11.531	4.40919	2.30442	56.5362	16.5539	10.7115	2.69587	44.5973	37.2273	6.69789	2.15141	45.9268	7.45858	10.3257	1.42416	dom15v10down	RNA-binding (RRM/RBD/RNP motifs) family protein
Gorai.012G019500.1.A	4.54099	1.23556	0.0356946	0.0094831	4.15873	0.691692	0.131916	0.013311	8.00778	11.9077	1.29187	0.110252	12.4222	1.12953	1.10181	0	dom15v10down	sulfotransferase 2A
Gorai.012G042500.1.A	16.1855	5.41403	3.08374	1.68875	6.78392	4.28359	5.46795	2.00898	9.57846	6.77887	1.76163	2.95073	14.5975	0.522702	2.9167	1.9772	dom15v10down	galacturonosyltransferase 15
Gorai.012G086500.1.A	21.1542	6.20415	2.05584	0.630754	14.5913	4.4749	2.85405	0.377105	8.68089	4.5567	0.679153	1.13854	6.51835	0.683037	1.22056	0.101463	dom15v10down
Gorai.012G111500.1.A	42.0682	10.9495	3.57647	2.01202	37.2044	14.917	8.25891	3.18838	26.5721	15.8028	4.02696	4.55819	30.7704	3.64891	7.5178	1.28008	dom15v10down	3-oxo-5-alpha-steroid 4-dehydrogenase family protein
Gorai.012G129000.1.A	2.19595	3.00884	0.867876	2.66973	11.596	10.6595	5.53297	2.05428	26.0631	16.1788	1.93379	2.1245	42.0335	5.48648	5.04077	1.02078	dom15v10down
Gorai.012G145300.1.D	66.6274	42.8315	3.38862	0.189429	30.0421	4.86855	1.78228	0.0516696	26.1456	21.0488	2.52727	1.05989	12.2992	7.79616	10.4653	0.247568	dom15v10down	Class I glutamine amidotransferase-like superfamily protein
Gorai.012G154100.1.D	0.219506	0.267666	0.0411393	0.0292065	0.122751	0.249411	0.123365	0.0228395	1.73766	4.75951	0.200438	0.0711813	1.84946	0.0437864	0.269458	0.062216	dom15v10down	arginine decarboxylase 1
Gorai.013G037200.1.D	10.6889	5.94769	3.26938	2.50232	7.29762	3.61511	2.91904	1.85599	7.84772	8.23087	3.00574	2.45522	6.79532	1.57548	4.48842	0.619085	dom15v10down	Erythronate-4-phosphate dehydrogenase family protein
Gorai.013G100600.1.D	4.51422	3.47823	2.47583	4.20582	4.79458	4.82311	4.16859	4.4143	5.70511	4.53344	1.94952	1.46602	3.38315	0.845742	2.62992	0.592779	dom15v10down	glutamate receptor 3.4
Gorai.013G146900.1.D	9.73747	3.8749	2.2231	1.46269	8.68972	4.30661	3.69193	2.15835	5.69156	5.45678	1.84117	1.21727	6.39196	0.777548	2.35715	0.197355	dom15v10down	CTP synthase family protein
Gorai.013G184200.1.A	25.7441	4.63559	1.63697	0.547534	36.4593	5.25037	2.55708	0.392614	20.0084	8.47744	1.50638	0.934907	23.0915	1.49669	1.58875	1.08871	dom15v10down	growth-regulating factor 5
Gorai.013G239800.1.D	0.682692	0.98036	0.172543	0.635766	5.79029	6.42613	5.58343	3.08678	11.4274	10.5259	1.72174	0.220896	45.89	3.84944	10.3947	3.28946	dom15v10down	2-oxoglutarate (2OG) and Fe(II)-dependent oxygenase superfamily protein
Gorai.013G239900.1.D	0.918617	2.69661	0.701202	7.14847	7.51225	9.42651	9.21641	4.66868	14.2429	13.3449	1.87956	0.460989	42.8222	2.6333	7.77718	3.13744	dom15v10down	2-oxoglutarate (2OG) and Fe(II)-dependent oxygenase superfamily protein
Gorai.013G242500.1.D	4.9292	1.34611	0.526432	0.172315	4.22656	3.60992	3.85863	0.742924	8.2251	7.45242	1.98147	1.12014	7.4216	1.483	2.84877	1.57159	dom15v10down	RING/U-box superfamily protein
Gorai.002G132800.1.D	1.65891	1.85158	4.46965	9.95506	1.3851	3.55353	6.90079	9.15256	1.37687	1.8667	1.19124	3.51275	2.56192	1.00795	3.91515	5.37084	dom20d15up	Protein of unknown function (DUF620)
Gorai.002G177200.1.D	17.0571	21.8996	37.0167	128.516	21.0041	60.0799	88.1319	133.641	31.7266	18.0304	12.7829	50.2253	46.8267	8.18678	53.323	36.4873	dom20d15up	conserved peptide upstream open reading frame 28
Gorai.003G026800.1.A	1.30189	1.28298	26.3635	116.024	2.35141	3.2965	48.1059	100.124	1.76522	2.02369	1.27711	12.5405	2.29382	1.38298	11.3051	7.48147	dom20d15up	Nucleotide-diphospho-sugar transferases superfamily protein
Gorai.003G101000.1.A	2.94292	17.687	37.1519	72.5231	4.93723	43.1832	79.8625	60.6817	6.42034	9.35396	10.5844	25.7924	14.6916	6.04711	35.6744	6.42572	dom20d15up	glucan endo-1,3-beta-glucosidase-like protein 3
Gorai.003G132600.1.D	0.0623574	0.330255	0.648535	2.38568	0.0876863	0.879468	1.18487	0.561338	0.0746254	0.23014	0.0861033	0.938771	0.158131	0.105958	1.46542	0.57655	dom20d15up
Gorai.004G062100.1.A	2.0461	3.31188	4.26955	13.3046	2.93021	1.62132	5.79518	0.988912	0.924508	6.37904	3.85261	19.6864	0.733695	0.935639	13.2267	2.93415	dom20d15up	ethylene-forming enzyme
Gorai.005G077400.1.D	0.833499	3.81058	9.41658	16.1715	1.35632	5.48334	12.291	13.741	0.79659	2.18189	3.06439	9.55803	2.34987	1.70486	6.7558	4.81173	dom20d15up
Gorai.005G237200.1.A	0.657567	3.05015	8.96902	18.8313	1.17285	5.65747	14.6378	17.7447	1.3659	2.39517	1.60207	5.97362	2.31348	0.620019	5.76545	5.76761	dom20d15up	plant U-box 26
Gorai.007G133800.1.A	9.67593	12.2749	17.2413	19.9537	10.1936	16.3497	30.2568	28.7383	7.86836	9.78098	7.64913	11.9492	9.4706	3.16185	16.5661	7.90399	dom20d15up
Gorai.007G291800.1.A	1.00444	0.986668	1.7264	2.58068	1.00574	1.8558	3.08824	3.32388	1.12812	0.991479	0.599825	1.48789	1.30428	0.302538	1.0335	0.355635	dom20d15up	homolog of yeast autophagy 18 (ATG18) H
Gorai.008G216200.1.A	0.0254077	0.0648651	0.491574	3.19448	0	0.0866989	0.932658	2.4063	0.0990572	0.0434901	0.0683448	1.02415	0.0739992	0	0.0107051	0.0223741	dom20d15up	phosphate starvation-induced gene 3
Gorai.009G064900.1.A	0.364553	0.673852	2.70754	10.0773	0.210128	8.09581	10.1484	6.7768	0.490203	1.20776	0.624154	4.11496	0.852509	0.460449	1.7058	5.74386	dom20d15up	Eukaryotic aspartyl protease family protein
Gorai.009G262900.1.A	1.1784	1.28144	2.34423	4.14507	2.47005	2.28694	4.26809	4.39235	1.22149	1.1067	1.06715	2.08175	0.913628	0.227067	1.68794	0.996624	dom20d15up	ARM repeat superfamily protein
Gorai.009G432500.1.D	4.26585	12.2825	18.7644	37.405	5.35012	14.419	24.9966	18.6447	4.2254	4.56544	3.91462	12.2574	6.27631	2.1593	11.3048	4.68794	dom20d15up	Peroxisomal membrane 22 kDa (Mpv17/PMP22) family protein
Gorai.010G007800.1.A	0.0536935	0.256367	2.47321	8.44027	0.266276	0.757896	5.84689	10.9231	0.136102	0.15894	0.138069	1.36066	0.261862	0.0867304	0.533833	0.0459055	dom20d15up	BEL1-like homeodomain 7
Gorai.010G114900.1.A	1.77659	2.25054	2.15597	3.81786	3.43602	6.83329	6.07707	6.9568	1.98373	2.82637	2.32699	5.27453	4.87978	1.48123	5.17971	3.65856	dom20d15up	EIN3-binding F box protein 1
Gorai.011G206000.1.A	6.29827	3.67274	7.61754	14.0907	4.52909	6.26442	13.4277	12.8072	7.84185	5.03644	2.59504	5.5662	10.527	1.60731	5.02331	2.54937	dom20d15up
Gorai.011G283400.1.A	3.63098	2.10549	4.89084	13.0128	1.65003	1.55543	2.5328	3.89061	0.456397	1.35085	0.666421	3.72598	0.713676	0.345999	1.38597	1.46457	dom20d15up	plasma membrane intrinsic protein 1;4
Gorai.013G247600.1.A	16.4339	13.4207	18.0421	20.428	18.1833	22.7189	30.0416	23.7161	19.9994	14.7647	11.8695	16.8379	20.1316	4.82998	20.8594	11.8232	dom20d15up	P-loop containing nucleoside triphosphate hydrolases superfamily protein
Gorai.013G247800.1.A	1.70422	2.39329	3.93429	5.61421	1.31534	3.72753	6.51295	6.79659	0.883311	2.07985	1.74266	3.5885	1.35614	0.739615	4.03475	1.43455	dom20d15up	Galactose oxidase/kelch repeat superfamily protein
Gorai.001G092100.1.D	8.60597	9.72117	6.1293	2.04266	8.40467	8.30912	5.3288	2.96585	7.38242	7.77526	5.28383	2.20395	8.21807	2.45138	8.25314	1.11272	dom20v15down	Eukaryotic aspartyl protease family protein
Gorai.002G013200.1.A	0.279762	3.63263	0.0250815	0	0	3.13229	0	0	1.84888	7.50835	1.13463	0	3.20708	0	0	0	dom20v15down	low-molecular-weight cysteine-rich 12
Gorai.002G027300.1.A	3.48579	2.88989	2.33009	0.967881	3.36337	1.85765	1.59177	0.86865	2.65518	4.04637	1.8528	0.787494	3.3287	0.732682	3.09067	0.209896	dom20v15down	Mitochondrial transcription termination factor family protein
Gorai.003G058100.1.A	38.3137	12.0513	1.47759	0.352078	23.4988	6.93851	0.974262	0.409985	14.5964	9.95539	3.98944	0.817614	12.6562	3.44333	2.48201	0.110618	dom20v15down	gamma-tocopherol methyltransferase
Gorai.004G014000.1.D	9.10971	6.47163	5.68568	3.74621	8.20301	5.90099	6.55852	4.61185	10.1812	10.9815	8.76079	6.54305	11.1072	1.87067	8.90968	2.32714	dom20v15down	dgd1 suppressor 1
Gorai.004G227000.1.D	1.43589	1.48555	0.811353	0.123392	0.396519	2.2905	1.06466	0.255595	0.254872	1.11495	1.99755	0.308005	0.962389	0.825027	1.97788	0.144426	dom20v15down	TCV-interacting protein
Gorai.004G283400.1.A	1.91442	1.4239	1.17851	0.586539	3.79718	2.41361	2.47856	1.82313	2.76744	2.83724	2.33412	1.11286	3.70469	0.607744	2.96441	0.954183	dom20v15down	Insulinase (Peptidase family M16) protein
Gorai.006G023300.1.A	0.782714	0.606469	0.255264	0.0250548	0.659134	0.672477	0.947095	0.421806	0.563266	0.618134	0.763153	0.15737	0.629651	0.0828826	0.630835	0.0588533	dom20v15down	Tetratricopeptide repeat (TPR)-like superfamily protein
Gorai.007G023200.1.A	28.244	21.7327	11.5684	5.80136	12.6986	10.3208	7.45461	3.99493	10.6618	21.4023	16.5227	8.96331	13.3015	4.92059	27.3203	9.06189	dom20v15down	glutathione S-transferase THETA 1
Gorai.007G233000.1.A	232.039	63.0324	43.5344	20.2306	249.606	75.9697	73.8876	48.1292	310.961	285.849	156.23	77.6928	282.076	103.038	239.264	31.2756	dom20v15down	Protein-tyrosine phosphatase-like, PTPLA
Gorai.007G301800.1.D	144.96	190.17	33.906	11.3743	35.3779	42.2352	19.1517	6.92658	16.6615	38.7089	41.9348	13.0525	21.1724	19.8097	41.8996	6.01964	dom20v15down	alpha/beta-Hydrolases superfamily protein
Gorai.007G352500.1.A	41.0221	19.6184	3.38493	0.597342	33.3422	17.39	6.32804	4.18985	22.7431	19.6853	9.47905	3.07153	21.7864	3.3871	7.96774	0.802731	dom20v15down	F-box family protein
Gorai.008G115000.1.D	10.6215	6.9972	4.5414	2.36258	11.0817	6.00713	4.45162	3.07583	7.73983	8.13226	4.58623	2.56004	6.13073	1.60979	4.99674	0.954604	dom20v15down	Calcium-dependent lipid-binding (CaLB domain) family protein
Gorai.009G061700.1.D	10.2507	4.04605	2.48841	0.99772	4.84037	1.99576	1.34121	0.730685	5.88793	5.98022	2.02955	0.799599	6.81425	1.3545	3.65647	4.26513	dom20v15down	aldehyde dehydrogenase 11A3
Gorai.009G167400.1.A	10.3535	5.64178	3.57032	1.89433	8.33174	4.84671	3.77559	2.4936	10.0106	6.68174	3.55454	2.11587	8.68042	1.43113	4.80355	2.2905	dom20v15down	Mitochondrial substrate carrier family protein
Gorai.011G191800.1.D	53.7861	26.7668	14.0644	6.74059	45.6794	24.9166	18.0156	11.0959	68.8277	57.242	27.2989	15.8816	54.8296	10.3968	30.8093	13.5698	dom20v15down	multifunctional protein 2
