# Supplementary material for: Domestication over Speciation in Allopolyploid Cotton Species: A Stronger Transcriptomic Pull
Source: Genes (Basel). 2023 Jun 20;14(6):1301. doi: 10.3390/genes14061301 (PMC10298526; doi:10.3390/genes14061301)
Supplement: Supplementary file 1 [file genes-14-01301-s001.zip › Supplementary Table S3.xlsx]

## Sheet: Sheet1
Supplementary Table S3. Homoeolog expression bias within and between samples. The number of genes exhibiting biased expression toward the A- or D- subgenomes was tabulated and a Test of Portions (prop.test in R) was conducted. Inter-sample comparisons were also conducted to represent the differences between species, condition, and/or DPA. Only significant between sample tests are shown. AD1 = G. …
	A-biased	D-biased	HEB genes (total)	pvalueMomGreater	pvalueDadGreater	pvalueMomLess	pvalueDadLess	significant
AD1_05DPA_wild	2062	2272	4334	0.9993	0.0007	0.0007	0.9993	Dad
AD2_05DPA_wild	1885	2122	4007	0.9999	0.0001	0.0001	0.9999	Dad
AD1_05DPA_domesticate	2574	2895	5469	1	0	0	1	Dad
AD2_05DPA_domesticate	2259	2465	4724	0.9986	0.0014	0.0014	0.9986	Dad
AD1_10DPA_wild	2059	2331	4390	1	0	0	1	Dad
AD2_10DPA_wild	1336	1257	2593	0.0628	0.9372	0.9372	0.0628	Neither
AD1_10DPA_domesticate	3820	4246	8066	1	0	0	1	Dad
AD2_10DPA_domesticate	2491	2730	5221	0.9995	0.0005	0.0005	0.9995	Dad
AD1_15DPA_wild	3810	4432	8242	1	0	0	1	Dad
AD2_15DPA_wild	2046	2341	4387	1	0	0	1	Dad
AD1_15DPA_domesticate	3720	4147	7867	1	0	0	1	Dad
AD2_15DPA_domesticate	3935	4266	8201	0.9999	0.0001	0.0001	0.9999	Dad
AD1_20DPA_wild	4024	4388	8412	1	0	0	1	Dad
AD2_20DPA_wild	2014	2109	4123	0.9284	0.0716	0.0716	0.9284	Neither
AD1_20DPA_domesticate	2797	3090	5887	0.9999	0.0001	0.0001	0.9999	Dad
AD2_20DPA_domesticate	1966	2148	4114	0.9976	0.0024	0.0024	0.9976	Dad
Sample 1	Sample 2	homoeolog	Proportion Sample 1	Proportion Sample 2	pvalue
AD1_10DPA_wild	AD2_10DPA_wild	A	0.47	0.52	0.0002
AD2_10DPA_wild	AD2_10DPA_domesticate	A	0.52	0.48	0.0016
AD2_05DPA_wild	AD2_10DPA_wild	A	0.47	0.52	0.0004
AD2_10DPA_wild	AD2_15DPA_wild	A	0.52	0.47	0.0001
AD1_15DPA_wild	AD1_20DPA_wild	A	0.46	0.48	0.0389
AD2_15DPA_wild	AD2_20DPA_wild	A	0.47	0.49	0.0436
AD1_10DPA_wild	AD2_10DPA_wild	D	0.53	0.48	0.0002
AD2_10DPA_wild	AD2_10DPA_domesticate	D	0.48	0.52	0.0016
AD2_05DPA_wild	AD2_10DPA_wild	D	0.53	0.48	0.0004
AD2_10DPA_wild	AD2_15DPA_wild	D	0.48	0.53	0.0001
AD1_15DPA_wild	AD1_20DPA_wild	D	0.54	0.52	0.0389
AD2_15DPA_wild	AD2_20DPA_wild	D	0.53	0.51	0.0436
