# Supplementary material for: Domestication over Speciation in Allopolyploid Cotton Species: A Stronger Transcriptomic Pull
Source: Genes (Basel). 2023 Jun 20;14(6):1301. doi: 10.3390/genes14061301 (PMC10298526; doi:10.3390/genes14061301)
Supplement: Supplementary file 1 [file genes-14-01301-s001.zip › Supplementary Table S4.xlsx]

## Sheet: Sheet1
Supplemental Table S4. Module number, size, and functional annotation for modules with significance under domestication (4), domestication and development (11), species and domestication, or all three. Modules with particular relevance to fiber development are noted in column four. Those with relevance to fiber development, but also with equal relevance in other cell types, are also noted (i.e., …
	Module*	Gene Number	Functional Annotation	Relevant to fiber?
domestication	14	839	cytoskeleton (actin especially), cellular transport	Yes
	49*	102	none
	52	88	none
	57*	52	metal ion transport	Yes, and others
domestication and development	8	1954	DNA binding and hydrolase activity (glycosyl bonds)	Yes, and others
	15	837	none
	17	776	general cellular and metabolic processes
	25	412	DNA binding/processing
	34	186	Transport, especially protein transport	Yes
	35	181	DNA/RNA synthesis	Yes, and others
	37	177	DNA synthesis, ion transport	Yes, and others
	47	107	none
	53	88	none
	55	56	none
	58*	38	none
species, domestication, and development	1	11007	general cellular and metabolic processes
	2	10947	ROS management	Yes
	3	8306	ROS management, carbohydrate biosynthesis, transport	Yes
	6	3065	RNA biosynthesis, cell cycle regulation	Yes
	12	1061	protein signalling
	16	791	Autophagy	Yes
	20	667	none
	21	618	photosynthesis
	24	414	nutrient reservoir activity	Yes
	27	279	protein signalling and transport	Yes, and others
	29	238	none
	39	160	none
	45	122	none
	48	103	RNA synthesis	Yes, and others
species and domestication	7	2633	ROS managemnet, cytoskeleton, motor proteins	Yes
	9	1857	helicase activity
	18	707	none
	22	516	none
	30	230	none
	31	216	none
	32	204	Chromatin packaging
	36	179	none
	42	135	none
	43	133	ADP binding
	44	127	none
