# Supplementary material for: Domestication over Speciation in Allopolyploid Cotton Species: A Stronger Transcriptomic Pull
Source: Genes (Basel). 2023 Jun 20;14(6):1301. doi: 10.3390/genes14061301 (PMC10298526; doi:10.3390/genes14061301)
Supplement: Supplementary file 1 [file genes-14-01301-s001.zip › Supplementary Table S6.xlsx]

## Sheet: s3.module_annotation
Supplementary Table S6. List of which modules each gene belongs to, along with the annotation provided in Paterson (2012) for the genome sequence. Each gene is listed once, and the modules for each homoeolog are given under ME_A and ME_D, representing the maternal and paternal homoeologs, respectively.
gene	ME_A	ME_D	tair10.defline	pfam	panther	kog	kegg.ec	kegg.orthology	go	tair10	tair10.symbol
Gorai.001G000900	1	1	cell division control 2	PF00069	PTHR24056,PTHR24056:SF109	KOG0594	2.7.11.22	K02087	GO:0004672,GO:0005524,GO:0006468	AT3G48750.1	CDC2,CDC2A,CDC2AAT,CDK2,CDKA1,CDKA;1
Gorai.001G001100	1	1	SHK1 binding protein 1	PF05185	PTHR10738	KOG0822	2.1.1.125	K02516	GO:0008168,GO:0005737	AT4G31120.1	ATPRMT5,PRMT5,SKB1
Gorai.001G001300	1	1	Class II aminoacyl-tRNA and biotin synthetases superfamily protein	PF00152	PTHR22594:SF10,PTHR22594	KOG0556	6.1.1.12	K01876	GO:0000166,GO:0004812,GO:0005524,GO:0006418,GO:0005737,GO:0006412	AT4G31180.1
Gorai.001G004000	1	1	Leucine-rich repeat (LRR) family protein	PF08263	PTHR24420,PTHR24420:SF665	KOG0487				AT4G18670.1
Gorai.001G006300	1	1								AT1G55205.1
Gorai.001G007100	1	1	Pyridine nucleotide-disulphide oxidoreductase family protein	PF07992	PTHR11938:SF4,PTHR11938	KOG1800	1.18.1.2	K00528	GO:0016491,GO:0055114	AT4G32360.1
Gorai.001G009800	1	1	Protein of unknown function (DUF1005)	PF06219						AT4G29310.1
Gorai.001G009900	1	1	Zinc finger C-x8-C-x5-C-x3-H type family protein	PF00642	PTHR14493	KOG1595			GO:0003676,GO:0008270	AT4G29190.1
Gorai.001G010100	1	1	tRNA/rRNA methyltransferase (SpoU) family protein	PF08032,PF00588	PTHR12029:SF7,PTHR12029	KOG0838			GO:0003723,GO:0008173,GO:0006396,GO:0008168	AT2G19870.1
Gorai.001G010500	1	1	Regulator of Vps4 activity in the MVB pathway protein	PF03398	PTHR12161:SF4,PTHR12161	KOG2027				AT2G19710.1
Gorai.001G010600	1	1	Mitochondrial ATP synthase subunit G protein	PF04718	PTHR12386,PTHR12386:SF7				GO:0015078,GO:0015986,GO:0000276	AT4G29480.1
Gorai.001G010900	1	1								AT5G11780.1
Gorai.001G011500	1	1								AT1G55160.1
Gorai.001G014700	1	1	Ribosomal protein S3 family protein	PF00189,PF07650	PTHR11760	KOG3181		K02985	GO:0003735,GO:0006412,GO:0005622,GO:0005840,GO:0003723	AT5G35530.1
Gorai.001G015600	1	1	RING-box 1		PTHR11210	KOG2930				AT5G20570.1	ATRBX1,HRT1,RBX1,ROC1
Gorai.001G015700	1	1								AT5G20635.1
Gorai.001G017100	1	1	ARM repeat superfamily protein	PF08161	PTHR21576,PTHR21576:SF2	KOG1248				AT2G34357.1
Gorai.001G018300	1	1	Plant invertase/pectin methylesterase inhibitor superfamily	PF01095,PF04043	PTHR22931,PTHR22931:SF5		3.1.1.11	K01051	GO:0030599,GO:0042545,GO:0005618,GO:0004857	AT3G43270.1
Gorai.001G018400	1	1	Haloacid dehalogenase-like hydrolase (HAD) superfamily protein	PF06941					GO:0016791	AT4G33140.1
Gorai.001G019600	1	1	Chalcone-flavanone isomerase family protein	PF02431					GO:0016872,GO:0042398	AT2G26310.1
Gorai.001G020300	1	1	Duplicated homeodomain-like superfamily protein							AT1G76880.1
Gorai.001G020600	1	1	Duplicated homeodomain-like superfamily protein	PF00249	PTHR10641	KOG0048		K09422	GO:0003677	AT5G35550.1	ATMYB123,ATTT2,MYB123,TT2
Gorai.001G020900	1	1	mechanosensitive channel of small conductance-like 10	PF00924		KOG4629			GO:0055085,GO:0016020	AT5G12080.1	ATMSL10,MSL10
Gorai.001G023600	1	1		PF10258	PTHR13135	KOG3948				AT3G20430.1
Gorai.001G024900	1	1	ataurora1	PF00069	PTHR24350	KOG0580	2.7.11.1	K08850	GO:0004672,GO:0005524,GO:0006468	AT4G32830.1	AtAUR1,AUR1
Gorai.001G028000	1	1	aspartate aminotransferase 3	PF00155	PTHR11879	KOG1411			GO:0016740,GO:0030170,GO:0009058,GO:0016769,GO:0008483,GO:0006520	AT5G11520.1	ASP3,YLS4
Gorai.001G028800	1	1	Zinc-binding ribosomal protein family protein	PF01907	PTHR10768	KOG3475			GO:0003735,GO:0006412,GO:0005622,GO:0005840	AT3G16080.1
Gorai.001G029600	1	1	pyrroline-5- carboxylate (P5C) reductase	PF03807	PTHR11645	KOG3124	1.5.1.2	K00286	GO:0016616,GO:0051287,GO:0046168,GO:0055114,GO:0005737,GO:0004616,GO:0006098,GO:0016491,GO:0006561,GO:0004735	AT5G14800.1	AT-P5C1,AT-P5R,EMB2772,P5CR
Gorai.001G032300	1	1	Cytosol aminopeptidase family protein	PF02789,PF00883	PTHR11963	KOG2597	3.4.11.1	K01255	GO:0004177,GO:0006508,GO:0005622	AT4G30920.1
Gorai.001G032600	1	1	alpha/beta-Hydrolases superfamily protein	PF00450	PTHR11802,PTHR11802:SF8	KOG1282			GO:0004185,GO:0006508	AT4G30610.1	BRS1,SCPL24
Gorai.001G035100	1	1	Protein of unknown function (DUF2012)	PF09430	PTHR13605	KOG3306				AT2G25310.1
Gorai.001G035500	1	1								AT5G25265.1
Gorai.001G036000	1	1	aberrant lateral root formation 4	PF08568						AT5G11030.2	ALF4
Gorai.001G037200	1	1			PTHR12663					AT4G31880.1
Gorai.001G038600	1	1	glutathione peroxidase 1	PF00255	PTHR11592	KOG1651	1.11.1.9	K00432	GO:0004602,GO:0006979,GO:0055114,GO:0016209,GO:0016491	AT2G25080.1	ATGPX1,GPX1
Gorai.001G038700	1	1	ubiquitin-specific protease 22	PF00443,PF02148	PTHR24006,PTHR24006:SF57	KOG1867	3.1.2.15	K11366	GO:0004221,GO:0006511,GO:0008270	AT5G10790.1	UBP22
Gorai.001G040500	1	1	Cellulose-synthase-like C5	PF00535	PTHR10587,PTHR10587:SF18					AT4G31590.1	ATCSLC05,ATCSLC5,CSLC05,CSLC5
Gorai.001G040700	1	1	Zinc finger (CCCH-type) family protein	PF00642	PTHR12547:SF44,PTHR12547				GO:0003676,GO:0008270	AT3G19360.1
Gorai.001G041400	1	1	Protein kinase superfamily protein	PF01633	PTHR22603:SF16,PTHR22603	KOG4720			GO:0016773	AT2G26830.1	emb1187
Gorai.001G041600	1	1	ribosome biogenesis regulatory protein (RRS1) family protein	PF04939	PTHR17602	KOG1765			GO:0042254,GO:0005634	AT2G37990.1
Gorai.001G044200	1	1	Protein kinase superfamily protein	PF07714	PTHR24420,PTHR24420:SF661	KOG1187			GO:0004672,GO:0005524,GO:0006468	AT3G01300.1
Gorai.001G044300	1	1	Calcium-binding EF-hand family protein	PF00036	PTHR10891,PTHR10891:SF141	KOG0027			GO:0005509,GO:0007165,GO:0005578	AT2G43290.1	MSS3
Gorai.001G046200	1	1	Ribosomal protein S10p/S20e family protein	PF00338	PTHR11700	KOG0900		K02969	GO:0003735,GO:0006412,GO:0005622,GO:0005840	AT3G47370.1
Gorai.001G046600	1	1	rRNA processing protein-related	PF05890	PTHR13028	KOG3080				AT3G22660.1
Gorai.001G049600	1	1	Ribosomal protein L23/L15e family protein	PF00827	PTHR11847	KOG1678		K02877	GO:0003735,GO:0006412,GO:0005840,GO:0005622	AT4G16720.1
Gorai.001G050800	1	1	ubiquinol-cytochrome C chaperone family protein	PF03981	PTHR12184	KOG2873				AT5G51220.1
Gorai.001G051600	1	1	S-adenosyl-L-methionine-dependent methyltransferases superfamily protein	PF10672	PTHR11061				GO:0016740,GO:0008168,GO:0031167,GO:0008276,GO:0006479,GO:0005737	AT1G54310.2
Gorai.001G053400	1	1	calnexin 1	PF00262	PTHR11073	KOG0675		K08054	GO:0005509	AT5G61790.1	ATCNX1,CNX1
Gorai.001G053500	1	1	Mitochondrial substrate carrier family protein	PF00153	PTHR24089:SF34,PTHR24089	KOG0036				AT5G51050.1
Gorai.001G053700	1	1		PF03937	PTHR12469,PTHR12469:SF1	KOG3326				AT5G51040.1
Gorai.001G054000	1	1								AT5G61865.1
Gorai.001G054100	1	1	transducin family protein / WD-40 repeat family protein	PF00400	PTHR22850,PTHR22850:SF45	KOG0265			GO:0005515	AT5G50970.1
Gorai.001G054500	1	1	signal recognition particle-related / SRP-related		PTHR12860	KOG2460		K03107		AT5G61970.1
Gorai.001G055100	1	1	Ribosomal L32p protein family	PF01783					GO:0003735,GO:0006412,GO:0015934	AT1G26740.1
Gorai.001G056300	1	1	Ribosomal protein L7Ae/L30e/S12e/Gadd45 family protein	PF01248	PTHR23105:SF1,PTHR23105	KOG3166		K02936		AT3G62870.1
Gorai.001G058500	1	1	nuclear factor Y, subunit C1	PF00808	PTHR10252	KOG1657			GO:0003677,GO:0043565,GO:0005622	AT3G48590.1	ATHAP5A,HAP5A,NF-YC1
Gorai.001G059600	1	1	RNA-metabolising metallo-beta-lactamase family protein	PF00753,PF07521	PTHR11203:SF24,PTHR11203	KOG1137			GO:0016787	AT5G63420.1	emb2746
Gorai.001G059900	1	1	arginosuccinate synthase family	PF00764	PTHR11587	KOG1706	6.3.4.5	K01940	GO:0004055,GO:0005524,GO:0006526	AT4G24830.1
Gorai.001G061300	1	1	Ribosomal protein S21 family protein	PF01165					GO:0003735,GO:0006412,GO:0005622,GO:0005840	AT3G27160.1	GHS1
Gorai.001G061900	1	1	relative of early flowering 6	PF02375,PF02373	PTHR10694,PTHR10694:SF8				GO:0005515	AT3G48430.1	REF6
Gorai.001G062200	1	1	AAA-type ATPase family protein	PF12169,PF00004	PTHR11669	KOG0989			GO:0005524,GO:0003887	AT4G24790.1
Gorai.001G062900	1	1		PF08213						AT5G63150.1
Gorai.001G063000	1	1	protein-l-isoaspartate methyltransferase 1	PF01135	PTHR11579	KOG1661			GO:0004719,GO:0006464	AT3G48330.1	ATPIMT1,PIMT1
Gorai.001G063100	1	1	31-kDa RNA binding protein	PF00076	PTHR24012,PTHR24012:SF56	KOG0131			GO:0003676	AT4G24770.1	ATRBP31,ATRBP33,CP31,RBP31
Gorai.001G064300	1	1	Ribosomal protein L19 family protein	PF01245	PTHR15680,PTHR15680:SF2				GO:0003735,GO:0006412,GO:0005622,GO:0005840	AT4G11630.1
Gorai.001G064500	1	1	Leucine-rich repeat (LRR) family protein	PF00560	PTHR24420	KOG0617			GO:0005515	AT1G13230.1
Gorai.001G064600	1	1	P-loop containing nucleoside triphosphate hydrolases superfamily protein	PF00271,PF00270	PTHR24031,PTHR24031:SF23	KOG0342	3.6.4.13	K13179	GO:0003676,GO:0005524,GO:0008026,GO:0004386	AT3G18600.1
Gorai.001G065800	1	1	Ribosomal protein L7Ae/L30e/S12e/Gadd45 family protein	PF01248	PTHR23105,PTHR23105:SF12	KOG3167		K11129		AT5G08180.1
Gorai.001G066800	1	1	BSD domain-containing protein	PF03909						AT1G26300.1
Gorai.001G067100	1	1	18S pre-ribosomal assembly protein gar2-related							AT2G03810.1
Gorai.001G067900	1	1	UDP-Glycosyltransferase superfamily protein	PF04101,PF03033	PTHR21015:SF22,PTHR21015		2.4.1.227	K02563	GO:0016758,GO:0005975,GO:0030259,GO:0030246	AT1G73740.1
Gorai.001G068300	1	1	white-brown complex homolog protein 11	PF01061,PF00005	PTHR19241,PTHR19241:SF20	KOG0061			GO:0005524,GO:0016887,GO:0016020	AT1G17840.1	ABCG11,ATWBC11,COF1,DSO,WBC11
Gorai.001G068500	1	1		PF05160
Gorai.001G069100	1	1	Ribosomal L28 family	PF00830	PTHR13528	KOG3278			GO:0003735,GO:0006412,GO:0005622,GO:0005840	AT4G31460.1
Gorai.001G069200	1	1	FKBP-type peptidyl-prolyl cis-trans isomerase family protein	PF00254	PTHR10516,PTHR10516:SF71	KOG0543			GO:0006457	AT3G21640.1	ATFKBP42,FKBP42,TWD1,UCU2
Gorai.001G069800	1	1	receptor for activated C kinase 1B	PF00400	PTHR19868	KOG0279			GO:0005515	AT1G48630.1	RACK1B_AT
Gorai.001G070900	1	1								AT1G28150.1
Gorai.001G071200	1	1	aldehyde dehydrogenase 10A8	PF00171	PTHR11699,PTHR11699:SF45	KOG2450	1.2.1.8	K00130	GO:0016491,GO:0008152,GO:0055114	AT1G74920.1	ALDH10A8
Gorai.001G071700	1	1	embryo defective 2759							AT5G63050.1	EMB2759
Gorai.001G072600	1	1	fucosyltransferase 1	PF03254			2.4.1.-	K13681	GO:0008107,GO:0042546,GO:0016020	AT2G03220.1	ATFT1,ATFUT1,FT1,MUR2
Gorai.001G075600	1	1	Adenine nucleotide alpha hydrolases-like superfamily protein	PF00582					GO:0006950	AT5G17390.1
Gorai.001G076000	1	1	Transducin/WD40 repeat-like superfamily protein	PF00400	PTHR22840:SF3,PTHR22840	KOG0640		K14406	GO:0005515	AT5G60940.1
Gorai.001G076100	1	1
Gorai.001G076600	1	1								AT1G74160.1
Gorai.001G076900	1	1	PLC-like phosphodiesterases superfamily protein	PF03009	PTHR23344	KOG2258	3.1.4.46	K01126	GO:0008889,GO:0006071	AT1G74210.1
Gorai.001G077000	1	1	glycine-rich RNA-binding protein 3	PF00076	PTHR24012				GO:0003676	AT5G61030.1	GR-RBP3
Gorai.001G079800	1	1	ARM repeat superfamily protein	PF08389,PF03810	PTHR12363,PTHR12363:SF19	KOG2081			GO:0008565,GO:0006886	AT5G62600.1
Gorai.001G081600	1	1	ammonium transporter 1;2	PF00909	PTHR11730:SF8,PTHR11730	KOG0682			GO:0072488,GO:0016020,GO:0008519	AT1G64780.1	AMT1;2,ATAMT1;2
Gorai.001G082800	1	1	Tetratricopeptide repeat (TPR)-like superfamily protein	PF00515	PTHR24559:SF32,PTHR24559				GO:0005515	AT5G37590.1
Gorai.001G083300	1	1	expansin A13	PF01357,PF03330						AT3G03220.1	ATEXP13,ATEXPA13,ATHEXP ALPHA 1.22,EXP13,EXPA13
Gorai.001G086600	1	1	plastid movement impaired 2							AT1G66480.1	PMI2
Gorai.001G087100	1	1	calmodulin like 23	PF00036	PTHR10891:SF39,PTHR10891	KOG0027		K13448		AT1G66400.1	CML23
Gorai.001G092900	1	1	Ribosomal L27e protein family	PF01777,PF00467	PTHR10497	KOG3418		K02901	GO:0003735,GO:0006412,GO:0005622,GO:0005840	AT4G15000.1
Gorai.001G093800	1	1	breast basic conserved 1	PF01294	PTHR11722	KOG3295			GO:0003735,GO:0006412,GO:0005622,GO:0005840	AT3G49010.1	ATBBC1,BBC1,RSU2
Gorai.001G094500	1	1	Protein of unknown function (DUF1068)	PF06364	PTHR17695					AT1G05070.1
Gorai.001G095000	1	1	embryo defective 1381							AT2G31340.1	emb1381
Gorai.001G095900	1	1
Gorai.001G096000	1	1	chitin elicitor receptor kinase 1	PF07714	PTHR24420:SF421,PTHR24420	KOG1187			GO:0004672,GO:0005524,GO:0006468	AT3G21630.1	CERK1,LYSM RLK1
Gorai.001G096100	1	1	ribosomal protein S27	PF01667	PTHR11594	KOG1779		K02978	GO:0003735,GO:0006412,GO:0005622,GO:0005840	AT3G61110.1	ARS27A,RS27A
Gorai.001G098400	1	1	Kinase-related protein of unknown function (DUF1296)	PF06972	PTHR12758,PTHR12758:SF13					AT3G07660.1
Gorai.001G102900	1	1	Ribosomal protein L32e	PF01655	PTHR23413	KOG0878		K02912	GO:0003735,GO:0006412,GO:0005622,GO:0005840	AT4G18100.1
Gorai.001G107600	1	1	ribosomal protein L23AB	PF00276,PF03939	PTHR11620	KOG1751			GO:0003735,GO:0006412,GO:0005840,GO:0005622	AT3G55280.1	RPL23AB
Gorai.001G108200	1	1	ribosomal protein S15A	PF00410	PTHR11758	KOG1754		K02957	GO:0003735,GO:0006412,GO:0005622,GO:0005840	AT1G07770.1	RPS15A
Gorai.001G109200	1	1	lysophosphatidyl acyltransferase 2		PTHR10983,PTHR10983:SF1					AT3G57650.1	LPAT2
Gorai.001G110500	1	1	Fasciclin-like arabinogalactan family protein	PF02469	PTHR10900:SF23,PTHR10900					AT3G46550.1	SOS5
Gorai.001G113000	1	1	RAB GTPase homolog A2B	PF00071	PTHR24073,PTHR24073:SF213	KOG0087		K07976	GO:0003924,GO:0005525,GO:0007264,GO:0005622	AT1G07410.1	ATRAB-A2B,ATRABA2B,RAB-A2B,RABA2b
Gorai.001G115200	1	1	zinc finger (C2H2 type) family protein							AT2G29660.1
Gorai.001G116200	1	1	Arabidopsis thaliana protein of unknown function (DUF821)	PF05686	PTHR12203:SF11,PTHR12203	KOG2458				AT1G07220.1
Gorai.001G118100	1	1	geranyl diphosphate synthase 1	PF00348	PTHR12001,PTHR12001:SF19	KOG0776			GO:0008299	AT2G34630.2	GPPS,GPS1
Gorai.001G118800	1	1	Lecithin:cholesterol acyltransferase family protein	PF02450	PTHR11440,PTHR11440:SF6				GO:0008374,GO:0006629,GO:0004607	AT3G44830.1
Gorai.001G118900	1	1	UDP-D-apiose/UDP-D-xylose synthase 2	PF01370	PTHR10366,PTHR10366:SF147	KOG1429		K12449	GO:0003854,GO:0016616,GO:0006694,GO:0055114,GO:0003824,GO:0050662,GO:0044237,GO:0009058	AT1G08200.1	AXS2
Gorai.001G119000	1	1	Phototropic-responsive NPH3 family protein	PF03000	PTHR13690:SF174,PTHR13690				GO:0004871,GO:0009416	AT3G44820.1
Gorai.001G119800	1	1	nucleobase-ascorbate transporter 12	PF00860	PTHR11119,PTHR11119:SF8	KOG1292			GO:0005215,GO:0006810,GO:0055085,GO:0016020	AT2G27810.1	ATNAT12,NAT12
Gorai.001G121200	1	1	Jojoba acyl CoA reductase-related male sterility protein	PF07993,PF03015	PTHR11011,PTHR11011:SF1	KOG1221			GO:0003854,GO:0016616,GO:0006694,GO:0055114,GO:0003824,GO:0050662,GO:0044237,GO:0016620	AT4G33790.1	CER4,FAR3,G7
Gorai.001G121300	1	1	Tetratricopeptide repeat (TPR)-like superfamily protein	PF01535	PTHR24015,PTHR24015:SF154					AT2G27610.1
Gorai.001G123700	1	1	ovate family protein 13	PF04844						AT5G04820.1	ATOFP13,OFP13
Gorai.001G124600	1	1		PF05291	PTHR12821	KOG3871				AT1G31660.1
Gorai.001G126400	1	1	MD-2-related lipid recognition domain-containing protein / ML domain-containing protein	PF02221	PTHR11306	KOG4680				AT3G11780.1
Gorai.001G126900	1	1	strictosidine synthase-like 3	PF03088	PTHR10426:SF5,PTHR10426	KOG1520			GO:0016844,GO:0009058	AT1G08470.1	SSL3
Gorai.001G129300	1	1								AT5G60150.1
Gorai.001G130700	1	1	GTP binding Elongation factor Tu family protein	PF00009,PF03144,PF03143	PTHR23115:SF57,PTHR23115	KOG0052	3.6.5.3	K03231	GO:0003924,GO:0005525	AT1G07930.1
Gorai.001G132100	1	1	vacuolar protein sorting 26B	PF03643	PTHR12233	KOG3063			GO:0007034,GO:0030904	AT4G27690.1	VPS26B
Gorai.001G132200	1	1	CBL-interacting protein kinase 3	PF03822,PF00069	PTHR24345,PTHR24345:SF45	KOG0583			GO:0004672,GO:0005524,GO:0006468,GO:0007165	AT2G26980.4	CIPK3,SnRK3.17
Gorai.001G132400	1	1	proteasome family protein	PF01399	PTHR10678	KOG1464		K12176	GO:0005515	AT2G26990.1	ATCSN2,COP12,CSN2,FUS12
Gorai.001G132600	1	1	Ribosomal protein L30/L7 family protein	PF00327,PF08079	PTHR11524	KOG3184		K02937	GO:0003735,GO:0006412,GO:0005840	AT3G13580.1
Gorai.001G134400	1	1	Tetratricopeptide repeat (TPR)-like superfamily protein	PF01535	PTHR24015,PTHR24015:SF20					AT5G01110.1
Gorai.001G137100	1	1	RNA-binding (RRM/RBD/RNP motifs) family protein	PF00076,PF00642	PTHR24009				GO:0003676,GO:0008270	AT3G21100.2
Gorai.001G138000	1	1	calcium-dependent protein kinase 19	PF00069,PF00036	PTHR24349,PTHR24349:SF13	KOG0032	2.7.11.1	K13412	GO:0004672,GO:0005524,GO:0006468	AT5G19450.1	CDPK19,CPK8
Gorai.001G138300	1	1	CCCH-type zinc finger protein with ARM repeat domain	PF00023	PTHR14493,PTHR14493:SF22	KOG1595			GO:0005515	AT5G12850.1
Gorai.001G138400	1	1	Pentatricopeptide repeat (PPR) superfamily protein	PF01535	PTHR24015					AT4G13650.1
Gorai.001G142300	1	1	importin alpha isoform 1	PF00514,PF01749	PTHR23316	KOG0166			GO:0005515,GO:0008565,GO:0006606,GO:0005634,GO:0005737,GO:0006886,GO:0005643	AT3G06720.1	AIMP ALPHA,AT-IMP,ATKAP ALPHA,IMPA-1,IMPA1
Gorai.001G142800	1	1	Haloacid dehalogenase-like hydrolase (HAD) superfamily protein	PF00702	PTHR12725:SF15,PTHR12725	KOG3109			GO:0003824,GO:0008152	AT2G32150.1
Gorai.001G149800	1	1	Ribosomal RNA processing Brix domain protein	PF04427	PTHR22734	KOG2780				AT4G01560.1	MEE49
Gorai.001G150600	1	1	60S acidic ribosomal protein family	PF00428	PTHR21141	KOG1762		K02942	GO:0003735,GO:0006414,GO:0005622,GO:0005840	AT5G24510.1
Gorai.001G150700	1	1	RNA-binding (RRM/RBD/RNP motifs) family protein	PF00076	PTHR24011,PTHR24011:SF218	KOG0149			GO:0003676	AT2G46780.1
Gorai.001G154000	1	1	cellular apoptosis susceptibility protein, putative / importin-alpha re-exporter, putative	PF08506,PF08389,PF03378,PF03810	PTHR10997:SF8,PTHR10997	KOG1992			GO:0005515,GO:0008565,GO:0006886,GO:0008283,GO:0008262,GO:0005737,GO:0005634	AT2G46520.1
Gorai.001G155600	1	1	Histone superfamily protein	PF00125	PTHR11426,PTHR11426:SF4	KOG1745		K11253	GO:0003677,GO:0006334,GO:0000786	AT1G01370.1	CENH3,HTR12
Gorai.001G157500	1	1	RING/U-box superfamily protein	PF00097	PTHR14155:SF24,PTHR14155					AT3G61550.1
Gorai.001G157900	1	1	Reticulon family protein	PF02453	PTHR10994	KOG1792			GO:0005783	AT2G46170.1
Gorai.001G158800	1	1	MAP kinase 4	PF00069	PTHR24055,PTHR24055:SF69	KOG0660	2.7.11.24	K04371	GO:0004672,GO:0005524,GO:0006468	AT4G01370.1	ATMPK4,MPK4
Gorai.001G168500	1	1								AT2G46000.1
Gorai.001G169600	1	1	Ribosomal protein L36e family protein	PF01158	PTHR10114	KOG3452		K02920	GO:0003735,GO:0006412,GO:0005622,GO:0005840	AT3G53740.2
Gorai.001G170700	1	1	NAD-dependent malic enzyme 2	PF00390,PF03949	PTHR23406:SF2,PTHR23406	KOG1257	1.1.1.39	K00028	GO:0016616,GO:0055114,GO:0051287	AT4G00570.1	NAD-ME2
Gorai.001G171000	1	1	Homeobox-leucine zipper family protein / lipid-binding START domain-containing protein	PF01852,PF00046	PTHR24325:SF193,PTHR24325	KOG0484		K09338	GO:0003700,GO:0043565,GO:0006355	AT4G00730.1	AHDP,ANL2
Gorai.001G171100	1	1
Gorai.001G174000	1	1	NAD(P)-binding Rossmann-fold superfamily protein	PF01370	PTHR10366,PTHR10366:SF9	KOG1502			GO:0003854,GO:0016616,GO:0006694,GO:0055114,GO:0003824,GO:0050662,GO:0044237,GO:0009058	AT2G45400.1	BEN1
Gorai.001G174200	1	1	ribosomal protein S13A	PF00312,PF08069	PTHR11885	KOG0400			GO:0003735,GO:0006412,GO:0005622,GO:0005840	AT4G00100.1	ATRPS13A,PFL2,RPS13,RPS13A
Gorai.001G176000	1	1	squamosa promoter binding protein-like 8	PF03110					GO:0003677,GO:0005634	AT1G02065.1	SPL8
Gorai.001G176200	1	1	Translation elongation factor EFG/EF2 protein	PF03144,PF00679,PF03764,PF00009	PTHR23115,PTHR23115:SF13	KOG0465	3.6.5.3	K02355	GO:0003924,GO:0005525	AT1G45332.1
Gorai.001G179000	1	1	ribophorin II (RPN2) family protein	PF05817	PTHR12640	KOG2447			GO:0004579,GO:0018279,GO:0005789,GO:0008250	AT4G21150.1	HAP6
Gorai.001G179300	1	1	casein kinase I-like 6	PF00069	PTHR11909:SF18,PTHR11909	KOG1163			GO:0004672,GO:0005524,GO:0006468	AT4G28540.1	CKL6,PAPK1
Gorai.001G180400	1	1	HAD superfamily, subfamily IIIB acid phosphatase	PF03767	PTHR11726,PTHR11726:SF1				GO:0003993	AT1G04040.1
Gorai.001G180500	1	1		PF11107						AT5G44010.1
Gorai.001G181600	1	1	Nuclear transport factor 2 (NTF2) family protein with RNA binding (RRM-RBD-RNP motifs) domain	PF00076,PF02136	PTHR10693:SF8,PTHR10693	KOG0116			GO:0003676,GO:0006810,GO:0005622	AT5G43960.1
Gorai.001G183600	1	1
Gorai.001G183700	1	1
Gorai.001G186200	1	1	GTP-binding family protein	PF08701,PF01926	PTHR11089:SF14,PTHR11089	KOG2484		K14538	GO:0005525,GO:0015093,GO:0015684,GO:0016021,GO:0005622	AT3G07050.1
Gorai.001G191600	1	1	Sterile alpha motif (SAM) domain-containing protein	PF07647					GO:0005515	AT3G07760.1
Gorai.001G193100	1	1	RNA-binding (RRM/RBD/RNP motifs) family protein	PF00076	PTHR24012:SF14,PTHR24012	KOG4205			GO:0003676	AT3G07810.1
Gorai.001G197300	1	1	Root hair defective 3 GTP-binding protein (RHD3)							AT3G13870.1	RHD3
Gorai.001G197800	1	1	breast basic conserved 1	PF01294	PTHR11722	KOG3295			GO:0003735,GO:0006412,GO:0005622,GO:0005840	AT3G49010.1	ATBBC1,BBC1,RSU2
Gorai.001G198400	1	1	Pyridoxal phosphate (PLP)-dependent transferases superfamily protein	PF00266	PTHR21152:SF1,PTHR21152	KOG2790	2.6.1.52	K00831	GO:0008152	AT2G17630.1
Gorai.001G201400	1	1	general regulatory factor 3	PF00244	PTHR18860	KOG0841		K06630	GO:0019904	AT5G38480.1	GRF3,RCI1
Gorai.001G202100	1	1	Dihydrodipicolinate reductase, bacterial/plant	PF01113,PF05173	PTHR20836		1.3.1.26	K00215	GO:0008839,GO:0009089,GO:0055114,GO:0070402	AT3G59890.1
Gorai.001G203900	1	1	receptor-like kinase 1	PF00069,PF00560,PF08263	PTHR24420,PTHR24420:SF537	KOG1187			GO:0004672,GO:0005524,GO:0006468,GO:0005515	AT1G48480.1	RKL1
Gorai.001G204600	1	1		PF09184	PTHR16487					AT5G17070.1
Gorai.001G204700	1	1	eukaryotic release factor 1-3	PF03463,PF03465,PF03464	PTHR10113	KOG0688		K03265	GO:0016149,GO:0006415,GO:0005737	AT3G26618.1	ERF1-3
Gorai.001G204800	1	1	alpha/beta-Hydrolases superfamily protein	PF03893,PF01764	PTHR21493,PTHR21493:SF1	KOG2088			GO:0004806,GO:0006629,GO:0004091,GO:0016042	AT5G37710.1
Gorai.001G204900	1	1	O-Glycosyl hydrolases family 17 protein	PF00332,PF07983	PTHR16631:SF1,PTHR16631				GO:0004553,GO:0005975	AT1G66250.1
Gorai.001G206300	1	1	O-fucosyltransferase family protein	PF10250						AT5G15740.1
Gorai.001G211400	1	1	Ribosomal protein L18ae/LX family protein	PF01775	PTHR10052	KOG0829		K02882	GO:0003735,GO:0006412,GO:0005840	AT2G34480.1
Gorai.001G213400	1	1	Ribosomal L27e protein family	PF01777,PF00467	PTHR10497	KOG3418			GO:0003735,GO:0006412,GO:0005622,GO:0005840	AT4G15000.1
Gorai.001G214700	1	1	Pentatricopeptide repeat (PPR) superfamily protein	PF01535	PTHR24015:SF62,PTHR24015					AT4G14850.1	LOI1,MEF11
Gorai.001G215000	1	1	Cell differentiation, Rcd1-like protein	PF04078	PTHR12262	KOG3036				AT3G20800.1
Gorai.001G215500	1	1	ERD (early-responsive to dehydration stress) family protein	PF02714	PTHR13018:SF5,PTHR13018	KOG1134			GO:0016020	AT3G21620.1
Gorai.001G216200	1	1	Lycopene beta/epsilon cyclase protein	PF05834	PTHR13847:SF34,PTHR13847			K14606	GO:0016705,GO:0016117	AT2G32640.1
Gorai.001G217300	1	1	cytochrome P450, family 72, subfamily A, polypeptide 9	PF00067	PTHR24282:SF174,PTHR24282	KOG0157			GO:0005506,GO:0009055,GO:0016705,GO:0020037,GO:0055114	AT3G14630.1	CYP72A9
Gorai.001G218000	1	1	GDSL-like Lipase/Acylhydrolase superfamily protein	PF00657	PTHR22835,PTHR22835:SF39				GO:0016788,GO:0006629	AT2G42990.1
Gorai.001G220600	1	1	HEAT SHOCK PROTEIN 89.1	PF02518,PF00183	PTHR11528:SF29,PTHR11528	KOG0019			GO:0005524,GO:0051082,GO:0006457,GO:0006950	AT3G07770.1	AtHsp90-6,AtHsp90.6,Hsp89.1
Gorai.001G229200	1	1	RAB GTPase homolog A5E	PF00071	PTHR24073,PTHR24073:SF213	KOG0087		K07976	GO:0005525,GO:0007264,GO:0005622	AT1G05810.1	ARA,ARA-1,ATRAB11D,ATRABA5E,RABA5E
Gorai.001G229300	1	1	Auxin-responsive family protein	PF03188,PF04526	PTHR23130,PTHR23130:SF18	KOG4293			GO:0016021	AT3G25290.1
Gorai.001G231400	1	1	TCV-interacting protein	PF02365					GO:0003677,GO:0006355	AT5G24590.2	ANAC091,TIP
Gorai.001G231600	1	1	dolichol-phosphate mannosyltransferase-related	PF08285	PTHR16433			K09659		AT1G48140.1
Gorai.001G233900	1	1	cytochrome B5 isoform B	PF00173	PTHR19359	KOG0537			GO:0020037	AT2G32720.1	ATCB5-B,B5 #4,CB5-B
Gorai.001G235600	1	1	Protein of unknown function (DUF3741)	PF12552	PTHR21726,PTHR21726:SF7					AT4G28760.1
Gorai.001G235700	1	1								AT2G20250.1
Gorai.001G237600	1	1	translocase of outer membrane 22-V		PTHR12504					AT5G43970.1	ATTOM22-V,TOM22-V,TOM9-2
Gorai.001G238300	1	1	peptide transporter 3	PF00854	PTHR11654:SF37,PTHR11654	KOG1237			GO:0005215,GO:0006857,GO:0016020	AT5G46050.1	ATPTR3,PTR3
Gorai.001G239000	1	1	myb domain protein 30	PF00249	PTHR10641	KOG0048		K09422	GO:0003677	AT3G28910.1	ATMYB30,MYB30
Gorai.001G239500	1	1	mitogen-activated protein kinase kinase kinase 7	PF00069	PTHR24361,PTHR24361:SF61				GO:0004672,GO:0005524,GO:0006468	AT3G13530.1	MAP3KE1,MAPKKK7
Gorai.001G242800	1	1	AUX/IAA transcriptional regulator family protein	PF02309					GO:0006355,GO:0005634	AT5G43700.1	ATAUX2-11,IAA4
Gorai.001G243700	1	1	basic pentacysteine 4	PF06217						AT2G21240.1	ATBPC4,BBR,BPC4
Gorai.001G243900	1	1	FMN-linked oxidoreductases superfamily protein	PF01207	PTHR11082,PTHR11082:SF8	KOG2333	1.-.-.-	K05544	GO:0017150,GO:0050660,GO:0008033,GO:0055114	AT4G38890.1
Gorai.001G247100	1	1	prenylated RAB acceptor 1.A1	PF03208	PTHR12859	KOG4050				AT5G02040.1	PRA1.A1
Gorai.001G248100	1	1	importin alpha isoform 9	PF00514	PTHR23316	KOG0166			GO:0005515	AT5G03070.1	IMPA-9
Gorai.001G248200	1	1	IQ-domain 2		PTHR10699:SF9,PTHR10699					AT5G03040.1	iqd2
Gorai.001G248300	1	1	Ribosomal protein S12/S23 family protein	PF00164	PTHR11652	KOG1749		K02973	GO:0003735,GO:0006412,GO:0005622,GO:0005840	AT5G02960.1
Gorai.001G248800	1	1	Ribosomal protein S24e family protein							AT5G02740.1
Gorai.001G253500	1	1			PTHR21531	KOG2637				AT3G49990.1
Gorai.001G253600	1	1	Protein of unknown function, DUF647	PF04884	PTHR12770,PTHR12770:SF5	KOG4249				AT2G31190.2	RUS2,WXR1
Gorai.001G255000	1	1	Ypt/Rab-GAP domain of gyp1p superfamily protein	PF00566	PTHR22957:SF30,PTHR22957	KOG2197			GO:0005097,GO:0032313,GO:0005622	AT4G28550.1
Gorai.001G256800	1	1	voltage dependent anion channel 1	PF01459	PTHR11743,PTHR11743:SF14	KOG3126		K05862	GO:0008308,GO:0006820,GO:0044070,GO:0055085,GO:0005741	AT3G01280.1	ATVDAC1,VDAC1
Gorai.001G259400	1	1	Peroxidase superfamily protein	PF00141			1.11.1.7	K00430	GO:0004601,GO:0020037,GO:0006979,GO:0055114	AT5G40150.1
Gorai.001G259600	1	1	transferases;sulfuric ester hydrolases;catalytics;transferases	PF00884,PF04987	PTHR12250	KOG2124			GO:0008484,GO:0008152,GO:0003824,GO:0016740,GO:0006506,GO:0005789	AT3G01380.1
Gorai.001G259700	1	1	Gibberellin-regulated family protein	PF02704						AT5G14920.1
Gorai.001G260400	1	1	5\'-3\' exonuclease family protein	PF00752,PF00867	PTHR11081,PTHR11081:SF1				GO:0004518,GO:0006281,GO:0006289,GO:0005634,GO:0004519,GO:0003697	AT3G28030.1	UVH3,UVR1
Gorai.001G260700	1	1	RING/U-box superfamily protein	PF00097	PTHR14155,PTHR14155:SF26	KOG1493				AT5G40250.1
Gorai.001G262100	1	1	GDSL-like Lipase/Acylhydrolase superfamily protein	PF00657	PTHR22835,PTHR22835:SF39				GO:0016788,GO:0006629	AT3G27950.1
Gorai.001G263100	1	1	ribosomal protein L12-A	PF00542	PTHR11809:SF14,PTHR11809	KOG1715			GO:0003735,GO:0006412,GO:0005622,GO:0005840	AT3G27830.1	RPL12,RPL12-A
Gorai.001G264700	1	1	pescadillo-related	PF00533,PF06732	PTHR12221	KOG2481			GO:0005622,GO:0042254,GO:0005730,GO:0008283	AT5G14520.1
Gorai.001G264800	1	1	Ribosomal S17 family protein	PF00833	PTHR10732	KOG0187		K02962	GO:0003735,GO:0006412,GO:0005622,GO:0005840	AT5G04800.1
Gorai.001G266600	1	1	GDSL-like Lipase/Acylhydrolase superfamily protein	PF00657	PTHR22835,PTHR22835:SF39				GO:0016788,GO:0006629	AT5G14450.1
Gorai.001G270100	1	1	uridine kinase/uracil phosphoribosyltransferase 1	PF00156,PF00485	PTHR10285	KOG4203	2.7.1.48	K00876	GO:0009116,GO:0005524,GO:0016301,GO:0008152	AT5G40870.1	ATUK/UPRT1,UK/UPRT1,UKL1
Gorai.001G271600	1	1	secE/sec61-gamma protein transport protein	PF00584	PTHR12309	KOG3498		K07342	GO:0006605,GO:0006886,GO:0016020	AT5G50460.1
Gorai.001G275700	1	1	Aspartate kinase family protein	PF01842,PF00696	PTHR21499:SF11,PTHR21499	KOG0456	2.7.2.4	K00928	GO:0008652,GO:0016597,GO:0008152	AT5G14060.1	CARAB-AK-LYS
Gorai.001G275800	1	1								AT2G31410.1
Gorai.002G001200	1	1	Acyl transferase/acyl hydrolase/lysophospholipase superfamily protein	PF01734	PTHR12406:SF1,PTHR12406	KOG3773			GO:0006629	AT1G33270.1
Gorai.002G002200	1	1	transportin 1	PF03810,PF02985	PTHR10527:SF3,PTHR10527	KOG2023			GO:0005515,GO:0008565,GO:0006886	AT2G16950.2	ATTRN1,TRN1
Gorai.002G003400	1	1	Cyclophilin-like peptidyl-prolyl cis-trans isomerase family protein	PF00160	PTHR11071,PTHR11071:SF57	KOG0880			GO:0003755,GO:0006457	AT4G34960.1
Gorai.002G004800	1	1	vacuolar proton ATPase A3	PF01496	PTHR11629,PTHR11629:SF11	KOG2189			GO:0015078,GO:0015991,GO:0033177	AT4G39080.1	VHA-A3
Gorai.002G005200	1	1	thymidylate synthase 1	PF00303,PF00186	PTHR11549:SF2,PTHR11549	KOG0673	1.5.1.3,2.1.1.45	K13998	GO:0004146,GO:0006545,GO:0009165,GO:0055114,GO:0004799,GO:0006231	AT2G16370.1	THY-1
Gorai.002G005300	1	1	Ribosomal protein S25 family protein	PF03297	PTHR12850,PTHR12850:SF8	KOG1767		K02975		AT4G39200.1
Gorai.002G007100	1	1	ARM repeat superfamily protein		PTHR22895	KOG4199				AT4G33945.1
Gorai.002G007800	1	1	ARP protein (REF)	PF08240,PF00106,PF00107	PTHR11695,PTHR11695:SF236	KOG4169			GO:0016491,GO:0008152,GO:0008270,GO:0055114	AT1G49670.1	NQR
Gorai.002G015300	1	1	methyltransferases;nucleic acid binding	PF01170	PTHR13370	KOG2671				AT3G26410.1
Gorai.002G015800	1	1	nucleolin like 2	PF00076	PTHR24012:SF59,PTHR24012	KOG4210		K11294	GO:0003676	AT3G18610.1	ATNUC-L2,NUC-L2,PARLL1
Gorai.002G017300	1	1								AT2G20835.1
Gorai.002G017700	1	1	Protein of unknown function (DUF789)	PF05623						AT4G03420.1
Gorai.002G020400	1	1								AT2G20562.1
Gorai.002G021100	1	1								AT5G64680.1
Gorai.002G022900	1	1		PF01979	PTHR11271:SF7,PTHR11271	KOG3968			GO:0016787
Gorai.002G023000	1	1	cyclophilin 20-2	PF00160	PTHR11071,PTHR11071:SF60	KOG0880	5.2.1.8	K03768	GO:0003755,GO:0006457	AT5G13120.1	ATCYP20-2,CYP20-2
Gorai.002G023500	1	1	ABC transporter family protein	PF00005,PF06472	PTHR11384:SF18,PTHR11384	KOG0060			GO:0005524,GO:0016887,GO:0006810,GO:0005622,GO:0005215,GO:0009276,GO:0016021,GO:0016020	AT1G54350.1
Gorai.002G023600	1	1	Leucine-rich repeat (LRR) family protein	PF00560,PF08263	PTHR24420				GO:0005515	AT3G05990.1
Gorai.002G024600	1	1	Aluminium induced protein with YGL and LRDR motifs	PF12481,PF12504	PTHR11772					AT5G43830.1
Gorai.002G025000	1	1	HR-like lesion-inducing protein-related	PF05514						AT1G04340.1
Gorai.002G027100	1	1	Mitochondrial transcription termination factor family protein	PF02536	PTHR13068,PTHR13068:SF3	KOG1267				AT5G07900.1
Gorai.002G027300	1	1	Mitochondrial transcription termination factor family protein	PF02536	PTHR13068,PTHR13068:SF3					AT3G46950.1
Gorai.002G027600	1	1	Mitochondrial transcription termination factor family protein	PF02536	PTHR13068,PTHR13068:SF3	KOG1267				AT5G07900.1
Gorai.002G028000	1	1	RNA binding	PF03657	PTHR23415,PTHR23415:SF4	KOG3492		K07565		AT4G15770.1
Gorai.002G028500	1	1	eukaryotic translation initiation factor 2 gamma subunit	PF00009,PF09173,PF03144	PTHR23115:SF9,PTHR23115	KOG0466		K03242	GO:0003924,GO:0005525	AT1G04170.1	EIF2 GAMMA
Gorai.002G031800	1	1	evolutionarily conserved C-terminal region 7	PF04146	PTHR12357:SF6,PTHR12357	KOG1901				AT1G48110.1	ECT7
Gorai.002G036100	1	1	RNA polymerase Rpb8	PF03870	PTHR10917	KOG3400		K03016	GO:0006351	AT3G59600.1	NRPB8B,NRPD8B,NRPE8B
Gorai.002G036200	1	1	arginine/serine-rich 45	PF00076	PTHR15481	KOG0130		K14325	GO:0003676	AT1G16610.3	RNPS1,SR45
Gorai.002G036500	1	1	SBP (S-ribonuclease binding protein) family protein		PTHR10044,PTHR10044:SF81	KOG1100				AT3G12920.1
Gorai.002G036600	1	1	Ribosomal protein S5/Elongation factor G/III/V family protein	PF03144,PF00679,PF03764,PF00009	PTHR23115,PTHR23115:SF4	KOG0469	3.6.5.3	K03234	GO:0003924,GO:0005525	AT1G56070.1	LOS1
Gorai.002G038800	1	1	ROP interactive partner 2							AT1G78430.1	RIP2
Gorai.002G038900	1	1	Arabidopsis thaliana gibberellin 2-oxidase 1	PF03171	PTHR10209,PTHR10209:SF55	KOG0143	1.14.11.13	K04125	GO:0016491,GO:0016706,GO:0055114	AT1G78440.1	ATGA2OX1,GA2OX1
Gorai.002G045400	1	1	Tyrosyl-tRNA synthetase, class Ib, bacterial/mitochondrial	PF00579,PF01479	PTHR11766	KOG2623	6.1.1.1	K01866	GO:0000166,GO:0004812,GO:0005524,GO:0006418,GO:0005737,GO:0003723,GO:0006412,GO:0006437,GO:0004831	AT3G02660.1	emb2768
Gorai.002G046200	1	1	rhamnose biosynthesis 1	PF04321,PF01370	PTHR10366,PTHR10366:SF2	KOG0747	4.2.1.76	K12450	GO:0003854,GO:0016616,GO:0006694,GO:0055114,GO:0003824,GO:0050662,GO:0044237,GO:0009058,GO:0008831,GO:0045226	AT1G78570.1	ATRHM1,RHM1,ROL1
Gorai.002G047000	1	1	NAD(H) kinase 3	PF01513	PTHR20275	KOG4180			GO:0003951,GO:0008152	AT1G78590.1	ATNADK-3,NADK3
Gorai.002G047200	1	1	light-regulated zinc finger protein 1	PF00643					GO:0008270,GO:0005622	AT1G78600.1	DBB3,LZF1,STH3
Gorai.002G048100	1	1	TRICHOME BIREFRINGENCE-LIKE 42	PF03005	PTHR13533,PTHR13533:SF3					AT1G78710.1	TBL42
Gorai.002G050300	1	1	SecY protein transport family protein	PF10559,PF00344	PTHR10906	KOG1373		K10956	GO:0015450,GO:0015031,GO:0016020	AT2G34250.1
Gorai.002G050900	1	1	Ubiquitin domain-containing protein		PTHR13609					AT1G53400.1
Gorai.002G054100	1	1								AT1G16916.1
Gorai.002G054300	1	1	tubby like protein 7	PF01167	PTHR16517:SF7,PTHR16517	KOG2502				AT1G53320.1	AtTLP7,TLP7
Gorai.002G054700	1	1			PTHR12472					AT3G14910.1
Gorai.002G055700	1	1	Sphingomyelin synthetase family protein		PTHR21290:SF13,PTHR21290	KOG3058				AT1G43580.1
Gorai.002G056400	1	1	Transducin/WD40 repeat-like superfamily protein	PF00400	PTHR19877	KOG0278		K13137	GO:0005515	AT3G15610.1
Gorai.002G058400	1	1	UDP-Glycosyltransferase superfamily protein	PF00534	PTHR12526,PTHR12526:SF41	KOG0853			GO:0009058	AT3G15940.1
Gorai.002G059100	1	1	sulfate transporter 3;4	PF01740,PF00916	PTHR11814:SF46,PTHR11814	KOG0236			GO:0005215,GO:0006810,GO:0055085,GO:0016021	AT3G15990.1	SULTR3;4
Gorai.002G059500	1	1	Ras-related small GTP-binding family protein	PF00071	PTHR24073,PTHR24073:SF254	KOG0092			GO:0005525,GO:0007264,GO:0005634,GO:0005737,GO:0005622	AT4G19640.1	ARA-7,ARA7,ATRAB-F2B,ATRAB5B,ATRABF2B,RAB-F2B,RABF2B
Gorai.002G059900	1	1	ATP binding microtubule motor family protein	PF00225	PTHR24115,PTHR24115:SF79	KOG0246			GO:0003777,GO:0005524,GO:0007018	AT3G16060.1
Gorai.002G060900	1	1	Peptide-N4-(N-acetyl-beta-glucosaminyl)asparagine amidase A protein	PF12222,PF01208	PTHR21091,PTHR21091:SF2	KOG2872			GO:0004853,GO:0006779	AT3G14920.1
Gorai.002G064900	1	1	Basic-leucine zipper (bZIP) transcription factor family protein	PF00170	PTHR13301,PTHR13301:SF29				GO:0003700,GO:0043565,GO:0046983,GO:0006355	AT3G58120.1	ATBZIP61,BZIP61
Gorai.002G066900	1	1	Polynucleotidyl transferase, ribonuclease H-like superfamily protein	PF00929	PTHR23044	KOG0542				AT3G15140.1
Gorai.002G068000	1	1	Serine/threonine-protein kinase WNK (With No Lysine)-related		PTHR13902:SF32,PTHR13902					AT5G53900.2
Gorai.002G068300	1	1	squamosa promoter binding protein-like 5	PF03110					GO:0003677,GO:0005634	AT3G15270.1	SPL5
Gorai.002G069400	1	1	VQ motif-containing protein	PF05678						AT1G28280.2
Gorai.002G072300	1	1	silencing defective 5	PF08590						AT3G15390.1	SDE5
Gorai.002G077000	1	1	Wound-responsive family protein	PF12609						AT4G10270.1
Gorai.002G081000	1	1	mitochondrial acyl carrier protein 2	PF00550	PTHR20863,PTHR20863:SF5	KOG1748			GO:0048037	AT1G65290.1	mtACP2
Gorai.002G083400	1	1	Homeodomain-like superfamily protein	PF00249					GO:0003677	AT2G46410.1	CPC
Gorai.002G085500	1	1	Small nuclear ribonucleoprotein family protein	PF01423	PTHR15588	KOG1784		K12627		AT1G65700.3
Gorai.002G085700	1	1	Ankyrin repeat family protein							AT1G50900.1
Gorai.002G086700	1	1								AT5G54850.1
Gorai.002G086800	1	1	ARM repeat superfamily protein							AT4G27060.1	CN,SPR2,TOR1
Gorai.002G088000	1	1	Transmembrane proteins 14C	PF03647	PTHR12668	KOG4267			GO:0016020	AT1G50740.1
Gorai.002G091400	1	1		PF03635	PTHR13673	KOG3682				AT1G50730.1
Gorai.002G093000	1	1	Protein of unknown function (DUF3537)	PF12056						AT3G20300.1
Gorai.002G093200	1	1	EPS15 homology domain 1	PF00350	PTHR11216,PTHR11216:SF31	KOG1954			GO:0003924,GO:0005525	AT3G20290.1	ATEHD1,EHD1
Gorai.002G094900	1	1	SHV3-like 1	PF03009	PTHR23344	KOG2258			GO:0008889,GO:0006071	AT5G55480.1	SVL1
Gorai.002G095600	1	1	Mitochondrial import inner membrane translocase subunit Tim17/Tim22/Tim23 family protein	PF02466	PTHR14110	KOG1652			GO:0015031,GO:0008565,GO:0005743	AT4G26670.1
Gorai.002G100800	1	1	NOL1/NOP2/sun family protein / antitermination NusB domain-containing protein	PF01029,PF01189	PTHR22807:SF12,PTHR22807	KOG1122	2.1.1.-	K03500	GO:0003723,GO:0006355,GO:0016740	AT3G13180.1
Gorai.002G102500	1	1		PF01594	PTHR21716	KOG2365				AT5G55960.1
Gorai.002G106100	1	1								AT1G79160.1
Gorai.002G106600	1	none	Chloroplast Ycf2;ATPase, AAA type, core							ATCG01280.1
Gorai.002G107300	1	1	phosphoglycerate kinase 1	PF00162	PTHR11406	KOG1367	2.7.2.3	K00927	GO:0004618,GO:0006096	AT3G12780.1	PGK1
Gorai.002G108300	1	none	Phototropic-responsive NPH3 family protein	PF00651,PF03000	PTHR24413,PTHR24413:SF122				GO:0005515,GO:0004871,GO:0009416	AT5G64330.1	JK218,NPH3,RPT3
Gorai.002G108400	1	1	Ribosomal protein S19e family protein	PF01090	PTHR11710	KOG3411		K02966	GO:0003735,GO:0006412,GO:0005622,GO:0005840	AT5G61170.1
Gorai.002G109800	1	1	ARM repeat superfamily protein	PF09759	PTHR13255					AT4G00231.1	MEE50
Gorai.002G110000	1	1	Protein kinase superfamily protein with octicosapeptide/Phox/Bem1p domain	PF07714,PF00564	PTHR23257:SF68,PTHR23257	KOG0192			GO:0004672,GO:0005524,GO:0006468,GO:0005515	AT1G16270.1
Gorai.002G110100	1	1	scarecrow-like 3	PF03514						AT1G50420.1	SCL-3,SCL3
Gorai.002G111100	1	1	DNA glycosylase superfamily protein	PF03352			3.2.2.20	K01246	GO:0008725,GO:0006284	AT3G12710.1
Gorai.002G112800	1	1	NAD(P)-binding Rossmann-fold superfamily protein	PF01073	PTHR10366,PTHR10366:SF20	KOG1430			GO:0016491,GO:0008152,GO:0003854,GO:0016616,GO:0006694,GO:0055114,GO:0003824,GO:0050662,GO:0044237,GO:0009058,GO:0008831,GO:0045226	AT2G33630.1
Gorai.002G113400	1	1	tonoplast monosaccharide transporter2	PF00083	PTHR24063,PTHR24063:SF85	KOG0569			GO:0022857,GO:0055085,GO:0016021	AT4G35300.1	TMT2
Gorai.002G114400	1	1		PF11938	PTHR13341,PTHR13341:SF2	KOG3782				AT1G42480.1
Gorai.002G115600	1	1	Protein kinase superfamily protein	PF00069	PTHR24420,PTHR24420:SF700	KOG1187			GO:0004672,GO:0005524,GO:0006468	AT1G20650.1
Gorai.002G116000	1	1	3\'-5\'-exoribonuclease family protein	PF01138,PF03725	PTHR11097:SF9,PTHR11097	KOG1613			GO:0003723,GO:0006396	AT1G60080.1
Gorai.002G117400	1	1		PF04950,PF08142	PTHR12858,PTHR12858:SF1	KOG1980			GO:0042254,GO:0005634	AT1G42440.1
Gorai.002G118100	1	1								AT1G63610.2
Gorai.002G118200	1	1	O-fucosyltransferase family protein	PF10250						AT1G76270.1
Gorai.002G121100	1	1	ATPase, V1 complex, subunit B protein	PF00006,PF02874,PF00306	PTHR15184:SF11,PTHR15184	KOG1351	3.6.3.14	K02147	GO:0005524,GO:0016820,GO:0015991,GO:0033178,GO:0046933,GO:0046961,GO:0015992,GO:0046034,GO:0016469	AT4G38510.5
Gorai.002G121600	1	1	Alba DNA/RNA-binding protein	PF01918	PTHR13516	KOG2567			GO:0003676	AT1G76010.1
Gorai.002G124500	1	1	S-adenosyl-L-methionine-dependent methyltransferases superfamily protein	PF03141	PTHR10108,PTHR10108:SF434				GO:0008168	AT3G27230.1
Gorai.002G125000	1	1	glyoxal oxidase-related protein	PF07250						AT1G19900.1
Gorai.002G126700	1	1	20S proteasome alpha subunit F2	PF00227,PF10584	PTHR11599,PTHR11599:SF12	KOG0863	3.4.25.1	K02725	GO:0004298,GO:0051603,GO:0005839,GO:0004175,GO:0006511,GO:0019773	AT1G47250.1	PAF2
Gorai.002G127500	1	1	homeobox protein 33	PF04770						AT1G75240.1	AtHB33,HB33
Gorai.002G127700	1	1	Leucine-rich repeat protein kinase family protein	PF07714,PF00560	PTHR24420,PTHR24420:SF797	KOG1187			GO:0004672,GO:0005524,GO:0006468,GO:0005515	AT2G16250.1
Gorai.002G127800	1	1	Ribosomal protein L27 family protein	PF01016	PTHR15893	KOG4600		K02899	GO:0003735,GO:0006412,GO:0005622,GO:0005840	AT5G15220.1
Gorai.002G128900	1	1	Proteasome component (PCI) domain protein	PF01399	PTHR10855:SF2,PTHR10855	KOG1497			GO:0005515	AT5G42970.1	ATS4,COP14,COP8,CSN4,EMB134,FUS4,FUS8
Gorai.002G129600	1	1	Phospholipid/glycerol acyltransferase family protein	PF01553	PTHR23063	KOG4666			GO:0016746,GO:0008152,GO:0008415	AT1G80950.1
Gorai.002G130000	1	1	MATE efflux family protein	PF01554	PTHR11206:SF46,PTHR11206	KOG1347			GO:0015238,GO:0015297,GO:0006855,GO:0055085,GO:0016020	AT1G47530.1
Gorai.002G132700	1	1	TBP-associated factor 4	PF12174,PF05236	PTHR15138,PTHR15138:SF3	KOG2341			GO:0006352,GO:0005669,GO:0016986	AT5G43130.2	TAF4,TAF4B
Gorai.002G133500	1	1	CYCLIN D3;1	PF00134,PF02984	PTHR10177,PTHR10177:SF76	KOG0656			GO:0005634	AT4G34160.1	CYCD3,CYCD3;1
Gorai.002G136700	1	1	AICARFT/IMPCHase bienzyme family protein	PF02142,PF01808	PTHR11692	KOG2555	2.1.2.3,3.5.4.10	K00602	GO:0003937,GO:0004643,GO:0006164,GO:0006188,GO:0003824	AT2G35040.1
Gorai.002G138600	1	1	glycine-rich RNA-binding protein 4	PF00076	PTHR24011,PTHR24011:SF259				GO:0003676	AT3G23830.1	GR-RBP4,GRP4
Gorai.002G139300	1	1	L-Aspartase-like family protein	PF00206	PTHR11444,PTHR11444:SF3	KOG1316	4.3.2.1	K01755	GO:0042450,GO:0004056	AT5G10920.1
Gorai.002G140000	1	1	Alba DNA/RNA-binding protein	PF01918	PTHR13516				GO:0003676	AT1G76010.1
Gorai.002G141300	1	1
Gorai.002G143400	1	1	ATP synthase D chain, mitochondrial	PF05873	PTHR12700,PTHR12700:SF9	KOG3366	3.6.3.14	K02138	GO:0015078,GO:0015986,GO:0000276	AT3G52300.1	ATPQ
Gorai.002G144400	1	1								AT5G02420.1
Gorai.002G147400	1	1
Gorai.002G151200	1	1	Transcriptional factor B3 family protein / auxin-responsive factor AUX/IAA-related							AT2G33860.1	ARF3,ETT
Gorai.002G154300	1	1	ribosomal protein 5B	PF00177	PTHR11205,PTHR11205:SF1	KOG3291		K02989	GO:0006412,GO:0005840,GO:0005622,GO:0003735,GO:0015935	AT2G37270.1	ATRPS5B,RPS5B
Gorai.002G154400	1	1	ribosomal protein S28	PF01200	PTHR10769	KOG3502		K02979	GO:0003735,GO:0006412,GO:0005622,GO:0005840	AT5G64140.1	RPS28
Gorai.002G156700	1	1	squamosa promoter binding protein-like 9	PF03110					GO:0003677,GO:0005634	AT2G42200.1	SPL9
Gorai.002G157200	1	1	E2F transcription factor 3	PF02319	PTHR12081,PTHR12081:SF18	KOG2577			GO:0003700,GO:0006355,GO:0005667	AT2G36010.1	ATE2FA,E2F3
Gorai.002G161900	1	1	Histidyl-tRNA synthetase 1	PF03129,PF00587	PTHR11476	KOG1936	6.1.1.21	K01892	GO:0000166,GO:0004812,GO:0005524,GO:0006418,GO:0005737,GO:0000049,GO:0043039,GO:0006412,GO:0006427,GO:0004821	AT3G46100.1	ATHRS1,HRS1
Gorai.002G165600	1	1								AT1G79390.1
Gorai.002G170200	1	1								AT2G01990.1
Gorai.002G170400	1	1	high affinity K+ transporter 5	PF02705					GO:0015079,GO:0071805,GO:0016020	AT4G13420.1	ATHAK5,HAK5
Gorai.002G171800	1	1	microtubule-associated proteins 70-2	PF07058						AT1G24764.1	ATMAP70-2,MAP70-2
Gorai.002G174000	1	1		PF01277	PTHR12691,PTHR12691:SF1				GO:0012511,GO:0016021	AT1G23230.1
Gorai.002G174900	1	1	NAD-dependent malic enzyme 2	PF00390,PF03949	PTHR23406:SF2,PTHR23406				GO:0016616,GO:0055114,GO:0051287	AT4G00570.1	NAD-ME2
Gorai.002G178200	1	1	O-fucosyltransferase family protein	PF10250						AT2G01480.1
Gorai.002G178500	1	1								AT1G23110.1
Gorai.002G179200	1	1	hydroxyproline-rich glycoprotein family protein							AT1G70985.1
Gorai.002G182000	1	1	nuclear transport factor 2B	PF02136	PTHR12612	KOG2104			GO:0006810,GO:0005622	AT1G27970.1	NTF2B
Gorai.002G182200	1	1	histidine kinase 3	PF00512,PF00072,PF02518,PF03924	PTHR24423,PTHR24423:SF37	KOG0519	2.7.13.3	K14489	GO:0000156,GO:0000160,GO:0006355,GO:0000155,GO:0007165,GO:0016020,GO:0005524	AT1G27320.1	AHK3,HK3
Gorai.002G183100	1	1	glycosylphosphatidylinositol-anchored lipid protein transfer 1	PF00234						AT1G27950.1	LTPG1
Gorai.002G186100	1	1	S-adenosyl-L-methionine-dependent methyltransferases superfamily protein	PF01209	PTHR10108,PTHR10108:SF236	KOG1540	2.1.1.-	K06127	GO:0004719,GO:0006464,GO:0008168,GO:0008152	AT1G23360.1	MENG
Gorai.002G186500	1	1	transporter associated with antigen processing protein 1	PF00664,PF00005	PTHR24222,PTHR24222:SF78	KOG0058			GO:0005524,GO:0016887,GO:0042626,GO:0006810,GO:0055085,GO:0016021	AT1G70610.1	ATTAP1,TAP1
Gorai.002G186800	1	1	Ribosomal protein L18e/L15 superfamily protein	PF00828	PTHR11721	KOG1742		K02900		AT1G70600.1
Gorai.002G188300	1	1	sphere organelles protein-related					K13150		AT1G13030.1
Gorai.002G189400	1	1	Actin-like ATPase superfamily protein	PF00022	PTHR11937:SF31,PTHR11937	KOG0678			GO:0030833,GO:0005856,GO:0005524,GO:0003779	AT1G13180.1	ARP3,ATARP3,DIS1
Gorai.002G189700	1	1	TCP-1/cpn60 chaperonin family protein	PF00118	PTHR11353:SF25,PTHR11353	KOG0357			GO:0005524,GO:0044267,GO:0051082,GO:0006457	AT1G24510.1
Gorai.002G191000	1	1	Remorin family protein	PF03763						AT1G67590.1
Gorai.002G191300	1	1	adenylate kinase 1	PF00406,PF05191	PTHR23359	KOG3078	2.7.4.3	K00939	GO:0005524,GO:0019205,GO:0006139,GO:0004017	AT5G63400.1	ADK1
Gorai.002G191400	1	1	Ribosomal protein L22p/L17e family protein	PF00237	PTHR11593	KOG3353			GO:0003735,GO:0006412,GO:0005622,GO:0005840,GO:0015934	AT1G67430.1
Gorai.002G192400	1	1	N-terminal nucleophile aminohydrolases (Ntn hydrolases) superfamily protein	PF00227	PTHR11599,PTHR11599:SF3	KOG0175	3.4.25.1	K02737	GO:0004298,GO:0051603,GO:0005839	AT3G26340.1
Gorai.002G193700	1	1	Pollen Ole e 1 allergen and extensin family protein	PF01190						AT2G16630.1
Gorai.002G197100	1	1	glycosyl hydrolase family 35 protein	PF01301	PTHR23421,PTHR23421:SF2	KOG0496			GO:0004553,GO:0005975,GO:0004565,GO:0009341	AT2G16730.1	BGAL13
Gorai.002G197200	1	1	glycosyl hydrolase family 35 protein	PF02140,PF01301	PTHR23421,PTHR23421:SF2	KOG0496			GO:0004553,GO:0005975,GO:0005529,GO:0004565,GO:0009341	AT2G16730.1	BGAL13
Gorai.002G199100	1	1	Cupredoxin superfamily protein	PF02298					GO:0005507,GO:0009055	AT5G26330.1
Gorai.002G200500	1	1	transportin 1	PF03810,PF02985	PTHR10527:SF3,PTHR10527	KOG2023			GO:0005515,GO:0008565,GO:0006886	AT2G16950.2	ATTRN1,TRN1
Gorai.002G202400	1	1		PF03168						AT2G41990.1
Gorai.002G204100	1	1	Arabidopsis protein of unknown function (DUF241)	PF03087						AT2G17080.1
Gorai.002G204800	1	1	Arabidopsis protein of unknown function (DUF241)	PF03087						AT2G17080.1
Gorai.002G205900	1	1	coenzyme Q 3	PF08241	PTHR23134	KOG1270	2.1.1.114	K00591	GO:0008610,GO:0008168,GO:0008757,GO:0009312,GO:0009877,GO:0008276,GO:0006479,GO:0005737,GO:0008152	AT2G30920.1	ATCOQ3,COQ3,EMB3002
Gorai.002G206200	1	1	Plant U-Box 15	PF04564,PF05804	PTHR23315:SF7,PTHR23315				GO:0005515,GO:0004842,GO:0016567,GO:0000151	AT5G42340.1	PUB15
Gorai.002G208400	1	1	Ribosomal protein L10 family protein	PF00466	PTHR21141,PTHR21141:SF1	KOG0816			GO:0042254,GO:0005622	AT1G25260.1
Gorai.002G208500	1	1	partner of Y14-MAGO	PF09282	PTHR22959	KOG4325		K14294	GO:0005515	AT1G11400.1	PYM
Gorai.002G211100	1	1	Plant protein of unknown function (DUF828)	PF03005						AT5G64470.2	TBL12
Gorai.002G211200	1	1	Major facilitator superfamily protein	PF07690	PTHR24003,PTHR24003:SF111	KOG1330			GO:0005215,GO:0006810,GO:0016020,GO:0055085,GO:0016021	AT5G64500.1
Gorai.002G211800	1	1	seryl-tRNA synthetase / serine--tRNA ligase	PF00587,PF02403	PTHR11778	KOG2509	6.1.1.11	K01875	GO:0000166,GO:0004812,GO:0005524,GO:0006418,GO:0005737,GO:0004828,GO:0006434,GO:0006412	AT5G27470.1
Gorai.002G213200	1	1								AT1G71430.1
Gorai.002G215000	1	1	TCP family transcription factor	PF03634	PTHR11584:SF275,PTHR11584					AT1G58100.1
Gorai.002G216900	1	1	Pseudouridine synthase family protein	PF01416	PTHR11142	KOG4393	5.4.99.12	K06173	GO:0003723,GO:0009982,GO:0001522,GO:0009451	AT1G09800.1
Gorai.002G217200	1	1	R-protein L3 B	PF00297	PTHR11363	KOG0746			GO:0003735,GO:0006412,GO:0005622,GO:0005840	AT1G61580.1	ARP2,RPL3B
Gorai.002G218500	1	1	3-ketoacyl-CoA synthase 6	PF08392,PF08541					GO:0016746,GO:0009058,GO:0016747,GO:0006633,GO:0016020,GO:0008610	AT1G68530.1	CER6,CUT1,G2,KCS6,POP1
Gorai.002G220000	1	1	4-phospho-panto-thenoylcysteine synthetase	PF04127	PTHR12290,PTHR12290:SF2	KOG2728	6.3.2.5	K01922		AT1G12350.1	ATCOAB,COAB
Gorai.002G221700	1	1	lysm domain GPI-anchored protein 1 precursor	PF01476	PTHR23354,PTHR23354:SF38				GO:0016998	AT1G21880.2	LYM1
Gorai.002G223600	1	1	seven in absentia of Arabidopsis 2	PF03145	PTHR10315	KOG3002	6.3.2.19	K04506	GO:0006511,GO:0007275,GO:0005634	AT3G58040.1	SINAT2
Gorai.002G225000	1	1	Rhodanese/Cell cycle control phosphatase superfamily protein	PF00581		KOG1530				AT2G42220.1
Gorai.002G225900	1	1	PENTATRICOPEPTIDE REPEAT 596	PF01535	PTHR24015,PTHR24015:SF113					AT1G80270.1	PPR596
Gorai.002G227200	1	1	Calcium-binding EF-hand family protein	PF00036	PTHR10891:SF149,PTHR10891	KOG0027		K13448		AT2G41410.1
Gorai.002G227900	1	1	UDP-glycosyltransferase 73B4	PF00201	PTHR11926,PTHR11926:SF15	KOG1192			GO:0016758,GO:0008152	AT2G15490.1	UGT73B4
Gorai.002G228400	1	1	Ribosomal protein L6 family protein	PF01159,PF03868	PTHR10715	KOG1694		K02934	GO:0003735,GO:0006412,GO:0005622,GO:0005840	AT1G74050.1
Gorai.002G229900	1	1	Transducin/WD40 repeat-like superfamily protein	PF00400	PTHR19842	KOG0315			GO:0005515	AT3G18140.1
Gorai.002G230000	1	1	lysophosphatidyl acyltransferase 2	PF01553	PTHR10983,PTHR10983:SF1	KOG1505			GO:0016746,GO:0008152,GO:0008415	AT3G57650.1	LPAT2
Gorai.002G230100	1	1								AT3G52105.1
Gorai.002G230700	1	1	villin 2	PF00626,PF02209	PTHR11977,PTHR11977:SF9	KOG0443			GO:0003779,GO:0007010	AT2G41740.1	ATVLN2,VLN2
Gorai.002G231200	1	1		PF03959	PTHR22778	KOG2551				AT4G24380.1
Gorai.002G231300	1	1	Pyridoxal phosphate (PLP)-dependent transferases superfamily protein	PF00282	PTHR11999,PTHR11999:SF4	KOG0629	4.1.1.22	K01590	GO:0016831,GO:0030170,GO:0019752	AT1G43710.1	emb1075
Gorai.002G231700	1	1	Ribosome recycling factor	PF01765	PTHR20982	KOG4759		K02838	GO:0006412	AT3G01800.1
Gorai.002G231800	1	1	Translation protein SH3-like family protein	PF01157	PTHR20981	KOG1732		K02889	GO:0003735,GO:0006412,GO:0005622,GO:0005840	AT1G09690.1
Gorai.002G233900	1	1	DNAJ heat shock N-terminal domain-containing protein	PF00226,PF07743	PTHR14021,PTHR14021:SF11	KOG3192		K04082	GO:0031072,GO:0006457	AT5G06410.1
Gorai.002G234100	1	1								AT3G11760.1
Gorai.002G235200	1	1	Ribosomal protein S8e family protein	PF01201	PTHR12642	KOG3163				AT5G06360.1
Gorai.002G235300	1	1	Leucine-rich repeat protein kinase family protein	PF00069,PF00560,PF08263	PTHR24420,PTHR24420:SF467	KOG1187			GO:0004672,GO:0005524,GO:0006468,GO:0005515	AT2G01820.1
Gorai.002G235400	1	1		PF11571	PTHR13130:SF2,PTHR13130					AT3G09180.1
Gorai.002G236400	1	1	Ovate family protein	PF04844						AT2G36026.1
Gorai.002G238900	1	1	probable small nuclear ribonucleoprotein G	PF01423	PTHR10553	KOG1780		K11099		AT2G23930.1	SNRNP-G
Gorai.002G239100	1	1	4\'-phosphopantetheinyl transferase superfamily	PF01648	PTHR12215,PTHR12215:SF3	KOG0945	2.7.8.-	K06133	GO:0000287,GO:0008897,GO:0009059	AT3G11470.1
Gorai.002G241200	1	1	60S acidic ribosomal protein family	PF00428	PTHR21141	KOG3449		K02943	GO:0003735,GO:0006414,GO:0005622,GO:0005840	AT3G44590.1
Gorai.002G242600	1	1	Ribosomal RNA processing Brix domain protein	PF04427	PTHR12728	KOG3031				AT3G23620.1
Gorai.002G242700	1	1	Ergosterol biosynthesis ERG4/ERG24 family	PF01222	PTHR21257,PTHR21257:SF21	KOG1435	1.3.1.70	K00222	GO:0016020	AT3G52940.1	ELL1,FK,HYD2
Gorai.002G243700	1	1	Pyruvate kinase family protein	PF00224,PF02887	PTHR11817	KOG2323	2.7.1.40	K00873	GO:0000287,GO:0004743,GO:0030955,GO:0006096	AT3G52990.1
Gorai.002G244300	1	1	ribosomal protein L24	PF01246	PTHR10792	KOG1722			GO:0006412,GO:0005840,GO:0003735	AT2G36620.1	RPL24A
Gorai.002G244800	1	1	adenylosuccinate synthase	PF00709	PTHR11846	KOG1355	6.3.4.4	K01939	GO:0000287,GO:0004019,GO:0005525,GO:0006164,GO:0005737	AT3G57610.1	ADSS
Gorai.002G244900	1	1	UDP-D-glucose/UDP-D-galactose 4-epimerase 5	PF01370	PTHR10366:SF39,PTHR10366	KOG1371			GO:0016491,GO:0008152,GO:0003854,GO:0016616,GO:0006694,GO:0055114,GO:0003824,GO:0050662,GO:0044237,GO:0009058,GO:0008831,GO:0045226,GO:0006012,GO:0003978	AT4G10960.1	UGE5
Gorai.002G245600	1	1	phosphatidyl inositol monophosphate 5 kinase	PF01504,PF02493	PTHR23086,PTHR23086:SF6	KOG0229	2.7.1.68	K00889	GO:0016307,GO:0046488	AT3G09920.1	PIP5K9
Gorai.002G247000	1	1	Transcription factor DP	PF02319,PF08781	PTHR12548:SF1,PTHR12548	KOG2829			GO:0003700,GO:0006355,GO:0005667	AT5G03415.1	ATDPB,DPB
Gorai.002G248100	1	1	Pentatricopeptide repeat (PPR) superfamily protein	PF01535	PTHR24015:SF77,PTHR24015					AT2G35030.1
Gorai.002G248400	1	1	plasma membrane intrinsic protein 2	PF00230	PTHR19139,PTHR19139:SF27	KOG0223		K09872	GO:0005215,GO:0006810,GO:0016020	AT2G37170.1	PIP2;2,PIP2B
Gorai.002G248500	1	1		PF08241					GO:0008168,GO:0008152	AT3G53400.1
Gorai.002G248800	1	1	syntaxin of plants 71	PF05739	PTHR12380:SF24,PTHR12380	KOG3202		K08506	GO:0005515	AT3G09740.1	ATSYP71,SYP71
Gorai.002G249600	1	1	GTP binding Elongation factor Tu family protein	PF00009,PF03144,PF03143	PTHR23115:SF57,PTHR23115	KOG0052	3.6.5.3	K03231	GO:0003924,GO:0005525	AT1G07940.1
Gorai.002G250200	1	1	Ribosomal protein S12/S23 family protein	PF00164	PTHR11652	KOG1749		K02973	GO:0003735,GO:0006412,GO:0005622,GO:0005840	AT5G02960.1
Gorai.002G250300	1	1								AT3G53320.1
Gorai.002G252100	1	1	integral membrane TerC family protein	PF03741					GO:0016021	AT5G12130.1	ATTERC,PDE149
Gorai.002G253900	1	1	Histone superfamily protein	PF00125	PTHR23428	KOG1744			GO:0003677,GO:0043565,GO:0005622,GO:0006334,GO:0005634,GO:0000786	AT2G37470.1
Gorai.002G255500	1	1	proteasome inhibitor-related	PF08577,PF11566	PTHR13266:SF1,PTHR13266	KOG4761		K06700		AT3G53970.1
Gorai.002G257800	1	1	Pectinacetylesterase family protein	PF03283	PTHR21562:SF1,PTHR21562	KOG4287				AT3G09410.1
Gorai.002G257900	1	1	actin 1	PF00022	PTHR11937,PTHR11937:SF77	KOG0676		K10355		AT2G37620.1	AAc1,ACT1
Gorai.002G258500	1	1	heat shock cognate protein 70-1	PF00012	PTHR19375	KOG0100		K03283	GO:0000902,GO:0005524	AT5G02500.1	AT-HSC70-1,HSC70,HSC70-1,HSP70-1
Gorai.002G259100	1	1	Arabidopsis Inositol phosphorylceramide synthase 1		PTHR21290:SF1,PTHR21290	KOG3058				AT3G54020.1	AtIPCS1
Gorai.002G259200	1	1	Protein kinase protein with tetratricopeptide repeat domain	PF07714	PTHR24420:SF457,PTHR24420	KOG1187			GO:0004672,GO:0005524,GO:0006468	AT3G54030.1
Gorai.002G259800	1	1	Ribosomal protein L35Ae family protein	PF01247	PTHR10902	KOG0887		K02917	GO:0003735,GO:0006412,GO:0005622,GO:0005840	AT1G74270.1
Gorai.002G260600	1	1	Josephin family protein	PF02099	PTHR14159	KOG2935	3.4.22.-	K11863	GO:0008242	AT3G54130.1
Gorai.002G260800	1	1	Cysteine proteinases superfamily protein	PF02338	PTHR13312					AT2G38025.1
Gorai.002G262000	1	1	RP non-ATPase subunit 8A	PF01398	PTHR10540	KOG1556		K03038	GO:0005515	AT5G05780.1	AE3,ATHMOV34,RPN8A
Gorai.002G262600	1	1	Pleckstrin homology (PH) domain superfamily protein	PF00638	PTHR23138,PTHR23138:SF10	KOG0864			GO:0005515,GO:0046907	AT2G30060.1
Gorai.002G262700	1	1	metallopeptidase M24 family protein	PF00557	PTHR10804:SF11,PTHR10804	KOG2776			GO:0009987	AT3G51800.3	ATEBP1,ATG2,EBP1
Gorai.002G263000	1	1	S-adenosyl-L-methionine-dependent methyltransferases superfamily protein	PF03141	PTHR10108,PTHR10108:SF37				GO:0008168,GO:0008152	AT5G04060.1
Gorai.002G264100	1	1	Peptidase S24/S26A/S26B/S26C family protein	PF00717	PTHR12383:SF8,PTHR12383	KOG1568	3.4.99.-	K09648		AT3G08980.1
Gorai.002G264200	1	1	Protein kinase superfamily protein	PF07714	PTHR24420,PTHR24420:SF679	KOG1187			GO:0004672,GO:0005524,GO:0006468	AT3G09010.1
Gorai.002G266000	1	1	Ribosomal protein S4 (RPS4A) family protein	PF08071,PF01479,PF00467,PF00900	PTHR11581	KOG0378		K02987	GO:0003723,GO:0006412,GO:0005840,GO:0005622,GO:0003735	AT5G58420.1
Gorai.002G267700	1	1	tRNA synthetase class I (I, L, M and V) family protein	PF00133,PF08264	PTHR11946:SF11,PTHR11946	KOG0434	6.1.1.5	K01870	GO:0000166,GO:0004812,GO:0005524,GO:0006418,GO:0005737,GO:0006412	AT4G10320.1
Gorai.003G001000	1	1	kinesin-like calmodulin-binding protein (ZWICHEL)	PF09379,PF00784,PF00225,PF00373	PTHR24115,PTHR24115:SF172	KOG0239			GO:0003777,GO:0005524,GO:0007018,GO:0005856	AT5G65930.2	KCBP,PKCBP,ZWI
Gorai.003G004000	1	1	Tetratricopeptide repeat (TPR)-like superfamily protein	PF01535	PTHR24015					AT2G17670.1
Gorai.003G005900	1	1								AT2G17710.1
Gorai.003G007400	1	1	PLAC8 family protein	PF04749	PTHR15907,PTHR15907:SF3					AT4G35920.1	MCA1
Gorai.003G008300	1	1	proteasome alpha subunit D2	PF00227,PF10584	PTHR11599,PTHR11599:SF15	KOG0183	3.4.25.1	K02731	GO:0004298,GO:0051603,GO:0005839,GO:0004175,GO:0006511,GO:0019773	AT5G66140.1	PAD2
Gorai.003G009900	1	1
Gorai.003G014500	1	1	Maf-like protein	PF02545	PTHR11746	KOG1509		K06287	GO:0005737	AT5G66550.1
Gorai.003G014900	1	1	Clathrin adaptor complex small chain family protein	PF01217	PTHR11753	KOG0936			GO:0015031,GO:0008565	AT3G50860.1
Gorai.003G015000	1	1	Putative methyltransferase family protein	PF10294	PTHR14614	KOG2793				AT5G49560.1
Gorai.003G019000	1	1	CAP (Cysteine-rich secretory proteins, Antigen 5, and Pathogenesis-related 1 protein) superfamily protein	PF00188	PTHR10334,PTHR10334:SF7					AT5G66590.1
Gorai.003G019600	1	1								AT4G37090.1
Gorai.003G023400	1	1	Alba DNA/RNA-binding protein	PF01918	PTHR13516				GO:0003676	AT1G76010.1
Gorai.003G025600	1	1	PLC-like phosphodiesterases superfamily protein							AT5G67130.1
Gorai.003G025900	1	1	Integrase-type DNA-binding superfamily protein	PF00847	PTHR11795:SF332,PTHR11795			K09284	GO:0003700,GO:0006355	AT4G36920.1	AP2,FL1,FLO2
Gorai.003G026200	1	1	P-loop containing nucleoside triphosphate hydrolases superfamily protein	PF00225	PTHR24115,PTHR24115:SF174	KOG0244			GO:0003777,GO:0005524,GO:0007018	AT5G47820.1	FRA1
Gorai.003G029500	1	1	Phototropic-responsive NPH3 family protein	PF00651,PF03000	PTHR13690:SF174,PTHR13690				GO:0005515,GO:0004871,GO:0009416	AT2G14820.1	NPY2
Gorai.003G030700	1	1	ADP-ribosylation factor-like A1C	PF00025	PTHR11711,PTHR11711:SF20	KOG0075			GO:0003924,GO:0005525,GO:0007264,GO:0005634,GO:0005737,GO:0005622	AT3G49870.1	ARLA1C,ATARLA1C
Gorai.003G032900	1	1								AT3G49720.1
Gorai.003G040900	1	1	RAB GTPase homolog A4A	PF00071	PTHR24073,PTHR24073:SF213	KOG0087			GO:0005525,GO:0007264,GO:0005622	AT5G65270.1	AtRABA4a,RABA4a
Gorai.003G041100	1	1	Ribosomal protein S6e	PF01092	PTHR11502	KOG1646		K02991	GO:0003735,GO:0006412,GO:0005622,GO:0005840	AT5G10360.1	EMB3010,RPS6B
Gorai.003G041500	1	1	homeobox protein 6	PF02183,PF00046	PTHR24326,PTHR24326:SF221	KOG0483		K09338	GO:0003700,GO:0043565,GO:0006355,GO:0003677,GO:0005634	AT2G22430.1	ATHB6,HB6
Gorai.003G044400	1	1	Thioesterase superfamily protein	PF07977			4.2.1.-	K02372		AT5G10160.1
Gorai.003G044700	1	1	myo-inositol-1-phosphate synthase 2	PF01658,PF07994	PTHR11510	KOG0693	5.5.1.4	K01858	GO:0004512,GO:0006021,GO:0008654	AT2G22240.1	ATIPS2,ATMIPS2,MIPS2
Gorai.003G045300	1	1	Heavy metal transport/detoxification superfamily protein	PF00403	PTHR22814,PTHR22814:SF34	KOG1603			GO:0046872,GO:0030001	AT4G39700.1
Gorai.003G048200	1	1	Leucine-rich receptor-like protein kinase family protein	PF00069,PF00560,PF08263	PTHR24420,PTHR24420:SF122	KOG1187	2.7.10.1,2.7.11.1	K13415	GO:0004672,GO:0005524,GO:0006468,GO:0005515	AT4G39400.1	ATBRI1,BIN1,BRI1,CBB2,DWF2
Gorai.003G049600	1	1	cinnamyl alcohol dehydrogenase 9	PF08240,PF00107	PTHR11695,PTHR11695:SF285	KOG0023	1.1.1.195	K00083	GO:0008270,GO:0016491,GO:0055114	AT4G39330.1	ATCAD9,CAD9
Gorai.003G049900	1	1	neurofilament triplet H protein-related							AT5G64690.1
Gorai.003G051600	1	1								AT1G05205.1
Gorai.003G052100	1	1	4-coumarate:CoA ligase 3	PF00501	PTHR24096,PTHR24096:SF43	KOG1176	6.2.1.12	K01904	GO:0003824,GO:0008152	AT1G65060.1	4CL3
Gorai.003G052200	1	1	cellulose synthase-like D3	PF03552	PTHR10587,PTHR10587:SF9				GO:0016760,GO:0030244,GO:0016020	AT3G03050.1	ATCSLD3,CSLD3,KJK
Gorai.003G053000	1	1	Peptidyl-tRNA hydrolase II (PTH2) family protein	PF01981	PTHR12649,PTHR12649:SF6	KOG3282	3.1.1.29	K04794	GO:0004045,GO:0006412	AT5G16870.1
Gorai.003G053700	1	1	mevalonate diphosphate decarboxylase 1		PTHR10977:SF2,PTHR10977				GO:0008299,GO:0004163	AT2G38700.1	ATMVD1,MVD1
Gorai.003G055600	1	1	NAD(P)-binding Rossmann-fold superfamily protein	PF01370	PTHR10366,PTHR10366:SF9	KOG1502			GO:0003854,GO:0016616,GO:0006694,GO:0055114,GO:0003824,GO:0050662,GO:0044237	AT2G23910.1
Gorai.003G058000	1	1	Nucleotide-diphospho-sugar transferases superfamily protein							AT1G64980.1
Gorai.003G058100	1	1	gamma-tocopherol methyltransferase	PF08241	PTHR10108,PTHR10108:SF217	KOG1269	2.1.1.95	K05928	GO:0008168,GO:0008610,GO:0008152	AT1G64970.1	G-TMT,TMT1,VTE4
Gorai.003G058700	1	1	Root hair defective 3 GTP-binding protein (RHD3)	PF05879	PTHR10751,PTHR10751:SF2	KOG2203			GO:0003924,GO:0005525,GO:0016817	AT3G13870.1	RHD3
Gorai.003G059200	1	1	nucleosome assembly protein 1;2	PF00956	PTHR11875,PTHR11875:SF7	KOG1507			GO:0006334,GO:0005634	AT2G19480.3	NAP1;2,NFA02,NFA2
Gorai.003G060200	1	1	Ubiquitin-conjugating enzyme family protein	PF05773	PTHR12292	KOG4018			GO:0005515	AT1G51730.1
Gorai.003G062700	1	1	CDC27 family protein	PF00515	PTHR12558:SF22,PTHR12558	KOG1126			GO:0005515	AT2G20000.1	CDC27b,HBT
Gorai.003G063100	1	1	mitotic phosphoprotein N\' end (MPPN) family protein	PF05172	PTHR21527:SF2,PTHR21527	KOG4285		K14313		AT3G16310.1
Gorai.003G069700	1	1	carbamoyl phosphate synthetase A	PF00117,PF00988	PTHR11405	KOG0026	6.3.5.5	K01956	GO:0006807,GO:0004086	AT3G27740.1	CARA
Gorai.003G069800	1	1	actin 7	PF00022	PTHR11937,PTHR11937:SF77	KOG0676		K10355		AT5G09810.1	ACT7
Gorai.003G072700	1	1	S-adenosyl-L-methionine-dependent methyltransferases superfamily protein	PF03141	PTHR10108,PTHR10108:SF54				GO:0008168,GO:0008152	AT4G10440.1
Gorai.003G074100	1	1	Subtilase family protein	PF05922,PF00082,PF02225	PTHR10795,PTHR10795:SF17				GO:0004252,GO:0006508,GO:0042802,GO:0043086	AT4G10550.1
Gorai.003G074200	1	1	ABL interactor-like protein 3							AT5G24310.1	ABIL3
Gorai.003G074600	1	1	Heat shock protein 70 (Hsp 70) family protein	PF00012	PTHR19375	KOG0100		K09490	GO:0000902,GO:0005524	AT5G42020.1	BIP,BIP2
Gorai.003G075500	1	1	early nodulin-like protein 8	PF02298					GO:0005507,GO:0009055	AT1G64640.1	AtENODL8,ENODL8
Gorai.003G078300	1	1	transcriptional coactivator p15 (PC4) family protein (KELP)	PF08766,PF02229	PTHR13215	KOG2712			GO:0003677,GO:0003713,GO:0006355	AT4G10920.1	KELP
Gorai.003G080300	1	1	homolog of yeast oxidase assembly 1 (OXA1)	PF02096	PTHR12428,PTHR12428:SF3	KOG1239			GO:0051205,GO:0016021	AT5G62050.1	ATOXA1,OXA1,OXA1AT
Gorai.003G080800	1	1	glycosyl hydrolase 9C2	PF09478,PF00759	PTHR22298:SF3,PTHR22298				GO:0004553,GO:0005975,GO:0030246,GO:0005576	AT1G64390.1	AtGH9C2,GH9C2
Gorai.003G081300	1	1								AT5G41810.2
Gorai.003G081500	1	1	TRICHOME BIREFRINGENCE-LIKE 23	PF03005	PTHR13533,PTHR13533:SF3					AT4G11090.1	TBL23
Gorai.003G084100	1	1	Potassium transporter family protein	PF02705					GO:0015079,GO:0071805,GO:0016020	AT4G23640.1	ATKT3,KUP4,TRH1
Gorai.003G084300	1	1	P-loop containing nucleoside triphosphate hydrolases superfamily protein	PF00004	PTHR23074,PTHR23074:SF20	KOG0737			GO:0005524,GO:0009378,GO:0006281,GO:0006310,GO:0016887	AT1G64110.3
Gorai.003G085700	1	1		PF10172		KOG4816		K11792		AT5G41560.1
Gorai.003G086000	1	1	Nucleolar GTP-binding protein	PF08155,PF06858	PTHR11702:SF4,PTHR11702	KOG1490		K06943	GO:0005525,GO:0015093,GO:0015684,GO:0016021	AT1G50920.1
Gorai.003G086100	1	1	LUC7 related protein	PF03194	PTHR12375,PTHR12375:SF2	KOG0796				AT5G17440.1
Gorai.003G086500	1	1	Peptidase C12, ubiquitin carboxyl-terminal hydrolase 1	PF01088	PTHR10589,PTHR10589:SF16	KOG2778	3.4.19.12	K05610	GO:0004221,GO:0006511,GO:0005622	AT1G65650.1	UCH2
Gorai.003G086700	1	1	DNA GYRASE B2	PF01751,PF00986,PF02518,PF00204	PTHR10169	KOG0355	5.99.1.3	K02470	GO:0003677,GO:0003918,GO:0005524,GO:0006265,GO:0005694	AT5G04130.1	GYRB2
Gorai.003G086800	1	1	Transmembrane proteins 14C	PF03647					GO:0016020	AT3G57280.1
Gorai.003G087100	1	1	DHHC-type zinc finger family protein	PF01529	PTHR22883	KOG1311			GO:0008270	AT3G56930.1
Gorai.003G087400	1	1	Mitochondrial glycoprotein family protein	PF02330	PTHR10826,PTHR10826:SF1	KOG2536			GO:0005759	AT2G41600.5
Gorai.003G088100	1	1	beta glucosidase 42	PF00232	PTHR10353	KOG0626			GO:0004553,GO:0005975	AT5G36890.1	BGLU42
Gorai.003G088300	1	1								AT2G43945.1
Gorai.003G089200	1	1	C2H2-type zinc finger family protein		PTHR10593					AT3G57670.1	NTT,WIP2
Gorai.003G089500	1	1	VQ motif-containing protein	PF05678						AT1G21326.1
Gorai.003G092400	1	1	Leucine-rich repeat protein kinase family protein	PF00069,PF00560,PF08263	PTHR24420:SF671,PTHR24420	KOG1187			GO:0004672,GO:0005524,GO:0006468,GO:0005515	AT2G41820.1
Gorai.003G093200	1	1	guanylate kinase	PF00625	PTHR23117:SF1,PTHR23117	KOG0707	2.7.4.8	K00942	GO:0005515	AT3G57550.2	AGK2,GK-2
Gorai.003G095100	1	1	P-loop containing nucleoside triphosphate hydrolases superfamily protein	PF06068	PTHR11093	KOG2680	3.6.4.12	K11338	GO:0005524,GO:0003678,GO:0006260,GO:0009378,GO:0006281,GO:0006310	AT5G67630.1
Gorai.003G095700	1	1	microtubule end binding protein EB1A	PF03271,PF00307	PTHR10623	KOG3000		K10436	GO:0005515,GO:0008017	AT3G47690.1	ATEB1A,ATEB1H2,EB1A
Gorai.003G096300	1	1	NAP1-related protein 2	PF00956	PTHR11875,PTHR11875:SF47	KOG1508		K11290	GO:0006334,GO:0005634	AT1G18800.1	NRP2
Gorai.003G097400	1	1	malate dehydrogenase	PF00056,PF02866	PTHR11540:SF1,PTHR11540	KOG1494	1.1.1.37	K00026	GO:0016491,GO:0055114,GO:0003854,GO:0016616,GO:0006694,GO:0030060,GO:0006108	AT3G47520.1	MDH
Gorai.003G097600	1	1	Pyridine nucleotide-disulphide oxidoreductase family protein	PF07992	PTHR10617:SF9,PTHR10617		1.3.1.83	K10960	GO:0050660,GO:0008033,GO:0016491,GO:0055114	AT1G74470.1
Gorai.003G098800	1	1	catalytics	PF07995	PTHR19328:SF13,PTHR19328				GO:0016901,GO:0048038,GO:0005975	AT1G74790.1
Gorai.003G099200	1	1	Ribosomal protein S5 family protein	PF03719,PF00333	PTHR13718,PTHR13718:SF4	KOG0877		K02981	GO:0003723,GO:0003735,GO:0006412,GO:0005622,GO:0005840	AT1G58983.1
Gorai.003G100000	1	1	ATP synthase D chain, mitochondrial		PTHR12700,PTHR12700:SF9	KOG3366				AT3G52300.1	ATPQ
Gorai.003G101300	1	1	glycine-rich RNA-binding protein 3	PF00076	PTHR24012				GO:0003676	AT5G61030.1	GR-RBP3
Gorai.003G101600	1	1	mitochondrial import receptor subunit TOM5 homolog							AT5G08040.1	TOM5
Gorai.003G105100	1	1	enolase 1	PF03952,PF00113	PTHR11902	KOG2670			GO:0000287,GO:0004634,GO:0006096,GO:0000015	AT1G74030.1	ENO1
Gorai.003G106100	1	1	ATPase E1-E2 type family protein / haloacid dehalogenase-like hydrolase family protein	PF00122	PTHR24092:SF18,PTHR24092	KOG0206			GO:0000166,GO:0046872	AT1G68710.1
Gorai.003G106600	1	1	P-loop containing nucleoside triphosphate hydrolases superfamily protein	PF00271,PF00270	PTHR24031,PTHR24031:SF23	KOG0342	3.6.4.13	K13179	GO:0003676,GO:0005524,GO:0008026,GO:0004386	AT3G18600.1
Gorai.003G106700	1	1	Plant protein of unknown function (DUF868)	PF05910						AT4G12690.1
Gorai.003G108300	1	1	Pectin lyase-like superfamily protein	PF00544			4.2.2.2	K01728		AT4G24780.1
Gorai.003G108600	1	1	Peptidase C78, ubiquitin fold modifier-specific peptidase 1/ 2	PF07910	PTHR13226,PTHR13226:SF1					AT3G48380.1
Gorai.003G110100	1	1	histone deacetylase 6	PF00850	PTHR10625,PTHR10625:SF28	KOG1342	3.5.1.98	K06067		AT5G63110.1	ATHDA6,AXE1,HDA6,RPD3B,RTS1,SIL1
Gorai.003G110200	1	1	Eukaryotic rpb5 RNA polymerase subunit family protein	PF01191,PF03871	PTHR10535	KOG3218			GO:0003677,GO:0003899,GO:0006351,GO:0005634	AT3G22320.1	ATRPABC24.3,NRPB5,NRPD5,RPB5A
Gorai.003G110600	1	1	polyadenylate-binding protein 1	PF00076	PTHR23365	KOG4209			GO:0003676	AT5G51120.1	ATPABN1,PABN1
Gorai.003G112300	1	1	alpha/beta-Hydrolases superfamily protein	PF05057	PTHR12482	KOG4372				AT5G51180.1
Gorai.003G113400	1	1	structural maintenance of chromosomes 2	PF02463,PF06470	PTHR18937,PTHR18937:SF9	KOG0933		K06674	GO:0005515,GO:0005524,GO:0051276,GO:0005694	AT5G62410.1	ATCAP-E1,ATSMC4,SMC2,TTN3
Gorai.003G114200	1	1	Tetratricopeptide repeat (TPR)-like superfamily protein	PF01535	PTHR24015,PTHR24015:SF53					AT5G62370.1
Gorai.003G115600	1	1	Protein kinase superfamily protein	PF00069,PF07714	PTHR23257:SF83,PTHR23257	KOG0192			GO:0004672,GO:0005524,GO:0006468	AT5G50180.1
Gorai.003G116900	1	1	DCD (Development and Cell Death) domain protein	PF00168,PF07002	PTHR10857	KOG1327			GO:0005515	AT5G61910.4
Gorai.003G117500	1	1	Mitochondrial substrate carrier family protein	PF00153	PTHR24089:SF34,PTHR24089	KOG0036				AT5G51050.1
Gorai.003G120600	1	1	Serine/threonine-protein kinase Rio1	PF01163	PTHR10593:SF5,PTHR10593	KOG2270	2.7.11.1	K07178	GO:0003824,GO:0005524	AT5G37350.1
Gorai.003G121700	1	1	ABL interactor-like protein 3							AT5G24310.1	ABIL3
Gorai.003G122500	1	1	F-box family protein	PF00646	PTHR22844				GO:0005515	AT5G45360.1
Gorai.003G125300	1	1	proliferating cell nuclear antigen 2	PF00705,PF02747	PTHR11352	KOG1636		K04802	GO:0003677,GO:0030337,GO:0006275,GO:0043626,GO:0006281	AT2G29570.1	ATPCNA2,PCNA2
Gorai.003G126700	1	1	Protein of unknown function (DUF3527)	PF12043						AT5G59020.1
Gorai.003G128800	1	1	sterol 4-alpha-methyl-oxidase 2-1	PF04116	PTHR11863,PTHR11863:SF23	KOG0873	1.14.13.72	K14424	GO:0005506,GO:0016491,GO:0006633,GO:0055114	AT1G07420.1	ATSMO2,SMO2-1
Gorai.003G129100	1	1	Homeodomain-like superfamily protein	PF00249					GO:0003677	AT3G46640.1	LUX,PCL1
Gorai.003G129200	1	1	pumilio 2	PF00806,PF07990	PTHR12537:SF12,PTHR12537	KOG1488			GO:0003723	AT2G29190.1	APUM2,PUM2
Gorai.003G130000	1	1	Haloacid dehalogenase-like hydrolase (HAD) superfamily protein		PTHR18901	KOG3109				AT5G59480.1
Gorai.003G130400	1	1	SCARECROW-like 14	PF03514						AT1G07530.1	ATGRAS2,GRAS2,SCL14
Gorai.003G130800	1	1	Rab5-interacting family protein	PF07019	PTHR12906	KOG3415				AT5G59410.1
Gorai.003G131000	1	1	expansin A4	PF01357,PF03330						AT2G39700.1	ATEXP4,ATEXPA4,ATHEXP ALPHA 1.6,EXPA4
Gorai.003G131700	1	1	beta-ketoacyl reductase 1	PF00106	PTHR24316:SF38,PTHR24316	KOG1014			GO:0016491,GO:0008152	AT1G67730.1	ATKCR1,KCR1,YBR159
Gorai.003G131800	1	1	Pentatricopeptide repeat (PPR-like) superfamily protein	PF01535	PTHR24015					AT4G11690.1
Gorai.003G131900	1	1	Tim10/DDP family zinc finger protein	PF02953	PTHR10898	KOG3479			GO:0006626,GO:0045039,GO:0042719	AT3G46560.1	emb2474,TIM9
Gorai.003G132200	1	1	pol-like 5	PF00481	PTHR13832,PTHR13832:SF168				GO:0003824	AT1G07630.1	PLL5
Gorai.003G133500	1	1								AT1G47278.2
Gorai.003G134700	1	1								AT3G46430.1
Gorai.003G136100	1	1	ribosomal protein S15A	PF00410	PTHR11758	KOG1754		K02957	GO:0003735,GO:0006412,GO:0005622,GO:0005840	AT1G07770.1	RPS15A
Gorai.003G136500	1	1	Protein-tyrosine phosphatase-like, PTPLA	PF04387	PTHR11035,PTHR11035:SF3	KOG3187				AT5G59770.1
Gorai.003G136600	1	1	tonoplast intrinsic protein 1;3	PF00230	PTHR19139,PTHR19139:SF54	KOG0223			GO:0005215,GO:0006810,GO:0016020	AT4G01470.1	ATTIP1.3,GAMMA-TIP3,TIP1;3
Gorai.003G137000	1	1	UDP-N-acetylglucosamine (UAA) transporter family	PF08449	PTHR10778,PTHR10778:SF13	KOG1581			GO:0016020,GO:0055085	AT5G59740.1
Gorai.003G137400	1	1	Ribosomal L29 family protein	PF00831	PTHR13872,PTHR13872:SF11	KOG3436		K02918	GO:0003735,GO:0006412,GO:0005622,GO:0005840	AT5G02610.1
Gorai.003G140200	1	1	Ribosomal protein L7Ae/L30e/S12e/Gadd45 family protein	PF01248	PTHR11449	KOG2988		K02908	GO:0006412,GO:0005840,GO:0005622,GO:0003735	AT1G36240.1
Gorai.003G140300	1	1	embryo defective 1379	PF08746,PF07574	PTHR20973	KOG4718				AT5G21140.1	emb1379
Gorai.003G141200	1	1	hydroxyproline-rich glycoprotein family protein							AT3G45230.1
Gorai.003G141700	1	1	Ribosomal protein L11 family protein	PF03946,PF00298	PTHR11661	KOG0886			GO:0003735,GO:0006412,GO:0005840	AT5G60670.1
Gorai.003G141800	1	1	Protein of unknown function, DUF584	PF04520						AT5G60680.1
Gorai.003G148600	1	1	ubiquitin-activating enzyme 1	PF00899,PF10585,PF02134,PF09358	PTHR10953:SF4,PTHR10953	KOG2012	6.3.2.19	K03178	GO:0003824,GO:0005524,GO:0008641,GO:0006464	AT2G30110.1	ATUBA1,MOS5,UBA1
Gorai.003G148700	1	1			PTHR21422,PTHR21422:SF3					AT5G58510.1
Gorai.003G149300	1	1	UDP-glucosyl transferase 71B6	PF00201	PTHR11926,PTHR11926:SF15	KOG1192			GO:0016758,GO:0008152	AT3G21780.1	UGT71B6
Gorai.003G151900	1	1								AT1G06930.1
Gorai.003G152200	1	1	P-loop containing nucleoside triphosphate hydrolases superfamily protein	PF01926	PTHR11649,PTHR11649:SF46				GO:0005525,GO:0005622	AT5G58370.2
Gorai.003G152500	1	1	Insulinase (Peptidase family M16) family protein	PF00675,PF05193	PTHR11851:SF66,PTHR11851	KOG0959	3.4.24.61	K01411	GO:0004222,GO:0006508,GO:0008270	AT1G06900.1
Gorai.003G154700	1	1	Mitochondrial substrate carrier family protein	PF00153	PTHR24089,PTHR24089:SF78	KOG0759				AT5G19760.1
Gorai.003G156100	1	1	BTB/POZ domain-containing protein							AT1G63850.1
Gorai.003G157200	1	1	RING/U-box superfamily protein	PF00097	PTHR22937:SF23,PTHR22937					AT5G41350.1
Gorai.003G157500	1	1	hydroxyproline-rich glycoprotein family protein							AT5G52430.1
Gorai.003G158300	1	1	acid-amino acid ligases;ligases;ATP binding;ATP binding;ligases	PF01225,PF02875,PF08245	PTHR23135,PTHR23135:SF4				GO:0005524,GO:0009058,GO:0016874	AT1G63680.1	ATMURE,MURE,PDE316
Gorai.003G160000	1	1	Myosin heavy chain-related protein		PTHR23160					AT1G63300.1
Gorai.003G161100	1	1	replication factor C 2	PF08542,PF00004	PTHR11669	KOG0991		K10755	GO:0005524,GO:0016851,GO:0015979,GO:0015995,GO:0004386,GO:0009378,GO:0006281,GO:0006310,GO:0006260,GO:0005663,GO:0003689	AT1G63160.1	RFC2
Gorai.003G163200	1	1	hydroxymethylglutaryl-CoA synthase / HMG-CoA synthase / 3-hydroxy-3-methylglutaryl coenzyme A synthase	PF01154,PF08540	PTHR11877,PTHR11877:SF10	KOG1393	2.3.3.10	K01641	GO:0004421,GO:0008299	AT4G11820.2	EMB2778,FKP1,HMGS,MVA1
Gorai.003G163300	1	1	nucleotide-rhamnose synthase/epimerase-reductase	PF01370	PTHR10366,PTHR10366:SF55	KOG1429	1.1.1.-,5.1.3.-	K12451	GO:0003824,GO:0050662,GO:0044237,GO:0009058,GO:0008831,GO:0045226	AT1G63000.1	NRS/ER,UER1
Gorai.003G164700	1	1	Cell cycle regulated microtubule associated protein	PF12214	PTHR14326:SF11,PTHR14326					AT4G22860.1
Gorai.003G166900	1	1								AT1G62870.1
Gorai.003G169400	1	1								AT4G22600.1
Gorai.003G169500	1	1	Exostosin family protein	PF03016	PTHR11062	KOG1021			GO:0016020	AT4G22580.1
Gorai.003G169800	1	1	PLATZ transcription factor family protein	PF04640						AT3G60670.1
Gorai.003G170200	1	1	OSBP(oxysterol binding protein)-related protein 2A	PF01237,PF00169	PTHR10972,PTHR10972:SF8	KOG1737			GO:0005515,GO:0005543	AT4G22540.1	ORP2A
Gorai.003G177800	1	1								AT3G01680.1
Gorai.003G179400	1	1	SBP (S-ribonuclease binding protein) family protein		PTHR14493,PTHR14493:SF21	KOG1100				AT1G32740.1
Gorai.003G179800	1	1	Duplicated homeodomain-like superfamily protein							AT5G45420.1
Gorai.003G181400	1	1	Peptidase M20/M25/M40 family protein	PF07687,PF01546	PTHR11014:SF7,PTHR11014	KOG2276			GO:0016787,GO:0008152	AT4G17830.1
Gorai.003G183800	1	1	P-glycoprotein 2	PF00664,PF00005	PTHR24221	KOG0055			GO:0005524,GO:0016887,GO:0042626,GO:0006810,GO:0055085,GO:0016021	AT4G25960.1	PGP2
Gorai.003G184300	1	1	Ribosomal protein L25/Gln-tRNA synthetase, anti-codon-binding domain	PF01386					GO:0003735,GO:0008097,GO:0006412,GO:0005622,GO:0005840	AT4G23620.1
Gorai.003G184400	1	1								AT2G35470.1
Gorai.003G184900	1	1	homeobox-7	PF01852,PF00046	PTHR24325:SF193,PTHR24325	KOG0484			GO:0003700,GO:0043565,GO:0006355	AT5G46880.1	HB-7,HDG5
Gorai.003G185000	1	1	homeobox-7	PF01852,PF00046	PTHR24325:SF193,PTHR24325	KOG0484			GO:0003700,GO:0043565,GO:0006355	AT5G46880.1	HB-7,HDG5
Gorai.003G186100	1	1	signal recognition particle binding	PF09439	PTHR19326	KOG0090			GO:0003924,GO:0005525,GO:0000166,GO:0005634,GO:0005737,GO:0007264,GO:0005622	AT5G05670.1
Gorai.003G186400	1	1	DEA(D/H)-box RNA helicase family protein	PF00271,PF00270	PTHR24031,PTHR24031:SF125	KOG0331			GO:0003676,GO:0005524,GO:0008026,GO:0004386	AT1G31970.1	STRS1
Gorai.004G003700	1	1	Ribosomal L29 family protein	PF00831	PTHR13872,PTHR13872:SF11	KOG3436		K02918	GO:0003735,GO:0006412,GO:0005622,GO:0005840	AT5G02610.1
Gorai.004G007200	1	1	CRINKLY4 related 3	PF00069	PTHR24420,PTHR24420:SF875	KOG1187			GO:0004672,GO:0005524,GO:0006468	AT3G55950.1	ATCRR3,CCR3
Gorai.004G008300	1	1	phosphoglycerate/bisphosphoglycerate mutase family protein	PF00300	PTHR23029	KOG0235				AT5G22620.1
Gorai.004G010200	1	1	copper ion binding							AT2G27730.1
Gorai.004G010600	1	1	vesicle-associated membrane protein 714	PF00957	PTHR21136,PTHR21136:SF77	KOG0859		K08515	GO:0016192,GO:0016021	AT5G22360.1	ATVAMP714,VAMP714
Gorai.004G012300	1	1
Gorai.004G013100	1	1	Preprotein translocase Sec, Sec61-beta subunit protein	PF03911	PTHR13509	KOG3457				AT5G60460.1
Gorai.004G013500	1	1	Ribosomal protein L30/L7 family protein	PF00327,PF08079	PTHR11524	KOG3184		K02937	GO:0003735,GO:0006412,GO:0005840	AT3G13580.1
Gorai.004G014200	1	1	RNA-binding (RRM/RBD/RNP motifs) family protein	PF00076	PTHR24012:SF161,PTHR24012				GO:0003676	AT3G08000.1
Gorai.004G015300	1	1	Tetrapyrrole (Corrin/Porphyrin) Methylases	PF00590	PTHR10882	KOG3123			GO:0008168,GO:0008152,GO:0017183,GO:0004164	AT4G31790.1
Gorai.004G015600	1	1	ALBINA 1	PF00092,PF01078	PTHR10579:SF4,PTHR10579		6.6.1.1	K03404	GO:0005515,GO:0005524,GO:0008134,GO:0006355,GO:0016851,GO:0015979,GO:0015995	AT1G08520.1	ALB-1V,ALB1,CHLD,PDE166,V157
Gorai.004G016500	1	1	calmodulin-binding family protein							AT3G13600.1
Gorai.004G017400	1	1	Bifunctional inhibitor/lipid-transfer protein/seed storage 2S albumin superfamily protein	PF00234						AT1G55260.2
Gorai.004G018400	1	1	NAD(P)-binding Rossmann-fold superfamily protein			KOG0725	1.3.1.9	K00208		AT2G05990.1	ENR1,MOD1
Gorai.004G020000	1	1	Peroxisomal membrane 22 kDa (Mpv17/PMP22) family protein	PF04117	PTHR11266,PTHR11266:SF4	KOG1944		K13348	GO:0016021	AT5G19750.1
Gorai.004G022600	1	1	Leucine-rich repeat transmembrane protein kinase	PF07714	PTHR24420	KOG1187			GO:0004672,GO:0005524,GO:0006468	AT1G56140.1
Gorai.004G024300	1	1	Ubiquitin carboxyl-terminal hydrolase family protein	PF11955						AT1G71850.1
Gorai.004G024500	1	1	regulatory particle non-ATPase 13	PF04683	PTHR12225	KOG3037			GO:0005634,GO:0005737	AT2G26590.1	RPN13
Gorai.004G025600	1	1	metaxin-related		PTHR12289,PTHR12289:SF9	KOG3028				AT2G19080.1
Gorai.004G025700	1	1	valyl-tRNA synthetase / valine--tRNA ligase (VALRS)	PF00133,PF08264	PTHR11946,PTHR11946:SF5	KOG0432	6.1.1.9	K01873	GO:0000166,GO:0004812,GO:0005524,GO:0006418,GO:0005737,GO:0006412,GO:0006438,GO:0004832	AT1G14610.1	TWN2,VALRS
Gorai.004G026700	1	1	villin 4	PF00626,PF02209	PTHR11977,PTHR11977:SF9	KOG0443			GO:0003779,GO:0007010	AT4G30160.1	ATVLN4,VLN4
Gorai.004G027300	1	1	H(+)-ATPase 2	PF00702,PF00690,PF00122	PTHR24093:SF61,PTHR24093	KOG0205	3.6.3.6	K01535	GO:0000166,GO:0046872,GO:0003824,GO:0008152,GO:0016020,GO:0015662,GO:0006812,GO:0006754	AT4G30190.1	AHA2,HA2,PMA2
Gorai.004G028600	1	1	plastid developmental protein DAG, putative		PTHR10795,PTHR10795:SF75					AT1G11430.1
Gorai.004G028800	1	1	ubiquitin-specific protease 14	PF02148,PF00443,PF00627	PTHR24006,PTHR24006:SF36	KOG0944	3.1.2.15	K11836	GO:0004221,GO:0006511,GO:0005515,GO:0008270	AT3G20630.1	ATUBP14,PER1,TTN6,UBP14
Gorai.004G029300	1	1	Seven transmembrane MLO family protein	PF03094				K08472	GO:0008219,GO:0016021	AT5G53760.1	ATMLO11,MLO11
Gorai.004G029400	1	1	embryo defective 2737							AT5G53860.2	emb2737,EMB64
Gorai.004G029600	1	1	Auxin-responsive GH3 family protein	PF03321						AT1G28130.1	GH3.17
Gorai.004G031700	1	1	Dihydrolipoamide succinyltransferase	PF00364,PF00198	PTHR23151	KOG0559	2.3.1.61	K00658	GO:0016746,GO:0008152,GO:0008415	AT4G26910.2
Gorai.004G033000	1	1	Ribosomal protein S8e family protein	PF01201	PTHR10394	KOG3283		K02995		AT5G59240.1
Gorai.004G033300	1	1	Haloacid dehalogenase-like hydrolase (HAD) superfamily protein	PF03031	PTHR12210,PTHR12210:SF3	KOG2832			GO:0005515	AT1G55900.1	emb1860,TIM50
Gorai.004G034800	1	1	COP9 signalosome subunit 6A	PF01398	PTHR10540	KOG3050			GO:0005515	AT5G56280.1	CSN6A
Gorai.004G035000	1	1	Major facilitator superfamily protein		PTHR11328:SF24,PTHR11328	KOG4830				AT3G60070.1
Gorai.004G036300	1	1								AT5G05800.1
Gorai.004G040700	1	1	ribosomal protein S13A	PF00312,PF08069	PTHR11885	KOG0400		K02953	GO:0003735,GO:0006412,GO:0005622,GO:0005840	AT4G00100.1	ATRPS13A,PFL2,RPS13,RPS13A
Gorai.004G040900	1	1	N-terminal nucleophile aminohydrolases (Ntn hydrolases) superfamily protein	PF00227	PTHR11599,PTHR11599:SF8	KOG0179	3.4.25.1	K02732	GO:0004298,GO:0051603,GO:0005839	AT3G60820.1	PBF1
Gorai.004G041500	1	1	WD-40 repeat family protein / beige-related	PF00400,PF02138	PTHR13743:SF59,PTHR13743	KOG1787			GO:0005515	AT2G45540.1
Gorai.004G042000	1	1								AT2G45990.1
Gorai.004G043500	1	1	nucleotidyltransferases	PF01909	PTHR23092:SF15,PTHR23092				GO:0016779	AT3G61690.1
Gorai.004G044600	1	1			PTHR23339,PTHR23339:SF32					AT3G62010.1
Gorai.004G047700	1	1	polyamine oxidase 4	PF01593	PTHR10742:SF30,PTHR10742	KOG0029			GO:0016491,GO:0055114	AT1G65840.1	ATPAO4,PAO4
Gorai.004G048600	1	1	Mitochondrial substrate carrier family protein	PF00153	PTHR24089:SF45,PTHR24089	KOG0768				AT5G42130.1
Gorai.004G050800	1	1	CTP synthase family protein	PF00117,PF06418	PTHR11550	KOG2387	6.3.4.2	K01937	GO:0003883,GO:0006221,GO:0016787,GO:0006541	AT4G02120.1
Gorai.004G052100	1	1	ribosomal protein L18	PF00828	PTHR10934	KOG1714		K02883	GO:0006412,GO:0005840,GO:0005622,GO:0003735	AT3G05590.1	RPL18
Gorai.004G052300	1	1	NADH-ubiquinone oxidoreductase-related	PF10200			1.6.5.3,1.6.99.3	K03938		AT2G47690.1
Gorai.004G054300	1	1	transducin family protein / WD-40 repeat family protein	PF00400,PF09384	PTHR19924:SF3,PTHR19924	KOG0310		K14549	GO:0005515,GO:0006364,GO:0005730	AT2G47990.1	EDA13,EDA19,SWA1
Gorai.004G054500	1	1	BRI1 suppressor 1 (BSU1)-like 1	PF00149	PTHR11668,PTHR11668:SF17	KOG0374	3.1.3.16	K01090	GO:0016787	AT4G03080.1	BSL1
Gorai.004G056700	1	1	NADH-ubiquinone oxidoreductase 24 kDa subunit, putative	PF01257	PTHR10371	KOG3196	1.6.5.3,1.6.99.3	K03943	GO:0016491,GO:0051287,GO:0055114	AT4G02580.1
Gorai.004G056900	1	1	Protein of unknown function, DUF593	PF04576						AT1G08800.1
Gorai.004G058600	1	1	Ribosomal protein L13 family protein	PF00572	PTHR11545	KOG3204		K02872	GO:0003735,GO:0006412,GO:0005840	AT5G48760.1
Gorai.004G059100	1	1	Nuclear transport factor 2 (NTF2) family protein with RNA binding (RRM-RBD-RNP motifs) domain	PF00076,PF02136	PTHR10693:SF8,PTHR10693	KOG0116			GO:0003676,GO:0006810,GO:0005622	AT3G25150.2
Gorai.004G060400	1	1	ribosomal protein L5 B	PF00861	PTHR23410	KOG0875		K02932	GO:0003735,GO:0006412,GO:0005622,GO:0005840,GO:0008097	AT5G39740.1	OLI7,RPL5B
Gorai.004G061000	1	1	CONSTANS-like 9	PF00643,PF06203					GO:0008270,GO:0005622,GO:0005515	AT3G07650.1	COL9
Gorai.004G061300	1	1	Rubisco methyltransferase family protein	PF09273,PF00856	PTHR13271	KOG1337			GO:0005515	AT3G07670.1
Gorai.004G066700	1	1	sterol methyltransferase 1	PF08241,PF08498	PTHR10108,PTHR10108:SF21	KOG1269	2.1.1.41	K00559	GO:0008168,GO:0008610,GO:0008152,GO:0006694	AT5G13710.1	CPH,SMT1
Gorai.004G067700	1	1	mitochondrial acyl carrier protein 1	PF00550	PTHR20863,PTHR20863:SF8	KOG1748	1.6.5.3,1.6.99.3	K03955	GO:0048037	AT2G44620.1	MTACP-1,MTACP1
Gorai.004G069900	1	1	uclacyanin 3	PF02298					GO:0005507,GO:0009055	AT3G60280.1	UCC3
Gorai.004G070400	1	1	Protein of unknown function (DUF630 and DUF632)	PF04782,PF04783	PTHR21450					AT3G60320.1
Gorai.004G075000	1	1	AUX/IAA transcriptional regulator family protein	PF02309					GO:0006355,GO:0005634	AT5G43700.1	ATAUX2-11,IAA4
Gorai.004G078100	1	1	DNAse I-like superfamily protein	PF03372	PTHR11200:SF29,PTHR11200	KOG0565				AT3G63240.1
Gorai.004G083500	1	1	Small nuclear ribonucleoprotein family protein	PF01423	PTHR13829	KOG3448		K12621		AT1G03330.1
Gorai.004G085900	1	1	F-box/RNI-like superfamily protein		PTHR23125:SF17,PTHR23125			K14485		AT3G62980.1	TIR1
Gorai.004G088200	1	1	Cation efflux family protein	PF01545	PTHR11562	KOG1485			GO:0008324,GO:0006812,GO:0055085,GO:0016021	AT2G47830.1
Gorai.004G088800	1	1	Heavy metal transport/detoxification superfamily protein	PF00403	PTHR22814,PTHR22814:SF16	KOG1603			GO:0046872,GO:0030001	AT5G27690.1
Gorai.004G089900	1	1	complex 1 family protein / LVR family protein	PF05347						AT3G62810.1
Gorai.004G090300	1	1	Ribosomal L22e protein family	PF01776	PTHR10064	KOG3434			GO:0003735,GO:0006412,GO:0005622,GO:0005840	AT3G05560.1
Gorai.004G091200	1	1	ribosomal protein L18	PF00828	PTHR10934	KOG1714		K02883	GO:0006412,GO:0005840,GO:0005622,GO:0003735	AT3G05590.1	RPL18
Gorai.004G094800	1	1	calmodulin-binding family protein							AT3G13600.1
Gorai.004G095000	1	1	cyclin b3;1	PF00134,PF02984	PTHR10177,PTHR10177:SF24	KOG0653		K05868	GO:0005634	AT1G16330.1	CYCB3;1
Gorai.004G095400	1	1	Aldolase-type TIM barrel family protein	PF00793	PTHR21057:SF2,PTHR21057		2.5.1.55	K01627	GO:0009058,GO:0008676,GO:0008152,GO:0005737	AT1G79500.1	AtkdsA1
Gorai.004G096600	1	1	Ribosomal L18p/L5e family protein	PF00861				K02881	GO:0003735,GO:0006412,GO:0005622,GO:0005840	AT1G48350.1
Gorai.004G096800	1	1	Glutaredoxin family protein	PF00462	PTHR10168	KOG1752		K03676	GO:0009055,GO:0015035,GO:0045454	AT5G20500.1
Gorai.004G098600	1	1								AT4G04614.1
Gorai.004G100300	1	1	P-loop containing nucleoside triphosphate hydrolases superfamily protein	PF00004	PTHR23070,PTHR23070:SF1	KOG0743			GO:0005524	AT5G57480.1
Gorai.004G100400	1	1	voltage dependent anion channel 4	PF01459	PTHR11743,PTHR11743:SF14	KOG3126			GO:0008308,GO:0006820,GO:0044070,GO:0055085,GO:0005741	AT5G57490.1	ATVDAC4,VDAC4
Gorai.004G101600	1	1	CBL-interacting protein kinase 21	PF03822,PF00069	PTHR24343,PTHR24343:SF129	KOG0583			GO:0004672,GO:0005524,GO:0006468,GO:0007165	AT5G57630.1	CIPK21,SnRK3.4
Gorai.004G103700	1	1		PF01980	PTHR12818	KOG2942				AT4G28020.1
Gorai.004G104000	1	1	sequence-specific DNA binding transcription factors							AT4G30410.1
Gorai.004G104100	1	1	Fatty acid hydroxylase superfamily	PF12076,PF04116	PTHR11863,PTHR11863:SF22				GO:0005506,GO:0016491,GO:0006633,GO:0055114	AT5G57800.1	CER3,FLP1,WAX2,YRE
Gorai.004G106100	1	1	Protein of unknown function (DUF788)	PF05620	PTHR13505,PTHR13505:SF2	KOG3269				AT2G23940.1
Gorai.004G109800	1	1		PF07647					GO:0005515	AT2G12462.1
Gorai.004G110500	1	1	Pentatricopeptide repeat (PPR) superfamily protein	PF01535	PTHR24015					AT5G11310.1
Gorai.004G116000	1	1		PF11341						AT5G52960.1
Gorai.004G116900	1	1	phosphatase-related	PF04969,PF05002,PF00515	PTHR22904,PTHR22904:SF69	KOG1309		K12795	GO:0005515	AT4G11260.1	ATSGT1B,EDM1,ETA3,RPR1,SGT1B
Gorai.004G117600	1	1	fibrillarin 2	PF01269	PTHR10335	KOG1596	2.1.1.-	K14563	GO:0003723,GO:0008168,GO:0006364,GO:0008033,GO:0016429,GO:0030488	AT4G25630.1	ATFIB2,FIB2
Gorai.004G117700	1	1	HXXXD-type acyl-transferase family protein	PF02458					GO:0016747	AT5G23940.1	DCR,EMB3009,PEL3
Gorai.004G118000	1	1	Ribosomal protein L36e family protein	PF01158	PTHR10114	KOG3452			GO:0003735,GO:0006412,GO:0005622,GO:0005840	AT3G53740.2
Gorai.004G120700	1	1	Homeobox-leucine zipper family protein / lipid-binding START domain-containing protein	PF01852,PF00046	PTHR24325:SF193,PTHR24325	KOG0484			GO:0003700,GO:0043565,GO:0006355	AT4G00730.1	AHDP,ANL2
Gorai.004G121900	1	1	vacuolar protein sorting 26A	PF03643	PTHR12233	KOG3063			GO:0007034,GO:0030904	AT5G53530.1	VPS26A
Gorai.004G122200	1	1	Rhodanese/Cell cycle control phosphatase superfamily protein	PF00581	PTHR13253,PTHR13253:SF10	KOG1530				AT4G27700.1
Gorai.004G124100	1	1								AT5G53620.1
Gorai.004G127300	1	1	ARM repeat superfamily protein		PTHR13366	KOG4535				AT4G38120.1
Gorai.004G127700	1	1	Ribosomal protein L6 family	PF00347	PTHR11655:SF2,PTHR11655	KOG3255		K02940	GO:0003735,GO:0019843,GO:0006412,GO:0005840	AT1G33140.1	PGY2
Gorai.004G128900	1	1	CTC-interacting domain 11	PF07145,PF00076	PTHR24011,PTHR24011:SF187	KOG0131			GO:0003676	AT1G32790.1	CID11
Gorai.004G130200	1	1	oligopeptide transporter 7	PF03169	PTHR22601	KOG2262			GO:0055085	AT4G10770.1	ATOPT7,OPT7
Gorai.004G131300	1	1	carbon-nitrogen hydrolase family protein	PF02540,PF00795	PTHR23090	KOG2303	6.3.5.1	K01950	GO:0016810,GO:0006807	AT1G55090.1
Gorai.004G131400	1	1	Heat shock protein 70 (Hsp 70) family protein	PF00012	PTHR19375	KOG0100		K09490	GO:0000902,GO:0005524	AT5G42020.1	BIP,BIP2
Gorai.004G132500	1	1	alpha/beta-Hydrolases superfamily protein	PF01764					GO:0004806,GO:0006629	AT4G10955.1
Gorai.004G135700	1	1	cytokinin response factor 2	PF00847					GO:0003700,GO:0006355	AT4G23750.1	CRF2,TMO3
Gorai.004G137800	1	1	isoprenoid F	PF02542			4.6.1.12	K01770	GO:0008685,GO:0016114	AT1G63970.1	ISPF,MECPS
Gorai.004G138400	1	1	RNA binding Plectin/S10 domain-containing protein	PF03501	PTHR12146	KOG3344		K02947		AT4G25740.1
Gorai.004G142500	1	1	alpha/beta-Hydrolases superfamily protein	PF12146	PTHR11614,PTHR11614:SF20	KOG1455				AT3G62860.1
Gorai.004G143300	1	1	thioredoxin family protein	PF07749,PF00085	PTHR18929	KOG0191	5.3.4.1	K09584	GO:0045454,GO:0005783	AT2G47470.1	ATPDI11,ATPDIL2-1,MEE30,PDI11,UNE5
Gorai.004G144400	1	1	Cytochrome c oxidase subunit Vc family protein	PF05799					GO:0055114,GO:0005746,GO:0004129	AT5G61310.1
Gorai.004G144800	1	1	Carbohydrate-binding-like fold		PTHR23303:SF5,PTHR23303	KOG1948				AT3G62360.1
Gorai.004G152500	1	1	Rhodanese/Cell cycle control phosphatase superfamily protein		PTHR11177:SF3,PTHR11177					AT3G25480.1
Gorai.004G154700	1	1	S-adenosyl-L-methionine-dependent methyltransferases superfamily protein	PF03141	PTHR10108,PTHR10108:SF434				GO:0008168	AT4G01240.1
Gorai.004G154800	1	1	RING/U-box superfamily protein	PF00097	PTHR14155,PTHR14155:SF23					AT3G61550.1
Gorai.004G155900	1	1	P-loop containing nucleoside triphosphate hydrolases superfamily protein	PF02374	PTHR10803	KOG2825	3.6.3.16	K01551		AT1G01910.1
Gorai.004G158500	1	1	alpha/beta-Hydrolases superfamily protein	PF03893,PF01764	PTHR21493,PTHR21493:SF1	KOG2088			GO:0004806,GO:0006629,GO:0004091,GO:0016042	AT3G49050.1
Gorai.004G158900	1	1	SKP1-like 21	PF01466	PTHR11165,PTHR11165:SF5				GO:0006511	AT3G61415.1	ASK21,SK21
Gorai.004G160600	1	1	dihydrodipicolinate synthase	PF00701	PTHR12128		4.2.1.52	K01714	GO:0016829,GO:0008152	AT2G45440.1	DHDPS2
Gorai.004G161600	1	1								AT3G60810.1
Gorai.004G162800	1	1	RAS associated with diabetes protein 51C	PF08423	PTHR22942,PTHR22942:SF14	KOG1434			GO:0003678,GO:0005524,GO:0006260	AT2G45280.1	ATRAD51C,RAD51C
Gorai.004G166600	1	1	Nucleoside diphosphate kinase family protein	PF00334	PTHR11349	KOG0888	2.7.4.6	K00940	GO:0004550,GO:0005524,GO:0006165,GO:0006183,GO:0006228,GO:0006241	AT4G09320.1	NDPK1
Gorai.004G167200	1	1	Arabidopsis RAC-like 9	PF00071	PTHR24072	KOG0393		K07975	GO:0005525,GO:0007264,GO:0005622	AT2G44690.1	ARAC9,ATROP8,ROP8
Gorai.004G167500	1	1	Zinc-binding ribosomal protein family protein	PF01780	PTHR11517	KOG0402		K02921	GO:0003735,GO:0006412,GO:0005622,GO:0005840	AT3G10950.1
Gorai.004G170600	1	1	WD-40 repeat family protein / notchless protein, putative	PF00400,PF08154	PTHR19848	KOG0271			GO:0005515	AT5G52820.1
Gorai.004G171200	1	1	Protein of unknown function, DUF642	PF04862						AT3G08030.1
Gorai.004G171700	1	1	FMN-linked oxidoreductases superfamily protein	PF01207	PTHR11082,PTHR11082:SF18	KOG2335	1.-.-.-	K05539	GO:0017150,GO:0050660,GO:0008033,GO:0055114	AT3G63510.1
Gorai.004G171800	1	1	Photosystem II 5 kD protein							AT1G51400.1
Gorai.004G174000	1	1	AGAMOUS-like 26	PF00588	PTHR12029:SF26,PTHR12029				GO:0003723,GO:0008173,GO:0006396,GO:0008168	AT5G26880.2	AGL26
Gorai.004G174400	1	1	tetratricopeptide repeat (TPR)-containing protein	PF05303	PTHR12601	KOG1839				AT3G52140.1
Gorai.004G176500	1	1	RHO guanyl-nucleotide exchange factor 14	PF03759					GO:0005089	AT1G31650.1	ATROPGEF14,ROPGEF14
Gorai.004G177900	1	1	SWIB/MDM2 domain superfamily protein	PF02201	PTHR13844				GO:0005515	AT2G35605.1
Gorai.004G178400	1	1	Protein of unknown function, DUF647	PF04884	PTHR12770,PTHR12770:SF7	KOG4249				AT3G45890.1	RUS1
Gorai.004G179300	1	1		PF04819	PTHR16007,PTHR16007:SF5					AT1G32120.1
Gorai.004G179600	1	1	ENHANCED DISEASE RESISTANCE 2	PF01852,PF07059	PTHR12136:SF13,PTHR12136	KOG2761				AT4G19040.1	EDR2
Gorai.004G180500	1	1	Ribosomal protein L35	PF01632					GO:0003735,GO:0006412,GO:0005622,GO:0005840	AT5G45590.1
Gorai.004G181500	1	1	extra-large GTP-binding protein 3	PF00503	PTHR10218,PTHR10218:SF90	KOG0082			GO:0004871,GO:0019001,GO:0007186	AT1G31930.1	XLG3
Gorai.004G183000	1	1								AT2G35470.1
Gorai.004G185600	1	1	Phosphatidylinositol N-acetylglucosaminyltransferase, GPI19/PIG-P subunit	PF08510	PTHR21726	KOG2257				AT2G39445.1
Gorai.004G186900	1	1	non-intrinsic ABC protein 6	PF01458				K09015	GO:0016226	AT1G32500.1	ATNAP6,NAP6
Gorai.004G187300	1	1	ent-kaurenoic acid hydroxylase 2	PF00067	PTHR24286,PTHR24286:SF24	KOG0157			GO:0005506,GO:0009055,GO:0016705,GO:0020037,GO:0055114	AT2G32440.1	ATKAO2,CYP88A4,KAO2
Gorai.004G189000	1	1	Haloacid dehalogenase-like hydrolase (HAD) superfamily protein	PF00702	PTHR18901	KOG2914			GO:0003824,GO:0008152	AT2G38740.1
Gorai.004G190400	1	1	Protein of unknown function (DUF581)	PF04570						AT5G47060.1
Gorai.004G190700	1	1	novel plant snare 11	PF03908	PTHR21230,PTHR21230:SF2	KOG1666		K08494		AT2G35190.1	ATNPSN11,NPSN11,NSPN11
Gorai.004G192200	1	1	Chlorophyll A-B binding family protein							AT5G47110.1	LIL3:2
Gorai.004G192600	1	1	Ankyrin repeat family protein	PF00023		KOG4412			GO:0005515	AT4G10720.1
Gorai.004G192700	1	1
Gorai.004G193700	1	1	Plant VAMP (vesicle-associated membrane protein) family protein	PF00635	PTHR10809,PTHR10809:SF6	KOG0439			GO:0005198	AT5G47180.1
Gorai.004G193900	1	1								AT4G17540.1
Gorai.004G194000	1	1	HXXXD-type acyl-transferase family protein	PF02458					GO:0016747	AT5G02890.1
Gorai.004G196800	1	1	myb domain protein 66	PF00249	PTHR10641				GO:0003677	AT5G14750.1	ATMYB66,MYB66,WER,WER1
Gorai.004G197200	1	1	Formyl transferase	PF00551,PF01842	PTHR10520:SF7,PTHR10520	KOG3076	3.5.1.10	K01433	GO:0016742,GO:0009058,GO:0016597,GO:0008152,GO:0008864,GO:0006189	AT4G17360.1
Gorai.004G197900	1	1	O-fucosyltransferase family protein	PF10250						AT4G16650.1
Gorai.004G198000	1	1								AT4G17310.1
Gorai.004G198300	1	1	C2H2-like zinc finger protein		PTHR11389,PTHR11389:SF378					AT3G60580.1
Gorai.004G203300	1	1								AT4G22758.1
Gorai.004G203700	1	1	AT-hook motif nuclear-localized protein 1	PF03479						AT4G12080.1	AHL1,ATAHL1
Gorai.004G207200	1	1	Glucose-methanol-choline (GMC) oxidoreductase family protein	PF05199,PF00732	PTHR11552:SF31,PTHR11552	KOG1238			GO:0016614,GO:0050660,GO:0055114	AT1G12570.1
Gorai.004G207700	1	1								AT4G23020.2
Gorai.004G210600	1	1	tubulin beta 8	PF03953,PF00091	PTHR11588	KOG1375		K07375	GO:0051258,GO:0043234,GO:0003924,GO:0005525,GO:0006184,GO:0007017,GO:0005874	AT5G23860.1	TUB8
Gorai.004G210900	1	1	C2 calcium/lipid-binding plant phosphoribosyltransferase family protein	PF00168,PF08372	PTHR10024:SF97,PTHR10024	KOG1028			GO:0005515	AT4G11610.1
Gorai.004G215400	1	1	EID1-like 3			KOG1571				AT3G63060.1	EDL3
Gorai.004G215700	1	1	Eukaryotic aspartyl protease family protein		PTHR13683,PTHR13683:SF100	KOG1339			GO:0006508,GO:0004190	AT1G03220.1
Gorai.004G218800	1	1	tryptophan synthase alpha chain	PF00290	PTHR10314,PTHR10314:SF4	KOG4175	4.2.1.20	K01695	GO:0004834,GO:0006568,GO:0000105,GO:0016765,GO:0009228	AT3G54640.1	TRP3,TSA1
Gorai.004G219100	1	1	galacturonosyltransferase 6	PF01501	PTHR13778:SF6,PTHR13778				GO:0016757	AT1G06780.1	GAUT6
Gorai.004G221000	1	1	translocase inner membrane subunit 44-2	PF04280	PTHR10721	KOG2580			GO:0015450,GO:0006886,GO:0005744	AT2G36070.1	ATTIM44-2,TIM44-2
Gorai.004G222400	1	1	translocase of outer membrane 22-V		PTHR12504					AT5G43970.1	ATTOM22-V,TOM22-V,TOM9-2
Gorai.004G223800	1	1	Translation elongation factor EF1B/ribosomal protein S6 family protein	PF00736	PTHR11595,PTHR11595:SF5	KOG1668		K03232	GO:0003746,GO:0006414,GO:0005853	AT2G18110.1
Gorai.004G224800	1	1
Gorai.004G226500	1	1	B-cell receptor-associated protein 31-like	PF05266,PF05529	PTHR12701:SF1,PTHR12701	KOG1962			GO:0006886,GO:0005783,GO:0016021	AT3G07190.1
Gorai.004G228300	1	1	Transducin/WD40 repeat-like superfamily protein	PF00400	PTHR19877	KOG0643		K03246	GO:0005515	AT2G46290.1
Gorai.004G228800	1	1								AT2G28430.1
Gorai.004G229100	1	1	Ribosomal protein L11 family protein	PF03946,PF00298	PTHR11661	KOG0886		K02870	GO:0003735,GO:0006412,GO:0005840	AT5G60670.1
Gorai.004G231700	1	1	Major facilitator superfamily protein	PF06813	PTHR21576,PTHR21576:SF8					AT2G28120.1
Gorai.004G231900	1	1
Gorai.004G232500	1	1	RAN binding protein 1	PF00638	PTHR23138,PTHR23138:SF10	KOG0864			GO:0046907	AT5G58590.1	RANBP1
Gorai.004G234600	1	1	mitochondrial 28S ribosomal protein S29-related	PF10236	PTHR12810	KOG3928				AT1G16870.1
Gorai.004G234700	1	1	Protein of unknown function (DUF567)	PF04525						AT2G30270.1
Gorai.004G235000	1	1	nodulin MtN21 /EamA-like transporter family protein	PF03151	PTHR11132	KOG1441			GO:0016020	AT1G06890.1
Gorai.004G235600	1	1	Noc2p family	PF03715	PTHR12687,PTHR12687:SF5	KOG2256				AT2G18220.1
Gorai.004G235700	1	1	Protein of unknown function, DUF538	PF04398						AT1G09310.1
Gorai.004G235800	1	1	importin alpha isoform 4	PF00514,PF01749	PTHR23316	KOG0166			GO:0005515,GO:0008565,GO:0006606,GO:0005634,GO:0005737,GO:0006886,GO:0005643	AT1G09270.1	IMPA-4
Gorai.004G236000	1	1		PF09597						AT5G26800.1
Gorai.004G236600	1	1	lon protease 1	PF00004,PF02190,PF05362	PTHR10046,PTHR10046:SF23	KOG2004	3.4.21.-	K08675	GO:0005524,GO:0004176,GO:0006508,GO:0004252,GO:0009378,GO:0006281,GO:0006310,GO:0016887	AT5G26860.1	LON1,LON_ARA_ARA
Gorai.004G237600	1	1	Chaperone DnaJ-domain superfamily protein	PF00226	PTHR24077,PTHR24077:SF66				GO:0031072	AT1G56300.1
Gorai.004G238100	1	1	eukaryotic translation initiation factor 3A	PF01399	PTHR14005	KOG2072		K03254	GO:0005515	AT4G11420.1	ATEIF3A-1,ATTIF3A1,EIF3A,EIF3A-1,TIF3A1
Gorai.004G239800	1	1	Heavy metal transport/detoxification superfamily protein	PF00403	PTHR22814,PTHR22814:SF16	KOG1603			GO:0046872,GO:0030001	AT5G27690.1
Gorai.004G240500	1	1	homolog of yeast sucrose nonfermenting 4	PF00571	PTHR13780:SF13,PTHR13780	KOG1764			GO:0005515	AT1G09020.1	ATSNF4,SNF4
Gorai.004G240800	1	1	zinc finger (Ran-binding) family protein	PF00641	PTHR23111,PTHR23111:SF19				GO:0008270,GO:0005622	AT1G55040.1
Gorai.004G241600	1	1	MIRO-related GTP-ase 1	PF08356,PF08477,PF08355	PTHR24072,PTHR24072:SF12	KOG1707			GO:0005525,GO:0007264,GO:0005622	AT5G27540.1	emb2473,MIRO1
Gorai.004G243600	1	1	Mitochondrial inner membrane translocase complex, subunit Tim44-related protein	PF04280					GO:0015450,GO:0006886,GO:0005744	AT5G27395.2
Gorai.004G244100	1	1	alpha/beta-Hydrolases superfamily protein	PF07859	PTHR23024:SF10,PTHR23024	KOG1515	3.-.-.-	K14493	GO:0016787,GO:0008152	AT5G27320.1	ATGID1C,GID1C
Gorai.004G244500	1	1	H/ACA ribonucleoprotein complex, subunit Gar1/Naf1 protein	PF04410	PTHR23237	KOG3262		K11128	GO:0030515,GO:0031120,GO:0042254,GO:0031429,GO:0009982	AT3G03920.1
Gorai.004G244600	1	1	evolutionarily conserved C-terminal region 2	PF04146	PTHR12357:SF6,PTHR12357	KOG1901				AT3G13460.1	ECT2
Gorai.004G245800	1	1	Protein prenylyltransferase superfamily protein		PTHR12760	KOG3060				AT3G04830.1
Gorai.004G249100	1	1			PTHR12596,PTHR12596:SF1	KOG4541				AT3G04490.1
Gorai.004G249500	1	1	Calcium-dependent lipid-binding (CaLB domain) family protein	PF00168					GO:0005515	AT2G33320.1
Gorai.004G249600	1	1	Haem oxygenase-like, multi-helical	PF03070	PTHR20858:SF7,PTHR20858					AT5G32470.1
Gorai.004G249700	1	1	Li-tolerant lipase 1	PF00657	PTHR22835,PTHR22835:SF39				GO:0016788,GO:0006629	AT3G04290.1	ATLTL1,LTL1
Gorai.004G250800	1	1	syntaxin of plants 131	PF00804,PF05739	PTHR19957:SF26,PTHR19957	KOG0810		K08486	GO:0016020,GO:0005515	AT3G03800.1	ATSYP131,SYP131
Gorai.004G251700	1	1	potassium channel tetramerisation domain-containing protein / pentapeptide repeat-containing protein	PF00805,PF02214	PTHR14958:SF5,PTHR14958	KOG1665			GO:0005249,GO:0006813,GO:0008076,GO:0016020	AT5G55000.2	FIP2
Gorai.004G253200	1	1	MATE efflux family protein	PF01554	PTHR11206:SF9,PTHR11206	KOG1347			GO:0015238,GO:0015297,GO:0006855,GO:0055085,GO:0016020	AT1G33110.1
Gorai.004G254900	1	1	yeast YAK1-related gene 1	PF00069	PTHR24058:SF120,PTHR24058	KOG0667			GO:0004672,GO:0005524,GO:0006468	AT5G35980.1	YAK1
Gorai.004G258100	1	1	P-loop containing nucleoside triphosphate hydrolases superfamily protein	PF12037,PF00004	PTHR23075	KOG0742			GO:0005524	AT3G03060.1
Gorai.004G260100	1	1	regulatory particle non-ATPase 12A	PF03399	PTHR12387	KOG3151		K03031	GO:0006508,GO:0005838	AT1G64520.1	RPN12a
Gorai.004G262400	1	1	GroES-like zinc-binding dehydrogenase family protein	PF00107,PF08240	PTHR11695,PTHR11695:SF310	KOG0022	1.1.1.1	K00001	GO:0008270,GO:0016491,GO:0055114	AT5G24760.1
Gorai.004G262600	1	1	Class II aaRS and biotin synthetases superfamily protein	PF03129,PF00587	PTHR11476	KOG1936	6.1.1.21	K01892	GO:0000166,GO:0004812,GO:0005524,GO:0006418,GO:0005737,GO:0006412,GO:0006427,GO:0004821	AT3G02760.1
Gorai.004G262700	1	1	Pentatricopeptide repeat (PPR) superfamily protein	PF01535	PTHR24015,PTHR24015:SF102					AT1G25360.1
Gorai.004G263100	1	1	Translation protein SH3-like family protein	PF00467	PTHR11143	KOG3401		K02898	GO:0015934,GO:0006412,GO:0003735	AT3G49910.1
Gorai.004G264500	1	1	HXXXD-type acyl-transferase family protein	PF02458					GO:0016747	AT1G65450.1
Gorai.004G265100	1	1	RECQ helicase L2	PF00570,PF00271,PF09382,PF00270	PTHR13710:SF12,PTHR13710	KOG0353	3.6.4.12	K10899	GO:0003676,GO:0005524,GO:0008026,GO:0004386,GO:0005622,GO:0043140,GO:0006260,GO:0006281,GO:0006310	AT1G31360.1	ATRECQ2,MED34,RECQL2
Gorai.004G265300	1	1	Class I peptide chain release factor	PF00472	PTHR11075,PTHR11075:SF17	KOG3429			GO:0003747,GO:0006415	AT1G33330.1
Gorai.004G266200	1	1	RNA-binding (RRM/RBD/RNP motifs) family protein	PF00076	PTHR24011,PTHR24011:SF218	KOG0149			GO:0003676	AT1G33470.2
Gorai.004G268900	1	1	Ribosomal protein S19e family protein	PF01090	PTHR11710	KOG3411		K02966	GO:0003735,GO:0006412,GO:0005622,GO:0005840	AT5G61170.1
Gorai.004G270000	1	1		PF09770	PTHR21551					AT1G79090.1
Gorai.004G273200	1	1	Fatty acid hydroxylase superfamily	PF12076,PF04116	PTHR11863,PTHR11863:SF22				GO:0005506,GO:0016491,GO:0006633,GO:0055114	AT5G57800.1	CER3,FLP1,WAX2,YRE
Gorai.004G273700	1	1	Ubiquitin-like superfamily protein	PF00240	PTHR10666:SF55,PTHR10666	KOG4495			GO:0005515	AT5G57860.1
Gorai.004G274000	1	1	Alba DNA/RNA-binding protein	PF01918					GO:0003676	AT2G34160.1
Gorai.004G274200	1	1	overexpressor of cationic peroxidase 3	PF00046					GO:0003700,GO:0043565,GO:0006355	AT5G11270.1	OCP3
Gorai.004G275200	1	1	ribosomal protein S11-beta	PF00366	PTHR10744	KOG1728		K02949	GO:0003735,GO:0006412,GO:0005622,GO:0005840	AT5G23740.1	RPS11-BETA
Gorai.004G276500	1	1	myb domain protein 82	PF00249	PTHR10641	KOG0048			GO:0003677	AT5G52600.1	AtMYB82,MYB82
Gorai.004G277400	1	1	Ribosomal protein L7Ae/L30e/S12e/Gadd45 family protein	PF01248	PTHR23105:SF11,PTHR23105	KOG3387				AT5G20160.2
Gorai.004G282900	1	1	Zn-dependent exopeptidases superfamily protein	PF02127	PTHR10761	KOG2596	3.4.11.21	K01267	GO:0004177,GO:0008270,GO:0006508	AT5G60160.1
Gorai.004G283000	1	1	Zinc finger C-x8-C-x5-C-x3-H type family protein		PTHR14493	KOG1595				AT4G29190.1
Gorai.004G284500	1	1	hydroxyproline-rich glycoprotein family protein							AT5G57070.1
Gorai.004G284600	1	1	phospholipid:diacylglycerol acyltransferase	PF02450	PTHR11440,PTHR11440:SF6				GO:0008374,GO:0006629,GO:0004607	AT5G13640.1	ATPDAT,PDAT,PDAT1
Gorai.004G286900	1	1	Fatty acid/sphingolipid desaturase	PF00173,PF00487	PTHR19353	KOG4232			GO:0020037,GO:0006629,GO:0055114,GO:0016491	AT2G46210.1
Gorai.004G288600	1	1	Protein of unknown function (DUF810)	PF05664						AT2G25800.1
Gorai.004G290800	1	1	Peroxisomal membrane 22 kDa (Mpv17/PMP22) family protein	PF04117	PTHR11266	KOG1944			GO:0016021	AT3G24570.1
Gorai.004G291000	1	1	Ribosomal protein L39 family protein	PF00832	PTHR19970	KOG0002		K02924	GO:0003735,GO:0006412,GO:0005622,GO:0005840	AT4G31985.1
Gorai.004G291200	1	1	Calmodulin-binding protein	PF07887						AT2G24300.2
Gorai.004G293900	1	1	S-adenosyl-L-methionine-dependent methyltransferases superfamily protein	PF08704	PTHR12133				GO:0016429,GO:0030488	AT5G14600.1
Gorai.005G001600	1	1								AT5G01015.1
Gorai.005G002200	1	1	Tetratricopeptide repeat (TPR)-like superfamily protein	PF01535	PTHR24015,PTHR24015:SF20					AT2G37230.1
Gorai.005G002300	1	1	RNA-binding KH domain-containing protein		PTHR11208,PTHR11208:SF25	KOG1588				AT2G38610.1
Gorai.005G004000	1	1	Transmembrane proteins 14C	PF03647		KOG4267			GO:0016020	AT2G38550.1
Gorai.005G006000	1	1	Plant protein of unknown function (DUF827)	PF05701						AT2G38370.1
Gorai.005G006400	1	1	D-mannose binding lectin protein with Apple-like carbohydrate-binding domain	PF01453	PTHR11795:SF81,PTHR11795				GO:0005529	AT3G51710.1
Gorai.005G007600	1	1	ACT domain-containing small subunit of acetolactate synthase protein	PF10369,PF01842		KOG2663	2.2.1.6	K01653	GO:0016597,GO:0008152	AT2G31810.1
Gorai.005G008600	1	1	Small nuclear ribonucleoprotein family protein	PF01423	PTHR11021	KOG1783				AT2G43810.1
Gorai.005G009100	1	1	chloroplast heat shock protein 70-2	PF00012	PTHR19375,PTHR19375:SF130	KOG0102		K03283	GO:0000902,GO:0005524	AT5G49910.1	cpHsc70-2,CPHSC70-2EAT SHOCK PROTEIN 70-2,HSC70-7
Gorai.005G010100	1	1	sacI homology domain-containing protein / WW domain-containing protein	PF02383,PF00397	PTHR11200:SF8,PTHR11200				GO:0005515,GO:0042578	AT3G59770.1	SAC9
Gorai.005G010900	1	1	F-box/RNI-like superfamily protein	PF00646,PF08387					GO:0005515	AT1G06630.2
Gorai.005G011400	1	1		PF07468
Gorai.005G012500	1	1	Eukaryotic translation initiation factor eIF2A family protein	PF08662	PTHR13227	KOG2315				AT1G73180.1
Gorai.005G015400	1	1	calreticulin 3	PF00262	PTHR11073	KOG0674			GO:0005509	AT1G08450.1	AtCRT3,CRT3,EBS2,PSL1
Gorai.005G015500	1	1	glyoxalase 2-4	PF00753	PTHR11935,PTHR11935:SF7	KOG0813			GO:0016787	AT1G06130.2	GLX2-4
Gorai.005G017400	1	1	ARM repeat superfamily protein	PF08506,PF03810	PTHR10997:SF18,PTHR10997	KOG1991			GO:0008565,GO:0006886	AT2G31660.1	SAD2,URM9
Gorai.005G017900	1	1								AT4G08910.1
Gorai.005G020100	1	1	S-adenosyl-L-methionine-dependent methyltransferases superfamily protein	PF10294	PTHR21095	KOG2920				AT2G43320.1
Gorai.005G021000	1	1	Immunoglobulin E-set superfamily protein	PF02115	PTHR10980,PTHR10980:SF2	KOG3205			GO:0005094,GO:0005737	AT3G07880.1	SCN1
Gorai.005G022200	1	1	Nucleic acid-binding proteins superfamily	PF00575	PTHR10287				GO:0003723	AT3G23700.1
Gorai.005G022300	1	1	RAB GTPase homolog A5D	PF00071	PTHR24073,PTHR24073:SF213	KOG0087		K07976	GO:0005525,GO:0007264,GO:0005622	AT2G31680.1	AtRABA5d,RABA5d
Gorai.005G022400	1	1	basic helix-loop-helix (bHLH) DNA-binding superfamily protein	PF00010	PTHR12565,PTHR12565:SF7				GO:0030528,GO:0006355	AT3G07340.1
Gorai.005G022700	1	1	Sec23/Sec24 protein transport family protein	PF00626,PF04810,PF04811,PF08033,PF04815	PTHR11141	KOG1986		K14006	GO:0008270,GO:0006886,GO:0006888,GO:0030127	AT1G05520.1
Gorai.005G025000	1	1	xyloglucan endotransglucosylase/hydrolase 16	PF00722,PF06955					GO:0004553,GO:0005975,GO:0016762,GO:0006073,GO:0005618,GO:0048046	AT3G23730.1	XTH16
Gorai.005G026700	1	1	Leucine-rich repeat protein kinase family protein	PF00069,PF00560,PF08263	PTHR24420,PTHR24420:SF467	KOG1187			GO:0004672,GO:0005524,GO:0006468,GO:0005515	AT3G23750.1
Gorai.005G027600	1	1	ralf-like 31	PF05498						AT4G13950.1	RALFL31
Gorai.005G027800	1	1	DNA repair-recombination protein (RAD50)	PF04423	PTHR18867	KOG0962	3.6.-.-	K10866	GO:0004518,GO:0005524,GO:0008270,GO:0006281	AT2G31970.1	ATRAD50,RAD50
Gorai.005G028000	1	1	UDP-D-glucuronate 4-epimerase 6	PF01370	PTHR10366,PTHR10366:SF42	KOG1371	5.1.3.6	K08679	GO:0016491,GO:0008152,GO:0003854,GO:0016616,GO:0006694,GO:0055114,GO:0003824,GO:0050662,GO:0044237,GO:0009058,GO:0008831,GO:0045226	AT3G23820.1	GAE6
Gorai.005G028100	1	1	glycine-rich RNA-binding protein 2	PF00076	PTHR24012	KOG0114			GO:0003676	AT4G13850.1	ATGRP2,GR-RBP2,GRP2
Gorai.005G030300	1	1	Alkaline phytoceramidase (aPHC)	PF05875	PTHR12956:SF4,PTHR12956	KOG2329	3.5.1.-	K04711	GO:0016811,GO:0006672,GO:0016021	AT4G22330.1	ATCES1
Gorai.005G031300	1	1	Tetratricopeptide repeat (TPR)-like superfamily protein	PF01535	PTHR24015,PTHR24015:SF85					AT1G04840.1
Gorai.005G033900	1	1	Homeodomain-like superfamily protein	PF00249					GO:0003677	AT3G24120.2
Gorai.005G041200	1	1	Glycoprotein membrane precursor GPI-anchored							AT3G06035.1
Gorai.005G042100	1	1	Copper amine oxidase family protein	PF01179,PF02728,PF02727	PTHR10638,PTHR10638:SF12	KOG1186			GO:0005507,GO:0008131,GO:0048038,GO:0009308,GO:0055114	AT1G31710.1
Gorai.005G045000	1	1	Ribosomal protein S3Ae	PF01015	PTHR11830	KOG1628		K02984	GO:0003735,GO:0006412,GO:0005622,GO:0005840	AT4G34670.1
Gorai.005G045900	1	1
Gorai.005G046400	1	1	AUX/IAA transcriptional regulator family protein	PF02309					GO:0006355,GO:0005634	AT5G43700.1	ATAUX2-11,IAA4
Gorai.005G046600	1	1								AT5G43680.1
Gorai.005G046800	1	1	cytosolic ribosomal protein S15	PF00203	PTHR11880	KOG0898		K02958	GO:0003735,GO:0006412,GO:0005840	AT1G04270.1	RPS15
Gorai.005G047200	1	1	SMAD/FHA domain-containing protein	PF00498	PTHR23308:SF2,PTHR23308				GO:0005515	AT3G02400.1
Gorai.005G048100	1	1	Protein of unknown function (DUF668)	PF11961,PF05003						AT3G23160.1
Gorai.005G051000	1	1	Ribosomal protein L14	PF01929	PTHR11127	KOG3421		K02875	GO:0003735,GO:0006412,GO:0005622,GO:0005840	AT4G27090.1
Gorai.005G053300	1	1	Ribosomal protein L14p/L23e family protein	PF00238	PTHR11761	KOG0901		K02894	GO:0003735,GO:0006412,GO:0005840	AT3G04400.1	emb2171
Gorai.005G054100	1	1	Nuclear transport factor 2 (NTF2) family protein with RNA binding (RRM-RBD-RNP motifs) domain	PF00076,PF02136	PTHR10693:SF8,PTHR10693	KOG0116			GO:0003676,GO:0006810,GO:0005622	AT5G43960.1
Gorai.005G054400	1	1	Sec20 family protein	PF03908	PTHR12825			K08497		AT3G24315.1	AtSec20
Gorai.005G056700	1	1								AT3G62450.1
Gorai.005G060200	1	1	ralf-like 33	PF05498						AT4G15800.1	RALFL33
Gorai.005G060300	1	1	heat shock factor binding protein	PF06825						AT4G15802.1	AtHSBP,HSBP
Gorai.005G062000	1	1	Ribosomal protein L19e family protein	PF01280	PTHR10722	KOG1696		K02885	GO:0003735,GO:0006412,GO:0005622,GO:0005840	AT3G16780.1
Gorai.005G066000	1	1	Ribosomal L29e protein family	PF01779	PTHR12884	KOG3504			GO:0003735,GO:0006412,GO:0005622,GO:0005840	AT3G06680.1
Gorai.005G069700	1	1	calcium-dependent lipid-binding family protein	PF06101,PF06650	PTHR16166,PTHR16166:SF69	KOG1809			GO:0008104	AT1G48090.1
Gorai.005G070800	1	1	NAD(P)-binding Rossmann-fold superfamily protein	PF00106	PTHR24319:SF102,PTHR24319	KOG1208			GO:0016491,GO:0008152	AT5G04070.1
Gorai.005G070900	1	1	ARM repeat superfamily protein	PF08506,PF03810	PTHR10997:SF23,PTHR10997	KOG1991			GO:0008565,GO:0006886	AT3G17340.1
Gorai.005G071900	1	1	Fcf2 pre-rRNA processing protein	PF08698	PTHR21686:SF3,PTHR21686	KOG3100				AT5G30495.1
Gorai.005G072600	1	1	ribosomal protein L3 plastid	PF00297	PTHR11229	KOG3141			GO:0003735,GO:0006412,GO:0005622,GO:0005840	AT3G17465.1	RPL3P
Gorai.005G074800	1	1	Protein of unknown function (DUF616)	PF04765	PTHR12956:SF2,PTHR12956					AT4G09630.1
Gorai.005G076400	1	1	MA3 domain-containing protein	PF02847	PTHR12626	KOG0403				AT1G22730.1
Gorai.005G077200	1	1	Ribosomal protein S13/S18 family	PF00416	PTHR10871	KOG3311		K02964	GO:0003723,GO:0003735,GO:0006412,GO:0005622,GO:0005840	AT1G34030.1
Gorai.005G079300	1	1	exocyst complex component sec5		PTHR13043	KOG2347				AT1G76850.1	SEC5A
Gorai.005G079400	1	1	Ubiquitin carboxyl-terminal hydrolase family protein	PF11955						AT2G31290.1
Gorai.005G080000	1	1	ACT-like protein tyrosine kinase family protein	PF07714,PF01842	PTHR23257:SF82,PTHR23257	KOG0192			GO:0004672,GO:0005524,GO:0006468,GO:0016597,GO:0008152	AT4G35780.1
Gorai.005G082200	1	1
Gorai.005G083500	1	1	sequence-specific DNA binding transcription factors	PF01172,PF09377	PTHR10927	KOG2917		K14574	GO:0042254,GO:0045727	AT1G43860.1
Gorai.005G083600	1	1	Polynucleotidyl transferase, ribonuclease H-like superfamily protein	PF00929	PTHR12801	KOG2248	3.1.-.-	K14570		AT5G25800.1
Gorai.005G084000	1	1	plantacyanin	PF02298					GO:0005507,GO:0009055	AT2G02850.1	ARPN
Gorai.005G084500	1	1	hydrolases, acting on acid anhydrides, in phosphorus-containing anhydrides;ATP-dependent helicases;nucleic acid binding;ATP binding;RNA binding;helicases	PF00271,PF08147,PF00270	PTHR24031,PTHR24031:SF17	KOG0337			GO:0003676,GO:0005524,GO:0008026,GO:0004386,GO:0003723,GO:0016818,GO:0005634	AT1G77030.1
Gorai.005G088700	1	1	proteasome beta subunit C1	PF00227	PTHR11599:SF7,PTHR11599	KOG0180			GO:0004298,GO:0051603,GO:0005839	AT1G21720.1	PBC1
Gorai.005G090000	1	1	Adenine nucleotide alpha hydrolases-like superfamily protein	PF00582					GO:0006950	AT1G44760.1
Gorai.005G093100	1	1	Pollen Ole e 1 allergen and extensin family protein	PF01190						AT4G08685.1	SAH7
Gorai.005G094000	1	1								AT1G78170.1
Gorai.005G095600	1	1	Tetratricopeptide repeat (TPR)-like superfamily protein	PF01535	PTHR24015,PTHR24015:SF182					AT1G08070.1	OTP82
Gorai.005G098700	1	1	growth-regulating factor 1	PF08879,PF08880					GO:0005515,GO:0005524,GO:0016818,GO:0006355,GO:0005634	AT2G22840.1	AtGRF1,GRF1
Gorai.005G099800	1	1								AT5G43150.1
Gorai.005G100500	1	1	RING/U-box superfamily protein			KOG4172				AT2G38185.1
Gorai.005G101400	1	1	WUSCHEL related homeobox 4	PF00046					GO:0003700,GO:0043565,GO:0006355	AT1G46480.1	WOX4
Gorai.005G108100	1	1	Major facilitator superfamily protein	PF00083	PTHR24063,PTHR24063:SF74	KOG0254			GO:0022857,GO:0055085,GO:0016021	AT1G75220.1
Gorai.005G111200	1	1	Histone superfamily protein	PF00125	PTHR11426	KOG1745		K11253	GO:0003677,GO:0006334,GO:0000786	AT4G40030.2
Gorai.005G112200	1	1	Calcium-dependent lipid-binding (CaLB domain) family protein	PF00168	PTHR10774:SF2,PTHR10774				GO:0005515	AT1G20080.1	ATSYTB,NTMC2T1.2,NTMC2TYPE1.2,SYT2,SYTB
Gorai.005G112500	1	1	RAC-like 3	PF00071	PTHR24072:SF353,PTHR24072	KOG0393			GO:0003924,GO:0005525,GO:0007264,GO:0005622	AT4G35020.1	ARAC3,ATROP6,RAC3,RHO1PS,ROP6
Gorai.005G113100	1	1	BR-signaling kinase 1	PF07714	PTHR24420:SF885,PTHR24420	KOG1187	2.7.11.1	K14500	GO:0004672,GO:0005524,GO:0006468	AT4G35230.1	BSK1
Gorai.005G113700	1	1	Nucleotide-diphospho-sugar transferases superfamily protein	PF00535	PTHR10859	KOG2978	2.4.1.83	K00721		AT1G20575.1
Gorai.005G114100	1	1	Plant U-Box 15	PF04564,PF05804	PTHR23315:SF7,PTHR23315				GO:0005515,GO:0004842,GO:0016567,GO:0000151	AT5G42340.1	PUB15
Gorai.005G114300	1	1	DNA-binding bromodomain-containing protein	PF00439	PTHR22881,PTHR22881:SF3				GO:0005515	AT1G20670.1
Gorai.005G114900	1	1	Ribophorin I	PF04597	PTHR21049	KOG2291		K12666	GO:0004579,GO:0006486,GO:0005783,GO:0016021	AT1G76400.1
Gorai.005G116100	1	1	acetyl Co-enzyme a carboxylase biotin carboxylase subunit	PF02785,PF02786,PF00289	PTHR18866,PTHR18866:SF55		6.3.4.14,6.4.1.2	K01961	GO:0003824,GO:0008152,GO:0016874,GO:0005524,GO:0008716	AT5G35360.1	CAC2
Gorai.005G117600	1	1	cobalt ion binding							AT1G71310.1
Gorai.005G118400	1	1	Transducin/WD40 repeat-like superfamily protein	PF00400	PTHR19865	KOG0299			GO:0005515	AT4G05410.1	YAO
Gorai.005G119100	1	1	Coatomer epsilon subunit	PF04733	PTHR10805	KOG3081			GO:0005198,GO:0006890,GO:0030126	AT1G30630.1
Gorai.005G119600	1	1	Protein of unknown function, DUF647	PF04884	PTHR12770,PTHR12770:SF6	KOG4249				AT5G49820.1	EMB1879,RUS6
Gorai.005G120200	1	1	MBOAT (membrane bound O-acyl transferase) family protein	PF03062	PTHR13906:SF4,PTHR13906	KOG2704				AT1G12640.1
Gorai.005G121600	1	1	fatty acid hydroxylase 1	PF04116	PTHR12863	KOG0539			GO:0005506,GO:0016491,GO:0006633,GO:0055114	AT2G34770.1	ATFAH1,FAH1
Gorai.005G123800	1	1	5\'-3\' exonuclease family protein	PF02739,PF01367	PTHR10133				GO:0003677,GO:0003824,GO:0008409	AT3G52050.1
Gorai.005G123900	1	1	lysyl-tRNA synthetase 1	PF00152,PF01336	PTHR22594,PTHR22594:SF4	KOG1885	6.1.1.6	K04567	GO:0000166,GO:0004812,GO:0005524,GO:0006418,GO:0005737,GO:0003676,GO:0006412	AT3G11710.1	ATKRS-1
Gorai.005G124400	1	1	Signal recognition particle, SRP9/SRP14 subunit	PF02290	PTHR12013	KOG1761		K03104	GO:0008312,GO:0030942,GO:0006614,GO:0005786	AT2G43640.1
Gorai.005G125000	1	1	Phosphoglycerate mutase, 2,3-bisphosphoglycerate-independent	PF01676,PF06415		KOG4513	5.4.2.1	K01834	GO:0003824,GO:0046872,GO:0004619,GO:0030145,GO:0006007,GO:0005737	AT1G09780.1
Gorai.005G125900	1	1	SNARE-like superfamily protein	PF04628	PTHR12403	KOG3487			GO:0006888,GO:0005801,GO:0005622	AT1G80500.1
Gorai.005G126100	1	1	Ypt/Rab-GAP domain of gyp1p superfamily protein	PF00566	PTHR22957:SF131,PTHR22957				GO:0005097,GO:0032313,GO:0005622	AT2G43490.6
Gorai.005G126400	1	1	Ribosomal L38e protein family	PF01781	PTHR10965	KOG3499		K02923	GO:0003735,GO:0006412,GO:0005622,GO:0005840	AT3G59540.1
Gorai.005G130000	1	1	ubiquitin-associated (UBA)/TS-N domain-containing protein	PF09409,PF00627	PTHR13020:SF20,PTHR13020	KOG2699			GO:0005515	AT1G04850.1
Gorai.005G130900	1	1	Ribosomal protein L13 family protein	PF00572	PTHR11545	KOG3204			GO:0003735,GO:0006412,GO:0005840	AT5G48760.1
Gorai.005G133300	1	1	Molecular chaperone Hsp40/DnaJ family protein	PF00684,PF00226,PF01556	PTHR24076:SF80,PTHR24076	KOG0715			GO:0031072,GO:0051082,GO:0006457	AT3G17830.1
Gorai.005G133700	1	1	D111/G-patch domain-containing protein	PF01585	PTHR13948,PTHR13948:SF20				GO:0003676,GO:0005622	AT4G34140.2
Gorai.005G134100	1	1	white-brown complex homolog protein 11	PF01061,PF00005	PTHR19241,PTHR19241:SF20	KOG0061			GO:0005524,GO:0016887,GO:0016020	AT1G17840.1	ABCG11,ATWBC11,COF1,DSO,WBC11
Gorai.005G138000	1	1	Di-glucose binding protein with Leucine-rich repeat domain	PF11721	PTHR24420					AT1G25570.1
Gorai.005G140100	1	1	Cyclophilin-like peptidyl-prolyl cis-trans isomerase family protein	PF00160	PTHR11071:SF17,PTHR11071	KOG0880			GO:0003755,GO:0006457	AT1G26940.1
Gorai.005G140400	1	1	Regulator of chromosome condensation (RCC1) family with FYVE zinc finger domain	PF01363,PF08381,PF00415	PTHR22870:SF25,PTHR22870	KOG1427			GO:0046872	AT1G69710.1
Gorai.005G140800	1	1	sphingoid base hydroxylase 2	PF04116	PTHR11863,PTHR11863:SF3	KOG0874			GO:0005506,GO:0016491,GO:0006633,GO:0055114	AT1G14290.1	SBH2
Gorai.005G142200	1	1	expansin A15	PF01357,PF03330						AT2G03090.1	ATEXP15,ATEXPA15,ATHEXP ALPHA 1.3,EXP15,EXPA15
Gorai.005G142900	1	1	VH1-interacting kinase	PF00023,PF00069	PTHR23257:SF89,PTHR23257	KOG0192			GO:0005515,GO:0004672,GO:0005524,GO:0006468	AT1G14000.1	VIK
Gorai.005G146500	1	1	cytochrome B5 isoform A	PF00173	PTHR19359	KOG0537			GO:0020037	AT1G26340.1	ATCB5-A,B5 #6,CB5-A
Gorai.005G147800	1	1								AT2G03830.1	RGF8
Gorai.005G149600	1	1	NAD(P)-binding Rossmann-fold superfamily protein	PF00899	PTHR10953:SF29,PTHR10953	KOG2016		K04532	GO:0003824	AT1G05180.1	AXR1
Gorai.005G152400	1	1	UDP-Glycosyltransferase / trehalose-phosphatase family protein	PF02358,PF00982	PTHR10788	KOG1050			GO:0003824,GO:0005992	AT1G68020.2	ATTPS6,TPS6
Gorai.005G152700	1	1	PLATZ transcription factor family protein	PF04640						AT2G01818.1
Gorai.005G153400	1	1	hydroxyproline-rich glycoprotein family protein			KOG4176				AT1G14710.1
Gorai.005G155100	1	1								AT1G09290.1
Gorai.005G155200	1	1	LRR and NB-ARC domains-containing disease resistance protein	PF00931	PTHR23155	KOG4658			GO:0043531,GO:0006915,GO:0005524	AT3G14460.1
Gorai.005G155700	1	1	cysteine-rich RLK (RECEPTOR-like protein kinase) 14	PF00069,PF01657	PTHR24420:SF430,PTHR24420	KOG0198			GO:0004672,GO:0005524,GO:0006468	AT4G23220.1	CRK14
Gorai.005G162600	1	1	myb domain protein 4	PF00249	PTHR10641	KOG0048			GO:0003677	AT4G38620.1	ATMYB4,MYB4
Gorai.005G162700	1	1	Cupredoxin superfamily protein	PF00394,PF07731,PF07732	PTHR11709,PTHR11709:SF31				GO:0016491,GO:0055114,GO:0005507	AT1G23010.1	LPR1
Gorai.005G162800	1	1	Tetratricopeptide repeat (TPR)-like superfamily protein	PF01535	PTHR24015					AT1G71060.1
Gorai.005G164600	1	1	Squamosa promoter-binding protein-like (SBP domain) transcription factor family protein	PF03110					GO:0003677,GO:0005634	AT5G50670.1
Gorai.005G167100	1	1								AT1G67350.1
Gorai.005G168100	1	1	translocase outer membrane 20-2	PF06552	PTHR10790:SF9,PTHR10790				GO:0045040,GO:0005742	AT1G27390.1	TOM20-2
Gorai.005G168700	1	1			PTHR13000	KOG3091				AT1G24310.1
Gorai.005G169000	1	1		PF06842	PTHR13229	KOG3808				AT5G20165.1
Gorai.005G169300	1	1	ARM repeat superfamily protein	PF04564,PF05804	PTHR22849				GO:0004842,GO:0016567,GO:0000151	AT1G24330.1
Gorai.005G169900	1	1	thioredoxin O1	PF00085	PTHR10438:SF14,PTHR10438	KOG0907			GO:0045454,GO:0015035,GO:0009055,GO:0006662	AT2G35010.1	ATO1,TO1
Gorai.005G172500	1	1	DNA-binding HORMA family protein	PF02301	PTHR11842:SF11,PTHR11842	KOG3285		K02537	GO:0007067	AT3G25980.1	MAD2
Gorai.005G174900	1	1	OSBP(oxysterol binding protein)-related protein 1D	PF01237,PF00169	PTHR10972,PTHR10972:SF8	KOG1737			GO:0005515,GO:0005543	AT1G13170.1	ORP1D
Gorai.005G176200	1	1								AT3G26350.1
Gorai.005G179700	1	1	anthranilate phosphoribosyltransferase, putative	PF02885	PTHR11922,PTHR11922:SF1					AT1G70570.1
Gorai.005G180000	1	1	Clathrin adaptor complexes medium subunit family protein	PF01217,PF00928	PTHR11998:SF11,PTHR11998	KOG0937		K12393	GO:0005515,GO:0006886,GO:0016192,GO:0030131	AT1G60780.1	HAP13
Gorai.005G181400	1	1	Pectin lyase-like superfamily protein	PF00295					GO:0004650,GO:0005975	AT1G60590.1
Gorai.005G182700	1	1								AT1G70350.1
Gorai.005G183200	1	1	ARM repeat superfamily protein	PF00514,PF04564	PTHR23315:SF31,PTHR23315				GO:0005515,GO:0004842,GO:0016567,GO:0000151	AT1G60190.1
Gorai.005G183500	1	1	spermidine synthase 1	PF01564	PTHR11558	KOG1562	2.5.1.16	K00797	GO:0003824	AT1G23820.1	SPDS1
Gorai.005G185000	1	1	TRICHOME BIREFRINGENCE-LIKE 27	PF03005	PTHR13533,PTHR13533:SF3					AT1G70230.1	TBL27
Gorai.005G187100	1	1	zinc ion binding	PF01753	PTHR12197,PTHR12197:SF93				GO:0008270	AT1G70150.1
Gorai.005G187700	1	1	pyruvate dehydrogenase complex E1 alpha subunit	PF00676	PTHR11516,PTHR11516:SF4	KOG0225	1.2.4.1	K00161	GO:0016624,GO:0008152,GO:0003824,GO:0030976	AT1G59900.1	AT-E1 ALPHA,E1 ALPHA
Gorai.005G188000	1	1	ARM repeat superfamily protein							AT1G27210.1
Gorai.005G191800	1	1	alpha/beta-Hydrolases superfamily protein	PF12146	PTHR11614,PTHR11614:SF20	KOG1455				AT1G77420.1
Gorai.005G195400	1	1	NAC domain containing protein 83	PF02365					GO:0003677,GO:0006355	AT5G13180.1	ANAC083,NAC083,VNI2
Gorai.005G196500	1	1	serine carboxypeptidase-like 45	PF00450	PTHR11802,PTHR11802:SF8	KOG1282			GO:0004185,GO:0006508	AT1G28110.1	SCPL45
Gorai.005G196700	1	1	ARF GTPase-activating protein	PF00169,PF00023,PF03114,PF01412	PTHR23180,PTHR23180:SF22	KOG0521			GO:0005515,GO:0005543,GO:0008060,GO:0008270,GO:0032312,GO:0005737	AT5G13300.1	AGD3,SFC,VAN3
Gorai.005G199700	1	1	nuclear fusion defective 6							AT2G20585.1	NFD6
Gorai.005G200000	1	1	Tyrosine transaminase family protein		PTHR11751,PTHR11751:SF28					AT5G36160.1
Gorai.005G201900	1	1	DTW domain-containing protein	PF03942						AT1G03687.1
Gorai.005G202100	1	1
Gorai.005G202700	1	1
Gorai.005G203400	1	1
Gorai.005G204800	1	1	Developmental regulator, ULTRAPETALA							AT4G28190.1	ULT,ULT1
Gorai.005G205300	1	1								AT2G20820.1
Gorai.005G206100	1	1	Wound-responsive family protein	PF12609						AT4G10265.1
Gorai.005G210000	1	1	Alanyl-tRNA synthetase	PF07973,PF01411	PTHR11777,PTHR11777:SF6	KOG0188	6.1.1.7	K01872	GO:0000166,GO:0004813,GO:0005524,GO:0006419,GO:0005737,GO:0016876,GO:0043039,GO:0006412	AT1G50200.1	ACD,ALATS
Gorai.005G210500	1	1	photosystem II stability/assembly factor, chloroplast (HCF136)	PF02012						AT5G23120.1	HCF136
Gorai.005G210900	1	1								AT5G23200.1
Gorai.005G211700	1	1	Tetratricopeptide repeat (TPR)-like superfamily protein	PF01535	PTHR24015					AT5G08310.1
Gorai.005G211900	1	1	TCP family transcription factor	PF03634	PTHR11584:SF275,PTHR11584					AT5G23280.1
Gorai.005G212000	1	1	pyrimidine d	PF01180	PTHR11938:SF7,PTHR11938	KOG1436	1.3.5.2	K00254	GO:0004152,GO:0006222,GO:0055114	AT5G23300.1	PYRD
Gorai.005G213000	1	1	Calcium-binding EF hand family protein	PF10591	PTHR10827,PTHR10827:SF13	KOG4223			GO:0005509,GO:0007165,GO:0005578	AT5G08580.1
Gorai.005G213300	1	1	translocase of the outer mitochondrial membrane 40	PF01459	PTHR10802	KOG3296		K11518	GO:0008308,GO:0006820,GO:0044070,GO:0055085,GO:0005741	AT3G20000.1	TOM40
Gorai.005G213800	1	1								AT5G08540.1
Gorai.005G213900	1	1	Radical SAM superfamily protein	PF04055	PTHR10949,PTHR10949:SF0	KOG2672	2.8.1.8	K03644	GO:0003824,GO:0051536,GO:0051539,GO:0016992,GO:0009107	AT5G08415.1
Gorai.005G214900	1	1	Nucleotide-sugar transporter family protein	PF03151	PTHR11132	KOG1441			GO:0016020,GO:0055085	AT1G21070.1
Gorai.005G216500	1	1	calmodulin-domain protein kinase 5	PF00069,PF00036	PTHR24349	KOG0032	2.7.11.1	K13412	GO:0004672,GO:0005524,GO:0006468,GO:0016773,GO:0009103,GO:0016020	AT4G35310.1	ATCPK5,CPK5
Gorai.005G217700	1	1	P-loop containing nucleoside triphosphate hydrolases superfamily protein	PF00350	PTHR11566:SF63,PTHR11566	KOG0446			GO:0003924,GO:0005525	AT3G19720.1	ARC5,DRP5B
Gorai.005G218700	1	1	Bifunctional inhibitor/lipid-transfer protein/seed storage 2S albumin superfamily protein	PF00234						AT5G64080.1
Gorai.005G221100	1	1	translocon at the outer membrane of chloroplasts 64-V	PF01425,PF00515	PTHR11895,PTHR11895:SF6	KOG1211			GO:0005515,GO:0016884	AT5G09420.1	ATTOC64-V,MTOM64,TOC64-V
Gorai.005G222600	1	1	general regulatory factor 2	PF00244	PTHR18860	KOG0841			GO:0019904	AT1G78300.1	14-3-3OMEGA,GF14 OMEGA,GRF2
Gorai.005G222800	1	1	LMBR1-like membrane protein	PF04791	PTHR21355	KOG2296				AT5G65290.1
Gorai.005G227300	1	1	oligopeptide transporter 4	PF03169	PTHR22601	KOG2262			GO:0055085	AT5G64410.1	ATOPT4,OPT4
Gorai.005G228400	1	1	Phosphatidylinositol 3- and 4-kinase family protein	PF00454,PF00613	PTHR10048	KOG0902	2.7.1.67	K00888	GO:0016773,GO:0035004,GO:0004428,GO:0048015,GO:0046854	AT1G49340.1	ATPI4K ALPHA
Gorai.005G228800	1	1	Quinone reductase family protein	PF03358		KOG3135			GO:0009055,GO:0016491,GO:0050662	AT4G36750.1
Gorai.005G229400	1	1	Inositol 1,3,4-trisphosphate 5/6-kinase family protein	PF05770	PTHR14217				GO:0000287,GO:0005524,GO:0047325,GO:0052725,GO:0052726,GO:0032957,GO:0005622,GO:0035300	AT4G33770.1
Gorai.005G231500	1	1	Radical SAM superfamily protein	PF04055					GO:0003824,GO:0051536	AT3G19630.1
Gorai.005G231600	1	1	Ribosomal protein L1p/L10e family	PF00687	PTHR23105,PTHR23105:SF5	KOG1570			GO:0003723,GO:0003735,GO:0006412,GO:0015934	AT2G42710.1
Gorai.005G232800	1	1	Regulator of Vps4 activity in the MVB pathway protein	PF02148					GO:0008270	AT2G14830.2
Gorai.005G234200	1	1	Auxin-responsive GH3 family protein	PF03321				K14487		AT2G14960.1	GH3.1
Gorai.005G235400	1	1	stress enhanced protein 1							AT4G34190.1	40786
Gorai.005G235500	1	1								AT2G01640.1
Gorai.005G235800	1	1	PTEN 2	PF10409	PTHR12305:SF8,PTHR12305	KOG2283	3.1.3.67	K01110	GO:0005515	AT3G19420.1	ATPEN2,PEN2
Gorai.005G235900	1	1	Granulin repeat cysteine protease family protein	PF00112,PF00396,PF08246	PTHR12411:SF44,PTHR12411	KOG1543			GO:0008234,GO:0006508	AT5G43060.1
Gorai.005G236300	1	1	Protein of unknown function (DUF579)	PF04669						AT5G67210.1
Gorai.005G236900	1	1	Ribosomal protein S5 domain 2-like superfamily protein	PF00380	PTHR21569	KOG1753		K02960	GO:0003735,GO:0006412,GO:0005622,GO:0005840	AT2G09990.1
Gorai.005G237600	1	1	Protein of unknown function (DUF1685)	PF07939						AT4G33985.1
Gorai.005G238200	1	1		PF08617	PTHR15840:SF4,PTHR15840					AT4G34412.1
Gorai.005G242800	1	1	RAB GTPase homolog G3F	PF00071	PTHR24073,PTHR24073:SF260	KOG0394		K07897	GO:0003924,GO:0005525,GO:0007264,GO:0005634,GO:0005737,GO:0005622	AT3G18820.1	ATRAB7B,ATRABG3F,RAB71,RAB7B,RABG3F
Gorai.005G242900	1	1	coatomer gamma-2 subunit, putative / gamma-2 coat protein, putative / gamma-2 COP, putative	PF08752,PF01602	PTHR10261	KOG1078			GO:0006886,GO:0016192,GO:0030117,GO:0005198,GO:0005798	AT4G34450.1
Gorai.005G243700	1	1	Alpha-helical ferredoxin	PF00037	PTHR10849	KOG3256	1.6.5.3,1.6.99.3	K03941	GO:0009055,GO:0051536	AT1G16700.1
Gorai.005G243800	1	1	Leucine-rich repeat protein kinase family protein	PF07714,PF00560	PTHR24420,PTHR24420:SF797	KOG1187			GO:0004672,GO:0005524,GO:0006468,GO:0005515	AT2G16250.1
Gorai.005G244100	1	1	3-ketoacyl-CoA synthase 4	PF08392,PF08541					GO:0016746,GO:0009058,GO:0016747,GO:0006633,GO:0016020,GO:0008610,GO:0004315	AT1G19440.1	KCS4
Gorai.005G244600	1	1	FtsJ-like methyltransferase family protein	PF01728,PF07780,PF11861	PTHR10920,PTHR10920:SF13	KOG1098			GO:0003676,GO:0008168,GO:0032259,GO:0006364,GO:0005634,GO:0001510	AT4G25730.1
Gorai.005G246000	1	1	myo-inositol monophosphatase like 2	PF00459	PTHR20854:SF12,PTHR20854	KOG2951			GO:0046854,GO:0004437	AT4G39120.1	HISN7,IMPL2
Gorai.005G246100	1	1
Gorai.005G247400	1	1	MATE efflux family protein	PF01554	PTHR11206:SF3,PTHR11206	KOG1347			GO:0015238,GO:0015297,GO:0006855,GO:0055085,GO:0016020	AT2G21340.1
Gorai.005G247600	1	1	MATE efflux family protein	PF01554	PTHR11206:SF3,PTHR11206	KOG1347			GO:0015238,GO:0015297,GO:0006855,GO:0055085,GO:0016020	AT2G21340.1
Gorai.005G252300	1	1	XAP5 family protein	PF04921	PTHR12722	KOG2894		K13119	GO:0005634	AT2G21150.1	XCT
Gorai.005G252900	1	1	Pentatricopeptide repeat (PPR-like) superfamily protein	PF01535	PTHR24015					AT2G21090.1
Gorai.005G253300	1	1	like AUXIN RESISTANT 2	PF01490	PTHR22950,PTHR22950:SF3	KOG1303		K13946		AT2G21050.1	LAX2
Gorai.005G256600	1	1	SAUR-like auxin-responsive protein family	PF02519						AT1G29500.1
Gorai.005G256700	1	1	SAUR-like auxin-responsive protein family	PF02519						AT1G29500.1
Gorai.005G260000	1	1	Late embryogenesis abundant (LEA) hydroxyproline-rich glycoprotein family	PF03168						AT2G01080.1
Gorai.005G262200	1	1	seryl-tRNA synthetase / serine--tRNA ligase	PF00587,PF02403	PTHR11778	KOG2509	6.1.1.11	K01875	GO:0000166,GO:0004812,GO:0005524,GO:0006418,GO:0005737,GO:0004828,GO:0006434,GO:0006412	AT5G27470.1
Gorai.005G265500	1	none
Gorai.005G267000	1	1	translation initiation factor 3B1	PF08662,PF00076	PTHR14068	KOG2314		K03253	GO:0003676,GO:0006413,GO:0003743,GO:0003723	AT5G27640.1	ATEIF3B-1,ATTIF3B1,EIF3B,EIF3B-1,TIF3B1
Gorai.005G267300	1	1	ribosomal protein S19	PF00203	PTHR11880,PTHR11880:SF1	KOG0899			GO:0003735,GO:0006412,GO:0005840	AT5G47320.1	RPS19
Gorai.005G268200	1	1	Ribosomal protein L7/L12, oligomerisation;Ribosomal protein L7/L12, C-terminal/adaptor protein ClpS-like	PF00542	PTHR11809:SF6,PTHR11809	KOG1715			GO:0003735,GO:0006412,GO:0005622,GO:0005840	AT1G70190.1
Gorai.005G268700	1	1								AT5G44650.1	AtCEST,CEST
Gorai.006G001000	1	1	Esterase/lipase/thioesterase family protein	PF00561,PF03982	PTHR22753:SF5,PTHR22753				GO:0016747	AT5G41130.1
Gorai.006G001300	1	1	phosphoenolpyruvate carboxylase 1	PF00311			4.1.1.31	K01595	GO:0008964,GO:0006099,GO:0015977	AT1G53310.1	ATPEPC1,ATPPC1,PEPC1,PPC1
Gorai.006G004600	1	1	aspartate aminotransferase 1	PF00155	PTHR11879	KOG1411	2.6.1.1	K14455	GO:0016740,GO:0030170,GO:0009058,GO:0016769,GO:0008483,GO:0006520	AT2G30970.1	ASP1
Gorai.006G006500	1	1	Ribosomal protein L1p/L10e family	PF00687	PTHR23105:SF3,PTHR23105	KOG1685			GO:0003723,GO:0003735,GO:0006412,GO:0015934	AT3G58660.1
Gorai.006G008600	1	1	MATE efflux family protein	PF01554	PTHR11206:SF47,PTHR11206	KOG1347			GO:0015238,GO:0015297,GO:0006855,GO:0055085,GO:0016020	AT3G59030.1	ATTT12,TT12
Gorai.006G009400	1	1	PHYTOENE SYNTHASE	PF00494		KOG1459			GO:0016740,GO:0009058	AT5G17230.1	PSY
Gorai.006G010200	1	1	chlororespiratory reduction 7	PF12095						AT5G39210.1	CRR7
Gorai.006G010600	1	1	alpha/beta-Hydrolases superfamily protein	PF00561	PTHR10992,PTHR10992:SF161	KOG1454				AT5G39220.1
Gorai.006G010700	1	1	Transducin/WD40 repeat-like superfamily protein	PF00400,PF08154	PTHR19855	KOG0313			GO:0005515	AT5G15550.1
Gorai.006G011100	1	1	biotin carboxyl carrier protein 2	PF00364	PTHR23151:SF25,PTHR23151			K02160		AT5G15530.1	BCCP2,CAC1-B
Gorai.006G011400	1	1	Tetratricopeptide repeat (TPR)-like superfamily protein	PF01535	PTHR24015					AT1G63130.1
Gorai.006G012400	1	1
Gorai.006G014300	1	1	EXS (ERD1/XPR1/SYG1) family protein	PF03105,PF03124	PTHR10783,PTHR10783:SF4	KOG1162			GO:0016021	AT3G29060.1
Gorai.006G017000	1	1	GAST1 protein homolog 4	PF02704						AT5G15230.1	GASA4
Gorai.006G017400	1	1	myb domain protein 96	PF00249	PTHR10641	KOG0048		K09422	GO:0003677	AT5G62470.2	ATMYB96,MYB96,MYBCOV1
Gorai.006G020700	1	1	Ribosomal protein S4	PF01479,PF00163	PTHR11831,PTHR11831:SF3	KOG3301		K02997	GO:0019843,GO:0005622,GO:0003723	AT5G39850.1
Gorai.006G022000	1	1	Glutaredoxin family protein	PF00462	PTHR10168:SF44,PTHR10168	KOG2824			GO:0009055,GO:0015035,GO:0045454	AT5G39865.1
Gorai.006G025800	1	1	Small GTP-binding protein	PF06421,PF00679,PF00009	PTHR23115,PTHR23115:SF40	KOG0462			GO:0003924,GO:0005525	AT5G39900.1
Gorai.006G028000	1	1	ferredoxin thioredoxin reductase catalytic beta chain family protein	PF02943					GO:0008937,GO:0055114	AT2G04700.1
Gorai.006G029000	1	1	RING/U-box superfamily protein	PF00097	PTHR14155,PTHR14155:SF26	KOG1493				AT5G40250.1
Gorai.006G032100	1	1	polyribonucleotide nucleotidyltransferase, putative	PF01138,PF03726,PF00575,PF03725,PF00013	PTHR11252	KOG1067	2.7.7.8	K00962	GO:0003723,GO:0006396,GO:0000175,GO:0006402,GO:0004654	AT5G14580.1
Gorai.006G033800	1	1	embryo defective 3012	PF02368	PTHR23019			K14314		AT5G40480.1	EMB3012
Gorai.006G033900	1	1	embryo defective 3012							AT5G40480.1	EMB3012
Gorai.006G034200	1	1	D6 protein kinase like 2	PF00069	PTHR24351,PTHR24351:SF88	KOG0610	2.7.11.-	K08286	GO:0004672,GO:0005524,GO:0006468	AT5G47750.1	D6PKL2,PK5
Gorai.006G037900	1	1	DHHC-type zinc finger family protein	PF01529	PTHR22883	KOG1311			GO:0008270	AT3G26935.1
Gorai.006G040700	1	1
Gorai.006G041900	1	1	translocase of outer membrane 20 kDa subunit 3	PF06552	PTHR10790:SF9,PTHR10790				GO:0045040,GO:0005742	AT3G27080.1	TOM20-3
Gorai.006G044500	1	1	ENTH/VHS family protein	PF04818	PTHR12460	KOG2669				AT3G26990.1
Gorai.006G044900	1	1	DHHC-type zinc finger family protein	PF01529	PTHR22883	KOG1311			GO:0008270	AT3G26935.1
Gorai.006G045000	1	none
Gorai.006G051300	1	1	RNA binding Plectin/S10 domain-containing protein	PF03501	PTHR12146	KOG3344		K02947		AT4G25740.1
Gorai.006G053100	1	1	myosin XI B	PF00612,PF00063,PF01843	PTHR13140	KOG0160			GO:0003774,GO:0005524,GO:0016459,GO:0005515	AT1G04160.1	ATXIB,XI-8,XI-B,XIB
Gorai.006G053400	1	1	mitochondrial editing factor 18	PF01535	PTHR24015,PTHR24015:SF111					AT5G19020.1	MEF18
Gorai.006G056600	1	1	protein tyrosine kinase family protein	PF07714	PTHR23257:SF80,PTHR23257	KOG0192			GO:0004672,GO:0005524,GO:0006468	AT1G73660.1
Gorai.006G059100	1	1	Bifunctional inhibitor/lipid-transfer protein/seed storage 2S albumin superfamily protein	PF00234						AT3G18280.1
Gorai.006G060200	1	1	Ribosomal protein S7e family protein	PF01251	PTHR11278	KOG3320		K02993	GO:0003735,GO:0006412,GO:0005622,GO:0005840	AT1G48830.1
Gorai.006G060600	1	1	hydroxyproline-rich glycoprotein family protein		PTHR23139,PTHR23139:SF13					AT1G73840.1	ESP1
Gorai.006G061400	1	1	Complex I subunit NDUFS6	PF10249			1.6.5.3,1.6.99.3	K03966		AT1G49140.1
Gorai.006G062500	1	1
Gorai.006G064600	1	1	EXORDIUM like 3	PF04674						AT5G51550.1	EXL3
Gorai.006G064700	1	1	Ribosomal protein S10p/S20e family protein	PF00338	PTHR11700	KOG0900		K02969	GO:0003735,GO:0006412,GO:0005622,GO:0005840	AT3G47370.1
Gorai.006G065000	1	1	FK506 BINDING PROTEIN 53	PF00254	PTHR10516	KOG0552	5.2.1.8	K01802	GO:0006457	AT4G25340.1	ATFKBP53,FKBP53
Gorai.006G065800	1	1	subtilase 1.3	PF05922,PF00082,PF02225	PTHR10795,PTHR10795:SF17				GO:0004252,GO:0006508,GO:0042802,GO:0043086	AT5G51750.1	ATSBT1.3,SBT1.3
Gorai.006G066700	1	1	squamosa promoter binding protein-like 9	PF03110					GO:0003677,GO:0005634	AT2G42200.1	SPL9
Gorai.006G067000	1	1	Emsy N Terminus (ENT)/ plant Tudor-like domains-containing protein	PF03735		KOG4675				AT5G13020.1
Gorai.006G069600	1	1	Ribosomal protein S3Ae	PF01015	PTHR11830	KOG1628		K02984	GO:0003735,GO:0006412,GO:0005622,GO:0005840	AT4G34670.1
Gorai.006G069800	1	1	3-ketoacyl-CoA synthase 2	PF08392,PF08541					GO:0016746,GO:0009058,GO:0016747,GO:0006633,GO:0016020,GO:0008610,GO:0004315	AT1G04220.1	KCS2
Gorai.006G070600	1	1	HR-like lesion-inducing protein-related	PF05514						AT4G14420.1
Gorai.006G072600	1	1	Ribosomal protein L14	PF01929	PTHR11127	KOG3421		K02875	GO:0003735,GO:0006412,GO:0005622,GO:0005840	AT4G27090.1
Gorai.006G075100	1	1	dehydroquinate dehydratase, putative / shikimate dehydrogenase, putative	PF08501,PF01487,PF01488	PTHR21089	KOG0692	1.1.1.25,4.2.1.10	K13832	GO:0003855,GO:0016491,GO:0055114,GO:0004764,GO:0005737	AT3G06350.1	EMB3004,MEE32
Gorai.006G076400	1	1	eukaryotic translation initiation factor 2 gamma subunit	PF00009,PF09173,PF03144	PTHR23115:SF9,PTHR23115	KOG0466		K03242	GO:0003924,GO:0005525	AT1G04170.1	EIF2 GAMMA
Gorai.006G076500	1	1	eukaryotic translation initiation factor 2 gamma subunit	PF00009,PF09173,PF03144	PTHR23115:SF9,PTHR23115	KOG0466			GO:0003924,GO:0005525	AT1G04170.1	EIF2 GAMMA
Gorai.006G077200	1	1	pumilio 24	PF08144	PTHR13389	KOG2050			GO:0003723	AT3G16810.1	APUM24,PUM24
Gorai.006G077500	1	1	transducin family protein / WD-40 repeat family protein	PF04003,PF00400	PTHR22847,PTHR22847:SF201	KOG4547		K14546	GO:0005515	AT5G11240.1
Gorai.006G087900	1	1	receptor like protein 4	PF00560,PF11721	PTHR24420				GO:0005515	AT1G28340.1	AtRLP4,RLP4
Gorai.006G089700	1	1	Ribosomal L5P family protein	PF00673,PF00281	PTHR11994	KOG0397			GO:0003735,GO:0006412,GO:0005622,GO:0005840	AT5G45775.2
Gorai.006G091800	1	1	Mitochondrial transcription termination factor family protein	PF02536	PTHR13068,PTHR13068:SF3	KOG1267				AT4G19650.1
Gorai.006G092300	1	1	Aldolase-type TIM barrel family protein	PF01070	PTHR10578	KOG0538			GO:0003824,GO:0055114,GO:0016491,GO:0018580	AT4G18360.1
Gorai.006G092900	1	1	Ribosomal protein L18ae/LX family protein	PF01775	PTHR10052	KOG0829		K02882	GO:0003735,GO:0006412,GO:0005840	AT2G34480.1
Gorai.006G095300	1	1	phospholipid:diacylglycerol acyltransferase	PF02450	PTHR11440,PTHR11440:SF6				GO:0008374,GO:0006629,GO:0004607	AT5G13640.1	ATPDAT,PDAT,PDAT1
Gorai.006G096100	1	1	ubiquitin-specific protease 6	PF00240,PF00443	PTHR24006:SF39,PTHR24006	KOG1872	3.1.2.15	K11843	GO:0005515,GO:0004221,GO:0006511	AT1G51710.1	ATUBP6,UBP6
Gorai.006G100200	1	1	Cyclin A2;4	PF00134,PF02984	PTHR10177:SF49,PTHR10177	KOG0654		K06627	GO:0005634	AT1G80370.1	CYCA2;4
Gorai.006G100800	1	1	periodic tryptophan protein 2	PF00400,PF04003	PTHR19858	KOG0291		K14558	GO:0005515	AT1G15440.1	ATPWP2,PWP2
Gorai.006G106100	1	1	fatty acid desaturase 7	PF00487,PF11960	PTHR19353		1.14.19.-	K10257	GO:0006629,GO:0016717,GO:0055114,GO:0016491	AT3G11170.1	FAD7,FADD
Gorai.006G107100	1	1								AT1G80700.1
Gorai.006G107200	1	1	Domain of unknown function (DUF298)	PF03556	PTHR12281	KOG3077				AT1G15860.1
Gorai.006G109100	1	1	cellulose synthase-like A02	PF00535	PTHR10587,PTHR10587:SF34		2.4.1.32	K13680		AT5G22740.1	ATCSLA02,ATCSLA2,CSLA02,CSLA2
Gorai.006G109300	1	1	histone deacetylase 2C							AT5G03740.1	HD2C,HDT3
Gorai.006G110800	1	1	Protein kinase superfamily protein	PF00069	PTHR24353,PTHR24353:SF88	KOG0610			GO:0004672,GO:0005524,GO:0006468	AT3G44610.1
Gorai.006G112000	1	1	Ribosomal protein L1p/L10e family	PF00687	PTHR23105:SF4,PTHR23105	KOG1570			GO:0003723,GO:0003735,GO:0006412,GO:0015934	AT1G08360.1
Gorai.006G112100	1	1	Ribosomal protein S5/Elongation factor G/III/V family protein	PF03144,PF00679,PF03764,PF00009	PTHR23115:SF5,PTHR23115	KOG0468		K12852	GO:0003924,GO:0005525	AT1G06220.1	CLO,GFA1,MEE5
Gorai.006G113600	1	1	P-loop containing nucleoside triphosphate hydrolases superfamily protein	PF06068	PTHR11093	KOG1942		K04499	GO:0005524,GO:0009378,GO:0006281,GO:0006310,GO:0003678	AT5G22330.1	ATTIP49A,RIN1
Gorai.006G114200	1	1	Protein of unknown function (DUF1279)	PF06916	PTHR21377	KOG4526				AT2G27290.1
Gorai.006G114800	1	1	NIMA (never in mitosis, gene A)-related 6	PF00069	PTHR24362,PTHR24362:SF158	KOG0589			GO:0004672,GO:0005524,GO:0006468	AT3G44200.1	ATNEK6,IBO1,NEK6
Gorai.006G117500	1	1	strictosidine synthase-like 3	PF03088	PTHR10426:SF5,PTHR10426	KOG1520			GO:0016844,GO:0009058	AT1G08470.1	SSL3
Gorai.006G118600	1	1	Nucleotidylyl transferase superfamily protein	PF00579	PTHR10055,PTHR10055:SF1	KOG2145	6.1.1.2	K01867	GO:0000166,GO:0004812,GO:0005524,GO:0006418,GO:0005737,GO:0006412,GO:0006436,GO:0004830	AT3G04600.1
Gorai.006G118800	1	1	NADH:ubiquinone oxidoreductase, 17.2kDa subunit	PF05071	PTHR12910	KOG3382	1.6.5.3,1.6.99.3	K11352	GO:0008137,GO:0009055,GO:0016020	AT3G03100.1
Gorai.006G119300	1	1	vacuolar proton ATPase A1	PF01496	PTHR11629,PTHR11629:SF11	KOG2189	3.6.3.14	K02154	GO:0015078,GO:0015991,GO:0033177	AT2G28520.1	VHA-A1
Gorai.006G121400	1	1	20S proteasome alpha subunit G1	PF00227,PF10584	PTHR11599,PTHR11599:SF10	KOG0184	3.4.25.1	K02727	GO:0004298,GO:0051603,GO:0005839,GO:0004175,GO:0006511,GO:0019773	AT2G27020.1	PAG1
Gorai.006G121800	1	none	Major facilitator superfamily protein		PTHR11654:SF37,PTHR11654					AT3G53960.1
Gorai.006G122100	1	1	chaperonin 10	PF00166	PTHR10772	KOG1641		K04078	GO:0006457,GO:0005737	AT1G14980.1	CPN10
Gorai.006G122200	1	1								AT5G12240.2
Gorai.006G122300	1	1								AT2G44820.1
Gorai.006G122400	1	1	ARM repeat superfamily protein		PTHR23346,PTHR23346:SF1	KOG0915		K11886		AT2G26780.1
Gorai.006G124500	1	1	CRT (chloroquine-resistance transporter)-like transporter 3							AT5G12170.2	CLT3
Gorai.006G125800	1	1	titan9							AT3G20070.1	TTN9
Gorai.006G126500	1	1	Pentatricopeptide repeat (PPR-like) superfamily protein	PF01535	PTHR24015					AT5G13770.1
Gorai.006G126900	1	1	ABC-2 type transporter family protein	PF01061,PF00005	PTHR19241,PTHR19241:SF20	KOG0061			GO:0005524,GO:0016887,GO:0016020	AT1G51460.1
Gorai.006G127100	1	1	NAD kinase 1	PF01513	PTHR20275	KOG2178	2.7.1.23	K00858	GO:0003951,GO:0008152	AT3G21070.2	ATNADK-1,NADK1
Gorai.006G127400	1	1	Protein of unknown function (DUF3411)	PF11891						AT5G12470.1
Gorai.006G127900	1	1	myosin-related							AT1G51405.1
Gorai.006G128000	1	1	Ribosomal protein S5 family protein	PF03719,PF00333	PTHR13718,PTHR13718:SF4	KOG0877		K02981	GO:0003723,GO:0003735,GO:0006412,GO:0005622,GO:0005840	AT1G58380.1	XW6
Gorai.006G129000	1	1	dicarboxylate transporter 1	PF00939	PTHR10283:SF13,PTHR10283				GO:0005215,GO:0006814,GO:0055085,GO:0016020	AT5G12860.1	DiT1
Gorai.006G129300	1	1	arogenate dehydrogenase	PF02153					GO:0004665,GO:0008977,GO:0006571,GO:0055114,GO:0016491	AT5G34930.1
Gorai.006G130600	1	1	PDI-like 5-2	PF00085	PTHR18929,PTHR18929:SF32	KOG0907			GO:0045454	AT1G35620.1	ATPDI8,ATPDIL5-2,PDI8,PDIL5-2
Gorai.006G131800	1	1	leucine-rich repeat transmembrane protein kinase family protein	PF07714,PF00560,PF08263	PTHR24420:SF508,PTHR24420	KOG1187			GO:0004672,GO:0005524,GO:0006468,GO:0005515	AT1G34420.1
Gorai.006G132600	1	1	Thioredoxin superfamily protein							AT2G31840.1
Gorai.006G134100	1	1	homologue of NAP57	PF01509,PF08068,PF01472	PTHR23127	KOG2529	5.4.99.-	K11131	GO:0003723,GO:0006396	AT3G57150.1	AtCBF5,AtNAP57,CBF5,NAP57
Gorai.006G135800	1	1								AT3G57320.1
Gorai.006G136300	1	1	DTW domain-containing protein	PF03942	PTHR21392	KOG4382				AT2G41750.1
Gorai.006G137000	1	1	Protein of unknown function, DUF642	PF04862						AT2G41810.1
Gorai.006G138800	1	1
Gorai.006G140000	1	1	Cornichon family protein	PF03311	PTHR12290,PTHR12290:SF5	KOG2729			GO:0035556,GO:0016020	AT3G12180.1
Gorai.006G141200	1	1	Calcium-dependent lipid-binding (CaLB domain) plant phosphoribosyltransferase family protein	PF00168,PF08372	PTHR10024:SF97,PTHR10024				GO:0005515	AT3G57880.1
Gorai.006G143100	1	1	lumazine-binding family protein	PF00677	PTHR21098	KOG3310	2.5.1.9	K00793	GO:0004746,GO:0009231	AT2G20690.1
Gorai.006G143800	1	1	Protein of unknown function DUF106, transmembrane	PF01956	PTHR20917	KOG3312			GO:0016020	AT5G06660.1
Gorai.006G145100	1	1	RNA binding;RNA binding	PF05843,PF00575	PTHR23270	KOG1070			GO:0003723,GO:0006397,GO:0005634	AT3G11964.1
Gorai.006G146000	1	1	ribosomal protein 5B	PF00177	PTHR11205,PTHR11205:SF1	KOG3291			GO:0006412,GO:0005840,GO:0005622,GO:0003735,GO:0015935	AT2G37270.1	ATRPS5B,RPS5B
Gorai.006G146400	1	1								AT5G06590.1
Gorai.006G146900	1	1	Protein of unknown function, DUF593	PF04576						AT5G06560.1
Gorai.006G147800	1	1	Ribosomal protein L22p/L17e family protein	PF00237	PTHR13501	KOG1711			GO:0003735,GO:0006412,GO:0005622,GO:0005840,GO:0015934	AT4G28360.1
Gorai.006G150500	1	1		PF09758	PTHR21481					AT3G28430.1
Gorai.006G150600	1	1	Eukaryotic aspartyl protease family protein	PF00026	PTHR13683,PTHR13683:SF98	KOG1339			GO:0004190,GO:0006508	AT3G52500.1
Gorai.006G152700	1	1	RNA binding (RRM/RBD/RNP motifs) family protein	PF00076	PTHR24012,PTHR24012:SF31	KOG0121			GO:0003676	AT5G06210.1
Gorai.006G153300	1	1	ubiquitin extension protein 1	PF00240,PF01020	PTHR10666	KOG0003		K02927	GO:0005515,GO:0003735,GO:0006412,GO:0005840	AT3G52590.1	EMB2167,ERD16,HAP4,UBQ1
Gorai.006G154900	1	1	Glutaredoxin family protein	PF00462	PTHR10168:SF44,PTHR10168	KOG1752			GO:0009055,GO:0015035,GO:0045454	AT5G03870.1
Gorai.006G156300	1	1	uridine-ribohydrolase 1	PF01156	PTHR12304	KOG2938				AT2G36310.1	URH1
Gorai.006G156700	1	1	60S acidic ribosomal protein family	PF00428	PTHR21141	KOG3449		K02943	GO:0003735,GO:0006414,GO:0005622,GO:0005840	AT3G44590.1
Gorai.006G158900	1	1	Pyruvate kinase family protein	PF00224,PF02887	PTHR11817	KOG2323	2.7.1.40	K00873	GO:0000287,GO:0004743,GO:0030955,GO:0006096	AT3G52990.1
Gorai.006G159400	1	1	ribosomal protein L24	PF01246	PTHR10792	KOG1722		K02896	GO:0006412,GO:0005840,GO:0003735	AT2G36620.1	RPL24A
Gorai.006G162400	1	1	xyloglucan endotransglucosylase/hydrolase 32	PF00722,PF06955			2.4.1.207	K08235	GO:0004553,GO:0005975,GO:0016762,GO:0006073,GO:0005618,GO:0048046	AT2G36870.1	XTH32
Gorai.006G162900	1	1	AMP-dependent synthetase and ligase family protein	PF00501	PTHR24096,PTHR24096:SF43	KOG1176			GO:0003824,GO:0008152	AT4G05160.1
Gorai.006G164100	1	1	SAUR-like auxin-responsive protein family	PF02519				K14488		AT3G09870.1
Gorai.006G164600	1	1		PF10270	PTHR21181,PTHR21181:SF6					AT5G03345.1
Gorai.006G164700	1	1	phosphoglycerate kinase 1	PF02390,PF00162	PTHR23417:SF1,PTHR23417	KOG1367			GO:0004618,GO:0006096,GO:0008176,GO:0006400	AT3G12780.1	PGK1
Gorai.006G165400	1	1	Cysteine proteinases superfamily protein	PF02338	PTHR12419	KOG2605				AT5G03330.1
Gorai.006G165800	1	1	adenosine kinase 2	PF00294	PTHR10584:SF24,PTHR10584	KOG2854	2.7.1.20	K00856	GO:0006166,GO:0004001	AT5G03300.1	ADK2
Gorai.006G165900	1	1	isocitrate dehydrogenase V	PF00180	PTHR11835,PTHR11835:SF5	KOG0785	1.1.1.41	K00030	GO:0016616,GO:0055114,GO:0051287,GO:0000287	AT5G03290.1	IDH-V
Gorai.006G166300	1	1	chloroplast RNA-binding protein 29	PF00076	PTHR24012,PTHR24012:SF56	KOG0131			GO:0003676	AT3G53460.1	CP29
Gorai.006G170500	1	1	Uncharacterised protein family (UPF0497)	PF04535						AT3G53850.1
Gorai.006G171800	1	1	FTSH protease 10	PF01434,PF00004	PTHR23076:SF11,PTHR23076	KOG0731			GO:0005524,GO:0004222,GO:0006508	AT1G07510.1	ftsh10
Gorai.006G172000	1	1	TRF-like 1		PTHR14014					AT3G46590.1	ATTRP2,TRFL1,TRP2
Gorai.006G172400	1	1	expansin A4	PF01357,PF03330						AT2G39700.1	ATEXP4,ATEXPA4,ATHEXP ALPHA 1.6,EXPA4
Gorai.006G174000	1	1	heat shock cognate protein 70-1	PF00012	PTHR19375	KOG0100		K03283	GO:0000902,GO:0005524	AT5G02500.1	AT-HSC70-1,HSC70,HSC70-1,HSP70-1
Gorai.006G174100	1	1
Gorai.006G174500	1	1	ARF-GAP domain 7	PF01412	PTHR23180,PTHR23180:SF80	KOG0704			GO:0008060,GO:0008270,GO:0032312	AT2G37550.1	AGD7,ASP1
Gorai.006G175100	1	1	arginine biosynthesis protein ArgJ family	PF01960	PTHR23100	KOG2786	2.3.1.1,2.3.1.35	K00620	GO:0004358,GO:0006526	AT2G37500.1
Gorai.006G177300	1	1								AT2G37300.2
Gorai.006G177400	1	1	Protein phosphatase 2C family protein	PF00481	PTHR13832,PTHR13832:SF97	KOG0700			GO:0003824	AT3G12620.1
Gorai.006G178000	1	1	Homeodomain-like superfamily protein	PF00249	PTHR12802:SF30,PTHR12802	KOG0724			GO:0003677	AT3G09600.1
Gorai.006G178800	1	1								AT3G54000.1
Gorai.006G178900	1	1	FKBP-type peptidyl-prolyl cis-trans isomerase family protein	PF00254,PF00515	PTHR10516:SF70,PTHR10516	KOG0543			GO:0006457,GO:0005515	AT3G54010.1	DEI1,PAS1
Gorai.006G179500	1	1	Protein kinase protein with tetratricopeptide repeat domain	PF07714	PTHR24420:SF457,PTHR24420	KOG1187			GO:0004672,GO:0005524,GO:0006468	AT3G54030.1
Gorai.006G179800	1	1	Concanavalin A-like lectin family protein	PF00139	PTHR11795:SF43,PTHR11795				GO:0005488	AT5G01090.1
Gorai.006G180000	1	1	fructokinase-like 1	PF00294	PTHR10584,PTHR10584:SF34	KOG2855				AT3G54090.1	FLN1
Gorai.006G182400	1	1	S-adenosyl-L-methionine-dependent methyltransferases superfamily protein	PF10294	PTHR10108,PTHR10108:SF244					AT5G01470.3
Gorai.006G183700	1	1	metallopeptidase M24 family protein	PF00557	PTHR10804:SF11,PTHR10804	KOG2776			GO:0009987	AT3G51800.3	ATEBP1,ATG2,EBP1
Gorai.006G185900	1	1	Protein phosphatase 2C family protein	PF00481	PTHR13832,PTHR13832:SF94	KOG0698			GO:0003824	AT5G01700.2
Gorai.006G186800	1	1	S-adenosyl-L-methionine-dependent methyltransferases superfamily protein	PF05724	PTHR10108,PTHR10108:SF241				GO:0008119,GO:0008152,GO:0005737,GO:0008168	AT2G43940.1	ATHOL3,HOL3
Gorai.006G187200	1	1	transducin family protein / WD-40 repeat family protein	PF00400	PTHR19857,PTHR19857:SF16	KOG0296			GO:0005515	AT1G71840.1
Gorai.006G188200	1	1	ubiquitin-conjugating enzyme 5	PF00179	PTHR24067,PTHR24067:SF19	KOG0416			GO:0016881	AT1G63800.1	UBC5
Gorai.006G190800	1	1	annexin 5	PF00191	PTHR10502:SF10,PTHR10502	KOG0819			GO:0005509,GO:0005544	AT1G68090.1	ANN5,ANNAT5
Gorai.006G191200	1	1	pyrimidine 1	PF01180	PTHR11938:SF15,PTHR11938	KOG1799	1.3.1.2	K00207	GO:0004152,GO:0006222,GO:0055114	AT3G17810.1	PYD1
Gorai.006G192600	1	1	receptor for activated C kinase 1B	PF00400	PTHR19868	KOG0279			GO:0005515	AT1G48630.1	RACK1B_AT
Gorai.006G193100	1	1	Translation elongation factor EF1A/initiation factor IF2gamma family protein	PF00009,PF03144,PF03143	PTHR23115:SF36,PTHR23115	KOG0459		K03267	GO:0003924,GO:0005525	AT1G18070.1
Gorai.006G193300	1	1	cyclin-dependent kinase D1;3	PF00069	PTHR24056,PTHR24056:SF93	KOG0659	2.7.11.22	K02202	GO:0004672,GO:0005524,GO:0006468	AT1G18040.1	AT;CDCKD;3,CAK2AT,CDKD1;3
Gorai.006G193400	1	1	Mitochondrial substrate carrier family protein	PF00153	PTHR24089,PTHR24089:SF95	KOG0750				AT5G01340.1
Gorai.006G194400	1	1	Ribosomal protein S7e family protein	PF01251	PTHR11278	KOG3320		K02993	GO:0003735,GO:0006412,GO:0005622,GO:0005840	AT1G48830.1
Gorai.006G195500	1	1	Peptidyl-tRNA hydrolase family protein	PF01195	PTHR17224	KOG2255	3.1.1.29	K01056	GO:0004045,GO:0006412	AT1G18440.1
Gorai.006G195800	1	1	Ribosomal protein S10p/S20e family protein	PF00338	PTHR11700	KOG0900		K02969	GO:0003735,GO:0006412,GO:0005622,GO:0005840	AT3G47370.1
Gorai.006G195900	1	1	ribosomal protein S13A	PF00312,PF08069	PTHR11885	KOG0400		K02953	GO:0003735,GO:0006412,GO:0005622,GO:0005840	AT4G00100.1	ATRPS13A,PFL2,RPS13,RPS13A
Gorai.006G196200	1	1	protein binding;zinc ion binding	PF04968	PTHR12621:SF1,PTHR12621					AT5G51700.1	ATRAR1,PBS2,RAR1,RPR2
Gorai.006G199400	1	1	beta-hydroxylase 1	PF04116			1.14.13.-	K02294	GO:0005506,GO:0016491,GO:0006633,GO:0055114	AT4G25700.1	B1,BCH1,BETA-OHASE 1,chy1
Gorai.006G201200	1	1	HSP20-like chaperones superfamily protein	PF04969	PTHR12356	KOG2265				AT5G53400.1	BOB1
Gorai.006G201800	1	1		PF09341						AT5G53045.1
Gorai.006G202100	1	1	ARM repeat superfamily protein	PF03810,PF02985	PTHR10527:SF1,PTHR10527	KOG1241		K14293	GO:0005515,GO:0008565,GO:0006886	AT5G53480.1
Gorai.006G202900	1	1	Major facilitator superfamily protein	PF05631	PTHR24003,PTHR24003:SF315	KOG4332			GO:0055085,GO:0016021	AT4G27720.1
Gorai.006G203500	1	1	60S acidic ribosomal protein family	PF00428	PTHR21141	KOG1762		K02942	GO:0003735,GO:0006414,GO:0005622,GO:0005840	AT5G24510.1
Gorai.006G204900	1	1								AT5G42110.1
Gorai.006G207500	1	1								AT4G10970.1
Gorai.006G207800	1	1	Integrase-type DNA-binding superfamily protein	PF00847					GO:0003700,GO:0006355	AT1G64380.1
Gorai.006G209300	1	1	Mitochondrial substrate carrier family protein	PF00153	PTHR24089:SF12,PTHR24089	KOG0768				AT4G11440.1
Gorai.006G209700	1	1		PF08772	PTHR12814			K11883		AT5G41190.1
Gorai.006G210300	1	1	phosphoenolpyruvate carboxylase-related kinase 1	PF00069	PTHR24349	KOG0032			GO:0004672,GO:0005524,GO:0006468	AT1G12580.1	PEPKR1
Gorai.006G211400	1	1	armadillo repeat kinesin 3	PF00225,PF00514	PTHR24115:SF69,PTHR24115	KOG0240			GO:0003777,GO:0005524,GO:0007018,GO:0005515	AT1G12430.1	ARK3,PAK
Gorai.006G211600	1	1	ACT domain repeat 8	PF01842	PTHR13734:SF23,PTHR13734				GO:0016597,GO:0008152	AT1G12420.1	ACR8
Gorai.006G211800	1	1	sterol 4-alpha methyl oxidase 1-3	PF04116,PF01529	PTHR11863,PTHR11863:SF21	KOG0873	1.14.13.72	K14423	GO:0008270,GO:0005506,GO:0016491,GO:0006633,GO:0055114	AT4G22753.2	ATSMO1,ATSMO1-3,SMO1,SMO1-3
Gorai.006G212300	1	1	stress-inducible protein, putative	PF00515	PTHR22904,PTHR22904:SF14	KOG0548		K09553	GO:0005515	AT4G12400.2
Gorai.006G212500	1	1	Cupredoxin superfamily protein	PF00394,PF07731,PF07732	PTHR11709:SF18,PTHR11709	KOG1263			GO:0016491,GO:0055114,GO:0005507	AT4G12420.1	SKU5
Gorai.006G213300	1	1	P-loop containing nucleoside triphosphate hydrolases superfamily protein	PF04438,PF00098	PTHR24031,PTHR24031:SF58				GO:0003676,GO:0008270	AT3G02065.2
Gorai.006G213900	1	1	acyl-CoA oxidase 1	PF01756,PF02770	PTHR10909,PTHR10909:SF11	KOG0136	1.3.3.6	K00232	GO:0003997,GO:0006635,GO:0055114,GO:0005777,GO:0003995	AT4G16760.1	ACX1,ATACX1
Gorai.006G214900	1	1	Zinc-binding ribosomal protein family protein	PF01780	PTHR11517	KOG0402		K02921	GO:0003735,GO:0006412,GO:0005622,GO:0005840	AT3G10950.1
Gorai.006G218000	1	1	P-loop containing nucleoside triphosphate hydrolases superfamily protein	PF00625	PTHR23117:SF1,PTHR23117	KOG0707	2.7.4.8	K00942	GO:0005515	AT3G06200.1
Gorai.006G219100	1	1	heat shock protein 60	PF00118	PTHR11353:SF9,PTHR11353	KOG0356		K04077	GO:0005524,GO:0044267	AT3G23990.1	HSP60,HSP60-3B
Gorai.006G219200	1	1	heat shock protein 60	PF00118	PTHR11353:SF9,PTHR11353	KOG0356		K04077	GO:0005524,GO:0044267	AT3G23990.1	HSP60,HSP60-3B
Gorai.006G219300	1	1	Serinc-domain containing serine and sphingolipid biosynthesis protein	PF03348	PTHR10383,PTHR10383:SF2	KOG2592			GO:0016020	AT2G33205.1
Gorai.006G220400	1	1	Protein kinase superfamily protein	PF01636,PF03109	PTHR10566,PTHR10566:SF10	KOG1235		K08869		AT3G24190.1
Gorai.006G221700	1	1	Protein of unknown function (DUF962)	PF06127		KOG3292				AT1G18720.1
Gorai.006G222200	1	1	Ribosomal protein L13 family protein	PF00572	PTHR11545	KOG3204			GO:0003735,GO:0006412,GO:0005840	AT5G48760.1
Gorai.006G222700	1	1	purple acid phosphatase 15	PF00149	PTHR22953	KOG1378			GO:0016787	AT3G07130.1	ATPAP15,PAP15
Gorai.006G223200	1	1	Protein of unknown function (DUF3741)	PF12552	PTHR21726,PTHR21726:SF4					AT4G00440.2
Gorai.006G223800	1	1	serine hydroxymethyltransferase 4	PF00464	PTHR11680	KOG2467	2.1.2.1	K00600	GO:0004372,GO:0006544,GO:0006563	AT4G13930.1	SHM4
Gorai.006G225000	1	1	Pentatricopeptide repeat (PPR) superfamily protein							AT4G14200.1
Gorai.006G226100	1	1	MAC/Perforin domain-containing protein	PF01823	PTHR19324,PTHR19324:SF4					AT1G14780.1
Gorai.006G227100	1	1	translation initiation factor 3 subunit H1	PF01398	PTHR10410,PTHR10410:SF3	KOG1560		K03247	GO:0005515	AT1G10840.1	TIF3H1
Gorai.006G229300	1	1	B-box zinc finger family protein	PF00643					GO:0008270,GO:0005622	AT1G06040.1	STO
Gorai.006G229600	1	1	glyoxalase 2-4	PF00753	PTHR11935,PTHR11935:SF7	KOG0813			GO:0016787	AT1G06130.2	GLX2-4
Gorai.006G229800	1	1	Ribosomal L38e protein family	PF01781	PTHR10965	KOG3499			GO:0003735,GO:0006412,GO:0005622,GO:0005840	AT3G59540.1
Gorai.006G231800	1	1	Ribosomal protein S4 (RPS4A) family protein	PF08071,PF01479,PF00467,PF00900	PTHR11581	KOG0378		K02987	GO:0003723,GO:0006412,GO:0005840,GO:0005622,GO:0003735	AT5G07090.1
Gorai.006G233700	1	1	D-mannose binding lectin protein with Apple-like carbohydrate-binding domain	PF01453	PTHR11795:SF81,PTHR11795				GO:0005529	AT3G51710.1
Gorai.006G234900	1	1	MAC/Perforin domain-containing protein	PF01823	PTHR19324,PTHR19324:SF4					AT1G29690.1	CAD1
Gorai.006G237100	1	1	ARM repeat protein interacting with ABF2	PF00514,PF00651	PTHR23315				GO:0005515	AT5G19330.1	ARIA
Gorai.006G237300	1	1								AT3G05980.1
Gorai.006G239100	1	1	imidazoleglycerol-phosphate dehydratase	PF00475	PTHR23133:SF2,PTHR23133	KOG3143	4.2.1.19	K01693	GO:0004424,GO:0000105	AT3G22425.2	HISN5A,IGPD
Gorai.006G239500	1	1	O-acetylserine (thiol) lyase (OAS-TL) isoform A1	PF00291	PTHR10314,PTHR10314:SF8	KOG1252	2.5.1.47	K01738	GO:0003824,GO:0030170,GO:0008152	AT4G14880.1	ATCYS-3A,CYTACS1,OASA1,OLD3
Gorai.006G240900	1	1	20S proteasome beta subunit D1	PF00227	PTHR11599,PTHR11599:SF6	KOG0177			GO:0004298,GO:0051603,GO:0005839	AT3G22630.1	PBD1,PRCGB
Gorai.006G241700	1	1	Ribosomal protein S3Ae	PF01015	PTHR11830	KOG1628		K02984	GO:0003735,GO:0006412,GO:0005622,GO:0005840	AT4G34670.1
Gorai.006G241800	1	1	IQ-domain 19	PF00612	PTHR13140,PTHR13140:SF72				GO:0005515	AT4G14750.1	IQD19
Gorai.006G241900	1	1								AT4G14746.1
Gorai.006G243400	1	1	Pseudouridine synthase/archaeosine transglycosylase-like family protein	PF01747	PTHR24799:SF2,PTHR24799	KOG0636	2.7.1.25,2.7.7.4	K13811	GO:0004781,GO:0000103	AT4G14680.1	APS3
Gorai.006G243600	1	1	calmodulin-like 11	PF00036	PTHR23050:SF20,PTHR23050	KOG0027				AT3G22930.1	CML11
Gorai.006G243700	1	1								AT3G55760.1
Gorai.006G245500	1	1	acylaminoacyl-peptidase-related	PF00326	PTHR11731,PTHR11731:SF7	KOG2100	3.4.19.1	K01303	GO:0008236,GO:0006508,GO:0016787,GO:0008152	AT4G14570.1
Gorai.006G245800	1	1	Glycosyl hydrolase family 47 protein	PF01532	PTHR11742,PTHR11742:SF19	KOG2429		K10085	GO:0004571,GO:0005509,GO:0016020	AT5G43710.1
Gorai.006G245900	1	1	AUX/IAA transcriptional regulator family protein	PF02309				K14484	GO:0006355,GO:0005634	AT5G43700.1	ATAUX2-11,IAA4
Gorai.006G246500	1	1	cytosolic ribosomal protein S15	PF00203	PTHR11880	KOG0898		K02958	GO:0003735,GO:0006412,GO:0005840	AT1G04270.1	RPS15
Gorai.006G246700	1	1	P-loop containing nucleoside triphosphate hydrolases superfamily protein	PF03029	PTHR21231,PTHR21231:SF1	KOG1532		K06883	GO:0003924,GO:0005525,GO:0000166	AT4G21800.1	QQT2
Gorai.006G246900	1	1
Gorai.006G251800	1	1	Cyclopropane-fatty-acyl-phospholipid synthase	PF02353,PF01593	PTHR10108,PTHR10108:SF296		2.1.1.79	K00574	GO:0016491,GO:0055114,GO:0008610,GO:0008168,GO:0008152	AT3G23510.1
Gorai.006G252300	1	1	Peroxisomal membrane 22 kDa (Mpv17/PMP22) family protein	PF04117	PTHR11266	KOG1944			GO:0016021	AT4G14305.1
Gorai.006G252700	1	1	Ribosomal protein L14	PF01929	PTHR11127	KOG3421		K02875	GO:0003735,GO:0006412,GO:0005622,GO:0005840	AT4G27090.1
Gorai.006G253600	1	1	actin depolymerizing factor 6	PF00241	PTHR11913	KOG1735			GO:0003779,GO:0005622	AT2G31200.1	ADF6,ATADF6
Gorai.006G254300	1	1	Surfeit locus protein 6	PF04935	PTHR14369	KOG2885				AT5G05210.1
Gorai.006G255000	1	1	GLU-ADT subunit B	PF02934,PF02637	PTHR11659	KOG2438	6.3.5.6,6.3.5.7	K02434	GO:0016884,GO:0016874,GO:0006412	AT1G48520.1	GATB
Gorai.006G256500	1	1	2-oxoglutarate (2OG) and Fe(II)-dependent oxygenase superfamily protein	PF01549,PF03171	PTHR10869	KOG1591	1.14.11.2	K00472	GO:0016491,GO:0016706,GO:0055114	AT5G18900.1
Gorai.006G258400	1	1	PAS domain-containing protein tyrosine kinase family protein	PF07714,PF00989	PTHR23257,PTHR23257:SF80	KOG0192			GO:0004672,GO:0005524,GO:0006468,GO:0006355	AT3G06620.1
Gorai.006G260000	1	1	Translation initiation factor eIF3 subunit	PF08597	PTHR21681	KOG4813				AT5G37475.1
Gorai.006G264900	1	1	chromatin-remodeling protein 11	PF00271,PF09111,PF00176,PF09110	PTHR10799,PTHR10799:SF73	KOG0385	3.6.4.-	K11654	GO:0003677,GO:0005524,GO:0003676,GO:0004386,GO:0016787,GO:0031491,GO:0043044,GO:0016585,GO:0016818,GO:0006338,GO:0005634	AT3G06400.2	CHR11
Gorai.006G267200	1	1	actin binding	PF10409,PF02181	PTHR23213,PTHR23213:SF18	KOG1922			GO:0005515	AT5G07740.1
Gorai.006G267300	1	1	Protein kinase superfamily protein	PF00069	PTHR24056,PTHR24056:SF77	KOG0600			GO:0004672,GO:0005524,GO:0006468	AT1G18670.1	IBS1
Gorai.006G268300	1	1								AT1G74160.1
Gorai.006G269500	1	1	with no lysine (K) kinase 3	PF00069	PTHR13902:SF36,PTHR13902	KOG0584			GO:0004672,GO:0005524,GO:0006468	AT3G48260.1	WNK3
Gorai.006G269800	1	1	alpha/beta-Hydrolases superfamily protein	PF00326	PTHR12277:SF8,PTHR12277	KOG1552			GO:0008236,GO:0006508,GO:0016787	AT4G24760.1
Gorai.006G270700	1	1	nucleoside diphosphate kinase 2	PF00334	PTHR11349	KOG0888	2.7.4.6	K00940	GO:0004550,GO:0005524,GO:0006165,GO:0006183,GO:0006228,GO:0006241	AT5G63310.1	ATNDPK2,NDPK IA,NDPK IA IA,NDPK1A,NDPK2
Gorai.006G272400	1	1	Ribosomal protein L7Ae/L30e/S12e/Gadd45 family protein	PF01248	PTHR23105:SF1,PTHR23105	KOG3166				AT3G62870.1
Gorai.006G273500	1	1	calnexin 1	PF00262	PTHR11073	KOG0675			GO:0005509	AT5G61790.1	ATCNX1,CNX1
Gorai.007G001400	1	1	receptor-like serine/threonine kinase 2	PF00069,PF01657	PTHR24420,PTHR24420:SF433	KOG1187			GO:0004672,GO:0005524,GO:0006468	AT1G19090.1	CRK1,RKF2
Gorai.007G002000	1	1	cyclic nucleotide-binding transporter 1		PTHR10217:SF7,PTHR10217	KOG0498		K05391		AT3G17700.1	ATCNGC20,CNBT1,CNGC20
Gorai.007G004200	1	1	Protein of unknown function (DUF1295)	PF06966	PTHR10556,PTHR10556:SF24	KOG4650				AT1G18180.1
Gorai.007G004400	1	1	MAP kinase 9	PF00069	PTHR24055,PTHR24055:SF69	KOG0660			GO:0004672,GO:0005524,GO:0006468,GO:0016773,GO:0009103,GO:0016020	AT3G18040.1	MPK9
Gorai.007G005200	1	1	nuclear RNA polymerase C2	PF04567,PF04566,PF04561,PF04563,PF04560,PF00562	PTHR20856:SF8,PTHR20856	KOG0215			GO:0003677,GO:0003899,GO:0006351,GO:0032549	AT5G45140.1	NRPC2
Gorai.007G005300	1	1	Protein of unknown function (DUF789)	PF05623						AT1G15030.1
Gorai.007G005600	1	1	Ribosomal protein S7e family protein	PF01251	PTHR11278	KOG3320		K02993	GO:0003735,GO:0006412,GO:0005622,GO:0005840	AT1G48830.1
Gorai.007G006700	1	1
Gorai.007G008100	1	1	Zincin-like metalloproteases family protein	PF01432	PTHR11804,PTHR11804:SF5	KOG2090	3.4.24.59	K01410	GO:0004222,GO:0006508	AT5G51540.1
Gorai.007G008300	1	1	Ribosomal protein S10p/S20e family protein	PF00338	PTHR11700	KOG0900		K02969	GO:0003735,GO:0006412,GO:0005622,GO:0005840	AT3G47370.1
Gorai.007G009400	1	1	DEAD box RNA helicase (PRH75)	PF00271,PF08152,PF00270	PTHR24031,PTHR24031:SF22	KOG0331			GO:0003676,GO:0005524,GO:0008026,GO:0004386,GO:0003723,GO:0005634	AT5G62190.1	PRH75
Gorai.007G010200	1	1	Integrase-type DNA-binding superfamily protein	PF00847					GO:0003700,GO:0006355	AT5G52020.1
Gorai.007G011200	1	1	tripeptidyl peptidase ii	PF12580,PF00082	PTHR10795,PTHR10795:SF2	KOG1114	3.4.14.10	K01280	GO:0004252,GO:0006508	AT4G20850.1	TPP2
Gorai.007G011600	1	1	Divalent ion symporter	PF03600	PTHR10283:SF40,PTHR10283	KOG2639			GO:0015105,GO:0016021,GO:0015137,GO:0015746,GO:0055085	AT1G02260.1
Gorai.007G011700	1	1	Divalent ion symporter	PF03600	PTHR10283:SF40,PTHR10283	KOG2639			GO:0015105,GO:0016021,GO:0015137,GO:0015746,GO:0055085	AT1G02260.1
Gorai.007G012000	1	1	HXXXD-type acyl-transferase family protein	PF02458					GO:0016747	AT5G23940.1	DCR,EMB3009,PEL3
Gorai.007G012200	1	1	fibrillarin 2	PF01269	PTHR10335	KOG1596	2.1.1.-	K14563	GO:0003723,GO:0008168,GO:0006364,GO:0008033,GO:0016429,GO:0030488	AT4G25630.1	ATFIB2,FIB2
Gorai.007G012400	1	1	Protein of unknown function (DUF819)	PF05684						AT5G24000.1
Gorai.007G013500	1	1	SNARE-like superfamily protein	PF04099	PTHR23249,PTHR23249:SF9	KOG3368			GO:0006888,GO:0005801,GO:0005622	AT1G51160.1
Gorai.007G015300	1	1	Plant invertase/pectin methylesterase inhibitor superfamily	PF01095,PF04043	PTHR22931,PTHR22931:SF5				GO:0030599,GO:0042545,GO:0005618,GO:0004857	AT3G49220.1
Gorai.007G016500	1	1	Major facilitator superfamily protein	PF05631	PTHR24003,PTHR24003:SF315	KOG4332			GO:0055085,GO:0016021	AT4G27720.1
Gorai.007G016700	1	1	ubiquitin extension protein 1	PF00240,PF01020	PTHR10666	KOG0003		K02927	GO:0005515,GO:0003735,GO:0006412,GO:0005840	AT3G52590.1	EMB2167,ERD16,HAP4,UBQ1
Gorai.007G017000	1	1	SER/ARG-rich protein 34A	PF00076	PTHR10548	KOG0105			GO:0003676	AT3G49430.1	SRp34a
Gorai.007G018000	1	1	TMPIT-like protein	PF07851	PTHR21433	KOG4758			GO:0016021	AT4G10430.1
Gorai.007G018400	1	1	Ribosomal protein L6 family	PF00347	PTHR11655:SF2,PTHR11655	KOG3255		K02940	GO:0003735,GO:0019843,GO:0006412,GO:0005840	AT4G10450.1
Gorai.007G019700	1	1	alpha/beta-Hydrolases superfamily protein	PF00561	PTHR10992,PTHR10992:SF217	KOG1454			GO:0016787	AT1G64670.1	BDG1
Gorai.007G020300	1	1	Heat shock protein 70 (Hsp 70) family protein	PF00012	PTHR19375	KOG0100		K09490	GO:0000902,GO:0005524	AT5G42020.1	BIP,BIP2
Gorai.007G020600	1	1	Heat shock protein 70 (Hsp 70) family protein	PF00012	PTHR19375	KOG0100		K09490	GO:0000902,GO:0005524	AT5G42020.1	BIP,BIP2
Gorai.007G021100	1	1	Bifunctional inhibitor/lipid-transfer protein/seed storage 2S albumin superfamily protein							AT1G62790.1
Gorai.007G022800	1	1	Transcription initiation factor TFIIE, beta subunit		PTHR12716	KOG3095		K03137		AT4G20330.1
Gorai.007G025300	1	1	arabinogalactan protein 16	PF06376						AT2G46330.1	AGP16,ATAGP16
Gorai.007G026000	1	1	Pectin lyase-like superfamily protein	PF00295					GO:0004650,GO:0005975	AT4G23820.1
Gorai.007G028600	1	1	Ribosomal protein L23/L15e family protein	PF00827	PTHR11847	KOG1678			GO:0003735,GO:0006412,GO:0005840,GO:0005622	AT4G16720.1
Gorai.007G029200	1	1	Homeobox-leucine zipper protein 4 (HB-4) / HD-ZIP protein	PF02183,PF00046,PF04618	PTHR24326,PTHR24326:SF218	KOG0483			GO:0003700,GO:0043565,GO:0006355,GO:0003677,GO:0005634,GO:0006351,GO:0016563	AT5G47370.1	HAT2
Gorai.007G031000	1	1	plastidial pyruvate kinase 3	PF00224,PF02887	PTHR11817	KOG2323	2.7.1.40	K00873	GO:0000287,GO:0004743,GO:0030955,GO:0006096	AT1G32440.1	PKp3
Gorai.007G033500	1	1	phospholipid/glycerol acyltransferase family protein	PF01553			2.3.1.15	K00630	GO:0016746,GO:0008152,GO:0008415	AT1G32200.1	ACT1,ATS1
Gorai.007G033600	1	1	Proteasome component (PCI) domain protein	PF01399	PTHR10539	KOG2908		K03039	GO:0005515	AT5G45620.1
Gorai.007G035000	1	1	Pentatricopeptide repeat (PPR) superfamily protein	PF01535	PTHR24015					AT1G74750.1
Gorai.007G035200	1	1	Leucine-rich repeat protein kinase family protein	PF00069,PF00560,PF08263	PTHR24420,PTHR24420:SF873	KOG1187			GO:0004672,GO:0005524,GO:0006468,GO:0005515	AT5G62710.1
Gorai.007G036800	1	1	TEOSINTE BRANCHED, cycloidea and PCF (TCP) 14	PF03634	PTHR11584:SF275,PTHR11584					AT3G47620.1	AtTCP14,TCP14
Gorai.007G036900	1	1	NAP1-related protein 2	PF00956	PTHR11875,PTHR11875:SF47	KOG1508		K11290	GO:0006334,GO:0005634	AT1G18800.1	NRP2
Gorai.007G038900	1	1	Ribosomal protein S5 family protein	PF03719,PF00333	PTHR13718,PTHR13718:SF4	KOG0877		K02981	GO:0003723,GO:0003735,GO:0006412,GO:0005622,GO:0005840	AT1G58380.1	XW6
Gorai.007G039200	1	1								AT5G07950.1
Gorai.007G039400	1	1	glycine-rich RNA-binding protein 3	PF00076	PTHR24012	KOG0107			GO:0003676	AT5G61030.1	GR-RBP3
Gorai.007G039800	1	1	reversibly glycosylated polypeptide 3	PF03214			2.4.1.-,5.4.99.-	K13379	GO:0008466,GO:0016758,GO:0007047,GO:0030244,GO:0005618,GO:0030054	AT3G08900.1	RGP,RGP3
Gorai.007G042000	1	1								AT5G50350.1
Gorai.007G042300	1	1	homolog of nucleolar protein NOP56	PF08060,PF08156,PF01798	PTHR10894	KOG2573		K14564		AT1G56110.1	NOP56
Gorai.007G042900	1	1
Gorai.007G043000	1	1	non-specific phospholipase C6	PF04185			3.1.4.3	K01114	GO:0016788	AT3G48610.1	NPC6
Gorai.007G043400	1	1	K-box region and MADS-box transcription factor family protein	PF01486,PF00319	PTHR11945:SF19,PTHR11945	KOG0014			GO:0003677,GO:0046983,GO:0003700,GO:0006355,GO:0005634,GO:0043565	AT2G42830.1	AGL5,SHP2
Gorai.007G043500	1	1	Squamosa promoter-binding protein-like (SBP domain) transcription factor family protein	PF03110					GO:0003677,GO:0005634	AT5G50670.1
Gorai.007G045500	1	1	calnexin 1	PF00262	PTHR11073	KOG0675		K08054	GO:0005509	AT5G61790.1	ATCNX1,CNX1
Gorai.007G046500	1	1	Ribosomal protein L23/L15e family protein	PF00827	PTHR11847	KOG1678		K02877	GO:0003735,GO:0006412,GO:0005840,GO:0005622	AT4G16720.1
Gorai.007G048200	1	1	Ribosomal protein L2 family	PF00181,PF03947	PTHR13691:SF4,PTHR13691	KOG2309		K02938	GO:0003735,GO:0006412,GO:0005622,GO:0005840	AT4G36130.1
Gorai.007G050000	1	1	MAP kinase 7	PF00069	PTHR24055,PTHR24055:SF69	KOG0660	2.7.11.24	K08293	GO:0004672,GO:0005524,GO:0006468,GO:0016773,GO:0009103,GO:0016020	AT2G18170.1	ATMPK7,MPK7
Gorai.007G054700	1	1	poly(A) binding protein 4	PF00076,PF00658	PTHR24011,PTHR24011:SF69	KOG0123		K13126	GO:0003676,GO:0003723	AT2G23350.1	PAB4,PABP4
Gorai.007G055500	1	1	PTEN 2	PF10409,PF00782	PTHR12305:SF8,PTHR12305	KOG2283			GO:0008138,GO:0006470,GO:0005515	AT3G19420.1	ATPEN2,PEN2
Gorai.007G056500	1	1	Translation protein SH3-like family protein	PF00467	PTHR11143	KOG3401			GO:0015934,GO:0006412,GO:0003735	AT3G49910.1
Gorai.007G056600	1	1	NADH-ubiquinone oxidoreductase-related	PF04800	PTHR12219	KOG3389	1.6.5.3,1.6.99.3	K03937	GO:0016651,GO:0022900,GO:0005743	AT5G67590.1	FRO1
Gorai.007G060000	1	1	RAB GTPase homolog A4A	PF00071	PTHR24073,PTHR24073:SF213	KOG0087		K07976	GO:0005525,GO:0007264,GO:0005622	AT5G65270.1	AtRABA4a,RABA4a
Gorai.007G060700	1	1	RAB GTPase homolog H1E	PF00071	PTHR24073,PTHR24073:SF256	KOG0094		K07976	GO:0003924,GO:0005525,GO:0007264,GO:0005634,GO:0005737,GO:0005622	AT5G10260.1	AtRABH1e,RABH1e
Gorai.007G061800	1	1	Ribosomal protein L7Ae/L30e/S12e/Gadd45 family protein	PF01248	PTHR11449	KOG2988		K02908	GO:0006412,GO:0005840,GO:0005622,GO:0003735	AT1G36240.1
Gorai.007G062700	1	1	copper ion binding;cobalt ion binding;zinc ion binding							AT2G21870.1	MGP1
Gorai.007G066400	1	1								AT2G41350.1
Gorai.007G066900	1	1	Glycosyl hydrolases family 31 protein	PF01055	PTHR22762:SF7,PTHR22762	KOG1066	3.2.1.84	K05546	GO:0004553,GO:0005975	AT5G63840.1	PSL5,RSW3
Gorai.007G068400	1	1	Protein of unknown function (DUF803)	PF05653	PTHR12570	KOG2922			GO:0016020	AT2G21120.1
Gorai.007G068700	1	1	SNARE associated Golgi protein family	PF09335	PTHR12677	KOG3140				AT1G44960.1
Gorai.007G068800	1	1	xyloglucan endotransglucosylase/hydrolase 5	PF00722,PF06955			2.4.1.207	K08235	GO:0004553,GO:0005975,GO:0016762,GO:0006073,GO:0005618,GO:0048046	AT5G13870.1	EXGT-A4,XTH5
Gorai.007G069400	1	none	LOB domain-containing protein 2	PF03195						AT1G06280.1	LBD2
Gorai.007G069700	1	1								AT2G42860.1
Gorai.007G071200	1	1	Pentatricopeptide repeat (PPR) superfamily protein	PF01535	PTHR24015					AT1G11290.1	CRR22
Gorai.007G073200	1	1	PIN domain-like family protein	PF04900	PTHR12416	KOG3164				AT2G34570.1	MEE21
Gorai.007G073300	1	1	Protein kinase superfamily protein	PF07714	PTHR24420,PTHR24420:SF451	KOG1187			GO:0004672,GO:0005524,GO:0006468	AT3G26700.1
Gorai.007G073800	1	1	Rubisco methyltransferase family protein	PF09273	PTHR13271	KOG1337				AT5G14260.1
Gorai.007G073900	1	1	Ankyrin repeat family protein	PF00023	PTHR24158:SF289,PTHR24158	KOG4412			GO:0005515	AT3G01750.1
Gorai.007G074000	1	1	glyceraldehyde-3-phosphate dehydrogenase C2	PF00044,PF02800	PTHR10836	KOG0657	1.2.1.12	K00134	GO:0016620,GO:0055114	AT1G13440.1	GAPC-2,GAPC2
Gorai.007G076800	1	1	HIS HF	PF00977,PF00117	PTHR21235:SF2,PTHR21235	KOG0623	2.4.2.-,4.1.3.-	K01663	GO:0000105,GO:0003824,GO:0009236	AT4G26900.1	AT-HF,HISN4
Gorai.007G078500	1	1	high mobility group	PF00505,PF03531	PTHR13711,PTHR13711:SF59	KOG0526		K09272	GO:0005515,GO:0003677,GO:0005634	AT3G28730.1	ATHMG,HMG,NFD,SSRP1
Gorai.007G079400	1	1
Gorai.007G080700	1	1	early nodulin-like protein 17	PF02298					GO:0005507,GO:0009055	AT5G15350.1	AtENODL17,ENODL17
Gorai.007G081400	1	1	membrane-anchored ubiquitin-fold protein 1 precursor							AT3G01050.1	MUB1
Gorai.007G081900	1	1	Insulinase (Peptidase family M16) protein	PF00675,PF05193	PTHR11851:SF58,PTHR11851	KOG0960	3.4.24.64	K01412	GO:0004222,GO:0006508,GO:0008270	AT3G02090.1	MPPBETA
Gorai.007G082500	1	1
Gorai.007G083500	1	1	NAD(P)-binding Rossmann-fold superfamily protein	PF01370	PTHR10366,PTHR10366:SF9	KOG1502			GO:0003854,GO:0016616,GO:0006694,GO:0055114,GO:0003824,GO:0050662,GO:0044237	AT5G19440.1
Gorai.007G084200	1	1	Ras-related small GTP-binding family protein	PF00071	PTHR24073,PTHR24073:SF256	KOG0092			GO:0005525,GO:0007264	AT2G44610.1	ATRAB6A,ATRABH1B,RAB6,RAB6A
Gorai.007G084500	1	1	Protein of unknown function (DUF581)	PF04570						AT2G44670.1
Gorai.007G085300	1	1	cyclin p4;1	PF08613	PTHR15615	KOG1674			GO:0019901,GO:0000079	AT2G44740.1	CYCP4;1
Gorai.007G085900	1	1	Proteasome component (PCI) domain protein	PF01399	PTHR15350,PTHR15350:SF5	KOG3250			GO:0005515	AT1G02090.1	ATCSN7,COP15,CSN7,FUS5
Gorai.007G086700	1	1	homeobox-leucine zipper protein 4	PF02183,PF00046,PF04618	PTHR24326,PTHR24326:SF218	KOG0483		K09338	GO:0003700,GO:0043565,GO:0006355,GO:0003677,GO:0005634,GO:0006351,GO:0016563	AT2G44910.1	ATHB-4,ATHB4,HB4
Gorai.007G087300	1	1	alpha/beta-Hydrolases superfamily protein	PF02450					GO:0008374,GO:0006629,GO:0004607	AT2G44970.2
Gorai.007G088400	1	1	cyclin p3;1	PF08613	PTHR15615	KOG1674			GO:0019901,GO:0000079	AT2G45080.1	cycp3;1
Gorai.007G089800	1	1	golgi snare 12	PF12352	PTHR21094	KOG3208		K08495	GO:0016021,GO:0006888,GO:0005801,GO:0000139	AT2G45200.1	ATGOS12,GOS12
Gorai.007G092400	1	1	growth-regulating factor 9	PF08879,PF08880					GO:0005515,GO:0005524,GO:0016818,GO:0006355,GO:0005634	AT2G45480.1	AtGRF9,GRF9
Gorai.007G093000	1	1	Calcium-dependent lipid-binding (CaLB domain) family protein	PF00168	PTHR10774:SF2,PTHR10774	KOG1030			GO:0005515	AT3G61050.1	NTMC2T4,NTMC2TYPE4
Gorai.007G093900	1	1	calcineurin B subunit-related	PF01553	PTHR23063,PTHR23063:SF1	KOG4666	2.3.1.23,2.3.1.67	K13510	GO:0016746,GO:0008152,GO:0008415	AT2G45670.1
Gorai.007G094200	1	1	TCP family transcription factor	PF03634	PTHR11584:SF275,PTHR11584					AT2G45680.1
Gorai.007G096500	1	1	signal recognition particle receptor protein, chloroplast (FTSY)	PF00448,PF02881	PTHR11564,PTHR11564:SF10			K03110	GO:0005525,GO:0006614	AT2G45770.1	CPFTSY,FRD4
Gorai.007G097900	1	1	Arabidopsis thaliana protein of unknown function (DUF821)	PF05686	PTHR12203:SF11,PTHR12203	KOG2458				AT5G23850.1
Gorai.007G098800	1	1	Bestrophin-like protein	PF01062						AT3G61320.1
Gorai.007G099000	1	1	Acyl-CoA thioesterase family protein	PF02551,PF00027	PTHR11066,PTHR11066:SF8	KOG3016	3.1.2.2	K01068	GO:0016291,GO:0006637	AT1G01710.1
Gorai.007G099300	1	1	basic helix-loop-helix (bHLH) DNA-binding superfamily protein		PTHR11514,PTHR11514:SF8					AT5G41315.1	GL3,MYC6.2
Gorai.007G100300	1	1	cytochrome P450, family 86, subfamily A, polypeptide 8	PF00067	PTHR24296	KOG0157	1.14.-.-	K00517	GO:0005506,GO:0009055,GO:0016705,GO:0020037,GO:0055114	AT2G45970.1	CYP86A8,LCR
Gorai.007G103300	1	1	RING/U-box superfamily protein	PF00097	PTHR22937:SF22,PTHR22937	KOG0827		K11985		AT4G01270.1
Gorai.007G103500	1	1	alpha/beta-Hydrolases superfamily protein	PF00561	PTHR10992,PTHR10992:SF200					AT3G61540.1
Gorai.007G104100	1	1	golgin candidate 4							AT2G46180.1	GC4
Gorai.007G104300	1	1	glycosyl transferase family 1 protein	PF00534	PTHR12526:SF56,PTHR12526				GO:0009058	AT4G01210.1
Gorai.007G105300	1	1	3\'-5\'-exoribonuclease family protein	PF01138,PF03725	PTHR11953	KOG1068			GO:0003723,GO:0006396	AT3G61620.1	RRP41
Gorai.007G106000	1	1	gamma-tubulin	PF03953,PF00091	PTHR11588,PTHR11588:SF7	KOG1374		K10389	GO:0051258,GO:0043234,GO:0003924,GO:0005525,GO:0006184,GO:0007017,GO:0005874	AT3G61650.1	TUBG1
Gorai.007G106100	1	1	Nucleotide-sugar transporter family protein	PF04142	PTHR10231,PTHR10231:SF6	KOG2234			GO:0016020,GO:0005351,GO:0008643,GO:0000139,GO:0016021,GO:0055085	AT5G41760.1
Gorai.007G107800	1	1	P-loop containing nucleoside triphosphate hydrolases superfamily protein	PF00271,PF00270	PTHR24031,PTHR24031:SF28	KOG0342			GO:0003676,GO:0005524,GO:0008026,GO:0004386,GO:0003677,GO:0016787	AT5G08610.1
Gorai.007G109000	1	1	cofactor of nitrate reductase and xanthine dehydrogenase 3	PF01967	PTHR22960	KOG2876		K03639	GO:0006777	AT1G01290.1	CNX3
Gorai.007G109100	1	1	Transcription factor jumonji (jmjC) domain-containing protein	PF08879,PF02373	PTHR12549:SF1,PTHR12549				GO:0005515	AT4G00990.1
Gorai.007G109500	1	1	auxin response factor 18	PF02309,PF06507,PF02362					GO:0006355,GO:0005634,GO:0003677,GO:0009725	AT3G61830.1	ARF18
Gorai.007G114200	1	1	AP2/B3-like transcriptional factor family protein	PF02362					GO:0003677,GO:0006355	AT1G01030.1	NGA3
Gorai.007G114800	1	1	Protein of unknown function (DUF1295)	PF06966		KOG4650				AT2G46890.1
Gorai.007G117100	1	1	Ribosomal protein L7Ae/L30e/S12e/Gadd45 family protein	PF01248	PTHR21596,PTHR21596:SF4	KOG3387				AT4G01790.1
Gorai.007G118600	1	1	Protein phosphatase 2C family protein	PF00481	PTHR13832,PTHR13832:SF169	KOG1323			GO:0003824	AT2G46920.1	POL
Gorai.007G119000	1	1	inner membrane protein OXA1-like							AT2G46470.1	OXA1L
Gorai.007G119500	1	1	ubiquitin 6	PF00240,PF01599	PTHR10666	KOG0004		K02977	GO:0005515,GO:0003735,GO:0006412,GO:0005622,GO:0005840	AT2G47110.1	UBQ6
Gorai.007G119900	1	1	Polyketide cyclase/dehydrase and lipid transport superfamily protein	PF03364						AT1G02475.1
Gorai.007G122300	1	1	WRKY DNA-binding protein 35	PF03106					GO:0003700,GO:0043565,GO:0006355	AT2G34830.1	AtWRKY35,MEE24,WRKY35
Gorai.007G124500	1	1	phosphoribosylformylglycinamidine cyclo-ligase, chloroplast / phosphoribosyl-aminoimidazole synthetase / AIR synthase (PUR5)	PF02769,PF00586	PTHR10520		6.3.3.1	K01933	GO:0003824	AT3G55010.1	ATPURM,PUR5
Gorai.007G124900	1	1	importin alpha isoform 1	PF00514,PF01749	PTHR23316	KOG0166			GO:0005515,GO:0008565,GO:0006606,GO:0005634,GO:0005737,GO:0006886,GO:0005643	AT3G06720.1	AIMP ALPHA,AT-IMP,ATKAP ALPHA,IMPA-1,IMPA1
Gorai.007G126400	1	1	Ribosomal protein L19e family protein	PF01280	PTHR10722				GO:0003735,GO:0006412,GO:0005622,GO:0005840	AT3G16780.1
Gorai.007G127200	1	1	AtL5	PF00097	PTHR22764					AT3G62690.1	ATL5
Gorai.007G127800	1	1	photolyase/blue-light receptor 2	PF03441,PF00875	PTHR11455	KOG0133			GO:0003913,GO:0006281	AT2G47590.1	PHR2
Gorai.007G128000	1	1	Ribosomal L22e protein family	PF01776	PTHR10064	KOG3434			GO:0003735,GO:0006412,GO:0005622,GO:0005840	AT3G05560.1
Gorai.007G131100	1	1	Uncharacterised protein family (UPF0497)	PF04535	PTHR11615:SF56,PTHR11615					AT4G15630.1
Gorai.007G131300	1	1	F-box/RNI-like superfamily protein		PTHR23125:SF17,PTHR23125	KOG1947		K14485		AT3G62980.1	TIR1
Gorai.007G132400	1	1	Rho GTPase activating protein with PAK-box/P21-Rho-binding domain	PF00620,PF00786	PTHR23177:SF2,PTHR23177	KOG4270			GO:0007165,GO:0005622,GO:0005515	AT4G03100.1
Gorai.007G134500	1	1	REF4-related 1							AT3G23590.1	MED33A,RFR1
Gorai.007G134700	1	1	ERD (early-responsive to dehydration stress) family protein	PF02714	PTHR13018:SF5,PTHR13018	KOG1134			GO:0016020	AT4G02900.1
Gorai.007G135600	1	1			PTHR16223,PTHR16223:SF1					AT5G64980.1
Gorai.007G135900	1	1	TRICHOME BIREFRINGENCE-LIKE 11	PF03005	PTHR13533,PTHR13533:SF3					AT5G19160.1	TBL11
Gorai.007G136900	1	1	cyclin p1;1	PF08613	PTHR15615	KOG1674			GO:0019901,GO:0000079	AT3G63120.1	CYCP1;1
Gorai.007G139000	1	1	Cytokine-induced anti-apoptosis inhibitor 1, Fe-S biogenesis	PF08241,PF05093	PTHR13273,PTHR13273:SF5				GO:0008168,GO:0008152	AT5G18400.2
Gorai.007G139500	1	1	ETO1-like 1		PTHR23083,PTHR23083:SF141					AT4G02680.1	EOL1
Gorai.007G140900	1	1								AT3G63430.1
Gorai.007G141200	1	1	Guanylate-binding family protein	PF02841,PF02263	PTHR10751	KOG2037			GO:0003924,GO:0005525	AT2G38840.1
Gorai.007G142900	1	1	Ribosomal protein S19 family protein		PTHR11880				GO:0006412,GO:0005840,GO:0003735	AT5G09500.1
Gorai.007G145300	1	1	Tetratricopeptide repeat (TPR)-like superfamily protein		PTHR19959:SF78,PTHR19959	KOG1840				AT2G31240.1
Gorai.007G146600	1	1	Rho termination factor	PF07498					GO:0006353,GO:0003715	AT1G06190.1
Gorai.007G147600	1	1	ribophorin II (RPN2) family protein	PF05817	PTHR12640	KOG2447			GO:0004579,GO:0018279,GO:0005789,GO:0008250	AT4G21150.1	HAP6
Gorai.007G147900	1	1	Ribosomal protein L14	PF01929	PTHR11127	KOG3421		K02875	GO:0003735,GO:0006412,GO:0005622,GO:0005840	AT4G27090.1
Gorai.007G149400	1	1	Ribosomal protein L14p/L23e family protein	PF00238	PTHR11761	KOG0901		K02894	GO:0003735,GO:0006412,GO:0005840	AT1G04480.1
Gorai.007G149600	1	1	homolog of SU(var)3-9 1	PF05033,PF10440,PF00856	PTHR22884,PTHR22884:SF23	KOG1082			GO:0005515,GO:0008270,GO:0018024,GO:0034968,GO:0005634	AT1G04050.1	SDG13,SUVR1
Gorai.007G149900	1	1	Plant protein of unknown function (DUF946)	PF06101	PTHR17204:SF20,PTHR17204					AT1G04090.1
Gorai.007G150600	1	1	Tetratricopeptide repeat (TPR)-like superfamily protein		PTHR22904,PTHR22904:SF125					AT1G04130.1
Gorai.007G151700	1	1	heat shock protein 60	PF00118	PTHR11353:SF9,PTHR11353	KOG0356		K04077	GO:0005524,GO:0044267	AT3G23990.1	HSP60,HSP60-3B
Gorai.007G152100	1	1	Acyl-CoA N-acyltransferases (NAT) superfamily protein	PF00583	PTHR23091,PTHR23091:SF4	KOG3235	2.3.1.88	K00670	GO:0008080,GO:0016747,GO:0008152	AT5G13780.1
Gorai.007G153300	1	1	GTP-binding family protein	PF08701,PF01926	PTHR11089:SF14,PTHR11089	KOG2484		K14538	GO:0005525,GO:0015093,GO:0015684,GO:0016021,GO:0005622	AT3G07050.1
Gorai.007G154600	1	1	Ribosomal protein L13 family protein	PF00572	PTHR11545	KOG3204		K02872	GO:0003735,GO:0006412,GO:0005840	AT5G48760.1
Gorai.007G156100	1	1	structural constituent of nuclear pore	PF05064	PTHR12084	KOG2196		K14306	GO:0017056,GO:0005643	AT2G45000.1	EMB2766
Gorai.007G158300	1	1	Ribosomal protein L32e	PF01655	PTHR23413	KOG0878		K02912	GO:0003735,GO:0006412,GO:0005622,GO:0005840	AT4G18100.1
Gorai.007G158500	1	1	lipase class 3 family protein	PF01764	PTHR21493,PTHR21493:SF24				GO:0004806,GO:0006629	AT3G07400.1
Gorai.007G158800	1	1	stomagen							AT4G12970.1	EPFL9,STOMAGEN
Gorai.007G159700	1	1	Actin binding Calponin homology (CH) domain-containing protein	PF00307	PTHR19961,PTHR19961:SF9	KOG0046			GO:0005515	AT5G48460.1
Gorai.007G160100	1	1	Polynucleotidyl transferase, ribonuclease H-like superfamily protein	PF04857	PTHR15092,PTHR15092:SF7	KOG1990			GO:0005634	AT3G25430.1
Gorai.007G164500	1	1								AT2G04235.1
Gorai.007G168500	1	1
Gorai.007G168600	1	1
Gorai.007G169000	1	1	Protein of unknown function (DUF1664)	PF07889						AT1G04960.1
Gorai.007G169700	1	1	PDI-like 2-2	PF00085	PTHR18929	KOG0191	5.3.4.1	K09584	GO:0045454	AT1G04980.1	ATPDI10,ATPDIL2-2,PDI10,PDIL2-2
Gorai.007G170600	1	1	glycosyl hydrolase 9B8	PF00759	PTHR22298				GO:0004553,GO:0005975	AT2G32990.1	AtGH9B8,GH9B8
Gorai.007G173500	1	1	ATP-dependent caseinolytic (Clp) protease/crotonase family protein	PF00378	PTHR11941,PTHR11941:SF19	KOG1684	3.1.2.4	K05605	GO:0003824,GO:0008152	AT1G06550.1
Gorai.007G174100	1	1	Ribosomal L27e protein family	PF01777,PF00467	PTHR10497	KOG3418			GO:0003735,GO:0006412,GO:0005622,GO:0005840	AT4G15000.1
Gorai.007G176800	1	1	N2,N2-dimethylguanosine tRNA methyltransferase	PF02005	PTHR10631	KOG1253	2.1.1.32	K00555	GO:0003723,GO:0004809,GO:0008033	AT3G02320.1
Gorai.007G179800	1	1	DegP protease 7	PF00595	PTHR22939:SF15,PTHR22939				GO:0005515	AT3G03380.1	DegP7
Gorai.007G180000	1	1	zinc finger (MYND type) family protein / programmed cell death 2 C-terminal domain-containing protein	PF01753,PF04194	PTHR12298,PTHR12298:SF12	KOG2061			GO:0008270,GO:0005737	AT4G02220.1
Gorai.007G180200	1	1			PTHR24619:SF141,PTHR24619					AT5G16030.1
Gorai.007G182400	1	1	ortholog of maize chloroplast splicing factor CRS1	PF01985		KOG1990			GO:0003723	AT5G16180.1	ATCRS1,CRS1
Gorai.007G185300	1	1	Thiamine pyrophosphate dependent pyruvate decarboxylase family protein	PF02775,PF02776,PF00205	PTHR18968:SF6,PTHR18968	KOG1185	4.1.-.-	K12261	GO:0000287,GO:0030976,GO:0003824	AT5G17380.1
Gorai.007G185900	1	1								AT3G51500.1
Gorai.007G186000	1	1	receptor-like kinase 1	PF00069,PF00560,PF08263	PTHR24420,PTHR24420:SF537	KOG1187			GO:0004672,GO:0005524,GO:0006468,GO:0005515	AT1G48480.1	RKL1
Gorai.007G187200	1	1	Protein kinase superfamily protein	PF00069	PTHR24420:SF644,PTHR24420	KOG1187			GO:0004672,GO:0005524,GO:0006468	AT5G38560.1
Gorai.007G187900	1	1	transmembrane kinase 1	PF00069,PF00560,PF08263	PTHR24420,PTHR24420:SF467	KOG1187			GO:0004672,GO:0005524,GO:0006468,GO:0005515	AT1G66150.1	TMK1
Gorai.007G188100	1	1								AT5G16550.1
Gorai.007G191200	1	1	Eukaryotic aspartyl protease family protein	PF00026	PTHR13683,PTHR13683:SF98	KOG1339			GO:0004190,GO:0006508	AT4G35880.1
Gorai.007G193100	1	1	proteasome alpha subunit D2	PF00227,PF10584	PTHR11599,PTHR11599:SF15	KOG0183	3.4.25.1	K02731	GO:0004298,GO:0051603,GO:0005839,GO:0004175,GO:0006511,GO:0019773	AT5G66140.1	PAD2
Gorai.007G197000	1	1	Serine carboxypeptidase S28 family protein	PF05577	PTHR11010,PTHR11010:SF2	KOG2182			GO:0008236,GO:0006508	AT4G36195.1
Gorai.007G198700	1	1	RTE1-homolog	PF05608	PTHR20921	KOG3150				AT3G51040.1	RTH
Gorai.007G198900	1	1	beta-galactosidase 3	PF02140,PF01301	PTHR23421,PTHR23421:SF2	KOG0496			GO:0004553,GO:0005975,GO:0005529,GO:0004565,GO:0009341	AT4G36360.1	BGAL3
Gorai.007G199000	1	1								AT3G51010.1
Gorai.007G199600	1	1	Ribosomal protein L12 family protein	PF00542	PTHR11809:SF6,PTHR11809	KOG1715			GO:0003735,GO:0006412,GO:0005622,GO:0005840	AT4G36420.1
Gorai.007G200900	1	1	phosducin-like protein 3 homolog		PTHR21148,PTHR21148:SF14					AT5G66410.1	PLP3b
Gorai.007G202400	1	1	AAA-type ATPase family protein	PF12037,PF00004	PTHR23075	KOG0742			GO:0005524	AT2G18330.1
Gorai.007G203400	1	1	Vacuolar sorting protein 39	PF10367,PF10366,PF00780,PF00637	PTHR12894:SF5,PTHR12894	KOG2063			GO:0006886,GO:0016192,GO:0005083	AT4G36630.1	EMB2754
Gorai.007G204600	1	1	Protein of unknown function (DUF1195)	PF06708						AT4G36660.1
Gorai.007G205800	1	1	Protein kinase superfamily protein	PF07714	PTHR23257:SF83,PTHR23257	KOG0192			GO:0004672,GO:0005524,GO:0006468	AT5G66710.1
Gorai.007G206100	1	1	Quinone reductase family protein	PF03358		KOG3135			GO:0010181,GO:0016491,GO:0009055,GO:0050662	AT4G36750.1
Gorai.007G206200	1	1	Major facilitator superfamily protein	PF07690	PTHR24003,PTHR24003:SF22	KOG1330			GO:0055085,GO:0016021	AT4G36790.1
Gorai.007G207700	1	1								AT2G23690.1
Gorai.007G208300	1	1	Protein kinase superfamily protein	PF00069	PTHR24420,PTHR24420:SF852	KOG1187			GO:0004672,GO:0005524,GO:0006468	AT2G23450.1
Gorai.007G208600	1	1	AP2/B3-like transcriptional factor family protein	PF02362					GO:0003677,GO:0006355	AT3G18990.1	REM39,VRN1
Gorai.007G208700	1	1	cytochrome P450, family 82, subfamily C, polypeptide 4	PF00067	PTHR24298:SF44,PTHR24298	KOG0156			GO:0005506,GO:0009055,GO:0016705,GO:0020037,GO:0055114	AT4G31940.1	CYP82C4
Gorai.007G213800	1	1	ralf-like 34	PF05498						AT5G67070.1	RALFL34
Gorai.007G214400	1	1	PLC-like phosphodiesterases superfamily protein							AT4G36945.1
Gorai.007G215200	1	1	SET domain-containing protein	PF00856	PTHR22884,PTHR22884:SF18		2.1.1.43	K11430	GO:0005515	AT2G23380.1	CLF,ICU1,SDG1,SET1
Gorai.007G216400	1	1	P-loop containing nucleoside triphosphate hydrolases superfamily protein	PF00225	PTHR24115,PTHR24115:SF174	KOG0244			GO:0003777,GO:0005524,GO:0007018	AT5G47820.1	FRA1
Gorai.007G217600	1	1	UDP-Glycosyltransferase superfamily protein		PTHR13036					AT1G16570.1
Gorai.007G221100	1	1	Subtilase family protein	PF05922,PF00082,PF02225	PTHR10795,PTHR10795:SF17				GO:0004252,GO:0006508,GO:0042802,GO:0043086	AT5G67360.1	ARA12
Gorai.007G221400	1	1	Major facilitator superfamily protein	PF05631	PTHR24003,PTHR24003:SF253	KOG4332				AT2G23093.1
Gorai.007G221600	1	1	Phototropic-responsive NPH3 family protein	PF00651,PF03000	PTHR13690:SF174,PTHR13690				GO:0005515,GO:0004871,GO:0009416	AT5G67385.1
Gorai.007G221700	1	1								AT5G67390.1
Gorai.007G223100	1	1	Translation protein SH3-like family protein	PF00467	PTHR11143	KOG3401			GO:0015934,GO:0006412,GO:0003735	AT3G49910.1
Gorai.007G223900	1	1	ADP-ribosylation factor-like A1C	PF00025	PTHR11711,PTHR11711:SF20	KOG0075			GO:0003924,GO:0005525,GO:0007264,GO:0005634,GO:0005737,GO:0005622	AT3G49870.1	ARLA1C,ATARLA1C
Gorai.007G224900	1	1	P-loop containing nucleoside triphosphate hydrolases superfamily protein	PF06068	PTHR11093	KOG2680	3.6.4.12	K11338	GO:0005524,GO:0003678,GO:0006260,GO:0009378,GO:0006281,GO:0006310	AT5G67630.1
Gorai.007G226900	1	1	squalene epoxidase 3	PF08491	PTHR10835	KOG1298			GO:0004506,GO:0050660,GO:0055114,GO:0016021	AT4G37760.1	SQE3
Gorai.007G227300	1	1								AT3G49720.1
Gorai.007G228700	1	1	Leucine-rich receptor-like protein kinase family protein	PF00069,PF00560	PTHR24420:SF462,PTHR24420	KOG1187			GO:0004672,GO:0005524,GO:0006468,GO:0005515	AT5G65700.1	BAM1
Gorai.007G232400	1	1	Kinase interacting (KIP1-like) family protein	PF07765						AT2G22560.1
Gorai.007G232600	1	1								AT3G49645.1
Gorai.007G232700	1	1	O-fucosyltransferase family protein	PF10250						AT5G65470.1
Gorai.007G233000	1	1	Protein-tyrosine phosphatase-like, PTPLA	PF04387	PTHR11035,PTHR11035:SF14	KOG3187				AT5G10480.1	PAS2,PEP
Gorai.007G233100	1	1	kinesin like protein for actin based chloroplast movement 1	PF00225	PTHR24115,PTHR24115:SF244	KOG0239			GO:0003777,GO:0005524,GO:0007018	AT5G10470.1	KAC1,KCA1
Gorai.007G233400	1	1	uncoupling protein 5	PF00153	PTHR24089,PTHR24089:SF78	KOG0759				AT2G22500.1	ATPUMP5,DIC1,UCP5
Gorai.007G234300	1	1	RAB GTPase homolog A4A	PF00071	PTHR24073,PTHR24073:SF213	KOG0087		K07976	GO:0003924,GO:0005525,GO:0007264,GO:0005622	AT5G65270.1	AtRABA4a,RABA4a
Gorai.007G234700	1	1	Ribosomal protein S6e	PF01092	PTHR11502	KOG1646		K02991	GO:0003735,GO:0006412,GO:0005622,GO:0005840	AT5G10360.1	EMB3010,RPS6B
Gorai.007G235400	1	1	Protein of unknown function, DUF617	PF04759						AT5G65340.1
Gorai.007G237000	1	1	C-CAP/cofactor C-like domain-containing protein	PF07986	PTHR15139	KOG2512				AT4G39920.1	POR,TFC C
Gorai.007G238500	1	1	RAB GTPase homolog H1E	PF00071	PTHR24073,PTHR24073:SF256	KOG0094			GO:0003924,GO:0005525,GO:0007264,GO:0005634,GO:0005737,GO:0005622	AT5G10260.1	AtRABH1e,RABH1e
Gorai.007G241800	1	1	aspartate aminotransferase	PF00155	PTHR11751:SF35,PTHR11751	KOG0257			GO:0016740,GO:0030170,GO:0009058,GO:0016769	AT2G22250.2	AAT,ATAAT,MEE17
Gorai.007G242900	1	1	Ribosomal protein L7Ae/L30e/S12e/Gadd45 family protein	PF01248	PTHR11449	KOG2988			GO:0006412,GO:0005840,GO:0005622,GO:0003735	AT1G36240.1
Gorai.007G244500	1	1	shikimate kinase 1	PF01202	PTHR21087		2.7.1.71	K00891	GO:0004765,GO:0005524	AT2G21940.4	ATSK1,SK1
Gorai.007G245500	1	1	Glutathione S-transferase family protein	PF02798,PF00043	PTHR11260:SF16,PTHR11260	KOG0406			GO:0005515	AT1G10370.1	ATGSTU17,ERD9,GST30,GST30B
Gorai.007G245700	1	1	exocyst complex component sec3A	PF09763	PTHR16092:SF13,PTHR16092	KOG2148				AT1G47550.1	SEC3A
Gorai.007G246100	1	1	Tetratricopeptide repeat (TPR)-like superfamily protein		PTHR26312,PTHR26312:SF65					AT4G39470.1
Gorai.007G247000	1	1
Gorai.007G250600	1	1	UDP-GLUCOSE PYROPHOSPHORYLASE 1	PF01704,PF00318	PTHR11952,PTHR11952:SF1	KOG2638			GO:0003735,GO:0006412,GO:0005622,GO:0005840,GO:0016779,GO:0008152	AT3G03250.1	AtUGP1,UGP,UGP1
Gorai.007G255600	1	1								AT5G37480.1
Gorai.007G261500	1	1	cellulose synthase like E1	PF03552	PTHR13301,PTHR13301:SF23				GO:0016760,GO:0030244,GO:0016020	AT1G55850.1	ATCSLE1,CSLE1
Gorai.007G262200	1	1	arabinogalactan protein 14							AT5G56540.1	AGP14,ATAGP14
Gorai.007G263900	1	1	ATP binding;leucine-tRNA ligases;aminoacyl-tRNA ligases;nucleotide binding;ATP binding;aminoacyl-tRNA ligases	PF00133,PF08264	PTHR11946:SF10,PTHR11946	KOG0437	6.1.1.4	K01869	GO:0000166,GO:0004812,GO:0005524,GO:0006418,GO:0005737,GO:0006412	AT1G09620.1
Gorai.007G264300	1	1	acyl carrier protein 3	PF00550	PTHR20863,PTHR20863:SF12	KOG1748			GO:0048037	AT1G54630.1	ACP3
Gorai.007G268500	1	1	non-photochemical quenching 1	PF07137			1.10.99.3	K09839	GO:0046422,GO:0055114,GO:0009507	AT1G08550.1	AVDE1,NPQ1
Gorai.007G268900	1	1								AT5G18310.2
Gorai.007G271700	1	1	GDSL-like Lipase/Acylhydrolase superfamily protein	PF00657	PTHR22835,PTHR22835:SF39				GO:0016788,GO:0006629	AT5G33370.1
Gorai.007G272300	1	1	transferases;sulfuric ester hydrolases;catalytics;transferases		PTHR12250				GO:0016740,GO:0006506,GO:0005789	AT3G01380.1
Gorai.007G273300	1	1	Haem oxygenase-like, multi-helical	PF03070	PTHR20858:SF7,PTHR20858					AT5G32470.1
Gorai.007G275100	1	1
Gorai.007G275500	1	1	endoribonucleases	PF01042,PF01902	PTHR12196	KOG2316				AT3G04480.1
Gorai.007G276600	1	1	phosphoenolpyruvate carboxylase kinase 1	PF00069	PTHR24349	KOG0032			GO:0004672,GO:0005524,GO:0006468	AT1G08650.1	ATPPCK1,PPCK1
Gorai.007G279600	1	1	SSXT family protein	PF05030	PTHR23107	KOG3227				AT5G28640.1	AN3,ATGIF1,GIF,GIF1
Gorai.007G282200	1	1
Gorai.007G283600	1	1	Protein of unknown function (DUF1000)	PF06201	PTHR10438:SF1,PTHR10438				GO:0045454,GO:0015035,GO:0009055,GO:0006662	AT3G04780.1
Gorai.007G285300	1	1	with no lysine (K) kinase 1	PF00069	PTHR13902:SF38,PTHR13902	KOG0584	2.7.11.1	K12132	GO:0004672,GO:0005524,GO:0006468	AT3G04910.1	ATWNK1,WNK1,ZIK4
Gorai.007G285500	1	1	Ribosomal protein S24e family protein	PF01282	PTHR10496	KOG3424		K02974	GO:0003735,GO:0006412,GO:0005622,GO:0005840	AT5G28060.1
Gorai.007G286300	1	1	basic transcription factor 3	PF01849	PTHR10351	KOG2240		K01527		AT1G17880.1	ATBTF3,BTF3
Gorai.007G286600	1	1	S-adenosyl-L-methionine-dependent methyltransferases superfamily protein							AT3G05100.1
Gorai.007G287100	1	1	NOP56-like pre RNA processing ribonucleoprotein	PF08060,PF08156,PF01798	PTHR10894	KOG2572		K14565		AT5G27120.1
Gorai.007G287200	1	1	Protein kinase superfamily protein	PF00069	PTHR24056,PTHR24056:SF77	KOG0600			GO:0004672,GO:0005524,GO:0006468	AT1G54610.2
Gorai.007G287300	1	1
Gorai.007G287400	1	1
Gorai.007G287800	1	1	GATA transcription factor 9	PF00320	PTHR10071:SF113,PTHR10071				GO:0003700,GO:0008270,GO:0043565,GO:0006355	AT4G32890.1	GATA9
Gorai.007G288800	1	1	TCP-1/cpn60 chaperonin family protein	PF00118	PTHR11353:SF19,PTHR11353	KOG0362			GO:0005524,GO:0044267,GO:0051082,GO:0006457	AT3G03960.1
Gorai.007G288900	1	1	evolutionarily conserved C-terminal region 2	PF04146	PTHR12357:SF6,PTHR12357	KOG1901				AT3G13460.1	ECT2
Gorai.007G291900	1	1	ROP binding protein kinases 2	PF07714	PTHR24420:SF794,PTHR24420	KOG1187			GO:0004672,GO:0005524,GO:0006468	AT3G05140.1	RBK2
Gorai.007G299100	1	1
Gorai.007G299600	1	1	Heavy metal transport/detoxification superfamily protein	PF00403	PTHR22814,PTHR22814:SF16	KOG1603			GO:0046872,GO:0030001	AT5G27690.1
Gorai.007G299700	1	1	Ribosomal protein S21e	PF01249	PTHR10442	KOG3486		K02971	GO:0003735,GO:0006412,GO:0005622,GO:0005840	AT5G27700.1
Gorai.007G300700	1	1	Ribosomal L22e protein family	PF01776	PTHR10064	KOG3434			GO:0003735,GO:0006412,GO:0005622,GO:0005840	AT3G05560.1
Gorai.007G302200	1	1	F-box family protein		PTHR23125:SF147,PTHR23125	KOG1947				AT5G27920.1
Gorai.007G302300	1	1	Protein of unknown function (DUF1399)	PF07173						AT1G56230.1
Gorai.007G302900	1	1	Protein phosphatase 2C family protein	PF00481	PTHR13832,PTHR13832:SF94	KOG0698			GO:0003824	AT5G27930.1
Gorai.007G303000	1	1								AT1G56260.1
Gorai.007G303900	1	1	syntaxin of plants 43	PF00804,PF05739	PTHR19957:SF57,PTHR19957	KOG0809		K08489	GO:0016020,GO:0005515	AT3G05710.2	ATSYP43,SYP43
Gorai.007G304300	1	1	DEA(D/H)-box RNA helicase family protein	PF00271,PF00270	PTHR24031,PTHR24031:SF11	KOG0330			GO:0003676,GO:0005524,GO:0008026,GO:0004386	AT5G60990.1
Gorai.007G305100	1	1	Tetratricopeptide repeat (TPR)-like superfamily protein	PF01535	PTHR24015,PTHR24015:SF76					AT1G09190.1
Gorai.007G305200	1	1	Protein of unknown function (DUF1645)	PF07816						AT3G62630.1
Gorai.007G305300	1	1			PTHR21726,PTHR21726:SF12					AT5G26910.1
Gorai.007G307000	1	1	20S proteasome beta subunit G1	PF00227	PTHR11599,PTHR11599:SF5	KOG0185	3.4.25.1	K02736	GO:0004298,GO:0051603,GO:0005839	AT1G56450.1	PBG1
Gorai.007G307100	1	1	SUPPRESSOR OF AUXIN RESISTANCE1	PF11715	PTHR21286	KOG4521		K14303		AT1G33410.2	ATNUP160,NUP160,SAR1
Gorai.007G307500	1	1	basic helix-loop-helix (bHLH) DNA-binding superfamily protein							AT1G09250.1
Gorai.007G307600	1	1								AT5G49525.1
Gorai.007G310400	1	1	Ribosomal protein S10p/S20e family protein	PF00338	PTHR11700,PTHR11700:SF5	KOG0900		K02946	GO:0003735,GO:0006412,GO:0005622,GO:0005840	AT3G13120.1
Gorai.007G313600	1	1	Small nuclear ribonucleoprotein family protein	PF01423	PTHR15588	KOG1784		K12627		AT1G65700.3
Gorai.007G313800	1	1								AT3G18310.1
Gorai.007G317600	1	1	plastid developmental protein DAG, putative		PTHR10795,PTHR10795:SF75					AT1G11430.1
Gorai.007G319500	1	1	F-box and associated interaction domains-containing protein	PF07734,PF00646					GO:0005515	AT3G23880.1
Gorai.007G325700	1	1	Basic-leucine zipper (bZIP) transcription factor family protein	PF00170	PTHR13301,PTHR13301:SF29				GO:0003700,GO:0043565,GO:0046983,GO:0006355	AT3G58120.1	ATBZIP61,BZIP61
Gorai.007G325800	1	1	sodium/calcium exchanger family protein / calcium-binding EF hand family protein	PF01699	PTHR10891,PTHR10891:SF44				GO:0055085,GO:0016021	AT1G53210.1
Gorai.007G326000	1	1	Protein kinase superfamily protein	PF00069	PTHR24420,PTHR24420:SF679	KOG1187			GO:0004672,GO:0005524,GO:0006468	AT1G16670.1
Gorai.007G326500	1	1	GCK domain-containing protein	PF07802						AT1G14060.1
Gorai.007G341200	1	1	regulatory particle triple-A ATPase 5A	PF00004	PTHR23073:SF7,PTHR23073	KOG0652		K03065	GO:0005524,GO:0009378,GO:0006281,GO:0006310,GO:0016887	AT3G05530.1	ATS6A.2,RPT5A
Gorai.007G342000	1	1	acyl-CoA binding protein 4	PF00887,PF07646	PTHR23244,PTHR23244:SF29	KOG0379			GO:0000062,GO:0005515	AT3G05420.2	ACBP4
Gorai.007G343200	1	1	adenosine-5\'-phosphosulfate (APS) kinase 3	PF01583	PTHR11055	KOG0635	2.7.1.25	K00860	GO:0004020,GO:0005524,GO:0000103,GO:0016772,GO:0016301	AT3G03900.1	APK3
Gorai.007G344500	1	1	Pre-rRNA-processing protein TSR2, conserved region	PF10273	PTHR21250	KOG4032				AT5G27990.1
Gorai.007G345400	1	1	Chloroplast J-like domain 1	PF11833						AT1G08640.1	CJD1
Gorai.007G345800	1	1
Gorai.007G345900	1	1	APR-like 5	PF00085	PTHR18929	KOG2640			GO:0045454	AT3G03860.1	APRL5,ATAPRL5
Gorai.007G346900	1	1	disease resistance protein (TIR-NBS-LRR class), putative	PF01582,PF00560,PF00931	PTHR11017,PTHR11017:SF20	KOG4658			GO:0005515,GO:0043531,GO:0007165,GO:0005622,GO:0045087,GO:0031224,GO:0004888,GO:0006915,GO:0005524	AT5G17680.1
Gorai.007G347600	1	1	tubulin folding cofactor A (KIESEL)	PF02970	PTHR21500	KOG3470			GO:0051082,GO:0007021,GO:0005874	AT2G30410.1	KIS,TFCA
Gorai.007G348800	1	1	Protein kinase superfamily protein							AT5G16810.1
Gorai.007G351700	1	1	Cyclin family protein	PF00134,PF02984	PTHR10177,PTHR10177:SF24	KOG0653		K05868	GO:0005634	AT5G06150.1	CYC1BAT,CYCB1;2
Gorai.007G351800	1	1	myosin heavy chain-related		PTHR26369,PTHR26369:SF18					AT3G56480.1
Gorai.007G352500	1	1	F-box family protein	PF00646					GO:0005515	AT2G32560.1
Gorai.007G353100	1	1	P-loop containing nucleoside triphosphate hydrolases superfamily protein	PF00225	PTHR24115,PTHR24115:SF177	KOG0242		K11498	GO:0003777,GO:0005524,GO:0007018	AT3G10180.1
Gorai.007G353300	1	1	embryo sac development arrest 7	PF08159	PTHR14927	KOG2321			GO:0005634	AT3G56990.1	EDA7
Gorai.007G353600	1	1	eukaryotic translation initiation factor 2 beta subunit	PF01873	PTHR23001	KOG2768		K03238	GO:0003743,GO:0006413	AT5G20920.1	EIF2 BETA,EMB1401
Gorai.007G353800	1	1	binding		PTHR14222	KOG0414		K06677		AT3G57060.2
Gorai.007G355500	1	1			PTHR10774:SF5,PTHR10774					AT3G57200.1
Gorai.007G357400	1	1	RNA-binding (RRM/RBD/RNP motifs) family protein	PF00076	PTHR13976	KOG0114			GO:0003676	AT5G66010.1
Gorai.007G359300	1	1
Gorai.007G359700	1	1	Domain of unknown function (DUF23)	PF01697	PTHR21461	KOG4735				AT2G33570.1
Gorai.007G359800	1	1	guanylate kinase	PF00625	PTHR23117:SF1,PTHR23117	KOG0707			GO:0005515	AT3G57550.2	AGK2,GK-2
Gorai.007G360200	1	1	Uncharacterized protein		PTHR12444	KOG1877				AT2G41830.1
Gorai.007G360700	1	1	ARM repeat superfamily protein	PF08161	PTHR21576,PTHR21576:SF5	KOG1248				AT4G23540.1
Gorai.007G361700	1	1	basic helix-loop-helix (bHLH) DNA-binding superfamily protein	PF00010	PTHR12565,PTHR12565:SF7				GO:0030528,GO:0006355	AT3G57800.2
Gorai.007G361900	1	1	Ribosomal protein L6 family protein	PF01159,PF03868	PTHR10715	KOG1694		K02934	GO:0003735,GO:0006412,GO:0005622,GO:0005840	AT1G74050.1
Gorai.007G370400	1	1	Pentatricopeptide repeat (PPR) superfamily protein	PF01535	PTHR24015					AT3G02490.1
Gorai.007G370500	1	1	IQ calmodulin-binding motif family protein							AT3G52870.1
Gorai.007G372400	1	1	ARM repeat superfamily protein		PTHR23120	KOG2032				AT2G36810.1
Gorai.007G372900	1	1	Protein phosphatase 2A regulatory B subunit family protein	PF01603	PTHR10257	KOG2085			GO:0008601,GO:0007165,GO:0000159	AT3G09880.1	ATB\' BETA
Gorai.007G374700	1	1	Ribosomal protein L4/L1 family	PF00573	PTHR19431	KOG1475		K02930	GO:0003735,GO:0006412,GO:0005840	AT3G09630.1
Gorai.007G375800	1	1	Transcription factor DP	PF02319,PF08781	PTHR12548:SF1,PTHR12548	KOG2829			GO:0003700,GO:0006355,GO:0005667	AT5G02470.1	DPA
Gorai.008G000400	1	1	TCP-1/cpn60 chaperonin family protein	PF00118	PTHR11353:SF22,PTHR11353	KOG0361			GO:0005524,GO:0044267,GO:0051082,GO:0006457	AT3G11830.1
Gorai.008G005000	1	1	Small nuclear ribonucleoprotein family protein	PF01423	PTHR23338	KOG3428		K11087		AT4G02840.1
Gorai.008G005900	1	1	GTP binding Elongation factor Tu family protein	PF03144,PF03143,PF00009	PTHR23115,PTHR23115:SF31	KOG0460	3.6.5.3	K02358	GO:0003924,GO:0005525,GO:0006414,GO:0005622,GO:0003746	AT4G02930.1
Gorai.008G006300	1	1	Major facilitator superfamily protein	PF00083	PTHR24063,PTHR24063:SF74	KOG0254			GO:0022857,GO:0055085,GO:0016021	AT2G48020.1
Gorai.008G006500	1	1	receptor-like kinase in in flowers 3	PF00069	PTHR24420:SF895,PTHR24420	KOG1187			GO:0004672,GO:0005524,GO:0006468	AT2G48010.1	RKF3
Gorai.008G008100	1	1	DEGP protease 2	PF00089	PTHR22939,PTHR22939:SF1	KOG1320			GO:0004252,GO:0006508	AT2G47940.1	DEGP2
Gorai.008G011300	1	1	2-oxoglutarate (2OG) and Fe(II)-dependent oxygenase superfamily protein	PF03171	PTHR13069,PTHR13069:SF10				GO:0016491,GO:0016706,GO:0055114	AT4G02485.1
Gorai.008G012200	1	1	Nucleotide-sugar transporter family protein	PF03151	PTHR11132	KOG1441			GO:0055085	AT1G21070.1
Gorai.008G016400	1	1	LMBR1-like membrane protein	PF04791	PTHR21355	KOG2296				AT5G65290.1
Gorai.008G016500	1	1	minichromosome maintenance 9	PF00493	PTHR11630,PTHR11630:SF48	KOG0477		K10738	GO:0003677,GO:0005524,GO:0006260,GO:0016851,GO:0015979,GO:0015995,GO:0016887	AT2G14050.1	MCM9
Gorai.008G017400	1	1	Haloacid dehalogenase-like hydrolase (HAD) superfamily protein	PF03031	PTHR17901:SF6,PTHR17901	KOG4549			GO:0005515	AT2G14110.1
Gorai.008G018200	1	1	mitochondrial HSO70 2	PF00012	PTHR19375,PTHR19375:SF1	KOG0102		K03283	GO:0000902,GO:0005524	AT5G09590.1	HSC70-5,MTHSC70-2
Gorai.008G018300	1	1	mitochondrial HSO70 2	PF00012	PTHR19375,PTHR19375:SF1	KOG0102		K03283	GO:0000902,GO:0005524	AT5G09590.1	HSC70-5,MTHSC70-2
Gorai.008G024200	1	1	PLC-like phosphodiesterases superfamily protein							AT1G49740.1
Gorai.008G026400	1	1	embryo defective 1273							AT1G49510.1	emb1273
Gorai.008G027500	1	1								AT4G20020.2
Gorai.008G027900	1	1	UDP-glucose:glycoprotein glucosyltransferases;transferases, transferring hexosyl groups;transferases, transferring glycosyl groups	PF01501	PTHR11226				GO:0016757,GO:0006486,GO:0003980	AT1G71220.2	EBS1,PSL2,UGGT
Gorai.008G028000	1	1	UDP-glucose:glycoprotein glucosyltransferases;transferases, transferring hexosyl groups;transferases, transferring glycosyl groups	PF06427	PTHR11226	KOG1879			GO:0003980,GO:0006486	AT1G71220.2	EBS1,PSL2,UGGT
Gorai.008G028800	1	1								AT4G39300.1
Gorai.008G028900	1	1	Alpha-helical ferredoxin		PTHR10849	KOG3256				AT1G79010.1
Gorai.008G029900	1	1	Ribosomal protein S25 family protein	PF03297	PTHR12850,PTHR12850:SF8	KOG1767				AT4G39200.1
Gorai.008G032700	1	1	YEATS family protein	PF03366	PTHR23195:SF15,PTHR23195	KOG3149		K11341	GO:0006355,GO:0005634	AT5G45600.1	GAS41,TAF14B
Gorai.008G034300	1	1	Protein of unknown function (DUF803)	PF05653	PTHR12570	KOG2922			GO:0016020	AT2G21120.1
Gorai.008G034500	1	1	glycine-rich protein	PF06273	PTHR13290:SF5,PTHR13290					AT4G38710.1
Gorai.008G035300	1	1	actin depolymerizing factor 5	PF00241	PTHR11913	KOG1735			GO:0003779,GO:0005622	AT2G16700.1	ADF5,ATADF5
Gorai.008G037800	1	1	mitochondrial editing factor 9	PF01535	PTHR24015					AT1G62260.1	MEF9
Gorai.008G037900	1	1	Ataxia telangiectasia-mutated and RAD3-related	PF02260,PF02259,PF08064,PF00454	PTHR11139,PTHR11139:SF7	KOG0890	2.7.11.1	K06640	GO:0016773,GO:0005515,GO:0004674	AT5G40820.1	ATATR,ATR,ATRAD3
Gorai.008G038000	1	1	F-box/RNI-like superfamily protein	PF00646	PTHR23125,PTHR23125:SF54				GO:0005515	AT2G17020.1
Gorai.008G040600	1	1	Protein of unknown function (DUF300)	PF03619	PTHR23423:SF2,PTHR23423	KOG2641				AT4G38360.2	LAZ1
Gorai.008G041200	1	1	Ubiquinol-cytochrome C reductase hinge protein	PF02320	PTHR15336	KOG4763	1.10.2.2	K00416	GO:0008121,GO:0006122	AT1G15120.2
Gorai.008G042500	1	1								AT5G64480.1
Gorai.008G044200	1	1	CSL zinc finger domain-containing protein	PF05207	PTHR21454,PTHR21454:SF3	KOG2923				AT2G15910.1
Gorai.008G044900	1	1	ATP phosphoribosyl transferase 2	PF08029,PF01634	PTHR21403	KOG2831	2.4.2.17	K00765	GO:0003879,GO:0000105,GO:0005737,GO:0000287	AT1G09795.1	ATATP-PRT2,ATP-PRT2,HISN1B
Gorai.008G046100	1	1	RNA-binding KH domain-containing protein		PTHR11208,PTHR11208:SF25	KOG1588				AT1G09660.1
Gorai.008G046300	1	1	Translation elongation factor EF1B, gamma chain	PF00647,PF02798,PF00043	PTHR11260,PTHR11260:SF7	KOG1627		K03233	GO:0003746,GO:0006414,GO:0005853,GO:0005515	AT1G57720.1
Gorai.008G046700	1	1	Beta-glucosidase, GBA2 type family protein	PF04685,PF12215	PTHR12654	KOG2119			GO:0004348,GO:0006665,GO:0016021	AT5G49900.1
Gorai.008G048200	1	1	TCP-1/cpn60 chaperonin family protein	PF00118	PTHR11353:SF11,PTHR11353	KOG0356			GO:0005524,GO:0044267	AT5G18820.1	EMB3007
Gorai.008G048400	1	1	HISTIDINE TRIAD NUCLEOTIDE-BINDING 2	PF01230	PTHR23089	KOG3275				AT1G31160.1	HINT 2
Gorai.008G049000	1	1	short-chain dehydrogenase-reductase B	PF00106	PTHR24315	KOG0725	1.3.1.34	K13237	GO:0016491,GO:0008152	AT3G12800.1	DECR,SDRB
Gorai.008G050000	1	1	urease accessory protein D	PF01774					GO:0016151,GO:0006807	AT2G35035.1	URED
Gorai.008G050300	1	1	Pectin lyase-like superfamily protein							AT4G20040.1
Gorai.008G051400	1	1		PF01535	PTHR24015					AT4G01400.3
Gorai.008G052300	1	1	Arp2/3 complex, 34 kD subunit p34-Arc	PF04045	PTHR12058	KOG2826		K05758	GO:0030833,GO:0005856	AT1G30825.1	ARPC2A,DIS2
Gorai.008G053100	1	1	BIG PETAL P	PF00010	PTHR12565,PTHR12565:SF7				GO:0030528,GO:0006355	AT1G59640.1	BPE,BPEp,BPEub,ZCW32
Gorai.008G053600	1	1	Threonyl-tRNA synthetase	PF03129,PF02824,PF07973,PF00587	PTHR11451,PTHR11451:SF5	KOG1637	6.1.1.3	K01868	GO:0000166,GO:0004812,GO:0005524,GO:0006418,GO:0005737,GO:0016876,GO:0043039,GO:0006412	AT5G26830.1
Gorai.008G054500	1	1	ARM repeat superfamily protein	PF08216	PTHR14978	KOG2734		K12864		AT3G02710.1
Gorai.008G054800	1	1	nijmegen breakage syndrome 1	PF00498	PTHR12162				GO:0005515	AT3G02680.1	ATNBS1,NBS1
Gorai.008G055500	1	1								AT5G38380.1
Gorai.008G058500	1	1	dsRNA-binding domain-like superfamily protein	PF00035					GO:0003725,GO:0005622	AT1G09700.1	DRB1,HYL1
Gorai.008G059200	1	1		PF10046		KOG4559				AT5G49550.1
Gorai.008G061300	1	1	mevalonate diphosphate decarboxylase 1		PTHR10977:SF2,PTHR10977				GO:0008299,GO:0004163	AT2G38700.1	ATMVD1,MVD1
Gorai.008G061800	1	1	2-oxoglutarate (2OG) and Fe(II)-dependent oxygenase superfamily protein	PF03171	PTHR10869	KOG1591	1.14.11.2	K00472	GO:0016491,GO:0016706,GO:0055114	AT5G66060.1
Gorai.008G062500	1	1	cold shock domain protein 1	PF00313,PF00098	PTHR11544,PTHR11544:SF12	KOG3070			GO:0003676,GO:0008270,GO:0003677,GO:0006355	AT4G36020.1	CSDP1
Gorai.008G064500	1	1	Protein of unknown function (DUF1640)	PF07798		KOG3156				AT3G51090.1
Gorai.008G065300	1	1	basic leucine-zipper 44	PF00170	PTHR22952:SF60,PTHR22952				GO:0003700,GO:0043565,GO:0046983,GO:0006355	AT1G75390.1	AtbZIP44,bZIP44
Gorai.008G067400	1	1	tubby like protein 2	PF01167,PF00646	PTHR16517:SF7,PTHR16517	KOG2502			GO:0005515	AT2G18280.1	AtTLP2,TLP2
Gorai.008G068200	1	1	succinate dehydrogenase 1-1	PF02910,PF00890	PTHR11632:SF5,PTHR11632	KOG2403	1.3.5.1	K00234	GO:0009055,GO:0016491,GO:0055114	AT5G66760.1	SDH1-1
Gorai.008G068700	1	1	Tetratricopeptide repeat (TPR)-like superfamily protein	PF01535	PTHR24015					AT4G36680.1
Gorai.008G071600	1	1	AP2/B3-like transcriptional factor family protein	PF02362					GO:0003677,GO:0006355	AT3G18990.1	REM39,VRN1
Gorai.008G073500	1	1	Ribosomal protein L25/Gln-tRNA synthetase, anti-codon-binding domain							AT5G66860.1
Gorai.008G078300	1	1	Granulin repeat cysteine protease family protein	PF00112,PF08246	PTHR12411:SF44,PTHR12411	KOG1543			GO:0008234,GO:0006508	AT5G43060.1
Gorai.008G078400	1	1	CYCLIN D3;2	PF00134,PF02984	PTHR10177,PTHR10177:SF76	KOG0656		K14505	GO:0005634	AT5G67260.1	CYCD3;2
Gorai.008G079900	1	1	arabinogalactan protein 18							AT4G37450.1	AGP18,ATAGP18
Gorai.008G083200	1	1	FK506-binding protein 13	PF00254	PTHR10516	KOG0549	5.2.1.8	K01802	GO:0006457	AT5G45680.1	ATFKBP13,FKBP13
Gorai.008G084100	1	1	Galactosyl transferase GMA12/MNN10 family protein	PF05637		KOG4748			GO:0016758,GO:0016021	AT2G22900.1
Gorai.008G084500	1	1	ARM repeat superfamily protein	PF04564	PTHR22849				GO:0004842,GO:0016567,GO:0000151	AT3G49810.1
Gorai.008G085000	1	1								AT5G65880.1
Gorai.008G086800	1	1	xyloglucan endotransglucosylase/hydrolase 6	PF00722,PF06955	PTHR10963,PTHR10963:SF14		2.4.1.207	K08235	GO:0004553,GO:0005975,GO:0016762,GO:0006073,GO:0005618,GO:0048046	AT5G65730.1	XTH6
Gorai.008G087500	1	1	Leucine-rich receptor-like protein kinase family protein	PF07714,PF00560,PF08263	PTHR24420:SF462,PTHR24420	KOG1187			GO:0004672,GO:0005524,GO:0006468,GO:0005515	AT5G65700.1	BAM1
Gorai.008G088600	1	1	Zincin-like metalloproteases family protein	PF01432	PTHR11804:SF7,PTHR11804				GO:0004222,GO:0006508	AT5G65620.1
Gorai.008G090000	1	1								AT4G39900.1
Gorai.008G090100	1	1	RAB GTPase homolog H1E	PF00071	PTHR24073,PTHR24073:SF256	KOG0094		K07976	GO:0003924,GO:0005525,GO:0007264,GO:0005634,GO:0005737,GO:0005622	AT5G10260.1	AtRABH1e,RABH1e
Gorai.008G090500	1	1	cyclin-dependent kinase-activating kinase assembly factor-related / CDK-activating kinase assembly factor-related	PF06391	PTHR12683,PTHR12683:SF3			K10842	GO:0007049,GO:0005634	AT4G30820.1
Gorai.008G091700	1	1		PF03959	PTHR22778	KOG2551				AT4G24380.1
Gorai.008G092100	1	1	CYCLIN D4;1	PF00134,PF02984	PTHR10177,PTHR10177:SF76	KOG0656			GO:0005634	AT5G65420.1	CYCD4;1
Gorai.008G096300	1	1	asparagine synthetase 3	PF00733	PTHR11772	KOG0571	6.3.5.4	K01953	GO:0004066,GO:0006529	AT5G10240.1	ASN3
Gorai.008G099400	1	1	Peroxisomal membrane 22 kDa (Mpv17/PMP22) family protein	PF04117	PTHR11266,PTHR11266:SF4	KOG1944			GO:0016021	AT2G42770.1
Gorai.008G100100	1	1	cellulose synthase 6		PTHR13301,PTHR13301:SF1					AT5G64740.1	CESA6,E112,IXR2,PRC1
Gorai.008G100200	1	1	cellulose synthase A9	PF03552	PTHR13301,PTHR13301:SF1				GO:0016760,GO:0030244,GO:0016020	AT2G21770.1	CESA09,CESA9
Gorai.008G101500	1	1	Domain of unknown function (DUF1726) ;Putative ATPase (DUF699)	PF05127,PF08351	PTHR10925	KOG2036	2.3.1.-	K14521		AT1G10490.1
Gorai.008G101600	1	1	RAB GTPase homolog G3A	PF00071	PTHR24073,PTHR24073:SF260	KOG0394			GO:0003924,GO:0005525,GO:0007264,GO:0005634,GO:0005737,GO:0005622	AT4G09720.1	ATRABG3A,RABG3A
Gorai.008G105100	1	1	Uncharacterized protein		PTHR12444	KOG1877				AT5G21080.1
Gorai.008G107300	1	1	squamosa promoter binding protein-like 10	PF03110					GO:0003677,GO:0005634	AT1G27370.1	SPL10
Gorai.008G107900	1	1	homeobox-leucine zipper protein 3	PF02183,PF00046,PF04618	PTHR24326,PTHR24326:SF218	KOG0483		K09338	GO:0003700,GO:0043565,GO:0006355,GO:0003677,GO:0005634,GO:0006351,GO:0016563	AT3G60390.1	HAT3
Gorai.008G108300	1	1	alpha/beta-Hydrolases superfamily protein	PF02089	PTHR11247:SF8,PTHR11247	KOG2541	3.1.2.22	K01074	GO:0008474,GO:0006464	AT3G60340.1
Gorai.008G111700	1	1								AT2G44600.1
Gorai.008G112700	1	1								AT3G52040.1
Gorai.008G112800	1	1	glutamine-fructose-6-phosphate transaminase (isomerizing)s;sugar binding;transaminases	PF01380,PF00310	PTHR10937	KOG1268	2.6.1.16	K00820	GO:0008152,GO:0005529,GO:0005975	AT3G24090.1
Gorai.008G113300	1	1	methionine aminopeptidase 1A	PF00557	PTHR10804,PTHR10804:SF13	KOG2738	3.4.11.18	K01265	GO:0009987	AT2G45240.1	MAP1A
Gorai.008G113500	1	1	Transketolase	PF02779,PF02780,PF00456	PTHR11624:SF1,PTHR11624	KOG0523			GO:0003824,GO:0008152	AT2G45290.1
Gorai.008G113600	1	1	RNA 3\'-terminal phosphate cyclase/enolpyruvate transferase, alpha/beta	PF00275	PTHR21090,PTHR21090:SF3	KOG0692	2.5.1.19	K00800	GO:0016765	AT2G45300.1
Gorai.008G118300	1	1	Remorin family protein	PF03766,PF03763						AT3G61260.1
Gorai.008G119400	1	1	RING/U-box superfamily protein	PF00097	PTHR14155:SF24,PTHR14155	KOG1493				AT3G61550.1
Gorai.008G119500	1	1	Pentatricopeptide repeat (PPR) superfamily protein	PF01535	PTHR24015:SF37,PTHR24015					AT3G61520.1
Gorai.008G119900	1	1	Protein kinase superfamily protein	PF07714	PTHR24420,PTHR24420:SF688	KOG1187			GO:0004672,GO:0005524,GO:0006468	AT1G01540.2
Gorai.008G121400	1	1	RHO guanyl-nucleotide exchange factor 3	PF03759					GO:0005089	AT4G00460.2	ATROPGEF3,ROPGEF3
Gorai.008G121500	1	1	Calcium-dependent lipid-binding (CaLB domain) family protein	PF00168		KOG1030			GO:0005515	AT4G00467.1
Gorai.008G123900	1	1	Protein of unknown function (DUF3133)	PF11331						AT3G61670.1
Gorai.008G124300	1	1	Glycosyl hydrolase superfamily protein	PF00704	PTHR11177:SF6,PTHR11177	KOG2091			GO:0004553,GO:0005975	AT4G01040.1
Gorai.008G125100	1	1	SET domain protein 14	PF00628,PF00855,PF00856	PTHR13793:SF5,PTHR13793	KOG1080			GO:0005515	AT3G61740.2	ATX3,SDG14
Gorai.008G128400	1	1	Rho GTPase activating protein with PAK-box/P21-Rho-binding domain	PF00620,PF00786	PTHR23177:SF2,PTHR23177				GO:0007165,GO:0005622,GO:0005515	AT2G46710.1
Gorai.008G128500	1	1	chitinase A	PF00704					GO:0004553,GO:0005975	AT5G24090.1	ATCHIA,CHIA
Gorai.008G129800	1	1	3-ketoacyl-CoA synthase 1	PF08392,PF08541					GO:0016746,GO:0009058,GO:0016747,GO:0006633,GO:0016020,GO:0008610,GO:0004315	AT1G01120.1	KCS1
Gorai.008G132200	1	1	pyrophosphorylase 1	PF00719	PTHR10286	KOG1626	3.6.1.1	K01507	GO:0000287,GO:0004427,GO:0006796,GO:0005737	AT1G01050.1	AtPPa1,PPa1
Gorai.008G132800	1	1	purple acid phosphatase 29	PF00149		KOG1432			GO:0016787	AT5G63140.1	ATPAP29,PAP29
Gorai.008G134500	1	1	Pectin lyase-like superfamily protein	PF00295					GO:0004650,GO:0005975	AT3G62110.1
Gorai.008G134700	1	1	Class II aaRS and biotin synthetases superfamily protein	PF03129,PF00587,PF09180	PTHR11451,PTHR11451:SF6	KOG4163	6.1.1.15	K01881	GO:0000166,GO:0004812,GO:0005524,GO:0006418,GO:0005737,GO:0004827,GO:0006433,GO:0006412	AT3G62120.1
Gorai.008G136400	1	1	Polynucleotidyl transferase, ribonuclease H-like superfamily protein							AT3G12410.1
Gorai.008G136500	1	1	Protein phosphatase 2C family protein	PF00481	PTHR13832,PTHR13832:SF147	KOG0698			GO:0003824	AT3G62260.2
Gorai.008G144400	1	1	Protein of unknown function, DUF538	PF04398						AT1G02816.1
Gorai.008G144500	1	1	Protein of unknown function, DUF538	PF04398						AT1G02816.1
Gorai.008G145000	1	1	Ribosomal L22e protein family	PF01776	PTHR10064	KOG3434			GO:0003735,GO:0006412,GO:0005622,GO:0005840	AT3G05560.1
Gorai.008G145400	1	1	zinc finger (CCCH type) helicase family protein	PF00271,PF00270	PTHR18934	KOG0330			GO:0003676,GO:0005524,GO:0008026,GO:0004386	AT2G47680.1
Gorai.008G146100	1	1	Transducin/WD40 repeat-like superfamily protein	PF00400	PTHR22889	KOG1188			GO:0005515	AT2G47790.1
Gorai.008G146900	1	1	Isoprenylcysteine carboxyl methyltransferase (ICMT) family	PF04140	PTHR12714	KOG2628	2.1.1.100	K00587	GO:0004671,GO:0006481,GO:0016021	AT5G08335.1	ATICMTB,ATSTE14B,ICMTB
Gorai.008G147000	1	1	myosin 1	PF00612,PF00063	PTHR13140,PTHR13140:SF37	KOG0160			GO:0003774,GO:0005524,GO:0016459,GO:0005515	AT3G19960.1	ATM1
Gorai.008G147800	1	1	TCP family transcription factor	PF03634	PTHR11584:SF275,PTHR11584					AT5G23280.1
Gorai.008G148400	1	1	Zinc-binding ribosomal protein family protein	PF00935	PTHR10369	KOG3464		K02929	GO:0003735,GO:0006412,GO:0005622,GO:0005840	AT3G23390.1
Gorai.008G148600	1	1	peptidoglycan-binding LysM domain-containing protein							AT5G08200.1
Gorai.008G152000	1	1
Gorai.008G152800	1	1	Protein of unknown function (DUF789)	PF05623						AT4G03420.1
Gorai.008G154500	1	1	ADP/ATP carrier 3	PF00153	PTHR24089:SF35,PTHR24089	KOG0749		K05863		AT4G28390.1	AAC3,ATAAC3
Gorai.008G154600	1	1	RING 1A	PF00097	PTHR10825,PTHR10825:SF4	KOG0311				AT5G44280.1	ATRING1A,RING1A
Gorai.008G159000	1	1	basic helix-loop-helix (bHLH) DNA-binding superfamily protein	PF00010	PTHR12565,PTHR12565:SF24				GO:0030528,GO:0006355	AT2G16910.1	AMS
Gorai.008G160500	1	1	Clathrin adaptor complexes medium subunit family protein	PF01217,PF00928	PTHR11998:SF11,PTHR11998	KOG0937		K12393	GO:0005515,GO:0006886,GO:0016192,GO:0030131	AT1G60780.1	HAP13
Gorai.008G162700	1	1	G-protein coupled receptors;GTPase activators	PF00615	PTHR10845,PTHR10845:SF44				GO:0038032,GO:0004871	AT3G26090.1	ATRGS1,RGS1
Gorai.008G164500	1	1								AT3G01810.1
Gorai.008G166400	1	1		PF11805
Gorai.008G167100	1	1	conserved peptide upstream open reading frame 28							AT1G70782.1	CPuORF28
Gorai.008G167700	1	1	Caleosin-related family protein	PF05042						AT1G70670.1
Gorai.008G168600	1	1	uracil dna glycosylase	PF03167	PTHR11264	KOG2994	3.2.2.-	K03648	GO:0006284,GO:0004844	AT3G18630.1	ATUNG,UNG
Gorai.008G168700	1	1	Tetratricopeptide repeat (TPR)-like superfamily protein	PF01535	PTHR24015:SF34,PTHR24015					AT2G02150.1
Gorai.008G171200	1	1	Leucine-rich repeat protein kinase family protein	PF00069,PF00560	PTHR24420,PTHR24420:SF779	KOG1187			GO:0004672,GO:0005524,GO:0006468,GO:0005515	AT1G10850.1
Gorai.008G173700	1	1	ARM repeat superfamily protein	PF03810	PTHR10997:SF9,PTHR10997	KOG2274			GO:0008565,GO:0006886	AT1G26170.1
Gorai.008G176100	1	1	Dihydropterin pyrophosphokinase / Dihydropteroate synthase	PF00809,PF01288	PTHR20941:SF1,PTHR20941		2.5.1.15,2.7.6.3	K13941	GO:0042558,GO:0003848,GO:0009396	AT4G30000.1
Gorai.008G176300	1	1	Protein kinase superfamily protein	PF00069	PTHR24361:SF93,PTHR24361	KOG0576			GO:0004672,GO:0005524,GO:0006468	AT1G69220.1	SIK1
Gorai.008G177200	1	1	Protein of unknown function, DUF647	PF04884	PTHR12770,PTHR12770:SF9	KOG4249				AT1G13770.1	RUS3
Gorai.008G178200	1	1	homologue of bacterial MinE 1	PF03776					GO:0032955,GO:0051301	AT1G69390.1	ARC12,ATMINE1,MINE1
Gorai.008G179500	1	1	EXS (ERD1/XPR1/SYG1) family protein	PF03105,PF03124	PTHR10783,PTHR10783:SF4	KOG1162			GO:0016021	AT1G14040.1
Gorai.008G181200	1	1	Ribosomal protein L34e superfamily protein	PF01199	PTHR10759	KOG1790		K02915	GO:0003735,GO:0006412,GO:0005622,GO:0005840	AT1G26880.1
Gorai.008G185600	1	1	allene oxide cyclase 4	PF06351			5.3.99.6	K10525	GO:0016853,GO:0009507	AT1G13280.1	AOC4
Gorai.008G187000	1	1	Hydroxyproline-rich glycoprotein family protein							AT3G25690.1	CHUP1
Gorai.008G189400	1	1	Stress responsive alpha-beta barrel domain protein	PF07876						AT2G32500.1
Gorai.008G189700	1	1	protein phosphatase 2A-2	PF00149	PTHR11668,PTHR11668:SF21	KOG0371	3.1.3.16	K04382	GO:0016787	AT1G10430.1	PP2A-2
Gorai.008G191600	1	1								AT5G62550.1
Gorai.008G196500	1	1	Leucine-rich repeat (LRR) family protein	PF00560	PTHR24420,PTHR24420:SF518	KOG4579			GO:0005515	AT5G61240.1
Gorai.008G199300	1	1	exocyst subunit exo70 family protein E2	PF03081	PTHR12542,PTHR12542:SF7	KOG2344		K07195	GO:0006887,GO:0000145	AT5G61010.1	ATEXO70E2,EXO70E2
Gorai.008G199900	1	1	Pentatricopeptide repeat (PPR) superfamily protein	PF01535	PTHR24015					AT5G60960.1
Gorai.008G201200	1	1	serine/threonine protein kinase 3	PF00069	PTHR22967	KOG2345			GO:0004672,GO:0005524,GO:0006468	AT5G08160.1	ATPK3,PK3
Gorai.008G203400	1	1		PF09415						AT1G78790.1
Gorai.008G203600	1	1
Gorai.008G205300	1	1	Leucine-rich repeat protein kinase family protein	PF07714,PF00560	PTHR24420,PTHR24420:SF465	KOG1187			GO:0004672,GO:0005524,GO:0006468,GO:0005515	AT5G14210.1
Gorai.008G205500	1	1	Translation elongation factor EF1B/ribosomal protein S6 family protein	PF00736	PTHR11595,PTHR11595:SF5	KOG1668		K03232	GO:0003746,GO:0006414,GO:0005853	AT2G18110.1
Gorai.008G206000	1	1			PTHR13403,PTHR13403:SF6	KOG3132		K13151		AT4G24880.1
Gorai.008G206700	1	1	nuclear factor Y, subunit C4	PF00808	PTHR10252,PTHR10252:SF6	KOG1657			GO:0003677,GO:0043565,GO:0005622	AT5G63470.2	NF-YC4
Gorai.008G207900	1	1	Nucleic acid-binding, OB-fold-like protein	PF02765	PTHR14513	KOG4757			GO:0003677,GO:0000723,GO:0000784	AT5G06310.1	AtPOT1b
Gorai.008G208100	1	1	Ribosomal protein L7Ae/L30e/S12e/Gadd45 family protein	PF01248	PTHR23105:SF1,PTHR23105	KOG3166				AT3G62870.1
Gorai.008G209300	1	1	translocase inner membrane subunit 8	PF02953	PTHR21535	KOG3489			GO:0006626,GO:0045039,GO:0042719	AT5G50810.1	TIM8
Gorai.008G209800	1	1	Glycosyltransferase family 29 (sialyltransferase) family protein	PF00777	PTHR11987,PTHR11987:SF15	KOG2692			GO:0008373,GO:0006486,GO:0030173	AT3G48820.1
Gorai.008G210100	1	1								AT3G48860.2
Gorai.008G210700	1	1	Protein Transporter, Pam16		PTHR12388					AT3G59280.1	TXR1
Gorai.008G211900	1	1	inositol polyphosphate kinase 2 beta	PF03770	PTHR12400:SF2,PTHR12400	KOG1620			GO:0008440	AT5G61760.1	ATIPK2BETA,IPK2B,IPK2BETA
Gorai.008G213300	1	1	cyclin p4;1	PF08613	PTHR15615	KOG1674			GO:0019901,GO:0000079	AT2G44740.1	CYCP4;1
Gorai.008G216800	1	1	Glycosyl hydrolases family 32 protein	PF08244,PF00251,PF11837		KOG0228			GO:0004564,GO:0004575	AT1G12240.1	ATBETAFRUCT4,VAC-INV
Gorai.008G218200	1	1	DNAse I-like superfamily protein	PF03372	PTHR12121,PTHR12121:SF10	KOG0620				AT1G31500.1
Gorai.008G218800	1	1	embryo defective 3006	PF03980						AT4G19350.1	EMB3006
Gorai.008G219000	1	1	xyloglucanase 113	PF03407	PTHR10994:SF5,PTHR10994				GO:0005783	AT2G35610.1	XEG113
Gorai.008G219900	1	1		PF09468	PTHR13383:SF10,PTHR13383	KOG4705		K10744	GO:0005634	AT4G20325.1
Gorai.008G220500	1	1	S-adenosyl-L-methionine-dependent methyltransferases superfamily protein	PF03141	PTHR10108,PTHR10108:SF55				GO:0008168,GO:0008152	AT4G19120.1	ERD3
Gorai.008G220800	1	1	DZC (Disease resistance/zinc finger/chromosome condensation-like region) domain containing protein	PF08381	PTHR22870:SF36,PTHR22870					AT1G31880.1	BRX,NLM9
Gorai.008G221300	1	1	Leucine-rich repeat (LRR) family protein		PTHR23155,PTHR23155:SF128					AT5G45520.1
Gorai.008G221400	1	1	Protein of unknown function (DUF594)	PF04578						AT5G45480.1
Gorai.008G222200	1	1	early-responsive to dehydration stress protein (ERD4)	PF02714	PTHR13018:SF5,PTHR13018	KOG1134			GO:0016020	AT1G32090.1
Gorai.008G222800	1	1	protein dimerizations							AT5G45610.1	SUV2
Gorai.008G223300	1	1	GHMP kinase family protein	PF08544,PF00288		KOG4519	2.7.4.2	K00938	GO:0005524,GO:0016310,GO:0016301	AT1G31910.1
Gorai.008G224000	1	1	Defender against death (DAD family) protein	PF02109	PTHR10705	KOG1746		K12668	GO:0016021	AT1G32210.1	ATDAD1
Gorai.008G224100	1	1
Gorai.008G227500	1	1	EYES ABSENT homolog		PTHR10190,PTHR10190:SF4					AT2G35320.1	ATEYA,EYA
Gorai.008G228900	1	1	S-adenosyl-L-methionine-dependent methyltransferases superfamily protein	PF03141	PTHR10108,PTHR10108:SF37				GO:0008168,GO:0008152	AT4G18030.1
Gorai.008G230300	1	1	Zinc-binding ribosomal protein family protein	PF01780	PTHR11517	KOG0402		K02921	GO:0003735,GO:0006412,GO:0005622,GO:0005840	AT3G10950.1
Gorai.008G230800	1	1	ureidoglycine aminohydrolase	PF07883						AT4G17050.1	UGLYAH
Gorai.008G233000	1	1	alpha/beta-Hydrolases superfamily protein	PF02089	PTHR11247:SF8,PTHR11247	KOG2541			GO:0008474,GO:0006464	AT3G60340.1
Gorai.008G233500	1	1	myb-like transcription factor family protein	PF00249	PTHR12374				GO:0003677	AT5G47390.1
Gorai.008G233600	1	1	acyl-CoA oxidase 1	PF01756,PF02770,PF00441	PTHR10909,PTHR10909:SF11	KOG0136	1.3.3.6	K00232	GO:0016627,GO:0055114,GO:0003997,GO:0006635,GO:0005777,GO:0003995	AT4G16760.1	ACX1,ATACX1
Gorai.008G234000	1	1	Ribosomal protein L23/L15e family protein	PF00827	PTHR11847	KOG1678			GO:0003735,GO:0006412,GO:0005840,GO:0005622	AT4G16720.1
Gorai.008G236700	1	1	Glycosyl hydrolases family 32 protein	PF08244,PF00251,PF11837		KOG0228	3.2.1.26	K01193	GO:0004564,GO:0004575	AT1G12240.1	ATBETAFRUCT4,VAC-INV
Gorai.008G237000	1	1	PLATZ transcription factor family protein	PF04640						AT3G60670.1
Gorai.008G238100	1	1	YbaK/aminoacyl-tRNA synthetase-associated domain	PF04073						AT4G16510.1
Gorai.008G240600	1	1	CLP protease proteolytic subunit 2	PF00574	PTHR10381	KOG0840	3.4.21.92	K01358	GO:0004252,GO:0006508	AT1G12410.1	CLP2,CLPR2,NCLPP2
Gorai.008G241800	1	1	growth-regulating factor 2	PF08879,PF08880					GO:0005515,GO:0005524,GO:0016818,GO:0006355,GO:0005634	AT4G37740.1	AtGRF2,GRF2
Gorai.008G242900	1	1	Eukaryotic translation initiation factor 2 subunit 1	PF07541,PF00575	PTHR10602	KOG2916		K03237	GO:0003723,GO:0003743,GO:0005850,GO:0006412	AT2G40290.1
Gorai.008G243000	1	1	TCP family transcription factor	PF03634	PTHR11584:SF275,PTHR11584					AT2G45680.1
Gorai.008G245300	1	1	GATA type zinc finger transcription factor family protein	PF00412	PTHR24206,PTHR24206:SF66	KOG1700			GO:0008270	AT2G45800.1
Gorai.008G245400	1	1	Remorin family protein	PF03763						AT5G23750.2
Gorai.008G247100	1	1	Protein of unknown function (DUF3741)	PF12552	PTHR21726					AT4G00440.2
Gorai.008G247200	1	1	acid-amino acid ligases;ligases;ATP binding;ATP binding;ligases	PF01225,PF02875,PF08245	PTHR23135,PTHR23135:SF4				GO:0005524,GO:0009058,GO:0016874	AT1G63680.1	ATMURE,MURE,PDE316
Gorai.008G247500	1	1	SIGNAL PEPTIDE PEPTIDASE-LIKE 2	PF04258,PF02225	PTHR12174,PTHR12174:SF30	KOG2442			GO:0004190,GO:0016021	AT1G63690.1	ATSPPL2,SPPL2
Gorai.008G249400	1	1	Pentatricopeptide repeat (PPR) superfamily protein	PF01535	PTHR24015					AT4G13650.1
Gorai.008G251000	1	1	calcium-dependent protein kinase 6	PF00069,PF00036	PTHR24349,PTHR24349:SF13	KOG0032	2.7.11.1	K13412	GO:0004672,GO:0005524,GO:0006468,GO:0016773,GO:0009103,GO:0016020	AT4G23650.1	CDPK6,CPK3
Gorai.008G251600	1	1		PF03417					GO:0042318
Gorai.008G253100	1	1	Transducin/WD40 repeat-like superfamily protein	PF00400	PTHR11024,PTHR11024:SF1	KOG2445			GO:0005515	AT1G64350.1	SEH1H
Gorai.008G254200	1	1	homolog of yeast oxidase assembly 1 (OXA1)	PF02096	PTHR12428,PTHR12428:SF3	KOG1239		K03217	GO:0051205,GO:0016021	AT5G62050.1	ATOXA1,OXA1,OXA1AT
Gorai.008G254600	1	1								AT4G23885.1
Gorai.008G254800	1	1	Nucleoside diphosphate kinase family protein	PF00334	PTHR11349	KOG0888	2.7.4.6	K00940	GO:0004550,GO:0005524,GO:0006165,GO:0006183,GO:0006228,GO:0006241	AT4G23900.1
Gorai.008G257700	1	1	Metal-dependent protein hydrolase	PF03690	PTHR11215	KOG2948				AT5G41970.1
Gorai.008G259400	1	1	branchless trichome							AT1G64690.1	BLT
Gorai.008G260900	1	1	translocase of the inner mitochondrial membrane 13	PF02953	PTHR19338	KOG1733			GO:0006626,GO:0045039,GO:0042719	AT1G61570.1	TIM13
Gorai.008G262200	1	1								AT1G73940.1
Gorai.008G262300	1	1	TMPIT-like protein	PF07851	PTHR21433				GO:0016021	AT4G10430.1
Gorai.008G263700	1	1	SPFH/Band 7/PHB domain-containing membrane-associated protein family	PF01145	PTHR10264,PTHR10264:SF26	KOG2620			GO:0016020	AT4G27585.1
Gorai.008G264600	1	1	nascent polypeptide-associated complex subunit alpha-like protein 2	PF01849,PF00627	PTHR21713	KOG2239		K03626	GO:0005515	AT3G49470.1	NACA2
Gorai.008G265800	1	1								AT5G53620.1
Gorai.008G266000	1	1	Ubiquitin supergroup;Ribosomal protein L40e	PF00240,PF01020	PTHR10666	KOG0003		K02927	GO:0005515,GO:0003735,GO:0006412,GO:0005840	AT2G36170.1
Gorai.008G266400	1	1	Major facilitator superfamily protein	PF05631	PTHR24003,PTHR24003:SF315	KOG4332			GO:0055085,GO:0016021	AT4G27720.1
Gorai.008G267100	1	1	Transducin/WD40 repeat-like superfamily protein	PF00400	PTHR14221	KOG0283			GO:0005515	AT5G53500.1
Gorai.008G267400	1	1	ARM repeat superfamily protein	PF03810,PF02985	PTHR10527:SF1,PTHR10527	KOG1241		K14293	GO:0005515,GO:0008565,GO:0006886	AT5G53480.1
Gorai.008G270000	1	1	Protein phosphatase 2C family protein	PF00481	PTHR13832,PTHR13832:SF186	KOG0698			GO:0003824	AT5G53140.1
Gorai.008G271100	1	1	plastid division1							AT5G53280.1	PDV1
Gorai.008G272900	1	1	VIRB2-interacting protein 2	PF02453	PTHR10994:SF27,PTHR10994	KOG1792			GO:0005783	AT4G11220.1	BTI2,RTNLB2
Gorai.008G275600	1	1	C2H2-like zinc finger protein							AT4G25610.1
Gorai.008G276200	1	1	Ribosomal protein L36e family protein	PF01158	PTHR10114	KOG3452		K02920	GO:0003735,GO:0006412,GO:0005622,GO:0005840	AT3G53740.2
Gorai.008G276300	1	1	cleavage and polyadenylation specificity factor 100	PF00753,PF07521,PF10996	PTHR11203:SF5,PTHR11203	KOG1135		K14402	GO:0016787	AT5G23880.1	ATCPSF100,CPSF100,EMB1265,ESP5
Gorai.008G279100	1	1		PF10268						AT5G52180.1
Gorai.008G281000	1	1	Protein of unknown function (DUF565)	PF04483						AT5G43050.1	NPQ6
Gorai.008G281800	1	1		PF04949						AT5G51840.1
Gorai.008G284100	1	1	ribosomal protein S13A	PF00312,PF08069	PTHR11885	KOG0400		K02953	GO:0003735,GO:0006412,GO:0005622,GO:0005840	AT4G00100.1	ATRPS13A,PFL2,RPS13,RPS13A
Gorai.008G284800	1	1	EXORDIUM like 3	PF04674						AT5G51550.1	EXL3
Gorai.008G284900	1	1	DNA photolyases;DNA photolyases	PF00561,PF00875	PTHR10992,PTHR10992:SF6	KOG1454			GO:0003913,GO:0006281	AT4G25290.1
Gorai.008G290300	1	1	Mitochondrial import inner membrane translocase subunit Tim17/Tim22/Tim23 family protein	PF02466	PTHR14110	KOG3225			GO:0015031,GO:0008565,GO:0005743	AT3G10110.1	MEE67
Gorai.008G291000	1	1	jasmonate-zim-domain protein 3	PF09425,PF06200				K13464	GO:0005515	AT3G17860.1	JAI3,JAZ3,TIFY6B
Gorai.008G291100	1	1	tRNA synthetase beta subunit family protein	PF03483,PF03484	PTHR10947	KOG2472	6.1.1.20	K01890	GO:0003723,GO:0004826,GO:0000287,GO:0005524,GO:0006432,GO:0006412	AT1G72550.1
Gorai.008G292300	1	1	TCP-1/cpn60 chaperonin family protein	PF00118	PTHR11353:SF21,PTHR11353	KOG0359			GO:0005524,GO:0044267,GO:0051082,GO:0006457	AT3G02530.1
Gorai.008G293300	1	1	homeodomain GLABROUS 11	PF01852,PF00046	PTHR24325:SF193,PTHR24325	KOG0484		K09338	GO:0003700,GO:0043565,GO:0006355	AT1G73360.1	ATHDG11,EDT1,HDG11
Gorai.008G293700	1	1	embryo defective 2759							AT5G63050.1	EMB2759
Gorai.008G295700	1	1	SGNH hydrolase-type esterase superfamily protein	PF00657	PTHR14209	KOG3035			GO:0016788,GO:0006629	AT5G62930.1
Gorai.008G297400	1	1	ribosomal protein L29 family protein	PF06984	PTHR21183:SF11,PTHR21183	KOG3331			GO:0003735,GO:0006412,GO:0005761	AT1G07830.1
Gorai.008G297600	1	1	GATA type zinc finger transcription factor family protein	PF00412	PTHR24206,PTHR24206:SF66	KOG1700			GO:0008270	AT1G10200.1	WLIM1
Gorai.008G297700	1	1								AT5G62575.1
Gorai.009G000900	1	1	Bifunctional inhibitor/lipid-transfer protein/seed storage 2S albumin superfamily protein	PF00234						AT1G55260.2
Gorai.009G003600	1	1	GDSL-like Lipase/Acylhydrolase superfamily protein	PF00657	PTHR22835,PTHR22835:SF39				GO:0016788,GO:0006629	AT1G29660.1
Gorai.009G005500	1	1	small nuclear ribonucleoprotein F	PF01423	PTHR11021	KOG3482		K11098		AT4G30220.1	RUXF
Gorai.009G008400	1	1	Leucine-rich repeat protein kinase family protein	PF00069,PF00560,PF08263	PTHR24420,PTHR24420:SF423	KOG1187			GO:0004672,GO:0005524,GO:0006468,GO:0005515	AT2G23950.1
Gorai.009G009300	1	1	DNA/RNA polymerases superfamily protein	PF00940	PTHR10102	KOG1038	2.7.7.6	K10908	GO:0003677,GO:0003899,GO:0006351	AT2G24120.1	PDE319,SCA3
Gorai.009G009600	1	1	Pentatricopeptide repeat (PPR) superfamily protein	PF01535	PTHR24015,PTHR24015:SF145					AT4G30700.1
Gorai.009G014100	1	1	Ankyrin repeat family protein with DHHC zinc finger domain	PF00023,PF01529	PTHR22883	KOG0509			GO:0005515,GO:0008270	AT5G20350.1	TIP1
Gorai.009G016900	1	1	Tetratricopeptide repeat (TPR)-like superfamily protein		PTHR26312:SF35,PTHR26312					AT5G20190.1
Gorai.009G020000	1	1	PPPDE putative thiol peptidase family protein	PF05903	PTHR12378					AT4G17486.1
Gorai.009G020400	1	1	protein arginine methyltransferase 10	PF05185	PTHR11006:SF34,PTHR11006	KOG1499			GO:0008168,GO:0005737,GO:0008276,GO:0006479,GO:0008152	AT1G04870.2	ATPRMT10,PRMT10
Gorai.009G021000	1	1	3-ketoacyl-CoA synthase 11	PF08392,PF08541					GO:0016746,GO:0009058,GO:0016747,GO:0006633,GO:0016020,GO:0008610	AT2G26640.1	KCS11
Gorai.009G021500	1	1	Pentatricopeptide repeat (PPR-like) superfamily protein	PF01535	PTHR24015,PTHR24015:SF127					AT1G31430.1
Gorai.009G021600	1	1	golgi nucleotide sugar transporter 4	PF08449	PTHR11132	KOG1444			GO:0055085	AT5G19980.1	GONST4
Gorai.009G022400	1	1	pleiotropic drug resistance 4	PF01061,PF08370,PF00005	PTHR19241,PTHR19241:SF10	KOG0065			GO:0005524,GO:0016887,GO:0016020	AT2G26910.1	ATPDR4,PDR4
Gorai.009G023300	1	1	Protein of unknown function, DUF538	PF04398						AT5G19590.1
Gorai.009G023500	1	1	NSP (nuclear shuttle protein)-interacting GTPase	PF01412	PTHR23180,PTHR23180:SF87	KOG0702			GO:0008060,GO:0008270,GO:0032312	AT4G13350.1	NIG
Gorai.009G025200	1	1	SITE-1 protease	PF00082	PTHR10795,PTHR10795:SF30	KOG4266	3.4.21.112	K08653	GO:0004252,GO:0006508	AT5G19660.1	ATS1P,ATSBT6.1,S1P
Gorai.009G025700	1	1	Protein of unknown function (DUF502)	PF04367						AT2G20120.1	COV1
Gorai.009G027100	1	1	Exostosin family protein	PF03016	PTHR11062,PTHR11062:SF37	KOG1021			GO:0016020	AT5G37000.1
Gorai.009G027500	1	1	Nucleotide-diphospho-sugar transferases superfamily protein	PF00535	PTHR12726	KOG2547				AT2G19880.2
Gorai.009G027800	1	1	MATE efflux family protein	PF01554	PTHR11206:SF38,PTHR11206	KOG1347			GO:0015238,GO:0015297,GO:0006855,GO:0055085,GO:0016020	AT4G29140.1
Gorai.009G028600	1	1	Protein of unknown function (DUF1005)	PF06219						AT4G29310.1
Gorai.009G029900	1	1	Ribosomal protein L31e family protein	PF01198	PTHR10956	KOG0893		K02910	GO:0003735,GO:0006412,GO:0005622,GO:0005840	AT2G19740.1
Gorai.009G030300	1	1	phospholipase A2-beta	PF00068	PTHR11716,PTHR11716:SF34				GO:0004623,GO:0005509,GO:0016042	AT2G19690.1	PLA2-BETA
Gorai.009G030400	1	1	Mitochondrial ATP synthase subunit G protein	PF04718	PTHR12386,PTHR12386:SF7		3.6.3.14	K02140	GO:0015078,GO:0015986,GO:0000276	AT4G26210.1
Gorai.009G030800	1	1	Mitochondrial substrate carrier family protein	PF00153	PTHR24089:SF104,PTHR24089	KOG0752				AT4G26180.1
Gorai.009G031800	1	1	alpha/beta-Hydrolases superfamily protein	PF08840	PTHR10992,PTHR10992:SF234	KOG4667		K06889		AT3G47590.1
Gorai.009G032000	1	1	nucleosome assembly protein 1;2	PF00956	PTHR11875,PTHR11875:SF7	KOG1507			GO:0006334,GO:0005634	AT2G19480.3	NAP1;2,NFA02,NFA2
Gorai.009G032200	1	1	CCCH-type zinc finger family protein	PF00642	PTHR13119,PTHR13119:SF4				GO:0003676,GO:0008270	AT5G56930.1	emb1789
Gorai.009G032900	1	1	Lycopene beta/epsilon cyclase protein	PF05834	PTHR10617:SF33,PTHR10617		1.14.-.-	K06444	GO:0016705,GO:0016117	AT5G57030.1	LUT2
Gorai.009G034500	1	1	BREVIS RADIX-like 4	PF08381	PTHR22870:SF36,PTHR22870					AT5G20540.1	ATBRXL4,BRX-LIKE4,BRXL4
Gorai.009G034700	1	1	Ribosomal protein S3 family protein	PF00189,PF07650	PTHR11760	KOG3181		K02985	GO:0003735,GO:0006412,GO:0005622,GO:0005840,GO:0003723	AT5G35530.1
Gorai.009G035000	1	1	cytochrome P450, family 72, subfamily A, polypeptide 15	PF00067	PTHR24282:SF174,PTHR24282	KOG0157			GO:0005506,GO:0009055,GO:0016705,GO:0020037,GO:0055114	AT3G14690.1	CYP72A15
Gorai.009G035100	1	1	RNA polymerase III RPC4	PF05132	PTHR13408	KOG3122			GO:0003677,GO:0003899,GO:0006383,GO:0005666	AT5G09380.1
Gorai.009G035200	1	1	growth-regulating factor 5	PF08879,PF08880					GO:0005515,GO:0005524,GO:0016818,GO:0006355,GO:0005634	AT3G13960.1	AtGRF5,GRF5
Gorai.009G037200	1	1
Gorai.009G037300	1	1	Plant invertase/pectin methylesterase inhibitor superfamily protein	PF04043	PTHR22931:SF14,PTHR22931				GO:0004857,GO:0030599	AT5G20740.1
Gorai.009G037400	1	1								AT5G20790.1
Gorai.009G038100	1	1	eukaryotic translation initiation factor 3K	PF03399	PTHR13022	KOG3252			GO:0006413,GO:0005634,GO:0003743	AT4G33250.1	ATTIF3K1,EIF3K,TIF3K1
Gorai.009G039800	1	1	BRCT domain-containing DNA repair protein	PF00533	PTHR13561:SF20,PTHR13561				GO:0005622	AT3G43930.1
Gorai.009G042200	1	1	S-adenosyl-L-methionine-dependent methyltransferases superfamily protein	PF01189	PTHR22807:SF4,PTHR22807	KOG2360				AT5G26180.1
Gorai.009G042600	1	1	homology to ABI1	PF00481	PTHR13832,PTHR13832:SF115	KOG0698			GO:0003824	AT1G72770.1	HAB1
Gorai.009G042700	1	1	AGC (cAMP-dependent, cGMP-dependent and protein kinase C) kinase family protein	PF00433,PF00069	PTHR24358:SF32,PTHR24358	KOG0605			GO:0004672,GO:0005524,GO:0006468,GO:0004674	AT4G33080.1
Gorai.009G044600	1	1	Fatty acid/sphingolipid desaturase	PF00173,PF00487	PTHR19353	KOG4232			GO:0020037,GO:0006629,GO:0055114,GO:0016491	AT2G46210.1
Gorai.009G046700	1	1		PF10258	PTHR13135	KOG3948				AT3G20430.1
Gorai.009G049400	1	1								AT5G11630.1
Gorai.009G050900	1	1	La protein 1	PF08777,PF00076,PF05383	PTHR22792,PTHR22792:SF4	KOG4213		K11090	GO:0003676	AT4G32720.2	AtLa1,La1
Gorai.009G051100	1	1	RNA polymerase I-associated factor PAF67	PF10255	PTHR13242	KOG3677				AT5G25754.1
Gorai.009G051800	1	1	rhomboid-like protein 11	PF01694	PTHR22936				GO:0004252,GO:0016021,GO:0006508	AT5G25752.1	ATRBL11,RBL11
Gorai.009G051900	1	1	Zinc-binding ribosomal protein family protein	PF01907	PTHR10768	KOG3475		K02922	GO:0003735,GO:0006412,GO:0005622,GO:0005840	AT1G15250.1
Gorai.009G053600	1	1	Ribosomal protein L39 family protein	PF00832	PTHR19970	KOG0002		K02924	GO:0003735,GO:0006412,GO:0005622,GO:0005840	AT4G31985.1
Gorai.009G053700	1	1	Domain of unknown function (DUF298)	PF03556	PTHR12281					AT1G15860.1
Gorai.009G055000	1	1	Ribosomal protein L7Ae/L30e/S12e/Gadd45 family protein	PF01248	PTHR11843	KOG3406		K02951	GO:0006412,GO:0005840,GO:0005622,GO:0003735	AT2G32060.1
Gorai.009G055800	1	1	Leucine-rich repeat protein kinase family protein	PF07714,PF00560	PTHR24420,PTHR24420:SF73	KOG1187			GO:0004672,GO:0005524,GO:0006468,GO:0005515	AT2G24230.1
Gorai.009G057100	1	1	DNA glycosylase superfamily protein	PF03352					GO:0008725,GO:0006284	AT5G57970.1
Gorai.009G058300	1	1	S-domain-2 5	PF00069,PF01453	PTHR24420,PTHR24420:SF926	KOG1187			GO:0004672,GO:0005524,GO:0006468,GO:0005529	AT4G32300.1	SD2-5
Gorai.009G058400	1	1								AT4G32295.1
Gorai.009G060800	1	1	Mitochondrial glycoprotein family protein	PF02330	PTHR10826,PTHR10826:SF1	KOG2536			GO:0005759	AT4G31930.1
Gorai.009G061400	1	1	ARM repeat superfamily protein		PTHR23315:SF38,PTHR23315					AT4G31890.1
Gorai.009G062500	1	1	Actin-binding FH2 (Formin Homology) protein	PF10409,PF02181	PTHR23213,PTHR23213:SF18				GO:0005515	AT2G25050.1
Gorai.009G064100	1	1	dynamin-related protein 3A	PF01031,PF00350,PF02212	PTHR11566:SF12,PTHR11566	KOG0446			GO:0003924,GO:0005525	AT4G33650.2	ADL2,DRP3A
Gorai.009G064500	1	1	EamA-like transporter family	PF00892	PTHR23051	KOG2765			GO:0016020	AT4G32140.1
Gorai.009G064600	1	1		PF06417	PTHR19315:SF4,PTHR19315	KOG3318				AT5G10780.1
Gorai.009G065200	1	1	Protein of unknown function (DUF1336)	PF07059						AT5G10750.1
Gorai.009G066500	1	1	Cellulose-synthase-like C5	PF00535	PTHR10587,PTHR10587:SF18					AT4G31590.1	ATCSLC05,ATCSLC5,CSLC05,CSLC5
Gorai.009G069600	1	1	N-terminal nucleophile aminohydrolases (Ntn hydrolases) superfamily protein	PF00227	PTHR11599,PTHR11599:SF4	KOG0174			GO:0004298,GO:0051603,GO:0005839	AT4G31300.1	PBA1
Gorai.009G073800	1	1	ABC-2 type transporter family protein	PF01061,PF00005	PTHR19241,PTHR19241:SF20	KOG0061			GO:0005524,GO:0016887,GO:0016020	AT3G21090.1
Gorai.009G074300	1	1	titan9							AT3G20070.1	TTN9
Gorai.009G076000	1	1	Glutathione S-transferase, C-terminal-like;Translation elongation factor EF1B/ribosomal protein S6	PF00736	PTHR11595,PTHR11595:SF5	KOG1668			GO:0003746,GO:0006414,GO:0005853	AT5G12110.1
Gorai.009G076300	1	1	20S proteasome alpha subunit G1	PF00227,PF10584	PTHR11599,PTHR11599:SF10	KOG0184			GO:0004298,GO:0051603,GO:0005839,GO:0004175,GO:0006511,GO:0019773	AT2G27020.1	PAG1
Gorai.009G077800	1	1								AT2G26840.1
Gorai.009G078900	1	1	RNAligase	PF08302					GO:0003972,GO:0005524,GO:0006388	AT1G07910.1	ATRNL,RNL
Gorai.009G080200	1	1	RNA methyltransferase family protein	PF05175	PTHR18895:SF7,PTHR18895	KOG2904			GO:0008168,GO:0008276,GO:0006479,GO:0005737	AT5G64150.1
Gorai.009G082100	1	1	IQ-domain 5	PF00612	PTHR10699:SF9,PTHR10699				GO:0005515	AT3G22190.1	IQD5
Gorai.009G082800	1	1	transcription factor-related		PTHR13902,PTHR13902:SF5					AT2G27230.1	LHW
Gorai.009G082900	1	1	NIMA (never in mitosis, gene A)-related 6	PF00069	PTHR24362,PTHR24362:SF158	KOG0589	2.7.11.1	K08857	GO:0004672,GO:0005524,GO:0006468	AT3G44200.1	ATNEK6,IBO1,NEK6
Gorai.009G083200	1	1	Eukaryotic aspartyl protease family protein	PF00026	PTHR13683,PTHR13683:SF98	KOG1339			GO:0004190,GO:0006508	AT3G52500.1
Gorai.009G083900	1	1	P-loop containing nucleoside triphosphate hydrolases superfamily protein	PF06068	PTHR11093	KOG1942		K04499	GO:0005524,GO:0009378,GO:0006281,GO:0006310,GO:0003678	AT5G22330.1	ATTIP49A,RIN1
Gorai.009G084200	1	1	Pollen Ole e 1 allergen and extensin family protein	PF01190						AT2G27385.1
Gorai.009G085600	1	1	Ribosomal protein L1p/L10e family	PF00687	PTHR23105:SF4,PTHR23105	KOG1570		K02865	GO:0003723,GO:0003735,GO:0006412,GO:0015934	AT5G22440.1
Gorai.009G086100	1	1
Gorai.009G086600	1	1	S-adenosyl-L-methionine-dependent methyltransferases superfamily protein							AT2G27590.1
Gorai.009G087300	1	1	60S acidic ribosomal protein family	PF00428	PTHR21141	KOG3449		K02943	GO:0003735,GO:0006414,GO:0005622,GO:0005840	AT3G44590.1
Gorai.009G088100	1	1								AT2G27775.1
Gorai.009G088600	1	1	histone deacetylase 3							AT3G44750.1	ATHD2A,HD2A,HDA3,HDT1
Gorai.009G089500	1	1	Late embryogenesis abundant (LEA) hydroxyproline-rich glycoprotein family	PF03168						AT5G22870.1
Gorai.009G092000	1	1	RING/U-box superfamily protein		PTHR12183	KOG4172				AT5G01450.1
Gorai.009G094700	1	1	Tim10/DDP family zinc finger protein	PF02953	PTHR11038:SF12,PTHR11038	KOG3480			GO:0006626,GO:0045039,GO:0042719	AT2G29530.1	TIM10
Gorai.009G096900	1	1	translocon at the outer envelope membrane of chloroplasts 75-III	PF07244,PF01103	PTHR12815,PTHR12815:SF6				GO:0019867	AT3G46740.1	MAR1,TOC75-III
Gorai.009G097800	1	1	protein C-terminal S-isoprenylcysteine carboxyl O-methyltransferases	PF04140		KOG2628			GO:0004671,GO:0006481,GO:0016021	AT5G59500.1
Gorai.009G099100	1	1	triosephosphate isomerase	PF00121	PTHR21139	KOG1643	5.3.1.1	K01803	GO:0004807,GO:0008152	AT3G55440.1	ATCTIMC,CYTOTPI,TPI
Gorai.009G099200	1	1	methyl-CPG-binding domain protein 5	PF01429	PTHR12396				GO:0003677,GO:0005634	AT3G46580.1	ATMBD5,MBD05,MBD5
Gorai.009G102300	1	1	3-ketoacyl-CoA synthase 12	PF08392,PF08541					GO:0016746,GO:0016747,GO:0006633,GO:0016020,GO:0008610,GO:0004315	AT2G28630.1	KCS12
Gorai.009G102400	1	1	nudix hydrolase homolog 9	PF00293					GO:0016787	AT3G46200.1	aTNUDT9,NUDT9
Gorai.009G103000	1	1	Polymerase/histidinol phosphatase-like	PF01876	PTHR13031	KOG2363	3.1.26.5	K03539	GO:0004540,GO:0008033	AT5G59980.2
Gorai.009G103300	1	1	P-loop containing nucleoside triphosphate hydrolases superfamily protein	PF00225	PTHR24115:SF152,PTHR24115	KOG0243			GO:0003777,GO:0005524,GO:0007018	AT3G45850.1
Gorai.009G104500	1	1	ascorbate peroxidase 1	PF00141					GO:0004601,GO:0020037,GO:0006979,GO:0055114	AT1G07890.1	APX1,ATAPX01,ATAPX1,CS1,MEE6
Gorai.009G106100	1	1	Transducin/WD40 repeat-like superfamily protein	PF00400	PTHR19877	KOG0643		K03246	GO:0005515	AT2G46290.1
Gorai.009G106500	1	1	hydroxyproline-rich glycoprotein family protein							AT3G45230.1
Gorai.009G106700	1	1	PHF5-like protein	PF03660	PTHR13120	KOG1705		K12834		AT2G30000.1
Gorai.009G107900	1	1	GATA transcription factor 10	PF00320	PTHR10071:SF113,PTHR10071				GO:0003700,GO:0008270,GO:0043565,GO:0006355	AT1G08000.1	GATA10
Gorai.009G108700	1	1	Protein kinase superfamily protein	PF00069	PTHR24420:SF809,PTHR24420	KOG1187			GO:0004672,GO:0005524,GO:0006468	AT2G28250.1	NCRK
Gorai.009G109800	1	1	P-loop containing nucleoside triphosphate hydrolases superfamily protein	PF02374	PTHR10803	KOG2825				AT3G10350.1
Gorai.009G110400	1	1								AT3G45050.1
Gorai.009G110500	1	1
Gorai.009G111700	1	1	Pleckstrin homology (PH) domain superfamily protein	PF00638	PTHR23138,PTHR23138:SF10	KOG0864			GO:0046907	AT2G30060.1
Gorai.009G116000	1	1	LSD1 zinc finger family protein	PF06943						AT4G20380.2	LSD1
Gorai.009G118300	1	1	autoinhibited Ca(2+)-ATPase 9	PF00689,PF12515,PF00702,PF00690,PF00122	PTHR24093,PTHR24093:SF73	KOG0204	3.6.3.8	K01537	GO:0000166,GO:0046872,GO:0003824,GO:0008152,GO:0005516,GO:0016020,GO:0015662,GO:0006812,GO:0006754	AT3G21180.1	ACA9,ATACA9
Gorai.009G118600	1	1	proton gradient regulation 7	PF10615						AT3G21200.1	PGR7
Gorai.009G118800	1	1	Pyridoxamine 5\'-phosphate oxidase family protein	PF01243	PTHR13343:SF4,PTHR13343	KOG3374			GO:0004733,GO:0010181,GO:0055114	AT1G51560.1
Gorai.009G119300	1	1	vacuolar ATP synthase subunit A	PF00006,PF02874,PF00306	PTHR15184:SF7,PTHR15184	KOG1352	3.6.3.14	K02145	GO:0005524,GO:0016820,GO:0015991,GO:0033178,GO:0046933,GO:0046961,GO:0015992,GO:0046034,GO:0016469	AT1G78900.1	VHA-A
Gorai.009G119700	1	1	Tyrosyl-tRNA synthetase, class Ib, bacterial/mitochondrial	PF00579	PTHR11946,PTHR11946:SF34	KOG2144	6.1.1.1	K01866	GO:0000166,GO:0004812,GO:0005524,GO:0006418,GO:0005737,GO:0006412	AT2G33840.1
Gorai.009G121800	1	1								AT1G16080.1
Gorai.009G123600	1	1	LOB domain-containing protein 24	PF03195						AT3G26660.1	LBD24
Gorai.009G124700	1	1	Mitochondrial glycoprotein family protein	PF02330	PTHR10826,PTHR10826:SF1	KOG2536			GO:0005759	AT1G15870.1
Gorai.009G124800	1	1	PPPDE putative thiol peptidase family protein	PF05903	PTHR12378	KOG0324				AT1G80690.1
Gorai.009G127900	1	1	Leucine-rich repeat (LRR) family protein	PF00560	PTHR24420				GO:0005515	AT1G80080.1	AtRLP17,TMM
Gorai.009G128400	1	1	fatty acid desaturase 5	PF00487	PTHR11351:SF2,PTHR11351	KOG1600	1.14.19.1	K00507	GO:0006629,GO:0055114,GO:0016491	AT3G15850.1	ADS3,FAD5,FADB,JB67
Gorai.009G129900	1	1		PF04003,PF00400	PTHR22847,PTHR22847:SF201	KOG4547			GO:0005515	AT1G15420.1
Gorai.009G130600	1	1	Peptidase S24/S26A/S26B/S26C family protein	PF00717	PTHR10806	KOG3342	3.4.-.-	K13280	GO:0016020,GO:0008233,GO:0006465	AT1G52600.1
Gorai.009G130700	1	1	Embryo-specific protein 3, (ATS3)	PF06232						AT5G62200.1
Gorai.009G131100	1	1	HSP20-like chaperones superfamily protein	PF00011	PTHR11527,PTHR11527:SF16	KOG0710				AT1G52560.1
Gorai.009G132700	1	1	CASC3/Barentsz eIF4AIII binding	PF09405						AT1G80000.1
Gorai.009G133200	1	1	Protein of unknown function (DUF581)	PF04570						AT2G25690.1
Gorai.009G133800	1	1
Gorai.009G134500	1	1	PDI-like 1-6	PF00085	PTHR18929,PTHR18929:SF32	KOG0190			GO:0045454,GO:0005509	AT3G16110.1	ATPDI4,ATPDIL1-6,PDI4,PDIL1-6
Gorai.009G135100	1	1	HD-ZIP IV family of homeobox-leucine zipper protein with lipid-binding START domain	PF01852,PF00046	PTHR24325:SF193,PTHR24325	KOG0483		K09338	GO:0003700,GO:0043565,GO:0006355	AT1G79840.1	GL2
Gorai.009G135300	1	1	Major facilitator superfamily protein	PF00083	PTHR24063,PTHR24063:SF84	KOG0254			GO:0022857,GO:0055085,GO:0016021	AT1G79820.1	SGB1
Gorai.009G135400	1	1	cytochrome c biogenesis protein family	PF03918						AT1G15220.1	ATCCMH,CCMH
Gorai.009G136000	1	1								AT3G16200.1
Gorai.009G138300	1	1	myo-inositol oxygenase 1	PF05153	PTHR12588	KOG1573	1.13.99.1	K00469	GO:0005506,GO:0050113,GO:0019310,GO:0055114,GO:0005737	AT1G14520.1	MIOX1
Gorai.009G141000	1	none	HXXXD-type acyl-transferase family protein	PF02458					GO:0016747	AT3G50280.1
Gorai.009G141700	1	1	heat shock protein 60-3A	PF00118	PTHR11353:SF9,PTHR11353	KOG0356			GO:0005524,GO:0044267	AT3G13860.1	HSP60-3A
Gorai.009G142000	1	1	Glucose-methanol-choline (GMC) oxidoreductase family protein	PF05199,PF00732	PTHR11552:SF31,PTHR11552	KOG1238			GO:0016614,GO:0050660,GO:0055114	AT1G72970.1	EDA17,HTH
Gorai.009G143100	1	1	Dihydrolipoamide acetyltransferase, long form protein	PF00364,PF00198,PF02817	PTHR23151	KOG0557			GO:0016746,GO:0008152,GO:0008415	AT3G13930.1
Gorai.009G143200	1	1	translocase of inner mitochondrial membrane 23	PF02466	PTHR15371	KOG3324			GO:0015031,GO:0008565,GO:0005743	AT1G17530.1	ATTIM23-1,TIM23-1
Gorai.009G145000	1	1	Synaptobrevin family protein	PF00957	PTHR21136,PTHR21136:SF4	KOG0862			GO:0016192,GO:0016021	AT1G11890.1	ATSEC22,SEC22
Gorai.009G146600	1	1	ELF4-like 4	PF07011						AT1G17455.1	ELF4-L4
Gorai.009G147400	1	1	Subtilase family protein	PF05922,PF00082,PF02225	PTHR10795,PTHR10795:SF17				GO:0004252,GO:0006508,GO:0042802,GO:0043086	AT3G14240.1
Gorai.009G147900	1	1	pectin methylesterase 3	PF01095,PF04043	PTHR22931,PTHR22931:SF5		3.1.1.11	K01051	GO:0030599,GO:0042545,GO:0005618,GO:0004857	AT3G14310.1	ATPME3,PME3
Gorai.009G148000	1	1	pumilio 23	PF00806	PTHR13102				GO:0003723	AT1G72320.1	APUM23,PUM23
Gorai.009G149800	1	1	photosystem I subunit F	PF02507				K02694	GO:0015979,GO:0009522,GO:0009538	AT1G31330.1	PSAF
Gorai.009G150000	1	1	Homeodomain-like superfamily protein							AT2G35640.1
Gorai.009G150200	1	1	TRAM, LAG1 and CLN8 (TLC) lipid-sensing domain containing protein	PF03798	PTHR13439	KOG4561			GO:0016021	AT1G31300.1
Gorai.009G151300	1	1	myo-inositol monophosphatase like 1	PF00459	PTHR20854:SF10,PTHR20854	KOG2951			GO:0046854,GO:0004437	AT1G31190.1	IMPL1
Gorai.009G152300	1	1	N-terminal nucleophile aminohydrolases (Ntn hydrolases) superfamily protein	PF00227,PF10584	PTHR11599,PTHR11599:SF16	KOG0181	3.4.25.1	K02726	GO:0004298,GO:0051603,GO:0005839,GO:0004175,GO:0006511,GO:0019773	AT1G79210.1
Gorai.009G153000	1	1	RNA helicase 1	PF00271,PF00270	PTHR24031,PTHR24031:SF18	KOG0350			GO:0003676,GO:0005524,GO:0008026,GO:0004386,GO:0003677,GO:0016787	AT4G15850.1	ATRH1,RH1
Gorai.009G153900	1	1	TEOSINTE BRANCHED 1, cycloidea and PCF transcription factor 2	PF03634						AT4G18390.1	TCP2
Gorai.009G155900	1	1	Ribosomal protein L18ae/LX family protein	PF01775	PTHR10052	KOG0829		K02882	GO:0003735,GO:0006412,GO:0005840	AT2G34480.1
Gorai.009G156400	1	1	3-ketoacyl-acyl carrier protein synthase I	PF00109,PF02801	PTHR11712:SF52,PTHR11712	KOG1394			GO:0009058,GO:0003824	AT5G46290.1	KAS I,KAS1
Gorai.009G158000	1	1	Ribosomal protein L32e	PF01655	PTHR23413	KOG0878		K02912	GO:0003735,GO:0006412,GO:0005622,GO:0005840	AT4G18100.1
Gorai.009G159200	1	1	GDSL-like Lipase/Acylhydrolase superfamily protein	PF00657	PTHR22835,PTHR22835:SF39				GO:0016788,GO:0006629	AT1G29670.1
Gorai.009G160700	1	1	RAB GTPase homolog A1C	PF00071	PTHR24073,PTHR24073:SF213	KOG0087		K07976	GO:0003924,GO:0005525,GO:0007264,GO:0005622	AT5G45750.1	AtRABA1c,RABA1c
Gorai.009G161000	1	1
Gorai.009G161300	1	1	ribosomal protein L16B	PF00673,PF00281	PTHR11994	KOG0397			GO:0003735,GO:0006412,GO:0005622,GO:0005840	AT4G18730.1	RPL16B
Gorai.009G165900	1	1	Optic atrophy 3 protein (OPA3)	PF07047	PTHR12499	KOG3335				AT1G28510.1
Gorai.009G166800	1	1	alpha-glucan phosphorylase 2	PF00343	PTHR11468	KOG2099	2.4.1.1	K00688	GO:0004645,GO:0005975	AT3G46970.1	ATPHS2,PHS2
Gorai.009G167000	1	1								AT1G28400.1
Gorai.009G167100	1	1
Gorai.009G167400	1	1	Mitochondrial substrate carrier family protein	PF00153	PTHR24089:SF54,PTHR24089	KOG0758				AT2G33820.1	ATMBAC1,MBAC1
Gorai.009G167800	1	1	Citrate synthase family protein	PF00285	PTHR11739	KOG2617	2.3.3.1	K01647	GO:0046912,GO:0044262	AT2G44350.1	ATCS,CSY4
Gorai.009G170400	1	1	disease resistance protein (TIR class), putative							AT1G61100.2
Gorai.009G170600	1	1	alpha-galactosidase 2	PF02065	PTHR11452	KOG2366			GO:0004553,GO:0005975	AT5G08370.1	AGAL2,AtAGAL2
Gorai.009G171400	1	1								AT1G11120.2
Gorai.009G171500	1	1								AT1G11125.1
Gorai.009G173700	1	1	riboflavin kinase/FMN hydrolase	PF01687,PF00702	PTHR22749	KOG3110	2.7.1.26	K00861	GO:0003824,GO:0008152,GO:0008531,GO:0009231	AT4G21470.1	ATFMN/FHY,FMN/FHY
Gorai.009G175800	1	1	kinesin 1	PF00225	PTHR24115,PTHR24115:SF170	KOG0239		K10405	GO:0003777,GO:0005524,GO:0007018	AT4G21270.1	ATK1,KATA,KATAP
Gorai.009G177100	1	1	tobamovirus multiplication 1	PF06454						AT4G21790.1	ATTOM1,TOM1
Gorai.009G177800	1	1	AT hook motif-containing protein							AT5G52890.2
Gorai.009G179400	1	1	O-Glycosyl hydrolases family 17 protein	PF00332,PF07983	PTHR16631:SF1,PTHR16631				GO:0004553,GO:0005975	AT1G11820.2
Gorai.009G179800	1	1		PF08640	PTHR23271:SF1,PTHR23271	KOG2396		K14557		AT4G28200.1
Gorai.009G181300	1	1	PHD finger family protein / bromo-adjacent homology (BAH) domain-containing protein	PF01426	PTHR12505:SF8,PTHR12505				GO:0003677	AT4G22140.2	EBS
Gorai.009G181400	1	1	Ribosomal protein L4/L1 family	PF00573	PTHR10746	KOG1624		K02926	GO:0003735,GO:0006412,GO:0005840	AT2G20060.1
Gorai.009G182800	1	1	uclacyanin 1	PF02298					GO:0005507,GO:0009055	AT2G32300.1	UCC1
Gorai.009G184000	1	1		PF01746	PTHR13563,PTHR13563:SF6	KOG2967				AT5G47680.1
Gorai.009G184900	1	1	farnesyl diphosphate synthase 1	PF00348	PTHR11525	KOG0711	2.5.1.1,2.5.1.10	K00787	GO:0008299	AT5G47770.1	FPS1
Gorai.009G187500	1	1	Plant regulator RWP-RK family protein	PF02042,PF00564					GO:0005515	AT1G76350.1
Gorai.009G188100	1	1	Zn-dependent exopeptidases superfamily protein	PF00246	PTHR11705:SF3,PTHR11705	KOG2650			GO:0004181,GO:0008270,GO:0006508	AT5G42320.1
Gorai.009G188200	1	1								AT1G42430.1
Gorai.009G188400	1	1	Arabidopsis protein of unknown function (DUF241)	PF03087						AT1G76240.1
Gorai.009G188800	1	1	LSD1-like 1	PF04433,PF01593	PTHR10742:SF30,PTHR10742	KOG0029	1.-.-.-	K11450	GO:0016491,GO:0055114,GO:0005515	AT1G62830.1	ATLSD1,ATSWP1,LDL1,LSD1,SWP1
Gorai.009G190000	1	1	TCP-1/cpn60 chaperonin family protein	PF00118	PTHR11353:SF23,PTHR11353	KOG0363		K09494	GO:0005524,GO:0044267,GO:0051082,GO:0006457	AT5G20890.1
Gorai.009G193000	1	1	Glutathione S-transferase family protein	PF00462	PTHR12782	KOG3029			GO:0009055,GO:0015035,GO:0045454	AT5G42150.1
Gorai.009G193100	1	1								AT2G17787.1
Gorai.009G195100	1	1	eukaryotic initiation factor 3 gamma subunit family protein	PF04189	PTHR12945	KOG1416		K03256	GO:0003743,GO:0006413	AT2G45730.1
Gorai.009G198100	1	1	beta-galactosidase 5	PF01301	PTHR23421,PTHR23421:SF2	KOG0496			GO:0004553,GO:0005975,GO:0004565,GO:0009341	AT1G45130.1	BGAL5
Gorai.009G200500	1	1	Glycosyl hydrolase superfamily protein	PF00150					GO:0004553,GO:0005975	AT5G66460.1
Gorai.009G203100	1	1	DUTP-PYROPHOSPHATASE-LIKE 1	PF00692	PTHR11241	KOG3370	3.6.1.23	K01520	GO:0016787,GO:0046080	AT3G46940.1	DUT1
Gorai.009G214200	1	1	WUSCHEL related homeobox 4	PF00046					GO:0003700,GO:0043565,GO:0006355	AT1G46480.1	WOX4
Gorai.009G214400	1	1	SPla/RYanodine receptor (SPRY) domain-containing protein	PF00622					GO:0005515	AT4G06536.1
Gorai.009G214600	1	1	P-loop containing nucleoside triphosphate hydrolases superfamily protein	PF00225	PTHR24115,PTHR24115:SF174	KOG0244		K10395	GO:0003777,GO:0005524,GO:0007018	AT5G47820.1	FRA1
Gorai.009G217900	1	1	ankyrin repeat family protein	PF00023	PTHR15047	KOG1709			GO:0005515	AT5G65860.2
[truncated: 33,684 more rows]
