# Supplementary material for: Domestication over Speciation in Allopolyploid Cotton Species: A Stronger Transcriptomic Pull
Source: Genes (Basel). 2023 Jun 20;14(6):1301. doi: 10.3390/genes14061301 (PMC10298526; doi:10.3390/genes14061301)
Supplement: Supplementary file 1 [file genes-14-01301-s001.zip › Supplementary Table S7.xlsx]

## Sheet: 工作表1
Supplementary Table S7. Distribution of known functional genes in coexpression networks; module numbers are given. Meta refers to the combined metanetwork, AD1 refers to the species-specific G. hirsutum network, and AD2 refers to the G. barbadense network.
Gene ID	Gene name	Meta	AD1	AD2	Reference
Gorai.001G195600.A	Zinc Finger Gene	34	1	2	Razzaq et al. (2021)
Gorai.002G073100.D	GhWD40	25	2	7	Tian et al. (2020)
Gorai.005G134100.D	GhWBC1	1	2	1	Zhu et al. (2003)
Gorai.008G216800.A	GhVIN1	1	2	1	Wang et al. (2010c, 2014)
Gorai.013G270900.D	GhUGT87A2	0	0	14	Patel et al. (2020)
Gorai.013G271000.D	GhUGT87A1-D1a	6	1	1	Patel et al. (2020)
Gorai.011G155800.D	GhttG2	0	29	1	Humphries et al. (2005)
Gorai.004G125200.D	GhTTG1	1	5	2	John et al. 2005
Gorai.009G373000.A	GhTCP4	29	2	18	Cao et al. (2020)
Gorai.004G142700.A	GhSusA1	18	13	3	Jiang et al. (2012)
Gorai.009G268600.D	GhSMT2–1	1	5	5	Niu et al. (2019)
Gorai.009G052200.D	GhRDL1	1	11	1	Xu et al. (2013a)
Gorai.008G036100.A	GhRac1	4	17	6	Kim and Triplett (2004)
Gorai.003G088700.A	GhPOX1	16	11	4	Mei et al. (2009)
Gorai.009G182800.A	GhPIP2	1	2	17	Li et al, (2013)
Gorai.012G056200.A	GhPIN8_At	3	1	8	Zhang et al. (2017b)
Gorai.005G082500.A	GhPIN6	4	4	40	Zhang et al. (2017b)
Gorai.002G179000.D	GhPIN3a	8	2	4	Zeng et al. (2019)
Gorai.007G352200.D	GhPIN1c	8	8	0	Zhang et al. (2016)
Gorai.003G108300.D	GhPEL	1	2	1	Wang et al. (2010a)
Gorai.007G267700.D	GhNAC100-2	15	2	4	Zhang et al.(2022)
Gorai.008G126700.A	GhMYB5_A12	9	3	2	Wang et al. (2021)
Gorai.007G350500.D	GhMYB212	15	11	4	Sun et al . (2018)
Gorai.012G061800.A	GhMYB109	1	2	1	Pu et al. (2008) and Suo et al. (2003)
Gorai.013G139200.A	GhMYB1	3	4	19	Yadav et al. (2017)
Gorai.008G179800.D	GhMML4_D12	3	2	5	Wu et al. (2018)
Gorai.007G246400.D	GhMAH1	6	4	3	Ma et al. (2022)
Gorai.012G176200.A	GhLTPG1	1	5	1	Deng et al.(2016)
Gorai.007G211800.D	GhKRP6	3	4	4	Sun et al.(2017)
Gorai.004G206600.D	GhKNL1	3	1	3	Gong et al. (2014)
Gorai.010G090600.D	GhJAZ2	3	9	3	Hu et al. (2016)
Gorai.008G293300.D	GhHOX3	1	5	5	Shan et al. (2014)
Gorai.010G177800.A	GhHD1	1	2	5	Walford et al. (2012)
Gorai.008G007200.A	GhGID1a	6	1	3	Aleman et al. (2008)
Gorai.009G368400.A	GhGalT1	37	5	2	Qin et al.(2016)
Gorai.008G130300.A	GhFSN1(NAC)	3	1	3	Zhang et al. (2018)
Gorai.008G155400.A	GhFLA9	3	1	3	Song et al.（2021）
Gorai.006G119900.D	GhFLA1	3	1	4	Huang et al. (2013a)
Gorai.007G159700.D	GhFIM2	1	2	1	Zhang et al. (2017a)
Gorai.008G062900.A	GhF3H	1	8	1	Tan et al. (2013)
Gorai.012G111500.A	GhDET2	1	2	5	Luo et al.(2007)
Gorai.004G212200.D	GhDEL65	9	15	5	Shangguan et al. (2016)
Gorai.007G023500.D	GhDEL61	0	3	20	Shangguan et al. (2016)
Gorai.007G121600.D	GhD27	0	2	23	Zhang et al.(2022)
Gorai.010G215400.D	GhCYS6	45	1	4	Liu et al.(2020)
Gorai.011G228500.D	GhCPK1	1	11	1	Huang et al. (2008)
Gorai.009G172800.A	GhCFE1A	15	2	4	Lv et al. (2015)
Gorai.004G057400.A	GhcelA2	3	1	3	Pear et al. (1996)
Gorai.004G057400.D	GhcelA2	3	1	3	Pear et al. (1996)
Gorai.011G036300.A	GhBZR3	3	4	2	Shi et al. (2022)
Gorai.004G211800.A	Gh-BtubL	16	1	4	Ji et al. (2002)
Gorai.012G049200.D	GhbHLH18	1	5	5	Gao et al. (2018)
Gorai.007G044900.A	GhARF2b	5	3	7	Zhang et al.(2021)
Gorai.006G138900.A	GhAlaRP	5	1	1	Zhu et al.(2021)
Gorai.001G131200.A	GhAGP4	3	1	41	Li et al. (2010b)
Gorai.012G100700.D	GhACT_LI1	1	5	1	Thyssen et al. (2017)
Gorai.004G062100.D	GhACO3	3	4	4	Shi et al. (2006)
Gorai.010G184900.A	GhACO2	2	19	8	Shi et al. (2006)
Gorai.009G182300.D	GhACO1	2	1	3	Wei et al. (2022)
Gorai.001G224400.A	Gh_A07G1758	1	2	2	Sun et al.(2017)
Gorai.008G181600.D	GbTCP	15	8	4	Hao et al. (2012)
Gorai.012G041900.D	GbPDF1	1	2	1	Deng et al. (2012)
Gorai.009G035800.D	GbGLP2	15	11	56	Sun et al. (2020)
Gorai.001G205700.D	GbGAUT1	0	0	2	Sun et al.(2017)
Gorai.011G128500.A	GbEXPATR	4	2	22	Li et al. (2016)
Gorai.011G212900.D	GbAnx6	1	3	5	Huang et al. (2013c)
Gorai.004G196800.A	GaMYB2	1	2	1	Wang et al. (2004)
Gorai.009G135100.A	GaHOX1	1	14	1	Wang et al. 2004
Gorai.002G079100.A	Associated with Short fiber rate	14	11	1	Wang et al.(2017)
Gorai.001G225900.A	Associated with FS	2	4	16	Ma et al.(2018)
Gorai.002G079100.D	Associated with FL	1	2	1	Li et al.(2020)
Gorai.002G233700.D	Associated with FE	3	1	3	He et al.(2021)
Gorai.011G138800.A	GhFL1	1	14	2	Ma et al.(2018)
Gorai.003G049600.D	Associated with MV	1	2	1	Wang et al.(2017)
Gorai.004G061700.D	GhFLA7	3	1	3	Li et al.,(2020)
Gorai.004G101500.D	Associated with Short fiber rate	1	11	1	Wang et al.(2017)
Gorai.006G043300.A	Associated with FE	7	6	25	Li et al.(2020)
Gorai.007G212800.D	Associated with FL	0	2	18	Li et al.(2020)
Gorai.008G028300.A	Associated with Short fiber rate	3	1	11	Wang et al.(2017)
Gorai.008G035300.A	Associated with FS	1	2	1	Wang et al.(2017)
Gorai.008G035700.A	Associated with FS	3	1	3	Wang et al.(2017)
Gorai.008G156700.D	Associated with FU	4	20	1	Li et al.(2020)
Gorai.008G158500.D	Associated with FU	1	2	18	Li et al.(2020)
Gorai.009G288900.D	Associated with FL	0	1	2	Li et al.(2020)
Gorai.010G101200.A	Associated with Short fiber rate	3	49	0	Wang et al.(2017)
Gorai.010G175900.A	Associated with FL	9	17	7	Wang et al.(2017)
Gorai.011G142200.D	Associated with MV	1	2	1	Wang et al.(2017)
Gorai.012G137400.D	Associated with FE	4	1	1	Li et al.(2020)
Gorai.012G146300.D	Associated with FE	9	10	7	Li et al.(2020)
Gorai.012G147400.D	Associated with FE	3	1	3	Wang et al.(2017)
Gorai.012G148600.D	Associated with FE	1	2	1	Wang et al.(2017)
