# Supplementary material for: Domestication over Speciation in Allopolyploid Cotton Species: A Stronger Transcriptomic Pull
Source: Genes (Basel). 2023 Jun 20;14(6):1301. doi: 10.3390/genes14061301 (PMC10298526; doi:10.3390/genes14061301)
Supplement: Supplementary file 1 [file genes-14-01301-s001.zip › Supplementary Table S8.xlsx]

## Sheet: s3.module_annotation
Supplementary Table S8. Module placement and annotation of genes in the individual species networks (AD1_A:AD2_D) and the interspecifici consensus modules. Homoeologs for each species and the consensus network are paired (A: maternal, D: paternal). Homoeologs removed prior to network construction (due to lack of expression and/or expression variation) have "none" listed as their module for that n…
gene	AD1_A	AD1_D	AD2_A	AD2_D	consensus-A	consensus-D	tair10.defline	pfam	panther	kog	kegg.ec	kegg.orthology	go	tair10	tair10.symbol
Gorai.001G000100	4	6	25	46	0	91	S-adenosyl-L-methionine-dependent methyltransferases superfamily protein	PF08704	PTHR12133				GO:0016429,GO:0030488	AT5G14600.1
Gorai.001G000200	6	6	12	1	18	18	RNA 2\'-phosphotransferase, Tpt1 / KptA family							AT2G45330.1
Gorai.001G000300	24	6	1	18	1	74	RNA 2\'-phosphotransferase, Tpt1 / KptA family	PF01885	PTHR12684				GO:0016772,GO:0006388	AT2G45330.1
Gorai.001G000400	4	19	8	22	9	6	Core-2/I-branching beta-1,6-N-acetylglucosaminyltransferase family protein	PF02485					GO:0008375,GO:0016020	AT4G31350.1
Gorai.001G000500	10	67	2	2	0	162	ribonuclease P family protein / Rpp14 family protein	PF01900	PTHR10993,PTHR10993:SF1	KOG4639	3.1.26.5	K03537	GO:0004540,GO:0008033	AT1G04635.1
Gorai.001G000700	3	3	4	4	12	12
Gorai.001G000800	3	65	9	1	31	4	ChaC-like family protein	PF04752	PTHR12192	KOG3182				AT4G31290.1
Gorai.001G000900	2	2	2	4	1	10	cell division control 2	PF00069	PTHR24056,PTHR24056:SF109	KOG0594	2.7.11.22	K02087	GO:0004672,GO:0005524,GO:0006468	AT3G48750.1
Gorai.001G001000	4	3	0	1	34	3	mraW methylase family protein	PF01795	PTHR11265	KOG2782			GO:0008168	AT5G10910.1
Gorai.001G001100	5	6	5	10	3	3	SHK1 binding protein 1	PF05185	PTHR10738	KOG0822	2.1.1.125	K02516	GO:0008168,GO:0005737	AT4G31120.1
Gorai.001G001200	1	4	9	9	25	2	Protein kinase superfamily protein	PF07714	PTHR23257:SF82,PTHR23257	KOG0192			GO:0004672,GO:0005524,GO:0006468	AT4G31170.1
Gorai.001G001300	5	5	5	5	3	3	Class II aminoacyl-tRNA and biotin synthetases superfamily protein	PF00152	PTHR22594:SF10,PTHR22594	KOG0556	6.1.1.12	K01876	GO:0000166,GO:0004812,GO:0005524,GO:0006418,GO:0005737,GO:0006412	AT4G31180.1
Gorai.001G001400	10	10	2	6	26	9	Protein of unknown function (DUF1644)	PF07800						AT4G31410.1
Gorai.001G001500	6	1	1	6	86	5	Zinc finger protein 622	PF12171	PTHR13182	KOG2785				AT4G31420.1
Gorai.001G001600	4	4	6	0	9	84								AT4G31430.1
Gorai.001G001700	3	3	30	30	1	1	COP9-signalosome 5B	PF01398	PTHR10410,PTHR10410:SF6				GO:0005515	AT1G71230.1
Gorai.001G001800	4	4	4	4	12	12	Peroxidase family protein	PF00141			1.11.1.7	K00430	GO:0004601,GO:0020037,GO:0006979,GO:0055114	AT4G30170.1
Gorai.001G001900	7	7	6	55	34	4								AT2G24530.1
Gorai.001G002000	4	1	3	3	2	2	RING/U-box superfamily protein	PF00097	PTHR14155,PTHR14155:SF28					AT5G10650.1
Gorai.001G002100	1	21	9	33	25	0
Gorai.001G002200	7	2	14	1	75	1	WRKY DNA-binding protein 11	PF10533,PF03106					GO:0003700,GO:0043565,GO:0006355	AT4G31550.1
Gorai.001G002300	1	24	21	21	128	93				KOG4674				AT4G31570.1
Gorai.001G002400	12	1	4	4	59	97	PPPDE putative thiol peptidase family protein	PF05903	PTHR12378	KOG0324				AT4G17486.1
Gorai.001G002500	none	21	none	13	none	83	Protein kinase superfamily protein	PF00069	PTHR24420:SF948,PTHR24420	KOG1187			GO:0004672,GO:0005524,GO:0006468	AT5G20050.1
Gorai.001G002700	4	9	3	14	2	108	K+ transporter 1	PF00023,PF00520,PF11834,PF00027	PTHR10217:SF6,PTHR10217	KOG0498			GO:0005515,GO:0005216,GO:0006811,GO:0055085,GO:0016020	AT2G26650.1
Gorai.001G002800	7	4	17	9	28	2	Homeodomain-like superfamily protein	PF00249					GO:0003677	AT2G03500.1
Gorai.001G003100	3	2	11	10	61	3	pleiotropic drug resistance 10	PF01061,PF08370,PF00005	PTHR19241,PTHR19241:SF10	KOG0065			GO:0005524,GO:0016887,GO:0016020	AT3G30842.1
Gorai.001G003200	3	4	8	4	47	52	Leucine-rich repeat protein kinase family protein	PF04689,PF00069,PF00560,PF08263	PTHR24420,PTHR24420:SF779	KOG1187			GO:0004672,GO:0005524,GO:0006468,GO:0005515,GO:0003677,GO:0006355,GO:0005634	AT2G26730.1
Gorai.001G003300	1	32	4	4	84	6	fatty acyl-ACP thioesterases B	PF01643,PF12590			3.1.2.-,3.1.2.14	K10781	GO:0016790,GO:0006633	AT1G08510.1
Gorai.001G003400	8	3	26	11	28	19
Gorai.001G003500	0	2	2	5	0	23								AT2G25670.1
Gorai.001G003600	3	3	32	10	1	4	Plant protein of unknown function (DUF936)	PF06075						AT4G13370.1
Gorai.001G003700	5	5	1	20	1	56	ATP-dependent caseinolytic (Clp) protease/crotonase family protein	PF00378	PTHR11941,PTHR11941:SF19	KOG1684	4.2.1.17	K01692	GO:0003824,GO:0008152	AT4G13360.1
Gorai.001G003800	1	1	5	28	6	6	Heavy metal transport/detoxification superfamily protein	PF00403	PTHR22814,PTHR22814:SF53	KOG1603			GO:0046872,GO:0030001	AT3G24450.1
Gorai.001G003900	47	16	33	24	0	0	Serinc-domain containing serine and sphingolipid biosynthesis protein	PF03348	PTHR10383,PTHR10383:SF2	KOG2592			GO:0016020	AT3G24460.1
Gorai.001G004000	2	2	1	1	3	1	Leucine-rich repeat (LRR) family protein	PF08263	PTHR24420,PTHR24420:SF665	KOG0487				AT4G18670.1
Gorai.001G004200	3	9	9	16	13	47	Alcohol dehydrogenase transcription factor Myb/SANT-like family protein	PF10545		KOG4282				AT3G24490.1
Gorai.001G004300	19	none	44	none	0	none	aldehyde dehydrogenase 2C4	PF00171	PTHR11699,PTHR11699:SF46	KOG2450	1.2.1.68	K12355	GO:0016491,GO:0008152,GO:0055114	AT3G24503.1
Gorai.001G004400	17	1	10	6	62	5	aldehyde dehydrogenase 2C4	PF00171	PTHR11699,PTHR11699:SF46	KOG2450	1.2.1.68	K12355	GO:0016491,GO:0008152,GO:0055114	AT3G24503.1
Gorai.001G004500	1	4	8	9	123	13	FRIGIDA-like protein	PF07899						AT3G22440.1
Gorai.001G004600	1	43	4	48	8	0								AT2G25735.1
Gorai.001G004700	8	66	48	9	0	2								AT1G67910.1
Gorai.001G004800	2	1	1	19	1	36	Late embryogenesis abundant (LEA) hydroxyproline-rich glycoprotein family	PF03168						AT4G13270.1
Gorai.001G004900	1	1	17	9	36	2	serine-rich protein-related							AT3G13227.1
Gorai.001G005000	6	1	5	14	1	20	RAB homolog 1	PF00071	PTHR24073,PTHR24073:SF254	KOG0092			GO:0003924,GO:0005525,GO:0007264,GO:0005634,GO:0005737,GO:0005622	AT5G45130.1
Gorai.001G005100	11	22	11	11	49	150								AT3G29300.1
Gorai.001G005200	8	11	4	4	12	14	Regulator of Vps4 activity in the MVB pathway protein	PF03398	PTHR12161,PTHR12161:SF1					AT4G32350.1
Gorai.001G005300	11	3	22	11	0	0								AT3G24535.1
Gorai.001G005400	3	3	8	20	37	4	ovate family protein 8	PF04844						AT5G19650.1
Gorai.001G005500	1	1	4	6	2	5								AT5G19540.1
Gorai.001G005600	1	1	5	5	5	24	AAA-type ATPase family protein / ankyrin repeat family protein	PF00023,PF00004	PTHR24198:SF302,PTHR24198	KOG4412			GO:0005524,GO:0005515	AT3G24530.1
Gorai.001G005700	1	1	3	49	2	5	roline-rich extensin-like receptor kinase 4	PF07714	PTHR24420:SF822,PTHR24420	KOG1187			GO:0004672,GO:0005524,GO:0006468	AT2G18470.1
Gorai.001G005800	12	12	2	2	86	7	Protein of unknown function (DUF502)	PF04367						AT2G20120.1
Gorai.001G005900	8	8	1	1	28	1								AT5G42710.1
Gorai.001G006000	7	2	1	1	15	1	RHO guanyl-nucleotide exchange factor 8	PF03759					GO:0005089	AT3G24620.1
Gorai.001G006100	7	3	3	7	34	22	proteinaceous RNase P 1	PF01535,PF11977	PTHR24015					AT2G32230.1
Gorai.001G006200	2	3	13	0	23	22	cell division cycle 48B	PF00004	PTHR23077,PTHR23077:SF43	KOG0730			GO:0005524	AT2G03670.1
Gorai.001G006300	5	5	5	1	3	1								AT1G55205.1
Gorai.001G006400	55	1	51	4	158	70	Enoyl-CoA hydratase/isomerase family	PF00378,PF00725,PF02737	PTHR23309	KOG1683			GO:0003824,GO:0008152,GO:0003857,GO:0016491,GO:0006631,GO:0055114	AT4G29010.1
Gorai.001G006500	3	4	18	41	37	11	Tesmin/TSO1-like CXC domain-containing protein	PF03638	PTHR12446:SF7,PTHR12446	KOG1171				AT4G29000.1
Gorai.001G006600	12	12	0	4	155	10	CDK-activating kinase 1AT	PF00069	PTHR24056,PTHR24056:SF88	KOG0594			GO:0004672,GO:0005524,GO:0006468	AT4G28980.1
Gorai.001G006700	11	22	4	13	17	0	Phosphorylase superfamily protein	PF01048	PTHR21234,PTHR21234:SF10				GO:0003824,GO:0009116	AT4G28940.1
Gorai.001G006800	2	12	21	1	74	18
Gorai.001G006900	25	none	25	none	99	none	RNA polymerase subunit beta	PF00562	PTHR20856:SF3,PTHR20856				GO:0003677,GO:0003899,GO:0006351,GO:0032549	ATCG00190.1
Gorai.001G007000	4	4	8	6	5	9	basic helix-loop-helix (bHLH) DNA-binding superfamily protein							AT4G29100.1
Gorai.001G007100	2	2	7	8	1	3	Pyridine nucleotide-disulphide oxidoreductase family protein	PF07992	PTHR11938:SF4,PTHR11938	KOG1800	1.18.1.2	K00528	GO:0016491,GO:0055114	AT4G32360.1
Gorai.001G007200	18	3	6	2	27	4	Eukaryotic rpb5 RNA polymerase subunit family protein	PF01191,PF03871	PTHR10535	KOG3218		K03013	GO:0003677,GO:0003899,GO:0006351,GO:0005634	AT3G22320.1
Gorai.001G007300	47	9	12	11	1	19								AT4G28840.1
Gorai.001G007400	2	30	21	0	40	0	casein kinase I-like 3	PF00069	PTHR11909:SF18,PTHR11909	KOG1163	2.7.1.-	K00924	GO:0004672,GO:0005524,GO:0006468	AT4G28880.1
Gorai.001G007500	13	4	1	6	1	71	S-adenosyl-L-methionine-dependent methyltransferases superfamily protein	PF06859,PF02390	PTHR12315	KOG2899			GO:0008176,GO:0006400,GO:0008168,GO:0008152	AT5G51130.1
Gorai.001G007600	4	4	6	8	9	5	protein serine/threonine phosphatases;protein kinases;catalytics;cAMP-dependent protein kinase regulators;ATP binding;protein serine/threonine phosphatases	PF00069,PF00481,PF00027	PTHR13832,PTHR13832:SF160	KOG0614	2.7.11.11	K04345	GO:0004672,GO:0005524,GO:0006468,GO:0003824	AT2G20050.1
Gorai.001G007800	2	none	31	none	3	none	sugar transporter 14	PF00083	PTHR24063,PTHR24063:SF211	KOG0254			GO:0022857,GO:0055085,GO:0016021	AT1G77210.1
Gorai.001G007900	4	4	49	49	9	13	Exostosin family protein	PF03016	PTHR11062,PTHR11062:SF37	KOG1021			GO:0016020	AT5G19670.1
Gorai.001G008000	2	2	10	1	1	1	alpha/beta-Hydrolases superfamily protein	PF02450					GO:0008374,GO:0006629,GO:0004607	AT2G44970.1
Gorai.001G008100	4	9	20	13	21	21	Integrase-type DNA-binding superfamily protein	PF00847					GO:0003700,GO:0006355	AT5G11590.1
Gorai.001G008200	65	57	9	28	27	0	Protein of unknown function (DUF810)	PF05664						AT2G20010.2
Gorai.001G008300	3	45	0	27	0	0	Nuclear pore complex protein							AT1G55540.2
Gorai.001G008400	30	15	13	1	0	38	P-loop containing nucleoside triphosphate hydrolases superfamily protein	PF00271,PF00270	PTHR24031,PTHR24031:SF3	KOG0332			GO:0003676,GO:0005524,GO:0008026,GO:0004386	AT3G53110.1
Gorai.001G008500	3	4	10	2	38	21	Tetratricopeptide repeat (TPR)-like superfamily protein	PF01535	PTHR24015,PTHR24015:SF76					AT1G77170.1
Gorai.001G008600	none	9	none	22	none	6	Polyketide cyclase/dehydrase and lipid transport superfamily protein	PF10604						AT2G25770.1
Gorai.001G008700	1	1	14	22	20	0								AT1G52140.1
Gorai.001G008800	2	10	1	1	1	1	RNA-dependent RNA polymerase family protein	PF05183	PTHR23079	KOG0988			GO:0003968	AT2G19910.1
Gorai.001G008900	4	7	3	3	2	11	NADP-malic enzyme 4	PF00390,PF03949	PTHR23406:SF2,PTHR23406	KOG1257	1.1.1.40	K00029	GO:0016616,GO:0055114,GO:0051287	AT1G79750.1
Gorai.001G009000	2	none	15	none	0	none	cation/H+ exchanger 4	PF00999		KOG1650			GO:0015299,GO:0006812,GO:0055085,GO:0016021	AT3G44900.1
Gorai.001G009100	21	none	30	none	6	none	Phosphoglycerate mutase family protein	PF00300		KOG4754				AT1G58280.1
Gorai.001G009200	none	1	none	14	none	20	MATE efflux family protein	PF01554	PTHR11206:SF38,PTHR11206	KOG1347			GO:0015238,GO:0015297,GO:0006855,GO:0055085,GO:0016020	AT4G29140.1
Gorai.001G009300	4	4	35	11	2	2	IQ-domain 26	PF00612	PTHR10699:SF9,PTHR10699				GO:0005515	AT3G16490.1
Gorai.001G009400	3	3	7	7	22	22	Pectin lyase-like superfamily protein	PF01095	PTHR22931,PTHR22931:SF5		3.1.1.11	K01051	GO:0030599,GO:0042545,GO:0005618	AT5G19730.1
Gorai.001G009500	16	1	3	4	17	17
Gorai.001G009600	64	19	14	31	0	0	oxidative stress 3							AT5G56550.1
Gorai.001G009700	1	none	4	none	8	none	MAP kinase kinase 6	PF00069	PTHR24360,PTHR24360:SF39	KOG0581			GO:0004672,GO:0005524,GO:0006468	AT5G56580.1
Gorai.001G009800	5	2	1	2	1	1	Protein of unknown function (DUF1005)	PF06219						AT4G29310.1
Gorai.001G009900	2	8	1	7	1	1	Zinc finger C-x8-C-x5-C-x3-H type family protein	PF00642	PTHR14493	KOG1595			GO:0003676,GO:0008270	AT4G29190.1
Gorai.001G010000	29	1	11	14	0	20	myb domain protein 68	PF00249	PTHR10641				GO:0003677	AT5G65790.1
Gorai.001G010100	2	2	7	1	1	3	tRNA/rRNA methyltransferase (SpoU) family protein	PF08032,PF00588	PTHR12029:SF7,PTHR12029	KOG0838			GO:0003723,GO:0008173,GO:0006396,GO:0008168	AT2G19870.1
Gorai.001G010200	3	3	20	10	4	4	Mnd1 family protein	PF03962		KOG3433				AT4G29170.1
Gorai.001G010300	5	12	4	19	42	8	SNF7 family protein	PF03357	PTHR22761	KOG1656		K12194	GO:0015031	AT2G19830.1
Gorai.001G010400	3	3	33	33	0	61
Gorai.001G010500	2	2	1	1	1	1	Regulator of Vps4 activity in the MVB pathway protein	PF03398	PTHR12161:SF4,PTHR12161	KOG2027				AT2G19710.1
Gorai.001G010600	5	5	17	1	42	59	Mitochondrial ATP synthase subunit G protein	PF04718	PTHR12386,PTHR12386:SF7				GO:0015078,GO:0015986,GO:0000276	AT4G29480.1
Gorai.001G010800	0	1	0	1	7	97								AT4G29520.1
Gorai.001G010900	2	2	5	1	3	3								AT5G11780.1
Gorai.001G011000	17	4	14	2	0	6	N-MYC downregulated-like 1	PF03096	PTHR11034,PTHR11034:SF3	KOG2931				AT5G56750.1
Gorai.001G011100	9	9	4	26	8	69	ACC oxidase 1	PF03171	PTHR10209,PTHR10209:SF55	KOG0143	1.14.17.4	K05933	GO:0016491,GO:0016706,GO:0055114	AT2G19590.1
Gorai.001G011200	8	8	10	10	4	4	tetraspanin2	PF00335	PTHR19282,PTHR19282:SF137	KOG3882			GO:0016021	AT2G19580.1
Gorai.001G011300	2	2	5	0	3	3	Transducin family protein / WD-40 repeat family protein	PF00400,PF12265	PTHR22850:SF6,PTHR22850	KOG0302			GO:0005515	AT2G19540.1
Gorai.001G011400	10	3	9	1	58	4								AT5G56850.1
Gorai.001G011500	5	2	10	1	1	1								AT1G55160.1
Gorai.001G011600	1	32	3	3	5	5	beta-galactosidase 12	PF01301	PTHR23421,PTHR23421:SF33	KOG0496	3.2.1.23	K01190	GO:0004553,GO:0005975,GO:0004565,GO:0009341	AT4G26140.1
Gorai.001G011700	1	14	3	18	5	100								AT3G60310.1
Gorai.001G011800	8	19	19	0	0	111	polyamine oxidase 5	PF01593	PTHR10742:SF40,PTHR10742	KOG0685			GO:0016491,GO:0055114	AT4G29720.1
Gorai.001G011900	3	3	20	10	4	85								AT5G56880.1
Gorai.001G012000	2	15	6	5	0	9	Protein kinase superfamily protein	PF07714	PTHR24420,PTHR24420:SF801	KOG1187			GO:0004672,GO:0005524,GO:0006468	AT5G56890.1
Gorai.001G012100	1	4	3	19	2	2								AT5G56980.1
Gorai.001G012200	9	5	10	10	0	7	Translation initiation factor SUI1 family protein	PF01253	PTHR12789	KOG3239			GO:0003743,GO:0006413	AT5G11900.1
Gorai.001G012400	32	6	10	5	0	0	basic helix-loop-helix (bHLH) DNA-binding family protein	PF00010	PTHR12565				GO:0030528,GO:0006355	AT5G56960.1
Gorai.001G012500	12	11	21	2	64	1	nucleosome assembly protein 1;3	PF00956	PTHR11875,PTHR11875:SF7	KOG1507			GO:0006334,GO:0005634	AT5G56950.1
Gorai.001G012600	1	1	14	0	20	5	one helix protein							AT5G02120.1
Gorai.001G012700	4	1	30	11	0	19	heat shock transcription factor A2	PF00447	PTHR10015,PTHR10015:SF7	KOG0627			GO:0003700,GO:0043565,GO:0006355,GO:0005634	AT2G26150.1
Gorai.001G012800	5	5	1	1	1	43								AT5G57000.1
Gorai.001G012900	9	2	5	13	6	23	Lycopene beta/epsilon cyclase protein	PF05834	PTHR10617:SF33,PTHR10617				GO:0016705,GO:0016117,GO:0016491,GO:0055114	AT5G57030.1
Gorai.001G013000	4	4	0	1	19	37	Homeodomain-like/winged-helix DNA-binding family protein	PF00538,PF00249	PTHR21717,PTHR21717:SF9				GO:0003677,GO:0006334,GO:0000786,GO:0005634	AT1G72740.2
Gorai.001G013100	4	1	8	3	115	2	membrane bound O-acyl transferase (MBOAT) family protein	PF03062	PTHR10408	KOG0380	2.3.1.20,2.3.1.75,2.3.1.76	K11155		AT2G19450.1
Gorai.001G013200	9	2	1	8	4	53	Protein of unknown function (DUF3511)	PF12023						AT5G11970.1
Gorai.001G013300	1	14	3	4	2	2	casein kinase 1	PF00069	PTHR11909:SF18,PTHR11909	KOG1163	2.7.11.1	K02218	GO:0004672,GO:0005524,GO:0006468	AT4G26100.1
Gorai.001G013400	1	4	0	43	0	11								AT2G19390.1
Gorai.001G013500	14	6	6	2	5	48	Protein phosphatase 2C family protein	PF00481	PTHR13832,PTHR13832:SF115	KOG0698	3.1.3.16	K14497	GO:0003824	AT5G57050.1
Gorai.001G013600	1	15	3	3	2	117	MAP kinase kinase 2	PF00069	PTHR24360,PTHR24360:SF39	KOG0581			GO:0004672,GO:0005524,GO:0006468	AT4G29810.1
Gorai.001G013700	16	19	4	13	55	118	homolog of CFIM-25		PTHR13047	KOG1689				AT4G29820.1
Gorai.001G013800	1	1	4	3	8	2	Ribosomal protein L18ae family		PTHR10052,PTHR10052:SF2				GO:0006412,GO:0005840,GO:0003735	AT4G26060.1
Gorai.001G013900	5	5	2	1	1	1	zinc ion binding	PF08790	PTHR13100,PTHR13100:SF4	KOG2186				AT2G19385.1
Gorai.001G014000	1	1	7	17	6	36	Transducin/WD40 repeat-like superfamily protein	PF00400	PTHR22841,PTHR22841:SF5	KOG0265		K12602	GO:0005515	AT4G29830.1
Gorai.001G014100	5	13	7	1	39	39	Myosin family protein with Dil domain	PF00612,PF00063,PF02736,PF01843	PTHR13140	KOG0160			GO:0003774,GO:0005524,GO:0016459,GO:0005515	AT5G20490.1
Gorai.001G014200	6	2	1	5	18	62	nuclear factor Y, subunit A5	PF02045	PTHR12632:SF5,PTHR12632				GO:0003700,GO:0006355,GO:0005634	AT1G54160.1
Gorai.001G014300	1	1	2	3	7	2	SNF7 family protein	PF03357	PTHR10476,PTHR10476:SF4	KOG3230		K12191	GO:0015031	AT2G06530.1
Gorai.001G014400	4	4	4	19	12	2	RING/U-box superfamily protein	PF00097	PTHR22764	KOG1493				AT5G17600.1
Gorai.001G014500	3	0	5	27	4	4	photosystem II subunit X	PF06596					GO:0015979,GO:0009523,GO:0016020	AT2G06520.1
Gorai.001G014700	11	11	4	17	42	7	Ribosomal protein S3 family protein	PF00189,PF07650	PTHR11760	KOG3181		K02985	GO:0003735,GO:0006412,GO:0005622,GO:0005840,GO:0003723	AT5G35530.1
Gorai.001G014800	3	8	1	13	12	1	ELF4-like 3	PF07011						AT2G06255.1
Gorai.001G014900	none	2	none	0	none	1	acyl-CoA-binding protein 6	PF00887	PTHR23310,PTHR23310:SF10				GO:0000062	AT1G31812.1
Gorai.001G015000	3	9	11	11	19	19	DREB2A-interacting protein 2		PTHR10825,PTHR10825:SF3					AT2G30580.1
Gorai.001G015100	2	13	7	2	1	50	Stress responsive alpha-beta barrel domain protein	PF07876						AT2G31670.1
Gorai.001G015200	7	7	4	4	12	15	Duplicated homeodomain-like superfamily protein	PF00249	PTHR10641	KOG0048			GO:0003677	AT5G35550.1
Gorai.001G015300	8	7	4	1	87	15	binding	PF07719,PF00515	PTHR14027	KOG2002			GO:0005515	AT2G06210.1
Gorai.001G015400	2	0	8	0	74	1	germin 3	PF00190					GO:0045735	AT5G20630.1
Gorai.001G015500	4	1	9	6	31	5								AT5G21940.1
Gorai.001G015600	11	11	4	4	10	10	RING-box 1		PTHR11210	KOG2930				AT5G20570.1
Gorai.001G015700	3	18	20	18	3	156								AT5G20635.1
Gorai.001G015800	2	10	21	1	40	4	NagB/RpiA/CoA transferase-like superfamily protein	PF01008	PTHR10233,PTHR10233:SF6	KOG1468			GO:0044237	AT2G05830.4
Gorai.001G015900	1	14	9	0	24	123	TRICHOME BIREFRINGENCE-LIKE 16	PF03005	PTHR13533,PTHR13533:SF6					AT5G20680.1
Gorai.001G016000	1	1	19	3	2	5	inter-alpha-trypsin inhibitor heavy chain-related	PF00092	PTHR10338,PTHR10338:SF8				GO:0005515	AT1G19110.1
Gorai.001G016100	1	1	0	6	36	5	Small nuclear ribonucleoprotein family protein	PF01423	PTHR15588,PTHR15588:SF5	KOG1782				AT3G14080.1
Gorai.001G016200	39	42	13	12	29	20	actin-11	PF00022	PTHR11937					AT3G12110.1
Gorai.001G016300	8	12	4	36	12	114	Leucine-rich repeat protein kinase family protein	PF00069,PF00560,PF08263	PTHR24420,PTHR24420:SF823	KOG1187			GO:0004672,GO:0005524,GO:0006468,GO:0005515	AT3G42880.1
Gorai.001G016400	3	2	20	1	1	26	photosystem I light harvesting complex gene 6	PF00504	PTHR21649			K08908	GO:0016020,GO:0009765	AT1G19150.1
Gorai.001G016500	14	2	5	2	56	58	Pectin lyase-like superfamily protein	PF00295					GO:0004650,GO:0005975	AT1G19170.1
Gorai.001G016600	20	5	3	4	0	10	oligouridylate binding protein 1B	PF00076	PTHR24012:SF210,PTHR24012	KOG0148			GO:0003676	AT1G17370.1
Gorai.001G016700	16	7	4	4	12	12	Protein of unknown function (DUF581)	PF04570						AT1G74940.1
Gorai.001G016800	34	34	8	17	37	88	Integrase-type DNA-binding superfamily protein	PF00847					GO:0003700,GO:0006355	AT1G19210.1
Gorai.001G016900	31	31	2	17	130	96	chaperonin 20	PF00166	PTHR10772:SF0,PTHR10772	KOG1641			GO:0006457,GO:0005737	AT5G20720.1
Gorai.001G017000	7	4	3	6	9	9	auxin response factor 19	PF02309,PF06507,PF02362		KOG1142			GO:0006355,GO:0005634,GO:0003677,GO:0009725	AT1G19220.1
Gorai.001G017100	5	2	7	1	1	3	ARM repeat superfamily protein	PF08161	PTHR21576,PTHR21576:SF2	KOG1248				AT2G34357.1
Gorai.001G017200	3	2	1	20	1	3	Plant invertase/pectin methylesterase inhibitor superfamily protein	PF04043	PTHR22931:SF14,PTHR22931				GO:0004857,GO:0030599	AT5G20740.1
Gorai.001G017300	2	0	1	5	1	3								AT5G20790.1
Gorai.001G017400	1	1	14	3	108	2	Riboflavin synthase-like superfamily protein	PF08022,PF08414,PF08030,PF01794	PTHR11972:SF5,PTHR11972	KOG0039			GO:0005506,GO:0009055,GO:0016491,GO:0050660,GO:0016021,GO:0055114,GO:0004601,GO:0050664	AT1G19230.1
Gorai.001G017500	3	3	1	1	1	4	SAUR-like auxin-responsive protein family	PF02519						AT3G43120.1
Gorai.001G017600	11	20	14	20	17	86	SAUR-like auxin-responsive protein family	PF02519						AT5G20820.1
Gorai.001G017700	21	1	2	8	3	5	sucrose synthase 4	PF00534,PF00862	PTHR12526,PTHR12526:SF27	KOG0853			GO:0009058,GO:0005985	AT3G43190.1
Gorai.001G017800	7	2	2	2	15	1	Phosphoinositide phosphatase family protein	PF02383	PTHR11200:SF9,PTHR11200	KOG1888			GO:0042578	AT3G43220.1
Gorai.001G017900	7	3	1	2	16	15	LJRHL1-like 3	PF00010	PTHR16223,PTHR16223:SF1				GO:0030528,GO:0006355	AT5G58010.1
Gorai.001G018000	4	1	2	2	13	24	ARID/BRIGHT DNA-binding domain-containing protein	PF01388	PTHR22970,PTHR22970:SF1				GO:0003677,GO:0005622	AT3G43240.1
Gorai.001G018100	1	24	8	43	63	5	phosphatidylinositol-4-phosphate 5-kinase family protein	PF01504,PF01363,PF00118	PTHR11353:SF14,PTHR11353	KOG0230			GO:0005524,GO:0044267,GO:0046872,GO:0016307,GO:0046488	AT3G14270.1
Gorai.001G018200	0	1	14	8	17	5	Plant invertase/pectin methylesterase inhibitor superfamily	PF01095,PF04043	PTHR22931,PTHR22931:SF5				GO:0030599,GO:0042545,GO:0005618,GO:0004857	AT5G20860.1
Gorai.001G018300	8	2	4	1	14	1	Plant invertase/pectin methylesterase inhibitor superfamily	PF01095,PF04043	PTHR22931,PTHR22931:SF5		3.1.1.11	K01051	GO:0030599,GO:0042545,GO:0005618,GO:0004857	AT3G43270.1
Gorai.001G018400	2	2	5	2	3	1	Haloacid dehalogenase-like hydrolase (HAD) superfamily protein	PF06941					GO:0016791	AT4G33140.1
Gorai.001G018500	7	2	2	1	15	1	abscisic acid responsive elements-binding factor 2							AT1G45249.3
Gorai.001G018600	7	2	2	18	15	3	Protein of unknown function, DUF547	PF04784	PTHR23054					AT3G13000.2
Gorai.001G018700	24	24	21	21	11	11	HOPM interactor 7	PF09324,PF01369	PTHR10663,PTHR10663:SF56	KOG0929		K13462	GO:0005086,GO:0032012,GO:0005622	AT3G43300.1
Gorai.001G018800	4	4	3	11	2	2	jasmonate-zim-domain protein 12	PF09425,PF06200				K13464	GO:0005515	AT5G20900.1
Gorai.001G018900	1	1	17	17	8	8	Transmembrane proteins 14C	PF03647	PTHR12668	KOG4267			GO:0016020	AT3G43520.1
Gorai.001G019100	22	22	47	47	0	0	Integrase-type DNA-binding superfamily protein	PF00847					GO:0003700,GO:0006355	AT1G19210.1
Gorai.001G019200	10	10	4	7	0	1		PF00533	PTHR13561:SF20,PTHR13561				GO:0005622	AT2G26270.1
Gorai.001G019300	1	1	3	3	2	2	Protein of unknown function (DUF1677)	PF07911						AT1G72510.1
Gorai.001G019400	1	1	3	3	2	2	copper transporter 5	PF04145	PTHR12483:SF1,PTHR12483	KOG3386			GO:0005375,GO:0035434,GO:0016021	AT5G20650.1
Gorai.001G019500	1	1	4	25	17	20	root-specific kinase 1	PF00069	PTHR24420,PTHR24420:SF684	KOG1187			GO:0004672,GO:0005524,GO:0006468	AT2G26290.1
Gorai.001G019600	2	2	1	1	1	1	Chalcone-flavanone isomerase family protein	PF02431					GO:0016872,GO:0042398	AT2G26310.1
Gorai.001G019700	19	6	1	1	3	3								AT5G21940.1
Gorai.001G019800	7	8	3	1	12	1	Leucine-rich receptor-like protein kinase family protein	PF00069,PF00560,PF08263	PTHR24420,PTHR24420:SF825	KOG1187			GO:0004672,GO:0005524,GO:0006468,GO:0005515	AT2G26330.1
Gorai.001G019900	6	2	5	1	0	1	YGGT family protein	PF02325				K02221	GO:0016020	AT5G21920.1
Gorai.001G020000	4	4	0	8	13	60			PTHR23125:SF141,PTHR23125	KOG1947				AT2G06040.1
Gorai.001G020100	4	1	3	19	2	36								AT2G26340.1
Gorai.001G020200	4	4	16	16	2	63	F-box family protein	PF00646	PTHR23125,PTHR23125:SF57	KOG1947			GO:0005515	AT4G33210.1
Gorai.001G020300	2	2	5	1	3	1	Duplicated homeodomain-like superfamily protein							AT1G76880.1
Gorai.001G020400	2	64	1	30	3	3	myb domain protein 7	PF00249	PTHR10641	KOG0048			GO:0003677	AT2G16720.1
Gorai.001G020500	none	11	none	22	none	3	myb domain protein 7	PF00249	PTHR10641	KOG0048			GO:0003677	AT2G16720.1
Gorai.001G020600	5	8	51	5	4	3	Duplicated homeodomain-like superfamily protein	PF00249	PTHR10641	KOG0048		K09422	GO:0003677	AT5G35550.1
Gorai.001G020700	3	4	1	2	16	13	peroxin 10	PF00097,PF04757	PTHR23350	KOG0317		K13346	GO:0007031,GO:0005778	AT2G26350.1
Gorai.001G020800	41	53	42	37	35	157	Ribosomal protein S3 family protein		PTHR11760					AT5G35530.1
Gorai.001G020900	2	2	1	2	1	1	mechanosensitive channel of small conductance-like 10	PF00924		KOG4629			GO:0055085,GO:0016020	AT5G12080.1
Gorai.001G021000	4	3	8	1	5	16								AT3G13980.1
Gorai.001G021100	1	4	3	5	2	23	Nitrilase/cyanide hydratase and apolipoprotein N-acyltransferase family protein	PF00795	PTHR23088	KOG0806	3.5.1.3	K13566	GO:0016810,GO:0006807	AT5G12040.1
Gorai.001G021200	13	17	8	2	104	24	Pentatricopeptide repeat (PPR-like) superfamily protein	PF01535	PTHR24015					AT1G05670.1
Gorai.001G021300	3	3	9	12	0	2	alfin-like 5	PF00628,PF12165	PTHR23123	KOG1632			GO:0005515	AT5G20510.1
Gorai.001G021400	31	31	4	4	96	96	17.6 kDa class II heat shock protein	PF00011	PTHR11527,PTHR11527:SF14	KOG0710				AT5G12020.1
Gorai.001G021500	13	21	46	4	0	14	WRKY DNA-binding protein 50	PF03106					GO:0003700,GO:0043565,GO:0006355	AT5G26170.1
Gorai.001G021600	7	7	6	16	9	44								AT5G26160.1
Gorai.001G021700	2	5	8	1	53	1		PF05254	PTHR21329:SF9,PTHR21329	KOG3481				AT4G33100.1
Gorai.001G021800	5	14	1	2	39	81	aminopeptidase M1	PF01433	PTHR11533:SF97,PTHR11533	KOG1046	3.4.11.-	K08776	GO:0008237,GO:0008270,GO:0006508	AT4G33090.1
Gorai.001G021900	8	8	11	11	0	0
Gorai.001G022000	5	2	2	20	1	90		PF03168						AT5G11890.1
Gorai.001G022100	1	9	22	11	6	19	LOB domain-containing protein 22	PF03195						AT3G13850.1
Gorai.001G022200	1	1	5	2	0	24	FTSH protease 4	PF01434,PF00004	PTHR23076	KOG0734			GO:0005524,GO:0004222,GO:0006508,GO:0009378,GO:0006281,GO:0006310,GO:0003678,GO:0016887	AT2G26140.1
Gorai.001G022300	3	3	20	7	4	22	IQ-domain 6	PF00612	PTHR13140,PTHR13140:SF84				GO:0005515	AT2G26180.1
Gorai.001G022400	15	15	6	5	9	51	calmodulin-binding family protein							AT4G33050.3
Gorai.001G022500	1	1	4	4	8	8	Protein of unknown function (DUF803)	PF05653		KOG2922			GO:0016020	AT5G11960.1
Gorai.001G022600	19	64	22	28	6	83	Protein of unknown function (DUF3511)	PF12023						AT5G11970.1
Gorai.001G022700	3	7	10	1	4	4	Protein of unknown function (DUF761)							AT2G26110.1
Gorai.001G022800	13	1	7	7	64	52	Protein kinase superfamily protein	PF07714	PTHR23257:SF80,PTHR23257	KOG0192	2.7.11.25	K04424	GO:0004672,GO:0005524,GO:0006468	AT5G11850.1
Gorai.001G022900	3	4	1	9	37	2	Protein of unknown function (DUF778)	PF05608	PTHR20921	KOG3150				AT2G26070.1
Gorai.001G023000	9	4	14	25	108	77	PYR1-like 2	PF10604				K14496	GO:0006952,GO:0009607	AT2G26040.1
Gorai.001G023100	3	3	20	7	4	22	homeobox gene 1	PF07526,PF00046	PTHR11850:SF14,PTHR11850	KOG0773			GO:0003700,GO:0043565,GO:0006355	AT4G32980.1
Gorai.001G023200	1	1	0	18	5	66	N-MYC downregulated-like 1	PF03096	PTHR11034,PTHR11034:SF3	KOG2931				AT5G56750.1
Gorai.001G023300	1	24	3	1	30	52	Protein phosphatase 2A, regulatory subunit PR55	PF00400	PTHR11871	KOG1354			GO:0005515,GO:0008601,GO:0007165,GO:0000159	AT1G17720.2
Gorai.001G023400	12	1	1	4	20	8
Gorai.001G023500	14	14	9	2	158	7	NADH-ubiquinone oxidoreductase 20 kDa subunit, mitochondrial	PF01058	PTHR11995	KOG1687	1.6.5.3,1.6.99.3	K03940	GO:0008137,GO:0048038,GO:0051539,GO:0055114,GO:0016651	AT5G11770.1
Gorai.001G023600	11	2	15	1	1	1		PF10258	PTHR13135	KOG3948				AT3G20430.1
Gorai.001G023700	1	1	4	4	2	8	gamma vacuolar processing enzyme	PF01650	PTHR12000:SF2,PTHR12000	KOG1348	3.4.22.34	K01369	GO:0004197,GO:0006508	AT4G32940.1
Gorai.001G023800	1	1	6	3	9	2	Protein of unknown function (DUF1639)	PF07797						AT1G55340.2
Gorai.001G023900	10	7	1	1	57	57
Gorai.001G024000	1	4	3	16	2	12	hydroxyproline-rich glycoprotein family protein							AT2G25930.1
Gorai.001G024100	1	1	4	3	2	2	hydroxyproline-rich glycoprotein family protein					K12125		AT2G25930.1
Gorai.001G024200	none	1	none	30	none	6	Polyketide cyclase/dehydrase and lipid transport superfamily protein	PF00407					GO:0006952,GO:0009607	AT5G28010.1
Gorai.001G024300	19	9	20	20	4	4	myb domain protein 68	PF00249	PTHR10641	KOG0048			GO:0003677	AT5G65790.1
Gorai.001G024400	1	4	4	4	2	17	Zinc finger C-x8-C-x5-C-x3-H type family protein	PF00642	PTHR14493	KOG1595			GO:0003676,GO:0008270	AT4G29190.1
Gorai.001G024500	2	15	6	1	0	38		PF02686	PTHR13373:SF14,PTHR13373				GO:0006450	AT4G32915.1
Gorai.001G024600	7	7	21	6	60	9	Tetratricopeptide repeat (TPR)-like superfamily protein		PTHR15502,PTHR15502:SF7					AT4G32820.1
Gorai.001G024700	5	2	1	4	59	1								AT1G76480.2
Gorai.001G024900	2	2	1	1	1	1	ataurora1	PF00069	PTHR24350	KOG0580	2.7.11.1	K08850	GO:0004672,GO:0005524,GO:0006468	AT4G32830.1
Gorai.001G025000	1	9	3	4	27	2	phosphofructokinase 3	PF00365	PTHR13697	KOG2440	2.7.1.11	K00850	GO:0003872,GO:0006096,GO:0005945	AT4G26270.1
Gorai.001G025100	5	25	16	16	68	29	vacuolar ATP synthase catalytic subunit-related / V-ATPase-related / vacuolar proton pump-related							AT1G16820.1
Gorai.001G025200	23	13	41	16	29	55	vacuolar ATP synthase catalytic subunit-related / V-ATPase-related / vacuolar proton pump-related							AT1G16820.1
Gorai.001G025300	0	1	9	31	13	6	profilin 5	PF00235	PTHR11604	KOG1755			GO:0003779,GO:0007010,GO:0015629,GO:0030036	AT2G19770.1
Gorai.001G025400	23	12	15	16	29	64	vacuolar ATP synthase catalytic subunit-related / V-ATPase-related / vacuolar proton pump-related							AT1G16820.1
Gorai.001G025500	9	23	16	16	2	29	Mitochondrial transcription termination factor family protein	PF02536	PTHR13068,PTHR13068:SF3	KOG1267				AT1G79220.1
Gorai.001G025600	12	20	24	13	7	55	early nodulin-related	PF03386						AT5G25940.1
Gorai.001G025700	15	23	8	7	92	126	nuclear poly(a) polymerase	PF04926,PF01909,PF04928	PTHR10682:SF5,PTHR10682	KOG2245			GO:0016779,GO:0003723,GO:0004652,GO:0043631,GO:0005634,GO:0006351	AT4G32850.10
Gorai.001G025800	6	20	33	1	0	7	early nodulin-related	PF03386						AT5G25940.1
Gorai.001G025900	10	1	43	3	32	2	poly(A) polymerase 2	PF04926,PF01909,PF04928	PTHR10682:SF5,PTHR10682	KOG2245	2.7.7.19	K14376	GO:0016779,GO:0003723,GO:0004652,GO:0043631,GO:0005634,GO:0006351	AT2G25850.4
Gorai.001G026000	4	3	7	0	22	51	Protein kinase family protein with leucine-rich repeat domain	PF00069,PF00560,PF08263	PTHR24420,PTHR24420:SF789	KOG1187			GO:0004672,GO:0005524,GO:0006468,GO:0005515	AT5G25930.1
Gorai.001G026100	4	1	19	4	2	8	ATP-dependent protease La (LON) domain protein	PF02190	PTHR14255	KOG1400		K11793	GO:0004176,GO:0006508	AT2G25740.1
Gorai.001G026200	1	1	3	4	2	8	NADP-malic enzyme 3	PF00390,PF03949	PTHR23406:SF2,PTHR23406	KOG1257	1.1.1.40	K00029	GO:0016616,GO:0055114,GO:0051287	AT5G25880.1
Gorai.001G026300	10	31	43	0	11	0	Protein kinase family protein	PF00069	PTHR11909:SF20,PTHR11909	KOG1164			GO:0004672,GO:0005524,GO:0006468	AT2G25760.1
Gorai.001G026400	2	1	0	1	1	6	Polyketide cyclase/dehydrase and lipid transport superfamily protein	PF10604						AT4G32870.1
Gorai.001G026500	8	0	1	1	1	0	alpha/beta-Hydrolases superfamily protein	PF12146	PTHR11614,PTHR11614:SF20	KOG1455				AT5G11650.1
Gorai.001G026600	9	1	6	4	27	2	Papain family cysteine protease	PF00112,PF08246	PTHR12411:SF42,PTHR12411	KOG1542			GO:0008234,GO:0006508	AT2G21430.1
Gorai.001G026700	3	8	32	8	1	53	Leucine-rich receptor-like protein kinase family protein	PF00069,PF00560,PF08263	PTHR24420	KOG1187			GO:0004672,GO:0005524,GO:0006468,GO:0005515	AT2G25790.1
Gorai.001G026800	0	0	8	10	0	0	homeobox gene 8	PF08670,PF01852,PF00046	PTHR24326,PTHR24326:SF218			K09338	GO:0003700,GO:0043565,GO:0006355	AT4G32880.1
Gorai.001G026900	1	2	6	23	5	0	Regulator of chromosome condensation (RCC1) family protein	PF00415	PTHR22870:SF10,PTHR22870	KOG1427				AT5G11580.1
Gorai.001G027000	1	9	25	8	77	47	carotenoid cleavage dioxygenase 8	PF03055	PTHR10543,PTHR10543:SF6	KOG1285				AT4G32810.1
Gorai.001G027100	43	47	37	22	0	1	Phosphorylase superfamily protein	PF01048	PTHR21234,PTHR21234:SF10				GO:0003824,GO:0009116	AT4G28940.1
Gorai.001G027200	9	3	32	10	6	4	tocopherol cyclase, chloroplast / vitamin E deficient 1 (VTE1) / sucrose export defective 1 (SXD1)					K09834		AT4G32770.1
Gorai.001G027300	31	28	47	27	130	0	HSP20-like chaperones superfamily protein	PF00011	PTHR11527					AT1G53540.1
Gorai.001G027400	21	23	16	16	0	29
Gorai.001G027500	11	11	4	15	10	14	D-arabinono-1,4-lactone oxidase family protein	PF01565,PF04030	PTHR13878,PTHR13878:SF10	KOG4730			GO:0008762,GO:0016491,GO:0050660,GO:0055114,GO:0003885,GO:0016020	AT5G11540.1
Gorai.001G027600	4	4	3	3	5	2	embryonic flower 1 (EMF1)							AT5G11530.1
Gorai.001G027700	8	2	29	16	34	1	embryonic flower 1 (EMF1)							AT5G11530.1
Gorai.001G027800	12	12	17	19	8	2	peroxin4	PF00179	PTHR24067:SF25,PTHR24067	KOG0417	6.3.2.19	K10689	GO:0016881	AT5G25760.1
Gorai.001G027900	1	14	16	7	68	64	ENTH/VHS/GAT family protein	PF03127,PF00790	PTHR13856,PTHR13856:SF27	KOG1087			GO:0006886,GO:0005622	AT4G32760.2
Gorai.001G028000	2	2	1	1	1	1	aspartate aminotransferase 3	PF00155	PTHR11879	KOG1411			GO:0016740,GO:0030170,GO:0009058,GO:0016769,GO:0008483,GO:0006520	AT5G11520.1
Gorai.001G028100	1	1	3	9	5	48	aspartate aminotransferase 3	PF00155	PTHR11879	KOG1411	2.6.1.1	K00813	GO:0016740,GO:0030170,GO:0009058,GO:0016769,GO:0008483,GO:0006520	AT5G11520.1
Gorai.001G028200	8	3	1	2	87	13	Homeodomain-like protein	PF00249	PTHR10641	KOG0048			GO:0003677	AT4G32730.2
Gorai.001G028400	8	27	7	1	23	1	La protein 1	PF08777,PF00076,PF05383	PTHR22792,PTHR22792:SF4	KOG4213		K11090	GO:0003676	AT4G32720.1
Gorai.001G028600	11	11	1	17	59	7		PF05670	PTHR13049	KOG3272				AT5G11500.1
Gorai.001G028700	2	5	1	10	28	1	Sulfite exporter TauE/SafE family protein	PF01925	PTHR14255				GO:0016021	AT2G25737.1
Gorai.001G028800	11	2	17	17	1	1	Zinc-binding ribosomal protein family protein	PF01907	PTHR10768	KOG3475			GO:0003735,GO:0006412,GO:0005622,GO:0005840	AT3G16080.1
Gorai.001G028900	2	2	4	4	14	14	Flavin-binding monooxygenase family protein	PF00743	PTHR23023:SF5,PTHR23023	KOG1399	1.14.13.-	K11816	GO:0004499,GO:0050660,GO:0050661,GO:0055114,GO:0016491	AT5G25620.1
Gorai.001G029000	2	8	1	4	38	1	bromo-adjacent homology (BAH) domain-containing protein	PF01426					GO:0003677	AT5G11470.1
Gorai.001G029100	4	none	26	none	0	none								AT2G25735.1
Gorai.001G029200	0	3	1	1	0	4	Tetratricopeptide repeat (TPR)-like superfamily protein	PF01535	PTHR24015:SF112,PTHR24015					AT3G15130.1
Gorai.001G029300	23	4	2	9	24	8								AT4G32680.1
Gorai.001G029400	2	12	1	31	1	0	potassium channel in Arabidopsis thaliana 3	PF11834,PF00520,PF00027	PTHR10217:SF6,PTHR10217	KOG0498			GO:0005216,GO:0006811,GO:0055085,GO:0016020	AT4G32650.3
Gorai.001G029500	1	16	7	13	126	55								AT5G25570.1
Gorai.001G029600	2	2	2	18	1	67	pyrroline-5- carboxylate (P5C) reductase	PF03807	PTHR11645	KOG3124	1.5.1.2	K00286	GO:0016616,GO:0051287,GO:0046168,GO:0055114,GO:0005737,GO:0004616,GO:0006098,GO:0016491,GO:0006561,GO:0004735	AT5G14800.1
Gorai.001G029700	4	1	3	6	2	2	S-adenosyl-L-methionine-dependent methyltransferases superfamily protein	PF08241	PTHR10108,PTHR10108:SF276	KOG3010			GO:0008168,GO:0008152	AT2G41380.1
Gorai.001G029800	2	13	1	4	26	64	Protein of unknown function (DUF1336)	PF01852,PF07059	PTHR12136:SF13,PTHR12136	KOG2761				AT5G35180.2
Gorai.001G029900	5	5	17	17	1	42	Ribosomal protein L39 family protein	PF00832	PTHR19970	KOG0002		K02924	GO:0003735,GO:0006412,GO:0005622,GO:0005840	AT4G31985.1
Gorai.001G030000	none	4	none	1	none	16	Glycosyl hydrolase family protein with chitinase insertion domain	PF00704	PTHR11177,PTHR11177:SF22	KOG2806			GO:0004553,GO:0005975	AT4G19810.1
Gorai.001G030200	39	none	9	none	0	none	S-locus lectin protein kinase family protein	PF00704,PF07714	PTHR24420:SF430,PTHR24420	KOG1187			GO:0004672,GO:0005524,GO:0006468,GO:0004553,GO:0005975	AT1G11330.2
Gorai.001G030300	3	none	45	none	1	none	Glycosyl hydrolase family protein with chitinase insertion domain	PF00704	PTHR11177,PTHR11177:SF22	KOG2806			GO:0004553,GO:0005975	AT4G19810.1
Gorai.001G030400	40	46	25	11	134	61	Glycosyl hydrolase family protein with chitinase insertion domain	PF00704	PTHR11177,PTHR11177:SF22	KOG2806	3.2.1.14	K01183	GO:0004553,GO:0005975	AT4G19810.1
Gorai.001G030500	1	1	9	24	25	109	alpha/beta-Hydrolases superfamily protein		PTHR12277:SF8,PTHR12277	KOG1552				AT4G31020.1
Gorai.001G030600	3	2	2	1	4	1	response regulator 12	PF00072,PF00249	PTHR26402:SF38,PTHR26402				GO:0000156,GO:0000160,GO:0006355,GO:0003677	AT2G25180.1
Gorai.001G030700	1	1	3	3	2	2	Protein of unknown function (DUF1068)	PF06364	PTHR17695					AT2G24290.1
Gorai.001G030800	8	2	20	13	4	3	alpha/beta-Hydrolases superfamily protein	PF05577	PTHR11010,PTHR11010:SF8	KOG2183	3.4.16.2	K01285	GO:0008236,GO:0006508	AT2G24280.1
Gorai.001G030900	55	none	44	none	6	none	molybdate transporter 1							AT2G25680.1
Gorai.001G031100	2	29	1	33	1	0	temperature-induced lipocalin	PF08212	PTHR10612,PTHR10612:SF7	KOG4824			GO:0005488	AT5G58070.1
Gorai.001G031200	12	5	4	1	7	7	SNARE-like superfamily protein	PF00957	PTHR21136,PTHR21136:SF5	KOG0861			GO:0016192,GO:0016021	AT5G58060.1
Gorai.001G031300	5	12	1	3	1	8	Calcineurin-like metallo-phosphoesterase superfamily protein		PTHR17695:SF1,PTHR17695					AT4G30993.2
Gorai.001G031400	1	7	6	43	2	11	homolog of yeast FIP1 [V]	PF05182						AT5G58040.1
Gorai.001G031500	14	12	4	4	97	10	Polynucleotidyl transferase, ribonuclease H-like superfamily protein	PF04857	PTHR10797	KOG0304			GO:0005634	AT2G32070.1
Gorai.001G031600	4	4	3	1	9	16		PF04641	PTHR12775	KOG3113				AT5G58020.1
Gorai.001G031700	15	15	5	5	90	90	aldehyde dehydrogenase 11A3	PF00171	PTHR11699,PTHR11699:SF29	KOG2450	1.2.1.9	K00131	GO:0016491,GO:0008152,GO:0055114	AT2G24270.4
Gorai.001G031800	4	7	25	3	0	9
Gorai.001G031900	0	6	30	1	88	1
Gorai.001G032000	9	1	11	39	19	19	SOS3-interacting protein 3	PF03822,PF00069	PTHR24345,PTHR24345:SF45	KOG0583			GO:0004672,GO:0005524,GO:0006468,GO:0007165	AT4G30960.1
Gorai.001G032100	3	3	20	42	4	4	Leucine-rich repeat protein kinase family protein	PF07714,PF00560	PTHR24420,PTHR24420:SF73	KOG1187			GO:0004672,GO:0005524,GO:0006468,GO:0005515	AT2G24230.1
Gorai.001G032200	4	1	2	2	13	13	WRKY DNA-binding protein 32	PF03106					GO:0003700,GO:0043565,GO:0006355	AT4G30935.1
Gorai.001G032300	2	5	5	5	1	3	Cytosol aminopeptidase family protein	PF02789,PF00883	PTHR11963	KOG2597	3.4.11.1	K01255	GO:0004177,GO:0006508,GO:0005622	AT4G30920.1
Gorai.001G032400	30	0	35	0	0	5	signal recognition particle receptor alpha subunit family protein	PF00448,PF04086,PF02881	PTHR11564,PTHR11564:SF8	KOG0781		K13431	GO:0005525,GO:0006614,GO:0003924,GO:0005047,GO:0006184,GO:0006886,GO:0005785	AT4G30600.1
Gorai.001G032600	2	2	7	1	65	3	alpha/beta-Hydrolases superfamily protein	PF00450	PTHR11802,PTHR11802:SF8	KOG1282			GO:0004185,GO:0006508	AT4G30610.1
Gorai.001G032700	18	5	49	7	131	1	Uncharacterised BCR, YbaB family COG0718	PF02575						AT2G24020.2
Gorai.001G032800	1	1	3	3	2	2								AT5G57910.1
Gorai.001G032900	4	1	3	6	34	5	zinc ion binding;nucleic acid binding							AT2G24030.1
Gorai.001G033000	1	1	0	2	123	24	AFG1-like ATPase family protein	PF03969	PTHR12169	KOG2383			GO:0005524	AT2G25530.1
Gorai.001G033100	3	3	11	39	19	19								AT3G45200.1
Gorai.001G033200	1	4	1	12	20	45	Integrase-type DNA-binding superfamily protein	PF00847					GO:0003700,GO:0006355	AT5G25390.2
Gorai.001G033300	53	16	12	11	0	19	phospholipase D alpha 1	PF00168,PF00614,PF12357	PTHR18896,PTHR18896:SF11	KOG1329			GO:0005515,GO:0003824,GO:0008152	AT3G15730.1
Gorai.001G033400	none	73	none	14	none	0	EIN3-binding F box protein 1	PF00646	PTHR23125,PTHR23125:SF106	KOG1947			GO:0005515	AT2G25490.1
Gorai.001G033500	47	1	12	47	1	138	Tetratricopeptide repeat (TPR)-like superfamily protein		PTHR26312:SF35,PTHR26312					AT4G32340.1
Gorai.001G033600	16	1	1	4	12	10	TPX2 (targeting protein for Xklp2) protein family	PF06886						AT4G32330.2
Gorai.001G033700	1	1	3	6	2	0								AT3G11760.1
Gorai.001G033800	3	2	10	5	4	3								AT4G32295.1
Gorai.001G033900	1	1	3	3	5	5	epsin N-terminal homology (ENTH) domain-containing protein / clathrin assembly protein-related	PF07651	PTHR22951,PTHR22951:SF1	KOG0251			GO:0005543	AT2G25430.1
Gorai.001G034000	none	7	none	15	none	12	Leucine-rich repeat transmembrane protein kinase	PF00560,PF11721	PTHR24420:SF469,PTHR24420				GO:0005515	AT1G56130.1
Gorai.001G034100	58	1	48	24	1	6
Gorai.001G034200	1	1	18	2	52	24	Nucleotide/sugar transporter family protein	PF03151	PTHR11132	KOG1444			GO:0055085	AT4G32272.1
Gorai.001G034300	4	0	11	10	19	16	Ubiquitin-like superfamily protein		PTHR14942					AT4G32270.1
Gorai.001G034400	1	3	56	2	8	28
Gorai.001G034500	7	4	41	7	0	44	Myosin heavy chain-related protein							AT4G32190.1
Gorai.001G034600	4	1	3	9	34	25	Phox (PX) domain-containing protein	PF00787	PTHR10555,PTHR10555:SF65				GO:0005515,GO:0035091,GO:0007154	AT4G32160.1
Gorai.001G034700	none	19	none	24	none	109	Bifunctional inhibitor/lipid-transfer protein/seed storage 2S albumin superfamily protein	PF00234						AT2G45180.1
Gorai.001G034800	11	1	1	4	10	10	vesicle-associated membrane protein 711		PTHR21136,PTHR21136:SF77					AT4G32150.1
Gorai.001G035000	1	1	3	3	2	5	EamA-like transporter family	PF00892	PTHR23051	KOG2765			GO:0016020	AT4G32140.1
Gorai.001G035100	12	5	2	2	7	7	Protein of unknown function (DUF2012)	PF09430	PTHR13605	KOG3306				AT2G25310.1
Gorai.001G035200	18	15	4	1	12	0
Gorai.001G035300	7	10	21	21	11	32	SET domain protein 14	PF00856	PTHR22884,PTHR22884:SF73				GO:0005515	AT3G61740.1
Gorai.001G035400	3	10	11	11	35	105
Gorai.001G035500	2	2	4	4	14	14								AT5G25265.1
Gorai.001G035600	0	18	17	17	21	21								AT5G11070.1
Gorai.001G035700	7	7	9	3	31	34	KNOTTED1-like homeobox gene 3	PF03791,PF00046,PF03790,PF03789	PTHR11850:SF15,PTHR11850	KOG0773			GO:0003700,GO:0043565,GO:0006355,GO:0003677,GO:0005634	AT5G25220.1
Gorai.001G035800	25	23	16	13	29	29	ATPase, F0 complex, subunit A protein	PF00119	PTHR11410				GO:0015078,GO:0015986,GO:0045263	ATCG00150.1
Gorai.001G035900	5	14	5	1	56	107	TRS120	PF08626	PTHR21512,PTHR21512:SF5	KOG1953				AT5G11040.1
Gorai.001G036000	2	2	1	21	3	1	aberrant lateral root formation 4	PF08568						AT5G11030.2
Gorai.001G036100	12	3	0	7	1	67
Gorai.001G036200	4	4	6	3	9	82								AT4G32030.1
Gorai.001G036300	0	3	35	19	12	75								AT4G32020.1
Gorai.001G036400	2	3	13	20	3	22	Protein kinase superfamily protein	PF00069	PTHR24420:SF449,PTHR24420	KOG1187			GO:0004672,GO:0005524,GO:0006468	AT2G25220.1
Gorai.001G036500	3	26	31	12	0	101	Integrase-type DNA-binding superfamily protein	PF00847					GO:0003700,GO:0006355	AT5G25190.1
Gorai.001G036600	9	5	32	2	6	3	Plant protein of unknown function (DUF868)	PF05910						AT5G11000.1
Gorai.001G036800	2	2	20	20	1	1	Leucine-rich repeat protein kinase family protein	PF07714	PTHR24420				GO:0004672,GO:0005524,GO:0006468	AT5G51560.1
Gorai.001G036900	7	7	5	7	51	23	chromatin remodeling factor CHD3 (PICKLE)	PF00628,PF08074,PF00271,PF06461,PF00385,PF00176,PF06465	PTHR10799,PTHR10799:SF131	KOG0384	3.6.4.12	K11643	GO:0003677,GO:0005524,GO:0003676,GO:0004386,GO:0005515,GO:0016787,GO:0008270,GO:0016818,GO:0006355,GO:0005634	AT2G25170.1
Gorai.001G037000	21	4	3	9	0	2	Polynucleotidyl transferase, ribonuclease H-like superfamily protein	PF04857	PTHR10797	KOG0304			GO:0005634	AT2G32070.1
Gorai.001G037100	1	49	9	0	0	5	stromal cell-derived factor 2-like protein precursor	PF02815	PTHR10050:SF6,PTHR10050	KOG3358			GO:0016020	AT2G25110.1
Gorai.001G037200	8	2	7	5	22	23			PTHR12663					AT4G31880.1
Gorai.001G037300	4	0	10	15	16	0
Gorai.001G037400	30	0	2	8	24	27
Gorai.001G037500	2	13	5	18	3	0	TBP-associated factor 5	PF00400,PF04494	PTHR19879	KOG0263		K03130	GO:0005515,GO:0006355,GO:0005634,GO:0030528	AT5G25150.1
Gorai.001G037600	11	11	2	4	81	14	CBL-interacting protein kinase 5	PF03822,PF00069	PTHR24343,PTHR24343:SF45	KOG0583			GO:0004672,GO:0005524,GO:0006468,GO:0007165	AT5G10930.1
Gorai.001G037700	21	none	30	none	6	none	WRKY DNA-binding protein 18	PF03106					GO:0003700,GO:0043565,GO:0006355	AT4G31800.1
Gorai.001G037800	21	21	25	15	0	102	WRKY DNA-binding protein 18	PF03106					GO:0003700,GO:0043565,GO:0006355	AT4G31800.1
Gorai.001G037900	7	7	43	20	11	71	nuclear RNA polymerase D2A	PF04567,PF04566,PF04561,PF04565,PF04563,PF04560,PF00562	PTHR20856:SF6,PTHR20856	KOG0214			GO:0003677,GO:0003899,GO:0006351,GO:0032549	AT3G23780.1
Gorai.001G038000	2	2	5	1	1	1	ATP-dependent caseinolytic (Clp) protease/crotonase family protein	PF00378	PTHR11941,PTHR11941:SF19	KOG1684	3.1.2.4	K05605	GO:0003824,GO:0008152	AT4G31810.1
Gorai.001G038100	15	11	0	2	62	1		PF08371	PTHR10185,PTHR10185:SF6	KOG3603
Gorai.001G038200	2	3	23	7	0	22	Phototropic-responsive NPH3 family protein	PF00651,PF03000	PTHR13690:SF174,PTHR13690				GO:0005515,GO:0004871,GO:0009416	AT4G31820.1
Gorai.001G038300	3	3	10	8	4	22	early nodulin-like protein 14	PF02298					GO:0005507,GO:0009055	AT2G25060.1
Gorai.001G038400	4	1	3	3	2	2	Protein phosphatase 2C family protein	PF00481	PTHR13832,PTHR13832:SF140	KOG0697	3.1.3.16	K01090	GO:0003824	AT4G31860.1
Gorai.001G038500	7	2	1	7	4	74
Gorai.001G038600	5	11	2	4	7	0	glutathione peroxidase 1	PF00255	PTHR11592	KOG1651	1.11.1.9	K00432	GO:0004602,GO:0006979,GO:0055114,GO:0016209,GO:0016491	AT2G25080.1
Gorai.001G038700	2	2	7	1	65	3	ubiquitin-specific protease 22	PF00443,PF02148	PTHR24006,PTHR24006:SF57	KOG1867	3.1.2.15	K11366	GO:0004221,GO:0006511,GO:0008270	AT5G10790.1
Gorai.001G038800	1	5	1	6	70	27	enhancer of rudimentary protein, putative	PF01133	PTHR12373	KOG1766			GO:0007049	AT5G10810.1
Gorai.001G038900	12	1	2	50	8	6								AT2G24970.1
Gorai.001G039000	3	none	32	none	1	none	VQ motif-containing protein	PF05678						AT1G80450.1
Gorai.001G039100	8	7	3	2	0	94	monogalactosyl diacylglycerol synthase 1	PF04101,PF06925	PTHR21015,PTHR21015:SF21		2.4.1.46	K03715	GO:0016758,GO:0030246,GO:0005975,GO:0030259,GO:0009247	AT4G31780.2
Gorai.001G039200	0	22	22	12	0	4	Peroxidase superfamily protein	PF00141			1.11.1.7	K00430	GO:0004601,GO:0020037,GO:0006979,GO:0055114	AT2G24800.1
Gorai.001G039300	17	4	0	1	3	6	Pentatricopeptide repeat (PPR) superfamily protein	PF01535	PTHR24015,PTHR24015:SF96					AT3G25970.1
Gorai.001G039400	3	1	4	4	12	2	Protein of unknown function (DUF1336)	PF07059						AT5G10750.1
Gorai.001G039500	15	44	12	42	0	35	CONSTANS-like 4	PF06203		KOG1601			GO:0005515	AT5G24930.1
Gorai.001G039600	26	51	42	42	35	35		PF07333
Gorai.001G039700	11	9	4	44	14	0	glutamine dumper 1							AT4G31730.1
Gorai.001G039800	18	18	3	17	0	1	TBP-associated factor II 15	PF03540	PTHR21242			K03134	GO:0006352,GO:0005634,GO:0003702	AT4G31720.1
Gorai.001G039900	27	37	33	27	0	4	glutamate receptor 2.7	PF01094,PF00060,PF00497	PTHR18966:SF6,PTHR18966	KOG1052		K05387	GO:0004970,GO:0005234,GO:0016020,GO:0005215,GO:0006810,GO:0030288	AT2G29120.1
Gorai.001G040200	4	30	3	1	60	46	ubiquitin-specific protease 19	PF00443,PF01753	PTHR24006,PTHR24006:SF250	KOG1865			GO:0004221,GO:0006511,GO:0008270	AT2G24640.1
Gorai.001G040300	2	2	1	8	1	53	Transcriptional factor B3 family protein	PF02362					GO:0003677,GO:0006355	AT2G24700.1
Gorai.001G040400	1	12	4	4	8	8	UDP-N-acetylglucosamine (UAA) transporter family	PF08449	PTHR11132	KOG1444			GO:0055085	AT4G31600.1
Gorai.001G040500	2	2	1	1	1	1	Cellulose-synthase-like C5	PF00535	PTHR10587,PTHR10587:SF18					AT4G31590.1
Gorai.001G040600	17	15	1	1	72	4	Tetratricopeptide repeat (TPR)-like superfamily protein	PF01535	PTHR24015,PTHR24015:SF153					AT1G08070.1
Gorai.001G040700	5	5	7	1	3	1	Zinc finger (CCCH-type) family protein	PF00642	PTHR12547:SF44,PTHR12547				GO:0003676,GO:0008270	AT3G19360.1
Gorai.001G040800	73	none	26	none	0	none
Gorai.001G040900	7	7	10	41	85	9	aspartate-glutamate racemase family	PF01177						AT1G15410.1
Gorai.001G041000	60	45	11	30	161	0								AT5G20100.1
Gorai.001G041100	41	41	5	0	11	9	RNA polymerase II transcription mediators	PF10156					GO:0001104,GO:0006357,GO:0016592,GO:0016455	AT5G20170.1
Gorai.001G041200	1	4	8	1	5	16								AT5G20120.1
Gorai.001G041300	8	7	0	2	37	15	Galactose oxidase/kelch repeat superfamily protein	PF01344,PF00646	PTHR24412:SF247,PTHR24412				GO:0005515	AT1G55270.1
Gorai.001G041400	2	5	1	5	1	3	Protein kinase superfamily protein	PF01633	PTHR22603:SF16,PTHR22603	KOG4720			GO:0016773	AT2G26830.1
Gorai.001G041500	4	13	3	3	2	2	Mitochondrial substrate carrier family protein	PF00153	PTHR24089,PTHR24089:SF87	KOG0752				AT4G32400.1
Gorai.001G041600	5	5	10	5	3	1	ribosome biogenesis regulatory protein (RRS1) family protein	PF04939	PTHR17602	KOG1765			GO:0042254,GO:0005634	AT2G37990.1
Gorai.001G041700	1	1	36	6	0	5								AT1G67170.1
Gorai.001G041800	1	9	11	3	0	27	Histone superfamily protein	PF00125	PTHR11426	KOG1745			GO:0003677,GO:0006334,GO:0000786	AT5G10400.1
Gorai.001G041900	11	5	9	39	0	0	Major facilitator superfamily protein	PF00854	PTHR11654:SF37,PTHR11654	KOG1237			GO:0005215,GO:0006857,GO:0016020	AT2G26690.1
Gorai.001G042000	10	2	7	5	32	23	Protein of unknown function (DUF3414)	PF11894		KOG1835		K14310		AT5G51200.1
Gorai.001G042100	0	17	6	8	5	66	SPX domain gene 2	PF03105	PTHR10783,PTHR10783:SF5	KOG1161				AT2G26660.1
Gorai.001G042200	3	3	35	42	4	35	Disease resistance-responsive (dirigent-like protein) family protein	PF03018	PTHR21495:SF11,PTHR21495					AT4G38700.1
Gorai.001G042300	1	11	0	1	16	1	Integrase-type DNA-binding superfamily protein	PF00847					GO:0003700,GO:0006355	AT1G15360.1
Gorai.001G042400	none	45	none	33	none	0	phospholipase D alpha 2	PF12357	PTHR18896,PTHR18896:SF11					AT1G52570.1
Gorai.001G042500	0	3	4	25	0	12								AT1G52565.1
Gorai.001G042600	7	8	26	5	12	4	EIN3-binding F box protein 1	PF00646	PTHR23125,PTHR23125:SF106	KOG1947			GO:0005515	AT2G25490.1
Gorai.001G042700	16	1	6	8	89	47	plant-specific transcription factor YABBY family protein	PF04690						AT2G26580.1
Gorai.001G042800	1	none	0	none	6	none	Polynucleotidyl transferase, ribonuclease H-like superfamily protein							AT5G42905.1
Gorai.001G042900	22	9	46	33	0	111	methyl-CPG-binding domain 10	PF01429					GO:0003677,GO:0005634	AT1G15340.1
Gorai.001G043000	2	7	1	1	1	28	chloroplast thylakoid lumen protein							AT4G02530.1
Gorai.001G043100	11	4	0	19	1	2	Glycosyl hydrolase superfamily protein	PF00332	PTHR16631				GO:0004553,GO:0005975	AT2G26600.1
Gorai.001G043200	19	0	33	33	111	111	Protein kinase protein with adenine nucleotide alpha hydrolases-like domain							AT3G13690.1
Gorai.001G043300	1	1	4	3	20	2	Protein of unknown function (DUF567)	PF04525						AT3G15810.1
Gorai.001G043400	2	2	7	21	1	11	Transducin family protein / WD-40 repeat family protein		PTHR14593:SF2,PTHR14593					AT3G33530.1
Gorai.001G043500	4	4	20	6	44	9	actin-related protein 6	PF00022	PTHR11937,PTHR11937:SF21	KOG0680		K11662		AT3G33520.1
Gorai.001G043600	1	1	4	3	97	136	ENTH/ANTH/VHS superfamily protein	PF07651	PTHR22951,PTHR22951:SF1	KOG0251			GO:0005543	AT4G32285.1
Gorai.001G043700	3	1	2	0	15	4	zinc finger (ubiquitin-hydrolase) domain-containing protein	PF02148,PF07576	PTHR24007:SF8,PTHR24007	KOG0804			GO:0008270	AT2G42160.1
Gorai.001G043800	none	3	none	8	none	37	beta-1,4-N-acetylglucosaminyltransferase family protein	PF04724	PTHR12224		2.4.1.144	K00737	GO:0003830,GO:0006487,GO:0016020	AT2G13290.1
Gorai.001G043900	4	4	3	49	2	13	indole-3-acetic acid inducible 29	PF02309					GO:0006355,GO:0005634	AT4G32280.1
Gorai.001G044100	23	46	16	13	29	0	maturase K	PF01824					GO:0009507,GO:0006397	ATCG00040.1
Gorai.001G044200	3	2	1	5	4	3	Protein kinase superfamily protein	PF07714	PTHR24420,PTHR24420:SF661	KOG1187			GO:0004672,GO:0005524,GO:0006468	AT3G01300.1
Gorai.001G044300	2	2	1	2	1	1	Calcium-binding EF-hand family protein	PF00036	PTHR10891,PTHR10891:SF141	KOG0027			GO:0005509,GO:0007165,GO:0005578	AT2G43290.1
Gorai.001G044500	2	8	13	1	124	1
Gorai.001G044600	none	2	none	0	none	1
Gorai.001G044700	1	1	41	3	5	5	Cellulose synthase family protein	PF03552	PTHR13301,PTHR13301:SF24		2.4.1.12	K10999	GO:0016760,GO:0030244,GO:0016020	AT5G17420.1
Gorai.001G044800	9	1	23	3	6	5	Translation initiation factor 3 protein	PF00707,PF05198	PTHR10938			K02520	GO:0003743,GO:0006413	AT4G30690.1
Gorai.001G044900	7	7	0	6	23	51	Cyclophilin-like peptidyl-prolyl cis-trans isomerase family protein	PF00160	PTHR11071:SF43,PTHR11071	KOG0546			GO:0003755,GO:0006457	AT3G63400.1
Gorai.001G045000	7	2	6	5	11	15	Cyclophilin-like peptidyl-prolyl cis-trans isomerase family protein	PF00160	PTHR11071:SF43,PTHR11071	KOG0546			GO:0003755,GO:0006457	AT4G32420.1
Gorai.001G045100	30	2	10	36	0	0
Gorai.001G045200	11	11	4	4	10	14	Protein of unknown function, DUF642	PF04862						AT5G11420.1
Gorai.001G045300	1	1	3	9	2	24	Endomembrane protein 70 protein family	PF02990	PTHR10766,PTHR10766:SF1	KOG1278			GO:0016021	AT5G35160.2
Gorai.001G045400	2	2	9	9	0	0	ABI-1-like 1							AT2G46225.2
Gorai.001G045600	4	4	16	3	5	9	Enhancer of polycomb-like transcription factor protein	PF10513	PTHR12663					AT4G32620.1
Gorai.001G045700	4	4	43	7	23	23	Protein phosphatase 2A regulatory B subunit family protein	PF01603	PTHR10257	KOG2085		K11584	GO:0008601,GO:0007165,GO:0000159	AT5G25510.1
Gorai.001G045800	10	10	8	7	0	44	TBP-associated factor 2	PF01433	PTHR15137:SF1,PTHR15137	KOG1932		K03128	GO:0008237,GO:0008270	AT1G73960.1
Gorai.001G046000	3	2	48	52	0	3	Hydroxyproline-rich glycoprotein family protein							AT3G25690.1
Gorai.001G046100	1	1	19	6	24	0	low psii accumulation2							AT5G51545.1
Gorai.001G046200	11	2	4	17	10	1	Ribosomal protein S10p/S20e family protein	PF00338	PTHR11700	KOG0900		K02969	GO:0003735,GO:0006412,GO:0005622,GO:0005840	AT3G47370.1
Gorai.001G046300	17	13	5	2	23	50	RNA-binding (RRM/RBD/RNP motifs) family protein	PF00076	PTHR24012:SF39,PTHR24012	KOG0123			GO:0003676	AT2G44710.1
Gorai.001G046400	2	5	20	1	3	1	Enolase	PF03952,PF00113	PTHR11902	KOG2670			GO:0000287,GO:0004634,GO:0006096,GO:0000015	AT2G36530.1
Gorai.001G046500	3	3	2	29	94	22	Microtubule associated protein (MAP65/ASE1) family protein	PF03479,PF03999	PTHR19321	KOG4302				AT5G51600.1
Gorai.001G046600	2	2	5	1	3	1	rRNA processing protein-related	PF05890	PTHR13028	KOG3080				AT3G22660.1
Gorai.001G046700	17	7	1	2	72	15	TRICHOME BIREFRINGENCE-LIKE 18	PF03005	PTHR13533,PTHR13533:SF3					AT4G25360.1
Gorai.001G046900	2	4	5	16	34	63	1-amino-cyclopropane-1-carboxylate synthase 12	PF00155	PTHR11751,PTHR11751:SF26	KOG0256			GO:0016740,GO:0030170,GO:0009058,GO:0016769	AT5G51690.1
Gorai.001G047000	1	1	53	21	97	64	K+ efflux antiporter 5	PF00999	PTHR16254	KOG1650			GO:0015299,GO:0006812,GO:0055085,GO:0016021	AT5G51710.2
Gorai.001G047100	38	0	10	2	38	62	Peptidase family M48 family protein	PF01435	PTHR22726				GO:0004222,GO:0006508,GO:0016020	AT5G51740.1
Gorai.001G047200	11	1	56	4	14	2	cytochrome P450, family 704, subfamily A, polypeptide 2	PF00067	PTHR24296	KOG0157			GO:0005506,GO:0009055,GO:0016705,GO:0020037,GO:0055114	AT2G45510.1
Gorai.001G047300	3	35	37	14	139	0	basic helix-loop-helix (bHLH) DNA-binding superfamily protein	PF00010					GO:0030528,GO:0006355	AT5G51780.1
Gorai.001G047400	4	4	13	22	13	16	Protein kinase superfamily protein							AT5G51800.1
Gorai.001G047500	7	4	0	9	0	2	gibberellin 20 oxidase 2	PF03171	PTHR10209,PTHR10209:SF55	KOG0143			GO:0016491,GO:0016706,GO:0055114	AT5G51810.1
Gorai.001G047600	0	52	13	31	0	49
Gorai.001G047700	12	12	3	4	8	10	B12D protein	PF06522						AT3G48140.1
Gorai.001G047800	67	24	1	2	6	13	Tetratricopeptide repeat (TPR)-like superfamily protein	PF00515	PTHR19959	KOG1840			GO:0005515	AT1G27500.1
Gorai.001G047900	33	2	5	5	3	23	C3HC zinc finger-like	PF07967	PTHR15835:SF2,PTHR15835	KOG4765			GO:0008270,GO:0005634	AT1G48950.1
Gorai.001G048000	5	15	5	11	3	13	Nucleic acid-binding, OB-fold-like protein	PF00436	PTHR10302	KOG1653		K03111	GO:0003697,GO:0006260	AT3G18580.1
Gorai.001G048200	3	3	15	26	102	19	NAC 007	PF02365					GO:0003677,GO:0006355	AT1G12260.1
Gorai.001G048300	3	9	4	13	84	21	SKU5 similar 2	PF00394,PF07731,PF07732	PTHR11709:SF18,PTHR11709	KOG1263			GO:0016491,GO:0055114,GO:0005507	AT5G51480.1
Gorai.001G048500	15	24	21	4	92	0	RPM1 interacting protein 2	PF00097	PTHR12477,PTHR12477:SF6	KOG0802				AT4G25230.1
Gorai.001G048600	32	1	8	3	66	2	phosphate starvation-induced gene 3	PF07690	PTHR11662:SF82,PTHR11662	KOG2533		K13783	GO:0022857,GO:0055085,GO:0016021	AT3G47420.1
Gorai.001G048700	28	44	27	10	134	15	peroxin 11B	PF05648	PTHR12652	KOG4186			GO:0016559,GO:0005778	AT3G47430.1
Gorai.001G048800	2	5	2	1	1	1	Dynein light chain type 1 family protein	PF01221	PTHR11886,PTHR11886:SF9	KOG3430			GO:0007017,GO:0005875	AT1G23220.1
Gorai.001G048900	3	3	1	23	21	75
Gorai.001G049000	3	61	26	46	0	161	tonoplast intrinsic protein 5;1	PF00230	PTHR19139,PTHR19139:SF53	KOG0223		K09873	GO:0005215,GO:0006810,GO:0016020	AT3G47440.1
Gorai.001G049100	1	3	13	1	46	4	structural maintenance of chromosomes 2	PF02463,PF06470	PTHR18937,PTHR18937:SF9	KOG0933			GO:0005515,GO:0005524,GO:0051276,GO:0005694	AT5G62410.1
Gorai.001G049200	3	3	11	36	19	35	C2H2-like zinc finger protein							AT5G61470.1
Gorai.001G049300	3	3	42	11	35	61	C2H2-like zinc finger protein		PTHR26374,PTHR26374:SF459					AT5G61470.1
Gorai.001G049500	9	9	5	0	46	47	Leucine-rich repeat protein kinase family protein	PF00069,PF00560,PF08263	PTHR24420:SF883,PTHR24420	KOG1187			GO:0004672,GO:0005524,GO:0006468,GO:0005515	AT5G61480.1
Gorai.001G049600	5	11	17	4	1	1	Ribosomal protein L23/L15e family protein	PF00827	PTHR11847	KOG1678		K02877	GO:0003735,GO:0006412,GO:0005840,GO:0005622	AT4G16720.1
Gorai.001G049700	1	7	6	23	2	75	RNA polymerase III RPC4	PF05132	PTHR13408	KOG3122			GO:0003677,GO:0003899,GO:0006383,GO:0005666	AT5G09380.1
Gorai.001G049800	15	4	12	30	4	35	Integrase-type DNA-binding superfamily protein	PF00847					GO:0003700,GO:0006355	AT2G44940.1
Gorai.001G050000	10	4	13	3	38	0	GroES-like zinc-binding alcohol dehydrogenase family protein	PF00107,PF08240	PTHR11695,PTHR11695:SF31	KOG1197	1.6.5.5	K00344	GO:0008270,GO:0016491,GO:0055114	AT5G61510.1
Gorai.001G050100	5	11	1	4	1	81	GroES-like zinc-binding alcohol dehydrogenase family protein	PF00107,PF08240	PTHR11695,PTHR11695:SF31	KOG1197	1.6.5.5	K00344	GO:0008270,GO:0016491,GO:0055114	AT5G61510.1
Gorai.001G050200	28	37	12	32	0	0	Major facilitator superfamily protein	PF00083	PTHR24063,PTHR24063:SF210	KOG0254			GO:0022857,GO:0055085,GO:0016021	AT5G61520.1
Gorai.001G050300	2	3	7	10	3	4	U-box domain-containing protein kinase family protein	PF00069,PF04564,PF00582	PTHR24420,PTHR24420:SF447	KOG1187			GO:0004672,GO:0005524,GO:0006468,GO:0006950,GO:0004842,GO:0016567,GO:0000151	AT4G25160.1
Gorai.001G050400	17	1	0	19	117	36	HAD superfamily, subfamily IIIB acid phosphatase	PF03767	PTHR11726,PTHR11726:SF1				GO:0003993	AT4G25150.1
Gorai.001G050500	15	22	28	37	1	0	receptor lectin kinase	PF00069,PF00139	PTHR24420,PTHR24420:SF435	KOG1187			GO:0004672,GO:0005524,GO:0006468,GO:0005488	AT2G37710.1
Gorai.001G050700	2	42	31	11	1	106	F-box family protein	PF00646					GO:0005515	AT5G07610.1
Gorai.001G050800	5	5	7	10	39	1	ubiquinol-cytochrome C chaperone family protein	PF03981	PTHR12184	KOG2873				AT5G51220.1
Gorai.001G050900	10	33	5	5	11	23	ARM repeat superfamily protein	PF08146,PF12397	PTHR13457	KOG1837		K14550		AT3G06530.1
Gorai.001G051000	1	1	4	15	8	0	phosphofructokinase 4	PF00365	PTHR13697	KOG2440	2.7.1.11	K00850	GO:0003872,GO:0006096,GO:0005945	AT5G61580.1
Gorai.001G051100	1	0	1	2	20	14	Integrase-type DNA-binding superfamily protein	PF00847					GO:0003700,GO:0006355	AT5G51190.1
Gorai.001G051200	34	2	3	4	31	14	Integrase-type DNA-binding superfamily protein	PF00847					GO:0003700,GO:0006355	AT5G51190.1
Gorai.001G051300	56	1	3	33	8	111	ethylene responsive element binding factor 1	PF00847					GO:0003700,GO:0006355	AT4G17500.1
Gorai.001G051400	9	9	6	6	27	27	oleosin 1	PF01277					GO:0012511,GO:0016021	AT4G25140.1
Gorai.001G051500	10	10	2	21	26	32	VEFS-Box of polycomb protein	PF09733	PTHR22597	KOG2350				AT5G51230.1
Gorai.001G051600	2	8	1	20	1	3	S-adenosyl-L-methionine-dependent methyltransferases superfamily protein	PF10672	PTHR11061				GO:0016740,GO:0008168,GO:0031167,GO:0008276,GO:0006479,GO:0005737	AT1G54310.2
Gorai.001G051700	none	42	none	24	none	7	KAR-UP oxidoreductase 1	PF03171	PTHR10209,PTHR10209:SF55	KOG0143			GO:0016491,GO:0016706,GO:0055114	AT5G07480.1
Gorai.001G051800	1	1	3	3	80	84								AT5G61670.1
Gorai.001G051900	3	43	2	10	2	4
Gorai.001G052000	3	3	5	5	22	4	chromomethylase 3	PF01426,PF00145,PF00385	PTHR10629		2.1.1.37	K00558	GO:0003677,GO:0006306	AT1G69770.1
Gorai.001G052100	6	2	0	2	32	4		PF09749	PTHR13522	KOG3102				AT5G51170.1
Gorai.001G052200	14	4	3	3	0	2	Mitochondrial import inner membrane translocase subunit Tim17/Tim22/Tim23 family protein	PF02466	PTHR12459	KOG1398			GO:0015031,GO:0008565,GO:0005743	AT5G51150.1
Gorai.001G052300	1	16	4	4	17	17	Chlorophyll A-B binding family protein	PF00504						AT4G17600.1
Gorai.001G052400	0	1	2	2	1	6	SOH1 family protein	PF05669	PTHR13186	KOG4086			GO:0001104,GO:0006355,GO:0016592,GO:0016455	AT5G19910.1
Gorai.001G052500	5	5	0	0	0	1	polyadenylate-binding protein 1	PF00076	PTHR23365	KOG4209		K14396	GO:0003676	AT5G51120.1
Gorai.001G052600	2	8	5	6	15	82	Transcriptional coactivator/pterin dehydratase	PF01329	PTHR12599	KOG4073			GO:0008124,GO:0006729	AT5G51110.1
Gorai.001G052700	2	3	23	14	58	0	Fe superoxide dismutase 2	PF02777,PF00081	PTHR11404,PTHR11404:SF8	KOG0876			GO:0004784,GO:0046872,GO:0006801,GO:0055114	AT5G51100.1
Gorai.001G052800	3	0	8	1	73	43	Transducin family protein / WD-40 repeat family protein	PF00400	PTHR19918	KOG0305			GO:0005515	AT4G33270.1
Gorai.001G052900	2	0	0	29	34	0	FRIGIDA-like protein	PF07899						AT4G00650.1
Gorai.001G053000	15	1	3	0	117	25	Clp ATPase	PF02861,PF00004,PF07724,PF10431	PTHR11638:SF12,PTHR11638	KOG1051			GO:0005524,GO:0019538,GO:0016887	AT5G51070.1
Gorai.001G053100	7	1	0	2	0	16	forkhead-associated domain-containing protein / FHA domain-containing protein	PF08797,PF00498,PF06087	PTHR12415	KOG2031			GO:0005515,GO:0008081,GO:0006281,GO:0005634,GO:0003676,GO:0008270,GO:0016818	AT5G07400.1
Gorai.001G053200	7	43	35	36	12	0
Gorai.001G053300	4	8	3	4	9	87	NADPH/respiratory burst oxidase protein D	PF08022,PF08414,PF08030,PF01794	PTHR11972:SF5,PTHR11972	KOG0039			GO:0005506,GO:0009055,GO:0016491,GO:0050660,GO:0016021,GO:0055114,GO:0004601,GO:0050664	AT5G51060.1
Gorai.001G053400	2	0	5	1	0	3	calnexin 1	PF00262	PTHR11073	KOG0675		K08054	GO:0005509	AT5G61790.1
Gorai.001G053500	5	2	5	1	3	1	Mitochondrial substrate carrier family protein	PF00153	PTHR24089:SF34,PTHR24089	KOG0036				AT5G51050.1
Gorai.001G053600	none	21	none	22	none	83		PF07712						AT5G61820.1
Gorai.001G053700	2	5	20	2	1	1		PF03937	PTHR12469,PTHR12469:SF1	KOG3326				AT5G51040.1
Gorai.001G053800	2	2	1	1	1	1	Sec14p-like phosphatidylinositol transfer family protein	PF03765,PF00650	PTHR10174	KOG1471				AT1G01630.1
Gorai.001G053900	27	27	10	5	3	0	floral meristem identity control protein LEAFY (LFY)	PF01698					GO:0003677,GO:0006355	AT5G61850.1
Gorai.001G054000	5	5	10	1	3	1								AT5G61865.1
Gorai.001G054100	10	2	1	2	4	3	transducin family protein / WD-40 repeat family protein	PF00400	PTHR22850,PTHR22850:SF45	KOG0265			GO:0005515	AT5G50970.1
Gorai.001G054200	10	4	2	7	15	6	MEI2-like protein 1	PF04059,PF00076	PTHR24011,PTHR24011:SF200	KOG4660			GO:0003676	AT5G61960.1
Gorai.001G054300	5	1	1	4	7	66	Histone superfamily protein		PTHR22980					AT5G50930.1
Gorai.001G054400	3	3	1	2	4	15	magnesium-protoporphyrin IX methyltransferase	PF07109,PF05175	PTHR10108,PTHR10108:SF59	KOG1270	2.1.1.11	K03428	GO:0008168,GO:0046406,GO:0015979,GO:0015995,GO:0008152	AT4G25080.1
Gorai.001G054500	5	5	7	8	1	3	signal recognition particle-related / SRP-related		PTHR12860	KOG2460		K03107		AT5G61970.1
Gorai.001G054600	4	4	41	35	2	154	auxin response factor 2	PF02309,PF06507,PF02362					GO:0006355,GO:0005634,GO:0003677,GO:0009725	AT5G62000.1
Gorai.001G054700	3	4	6	6	51	2	CLPC homologue 1	PF02861,PF02151,PF00004,PF07724,PF10431	PTHR11638:SF19,PTHR11638	KOG1051		K03696	GO:0005524,GO:0008134,GO:0006355,GO:0005515,GO:0019538,GO:0016887,GO:0006289,GO:0004518,GO:0003677	AT5G50920.1
Gorai.001G054800	66	19	30	14	0	132	phosphate transporter 3;2	PF00153	PTHR24089:SF22,PTHR24089	KOG0767				AT3G48850.1
Gorai.001G054900	9	4	14	14	108	12	basic helix-loop-helix (bHLH) DNA-binding superfamily protein	PF00010	PTHR12565,PTHR12565:SF7				GO:0030528,GO:0006355	AT5G50915.1
Gorai.001G055000	7	3	9	40	2	0	Sterile alpha motif (SAM) domain-containing protein	PF07647	PTHR10627	KOG4374			GO:0005515	AT3G48800.1
Gorai.001G055100	3	5	10	2	33	33	Ribosomal L32p protein family	PF01783					GO:0003735,GO:0006412,GO:0015934	AT1G26740.1
Gorai.001G055200	7	3	49	49	2	2	ARM repeat superfamily protein	PF00514	PTHR23315				GO:0005515	AT5G50900.1
Gorai.001G055300	8	8	2	5	15	0	Protein kinase superfamily protein	PF00069	PTHR24056,PTHR24056:SF77	KOG0600			GO:0004672,GO:0005524,GO:0006468	AT5G50860.1
Gorai.001G055400	1	0	6	14	2	36
Gorai.001G055500	1	1	41	6	5	5	homolog of Medicago truncatula MTN3	PF03083	PTHR10791,PTHR10791:SF6	KOG1623			GO:0016021	AT5G23660.1
Gorai.001G055600	9	1	9	6	13	5	Nodulin MtN3 family protein	PF03083	PTHR10791	KOG1623			GO:0016021	AT5G50790.1
Gorai.001G055700	9	1	22	36	6	141	Nodulin MtN3 family protein	PF03083	PTHR10791	KOG1623			GO:0016021	AT5G50790.1
Gorai.001G055800	0	13	5	5	3	50	glutamate-1-semialdehyde 2,1-aminomutase 2	PF00202	PTHR11986,PTHR11986:SF5	KOG1401	5.4.3.8	K01845	GO:0008483,GO:0030170	AT3G48730.1
Gorai.001G055900	3	3	18	15	37	1	Histidine kinase-, DNA gyrase B-, and HSP90-like ATPase family protein	PF02518	PTHR23336,PTHR23336:SF7	KOG1845			GO:0005524	AT4G24970.1
Gorai.001G056000	2	none	28	none	133	none	Calcium-binding EF-hand family protein		PTHR10891,PTHR10891:SF148					AT4G27280.1
Gorai.001G056100	1	1	4	4	8	8	SAUR-like auxin-responsive protein family	PF02519				K14488		AT5G50760.1
Gorai.001G056200	2	3	16	5	74	22	DEK domain-containing chromatin associated protein	PF08766	PTHR13468	KOG2266				AT3G48710.1
Gorai.001G056300	5	5	2	1	33	1	Ribosomal protein L7Ae/L30e/S12e/Gadd45 family protein	PF01248	PTHR23105:SF1,PTHR23105	KOG3166		K02936		AT3G62870.1
Gorai.001G056400	13	13	48	48	129	129	nodulin MtN21 /EamA-like transporter family protein							AT3G53210.1
Gorai.001G056500	4	1	23	23	75	25	ACT domain repeat 4	PF01842	PTHR13734:SF23,PTHR13734				GO:0016597,GO:0008152	AT1G69040.2
Gorai.001G056700	17	3	1	1	72	1	Domain of unknown function (DUF1767)	PF08585	PTHR14790:SF1,PTHR14790					AT5G63540.1
Gorai.001G056800	45	0	15	6	2	2	hydroxysteroid dehydrogenase 6	PF00106	PTHR24322,PTHR24322:SF34	KOG1205			GO:0016491,GO:0008152	AT5G50770.1
Gorai.001G056900	2	9	9	7	0	52	hydroxysteroid dehydrogenase 6	PF00106	PTHR24322,PTHR24322:SF34	KOG1205			GO:0016491,GO:0008152	AT5G50770.1
Gorai.001G057000	1	1	6	6	5	5	HVA22 homologue E	PF03134	PTHR12300,PTHR12300:SF11					AT5G50720.1
Gorai.001G057100	3	3	35	35	13	22	farnesylated protein 3	PF00403	PTHR22814,PTHR22814:SF52	KOG1603			GO:0046872,GO:0030001	AT5G63530.2
Gorai.001G057200	6	0	1	1	1	1	pleiotropic drug resistance 12	PF01061,PF08370,PF00005	PTHR19241,PTHR19241:SF10	KOG0065			GO:0005524,GO:0016887,GO:0016020	AT1G15520.1
Gorai.001G057300	6	6	12	12	41	41	Protein of unknown function (DUF616)	PF04765						AT5G42660.1
Gorai.001G057400	1	2	1	1	6	1	pleiotropic drug resistance 12	PF01061,PF08370,PF00005	PTHR19241,PTHR19241:SF10	KOG0065			GO:0005524,GO:0016887,GO:0016020	AT1G15520.1
Gorai.001G057500	3	3	5	8	4	22								AT5G13090.1
Gorai.001G057600	none	11	none	4	none	10	WRKY DNA-binding protein 75	PF03106					GO:0003700,GO:0043565,GO:0006355	AT5G13080.1
Gorai.001G057700	none	70	none	5	none	3	Squamosa promoter-binding protein-like (SBP domain) transcription factor family protein	PF03110					GO:0003677,GO:0005634	AT5G50670.1
Gorai.001G057800	14	14	17	2	7	1	gamma carbonic anhydrase like 1		PTHR13061	KOG3121				AT5G63510.1
Gorai.001G057900	1	2	51	13	45	124	Protein of unknown function (DUF 3339)	PF11820						AT3G48660.1
Gorai.001G058000	2	2	1	1	1	1	molybdenum cofactor sulfurase (LOS5) (ABA3)	PF03473					GO:0003824,GO:0030151,GO:0030170	AT1G16540.1
Gorai.001G058100	1	1	3	4	2	8	CBS / octicosapeptide/Phox/Bemp1 (PB1) domains-containing protein	PF00571,PF00564	PTHR11911,PTHR11911:SF13				GO:0005515	AT5G50530.1
Gorai.001G058200	2	3	4	4	1	0	non-specific phospholipase C6	PF04185			3.1.4.3	K01114	GO:0016788	AT3G48610.1
Gorai.001G058300	5	6	2	1	7	55								AT5G63480.1
Gorai.001G058400	1	15	2	7	24	44	DNAJ heat shock N-terminal domain-containing protein	PF00226,PF11926	PTHR25040:SF41,PTHR25040				GO:0031072	AT5G53150.1
Gorai.001G058500	5	2	5	5	3	3	nuclear factor Y, subunit C1	PF00808	PTHR10252	KOG1657			GO:0003677,GO:0043565,GO:0005622	AT3G48590.1
Gorai.001G058600	21	56	52	25	1	0	cytochrome P450, family 87, subfamily A, polypeptide 2	PF00067	PTHR24286,PTHR24286:SF19	KOG0157			GO:0005506,GO:0009055,GO:0016705,GO:0020037,GO:0055114	AT1G12740.1
Gorai.001G058700	1	1	3	8	5	30	Protein of unknown function (DUF579)	PF04669						AT4G24910.1
Gorai.001G058800	10	10	1	18	57	73								AT4G24900.1
Gorai.001G058900	22	54	22	48	4	3								AT3G48550.1
Gorai.001G059100	9	1	10	51	45	45	HCP-like superfamily protein with MYND-type zinc finger	PF08238,PF01753	PTHR12298				GO:0008270	AT1G67340.1
Gorai.001G059200	11	13	18	2	53	1	SNF1-related protein kinase regulatory subunit gamma 1	PF00571	PTHR13780	KOG1764			GO:0005515	AT3G48530.1
Gorai.001G059300	11	11	19	4	0	17	Cysteine proteinases superfamily protein	PF02902	PTHR12438:SF7,PTHR12438				GO:0008234,GO:0006508	AT3G48480.1
Gorai.001G059400	2	14	21	1	1	39	AAA-type ATPase family protein	PF00498,PF00004	PTHR23074,PTHR23074:SF20	KOG0737			GO:0005524,GO:0005515,GO:0009378,GO:0006281,GO:0006310	AT4G02480.1
Gorai.001G059500	3	2	15	0	1	1	calmodulin like 37	PF00036	PTHR10891,PTHR10891:SF141	KOG0027		K13448		AT5G42380.1
Gorai.001G059600	2	8	8	7	23	1	RNA-metabolising metallo-beta-lactamase family protein	PF00753,PF07521	PTHR11203:SF24,PTHR11203	KOG1137			GO:0016787	AT5G63420.1
Gorai.001G059700	3	18	10	29	23	0	cyclopropyl isomerase				5.5.1.9	K08246		AT5G50375.1
Gorai.001G059800	3	10	45	8	0	32
Gorai.001G059900	2	2	5	5	3	3	arginosuccinate synthase family	PF00764	PTHR11587	KOG1706	6.3.4.5	K01940	GO:0004055,GO:0005524,GO:0006526	AT4G24830.1
Gorai.001G060000	7	3	1	2	57	31	P-loop containing nucleoside triphosphate hydrolases superfamily protein	PF00406	PTHR23359	KOG3078			GO:0005524,GO:0019205,GO:0006139	AT3G01820.1
Gorai.001G060100	10	7	2	3	13	2	Leucine-rich repeat protein kinase family protein	PF07714,PF00560	PTHR24420,PTHR24420:SF465	KOG1187			GO:0004672,GO:0005524,GO:0006468,GO:0005515	AT5G14210.1
Gorai.001G060200	2	10	2	5	3	3	homolog of nucleolar protein NOP56	PF08060,PF08156,PF01798	PTHR10894	KOG2573		K14564		AT1G56110.1
Gorai.001G060300	3	18	1	5	4	4	adenylate kinase 1	PF00406,PF05191	PTHR23359	KOG3078	2.7.4.3	K00939	GO:0005524,GO:0019205,GO:0006139,GO:0004017	AT5G63400.1
Gorai.001G060400	20	9	30	47	0	138	O-fucosyltransferase family protein	PF10250						AT5G63390.1
Gorai.001G060500	6	12	1	1	7	59	Uncharacterised protein family (UPF0041)	PF03650	PTHR14154:SF3,PTHR14154	KOG1590				AT5G20090.1
Gorai.001G060600	none	43	none	30	none	4	Subtilase family protein	PF05922,PF00082,PF02225	PTHR10795,PTHR10795:SF17				GO:0004252,GO:0006508,GO:0042802,GO:0043086	AT5G67360.1
Gorai.001G060700	4	3	6	1	9	4	AMP-dependent synthetase and ligase family protein	PF00501	PTHR24096,PTHR24096:SF43	KOG1176			GO:0003824,GO:0008152	AT5G63380.1
Gorai.001G060800	10	10	3	21	11	32	Protein kinase superfamily protein	PF00069	PTHR24056,PTHR24056:SF86	KOG0663			GO:0004672,GO:0005524,GO:0006468	AT1G67580.1
Gorai.001G060900	1	9	6	10	5	95	malate synthase	PF01274	PTHR21631:SF1,PTHR21631	KOG1261	2.3.3.9	K01638	GO:0004474,GO:0006097,GO:0016830,GO:0006725	AT5G03860.1
Gorai.001G061000	3	26	8	28	60	0								AT5G50360.1
Gorai.001G061100	10	15	1	23	4	38	Nucleic acid-binding, OB-fold-like protein							AT3G48500.1
Gorai.001G061200	2	1	21	2	40	84	Protein kinase superfamily protein	PF03109	PTHR10566	KOG1235		K08869		AT5G50330.1
Gorai.001G061300	0	2	10	2	1	1	Ribosomal protein S21 family protein	PF01165					GO:0003735,GO:0006412,GO:0005622,GO:0005840	AT3G27160.1
Gorai.001G061400	10	4	0	6	0	31	embryo defective 2423	PF10193	PTHR15830:SF5,PTHR15830					AT3G48470.1
Gorai.001G061500	13	2	16	18	89	37	radical SAM domain-containing protein / GCN5-related N-acetyltransferase (GNAT) family protein		PTHR11135					AT5G50320.1
Gorai.001G061600	10	10	54	54	0	0	C2H2-like zinc finger protein		PTHR21385					AT5G63280.1
Gorai.001G061700	47	46	30	4	6	0	Xanthine/uracil permease family protein	PF00860	PTHR11119,PTHR11119:SF9				GO:0005215,GO:0006810,GO:0055085,GO:0016020	AT5G50300.1
Gorai.001G061800	0	2	8	2	0	58	Zinc finger C-x8-C-x5-C-x3-H type family protein	PF00642	PTHR12506,PTHR12506:SF11	KOG1677			GO:0003676,GO:0008270	AT3G48440.1
Gorai.001G061900	8	2	5	7	3	22	relative of early flowering 6	PF02375,PF02373	PTHR10694,PTHR10694:SF8				GO:0005515	AT3G48430.1
Gorai.001G062000	1	1	8	4	30	128	MA3 domain-containing protein	PF02847	PTHR12626	KOG0403				AT5G63190.1
Gorai.001G062100	8	4	5	41	4	9	Pentatricopeptide repeat (PPR) superfamily protein	PF01535	PTHR24015					AT5G50280.1
Gorai.001G062200	2	2	1	1	1	1	AAA-type ATPase family protein	PF12169,PF00004	PTHR11669	KOG0989			GO:0005524,GO:0003887	AT4G24790.1
Gorai.001G062300	2	3	5	19	3	15	BTB and TAZ domain protein 1	PF02135,PF00651	PTHR24413,PTHR24413:SF192	KOG1778	1.14.-.-	K00517	GO:0005515,GO:0003712,GO:0004402,GO:0008270,GO:0006355,GO:0005634	AT5G63160.1
Gorai.001G062400	13	7	10	1	4	4	Pectin lyase-like superfamily protein	PF00544			4.2.2.2	K01728		AT5G63180.1
Gorai.001G062500	none	8	none	1	none	12
Gorai.001G062600	3	9	39	5	69	33	peptidemethionine sulfoxide reductase 1	PF01625	PTHR10173:SF6,PTHR10173	KOG1635			GO:0016671,GO:0019538,GO:0055114	AT5G61640.1
Gorai.001G062700	14	5	5	5	3	1	alpha/beta-Hydrolases superfamily protein	PF00326	PTHR12277:SF8,PTHR12277	KOG1552			GO:0008236,GO:0006508,GO:0016787	AT4G24760.1
Gorai.001G062900	5	5	2	1	33	1		PF08213						AT5G63150.1
Gorai.001G063000	2	5	1	4	1	7	protein-l-isoaspartate methyltransferase 1	PF01135	PTHR11579	KOG1661			GO:0004719,GO:0006464	AT3G48330.1
Gorai.001G063100	2	13	2	7	1	64	31-kDa RNA binding protein	PF00076	PTHR24012,PTHR24012:SF56	KOG0131			GO:0003676	AT4G24770.1
Gorai.001G063200	4	1	25	14	12	20								AT5G14410.1
Gorai.001G063300	25	none	16	none	29	none	ribosomal protein L20	PF00453	PTHR10986				GO:0003735,GO:0019843,GO:0006412,GO:0005622,GO:0005840	ATCG00660.1
Gorai.001G063500	2	5	5	1	23	3	31-kDa RNA binding protein	PF00076	PTHR24012,PTHR24012:SF56	KOG0131			GO:0003676	AT4G24770.1
Gorai.001G063600	2	4	4	3	14	2	cytochrome P450, family 71, subfamily B, polypeptide 19	PF00067	PTHR24298:SF44,PTHR24298	KOG0156			GO:0005506,GO:0009055,GO:0016705,GO:0020037,GO:0055114	AT3G26170.1
Gorai.001G063700	4	10	1	4	37	59
Gorai.001G063800	2	10	7	21	40	40	FUS3-complementing gene 2	PF00069	PTHR24058:SF30,PTHR24058	KOG0671	2.7.12.1	K08287	GO:0004672,GO:0005524,GO:0006468	AT4G24740.1
Gorai.001G063900	10	13	10	4	6	0	cytochrome P450, family 71, subfamily B, polypeptide 2	PF00067	PTHR24298:SF44,PTHR24298	KOG0156			GO:0005506,GO:0009055,GO:0016705,GO:0020037,GO:0055114	AT1G13080.1
Gorai.001G064000	2	9	5	2	23	6	quinolinate synthase	PF02445,PF02657	PTHR12735,PTHR12735:SF3		2.5.1.72	K03517	GO:0008987,GO:0009435	AT5G50210.1
Gorai.001G064100	1	1	9	14	2	20	Calcineurin-like metallo-phosphoesterase superfamily protein							AT4G24730.4
Gorai.001G064300	2	2	1	2	3	1	Ribosomal protein L19 family protein	PF01245	PTHR15680,PTHR15680:SF2				GO:0003735,GO:0006412,GO:0005622,GO:0005840	AT4G11630.1
Gorai.001G064400	2	11	2	1	1	1	with no lysine (K) kinase 3	PF00069	PTHR13902:SF36,PTHR13902	KOG0584			GO:0004672,GO:0005524,GO:0006468	AT3G48260.1
Gorai.001G064500	2	2	1	1	1	1	Leucine-rich repeat (LRR) family protein	PF00560	PTHR24420	KOG0617			GO:0005515	AT1G13230.1
Gorai.001G064600	2	2	1	5	1	3	P-loop containing nucleoside triphosphate hydrolases superfamily protein	PF00271,PF00270	PTHR24031,PTHR24031:SF23	KOG0342	3.6.4.13	K13179	GO:0003676,GO:0005524,GO:0008026,GO:0004386	AT3G18600.1
Gorai.001G064700	3	3	0	6	78	82	nuclear factor Y, subunit B13	PF00808	PTHR11064,PTHR11064:SF8	KOG0871			GO:0043565,GO:0005622	AT5G23090.1
Gorai.001G064800	7	2	3	18	11	53	ATPase E1-E2 type family protein / haloacid dehalogenase-like hydrolase family protein	PF00702,PF00122	PTHR24092:SF18,PTHR24092	KOG0206			GO:0000166,GO:0046872,GO:0003824,GO:0008152	AT1G68710.1
Gorai.001G065100	3	3	22	5	4	4	calcium sensing receptor	PF00581						AT5G23060.1
Gorai.001G065200	53	45	45	26	0	0	tetraspanin11	PF00335	PTHR19282,PTHR19282:SF137				GO:0016021	AT1G18520.1
Gorai.001G065300	15	25	37	22	0	6	tetraspanin8	PF00335	PTHR19282,PTHR19282:SF69				GO:0016021	AT2G23810.1
Gorai.001G065400	63	11	31	13	0	55	Protein of unknown function (DUF1637)	PF07847	PTHR22966	KOG4281			GO:0047800,GO:0055114	AT1G18490.1
Gorai.001G065600	9	9	3	6	27	27	strictosidine synthase 3	PF03088	PTHR10426:SF5,PTHR10426	KOG1520	4.3.3.2	K01757	GO:0016844,GO:0009058	AT1G74000.1
Gorai.001G065700	2	5	14	48	10	1	strictosidine synthase 2	PF03088	PTHR10426:SF5,PTHR10426	KOG1520			GO:0016844,GO:0009058	AT1G74020.1
Gorai.001G065800	5	5	10	5	1	3	Ribosomal protein L7Ae/L30e/S12e/Gadd45 family protein	PF01248	PTHR23105,PTHR23105:SF12	KOG3167		K11129		AT5G08180.1
Gorai.001G065900	14	5	0	23	0	81	porphyromonas-type peptidyl-arginine deiminase family protein	PF04371			3.5.3.12	K10536		AT5G08170.1
Gorai.001G066000	5	5	1	2	7	1	serine/threonine protein kinase 3	PF00069	PTHR22967	KOG2345			GO:0004672,GO:0005524,GO:0006468	AT5G08160.1
Gorai.001G066100	5	5	2	4	7	0	LAG1 longevity assurance homolog 3	PF03798	PTHR12560	KOG1607			GO:0016021	AT1G13580.2
Gorai.001G066200	7	7	9	3	15	2	NB-ARC domain-containing disease resistance protein	PF00931	PTHR23155	KOG4658			GO:0043531,GO:0006915,GO:0005524	AT4G26090.1
Gorai.001G066400	1	1	4	1	2	16	RING/U-box protein	PF00628	PTHR15242				GO:0005515	AT3G05670.1
Gorai.001G066500	1	24	8	3	30	5	phosphoinositide 4-kinase gamma 7	PF00454	PTHR15245,PTHR15245:SF11	KOG2381			GO:0016773	AT2G03890.1
Gorai.001G066600	1	1	41	4	5	30	O-fucosyltransferase family protein	PF10250						AT5G15740.1
Gorai.001G066700	0	12	16	16	5	64
Gorai.001G066800	5	2	1	1	1	1	BSD domain-containing protein	PF03909						AT1G26300.1
Gorai.001G066900	2	2	8	1	32	38	Sterile alpha motif (SAM) domain-containing protein	PF00536	PTHR10627,PTHR10627:SF11				GO:0005515	AT5G23680.1
Gorai.001G067000	2	4	2	2	1	13	OBF binding protein 4	PF02701					GO:0003677,GO:0008270,GO:0006355	AT5G60850.1
Gorai.001G067100	5	11	1	1	1	10	18S pre-ribosomal assembly protein gar2-related							AT2G03810.1
Gorai.001G067300	1	1	2	0	70	123	movement protein binding protein 2C							AT5G08120.1
Gorai.001G067400	3	1	35	3	71	2	ketol-acid reductoisomerase	PF01450,PF07991	PTHR21371,PTHR21371:SF4				GO:0004455,GO:0009082,GO:0055114,GO:0008652,GO:0016491	AT3G58610.1
Gorai.001G067500	3	1	54	51	88	6	sulfotransferase 16	PF00685	PTHR11783,PTHR11783:SF1	KOG1584			GO:0008146	AT1G74100.1
Gorai.001G067600	3	1	15	13	15	21	Ribosomal protein S24/S35, mitochondrial							AT4G21460.1
Gorai.001G067700	1	1	6	9	5	5	RING/U-box superfamily protein	PF00097	PTHR22937,PTHR22937:SF9	KOG1493				AT1G73760.1
Gorai.001G067800	5	5	5	8	1	53	UDP-Glycosyltransferase superfamily protein	PF04101	PTHR21015:SF22,PTHR21015				GO:0016758,GO:0030246,GO:0005975,GO:0030259	AT1G73740.1
Gorai.001G067900	2	2	5	7	3	3	UDP-Glycosyltransferase superfamily protein	PF04101,PF03033	PTHR21015:SF22,PTHR21015		2.4.1.227	K02563	GO:0016758,GO:0005975,GO:0030259,GO:0030246	AT1G73740.1
Gorai.001G068000	1	45	13	11	55	20	Octicosapeptide/Phox/Bem1p family protein	PF00564					GO:0005515	AT3G18230.1
Gorai.001G068100	2	12	2	4	1	10	Protein of unknown function, DUF599	PF04654						AT3G18215.1
Gorai.001G068200	17	13	2	2	72	50	Vacuolar protein sorting-associated protein 26	PF03643	PTHR12233,PTHR12233:SF2	KOG2717			GO:0007034,GO:0030904	AT1G48550.1
Gorai.001G068300	2	2	1	2	1	1	white-brown complex homolog protein 11	PF01061,PF00005	PTHR19241,PTHR19241:SF20	KOG0061			GO:0005524,GO:0016887,GO:0016020	AT1G17840.1
Gorai.001G068500	5	5	10	17	1	7		PF05160
Gorai.001G068600	53	3	42	11	35	35	spermidine synthase 1	PF01564	PTHR11558,PTHR11558:SF11	KOG1562			GO:0003824	AT1G23820.1
Gorai.001G068700	4	4	9	9	13	13	Homeodomain-like superfamily protein	PF00249					GO:0003677	AT5G16560.1
Gorai.001G068800	4	1	1	12	20	6
Gorai.001G068900	17	2	1	1	62	1	annexin 5	PF00191	PTHR10502:SF10,PTHR10502	KOG0819			GO:0005509,GO:0005544	AT1G68090.1
Gorai.001G069000	10	26	0	33	73	0	Dihydroxyacetone kinase	PF02733,PF02734	PTHR10854	KOG2426			GO:0004371,GO:0006071	AT3G17770.1
Gorai.001G069100	5	5	1	5	1	3	Ribosomal L28 family	PF00830	PTHR13528	KOG3278			GO:0003735,GO:0006412,GO:0005622,GO:0005840	AT4G31460.1
Gorai.001G069200	2	5	7	1	39	81	FKBP-type peptidyl-prolyl cis-trans isomerase family protein	PF00254	PTHR10516,PTHR10516:SF71	KOG0543			GO:0006457	AT3G21640.1
Gorai.001G069300	10	2	2	1	1	1
Gorai.001G069400	2	1	2	2	58	6								AT1G73470.1
Gorai.001G069500	4	4	8	2	11	15	Protein kinase superfamily protein	PF00069	PTHR24058,PTHR24058:SF21	KOG0667			GO:0004672,GO:0005524,GO:0006468	AT1G73460.1
Gorai.001G069700	28	0	7	4	64	68	Homeodomain-like superfamily protein	PF00249	PTHR12802,PTHR12802:SF27				GO:0003677	AT1G18330.2
Gorai.001G069800	2	2	5	2	3	1	receptor for activated C kinase 1B	PF00400	PTHR19868	KOG0279			GO:0005515	AT1G48630.1
Gorai.001G069900	69	1	30	8	0	30	Calcium-dependent lipid-binding (CaLB domain) family protein	PF00168	PTHR26357,PTHR26357:SF5	KOG1030			GO:0005515	AT3G17980.1
Gorai.001G070000	2	0	7	2	40	4								AT1G48580.1
Gorai.001G070200	0	none	15	none	1	none	Leucine-rich repeat protein kinase family protein	PF00069,PF00560	PTHR24420,PTHR24420:SF541	KOG1187			GO:0004672,GO:0005524,GO:0006468,GO:0005515	AT2G26730.1
Gorai.001G070300	1	70	4	46	97	1	ubiquitin-conjugating enzyme 5	PF00179	PTHR24067,PTHR24067:SF19	KOG0416			GO:0016881	AT1G63800.1
Gorai.001G070400	3	2	5	15	15	3	DegP protease 9	PF00089	PTHR22939,PTHR22939:SF1	KOG1320			GO:0004252,GO:0006508	AT5G40200.1
Gorai.001G070500	2	3	53	0	1	35	trehalose-phosphatase/synthase 9	PF02358,PF00982	PTHR10788	KOG1050			GO:0003824,GO:0005992	AT1G23870.1
Gorai.001G070600	18	13	1	1	1	10	Rhodanese/Cell cycle control phosphatase superfamily protein	PF00581	PTHR18838	KOG1530				AT1G17850.2
Gorai.001G070700	35	43	48	48	0	0	NAC domain containing protein 57	PF02365					GO:0003677,GO:0006355	AT3G17730.1
Gorai.001G070800	28	none	30	none	105	none	Raffinose synthase family protein	PF05691						AT5G40390.1
Gorai.001G070900	18	18	2	0	33	42								AT1G28150.1
Gorai.001G071000	1	14	3	4	2	128	ADP-glucose pyrophosphorylase family protein	PF00483	PTHR22572	KOG1460			GO:0016779,GO:0009058	AT1G74910.1
Gorai.001G071100	9	0	6	18	27	100								AT1G73350.2
Gorai.001G071200	5	0	56	5	0	0	aldehyde dehydrogenase 10A8	PF00171	PTHR11699,PTHR11699:SF45	KOG2450	1.2.1.8	K00130	GO:0016491,GO:0008152,GO:0055114	AT1G74920.1
Gorai.001G071300	2	2	7	23	64	3	FKBP12 interacting protein 37		PTHR15217	KOG2991				AT3G54170.1
Gorai.001G071400	2	2	5	5	23	3	Glucose-6-phosphate/phosphate translocator-related	PF03151,PF00892	PTHR11132	KOG1441			GO:0016020,GO:0055085	AT5G33320.1
Gorai.001G071500	8	7	46	4	0	87								AT5G50290.1
Gorai.001G071600	2	4	1	16	16	71	Pentatricopeptide repeat (PPR) superfamily protein	PF01535	PTHR24015:SF74,PTHR24015					AT4G17616.1
Gorai.001G071700	2	2	1	7	86	65	embryo defective 2759							AT5G63050.1
Gorai.001G071800	9	1	9	11	21	106	S-adenosyl-L-methionine-dependent methyltransferases superfamily protein	PF03141	PTHR10108,PTHR10108:SF37				GO:0008168,GO:0008152	AT1G26850.1
Gorai.001G072000	20	12	1	4	1	17	NAP1-related protein 2	PF00956	PTHR11875,PTHR11875:SF47	KOG1508			GO:0006334,GO:0005634	AT1G18800.1
Gorai.001G072100	4	3	7	2	22	94	2-oxoglutarate (2OG) and Fe(II)-dependent oxygenase superfamily protein	PF03171	PTHR10209	KOG0143			GO:0016491,GO:0016706,GO:0055114	AT3G19010.1
Gorai.001G072200	5	2	16	1	0	3	TEOSINTE BRANCHED, cycloidea and PCF (TCP) 14	PF03634	PTHR11584:SF275,PTHR11584					AT3G47620.1
Gorai.001G072300	4	4	4	1	8	12	NAD(P)-binding Rossmann-fold superfamily protein	PF00106	PTHR24322:SF98,PTHR24322	KOG1208			GO:0016491,GO:0008152,GO:0003824,GO:0050662,GO:0044237	AT5G50130.1
Gorai.001G072400	56	41	18	5	20	3	IQ-domain 30	PF00612	PTHR13140,PTHR13140:SF187				GO:0005515	AT1G18840.1
Gorai.001G072500	12	12	4	19	8	8	FKBP-like peptidyl-prolyl cis-trans isomerase family protein	PF00639	PTHR10657	KOG3258	5.2.1.8	K09579	GO:0016853	AT1G26550.1
Gorai.001G072600	2	2	5	5	3	4	fucosyltransferase 1	PF03254			2.4.1.-	K13681	GO:0008107,GO:0042546,GO:0016020	AT2G03220.1
Gorai.001G072700	13	11	4	1	10	1	D-ribulose-5-phosphate-3-epimerase	PF00834	PTHR11749	KOG3111	5.1.3.1	K01783	GO:0004750,GO:0005975	AT5G61410.1
Gorai.001G072800	4	15	9	9	13	15	KH domain-containing protein / zinc finger (CCCH type) family protein	PF00013,PF00642	PTHR10288,PTHR10288:SF5				GO:0003723,GO:0003676,GO:0008270	AT5G06770.1
Gorai.001G072900	12	1	3	19	80	2	Protein of unknown function (DUF962)	PF06127		KOG3292				AT1G18720.1
Gorai.001G073000	11	1	4	18	7	66
Gorai.001G073200	2	4	5	2	3	13	C2 calcium/lipid-binding plant phosphoribosyltransferase family protein	PF00168,PF08372	PTHR10024:SF97,PTHR10024				GO:0005515	AT1G74720.1
Gorai.001G073300	6	6	25	25	99	99	DEA(D/H)-box RNA helicase family protein		PTHR24031,PTHR24031:SF125					AT1G31970.1
Gorai.001G073400	20	20	3	3	0	0	Protein kinase superfamily protein		PTHR24420,PTHR24420:SF416					AT2G30740.1
Gorai.001G073500	1	1	4	3	8	2	SPFH/Band 7/PHB domain-containing membrane-associated protein family	PF01145	PTHR10264,PTHR10264:SF25	KOG2620			GO:0016020	AT5G62740.1
Gorai.001G073600	4	4	3	6	2	2	homeobox 1	PF02183,PF00046	PTHR24326,PTHR24326:SF218	KOG0843			GO:0003700,GO:0043565,GO:0006355,GO:0003677,GO:0005634	AT3G01470.1
Gorai.001G073700	43	10	45	1	1	57
Gorai.001G073800	13	9	1	25	43	0	Integral membrane HPP family protein	PF04982						AT5G62720.1
Gorai.001G073900	1	4	6	9	5	13	NAD(P)-binding Rossmann-fold superfamily protein	PF00106	PTHR24322	KOG0725			GO:0016491,GO:0008152,GO:0003854,GO:0016616,GO:0006694,GO:0055114,GO:0003824,GO:0050662,GO:0044237	AT2G47140.1
Gorai.001G074000	3	3	5	5	4	22	Leucine-rich repeat protein kinase family protein	PF00069,PF00560,PF08263	PTHR24420,PTHR24420:SF873	KOG1187			GO:0004672,GO:0005524,GO:0006468,GO:0005515	AT5G62710.1
Gorai.001G074100	1	14	29	0	0	123	proline-rich family protein	PF09429	PTHR13361,PTHR13361:SF1	KOG4672			GO:0006396	AT5G62640.1
Gorai.001G074200	7	18	3	6	73	0	AGAMOUS-like 65	PF00319	PTHR11945,PTHR11945:SF60	KOG0014			GO:0003677,GO:0046983,GO:0043565,GO:0006355,GO:0005634,GO:0003700	AT1G18750.1
Gorai.001G074300	4	1	5	10	46	24	light-harvesting chlorophyll-protein complex I subunit A4	PF00504	PTHR21649			K08910	GO:0016020,GO:0009765	AT3G47470.1
Gorai.001G074400	2	2	21	5	32	3	Biotin/lipoate A/B protein ligase family	PF03099	PTHR12561				GO:0003824,GO:0006464	AT3G29010.1
Gorai.001G074500	16	1	4	4	17	2								AT3G47510.1
Gorai.001G074600	5	2	5	2	3	3	malate dehydrogenase	PF00056,PF02866	PTHR11540:SF1,PTHR11540	KOG1494	1.1.1.37	K00026	GO:0016491,GO:0055114,GO:0003854,GO:0016616,GO:0006694,GO:0030060,GO:0006108	AT3G47520.1
Gorai.001G074700	0	23	1	23	6	36	RNA-binding (RRM/RBD/RNP motifs) family protein with retrovirus zinc finger-like domain	PF00098,PF00076	PTHR24012:SF188,PTHR24012	KOG4207			GO:0003676,GO:0008270	AT3G26420.1
Gorai.001G074800	62	0	32	34	0	0
Gorai.001G074900	28	47	34	36	105	0	BR enhanced expression 3	PF00010	PTHR12565,PTHR12565:SF7				GO:0030528,GO:0006355	AT1G73830.1
Gorai.001G075000	21	none	32	none	83	none	myb domain protein 62	PF00249	PTHR10641	KOG0048			GO:0003677	AT1G68320.1
Gorai.001G075100	5	5	2	8	1	53	Ribosomal protein S7e family protein	PF01251	PTHR11278	KOG3320			GO:0003735,GO:0006412,GO:0005622,GO:0005840	AT1G48830.1
Gorai.001G075200	3	15	20	53	4	38	ATP binding microtubule motor family protein	PF00225,PF11995	PTHR24115:SF323,PTHR24115	KOG0242			GO:0003777,GO:0005524,GO:0007018	AT1G18370.1
Gorai.001G075300	13	2	1	2	81	1	cytochrome P450, family 77, subfamily A, polypeptide 5 pseudogene	PF01188,PF02746	PTHR13794,PTHR13794:SF13				GO:0008152,GO:0003824	AT3G18270.1
Gorai.001G075400	15	8	9	4	117	12	Reticulon family protein	PF02453	PTHR10994:SF27,PTHR10994	KOG1792			GO:0005783	AT3G18260.1
Gorai.001G075600	2	2	1	1	1	1	Adenine nucleotide alpha hydrolases-like superfamily protein	PF00582					GO:0006950	AT5G17390.1
Gorai.001G075700	none	6	none	25	none	99	BCL-2-associated athanogene 5	PF00612,PF02179					GO:0005515,GO:0051087,GO:0006915	AT1G12060.1
Gorai.001G075800	1	52	19	2	2	15	AGAMOUS-like 8	PF01486,PF00319	PTHR11945:SF19,PTHR11945	KOG0014			GO:0003677,GO:0046983,GO:0003700,GO:0006355,GO:0005634,GO:0043565	AT5G60910.1
Gorai.001G075900	8	8	2	1	15	4	transporter associated with antigen processing protein 2	PF00664,PF00005	PTHR24221:SF123,PTHR24221	KOG0058			GO:0005524,GO:0016887,GO:0042626,GO:0006810,GO:0055085,GO:0016021	AT5G39040.1
Gorai.001G076000	2	10	0	55	73	40	Transducin/WD40 repeat-like superfamily protein	PF00400	PTHR22840:SF3,PTHR22840	KOG0640		K14406	GO:0005515	AT5G60940.1
Gorai.001G076100	10	8	1	20	1	4
Gorai.001G076300	1	1	3	4	2	6	reversibly glycosylated polypeptide 3	PF03214			2.4.1.-,5.4.99.-	K13379	GO:0008466,GO:0016758,GO:0007047,GO:0030244,GO:0005618,GO:0030054	AT3G08900.1
Gorai.001G076400	1	1	4	4	8	8	SPIRAL1-like1							AT1G26355.1
Gorai.001G076500	2	50	7	5	3	23	Haloacid dehalogenase-like hydrolase (HAD) superfamily protein	PF03031					GO:0005515	AT4G26190.1
Gorai.001G076600	2	2	1	1	1	1								AT1G74160.1
Gorai.001G076700	37	22	28	8	0	149	TEOSINTE BRANCHED 1, cycloidea and PCF transcription factor 5	PF03634						AT5G60970.1
Gorai.001G076800	4	0	10	2	4	6	Protein of unknown function (DUF1118)	PF06549						AT5G08050.1
Gorai.001G076900	5	5	2	2	1	1	PLC-like phosphodiesterases superfamily protein	PF03009	PTHR23344	KOG2258	3.1.4.46	K01126	GO:0008889,GO:0006071	AT1G74210.1
Gorai.001G077000	5	5	2	17	7	1	glycine-rich RNA-binding protein 3	PF00076	PTHR24012				GO:0003676	AT5G61030.1
Gorai.001G077100	1	23	2	18	24	0	Presenilin-2	PF01080	PTHR10202	KOG2736	3.4.23.-	K04505	GO:0004190,GO:0016021	AT2G29900.1
Gorai.001G077200	3	1	8	3	60	9								AT5G61040.1
Gorai.001G077300	5	5	7	1	3	42	3-phosphoserine phosphatase	PF00702	PTHR10000	KOG1615	3.1.3.3	K01079	GO:0003824,GO:0008152	AT1G18640.2
Gorai.001G077400	5	5	35	5	131	56	gamma subunit of Mt ATP synthase	PF00231	PTHR11693:SF4,PTHR11693	KOG1531	3.6.3.14	K02136	GO:0046933,GO:0046961,GO:0015986,GO:0045261	AT2G33040.1
Gorai.001G077500	1	1	2	8	24	66	Protein of unknown function, transmembrane-40	PF10160	PTHR15876,PTHR15876:SF9	KOG4536				AT3G05010.1
Gorai.001G077600	31	31	4	4	96	96	heat shock protein 101	PF02861,PF00004,PF07724,PF10431	PTHR11638,PTHR11638:SF50	KOG1051			GO:0005524,GO:0008134,GO:0006355,GO:0019538,GO:0016887	AT1G74310.1
Gorai.001G077700	31	73	26	52	130	3	HSP20-like chaperones superfamily protein	PF00011	PTHR11527,PTHR11527:SF14	KOG0710		K13993		AT1G53540.1
Gorai.001G077800	1	1	3	4	2	46	diacylglycerol kinase1	PF00609,PF00781,PF00130	PTHR11255:SF33,PTHR11255	KOG1169	2.7.1.107	K00901	GO:0035556,GO:0004143,GO:0007205	AT5G07920.1
Gorai.001G077900	1	1	6	3	5	27	UDP-glucose 6-dehydrogenase family protein	PF00984,PF03720,PF03721	PTHR11374	KOG2666	1.1.1.22	K00012	GO:0016616,GO:0051287,GO:0055114	AT5G15490.1
Gorai.001G078000	1	5	1	29	70	54	Leucine-rich repeat (LRR) family protein	PF00560	PTHR24420,PTHR24420:SF518				GO:0005515	AT5G61240.1
Gorai.001G078100	39	1	1	11	4	27	soluble N-ethylmaleimide-sensitive factor adaptor protein 33	PF05739	PTHR19305	KOG3065		K08509	GO:0005515	AT5G61210.1
Gorai.001G078200	3	3	8	7	37	6	putative endonuclease or glycosyl hydrolase with C2H2-type zinc finger domain	PF12171	PTHR23067:SF18,PTHR23067					AT5G61190.1
Gorai.001G078300	28	8	34	0	105	1	Remorin family protein	PF03763						AT5G61280.1
Gorai.001G078400	0	13	7	7	21	1	alpha-N-acetylglucosaminidase family / NAGLU family	PF05089	PTHR12872	KOG2233				AT5G13690.1
Gorai.001G078600	13	5	6	5	54	33	Ribosomal protein S5 family protein	PF03719,PF00333	PTHR13718,PTHR13718:SF4	KOG0877		K02981	GO:0003723,GO:0003735,GO:0006412,GO:0005622,GO:0005840	AT1G58983.1
Gorai.001G078700	19	19	22	22	6	3		PF03819	PTHR14552:SF2,PTHR14552					AT3G25400.1
Gorai.001G078800	11	1	2	0	7	0	eukaryotic elongation factor 5A-1	PF00467,PF01287	PTHR11673	KOG3271		K03263	GO:0003723,GO:0003746,GO:0043022,GO:0006452,GO:0045901,GO:0045905,GO:0008612	AT1G13950.1
Gorai.001G078900	2	2	1	1	1	1	actin binding	PF10409,PF02181	PTHR23213,PTHR23213:SF18	KOG1922			GO:0005515	AT5G07740.1
Gorai.001G079000	1	1	3	3	2	2								AT5G61340.1
Gorai.001G079100	2	2	1	1	3	1	zinc finger (C3HC4-type RING finger) family protein	PF00097,PF02190	PTHR23327	KOG4159			GO:0004176,GO:0006508	AT1G18660.1
Gorai.001G079200	7	none	11	none	0	none	Protein kinase superfamily protein	PF11721,PF07714	PTHR24420:SF550,PTHR24420	KOG1187			GO:0004672,GO:0005524,GO:0006468	AT5G61350.1
Gorai.001G079300	13	14	2	3	50	93	Galactosyltransferase family protein	PF01762,PF00337	PTHR11214,PTHR11214:SF11	KOG2287			GO:0005529,GO:0008378,GO:0006486,GO:0016020	AT5G62620.1
Gorai.001G079500	6	6	4	4	10	10	diacylglycerol acyltransferase family	PF03982	PTHR12317				GO:0016747	AT3G51520.1
Gorai.001G079600	6	6	22	22	129	129								AT5G46560.1
Gorai.001G079700	1	9	43	23	5	1	protein phosphatase 5.2	PF08321,PF00515,PF00149	PTHR11668,PTHR11668:SF12	KOG0376	3.1.3.16	K04460	GO:0016787,GO:0005515,GO:0046872,GO:0004722	AT2G42810.2
Gorai.001G079800	5	5	5	2	23	1	ARM repeat superfamily protein	PF08389,PF03810	PTHR12363,PTHR12363:SF19	KOG2081			GO:0008565,GO:0006886	AT5G62600.1
Gorai.001G079900	20	12	1	4	7	10	general regulatory factor 7	PF00244	PTHR18860	KOG0841		K06630	GO:0019904	AT3G02520.1
Gorai.001G080000	7	3	34	5	12	15	Zinc-finger domain of monoamine-oxidase A repressor R1 protein	PF10497,PF02791						AT5G38690.1
Gorai.001G080100	36	4	19	3	12	2			PTHR24619:SF141,PTHR24619					AT5G16030.1
Gorai.001G080200	12	18	2	10	7	42	Cytochrome c oxidase biogenesis protein Cmc1-like	PF08583		KOG4624				AT5G16060.1
Gorai.001G080300	10	24	21	21	11	11	HEAT repeat-containing protein		PTHR21663	KOG1822				AT1G67140.3
Gorai.001G080400	28	3	11	11	105	19
Gorai.001G080500	3	3	30	11	0	19
Gorai.001G080600	none	6	none	33	none	0	HEAT repeat-containing protein							AT1G67140.3
Gorai.001G080700	0	2	27	12	0	3	Pyridoxal phosphate (PLP)-dependent transferases superfamily protein	PF00282	PTHR11999,PTHR11999:SF11	KOG0628			GO:0016831,GO:0030170,GO:0019752	AT2G20340.1
Gorai.001G080800	3	17	27	15	3	0		PF10536
Gorai.001G080900	1	2	30	4	6	14
Gorai.001G081000	9	45	8	8	47	65								AT1G67050.1
Gorai.001G081100	1	11	3	19	2	10	plastidic GLC translocator	PF00083	PTHR24063,PTHR24063:SF84	KOG0254			GO:0022857,GO:0055085,GO:0016021	AT5G16150.1
Gorai.001G081200	1	5	4	1	17	1	sterol 1	PF04116	PTHR11863,PTHR11863:SF2	KOG0872	1.14.21.6	K00227	GO:0005506,GO:0016491,GO:0006633,GO:0055114	AT3G02580.1
Gorai.001G081400	0	0	14	14	0	0	RNA-dependent RNA polymerase 1	PF05183	PTHR23079				GO:0003968	AT1G14790.1
Gorai.001G081600	2	8	10	10	3	4	ammonium transporter 1;2	PF00909	PTHR11730:SF8,PTHR11730	KOG0682			GO:0072488,GO:0016020,GO:0008519	AT1G64780.1
Gorai.001G081700	8	1	2	4	81	12	Protein kinase superfamily protein	PF07714	PTHR24420,PTHR24420:SF441	KOG1187			GO:0004672,GO:0005524,GO:0006468	AT1G67000.1
Gorai.001G081800	12	14	4	1	7	59	cytochrome B561-1	PF03188	PTHR10106,PTHR10106:SF0	KOG1619		K08360	GO:0016021	AT5G38630.1
Gorai.001G081900	5	1	25	4	104	8	receptor-like kinase 1	PF00069,PF00560,PF08263	PTHR24420,PTHR24420:SF537	KOG1187			GO:0004672,GO:0005524,GO:0006468,GO:0005515	AT1G48480.1
Gorai.001G082000	1	1	9	2	2	36								AT1G67170.1
Gorai.001G082100	3	0	10	51	4	95								AT3G19660.1
Gorai.001G082200	2	2	1	34	1	0	glycosyl hydrolase family 81 protein	PF03639		KOG2254			GO:0033903,GO:0016998	AT5G15870.1
Gorai.001G082300	2	2	1	10	1	1	NAD(P)-binding Rossmann-fold superfamily protein	PF01073	PTHR10366,PTHR10366:SF9	KOG1502			GO:0003854,GO:0016616,GO:0006694,GO:0055114,GO:0003824,GO:0050662,GO:0044237	AT5G14700.1
Gorai.001G082400	12	1	1	3	10	2		PF03661					GO:0016021	AT3G02420.1
Gorai.001G082500	5	20	5	1	1	67	prenylcysteine methylesterase	PF07859	PTHR11559,PTHR11559:SF87	KOG1515			GO:0016787,GO:0008152	AT5G15860.1
Gorai.001G082600	1	14	6	5	123	5								AT5G37550.1
Gorai.001G082700	2	2	7	2	3	26	Nucleic acid-binding, OB-fold-like protein	PF02765		KOG4757			GO:0003677,GO:0000723,GO:0000784	AT5G06310.1
Gorai.001G082800	2	2	56	2	1	1	Tetratricopeptide repeat (TPR)-like superfamily protein	PF00515	PTHR24559:SF32,PTHR24559				GO:0005515	AT5G37590.1
Gorai.001G082900	12	13	2	1	7	10								AT5G16550.1
Gorai.001G083000	10	11	5	52	3	1
Gorai.001G083100	1	1	3	4	2	8	Endomembrane protein 70 protein family	PF02990	PTHR10766,PTHR10766:SF14	KOG1277			GO:0016021	AT5G37310.1
Gorai.001G083200	1	1	9	3	5	2								AT3G03210.1
Gorai.001G083300	2	2	1	1	1	1	expansin A13	PF01357,PF03330						AT3G03220.1
Gorai.001G083400	4	7	9	19	2	0	sucrose synthase 5	PF00534,PF00862	PTHR12526,PTHR12526:SF27	KOG0853	2.4.1.13	K00695	GO:0009058,GO:0005985	AT5G37180.1
Gorai.001G083500	none	19	none	31	none	0
Gorai.001G083600	15	15	5	5	90	62	glutathione S-transferase phi 12	PF02798,PF00043	PTHR11260,PTHR11260:SF55	KOG0867	2.5.1.18	K00799	GO:0005515	AT5G17220.1
Gorai.001G083700	48	0	15	5	90	3	PHYTOENE SYNTHASE	PF00494		KOG1459	2.5.1.32	K02291	GO:0016740,GO:0009058	AT5G17230.1
Gorai.001G083800	11	1	2	19	1	8	Class I glutamine amidotransferase-like superfamily protein	PF01965	PTHR11019:SF28,PTHR11019	KOG2764				AT3G02720.1
Gorai.001G083900	4	4	8	5	11	23	Methyltransferase MT-A70 family protein	PF05063	PTHR13107	KOG2097			GO:0008168,GO:0006139	AT4G09980.1
Gorai.001G084000	7	7	1	11	28	82	lipid phosphate phosphatase 3	PF01569	PTHR10165,PTHR10165:SF45	KOG3030			GO:0003824,GO:0016020	AT3G02600.1
Gorai.001G084100	1	1	25	25	77	77	Zinc finger C-x8-C-x5-C-x3-H type family protein	PF00642	PTHR12547:SF17,PTHR12547				GO:0003676,GO:0008270	AT1G66810.1
Gorai.001G084200	0	5	0	8	27	3	MATE efflux family protein	PF01554	PTHR11206:SF11,PTHR11206	KOG1347			GO:0015238,GO:0015297,GO:0006855,GO:0055085,GO:0016020	AT1G66780.1
Gorai.001G084300	35	2	12	1	101	1	MATE efflux family protein	PF01554	PTHR11206:SF11,PTHR11206				GO:0015238,GO:0015297,GO:0006855,GO:0055085,GO:0016020	AT2G04050.1
Gorai.001G084400	35	3	27	30	133	134								AT3G03280.1
Gorai.001G084600	1	1	2	2	6	6	S-adenosyl-L-methionine-dependent methyltransferases superfamily protein	PF08242	PTHR12843	KOG1271			GO:0008168,GO:0008276,GO:0006479,GO:0005737,GO:0008152	AT1G66680.1
Gorai.001G084700	none	35	none	46	none	0
Gorai.001G084900	none	2	none	5	none	3	RING/FYVE/PHD zinc finger superfamily protein	PF00097,PF12428	PTHR23012					AT2G01275.1
Gorai.001G085000	3	3	1	1	19	19	Bifunctional inhibitor/lipid-transfer protein/seed storage 2S albumin superfamily protein	PF00234						AT4G33355.1
Gorai.001G085100	3	none	12	none	4	none	Bifunctional inhibitor/lipid-transfer protein/seed storage 2S albumin superfamily protein							AT4G33355.1
Gorai.001G085200	2	28	46	39	0	130	Bifunctional inhibitor/lipid-transfer protein/seed storage 2S albumin superfamily protein							AT2G18370.1
Gorai.001G085300	1	1	3	5	2	0	Auxin efflux carrier family protein	PF03547		KOG2722			GO:0055085,GO:0016021	AT1G71090.1
Gorai.001G085400	15	65	51	14	20	108								AT2G01300.1
Gorai.001G085500	18	1	22	7	37	52								AT5G38060.1
Gorai.001G085600	20	11	4	2	121	1	P-loop containing nucleoside triphosphate hydrolases superfamily protein	PF02223	PTHR10344	KOG3327			GO:0004798,GO:0005524,GO:0006233	AT5G59440.3
Gorai.001G085700	3	3	18	16	37	71	RNA polymerase II transcription elongation factor	PF09816	PTHR15970,PTHR15970:SF2	KOG4795				AT1G71080.1
Gorai.001G085800	18	18	18	22	3	3	CLP protease proteolytic subunit 3	PF00574	PTHR10381,PTHR10381:SF3	KOG0840	3.4.21.92	K01358	GO:0004252,GO:0006508	AT1G66670.1
Gorai.001G085900	3	2	5	2	15	3	formyltransferase, putative	PF00551,PF02911	PTHR11138	KOG3082	2.1.2.9	K00604	GO:0016742,GO:0009058	AT1G66520.1
Gorai.001G086000	4	3	13	22	76	0	Heavy metal transport/detoxification superfamily protein	PF00403	PTHR22814,PTHR22814:SF14	KOG1603			GO:0046872,GO:0030001	AT5G17450.1
Gorai.001G086100	2	30	5	46	3	0	Heavy metal transport/detoxification superfamily protein	PF00403	PTHR22814,PTHR22814:SF14	KOG1603			GO:0046872,GO:0030001	AT5G17450.1
Gorai.001G086200	7	42	1	11	28	20	B-S glucosidase 44	PF00232	PTHR10353	KOG0626			GO:0004553,GO:0005975	AT3G18080.1
Gorai.001G086300	8	7	7	11	22	12	B-S glucosidase 44	PF00232	PTHR10353	KOG0626	3.2.1.21	K05350	GO:0004553,GO:0005975	AT3G18080.1
Gorai.001G086400	16	12	1	3	17	80								AT3G51500.1
Gorai.001G086500	0	2	18	1	44	1	Concanavalin A-like lectin protein kinase family protein	PF00069,PF00139	PTHR24420:SF662,PTHR24420	KOG1187			GO:0004672,GO:0005524,GO:0006468,GO:0005488	AT5G06740.1
Gorai.001G086600	2	2	4	1	1	1	plastid movement impaired 2							AT1G66480.1
Gorai.001G086700	4	0	9	6	2	54	ARM repeat superfamily protein	PF00514	PTHR23315:SF39,PTHR23315				GO:0005515	AT3G03440.1
Gorai.001G087000	18	2	6	23	82	3	pfkB-like carbohydrate kinase family protein	PF00294	PTHR10584,PTHR10584:SF34	KOG2855	2.7.1.4	K00847		AT1G66430.1
Gorai.001G087100	18	2	23	51	1	1	calmodulin like 23	PF00036	PTHR10891:SF39,PTHR10891	KOG0027		K13448		AT1G66400.1
Gorai.001G087400	70	22	32	22	0	4	myb domain protein 113	PF00249	PTHR10641			K09422	GO:0003677	AT1G66370.1
Gorai.001G087600	5	10	1	27	1	0
Gorai.001G087900	none	1	none	8	none	30	glutamine dumper 1							AT4G31730.1
Gorai.001G088000	1	none	38	none	141	none	glutamine dumper 1							AT4G31730.1
Gorai.001G088100	1	1	6	0	5	84	mannosyltransferase family protein	PF05007	PTHR12886	KOG3893	2.4.1.-	K05284	GO:0016758,GO:0006506,GO:0005789,GO:0016021	AT5G22130.1
Gorai.001G088200	3	0	1	13	3	21	Nucleic acid-binding, OB-fold-like protein	PF01336	PTHR13989,PTHR13989:SF6				GO:0003676	AT1G07130.1
Gorai.001G088300	3	3	5	18	3	67	hydroxyproline-rich glycoprotein family protein	PF04683	PTHR22904,PTHR22904:SF167	KOG1308			GO:0005634,GO:0005737	AT5G16620.1
Gorai.001G088400	10	none	12	none	4	none	PsbQ-like 3	PF05757					GO:0005509,GO:0015979,GO:0009523,GO:0009654,GO:0019898	AT2G01918.1
Gorai.001G088500	7	10	1	7	4	22	DNA repair protein Rad4 family	PF03835,PF10404,PF10403,PF10405,PF01841	PTHR12135	KOG2179		K10838	GO:0003684,GO:0006289,GO:0005634,GO:0003677	AT5G16630.1
Gorai.001G088600	7	4	9	6	15	2	high mobility group A	PF00538	PTHR11467				GO:0003677,GO:0006334,GO:0000786,GO:0005634	AT1G14900.1
Gorai.001G088700	11	1	6	3	54	80	senescence-associated family protein							AT1G66330.1
Gorai.001G088800	3	1	24	24	0	109	Gibberellin-regulated family protein	PF02704						AT1G74670.1
Gorai.001G088900	4	4	6	22	2	6	cytochrome P450, family 81, subfamily D, polypeptide 8	PF00067	PTHR24298:SF44,PTHR24298	KOG0156			GO:0005506,GO:0009055,GO:0016705,GO:0020037,GO:0055114	AT4G37370.1
Gorai.001G089100	6	3	8	22	74	4	cytochrome P450, family 81, subfamily D, polypeptide 8	PF00067	PTHR24298:SF44,PTHR24298				GO:0005506,GO:0009055,GO:0016705,GO:0020037,GO:0055114	AT4G37370.1
Gorai.001G089200	10	2	21	1	40	1	Protein of unknown function DUF2359, transmembrane	PF10151	PTHR13448	KOG4467				AT1G23170.2
Gorai.001G089300	3	3	1	1	4	16	dehydroascorbate reductase 1	PF02798	PTHR11260,PTHR11260:SF15	KOG1422			GO:0005515	AT5G16710.1
Gorai.001G089400	4	4	3	6	2	9	GRAS family transcription factor family protein	PF03514,PF12041				K14494		AT2G01570.1
Gorai.001G089500	11	18	6	15	54	0	5\'-AMP-activated protein kinase-related		PTHR10343					AT5G39790.1
Gorai.001G089700	62	16	30	24	0	1	Homeodomain-like superfamily protein	PF00249					GO:0003677	AT4G37180.1
Gorai.001G089800	none	69	none	24	none	109	Homeodomain-like superfamily protein	PF00249					GO:0003677	AT4G37180.2
Gorai.001G089900	0	6	12	10	45	1	RING/U-box superfamily protein	PF00097	PTHR22766,PTHR22766:SF20					AT5G38895.3
Gorai.001G090000	6	1	10	6	4	30	AGAMOUS-like 8	PF01486,PF00319	PTHR11945:SF19,PTHR11945	KOG0014			GO:0003677,GO:0046983,GO:0003700,GO:0006355,GO:0005634,GO:0043565	AT5G60910.1
Gorai.001G090100	none	35	none	14	none	0	myb domain protein 121	PF00249	PTHR10641				GO:0003677	AT3G30210.1
Gorai.001G090200	3	2	35	6	94	0	reversibly glycosylated polypeptide 1	PF03214			2.4.1.-,5.4.99.-	K13379	GO:0008466,GO:0016758,GO:0007047,GO:0030244,GO:0005618,GO:0030054	AT3G02230.1
Gorai.001G090300	8	12	27	13	0	4	brassinosteroid-6-oxidase 2	PF00067	PTHR24286,PTHR24286:SF21	KOG0157			GO:0005506,GO:0009055,GO:0016705,GO:0020037,GO:0055114	AT3G30180.1
Gorai.001G090400	68	1	25	0	18	0	Malectin/receptor-like protein kinase family protein	PF07714	PTHR24420:SF418,PTHR24420	KOG1187			GO:0004672,GO:0005524,GO:0006468	AT3G51550.1
Gorai.001G090600	1	1	32	6	6	5	ralf-like 27							AT3G29780.1
Gorai.001G090700	7	4	2	20	15	46	ralf-like 27	PF07803						AT3G29780.1
Gorai.001G090900	4	none	20	none	4	none	ralf-like 27							AT3G29780.1
Gorai.001G091200	none	38	none	28	none	0
Gorai.001G091300	30	8	10	10	0	3
Gorai.001G091500	35	none	14	none	0	none
Gorai.001G091600	8	8	1	12	17	85
Gorai.001G091700	9	1	12	12	45	19
Gorai.001G091900	22	22	24	2	133	3	NAC domain containing protein 42	PF02365					GO:0003677,GO:0006355	AT2G43000.1
Gorai.001G092000	1	4	3	1	2	21	phytoene desaturation 1	PF00903	PTHR11959	KOG0638	1.13.11.27	K00457	GO:0009072,GO:0003868	AT1G06570.1
Gorai.001G092100	2	2	1	1	1	1	Eukaryotic aspartyl protease family protein	PF00026	PTHR13683,PTHR13683:SF98	KOG1339			GO:0004190,GO:0006508	AT3G59080.1
Gorai.001G092200	74	8	26	32	1	1	Cytochrome b561/ferric reductase transmembrane protein family	PF03188	PTHR23130,PTHR23130:SF18				GO:0016021	AT4G18260.1
Gorai.001G092300	74	3	5	14	0	12								AT2G42975.1
Gorai.001G092400	9	13	8	1	71	43	alpha/beta-Hydrolases superfamily protein							AT5G50890.1
Gorai.001G092500	1	0	8	7	5	29		PF06454						AT3G59090.1
Gorai.001G092600	2	11	11	23	1	98	S-adenosyl-L-methionine-dependent methyltransferases superfamily protein	PF07942	PTHR12303	KOG2798				AT2G32170.1
Gorai.001G092700	14	14	3	3	2	2	Topoisomerase II-associated protein PAT1		PTHR21551			K12617		AT3G22270.1
Gorai.001G092800	1	1	3	3	2	2								AT2G32190.1
Gorai.001G092900	5	5	2	10	33	3	Ribosomal L27e protein family	PF01777,PF00467	PTHR10497	KOG3418		K02901	GO:0003735,GO:0006412,GO:0005622,GO:0005840	AT4G15000.1
Gorai.001G093000	4	1	20	8	62	5	hAT transposon superfamily	PF04937,PF02892,PF05699	PTHR10775:SF75,PTHR10775				GO:0003677,GO:0046983	AT4G15020.1
Gorai.001G093100	24	14	3	6	5	5				KOG0978				AT2G32240.1
Gorai.001G093200	5	5	23	23	39	1	Core-2/I-branching beta-1,6-N-acetylglucosaminyltransferase family protein	PF02485					GO:0008375,GO:0016020	AT1G10280.1
Gorai.001G093300	2	17	5	1	3	62	DHHC-type zinc finger family protein	PF01529	PTHR22883	KOG1311			GO:0008270	AT4G15080.1
Gorai.001G093400	4	4	33	8	130	5	VQ motif-containing protein	PF05678						AT3G22160.1
Gorai.001G093500	4	68	47	39	138	0	zinc transporter 5 precursor	PF02535	PTHR11040,PTHR11040:SF1	KOG1558			GO:0046873,GO:0030001,GO:0055085,GO:0016020	AT1G05300.1
Gorai.001G093600	13	16	0	38	0	69	Pectin lyase-like superfamily protein	PF01095					GO:0030599,GO:0042545,GO:0005618	AT1G05310.1
Gorai.001G093700	13	5	40	1	163	1	Transcription factor TFIIE, alpha subunit	PF02002	PTHR13097	KOG2593		K03136		AT1G03280.1
Gorai.001G093800	5	5	17	2	1	1	breast basic conserved 1	PF01294	PTHR11722	KOG3295			GO:0003735,GO:0006412,GO:0005622,GO:0005840	AT3G49010.1
Gorai.001G093900	8	8	15	24	1	1	Carbohydrate-binding X8 domain superfamily protein	PF07983	PTHR16631					AT1G79480.1
Gorai.001G094000	7	7	35	8	4	37	Bifunctional inhibitor/lipid-transfer protein/seed storage 2S albumin superfamily protein	PF00234						AT3G22142.1
Gorai.001G094100	6	6	10	10	41	1
Gorai.001G094200	6	6	12	12	41	41
Gorai.001G094300	16	9	11	0	19	45	WRKY family transcription factor	PF03106					GO:0003700,GO:0043565,GO:0006355	AT1G62300.1
Gorai.001G094400	0	0	1	1	1	0	dentin sialophosphoprotein-related							AT1G05090.1
Gorai.001G094500	12	5	10	10	0	3	Protein of unknown function (DUF1068)	PF06364	PTHR17695					AT1G05070.1
Gorai.001G094600	3	3	7	20	22	4		PF05786	PTHR13108	KOG2328		K06676		AT2G32590.1
Gorai.001G094700	35	0	12	0	4	28	Cysteine/Histidine-rich C1 domain family protein	PF07649,PF03107	PTHR13871:SF2,PTHR13871				GO:0047134,GO:0055114	AT5G40320.1
Gorai.001G095000	2	2	1	1	1	26	embryo defective 1381							AT2G31340.1
Gorai.001G095100	9	46	11	11	0	19	ENTH/ANTH/VHS superfamily protein	PF07651	PTHR22951,PTHR22951:SF1				GO:0005543	AT1G05020.1
Gorai.001G095200	12	12	17	4	10	10	small ubiquitin-like modifier 2	PF11976	PTHR10562	KOG1769		K12160	GO:0005515	AT5G55160.1
Gorai.001G095300	8	20	10	1	1	86	GRF zinc finger / Zinc knuckle protein	PF00098				K10569	GO:0003676,GO:0008270	AT5G13920.1
Gorai.001G095400	4	4	8	3	5	2								AT2G32970.2
Gorai.001G095500	3	3	13	45	76	4	Xanthine/uracil permease family protein	PF00860	PTHR11119,PTHR11119:SF8	KOG1292			GO:0005215,GO:0006810,GO:0055085,GO:0016020	AT2G05760.1
Gorai.001G095600	11	3	15	25	1	0	Nodulin MtN21 /EamA-like transporter family protein	PF00892	PTHR22911:SF6,PTHR22911				GO:0016020	AT2G05755.1
Gorai.001G095700	9	9	8	12	47	19	glycosyl hydrolase 9B8	PF00759	PTHR22298				GO:0004553,GO:0005975	AT2G32990.1
Gorai.001G095800	4	14	5	5	24	56	serine/threonine protein phosphatase 2A 55 kDa regulatory subunit B prime gamma	PF08059,PF00789	PTHR23333,PTHR23333:SF6	KOG2086			GO:0005515	AT4G15410.1
Gorai.001G095900	8	8	10	10	4	4
Gorai.001G096000	5	2	2	1	1	1	chitin elicitor receptor kinase 1	PF07714	PTHR24420:SF421,PTHR24420	KOG1187			GO:0004672,GO:0005524,GO:0006468	AT3G21630.1
Gorai.001G096100	5	5	17	17	33	1	ribosomal protein S27	PF01667	PTHR11594	KOG1779		K02978	GO:0003735,GO:0006412,GO:0005622,GO:0005840	AT3G61110.1
Gorai.001G096200	36	0	4	4	21	158	ethylene-forming enzyme							AT1G05010.1
Gorai.001G096300	7	3	4	4	12	12	ethylene-forming enzyme	PF03171	PTHR10209,PTHR10209:SF55	KOG0143	1.14.17.4	K05933	GO:0016491,GO:0016706,GO:0055114	AT1G05010.1
Gorai.001G096400	16	8	16	3	47	12	ethylene-forming enzyme	PF03171	PTHR10209,PTHR10209:SF55	KOG0143	1.14.17.4	K05933	GO:0016491,GO:0016706,GO:0055114	AT1G05010.1
Gorai.001G096500	4	1	8	8	5	47	Phosphotyrosine protein phosphatases superfamily protein	PF03162		KOG1572				AT1G05000.1
Gorai.001G096600	9	4	24	24	0	21	Tetratricopeptide repeat (TPR)-like superfamily protein		PTHR10098:SF31,PTHR10098					AT3G14110.3
Gorai.001G096700	62	none	37	none	0	none	response regulator 12	PF00072,PF00249	PTHR26402:SF38,PTHR26402				GO:0000156,GO:0000160,GO:0006355,GO:0003677	AT2G25180.1
Gorai.001G096900	14	14	1	7	1	39	Zinc finger C-x8-C-x5-C-x3-H type family protein	PF00642	PTHR12506,PTHR12506:SF11	KOG1677			GO:0003676,GO:0008270	AT1G04990.1
Gorai.001G097000	4	1	5	7	21	52	indole-3-butyric acid response 5	PF00782	PTHR10159:SF19,PTHR10159	KOG1716			GO:0008138,GO:0006470	AT2G04550.1
Gorai.001G097100	14	14	0	18	107	39	Zinc finger C-x8-C-x5-C-x3-H type family protein	PF00642	PTHR12506,PTHR12506:SF11	KOG1677			GO:0003676,GO:0008270	AT1G04990.1
Gorai.001G097200	5	5	2	2	1	3	Pentatricopeptide repeat (PPR) superfamily protein	PF01535	PTHR24015					AT3G62470.1
Gorai.001G097300	2	2	1	2	4	1	Metallo-hydrolase/oxidoreductase superfamily protein		PTHR12553:SF4,PTHR12553					AT2G04530.1
Gorai.001G097400	33	2	20	10	3	3	TATA BOX ASSOCIATED FACTOR II 59	PF02969,PF07571	PTHR10221	KOG2549		K03131	GO:0006352,GO:0005634,GO:0051090,GO:0016986,GO:0003702	AT1G04950.1
Gorai.001G097500	18	49	17	56	1	56
Gorai.001G097600	1	5	0	2	84	1	Ypt/Rab-GAP domain of gyp1p superfamily protein	PF00566	PTHR22957:SF99,PTHR22957	KOG2058			GO:0005097,GO:0032313,GO:0005622	AT3G07890.1
Gorai.001G097700	2	13	2	2	3	50	ankyrin repeat family protein	PF00651	PTHR24413,PTHR24413:SF178	KOG0511			GO:0005515	AT2G04740.1
Gorai.001G097800	4	4	4	3	13	2	fimbrin-like protein 2	PF00307	PTHR19961,PTHR19961:SF9	KOG0046			GO:0005515	AT5G35700.1
Gorai.001G097900	14	1	2	2	0	7	FASCICLIN-like arabinoogalactan 7	PF02469	PTHR10900:SF23,PTHR10900					AT2G04780.1
Gorai.001G098200	10	3	1	1	28	4	RNA-binding (RRM/RBD/RNP motifs) family protein		PTHR20957					AT2G27790.1
Gorai.001G098300	0	1	2	0	6	5	RNA-binding (RRM/RBD/RNP motifs) family protein	PF00076	PTHR24012:SF14,PTHR24012	KOG4205		K14411	GO:0003676	AT3G07810.1
Gorai.001G098400	2	14	5	5	3	5	Kinase-related protein of unknown function (DUF1296)	PF06972	PTHR12758,PTHR12758:SF13					AT3G07660.1
Gorai.001G098500	37	43	48	25	0	0
Gorai.001G098600	4	4	43	8	9	2	RNA-binding (RRM/RBD/RNP motifs) family protein	PF00076	PTHR24012:SF14,PTHR24012	KOG4205			GO:0003676	AT3G13224.2
Gorai.001G098700	3	3	19	3	13	0	AMP-dependent synthetase and ligase family protein	PF00501	PTHR24096	KOG1180	6.2.1.3	K01897	GO:0003824,GO:0008152	AT2G04350.1
Gorai.001G098800	none	31	none	7	none	1								AT4G25330.1
Gorai.001G098900	8	1	4	9	0	25	F-box family protein	PF00646	PTHR22844:SF68,PTHR22844				GO:0005515	AT5G48170.1
Gorai.001G099000	4	4	8	8	9	5	DNAJ heat shock N-terminal domain-containing protein	PF00226,PF11926	PTHR25040:SF41,PTHR25040				GO:0031072	AT2G05250.1
Gorai.001G099100	12	12	0	19	86	2	Sterile alpha motif (SAM) domain-containing protein	PF07647					GO:0005515	AT3G07760.1
Gorai.001G099200	9	44	25	27	0	0								AT4G16447.1
Gorai.001G099300	14	1	0	4	0	17	Peptidase M28 family protein	PF04253,PF04389,PF02225	PTHR10404,PTHR10404:SF15	KOG2195			GO:0008233,GO:0006508	AT3G54720.1
Gorai.001G099400	4	41	7	9	5	24	Protein of unknown function (DUF1423)	PF07227	PTHR21736,PTHR21736:SF14					AT5G48160.1
Gorai.001G099500	41	4	23	1	75	16								AT4G12700.1
Gorai.001G099600	12	1	4	3	97	2	RING/U-box superfamily protein	PF00097	PTHR22764,PTHR22764:SF25					AT2G04240.1
Gorai.001G099700	1	1	41	19	5	36	CONSTANS-like 9	PF06203					GO:0005515	AT3G07650.1
Gorai.001G099800	25	22	12	36	135	35	photosystem II reaction center protein B	PF00421					GO:0016168,GO:0009767,GO:0019684,GO:0009521,GO:0016020	ATCG00680.1
Gorai.001G099900	19	none	15	none	102	none	plastid-encoded CLP P	PF00574	PTHR10381				GO:0004252,GO:0006508	ATCG00670.1
Gorai.001G100000	4	4	3	3	2	30	Homeodomain-like protein with RING/FYVE/PHD-type zinc finger domain							AT1G01150.1
Gorai.001G100100	12	12	40	40	110	39	Endomembrane protein 70 protein family	PF02990	PTHR10766,PTHR10766:SF1	KOG1278			GO:0016021	AT4G12650.1
Gorai.001G100200	3	3	1	1	4	1	HhH-GPD base excision DNA repair family protein	PF00633,PF00730	PTHR10359,PTHR10359:SF1	KOG2457	3.2.2.-	K03575	GO:0003677,GO:0006284	AT4G12740.1
Gorai.001G100300	5	11	2	12	7	49	glyoxylate reductase 1	PF03446	PTHR22981,PTHR22981:SF13	KOG0409			GO:0008677,GO:0055114,GO:0004616,GO:0006098,GO:0016491	AT3G25530.1
Gorai.001G100400	1	1	14	15	20	102
Gorai.001G100500	12	12	1	2	10	7								AT3G07568.1
Gorai.001G100600	10	6	1	8	26	67
Gorai.001G100700	1	19	45	10	0	7	disease resistance family protein / LRR family protein	PF00560,PF08263	PTHR24420,PTHR24420:SF478	KOG0472			GO:0005515	AT2G34930.1
Gorai.001G100800	5	5	1	2	1	7	P-loop containing nucleoside triphosphate hydrolases superfamily protein	PF03029	PTHR21231:SF4,PTHR21231	KOG1534		K06883	GO:0000166	AT4G12790.1
Gorai.001G100900	7	17	1	10	4	90	formin homology 1	PF02181	PTHR23213					AT3G25500.1
Gorai.001G101100	4	4	3	6	9	9	FRIGIDA-like protein	PF07899						AT5G48385.1
Gorai.001G101200	19	27	5	15	6	3	photosystem I subunit l	PF02605				K02699	GO:0015979,GO:0009522,GO:0009538	AT4G12800.1
Gorai.001G101300	23	23	16	16	29	29	DNA-directed RNA polymerase family protein		PTHR19376:SF33,PTHR19376					ATCG00170.1
Gorai.001G101600	21	none	30	none	0	none	glutamate receptor 1.4	PF00060,PF00497	PTHR18966,PTHR18966:SF6	KOG1052			GO:0004970,GO:0005234,GO:0016020,GO:0005215,GO:0006810,GO:0030288	AT3G07520.1
Gorai.001G101800	7	29	8	8	60	63
Gorai.001G101900	1	13	27	12	20	50
Gorai.001G102000	1	1	26	11	0	106								AT3G07510.1
Gorai.001G102100	3	3	18	3	37	27	SKU5 similar 3	PF00394,PF07731,PF07732	PTHR11709:SF18,PTHR11709	KOG1263			GO:0016491,GO:0055114,GO:0005507	AT5G48450.1
Gorai.001G102200	3	4	41	3	27	9	Lactoylglutathione lyase / glyoxalase I family protein	PF06983						AT5G48480.1
Gorai.001G102300	0	1	5	23	3	36	YGGT family protein	PF02325					GO:0016020	AT4G27990.1
Gorai.001G102400	19	none	36	none	0	none								AT3G07425.1
Gorai.001G102500	3	26	5	9	0	35		PF03819	PTHR14552:SF2,PTHR14552					AT3G25400.1
Gorai.001G102600	18	25	1	18	3	67	asparaginyl-tRNA synthetase 2	PF00152	PTHR22594,PTHR22594:SF6	KOG0554			GO:0000166,GO:0004812,GO:0005524,GO:0006418,GO:0005737,GO:0006412	AT3G07420.1
Gorai.001G102700	7	7	8	0	60	11	lipase class 3 family protein	PF01764	PTHR21493,PTHR21493:SF24				GO:0004806,GO:0006629	AT3G07400.1
Gorai.001G102800	1	1	13	8	46	5	Auxin-responsive family protein	PF03188,PF04526	PTHR23130,PTHR23130:SF18	KOG4293			GO:0016021	AT3G25290.1
Gorai.001G102900	5	5	10	17	1	1	Ribosomal protein L32e	PF01655	PTHR23413	KOG0878		K02912	GO:0003735,GO:0006412,GO:0005622,GO:0005840	AT4G18100.1
Gorai.001G103000	6	5	10	10	101	1	Ribosomal protein L32e	PF01655	PTHR23413	KOG0878		K02912	GO:0003735,GO:0006412,GO:0005622,GO:0005840	AT4G18100.1
Gorai.001G103100	6	11	17	1	7	42	Ribosomal protein L32e	PF01655	PTHR23413	KOG0878		K02912	GO:0003735,GO:0006412,GO:0005622,GO:0005840	AT4G18100.1
Gorai.001G103200	37	3	12	30	0	150	Protein of unknown function (DUF506)	PF04720						AT3G07350.1
Gorai.001G103300	2	2	7	7	64	0	basic helix-loop-helix (bHLH) DNA-binding superfamily protein	PF00010	PTHR12565,PTHR12565:SF7				GO:0030528,GO:0006355	AT3G07340.1
Gorai.001G103400	0	33	5	5	51	51	rotamase FKBP 1	PF00254,PF00515	PTHR10516:SF66,PTHR10516	KOG0543	5.2.1.8	K01802	GO:0006457,GO:0005515	AT3G25230.1
Gorai.001G103500	1	3	2	1	24	16	Tetratricopeptide repeat (TPR)-like superfamily protein	PF01535	PTHR24015					AT3G25210.1
Gorai.001G103600	1	none	11	none	106	none
Gorai.001G103700	1	5	2	4	7	81	Oxidoreductase, zinc-binding dehydrogenase family protein	PF00107,PF08240	PTHR11695,PTHR11695:SF34	KOG1198			GO:0008270,GO:0016491,GO:0055114	AT4G13010.1
Gorai.001G103800	16	13	4	4	17	10	Oxidoreductase, zinc-binding dehydrogenase family protein	PF00107,PF08240	PTHR11695,PTHR11695:SF34	KOG1198			GO:0008270,GO:0016491,GO:0055114	AT4G13010.1
Gorai.001G103900	1	12	3	1	2	7	Oxidoreductase, zinc-binding dehydrogenase family protein	PF00107,PF08240	PTHR11695,PTHR11695:SF34	KOG1198			GO:0008270,GO:0016491,GO:0055114	AT4G13010.1
Gorai.001G104000	5	13	9	20	48	55	Oxidoreductase, zinc-binding dehydrogenase family protein	PF00107,PF08240	PTHR11695,PTHR11695:SF34	KOG1198			GO:0008270,GO:0016491,GO:0055114	AT4G13010.1
Gorai.001G104100	60	none	14	none	0	none	Oxidoreductase, zinc-binding dehydrogenase family protein	PF00107	PTHR11695,PTHR11695:SF34				GO:0008270,GO:0016491,GO:0055114	AT4G13010.1
Gorai.001G104200	15	17	7	5	23	3
Gorai.001G104300	10	12	16	18	148	100	Cyclin family protein	PF00134	PTHR10026,PTHR10026:SF7	KOG0794			GO:0019901,GO:0006355,GO:0000079	AT5G48630.1
Gorai.001G104400	30	44	27	5	6	15	cytochrome P450, family 82, subfamily G, polypeptide 1	PF00067	PTHR24298:SF44,PTHR24298	KOG0156			GO:0005506,GO:0009055,GO:0016705,GO:0020037,GO:0055114	AT3G25180.1
Gorai.001G104500	8	26	1	13	4	0	cytochrome P450, family 82, subfamily G, polypeptide 1	PF00067	PTHR24298:SF44,PTHR24298	KOG0156			GO:0005506,GO:0009055,GO:0016705,GO:0020037,GO:0055114	AT3G25180.1
Gorai.001G104600	42	none	9	none	25	none	cytochrome P450, family 82, subfamily G, polypeptide 1	PF00067	PTHR24298:SF44,PTHR24298	KOG0156			GO:0005506,GO:0009055,GO:0016705,GO:0020037,GO:0055114	AT3G25180.1
Gorai.001G104700	25	30	16	34	29	79	CemA-like proton extrusion protein-related	PF03040					GO:0016021	ATCG00530.1
Gorai.001G104800	5	14	2	1	1	0	Nucleotide-diphospho-sugar transferases superfamily protein	PF01501	PTHR13778:SF3,PTHR13778		2.4.1.43	K13648	GO:0016757	AT3G25140.1
Gorai.001G104900	3	3	1	1	21	1								AT3G25130.1
Gorai.001G105000	52	47	25	1	165	14	RING/U-box superfamily protein		PTHR11685,PTHR11685:SF66					AT3G14250.1
Gorai.001G105100	4	4	2	1	62	46	Integrase-type DNA-binding superfamily protein	PF00847					GO:0003700,GO:0006355	AT4G13040.1
Gorai.001G105200	18	4	2	3	3	2	Mitochondrial import inner membrane translocase subunit Tim17/Tim22/Tim23 family protein	PF02466					GO:0015031,GO:0008565,GO:0005743	AT3G25120.1
Gorai.001G105300	24	1	3	8	5	30	RNA binding (RRM/RBD/RNP motifs) family protein	PF00076	PTHR12603	KOG2068	6.3.2.19	K10643	GO:0003676	AT3G45630.1
Gorai.001G105400	2	29	1	1	1	0	DNA repair (Rad51) family protein	PF08423	PTHR22942,PTHR22942:SF15	KOG1433		K10869	GO:0003678,GO:0005524,GO:0006260	AT2G28560.2
Gorai.001G105500	2	2	3	3	155	155	transportin 1							AT2G16950.1
Gorai.001G105600	1	1	14	19	20	8
Gorai.001G105700	2	none	15	none	0	none								AT1G07860.1
Gorai.001G105900	4	1	3	1	2	6	BTB/POZ domain-containing protein							AT5G60050.1
Gorai.001G106000	3	35	11	26	19	130		PF00704	PTHR11177,PTHR11177:SF85				GO:0004553,GO:0005975
Gorai.001G106100	38	23	16	16	29	29	NADH-Ubiquinone/plastoquinone (complex I) protein	PF00361					GO:0008137,GO:0042773,GO:0055114	ATCG00890.1
Gorai.001G106200	7	11	11	26	19	28	Embryo-specific protein 3, (ATS3)	PF06232						AT2G41475.1
Gorai.001G106300	none	13	none	22	none	48
Gorai.001G106400	6	6	7	0	40	1	Class II aaRS and biotin synthetases superfamily protein	PF09180	PTHR11451				GO:0000166,GO:0004827,GO:0005524,GO:0006433,GO:0005737,GO:0006412	AT3G62120.1
Gorai.001G106600	19	15	14	1	95	16	CCT motif family protein	PF06203					GO:0005515	AT5G59990.1
Gorai.001G106700	3	none	22	none	4	none	HSP20-like chaperones superfamily protein	PF00011	PTHR11527,PTHR11527:SF14	KOG3591				AT1G07400.1
Gorai.001G106800	33	8	5	6	51	34	ER-type Ca2+-ATPase 1	PF00689,PF00702,PF00690,PF00122	PTHR24093:SF91,PTHR24093	KOG0202	3.6.3.8	K01537	GO:0000166,GO:0046872,GO:0003824,GO:0008152,GO:0016020,GO:0015662,GO:0006812,GO:0006754	AT1G07810.1
Gorai.001G106900	8	3	1	1	0	4								AT5G02640.1
Gorai.001G107000	14	2	1	1	39	1	hercules receptor kinase 1	PF07714	PTHR24420:SF785,PTHR24420	KOG1187			GO:0004672,GO:0005524,GO:0006468	AT3G46290.1
Gorai.001G107200	3	7	53	1	4	4	Ankyrin repeat family protein	PF00023	PTHR24186,PTHR24186:SF119	KOG4412			GO:0005515	AT1G07710.1
Gorai.001G107300	5	5	1	5	1	1	3-ketoacyl-CoA synthase 12	PF08392,PF08541					GO:0016746,GO:0016747,GO:0006633,GO:0016020,GO:0008610,GO:0004315	AT2G28630.1
Gorai.001G107400	4	8	9	9	2	0	exocyst subunit exo70 family protein H7	PF03081	PTHR12542,PTHR12542:SF7	KOG2344			GO:0006887,GO:0000145	AT5G59730.1
Gorai.001G107500	none	28	none	14	none	134	Heavy metal transport/detoxification superfamily protein	PF00403	PTHR22814,PTHR22814:SF50	KOG1603			GO:0046872,GO:0030001	AT5G02600.1
Gorai.001G107600	5	5	5	5	33	1	ribosomal protein L23AB	PF00276,PF03939	PTHR11620	KOG1751			GO:0003735,GO:0006412,GO:0005840,GO:0005622	AT3G55280.1
Gorai.001G107700	3	15	13	13	76	4	RING/U-box superfamily protein	PF00097	PTHR14155:SF30,PTHR14155					AT1G72220.1
Gorai.001G107800	9	3	1	31	102	0	Protein of unknown function (DUF1635)	PF07795						AT2G28690.1
Gorai.001G107900	4	3	9	39	31	19	myb domain protein 48	PF00249	PTHR10641	KOG0048		K09422	GO:0003677	AT3G46130.1
Gorai.001G108000	1	3	0	10	66	4	Domain of unknown function (DUF966)	PF06136						AT5G59790.1
Gorai.001G108200	5	5	2	10	1	1	ribosomal protein S15A	PF00410	PTHR11758	KOG1754		K02957	GO:0003735,GO:0006412,GO:0005622,GO:0005840	AT1G07770.1
Gorai.001G108300	3	3	20	2	4	21	Histone superfamily protein	PF00125	PTHR23428	KOG1744		K11252	GO:0003677,GO:0006334,GO:0005634,GO:0000786	AT3G45980.1
Gorai.001G108400	11	3	4	11	0	0								AT2G37530.1
Gorai.001G108500	11	11	1	0	1	29	RNA-binding (RRM/RBD/RNP motifs) family protein	PF00076	PTHR19965	KOG0533			GO:0003676	AT5G59950.5
Gorai.001G108600	61	61	44	45	1	0								AT2G28780.1
Gorai.001G108700	19	13	12	4	4	43	dessication-induced 1VOC superfamily protein							AT1G07645.1
Gorai.001G108800	12	12	17	4	7	10	ubiquitin-conjugating enzyme 13	PF00179	PTHR24067	KOG0425	6.3.2.19	K10575	GO:0016881	AT3G46460.1
Gorai.001G108900	none	65	none	11	none	19	WUSCHEL related homeobox 2	PF00046					GO:0003700,GO:0043565,GO:0006355	AT5G59340.1
Gorai.001G109000	5	none	50	none	3	none
Gorai.001G109100	3	3	2	35	0	4								AT5G59350.1
Gorai.001G109200	2	2	1	1	1	1	lysophosphatidyl acyltransferase 2		PTHR10983,PTHR10983:SF1					AT3G57650.1
Gorai.001G109300	4	4	0	8	46	2	Dof-type zinc finger DNA-binding family protein	PF02701					GO:0003677,GO:0008270,GO:0006355	AT2G28810.1
Gorai.001G109400	4	36	4	1	2	4	plasmodesmata-located protein 7	PF01657	PTHR11795:SF83,PTHR11795					AT5G37660.1
Gorai.001G109500	5	18	5	2	3	1	plant U-box 13	PF00514,PF04564	PTHR23315:SF31,PTHR23315				GO:0005515,GO:0004842,GO:0016567,GO:0000151	AT3G46510.1
Gorai.001G109600	6	2	35	21	1	53	SNF1-related protein kinase 2.1	PF00069	PTHR24343,PTHR24343:SF58				GO:0004672,GO:0005524,GO:0006468	AT5G08590.1
Gorai.001G109800	14	14	56	0	0	100	51 kDa subunit of complex I	PF10589,PF10531,PF01512	PTHR11780	KOG2658	1.6.5.3,1.6.99.3	K03942	GO:0016651,GO:0051539,GO:0055114,GO:0051287,GO:0010181	AT5G08530.1
Gorai.001G109900	20	13	10	2	98	7	SEC12P-like 2 protein	PF00400	PTHR23284	KOG0771		K14003	GO:0005515	AT2G01470.1
Gorai.001G110000	28	28	19	9	96	34	HSP20-like chaperones superfamily protein	PF00011	PTHR11527,PTHR11527:SF14	KOG0710				AT1G53540.1
Gorai.001G110100	13	13	3	2	89	50	XB3 ortholog 1 in Arabidopsis thaliana	PF00023	PTHR24158,PTHR24158:SF306	KOG4412			GO:0005515	AT2G28840.1
Gorai.001G110200	8	2	1	53	3	1								AT5G02440.1
Gorai.001G110300	0	16	24	4	0	17								AT5G02420.1
Gorai.001G110400	2	8	12	10	4	85	actin 3	PF00022	PTHR11937,PTHR11937:SF77	KOG0676		K10355		AT3G53750.1
Gorai.001G110500	2	2	2	5	1	1	Fasciclin-like arabinogalactan family protein	PF02469	PTHR10900:SF23,PTHR10900					AT3G46550.1
Gorai.001G110600	3	13	2	5	3	0	Tetratricopeptide repeat (TPR)-like superfamily protein	PF01535	PTHR24015					AT1G07590.1
Gorai.001G110700	51	18	1	18	1	1	outer plastid envelope protein 16-1	PF02466					GO:0015031,GO:0008565,GO:0005743	AT2G28900.1
Gorai.001G110800	50	50	4	4	79	8	CAX interacting protein 4			KOG2985				AT2G28910.1
Gorai.001G110900	46	none	11	none	0	none	methyl-CPG-binding domain 6	PF01429					GO:0003677,GO:0005634	AT5G59380.1
Gorai.001G111100	16	16	1	4	12	12	expansin A4	PF01357,PF03330						AT2G39700.1
Gorai.001G111200	39	11	30	4	3	10	Exostosin family protein	PF03016	PTHR11062,PTHR11062:SF27	KOG1021			GO:0016020	AT2G29040.1
Gorai.001G111300	4	2	2	1	13	86								AT5G59400.1
Gorai.001G111400	5	11	9	12	48	4	Rab5-interacting family protein	PF07019	PTHR12906	KOG3415				AT5G59410.1
Gorai.001G111500	41	7	3	6	2	82	SCARECROW-like 14	PF03514						AT1G07530.1
Gorai.001G111600	1	1	4	4	17	8	SCARECROW-like 14	PF03514						AT1G07530.1
Gorai.001G111700	26	57	11	46	140	0	cytochrome P450, family 707, subfamily A, polypeptide 2	PF00067	PTHR24286,PTHR24286:SF63	KOG0157	1.14.13.93	K09843	GO:0005506,GO:0009055,GO:0016705,GO:0020037,GO:0055114	AT2G29090.1
Gorai.001G111800	71	none	11	none	101	none
Gorai.001G111900	2	34	19	8	0	37	zinc finger (C3HC4-type RING finger) family protein	PF06547,PF00097	PTHR22763	KOG1493				AT3G46620.1
Gorai.001G112000	16	1	3	3	17	2	pumilio 1	PF00806,PF07990	PTHR12537:SF12,PTHR12537	KOG1488			GO:0003723	AT2G29200.1
Gorai.001G112100	4	4	13	2	21	13								AT2G29180.1
Gorai.001G112200	1	1	7	2	52	46	Homeodomain-like superfamily protein	PF00249					GO:0003677	AT3G46640.1
Gorai.001G112300	2	8	7	7	23	22	translocon at the outer envelope membrane of chloroplasts 75-III	PF07244,PF01103	PTHR12815,PTHR12815:SF6				GO:0019867	AT3G46740.1
Gorai.001G112500	11	12	19	19	8	113	Transcription factor IIA, alpha/beta subunit	PF03153	PTHR12694:SF2,PTHR12694	KOG2652		K03122	GO:0006367,GO:0005672,GO:0003702	AT1G07470.1
Gorai.001G112600	48	0	0	1	9	6	plastid transcriptionally active 16	PF05368	PTHR14194,PTHR14194:SF18	KOG1203				AT3G46780.1
Gorai.001G112800	1	11	29	4	30	10	type one serine/threonine protein phosphatase 2	PF00149	PTHR11668,PTHR11668:SF136	KOG0374	3.1.3.16	K01090	GO:0016787	AT5G59160.1
Gorai.001G112900	58	2	38	1	0	1	metal tolerance protein B1	PF01545	PTHR11562	KOG1482			GO:0008324,GO:0006812,GO:0055085,GO:0016021	AT2G29410.1
Gorai.001G113000	2	2	2	2	1	1	RAB GTPase homolog A2B	PF00071	PTHR24073,PTHR24073:SF213	KOG0087		K07976	GO:0003924,GO:0005525,GO:0007264,GO:0005622	AT1G07410.1
Gorai.001G113100	22	none	33	none	0	none	HSP20-like chaperones superfamily protein							AT1G07400.1
Gorai.001G113200	2	0	5	32	90	4	UDP-glucosyl transferase 76E2	PF00201	PTHR11926,PTHR11926:SF15	KOG1192			GO:0016758,GO:0008152	AT5G59590.1
Gorai.001G113300	none	3	none	18	none	92	UDP-glucosyl transferase 76E2	PF00201	PTHR11926,PTHR11926:SF15	KOG1192			GO:0016758,GO:0008152	AT5G59590.1
Gorai.001G113500	1	1	9	9	25	25	maternal effect embryo arrest 60							AT5G05950.1
Gorai.001G113600	3	3	21	6	40	11	ARM repeat superfamily protein	PF00514	PTHR23315:SF27,PTHR23315	KOG4646			GO:0005515	AT5G37290.1
Gorai.001G113800	1	1	2	19	55	8	UDP-Glycosyltransferase superfamily protein	PF00201	PTHR11926,PTHR11926:SF15	KOG1192			GO:0016758,GO:0008152	AT3G11340.1
Gorai.001G113900	21	17	8	10	47	72	UDP-Glycosyltransferase superfamily protein	PF00201	PTHR11926,PTHR11926:SF15	KOG1192			GO:0016758,GO:0008152	AT3G11340.1
Gorai.001G114000	12	48	19	20	7	90	UDP-glucosyl transferase 76E2	PF00201	PTHR11926,PTHR11926:SF15	KOG1192			GO:0016758,GO:0008152	AT5G59590.1
Gorai.001G114100	31	31	4	11	96	105	HSP20-like chaperones superfamily protein	PF00011	PTHR11527,PTHR11527:SF14	KOG0710				AT1G53540.1
Gorai.001G114200	31	none	26	none	130	none	HSP20-like chaperones superfamily protein	PF00011	PTHR11527,PTHR11527:SF14					AT1G07400.1
Gorai.001G114300	31	73	11	4	105	18	HSP20-like chaperones superfamily protein	PF00011	PTHR11527	KOG3591				AT1G07400.1
Gorai.001G114400	45	2	4	25	1	99	Protein kinase protein with tetratricopeptide repeat domain	PF07714	PTHR24420:SF457,PTHR24420				GO:0004672,GO:0005524,GO:0006468	AT5G59010.2
Gorai.001G114500	12	12	19	3	8	80								AT5G52370.1
Gorai.001G114600	12	5	0	1	7	1	uncoupling protein 2	PF00153	PTHR24089:SF28,PTHR24089	KOG0753				AT5G58970.1
Gorai.001G114700	4	2	1	16	62	0	ribonuclease P family protein / Rpp14 family protein	PF01900	PTHR10993,PTHR10993:SF1	KOG4639	3.1.26.5	K03537	GO:0004540,GO:0008033	AT1G04635.1
Gorai.001G114800	5	2	5	5	3	62	calmodulin-binding receptor-like cytoplasmic kinase 1	PF00069	PTHR24420:SF813,PTHR24420	KOG1187			GO:0004672,GO:0005524,GO:0006468	AT5G58940.1
Gorai.001G114900	4	41	20	16	24	71	Protein of unknown function (DUF740)	PF05340						AT5G58930.1
Gorai.001G115000	16	none	4	none	17	none	josephin protein-related							AT1G07300.1
Gorai.001G115100	10	10	1	1	1	1	cytochrome P450, family 86, subfamily A, polypeptide 1	PF00067	PTHR24296	KOG0157	1.14.-.-	K00517	GO:0005506,GO:0009055,GO:0016705,GO:0020037,GO:0055114	AT5G58860.1
Gorai.001G115200	2	8	1	4	1	14	zinc finger (C2H2 type) family protein							AT2G29660.1
Gorai.001G115300	9	9	6	8	27	47	myb domain protein 119	PF00249	PTHR10641	KOG0048		K09422	GO:0003677	AT5G58850.1
Gorai.001G115400	7	7	2	1	15	4	Tetratricopeptide repeat (TPR)-like superfamily protein		PTHR23083,PTHR23083:SF161					AT2G29670.1
Gorai.001G115500	12	2	2	8	7	0	anthranilate synthase 2	PF00425,PF04715	PTHR11236,PTHR11236:SF9	KOG1223	4.1.3.27	K01657	GO:0016833,GO:0009058	AT2G29690.1
Gorai.001G115600	5	1	2	4	7	106	pleckstrin homologue 1	PF00169	PTHR22903				GO:0005515,GO:0005543	AT2G29700.1
Gorai.001G115700	11	13	15	4	14	1	pleiotropic drug resistance 3	PF01061,PF08370,PF00005	PTHR19241,PTHR19241:SF10	KOG0065			GO:0005524,GO:0016887,GO:0016020	AT2G29940.1
Gorai.001G116000	6	4	2	3	1	2	pleiotropic drug resistance 3	PF01061,PF08370,PF00005	PTHR19241,PTHR19241:SF10	KOG0065			GO:0005524,GO:0016887,GO:0016020	AT2G29940.1
Gorai.001G116100	7	4	0	3	34	9	smr (Small MutS Related) domain-containing protein	PF08590,PF01713						AT5G58720.1
Gorai.001G116200	2	2	1	2	1	1	Arabidopsis thaliana protein of unknown function (DUF821)	PF05686	PTHR12203:SF11,PTHR12203	KOG2458				AT1G07220.1
Gorai.001G116300	44	none	26	none	0	none	Heavy metal transport/detoxification superfamily protein	PF00403	PTHR22814,PTHR22814:SF15	KOG1603			GO:0046872,GO:0030001	AT1G06330.1
Gorai.001G116400	8	3	10	2	15	15	zinc finger (CCCH-type) family protein	PF00023	PTHR14493:SF3,PTHR14493	KOG1595			GO:0005515	AT5G58620.1
Gorai.001G116500	1	32	6	36	5	79	fatty acid desaturase 8	PF00487,PF11960	PTHR19353,PTHR19353:SF7		1.14.19.-	K10257	GO:0006629,GO:0016717,GO:0055114,GO:0016491	AT5G05580.1
Gorai.001G116600	1	1	6	9	2	2	alternative NAD(P)H dehydrogenase 2	PF07992,PF00070	PTHR22915:SF4,PTHR22915	KOG2495			GO:0016491,GO:0050660,GO:0055114	AT2G29990.1
Gorai.001G116700	16	2	1	5	14	4	PHD finger transcription factor, putative	PF00628,PF05641					GO:0005515,GO:0003723	AT5G58610.1
Gorai.001G116800	16	16	11	11	0	0
Gorai.001G116900	8	7	1	2	4	15	Plant protein of unknown function (DUF828)	PF03005	PTHR13533,PTHR13533:SF3					AT5G58600.1
Gorai.001G117000	0	19	4	13	52	118	glutamine-dependent asparagine synthase 1	PF00733	PTHR11772	KOG0571	6.3.5.4	K01953	GO:0004066,GO:0006529	AT3G47340.1
Gorai.001G117100	1	1	4	3	8	2	C2H2-type zinc finger family protein		PTHR26374,PTHR26374:SF459	KOG2462				AT2G28200.1
Gorai.001G117200	1	19	6	6	5	2	Pheophorbide a oxygenase family protein with Rieske [2Fe-2S] domain	PF08417,PF00355	PTHR21266,PTHR21266:SF3		1.14.12.20	K13071	GO:0016491,GO:0051537,GO:0055114,GO:0010277	AT3G44880.1
Gorai.001G117300	1	1	3	7	2	6	DNA-binding storekeeper protein-related transcriptional regulator	PF04504						AT1G61730.1
Gorai.001G117400	18	3	1	2	4	21	CDK-subunit 2	PF01111	PTHR23415,PTHR23415:SF10	KOG3484		K02219	GO:0016538,GO:0007049	AT2G27970.1
Gorai.001G117500	7	10	43	43	11	11	Acyl-CoA N-acyltransferase with RING/FYVE/PHD-type zinc finger domain	PF00628					GO:0005515	AT2G27980.1
Gorai.001G117600	14	1	4	4	97	128	Ring/U-Box superfamily protein		PTHR12183,PTHR12183:SF2	KOG4172				AT2G27950.1
Gorai.001G117700	9	3	22	15	6	102
Gorai.001G117800	none	10	none	1	none	57
Gorai.001G117900	1	3	31	13	0	21	PLATZ transcription factor family protein	PF04640						AT2G27930.1
Gorai.001G118000	3	3	42	42	35	35								AT5G56368.1
Gorai.001G118100	6	2	1	7	1	3	geranyl diphosphate synthase 1	PF00348	PTHR12001,PTHR12001:SF19	KOG0776			GO:0008299	AT2G34630.2
Gorai.001G118200	2	2	21	1	11	1		PF10475						AT2G27900.1
Gorai.001G118400	10	2	7	1	40	1		PF05176		KOG4614			GO:0033615,GO:0005743	AT1G08220.1
Gorai.001G118500	2	9	1	9	1	21	Eukaryotic aspartyl protease family protein	PF00026	PTHR13683,PTHR13683:SF98	KOG1339	2.7.1.-	K00924	GO:0004190,GO:0006508	AT5G22850.1
Gorai.001G118600	10	20	6	1	9	86	ARM repeat superfamily protein							AT5G22820.2
Gorai.001G118700	10	6	1	8	57	68	GDSL-like Lipase/Acylhydrolase superfamily protein	PF00657	PTHR22835,PTHR22835:SF39				GO:0016788,GO:0006629	AT5G22810.1
Gorai.001G118800	27	5	5	5	3	3	Lecithin:cholesterol acyltransferase family protein	PF02450	PTHR11440,PTHR11440:SF6				GO:0008374,GO:0006629,GO:0004607	AT3G44830.1
Gorai.001G118900	2	11	1	0	1	59	UDP-D-apiose/UDP-D-xylose synthase 2	PF01370	PTHR10366,PTHR10366:SF147	KOG1429		K12449	GO:0003854,GO:0016616,GO:0006694,GO:0055114,GO:0003824,GO:0050662,GO:0044237,GO:0009058	AT1G08200.1
Gorai.001G119000	2	5	1	5	1	3	Phototropic-responsive NPH3 family protein	PF03000	PTHR13690:SF174,PTHR13690				GO:0004871,GO:0009416	AT3G44820.1
Gorai.001G119100	3	4	42	14	35	6	AT hook motif DNA-binding family protein	PF03479						AT2G45850.1
Gorai.001G119300	34	4	9	9	31	31								AT2G27830.1
Gorai.001G119400	3	3	8	7	32	44	MORN (Membrane Occupation and Recognition Nexus) repeat-containing protein	PF02493	PTHR23084,PTHR23084:SF32					AT5G22640.1
Gorai.001G119500	3	6	5	20	23	1	MORN (Membrane Occupation and Recognition Nexus) repeat-containing protein	PF02493	PTHR23084,PTHR23084:SF32					AT5G22640.1
Gorai.001G119600	8	3	26	10	88	0	PHYTOSULFOKINE 3 PRECURSOR	PF06404					GO:0008083,GO:0008283,GO:0005576	AT3G44735.1
Gorai.001G119700	5	8	28	22	3	4	unknown seed protein like 1	PF03181						AT1G49320.1
Gorai.001G119800	2	2	5	5	3	3	nucleobase-ascorbate transporter 12	PF00860	PTHR11119,PTHR11119:SF8	KOG1292			GO:0005215,GO:0006810,GO:0055085,GO:0016020	AT2G27810.1
Gorai.001G119900	0	3	1	1	12	28								AT2G27775.1
Gorai.001G120000	0	7	12	15	15	1	Plant protein of unknown function (DUF868)	PF05910						AT2G27770.1
Gorai.001G120100	none	66	none	31	none	0	UDP-Glycosyltransferase superfamily protein	PF00201	PTHR11926,PTHR11926:SF15				GO:0016758,GO:0008152	AT5G49690.1
Gorai.001G120200	1	15	9	9	25	31	Protein of unknown function (DUF567)	PF04525	PTHR10233,PTHR10233:SF7				GO:0044237	AT2G38640.1
Gorai.001G120300	2	4	4	39	14	0	Family of unknown function (DUF662)	PF04949	PTHR21470					AT2G27740.1
Gorai.001G120400	7	3	2	42	15	35		PF03468						AT3G22430.1
Gorai.001G120500	6	6	1	1	18	18	TBP-associated factor 15	PF00076	PTHR12999,PTHR12999:SF1				GO:0003676	AT1G50300.1
Gorai.001G120600	11	11	1	2	1	1	Protein kinase superfamily protein	PF00069	PTHR24353,PTHR24353:SF88	KOG0610			GO:0004672,GO:0005524,GO:0006468	AT3G44610.1
Gorai.001G120700	1	2	8	5	63	4	cyclophilin71	PF00400,PF00160	PTHR11071,PTHR11071:SF40	KOG0882	5.2.1.8	K12736	GO:0003755,GO:0006457,GO:0005515	AT3G44600.1
Gorai.001G120800	1	11	19	17	2	10	60S acidic ribosomal protein family	PF00428	PTHR21141	KOG3449		K02943	GO:0003735,GO:0006414,GO:0005622,GO:0005840	AT3G44590.1
Gorai.001G120900	4	20	1	29	16	74								AT4G04190.1
Gorai.001G121000	3	2	1	1	1	26	Pentatricopeptide repeat (PPR) superfamily protein	PF01535	PTHR24015:SF124,PTHR24015					AT4G13650.1
Gorai.001G121100	3	4	6	2	11	13	proteinaceous RNase P 2	PF11977	PTHR11206:SF1,PTHR11206	KOG1347			GO:0055085,GO:0016020,GO:0015297,GO:0015238,GO:0006855	AT2G16650.1
Gorai.001G121200	2	2	1	2	1	1	Jojoba acyl CoA reductase-related male sterility protein	PF07993,PF03015	PTHR11011,PTHR11011:SF1	KOG1221			GO:0003854,GO:0016616,GO:0006694,GO:0055114,GO:0003824,GO:0050662,GO:0044237,GO:0016620	AT4G33790.1
Gorai.001G121300	2	5	1	1	1	1	Tetratricopeptide repeat (TPR)-like superfamily protein	PF01535	PTHR24015,PTHR24015:SF154					AT2G27610.1
Gorai.001G121400	1	1	7	14	64	84	AAA-type ATPase family protein	PF04212,PF09336,PF00004	PTHR23074,PTHR23074:SF4	KOG0739			GO:0005524,GO:0009378,GO:0006281,GO:0006310,GO:0016887	AT2G27600.1
Gorai.001G121500	1	4	3	3	2	2	A20/AN1-like zinc finger family protein	PF01754,PF01428	PTHR10634	KOG3173			GO:0008270,GO:0003677	AT2G27580.1
Gorai.001G121600	1	1	3	2	2	24	Glycosyltransferase family 29 (sialyltransferase) family protein	PF00777	PTHR13713:SF31,PTHR13713	KOG2692			GO:0008373,GO:0006486,GO:0030173	AT1G08280.1
Gorai.001G121700	1	0	32	25	0	16	WIP domain protein 3		PTHR10593:SF10,PTHR10593					AT1G08290.1
Gorai.001G121900	12	20	0	2	113	98	alpha/beta-Hydrolases superfamily protein	PF00561	PTHR10992,PTHR10992:SF198	KOG1454				AT5G22460.1
Gorai.001G122000	4	19	3	6	2	149	Fatty acid hydroxylase superfamily	PF12076,PF04116	PTHR11863,PTHR11863:SF1				GO:0005506,GO:0016491,GO:0006633,GO:0055114	AT1G02205.2
Gorai.001G122100	16	1	15	54	17	0	bZIP transcription factor family protein	PF00170	PTHR22952:SF50,PTHR22952				GO:0003700,GO:0043565,GO:0046983,GO:0006355	AT1G08320.1
Gorai.001G122200	5	2	23	18	1	65	F-box/RNI-like superfamily protein							AT1G67190.1
Gorai.001G122300	11	60	28	45	0	161	Glycosyl hydrolase superfamily protein	PF00332	PTHR16631				GO:0004553,GO:0005975	AT2G27500.1
Gorai.001G122400	1	1	6	19	5	36	cytochrome c oxidase assembly protein CtaG / Cox11 family	PF04442	PTHR21320			K02258	GO:0005507	AT1G02410.1
Gorai.001G122500	1	1	6	3	2	2	Rho GTPase activating protein with PAK-box/P21-Rho-binding domain	PF00620,PF00786	PTHR23177:SF2,PTHR23177				GO:0007165,GO:0005622,GO:0005515	AT5G22400.1
Gorai.001G122600	1	1	3	3	2	2	Protein of unknown function (DUF3049)	PF11250						AT5G22390.1
Gorai.001G122700	1	1	19	2	2	24	Late embryogenesis abundant (LEA) hydroxyproline-rich glycoprotein family	PF03168						AT3G44380.1
Gorai.001G122800	0	7	8	1	5	16	NAC domain containing protein 61	PF02365					GO:0003677,GO:0006355	AT3G44350.2
Gorai.001G122900	14	14	1	5	39	39	Protein of unknown function (DUF1022)	PF06258						AT5G22350.1
Gorai.001G123000	1	1	18	6	66	5	OTU-like cysteine protease family protein	PF02338	PTHR12419					AT2G27350.3
Gorai.001G123100	none	1	none	34	none	7	F-box family protein							AT2G27310.1
Gorai.001G123200	54	11	14	14	0	0	photosystem I subunit O					K14332		AT1G08380.1
Gorai.001G123300	8	2	3	7	54	3								AT3G11590.1
Gorai.001G123400	12	1	9	5	0	25	nitrilase 4	PF00795	PTHR23088	KOG0805	3.5.5.1,3.5.5.4	K13035	GO:0016810,GO:0006807	AT5G22300.1
Gorai.001G123500	16	20	4	1	12	86								AT3G11600.1
Gorai.001G123600	2	1	16	19	67	2	Polynucleotidyl transferase, ribonuclease H-like superfamily protein	PF04857	PTHR10797	KOG0304			GO:0005634	AT3G44260.1
Gorai.001G123700	2	5	1	5	1	3	ovate family protein 13	PF04844						AT5G04820.1
Gorai.001G123800	10	3	0	0	3	16	Protein of unknown function (DUF1279)	PF06916	PTHR21377					AT2G27290.1
Gorai.001G123900	1	1	3	18	0	66	E2F transcription factor 1	PF02319	PTHR12081,PTHR12081:SF18	KOG2577			GO:0003700,GO:0006355,GO:0005667	AT5G22220.2
Gorai.001G124000	5	13	1	2	59	50								AT5G22210.1
Gorai.001G124100	5	1	1	0	1	50	Coiled-coil domain-containing protein 55 (DUF2040)	PF09745		KOG2117				AT2G27285.1
Gorai.001G124200	2	15	10	25	3	38
Gorai.001G124400	none	5	none	11	none	49	Late embryogenesis abundant (LEA) hydroxyproline-rich glycoprotein family	PF03168						AT3G44220.1
Gorai.001G124500	4	0	9	9	9	0	Late embryogenesis abundant (LEA) hydroxyproline-rich glycoprotein family	PF03168						AT2G27260.1
Gorai.001G124600	5	5	5	7	1	3		PF05291	PTHR12821	KOG3871				AT1G31660.1
Gorai.001G124700	none	1	none	51	none	41
Gorai.001G124800	14	1	13	1	107	52	NIMA (never in mitosis, gene A)-related 6	PF00069	PTHR24362,PTHR24362:SF158	KOG0589	2.7.11.1	K08857	GO:0004672,GO:0005524,GO:0006468	AT3G44200.1
Gorai.001G125000	1	none	4	none	8	none
Gorai.001G125100	7	52	26	11	0	165	FAD/NAD(P)-binding oxidoreductase family protein	PF07992,PF00070	PTHR22915,PTHR22915:SF5	KOG2495			GO:0016491,GO:0050660,GO:0055114	AT3G44190.1
Gorai.001G125200	13	1	5	6	7	5	Leucine-rich repeat protein kinase family protein	PF00069,PF00560,PF08263	PTHR24420,PTHR24420:SF467	KOG1187			GO:0004672,GO:0005524,GO:0006468,GO:0005515	AT2G01820.1
Gorai.001G125300	3	15	9	9	31	31	Aluminium activated malate transporter family protein	PF11744					GO:0006810,GO:0005886,GO:0010044	AT1G08440.1
Gorai.001G125400	16	6	9	17	19	1	BEL1-like homeodomain 1	PF07526,PF00046	PTHR11850:SF14,PTHR11850	KOG0773			GO:0003700,GO:0043565,GO:0006355,GO:0003677,GO:0005634	AT2G35940.1
Gorai.001G125500	3	3	36	36	35	35
Gorai.001G125600	62	1	36	46	7	119
Gorai.001G125700	none	26	none	47	none	0	plant U-box 24	PF04564	PTHR13931,PTHR13931:SF9				GO:0004842,GO:0016567,GO:0000151	AT3G11840.1
Gorai.001G125800	0	none	24	none	6	none	hAT dimerisation domain-containing protein	PF04937,PF02892					GO:0003677	AT3G17450.1
Gorai.001G126000	1	1	8	13	5	5	Protein of unknown function (DUF3049)	PF11250						AT5G22090.1
Gorai.001G126200	5	1	0	3	58	0	DNAJ homologue 2	PF00684,PF00226,PF01556	PTHR24076	KOG0712			GO:0031072,GO:0051082,GO:0006457	AT5G22060.1
Gorai.001G126300	3	2	1	1	4	1	Protein kinase superfamily protein	PF07714	PTHR24420,PTHR24420:SF872	KOG1187			GO:0004672,GO:0005524,GO:0006468	AT5G22050.2
Gorai.001G126400	2	2	15	7	1	1	MD-2-related lipid recognition domain-containing protein / ML domain-containing protein	PF02221	PTHR11306	KOG4680				AT3G11780.1
Gorai.001G126500	1	4	9	1	45	21	thylakoid lumenal P17.1 protein							AT3G44020.1
Gorai.001G126600	21	70	27	28	83	3	SCR-like 11	PF06876					GO:0007165	AT4G15733.1
Gorai.001G126700	0	4	9	6	89	2	RING-H2 group F2A	PF00097	PTHR22764,PTHR22764:SF49	KOG1493				AT5G22000.1
Gorai.001G126800	0	6	8	8	148	68	CCT motif -containing response regulator protein	PF00072	PTHR26402:SF303,PTHR26402				GO:0000156,GO:0000160,GO:0006355	AT5G61380.1
Gorai.001G126900	5	2	5	5	3	3	strictosidine synthase-like 3	PF03088	PTHR10426:SF5,PTHR10426	KOG1520			GO:0016844,GO:0009058	AT1G08470.1
Gorai.001G127000	1	7	18	1	66	62	Plant-specific transcription factor YABBY family protein	PF04690						AT1G08465.1
Gorai.001G127100	5	5	1	5	39	56	ubiquitin-specific protease 12	PF00443,PF00917,PF12436	PTHR24006,PTHR24006:SF110	KOG1863	3.1.2.15	K11838	GO:0004221,GO:0006511,GO:0005515	AT5G06600.1
Gorai.001G127200	10	2	3	1	73	1	BSD domain (BTF2-like transcription factors, Synapse-associated proteins and DOS2-like proteins)	PF03909	PTHR12856	KOG2074		K03141		AT1G55750.1
Gorai.001G127300	3	7	1	1	16	3	Protein kinase superfamily protein	PF00069	PTHR22974:SF1,PTHR22974	KOG1151	2.7.11.1	K08864	GO:0004672,GO:0005524,GO:0006468	AT5G20930.1
Gorai.001G127400	8	7	14	40	0	16
Gorai.001G127500	5	0	0	3	29	34	AtGCP3 interacting protein 1	PF12554						AT4G09550.1
Gorai.001G127600	10	10	10	36	1	15	Glycosyl hydrolase family protein	PF00933,PF01915					GO:0004553,GO:0005975	AT5G20950.1
Gorai.001G127700	2	3	8	36	32	0	Glycosyl hydrolase family protein	PF00933					GO:0004553,GO:0005975	AT5G20950.1
Gorai.001G127800	1	51	13	13	46	29	aldehyde oxidase 4	PF02738,PF01315,PF03450,PF01799,PF00941,PF00111	PTHR11908,PTHR11908:SF15	KOG0430	1.2.3.14	K09842	GO:0009055,GO:0051536,GO:0016491,GO:0055114,GO:0046872	AT1G04580.1
Gorai.001G127900	43	43	27	27	0	0	dsRNA-binding protein 2	PF00035					GO:0003725,GO:0005622	AT2G28380.1
Gorai.001G128100	1	5	17	17	8	7	calmodulin 5	PF00036	PTHR23050:SF20,PTHR23050	KOG0027		K02183	GO:0005509,GO:0007165,GO:0005578	AT2G27030.3
Gorai.001G128200	8	2	8	2	37	15	Cobalamin-independent synthase family protein	PF01717,PF08267	PTHR19960,PTHR19960:SF21	KOG2263	2.1.1.14	K00549	GO:0003871,GO:0009086,GO:0008270,GO:0008652	AT5G17920.1
Gorai.001G128500	none	53	none	46	none	19	serine carboxypeptidase-like 32	PF00450	PTHR11802,PTHR11802:SF8				GO:0004185,GO:0006508	AT1G61130.1
Gorai.001G128700	56	3	12	24	2	19	SGNH hydrolase-type esterase superfamily protein	PF00657	PTHR22835,PTHR22835:SF39				GO:0016788,GO:0006629	AT4G10950.1
Gorai.001G128800	1	12	0	4	17	10	Bifunctional inhibitor/lipid-transfer protein/seed storage 2S albumin superfamily protein	PF00234						AT3G43720.1
Gorai.001G128900	37	6	1	1	4	18	lipases;hydrolases, acting on ester bonds	PF02628,PF02714	PTHR13018:SF5,PTHR13018				GO:0016627,GO:0006784,GO:0055114,GO:0016020,GO:0006461	AT1G58520.2
Gorai.001G129000	18	2	5	4	0	121	NAD(P)-binding Rossmann-fold superfamily protein	PF00106	PTHR24322:SF19,PTHR24322	KOG1208			GO:0016491,GO:0008152	AT3G61220.1
Gorai.001G129100	3	0	11	9	120	0	nitrate excretion transporter1	PF00854	PTHR11654:SF19,PTHR11654	KOG1237			GO:0005215,GO:0006857,GO:0016020	AT3G45650.1
Gorai.001G129200	27	54	30	11	164	165								AT3G45200.1
Gorai.001G129300	2	8	1	7	3	125								AT5G60150.1
Gorai.001G129400	4	4	3	3	2	12	arogenate dehydratase 2	PF01842,PF00800	PTHR21022	KOG2797			GO:0004664,GO:0009094,GO:0016597,GO:0008152	AT3G07630.1
Gorai.001G129500	1	16	9	9	78	2	Dof-type zinc finger DNA-binding family protein	PF02701					GO:0003677,GO:0008270,GO:0006355	AT2G28510.1
Gorai.001G129600	4	7	1	8	16	71
Gorai.001G129700	3	43	0	33	34	14	LOB domain-containing protein 1	PF03195						AT1G07900.1
Gorai.001G129800	14	1	5	1	3	6	zinc finger (C3HC4-type RING finger) family protein	PF01485	PTHR11685,PTHR11685:SF18	KOG1812			GO:0008270	AT5G60250.1
Gorai.001G129900	5	1	2	2	1	7	Thioesterase superfamily protein	PF01575	PTHR13078,PTHR13078:SF14		2.7.4.3	K14535	GO:0016491,GO:0008152	AT5G60335.1
Gorai.001G130000	8	12	0	1	4	7
Gorai.001G130100	11	2	4	4	14	14	alpha/beta-Hydrolases superfamily protein	PF00561	PTHR10992,PTHR10992:SF238	KOG1454				AT3G09690.1
Gorai.001G130200	9	9	8	6	27	27	RmlC-like cupins superfamily protein	PF00190					GO:0045735	AT2G28490.1
Gorai.001G130300	5	5	2	1	7	1	PDI-like 5-1	PF00085	PTHR18929				GO:0045454	AT1G07960.1
Gorai.001G130400	6	6	1	1	1	1	RNA-binding KH domain-containing protein		PTHR11208,PTHR11208:SF25					AT1G09660.1
Gorai.001G130500	17	none	4	none	72	none	Preprotein translocase Sec, Sec61-beta subunit protein	PF03911	PTHR13509	KOG3457				AT5G60460.1
Gorai.001G130600	33	5	0	7	0	3	Flavodoxin family protein	PF00667,PF00175,PF00258	PTHR19384,PTHR19384:SF10	KOG1159			GO:0016491,GO:0055114,GO:0010181	AT3G02280.1
Gorai.001G130700	5	5	5	10	1	1	GTP binding Elongation factor Tu family protein	PF00009,PF03144,PF03143	PTHR23115:SF57,PTHR23115	KOG0052	3.6.5.3	K03231	GO:0003924,GO:0005525	AT1G07930.1
Gorai.001G130800	3	1	6	3	27	2	Seven transmembrane MLO family protein	PF03094					GO:0008219,GO:0016021	AT1G61560.1
Gorai.001G131000	7	39	6	6	34	9	indeterminate(ID)-domain 4		PTHR10593					AT2G02080.1
Gorai.001G131100	6	10	1	2	18	86	alpha/beta-Hydrolases superfamily protein							AT3G15650.2
Gorai.001G131200	1	1	41	6	5	5	FASCICLIN-like arabinogalactan-protein 11	PF02469	PTHR10900:SF23,PTHR10900					AT5G03170.1
Gorai.001G131300	41	15	0	7	34	23	nuclear factor Y, subunit C10	PF00808	PTHR10252,PTHR10252:SF23				GO:0003677,GO:0043565,GO:0005622	AT1G07980.1
Gorai.001G131400	2	17	2	5	1	23	Pentatricopeptide repeat (PPR) superfamily protein	PF01535	PTHR24015					AT5G18475.1
Gorai.001G131500	0	19	32	25	1	0	Peptidase S41 family protein	PF03572	PTHR18868:SF10,PTHR18868				GO:0008236,GO:0006508	AT4G17740.2
Gorai.001G131600	24	none	1	none	26	none	Tetratricopeptide repeat (TPR)-like superfamily protein	PF01535	PTHR24015					AT1G62930.1
Gorai.001G131700	none	9	none	26	none	69	Late embryogenesis abundant (LEA) protein-related	PF06830						AT5G60520.1
Gorai.001G131800	none	1	none	9	none	25	Leucine-rich repeat transmembrane protein kinase		PTHR24420:SF469,PTHR24420					AT1G56130.1
Gorai.001G131900	11	55	37	9	1	5	Leucine-rich repeat transmembrane protein kinase	PF11721,PF07714,PF00560	PTHR24420:SF469,PTHR24420	KOG1187			GO:0004672,GO:0005524,GO:0006468,GO:0005515	AT1G56130.1
Gorai.001G132000	9	3	31	11	0	19	geminivirus rep interacting kinase 2	PF00069	PTHR24347,PTHR24347:SF40	KOG0583			GO:0004672,GO:0005524,GO:0006468	AT5G60550.1
Gorai.001G132100	5	5	1	7	1	3	vacuolar protein sorting 26B	PF03643	PTHR12233	KOG3063			GO:0007034,GO:0030904	AT4G27690.1
Gorai.001G132200	8	3	1	2	4	3	CBL-interacting protein kinase 3	PF03822,PF00069	PTHR24345,PTHR24345:SF45	KOG0583			GO:0004672,GO:0005524,GO:0006468,GO:0007165	AT2G26980.4
Gorai.001G132300	25	25	16	16	29	29	photosynthetic electron transfer B	PF00033	PTHR19271				GO:0022904,GO:0016020,GO:0016491,GO:0009055	ATCG00720.1
Gorai.001G132400	5	5	0	2	39	1	proteasome family protein	PF01399	PTHR10678	KOG1464		K12176	GO:0005515	AT2G26990.1
Gorai.001G132500	2	5	7	1	1	10	beta-6 tubulin	PF03953,PF00091	PTHR11588	KOG1375		K07375	GO:0051258,GO:0043234,GO:0003924,GO:0005525,GO:0006184,GO:0007017,GO:0005874	AT5G12250.1
Gorai.001G132600	5	5	2	2	1	1	Ribosomal protein L30/L7 family protein	PF00327,PF08079	PTHR11524	KOG3184		K02937	GO:0003735,GO:0006412,GO:0005840	AT3G13580.1
Gorai.001G132700	0	0	23	7	98	29	Tetratricopeptide repeat (TPR)-like superfamily protein	PF01535	PTHR24015,PTHR24015:SF135					AT1G31790.1
Gorai.001G132800	1	5	23	1	36	3	molybdopterin biosynthesis MoaE family protein	PF02391	PTHR23404:SF2,PTHR23404	KOG3307	2.-.-.-	K03635	GO:0006777	AT2G43760.1
Gorai.001G132900	1	1	3	23	2	36	Galactose oxidase/kelch repeat superfamily protein	PF01344,PF00646	PTHR24412:SF249,PTHR24412				GO:0005515	AT5G26960.1
Gorai.001G133000	1	1	19	2	8	36	4-(cytidine 5\'-phospho)-2-C-methyl-D-erithritol kinase	PF00288	PTHR20861,PTHR20861:SF2		2.7.1.148	K00919	GO:0005524,GO:0016310,GO:0016301,GO:0050515,GO:0016114	AT2G26930.1
Gorai.001G133100	46	46	22	20	0	76	C2H2-type zinc finger family protein		PTHR26374,PTHR26374:SF459					AT2G26940.1
Gorai.001G133200	11	16	19	4	14	2	pyrimidine 2	PF01979	PTHR11647:SF1,PTHR11647	KOG2584	3.5.2.2	K01464	GO:0016787,GO:0003824,GO:0008152	AT5G12200.1
Gorai.001G133300	2	8	1	0	1	1
Gorai.001G133400	3	3	2	3	15	2
Gorai.001G133500	14	14	1	5	56	56	general control non-repressible 4	PF00005	PTHR19211:SF14,PTHR19211	KOG0066		K06184	GO:0005524,GO:0016887	AT3G54540.1
Gorai.001G133600	1	1	13	1	46	6	Phospholipase A2 family protein							AT4G29070.1
Gorai.001G133700	24	14	1	4	1	1	Telomerase activating protein Est1	PF10374	PTHR15696	KOG2162		K14409		AT5G19400.1
Gorai.001G133800	1	1	3	3	5	117	non-specific phospholipase C2	PF04185			3.1.4.3	K01114	GO:0016788	AT2G26870.1
Gorai.001G133900	0	71	11	5	0	3	Predicted AT-hook DNA-binding family protein	PF03479						AT5G49700.1
Gorai.001G134000	2	3	2	2	1	3	ankyrin repeat family protein	PF00023	PTHR24193	KOG4214			GO:0005515	AT5G12320.1
Gorai.001G134100	1	4	14	9	0	13	Lateral root primordium (LRP) protein-related	PF05142						AT5G12330.4
Gorai.001G134300	47	none	30	none	0	none								AT5G12340.1
Gorai.001G134400	2	2	21	2	1	1	Tetratricopeptide repeat (TPR)-like superfamily protein	PF01535	PTHR24015,PTHR24015:SF20					AT5G01110.1
Gorai.001G134500	13	0	18	29	104	143	Amino acid dehydrogenase family protein	PF00763,PF02882	PTHR10025	KOG0089			GO:0003824,GO:0004488,GO:0009396,GO:0055114	AT2G38660.1
Gorai.001G134600	4	20	3	7	2	67	signal peptide peptidase	PF04258	PTHR12174,PTHR12174:SF23	KOG2443	3.4.23.-	K09595	GO:0004190,GO:0016021	AT2G03120.1
Gorai.001G134700	4	0	9	10	13	4
Gorai.001G134800	1	2	4	4	16	0	Homeodomain-like superfamily protein	PF00046	PTHR24326,PTHR24326:SF77				GO:0003700,GO:0043565,GO:0006355	AT4G03250.1
Gorai.001G134900	8	8	1	1	1	0	Cytochrome P450 superfamily protein	PF00067	PTHR24298:SF44,PTHR24298	KOG0156			GO:0005506,GO:0009055,GO:0016705,GO:0020037,GO:0055114	AT5G07990.1
Gorai.001G135000	70	47	38	37	3	0	calcium-dependent protein kinase 17	PF00069,PF00036	PTHR24349,PTHR24349:SF13	KOG0032	2.7.1.-	K00924	GO:0004672,GO:0005524,GO:0006468	AT5G12180.1
Gorai.001G135100	2	2	5	18	3	65	rhodanese-like domain-containing protein / PPIC-type PPIASE domain-containing protein	PF00639,PF00581	PTHR10657:SF4,PTHR10657				GO:0016853	AT5G19370.1
Gorai.001G135200	6	6	32	32	7	7	ubiquitin-specific protease 16	PF00443					GO:0004221,GO:0006511	AT4G24560.1
Gorai.001G135300	2	2	32	10	3	3	Protein of unknown function (DUF1645)	PF07816						AT2G26530.1
Gorai.001G135400	2	10	5	7	3	40	Putative methyltransferase family protein	PF10294	PTHR23108					AT2G26810.3
Gorai.001G135500	6	2	17	23	0	1	Pentatricopeptide repeat (PPR) superfamily protein							AT4G14190.1
Gorai.001G135600	17	4	17	18	72	0	Aldolase superfamily protein	PF00682	PTHR10277:SF1,PTHR10277	KOG2368	4.1.3.4	K01640	GO:0003824	AT2G26800.1
Gorai.001G135700	2	5	1	5	1	3	Protein of unknown function (DUF803)	PF05653	PTHR12570	KOG2922			GO:0016020	AT1G34470.1
Gorai.001G135800	15	25	15	2	1	0	NAD(P)-binding Rossmann-fold superfamily protein		PTHR24320,PTHR24320:SF101					AT4G27760.1
Gorai.001G135900	15	2	8	1	92	4	NAD(P)-binding Rossmann-fold superfamily protein	PF00106	PTHR24320,PTHR24320:SF101	KOG1208			GO:0016491,GO:0008152	AT4G27760.1
Gorai.001G136000	5	5	8	23	0	1	indigoidine synthase A family protein	PF04227	PTHR10584				GO:0016798	AT1G50510.1
Gorai.001G136100	9	3	8	0	30	19	Bifunctional inhibitor/lipid-transfer protein/seed storage 2S albumin superfamily protein							AT4G33550.2
Gorai.001G136200	8	0	14	4	14	0	Gibberellin-regulated family protein	PF02704						AT1G74670.1
Gorai.001G136300	7	4	0	2	0	13	DNA binding;zinc ion binding;DNA binding	PF00628,PF02791	PTHR22880:SF56,PTHR22880				GO:0005515	AT5G12400.1
Gorai.001G136400	7	4	16	43	44	11	DNA binding;zinc ion binding;DNA binding	PF00628,PF02791	PTHR22880:SF56,PTHR22880				GO:0005515	AT5G12400.1
Gorai.001G136500	32	1	1	1	6	79	Ribonuclease H-like superfamily protein							AT2G02650.1
Gorai.001G136600	25	3	8	16	126	71	RNA polymerase subunit beta	PF04563,PF04561	PTHR20856:SF3,PTHR20856				GO:0003677,GO:0003899,GO:0006351,GO:0032549	ATCG00190.1
Gorai.001G136700	none	40	none	5	none	0	Plant stearoyl-acyl-carrier-protein desaturase family protein	PF03405					GO:0045300,GO:0006631,GO:0055114	AT2G43710.2
Gorai.001G136800	3	3	20	20	4	4	ubiquitin-conjugating enzyme19	PF00179	PTHR24067,PTHR24067:SF26	KOG0421	6.3.2.19	K06688	GO:0016881	AT3G20060.1
Gorai.001G136900	1	3	0	1	6	0	Saccharopine dehydrogenase	PF03435	PTHR12286				GO:0016491,GO:0008152,GO:0016620,GO:0051287,GO:0006520,GO:0055114,GO:0005737,GO:0003824,GO:0050662,GO:0044237	AT1G50450.1
Gorai.001G137100	8	8	5	1	3	3	RNA-binding (RRM/RBD/RNP motifs) family protein	PF00076,PF00642	PTHR24009				GO:0003676,GO:0008270	AT3G21100.2
Gorai.001G137200	5	5	1	18	7	100	Protein of unknown function (DUF59)	PF01883	PTHR12377	KOG3381				AT1G68310.2
Gorai.001G137300	1	1	4	1	7	6
Gorai.001G137400	6	6	10	10	18	18
Gorai.001G137600	49	1	29	10	5	0	Protein of unknown function (DUF3411)	PF11891						AT5G12470.1
Gorai.001G137700	25	3	8	34	68	61	NAD(P)-binding Rossmann-fold superfamily protein	PF01370	PTHR10366,PTHR10366:SF9				GO:0003854,GO:0016616,GO:0006694,GO:0055114,GO:0003824,GO:0050662,GO:0044237	AT1G51410.1
Gorai.001G137800	4	15	3	3	2	117	NAD(P)-binding Rossmann-fold superfamily protein	PF01370	PTHR10366,PTHR10366:SF9	KOG1502			GO:0016491,GO:0008152,GO:0003854,GO:0016616,GO:0006694,GO:0055114,GO:0003824,GO:0050662,GO:0044237	AT1G51410.1
Gorai.001G137900	12	3	6	5	89	23	sulfite reductase	PF03460,PF01077	PTHR11493:SF2,PTHR11493	KOG0560	1.8.7.1	K00392	GO:0016491,GO:0020037,GO:0051536,GO:0055114	AT5G04590.1
Gorai.001G138000	6	5	1	2	3	1	calcium-dependent protein kinase 19	PF00069,PF00036	PTHR24349,PTHR24349:SF13	KOG0032	2.7.11.1	K13412	GO:0004672,GO:0005524,GO:0006468	AT5G19450.1
Gorai.001G138300	2	2	1	1	1	1	CCCH-type zinc finger protein with ARM repeat domain	PF00023	PTHR14493,PTHR14493:SF22	KOG1595			GO:0005515	AT5G12850.1
Gorai.001G138400	15	0	5	1	0	3	Pentatricopeptide repeat (PPR) superfamily protein	PF01535	PTHR24015					AT4G13650.1
Gorai.001G138500	6	6	1	1	18	18	Zinc-binding ribosomal protein family protein	PF01907	PTHR10768	KOG3475			GO:0003735,GO:0006412,GO:0005622,GO:0005840	AT3G16080.1
Gorai.001G138600	42	6	5	4	4	7	Pentatricopeptide repeat (PPR) superfamily protein	PF01535	PTHR24015,PTHR24015:SF163					AT2G17140.1
Gorai.001G138800	1	1	14	25	20	77	myb domain protein 83	PF00249	PTHR10641	KOG0048		K09422	GO:0003677	AT3G08500.1
Gorai.001G138900	4	3	11	17	28	85	Protein of unknown function (DUF1278)							AT2G27315.1
Gorai.001G139000	3	4	1	4	16	8	Protein of unknown function (DUF1278)							AT2G27315.1
Gorai.001G139100	2	6	1	0	1	1	RNA-binding (RRM/RBD/RNP motifs) family protein	PF00076	PTHR24012:SF67,PTHR24012	KOG0148			GO:0003676	AT5G19350.1
Gorai.001G139200	1	49	7	5	63	30	Protein of unknown function (DUF399 and DUF3411)	PF11891,PF04187						AT2G40400.1
Gorai.001G139300	15	4	10	2	16	24	Tetratricopeptide repeat (TPR)-like superfamily protein	PF01535	PTHR24015					AT1G08070.1
Gorai.001G139400	6	1	0	54	18	70
Gorai.001G139600	15	2	52	27	0	3	ADP/ATP carrier 2	PF00153	PTHR24089:SF35,PTHR24089	KOG0749				AT5G13490.1
Gorai.001G139700	1	4	3	0	5	2	sequence-specific DNA binding transcription factors			KOG4282				AT1G21200.1
Gorai.001G139900	6	26	15	36	112	35	CRINKLY4 related 2							AT2G39180.1
Gorai.001G140000	35	26	11	34	61	0	Integrase-type DNA-binding superfamily protein	PF00847	PTHR11795:SF332,PTHR11795			K09285	GO:0003700,GO:0006355	AT1G51190.1
Gorai.001G140200	7	3	1	35	28	13	AGC (cAMP-dependent, cGMP-dependent and protein kinase C) kinase family protein	PF00069	PTHR24356,PTHR24356:SF89	KOG0610			GO:0004672,GO:0005524,GO:0006468	AT3G20830.1
Gorai.001G140300	13	2	0	53	50	1	Putative glycosyl hydrolase of unknown function (DUF1680)	PF07944				K09955		AT5G12950.1
Gorai.001G140400	2	9	4	9	1	2								AT4G12070.1
Gorai.001G140500	17	2	1	2	72	3	Plant invertase/pectin methylesterase inhibitor superfamily	PF01095,PF04043	PTHR22931,PTHR22931:SF5				GO:0030599,GO:0042545,GO:0005618,GO:0004857	AT4G02320.1
Gorai.001G140600	1	1	2	7	24	52
Gorai.001G140700	6	6	8	8	74	74
Gorai.001G140900	none	0	none	22	none	0	Pollen Ole e 1 allergen and extensin family protein	PF01190						AT2G47540.1
Gorai.001G141000	1	0	1	22	2	36	root hair specific 13	PF01190						AT4G02270.1
Gorai.001G141100	0	7	5	43	43	11	RNA helicase family protein	PF00271,PF07717,PF00270,PF04408	PTHR18934,PTHR18934:SF75	KOG0926			GO:0003676,GO:0005524,GO:0008026,GO:0004386	AT1G33390.1
Gorai.001G141200	6	6	10	10	18	18	SNF1-related protein kinase 2.5	PF00069	PTHR24343,PTHR24343:SF58				GO:0004672,GO:0005524,GO:0006468	AT5G63650.1
Gorai.001G141300	14	14	5	5	56	56	fumarase 1	PF10415,PF00206	PTHR11444,PTHR11444:SF1	KOG1317	4.2.1.2	K01679	GO:0016829,GO:0006099	AT2G47510.1
Gorai.001G141400	1	16	4	4	17	2	P-loop nucleoside triphosphate hydrolases superfamily protein with CH (Calponin Homology) domain	PF00225,PF00307	PTHR24115:SF135,PTHR24115	KOG0239			GO:0003777,GO:0005524,GO:0007018,GO:0005515	AT2G47500.1
Gorai.001G141500	4	1	6	5	5	0	NAD+ transporter 1	PF00153	PTHR24089:SF38,PTHR24089	KOG0764				AT2G47490.1
Gorai.001G141600	22	none	33	none	0	none	Plant invertase/pectin methylesterase inhibitor superfamily protein	PF04043					GO:0004857,GO:0030599	AT5G46940.1
Gorai.001G141700	1	none	14	none	20	none	Plant invertase/pectin methylesterase inhibitor superfamily protein	PF04043					GO:0004857,GO:0030599	AT5G46940.1
Gorai.001G142100	0	4	4	8	0	34	galacturonosyltransferase-like 7	PF01501	PTHR13778				GO:0016757	AT3G62660.1
Gorai.001G142200	39	3	36	10	1	4	P-loop containing nucleoside triphosphate hydrolases superfamily protein							AT4G13030.1
Gorai.001G142300	2	2	10	1	26	3	importin alpha isoform 1	PF00514,PF01749	PTHR23316	KOG0166			GO:0005515,GO:0008565,GO:0006606,GO:0005634,GO:0005737,GO:0006886,GO:0005643	AT3G06720.1
Gorai.001G142500	54	0	11	45	0	0	zinc finger protein 6							AT1G67030.1
Gorai.001G142600	1	6	15	15	0	18	citrate synthase 2	PF00285	PTHR11739				GO:0046912,GO:0044262	AT3G58750.1
Gorai.001G142700	2	2	24	24	1	1			PTHR22774,PTHR22774:SF4					AT3G20720.1
Gorai.001G142800	31	2	1	2	1	1	Haloacid dehalogenase-like hydrolase (HAD) superfamily protein	PF00702	PTHR12725:SF15,PTHR12725	KOG3109			GO:0003824,GO:0008152	AT2G32150.1
Gorai.001G142900	1	61	14	45	20	0								AT4G02160.1
Gorai.001G143000	9	9	19	9	2	78								AT5G38700.1
Gorai.001G143100	2	20	4	1	1	86	thioredoxin family protein	PF07749,PF00085	PTHR18929	KOG0191			GO:0045454,GO:0005783	AT2G47470.1
Gorai.001G143200	3	3	1	1	1	4	myb domain protein 12	PF00249,PF06640	PTHR10641	KOG0048		K09422	GO:0003677	AT2G47460.1
Gorai.001G143300	1	8	3	20	2	4	Heat shock protein DnaJ with tetratricopeptide repeat		PTHR22904:SF7,PTHR22904					AT4G02100.1
Gorai.001G143400	38	2	27	34	0	0
Gorai.001G143600	16	1	4	14	8	20	beta-xylosidase 2	PF00933,PF01915			3.2.1.21	K05349	GO:0004553,GO:0005975	AT1G02640.1
Gorai.001G143700	1	1	0	17	2	45								AT4G02090.1
Gorai.001G143800	34	3	6	9	31	31								AT3G03280.1
Gorai.001G143900	10	7	2	8	146	63	MUTS homolog 6	PF00488,PF01624,PF05192,PF05188,PF05190	PTHR11361:SF31,PTHR11361	KOG0217		K08737	GO:0005524,GO:0030983,GO:0006298	AT4G02070.1
Gorai.001G144000	3	3	15	1	102	33	Ribosomal RNA adenine dimethylase family protein	PF00398	PTHR11727	KOG0820	2.1.1.183	K14191	GO:0000179,GO:0008649,GO:0000154,GO:0008168,GO:0008152	AT2G47420.1
Gorai.001G144100	7	7	0	6	11	11	WD40/YVTN repeat-like-containing domain;Bromodomain	PF00400	PTHR16266:SF18,PTHR16266	KOG0296			GO:0005515	AT2G47410.1
Gorai.001G144200	4	1	19	3	2	84	basic region/leucine zipper motif 53	PF00170	PTHR22952:SF61,PTHR22952				GO:0003700,GO:0043565,GO:0046983,GO:0006355	AT3G62420.1
Gorai.001G144300	4	4	9	6	25	5	CP12 domain-containing protein 2	PF02672						AT3G62410.1
Gorai.001G144400	13	5	17	17	10	7	Cytochrome c oxidase subunit Vc family protein	PF05799					GO:0055114,GO:0005746,GO:0004129	AT5G61310.1
Gorai.001G144500	0	0	2	9	24	24	nuclear encoded CLP protease 5	PF00574	PTHR10381	KOG0840	3.4.21.92	K01358	GO:0004252,GO:0006508	AT1G02560.1
Gorai.001G144600	4	1	2	7	13	16	HIT zinc finger ;PAPA-1-like conserved region	PF04795,PF04438	PTHR21561:SF9,PTHR21561					AT2G47350.1
Gorai.001G144700	2	13	21	2	3	43	Protein kinase superfamily protein	PF00069	PTHR24420,PTHR24420:SF742	KOG1187			GO:0004672,GO:0005524,GO:0006468	AT4G02010.1
Gorai.001G144800	5	4	1	19	1	2	heme binding	PF09459					GO:0020037,GO:0055114	AT3G62370.1
Gorai.001G144900	2	10	21	6	40	11	RNA binding;abscisic acid binding	PF00076	PTHR24011,PTHR24011:SF260	KOG0131			GO:0003676	AT4G16280.4
Gorai.001G145000	10	2	0	7	26	3	Zinc knuckle (CCHC-type) family protein							AT3G62330.1
Gorai.001G145100	5	27	5	5	3	3	Polynucleotidyl transferase, ribonuclease H-like superfamily protein	PF01612	PTHR13620				GO:0003676,GO:0008408,GO:0006139,GO:0005622	AT2G36110.1
Gorai.001G145200	2	4	5	29	3	38	AMP-dependent synthetase and ligase family protein	PF00501	PTHR24096	KOG1256	6.2.1.3	K01897	GO:0003824,GO:0008152	AT2G47240.1
Gorai.001G145300	none	1	none	14	none	20
Gorai.001G145400	5	1	1	4	1	143
Gorai.001G145500	6	69	38	14	91	2		PF03108
Gorai.001G145600	29	8	20	40	24	1		PF07281						AT4G01935.1
Gorai.001G145700	22	19	5	54	4	6	gibberellin 2-oxidase 6	PF03171	PTHR10209,PTHR10209:SF55	KOG0143			GO:0016491,GO:0016706,GO:0055114	AT1G02400.1
Gorai.001G145800	28	3	34	6	105	0	galactinol synthase 1	PF01501	PTHR11183,PTHR11183:SF2	KOG1950			GO:0016757	AT2G47180.1
Gorai.001G146000	none	16	none	1	none	17	pumilio 8	PF00806	PTHR12537,PTHR12537:SF13	KOG2049			GO:0003723	AT1G22240.1
Gorai.001G146100	11	11	4	4	10	10	ADP-ribosylation factor A1E	PF00025	PTHR11711	KOG0070		K07977	GO:0005525,GO:0007264,GO:0004871,GO:0019001,GO:0007186,GO:0005634,GO:0005737,GO:0005622	AT3G62290.1
Gorai.001G146200	1	4	3	18	2	37	Protein phosphatase 2C family protein	PF00481	PTHR13832,PTHR13832:SF147	KOG0698			GO:0003824	AT3G62260.1
Gorai.001G146300	9	11	25	2	77	1	Polyketide cyclase/dehydrase and lipid transport superfamily protein	PF03364						AT1G02475.1
Gorai.001G146400	4	13	1	34	122	69	NAD(P)-binding Rossmann-fold superfamily protein	PF00106	PTHR24322	KOG0725			GO:0016491,GO:0008152	AT2G47140.1
Gorai.001G146500	0	3	2	2	0	94	ubiquitin 6	PF00240,PF01599	PTHR10666	KOG0004		K02977	GO:0005515,GO:0003735,GO:0006412,GO:0005622,GO:0005840	AT2G47110.1
Gorai.001G146600	10	2	18	7	92	64	methyltransferases	PF05206,PF05253,PF11722	PTHR12998	KOG2811			GO:0008168,GO:0008033	AT4G01880.1
Gorai.001G146700	3	4	1	9	4	31	tolB protein-related	PF00930,PF07676	PTHR11731:SF44,PTHR11731				GO:0006508,GO:0016020	AT4G01870.1
Gorai.001G146800	15	49	2	0	38	7	S-adenosylmethionine synthetase 2	PF02772,PF02773,PF00438	PTHR11964	KOG1506	2.5.1.6	K00789	GO:0004478,GO:0006556,GO:0005524	AT4G01850.1
Gorai.001G146900	30	52	28	38	6	91	hAT dimerisation domain-containing protein / transposase-related	PF05699	PTHR10775:SF75,PTHR10775				GO:0046983	AT5G33406.1
Gorai.001G147000	4	9	11	44	4	0	hAT transposon superfamily protein	PF02892					GO:0003677	AT5G31412.1
Gorai.001G147100	0	none	54	none	0	none	pleiotropic drug resistance 5	PF01061,PF08370,PF00005	PTHR19241,PTHR19241:SF10	KOG0065			GO:0005524,GO:0016887,GO:0016020	AT2G37280.1
Gorai.001G147400	1	1	4	2	8	6	Protein kinase superfamily protein	PF00069	PTHR24420:SF870,PTHR24420	KOG1187			GO:0004672,GO:0005524,GO:0006468	AT2G47060.4
Gorai.001G147500	1	1	19	2	36	6	Chaperone DnaJ-domain superfamily protein							AT3G62190.1
Gorai.001G147600	2	13	1	1	26	43
Gorai.001G147700	0	10	21	2	74	26	Chaperone DnaJ-domain superfamily protein	PF00226	PTHR25040:SF109,PTHR25040				GO:0031072	AT3G62190.1
Gorai.001G147800	28	0	54	1	0	0
Gorai.001G147900	1	1	3	3	2	2	WRKY family transcription factor	PF03106					GO:0003700,GO:0043565,GO:0006355	AT4G01720.1
Gorai.001G148000	1	16	6	4	5	17	Low temperature and salt responsive protein family	PF01679		KOG1773			GO:0016021	AT3G05890.1
Gorai.001G148200	3	3	1	10	4	4								AT2G46980.2
Gorai.001G148300	11	16	4	4	17	17	phytochrome interacting factor 3	PF00010	PTHR12565	KOG4304			GO:0030528,GO:0006355	AT1G09530.1
Gorai.001G148400	0	7	2	25	24	4	Pentatricopeptide repeat (PPR) superfamily protein	PF01535	PTHR24015					AT1G11290.1
Gorai.001G148500	1	1	3	3	2	2	myb domain protein 61	PF00249	PTHR10641,PTHR10641:SF30	KOG0048		K09422	GO:0003677	AT1G09540.1
Gorai.001G148600	1	1	6	6	5	5								AT2G46940.1
Gorai.001G148700	1	4	3	3	2	2	Haloacid dehalogenase-like hydrolase (HAD) superfamily protein	PF00702	PTHR18901	KOG3109			GO:0003824,GO:0008152	AT3G62040.1
Gorai.001G148800	1	4	2	29	13	5	Polyketide cyclase / dehydrase and lipid transport protein	PF03364						AT4G01650.1
Gorai.001G148900	9	43	22	45	6	0	expansin A17	PF01357,PF03330						AT4G01630.1
Gorai.001G149000	none	52	none	28	none	1								AT5G03050.1
Gorai.001G149100	7	1	20	3	0	5	receptor-like protein kinase 2	PF00069,PF00560,PF08263	PTHR24420,PTHR24420:SF99	KOG1187			GO:0004672,GO:0005524,GO:0006468,GO:0005515	AT3G02130.1
Gorai.001G149300	5	2	32	11	1	0	ADPGLC-PPase large subunit	PF00483	PTHR22572,PTHR22572:SF10	KOG1322			GO:0016779,GO:0009058	AT1G27680.1
Gorai.001G149400	4	13	6	30	115	43			PTHR13052					AT1G02290.1
Gorai.001G149500	1	6	15	45	17	41	serine protease inhibitor, Kazal-type family protein							AT4G01575.1
Gorai.001G149600	14	14	2	1	7	107	Tetratricopeptide repeat (TPR)-like superfamily protein	PF01535	PTHR24015					AT4G01570.1
Gorai.001G149700	6	6	36	10	114	18	Domain of unknown function (DUF298)	PF03556						AT1G15860.1
Gorai.001G149800	18	18	2	5	1	3	Ribosomal RNA processing Brix domain protein	PF04427	PTHR22734	KOG2780				AT4G01560.1
Gorai.001G149900	9	7	19	3	6	12	Calcium-binding endonuclease/exonuclease/phosphatase family	PF03372	PTHR12121,PTHR12121:SF15	KOG2338				AT1G02270.1
Gorai.001G150000	4	10	3	3	9	73	NAC transcription factor-like 9	PF02365					GO:0003677,GO:0006355	AT4G35580.1
Gorai.001G150100	13	1	33	8	3	30
Gorai.001G150200	0	8	9	13	2	3	AP2/B3-like transcriptional factor family protein	PF02362					GO:0003677,GO:0006355	AT2G46870.1
Gorai.001G150300	8	0	24	15	0	1
Gorai.001G150400	7	10	0	13	11	76	dicer-like 1	PF03368,PF00271,PF00636,PF02170,PF00035,PF00270	PTHR14950,PTHR14950:SF14	KOG0701	3.1.26.-	K11592	GO:0003725,GO:0005622,GO:0003676,GO:0005524,GO:0008026,GO:0004386,GO:0003723,GO:0004525,GO:0006396,GO:0005515,GO:0016891,GO:0003677,GO:0016787	AT1G01040.1
Gorai.001G150500	4	11	2	0	6	58	pyrophosphorylase 1	PF00719	PTHR10286	KOG1626	3.6.1.1	K01507	GO:0000287,GO:0004427,GO:0006796,GO:0005737	AT1G01050.1
Gorai.001G150600	2	6	35	2	1	1	60S acidic ribosomal protein family	PF00428	PTHR21141	KOG1762		K02942	GO:0003735,GO:0006414,GO:0005622,GO:0005840	AT5G24510.1
Gorai.001G150700	2	2	1	5	1	3	RNA-binding (RRM/RBD/RNP motifs) family protein	PF00076	PTHR24011,PTHR24011:SF218	KOG0149			GO:0003676	AT2G46780.1
Gorai.001G150800	1	1	4	14	2	20	NAC (No Apical Meristem) domain transcriptional regulator superfamily protein	PF02365					GO:0003677,GO:0006355	AT2G46770.1
Gorai.001G150900	32	32	9	9	25	25	3-ketoacyl-CoA synthase 1	PF08392,PF08541					GO:0016746,GO:0009058,GO:0016747,GO:0006633,GO:0016020,GO:0008610	AT1G01120.1
Gorai.001G151000	3	3	1	0	16	12	CBL-interacting protein kinase 9	PF03822,PF00069	PTHR24345,PTHR24345:SF45	KOG0583			GO:0004672,GO:0005524,GO:0006468,GO:0007165	AT1G01140.1
Gorai.001G151100	67	67	1	1	162	162
Gorai.001G151300	0	13	1	2	6	10	DHHC-type zinc finger family protein	PF01529	PTHR22883	KOG1315			GO:0008270	AT4G00840.1
Gorai.001G151400	none	1	none	14	none	20	S-adenosyl-L-methionine-dependent methyltransferases superfamily protein	PF04989					GO:0008168,GO:0008610	AT1G01180.1
Gorai.001G151500	2	11	51	36	0	114	small ubiquitin-like modifier 1	PF11976		KOG1769				AT4G26840.1
Gorai.001G151600	6	6	1	1	18	18	UDP-3-O-acyl N-acetylglycosamine deacetylase family protein	PF03331					GO:0008759,GO:0009245	AT1G24880.1
Gorai.001G151700	60	none	12	none	1	none	Basic helix-loop-helix (bHLH) DNA-binding family protein	PF00010	PTHR11514,PTHR11514:SF7				GO:0030528,GO:0006355	AT1G32640.1
Gorai.001G151900	2	2	1	1	1	1	Transducin/WD40 repeat-like superfamily protein		PTHR22850:SF17,PTHR22850					AT5G63010.1
Gorai.001G152000	2	0	1	1	39	39	CDPK-related kinase 3	PF00069	PTHR24349,PTHR24349:SF13	KOG0032			GO:0004672,GO:0005524,GO:0006468,GO:0016773,GO:0009103,GO:0016020	AT2G46700.1
Gorai.001G152100	5	6	1	1	4	18		PF01704					GO:0016779,GO:0008152
Gorai.001G152200	19	none	17	none	0	none	homeobox 7	PF02183,PF00046	PTHR24326:SF134,PTHR24326	KOG0483			GO:0003700,GO:0043565,GO:0006355,GO:0003677,GO:0005634	AT2G46680.1
Gorai.001G152300	2	11	17	4	1	1	cytochrome B5 isoform E	PF00173	PTHR19359	KOG0537			GO:0020037	AT5G53560.1
Gorai.001G152400	21	9	34	22	83	6								AT2G46630.1
Gorai.001G152500	1	1	0	6	5	5	P-loop containing nucleoside triphosphate hydrolases superfamily protein	PF00004	PTHR23070,PTHR23070:SF1	KOG0743			GO:0005524	AT2G46620.1
Gorai.001G152600	32	1	5	6	16	5	RAB GTPase homolog A3	PF00071	PTHR24073,PTHR24073:SF213	KOG0087			GO:0003924,GO:0005525,GO:0007264,GO:0005622	AT1G01200.1
Gorai.001G152700	4	4	2	8	13	71	Pentatricopeptide repeat (PPR-like) superfamily protein	PF01535	PTHR24015					AT5G16420.1
Gorai.001G152800	4	7	6	6	0	9	ARM repeat superfamily protein	PF04564,PF05804	PTHR23315:SF36,PTHR23315	KOG4224			GO:0004842,GO:0016567,GO:0000151	AT1G76390.1
Gorai.001G152900	4	1	23	6	13	5	ER-type Ca2+-ATPase 2	PF00689,PF00702,PF00690,PF00122	PTHR24093:SF91,PTHR24093	KOG0202	3.6.3.8	K01537	GO:0000166,GO:0046872,GO:0003824,GO:0008152,GO:0016020,GO:0015662,GO:0006812,GO:0006754	AT4G00900.1
Gorai.001G153000	38	3	14	10	0	4	NC domain-containing protein-related	PF04970	PTHR13943:SF16,PTHR13943					AT1G01225.1
Gorai.001G153100	52	none	38	none	91	none	Aluminium activated malate transporter family protein	PF11744					GO:0006810,GO:0005886,GO:0010044	AT4G00910.1
Gorai.001G153200	12	1	4	19	8	2	ORMDL family protein	PF04061	PTHR12665,PTHR12665:SF2	KOG3319			GO:0016021	AT1G01230.1
Gorai.001G153300	4	4	9	0	2	16	Dof-type zinc finger DNA-binding family protein	PF02701					GO:0003677,GO:0008270,GO:0006355	AT3G61850.4
Gorai.001G153400	1	7	7	19	52	13	Transducin/WD40 repeat-like superfamily protein	PF00400	PTHR14221	KOG0283			GO:0005515	AT5G53500.1
Gorai.001G153500	5	1	2	2	7	24	Pyridoxamine 5\'-phosphate oxidase family protein	PF01243	PTHR10851	KOG4558			GO:0004733,GO:0010181,GO:0055114,GO:0008615	AT2G46580.1
Gorai.001G153600	15	30	13	1	62	3	Tetratricopeptide repeat (TPR)-like superfamily protein	PF00515	PTHR19959	KOG1840			GO:0005515	AT4G10840.1
Gorai.001G153700	1	1	19	3	2	2								AT2G46550.1
Gorai.001G153800	7	7	7	6	37	82		PF05097						AT5G53030.2
Gorai.001G153900	9	9	8	0	71	27	auxin response factor 11	PF02309,PF06507,PF02362					GO:0006355,GO:0005634,GO:0003677,GO:0009725	AT2G46530.1
Gorai.001G154000	5	5	5	1	1	1	cellular apoptosis susceptibility protein, putative / importin-alpha re-exporter, putative	PF08506,PF08389,PF03378,PF03810	PTHR10997:SF8,PTHR10997	KOG1992			GO:0005515,GO:0008565,GO:0006886,GO:0008283,GO:0008262,GO:0005737,GO:0005634	AT2G46520.1
Gorai.001G154100	none	9	none	9	none	54	RmlC-like cupins superfamily protein	PF00190					GO:0045735	AT5G39110.1
Gorai.001G154200	none	0	none	28	none	4	RmlC-like cupins superfamily protein	PF00190					GO:0045735	AT3G05950.1
Gorai.001G154300	6	6	38	38	91	91	DEA(D/H)-box RNA helicase family protein		PTHR24031,PTHR24031:SF125					AT1G31970.1
Gorai.001G154400	3	7	1	12	21	13	Eukaryotic aspartyl protease family protein	PF00026	PTHR13683,PTHR13683:SF98	KOG1339			GO:0004190,GO:0006508	AT1G01300.1
Gorai.001G154500	14	2	7	9	39	0	phosphoinositide 4-kinase gamma 4	PF00240,PF00454	PTHR15245,PTHR15245:SF11	KOG2381			GO:0005515,GO:0016773	AT2G46500.1
Gorai.001G154600	none	8	none	26	none	88
Gorai.001G154700	15	2	2	1	15	1	Acid phosphatase/vanadium-dependent haloperoxidase-related protein	PF02681						AT3G61770.1
Gorai.001G154800	2	2	1	11	81	1	DYNAMIN-like 1B	PF01031,PF00350,PF02212	PTHR11566:SF12,PTHR11566	KOG0446			GO:0003924,GO:0005525	AT3G61760.1
Gorai.001G154900	8	26	1	20	28	4	O-acyltransferase (WSD1-like) family protein	PF03007,PF06974					GO:0004144	AT5G53390.1
Gorai.001G155000	7	3	4	1	16	28	O-acyltransferase (WSD1-like) family protein	PF03007,PF06974					GO:0004144	AT5G53390.1
Gorai.001G155200	2	none	1	none	1	none	lipid transfer protein 4							AT5G59310.1
Gorai.001G155300	1	1	13	11	46	151	cyclic nucleotide gated channel 1	PF00520,PF00027	PTHR10217:SF7,PTHR10217	KOG0498		K05391	GO:0005216,GO:0006811,GO:0055085,GO:0016020	AT5G53130.1
Gorai.001G155400	7	8	0	16	15	11	nucleotidyltransferases		PTHR23092:SF15,PTHR23092	KOG1906				AT3G61690.1
Gorai.001G155500	4	4	2	1	16	16	pentatricopeptide (PPR) repeat-containing protein	PF11955,PF01535	PTHR24015,PTHR24015:SF4					AT4G01030.1
Gorai.001G155600	2	5	2	2	4	1	Histone superfamily protein	PF00125	PTHR11426,PTHR11426:SF4	KOG1745		K11253	GO:0003677,GO:0006334,GO:0000786	AT1G01370.1
Gorai.001G155700	56	1	14	12	2	4	Homeodomain-like superfamily protein	PF00249	PTHR10641			K09422	GO:0003677	AT5G53200.1
Gorai.001G155800	34	34	9	9	31	31	WRKY DNA-binding protein 46	PF03106					GO:0003700,GO:0043565,GO:0006355	AT2G46400.1
Gorai.001G155900	19	6	12	12	4	18	dihydroflavonol 4-reductase	PF01370	PTHR10366,PTHR10366:SF79	KOG1502			GO:0016491,GO:0008152,GO:0003854,GO:0016616,GO:0006694,GO:0055114,GO:0003824,GO:0050662,GO:0044237	AT5G42800.1
Gorai.001G156000	none	53	none	14	none	0	UDP-Glycosyltransferase superfamily protein	PF00201	PTHR11926,PTHR11926:SF15	KOG1192	2.4.1.218	K08237	GO:0016758,GO:0008152	AT4G01070.1
Gorai.001G156200	6	1	1	10	18	46
Gorai.001G156300	5	2	5	6	3	0	Protein of unknown function (DUF3133)	PF11331						AT2G46380.1
Gorai.001G156400	12	2	11	1	19	1								AT3G61660.1
Gorai.001G156500	6	2	1	15	18	0	mevalonate diphosphate decarboxylase 1		PTHR10977:SF2,PTHR10977				GO:0008299,GO:0004163	AT2G38700.1
Gorai.001G156600	4	4	3	3	2	2	Auxin-responsive GH3 family protein	PF03321				K14506		AT2G46370.4
Gorai.001G156700	9	1	13	39	46	70	arabinogalactan protein 20	PF06376						AT3G61640.1
Gorai.001G156800	1	9	3	8	2	63	plastid division2							AT2G16070.2
Gorai.001G156900	72	16	4	1	17	17	cytokinin response factor 6	PF00847					GO:0003700,GO:0006355	AT3G61630.1
Gorai.001G157000	12	48	1	0	21	16								AT4G01150.1
Gorai.001G157100	none	66	none	30	none	0	eukaryotic translation initiation factor 3G1	PF00076	PTHR10352				GO:0003676	AT3G11400.2
Gorai.001G157300	4	1	3	3	2	2	Heavy metal transport/detoxification superfamily protein	PF00403	PTHR22814,PTHR22814:SF56	KOG1603			GO:0046872,GO:0030001	AT1G01490.1
Gorai.001G157400	1	1	14	3	6	20	Late embryogenesis abundant protein	PF03168						AT1G01470.1
Gorai.001G157500	2	5	10	10	1	1	RING/U-box superfamily protein	PF00097	PTHR14155:SF24,PTHR14155					AT3G61550.1
Gorai.001G157600	25	6	10	12	0	41	5\'-3\' exonuclease family protein	PF00752	PTHR11081,PTHR11081:SF9				GO:0004518,GO:0006281	AT5G26680.1
Gorai.001G157700	6	76	38	38	91	0
Gorai.001G157900	2	5	4	2	0	1	Reticulon family protein	PF02453	PTHR10994	KOG1792			GO:0005783	AT2G46170.1
Gorai.001G158000	13	9	7	7	64	6								AT2G46200.1
Gorai.001G158100	2	3	2	4	1	0	Fatty acid/sphingolipid desaturase	PF00173,PF00487	PTHR19353	KOG4232			GO:0020037,GO:0006629,GO:0055114,GO:0016491	AT2G46210.1
Gorai.001G158200	11	16	11	4	0	17	ABI-1-like 1		PTHR10460					AT2G46225.1
Gorai.001G158300	3	3	16	0	71	51	Ribosomal L5P family protein	PF00673,PF00281	PTHR11994:SF4,PTHR11994	KOG0398		K02931	GO:0003735,GO:0006412,GO:0005622,GO:0005840	AT4G01310.1
Gorai.001G158400	2	2	1	1	3	1	Nuclear transport factor 2 (NTF2) family protein	PF10184						AT2G46100.1
Gorai.001G158500	2	2	2	7	1	39	Protein kinase superfamily protein	PF00069	PTHR24420,PTHR24420:SF688	KOG1187			GO:0004672,GO:0005524,GO:0006468	AT4G01330.1
Gorai.001G158600	6	0	0	11	7	0	Pentatricopeptide repeat (PPR) superfamily protein	PF01535	PTHR24015,PTHR24015:SF163					AT2G17140.1
Gorai.001G158700	6	6	14	14	0	0	Homeodomain-like superfamily protein							AT1G49560.1
Gorai.001G158800	2	2	2	1	1	1	MAP kinase 4	PF00069	PTHR24055,PTHR24055:SF69	KOG0660	2.7.11.24	K04371	GO:0004672,GO:0005524,GO:0006468	AT4G01370.1
Gorai.001G158900	7	16	0	4	60	14	Pectin lyase-like superfamily protein	PF00295					GO:0004650,GO:0005975	AT3G61490.1
Gorai.001G159000	5	2	2	1	1	1	MAP kinase 4	PF00069	PTHR24055,PTHR24055:SF69	KOG0660			GO:0004672,GO:0005524,GO:0006468,GO:0016773,GO:0009103,GO:0016020	AT4G01370.1
Gorai.001G159100	62	17	13	13	7	62	Ribosomal protein S24/S35, mitochondrial							AT3G18240.1
Gorai.001G159200	1	1	21	21	93	93	Quinoprotein amine dehydrogenase, beta chain-like; RIC1-like guanyl-nucleotide exchange factor	PF07064	PTHR22746:SF4,PTHR22746	KOG2006				AT5G28350.1
Gorai.001G159300	2	0	10	18	3	126	brassinosteroid-responsive RING-H2	PF00097	PTHR22764:SF27,PTHR22764	KOG1493				AT3G61460.1
Gorai.001G159400	6	5	5	1	1	1								AT5G05800.1
Gorai.001G159800	13	29	7	4	64	0	RING-H2 finger B1A	PF00097	PTHR22766,PTHR22766:SF20					AT4G00335.1
Gorai.001G159900	23	23	16	16	126	126								AT2G07820.1
Gorai.001G160000	23	23	16	13	29	29
Gorai.001G160100	0	0	13	13	13	70	photosystem II reaction center protein D	PF00124					GO:0045156,GO:0009772,GO:0019684,GO:0030077	ATCG00270.1
Gorai.001G160200	23	25	16	16	29	29	cytochrome C biogenesis 382	PF01578					GO:0006461,GO:0008535,GO:0016020	ATMG00830.1
Gorai.001G160300	1	1	6	3	5	5
Gorai.001G160400	25	25	16	16	29	29
Gorai.001G160500	25	23	16	13	29	29	ATPase, F0 complex, subunit A protein	PF00119	PTHR11410	KOG4665	3.6.3.14	K02126	GO:0015078,GO:0015986,GO:0045263	AT2G07741.1
Gorai.001G160600	12	12	16	17	64	49
Gorai.001G160700	23	23	16	16	29	29	NADH dehydrogenase subunit 4L	PF00420	PTHR11434	KOG4669	1.6.5.3	K03882	GO:0016651,GO:0042773,GO:0055114	ATMG00650.1
Gorai.001G160800	1	1	16	16	30	30
Gorai.001G160900	0	0	16	16	126	126
Gorai.001G161000	1	1	16	16	126	126
Gorai.001G161100	23	23	16	16	29	29
Gorai.001G161200	23	23	16	16	126	126
Gorai.001G161300	23	23	16	16	29	29
Gorai.001G161400	23	23	16	16	29	29
Gorai.001G161500	23	23	16	16	29	29	structural constituent of ribosome;protein binding	PF00189,PF00252	PTHR12220:SF17,PTHR12220	KOG3422			GO:0003735,GO:0006412,GO:0005622,GO:0005840,GO:0019843	ATMG00090.1
Gorai.001G161600	59	23	16	16	32	29
Gorai.001G161700	23	none	16	none	29	none	cytochrome oxidase 2	PF02790,PF00116	PTHR22888	KOG4767	1.9.3.1	K02261	GO:0004129,GO:0005507,GO:0016020,GO:0009055,GO:0022900,GO:0016021	ATMG00160.1
Gorai.001G161800	23	23	41	16	29	29	Alpha-L RNA-binding motif/Ribosomal protein S4 family protein	PF01479					GO:0003723	AT2G07734.1
Gorai.001G161900	23	23	16	16	29	29	mitochondrial ribosomal protein S14	PF00253	PTHR19836,PTHR19836:SF11	KOG1741		K02954	GO:0003735,GO:0006412,GO:0005622,GO:0005840	AT2G34520.1
Gorai.001G162000	23	none	16	none	29	none	Di-haem cytochrome, transmembrane;Cytochrome b/b6, C-terminal	PF00033,PF00032	PTHR19271	KOG4663	1.10.2.2	K00412	GO:0009055,GO:0016491,GO:0016020,GO:0022904	AT2G07727.1
Gorai.001G162100	1	1	8	8	126	126
Gorai.001G162200	23	26	16	16	29	0		PF09668					GO:0004190,GO:0006508
Gorai.001G162300	23	23	16	16	126	126	cytochrome C biogenesis 452		PTHR11439					ATMG00180.1
Gorai.001G162400	23	52	16	15	29	29	Cytochrome c oxidase, subunit III	PF00510	PTHR11403	KOG4664	1.9.3.1	K02262	GO:0015002,GO:0016020,GO:0006123,GO:0004129	AT2G07687.1
Gorai.001G162500	23	23	16	34	29	79	cytochrome oxidase	PF00115	PTHR10422	KOG4769	1.9.3.1	K02256	GO:0004129,GO:0005506,GO:0009055,GO:0020037,GO:0009060,GO:0055114,GO:0016021	ATMG01360.1
Gorai.001G162600	4	27	16	16	29	65
Gorai.001G162700	25	23	8	8	5	5	Mitovirus RNA-dependent RNA polymerase	PF05919						ATMG01110.1
Gorai.001G162800	23	23	16	16	29	29								AT2G07691.1
Gorai.001G162900	23	none	16	none	29	none	ATPase, F1 complex, alpha subunit protein	PF00006,PF00306	PTHR15184:SF19,PTHR15184				GO:0005524,GO:0016820,GO:0015991,GO:0033178	AT2G07698.1
Gorai.001G163000	25	23	16	16	29	29
Gorai.001G163100	23	23	16	16	29	29
Gorai.001G163200	23	23	16	16	29	29
Gorai.001G163300	1	1	16	16	126	126	starch branching enzyme 2.2							AT5G03650.1
Gorai.001G163400	23	23	9	16	9	29	NADH dehydrogenase 5B	PF00361,PF00137	PTHR22773,PTHR22773:SF51	KOG4668	1.6.5.3	K03883	GO:0015078,GO:0015991,GO:0033177,GO:0008137,GO:0042773,GO:0055114	ATMG00665.1
Gorai.001G163500	23	23	16	16	29	29
Gorai.001G163600	23	23	16	16	126	126
Gorai.001G163700	23	35	16	16	126	0	photosystem II reaction center protein E	PF00284,PF00283					GO:0046872,GO:0015979,GO:0009523,GO:0009536,GO:0009579,GO:0016021	ATCG00580.1
Gorai.001G163800	23	23	16	16	126	126
Gorai.001G163900	23	71	16	16	29	0
Gorai.001G164000	23	23	16	13	29	46
Gorai.001G164100	44	23	13	16	4	29	photosystem II reaction center protein C							ATCG00280.1
Gorai.001G164200	23	23	16	16	29	29	NADH dehydrogenase 1B	PF00146	PTHR11432		1.6.5.3	K03878	GO:0055114,GO:0016020	ATMG01120.1
Gorai.001G164300	23	23	16	16	29	29								AT2G07599.2
Gorai.001G164400	23	74	16	8	126	0
Gorai.001G164500	23	23	16	16	29	29	Plant mitochondrial ATPase, F0 complex, subunit 8 protein	PF06449,PF02326			3.6.3.14	K02109	GO:0015078,GO:0015986,GO:0000276,GO:0016820,GO:0005739,GO:0016021	AT2G07707.1
Gorai.001G164600	23	23	16	16	29	29	NADH-Ubiquinone/plastoquinone (complex I) protein	PF00361	PTHR22773:SF41,PTHR22773		1.6.5.3	K03879	GO:0008137,GO:0042773,GO:0055114	AT2G07689.1
Gorai.001G164700	23	23	16	16	29	29
Gorai.001G164800	23	23	16	16	126	126
Gorai.001G164900	1	23	13	16	24	29
Gorai.001G165000	1	1	16	16	126	126
Gorai.001G165100	50	50	26	26	19	19
Gorai.001G165200	1	76	16	16	126	5
Gorai.001G165300	23	23	16	16	29	29	Ribosomal protein S7p/S5e family protein	PF00177	PTHR11205,PTHR11205:SF13				GO:0006412,GO:0005840,GO:0005622,GO:0003735	AT2G07696.1
Gorai.001G165400	23	23	16	16	29	29
Gorai.001G165500	1	1	16	16	126	126
Gorai.001G165600	23	23	16	16	126	126
Gorai.001G165700	1	1	16	16	11	11								AT2G07815.1
Gorai.001G165800	1	1	16	16	126	126
Gorai.001G165900	23	23	13	16	13	29	Cytochrome C assembly protein	PF01578					GO:0006461,GO:0008535,GO:0016020	AT2G07771.2
Gorai.001G166000	23	23	16	16	29	29
Gorai.001G166100	17	23	13	16	3	29
Gorai.001G166200	23	23	16	16	126	126								ATMG01060.1
Gorai.001G166300	44	23	25	16	0	29	NADH dehydrogenase subunit 4	PF00361	PTHR22773:SF40,PTHR22773		1.6.5.3	K03881	GO:0008137,GO:0042773,GO:0055114	ATMG00580.1
Gorai.001G166400	23	23	16	16	29	29
Gorai.001G166500	23	23	16	16	29	29
Gorai.001G166600	23	23	16	9	29	8
Gorai.001G166700	39	23	36	16	0	29	Sec-independent periplasmic protein translocase	PF00329,PF00902	PTHR10884	KOG1713			GO:0008137,GO:0055114	ATMG00570.1
Gorai.001G166800	15	13	8	13	92	46
Gorai.001G166900	23	23	17	17	45	45								AT2G07713.1
Gorai.001G167000	23	0	8	8	29	2
Gorai.001G167200	23	none	16	none	126	none
Gorai.001G167300	23	23	16	16	29	29
Gorai.001G167400	23	23	16	38	29	0	hydrogen ion transporting ATP synthases, rotational mechanism;zinc ion binding	PF05405					GO:0015078,GO:0015986,GO:0000276	ATMG00640.1
Gorai.001G167500	1	1	31	31	20	20
Gorai.001G167600	23	23	16	16	29	29	succinate dehydrogenase 3-2	PF01127		KOG0449			GO:0016627	AT4G32210.1
Gorai.001G167700	23	23	16	16	29	29	NADH dehydrogenase 2B		PTHR22773:SF41,PTHR22773					ATMG01320.1
Gorai.001G167800	23	35	16	8	29	60	NADH dehydrogenase 5B	PF06455	PTHR22773,PTHR22773:SF51				GO:0008137,GO:0042773,GO:0055114	ATMG00665.1
Gorai.001G167900	1	none	0	none	0	none
Gorai.001G168000	23	23	3	16	29	29	NADH dehydrogenase 6	PF00499			1.6.5.3	K03884	GO:0008137,GO:0055114	ATMG00270.1
Gorai.001G168100	23	0	16	36	126	0
Gorai.001G168200	1	1	16	16	5	5
Gorai.001G168300	1	1	16	9	126	25
Gorai.001G168400	50	50	41	7	11	44	ARID/BRIGHT DNA-binding domain;ELM2 domain protein	PF01388					GO:0003677,GO:0005622	AT2G46040.1
Gorai.001G168500	5	11	10	1	1	59								AT2G46000.1
Gorai.001G168600	11	3	8	1	53	4
Gorai.001G168700	7	7	5	6	11	11	transcription regulatory protein SNF2, putative	PF00176,PF00439,PF00271,PF08880	PTHR10799,PTHR10799:SF92	KOG0386			GO:0003677,GO:0005524,GO:0003676,GO:0004386,GO:0005515,GO:0016818,GO:0006355,GO:0005634	AT2G46020.2
Gorai.001G168800	12	12	51	1	41	7								AT1G53450.1
Gorai.001G168900	4	2	3	5	9	3	Major facilitator superfamily protein	PF07690	PTHR11662:SF23,PTHR11662	KOG2532			GO:0022857,GO:0055085,GO:0016021	AT4G00370.1
Gorai.001G169100	8	0	2	8	1	92	SIGNAL PEPTIDE PEPTIDASE-LIKE 4	PF04258,PF02225	PTHR12174,PTHR12174:SF30	KOG2442			GO:0004190,GO:0016021	AT1G01650.1
Gorai.001G169200	4	4	3	9	2	31	U-box domain-containing protein kinase family protein	PF00069,PF04564,PF00582	PTHR24420,PTHR24420:SF448	KOG1187			GO:0004672,GO:0005524,GO:0006468,GO:0006950,GO:0004842,GO:0016567,GO:0000151	AT2G45910.1
Gorai.001G169300	2	13	1	3	1	89	U-box domain-containing protein kinase family protein	PF00069,PF04564	PTHR24420,PTHR24420:SF448	KOG1187			GO:0004672,GO:0005524,GO:0006468,GO:0004842,GO:0016567,GO:0000151	AT2G45910.1
Gorai.001G169400	6	6	3	3	68	68		PF02810						AT3G04950.1
Gorai.001G169500	3	0	24	1	88	112
Gorai.001G169600	5	5	17	17	1	1	Ribosomal protein L36e family protein	PF01158	PTHR10114	KOG3452		K02920	GO:0003735,GO:0006412,GO:0005622,GO:0005840	AT3G53740.2
Gorai.001G169700	13	11	15	7	1	3	myb domain protein 17	PF00249	PTHR10641	KOG0048			GO:0003677	AT3G61250.1
Gorai.001G169800	5	33	1	1	3	72	RNAhelicase-like 8	PF00271,PF00270	PTHR24031,PTHR24031:SF6	KOG0326			GO:0003676,GO:0005524,GO:0008026,GO:0004386	AT4G00660.1
Gorai.001G170000	2	6	1	18	26	68	BED zinc finger ;hAT family dimerisation domain	PF05699	PTHR10775:SF11,PTHR10775	KOG1121			GO:0046983	AT3G42170.1
Gorai.001G170100	2	2	2	7	26	65		PF07287						AT1G01770.1
Gorai.001G170300	1	19	6	51	5	95	NAD(P)-binding Rossmann-fold superfamily protein	PF00106	PTHR24322:SF19,PTHR24322	KOG1208			GO:0016491,GO:0008152	AT3G61220.1
Gorai.001G170400	6	7	22	28	3	0	NAD(P)-binding Rossmann-fold superfamily protein	PF00106	PTHR24322:SF19,PTHR24322	KOG1208			GO:0016491,GO:0008152,GO:0003824,GO:0050662,GO:0044237	AT1G01800.1
Gorai.001G170500	10	8	13	14	26	0	NAD(P)-binding Rossmann-fold superfamily protein	PF00106	PTHR24322:SF19,PTHR24322	KOG1208			GO:0016491,GO:0008152	AT3G61220.1
Gorai.001G170600	7	4	0	9	16	31	NAD(P)-binding Rossmann-fold superfamily protein	PF00106	PTHR24322:SF19,PTHR24322	KOG1208			GO:0016491,GO:0008152	AT1G01800.1
Gorai.001G170700	2	2	29	2	23	1	NAD-dependent malic enzyme 2	PF00390,PF03949	PTHR23406:SF2,PTHR23406	KOG1257	1.1.1.39	K00028	GO:0016616,GO:0055114,GO:0051287	AT4G00570.1
Gorai.001G170800	12	12	4	17	8	10								AT4G00585.1
Gorai.001G170900	9	9	11	6	47	27
Gorai.001G171000	2	2	5	1	3	1	Homeobox-leucine zipper family protein / lipid-binding START domain-containing protein	PF01852,PF00046	PTHR24325:SF193,PTHR24325	KOG0484		K09338	GO:0003700,GO:0043565,GO:0006355	AT4G00730.1
Gorai.001G171100	2	2	1	10	3	3
Gorai.001G171200	6	6	45	45	91	91	RHOMBOID-like protein 3	PF01694	PTHR22936	KOG2289			GO:0004252,GO:0016021,GO:0006508	AT5G07250.1
Gorai.001G171300	6	6	13	13	135	135
Gorai.001G171400	13	4	8	43	89	9	UBX domain-containing protein	PF00789	PTHR23322:SF3,PTHR23322	KOG1363			GO:0005515	AT4G00752.1
Gorai.001G171500	8	16	4	4	14	12	S-adenosyl-L-methionine-dependent methyltransferases superfamily protein	PF03141	PTHR10108,PTHR10108:SF54				GO:0008168	AT4G00750.1
Gorai.001G171600	5	6	12	11	101	49	Ribosomal protein L7Ae/L30e/S12e/Gadd45 family protein	PF01248	PTHR11449	KOG1510			GO:0006412,GO:0005840,GO:0005622,GO:0003735	AT1G77940.1
Gorai.001G171700	4	4	4	3	12	5	F-box family protein		PTHR22844:SF86,PTHR22844					AT4G00755.1
Gorai.001G171800	12	22	40	1	0	4
Gorai.001G171900	16	16	3	4	80	121	peroxin 11D	PF05648	PTHR12652,PTHR12652:SF16	KOG4186			GO:0016559,GO:0005778	AT2G45740.1
Gorai.001G172000	10	2	43	1	32	1	SET domain-containing protein		PTHR13271	KOG1337				AT1G01920.2
Gorai.001G172200	10	47	2	28	4	1	AGAMOUS-like 6	PF01486,PF00319	PTHR11945:SF19,PTHR11945	KOG0014			GO:0003677,GO:0046983,GO:0003700,GO:0006355,GO:0005634,GO:0043565	AT2G45650.1
Gorai.001G172300	none	6	none	12	none	41	plant intracellular ras group-related LRR 4							AT4G35470.1
Gorai.001G172400	4	36	6	0	9	0	RNA-binding CRS1 / YhbY (CRM) domain-containing protein	PF01985					GO:0003723	AT4G31010.1
Gorai.001G172500	6	6	36	36	0	0	ARM repeat superfamily protein							AT5G67340.1
Gorai.001G172600	4	0	6	1	9	24	shrunken seed protein (SSE1)	PF08610	PTHR13299	KOG4546		K13335		AT2G45690.1
Gorai.001G172700	5	5	5	2	1	7	P-loop containing nucleoside triphosphate hydrolases superfamily protein	PF02374	PTHR10803	KOG2825	3.6.3.16	K01551		AT1G01910.1
Gorai.001G172800	2	14	15	1	1	39	galacturonosyltransferase 1	PF01501	PTHR13778,PTHR13778:SF4				GO:0016757	AT3G61130.1
Gorai.001G172900	none	6	none	13	none	1	2-oxoglutarate (2OG) and Fe(II)-dependent oxygenase superfamily protein	PF03171	PTHR10209,PTHR10209:SF55	KOG0143			GO:0016491,GO:0016706,GO:0055114	AT4G25420.1
Gorai.001G173000	3	3	42	11	35	12	2-oxoglutarate (2OG) and Fe(II)-dependent oxygenase superfamily protein	PF03171	PTHR10209,PTHR10209:SF55	KOG0143			GO:0016491,GO:0016706,GO:0055114	AT4G25420.1
Gorai.001G173100	15	13	10	3	62	113	D-isomer specific 2-hydroxyacid dehydrogenase family protein	PF02826,PF00389	PTHR10996,PTHR10996:SF15	KOG0069			GO:0016616,GO:0051287,GO:0008152,GO:0055114,GO:0048037	AT2G45630.2
Gorai.001G173300	9	0	4	47	21	1	early nodulin-like protein 18	PF02298					GO:0005507,GO:0009055	AT1G08500.1
Gorai.001G173400	1	13	29	21	48	64	AAA-type ATPase family protein	PF04212,PF00004	PTHR23074:SF10,PTHR23074	KOG0740			GO:0005524,GO:0009378,GO:0006281,GO:0006310	AT2G45500.1
Gorai.001G173500	3	3	45	38	0	120	AT-hook motif nuclear-localized protein 22	PF03479						AT2G45430.1
Gorai.001G173600	13	11	17	1	7	7	N-terminal nucleophile aminohydrolases (Ntn hydrolases) superfamily protein	PF00227	PTHR11599,PTHR11599:SF8	KOG0179	3.4.25.1	K02732	GO:0004298,GO:0051603,GO:0005839	AT3G60820.1
Gorai.001G173700	4	4	39	3	2	2	NAD(P)-binding Rossmann-fold superfamily protein	PF01370	PTHR10366,PTHR10366:SF9	KOG1502			GO:0016491,GO:0008152,GO:0003854,GO:0016616,GO:0006694,GO:0055114,GO:0003824,GO:0050662,GO:0044237	AT2G45400.1
Gorai.001G173800	3	4	8	32	60	16
Gorai.001G173900	none	5	none	50	none	0	NAD(P)-binding Rossmann-fold superfamily protein	PF01370	PTHR10366,PTHR10366:SF9	KOG1502			GO:0003854,GO:0016616,GO:0006694,GO:0055114,GO:0003824,GO:0050662,GO:0044237,GO:0009058	AT2G45400.1
Gorai.001G174000	5	6	1	2	1	1	NAD(P)-binding Rossmann-fold superfamily protein	PF01370	PTHR10366,PTHR10366:SF9	KOG1502			GO:0003854,GO:0016616,GO:0006694,GO:0055114,GO:0003824,GO:0050662,GO:0044237,GO:0009058	AT2G45400.1
Gorai.001G174100	1	1	41	3	5	5	DHHC-type zinc finger family protein	PF01529	PTHR22883	KOG1315			GO:0008270	AT3G60800.1
Gorai.001G174200	5	2	5	5	1	3	ribosomal protein S13A	PF00312,PF08069	PTHR11885	KOG0400			GO:0003735,GO:0006412,GO:0005622,GO:0005840	AT4G00100.1
Gorai.001G174300	5	14	1	7	43	39	UDP-D-glucuronate 4-epimerase 3	PF01370	PTHR10366,PTHR10366:SF42	KOG1371	5.1.3.6	K08679	GO:0016491,GO:0008152,GO:0003854,GO:0016616,GO:0006694,GO:0055114,GO:0003824,GO:0050662,GO:0044237,GO:0009058,GO:0008831,GO:0045226	AT4G00110.1
Gorai.001G174400	49	5	5	10	56	1	RNA 3\'-terminal phosphate cyclase/enolpyruvate transferase, alpha/beta	PF00275	PTHR21090,PTHR21090:SF3	KOG0692	2.5.1.19	K00800	GO:0016765	AT2G45300.1
Gorai.001G174500	6	13	5	33	1	0	Protein of unknown function (DUF1997)	PF09366						AT4G31115.1
Gorai.001G174600	14	29	29	5	23	0	Transketolase	PF02779,PF02780,PF00456	PTHR11624:SF1,PTHR11624	KOG0523	2.2.1.1	K00615	GO:0003824,GO:0008152	AT2G45290.1
Gorai.001G174700	0	12	12	19	53	2	golgi snare 12	PF12352	PTHR21094	KOG3208		K08495	GO:0016021,GO:0006888,GO:0005801,GO:0000139	AT2G45200.1
Gorai.001G174800	1	9	6	0	27	78	Plant-specific transcription factor YABBY family protein	PF04690						AT2G45190.1
Gorai.001G174900	3	22	15	5	4	4	PLATZ transcription factor family protein	PF04640						AT3G60670.1
Gorai.001G175000	4	1	43	0	9	5	cytidinediphosphate diacylglycerol synthase 5	PF01148	PTHR13773	KOG1440			GO:0016772,GO:0016020	AT3G60620.1
Gorai.001G175100	7	1	0	0	15	5	putative endonuclease or glycosyl hydrolase with C2H2-type zinc finger domain							AT5G61190.1
Gorai.001G175200	24	4	0	6	5	5	RGPR-related		PTHR13402					AT5G47490.1
Gorai.001G175300	10	4	0	21	11	11	RGPR-related		PTHR13402,PTHR13402:SF6					AT5G47480.1
Gorai.001G175400	1	1	8	6	5	5	C2H2-like zinc finger protein		PTHR11389,PTHR11389:SF378					AT1G02030.1
Gorai.001G175500	22	none	11	none	150	none	C2H2-type zinc finger family protein		PTHR11389,PTHR11389:SF378					AT1G02040.1
Gorai.001G175600	14	1	1	55	107	6	Uncharacterised conserved protein UCP022280							AT2G45060.1
Gorai.001G175700	1	3	1	7	6	67	Plastid-lipid associated protein PAP / fibrillin family protein	PF04755					GO:0005198,GO:0009507	AT4G00030.1
Gorai.001G175800	4	16	3	4	2	17								AT3G60520.1
Gorai.001G175900	25	none	1	none	46	none	ribosomal protein S11	PF00411	PTHR11759,PTHR11759:SF3	KOG0407		K02948	GO:0003735,GO:0006412,GO:0005622,GO:0005840	ATCG00750.1
Gorai.001G176000	2	2	5	5	3	3	squamosa promoter binding protein-like 8	PF03110					GO:0003677,GO:0005634	AT1G02065.1
Gorai.001G176100	12	17	5	37	55	0	Polynucleotidyl transferase, ribonuclease H-like superfamily protein							AT5G65005.1
Gorai.001G176200	5	5	1	7	1	3	Translation elongation factor EFG/EF2 protein	PF03144,PF00679,PF03764,PF00009	PTHR23115,PTHR23115:SF13	KOG0465	3.6.5.3	K02355	GO:0003924,GO:0005525	AT1G45332.1
Gorai.001G176300	3	8	1	1	16	1	auxin-responsive family protein	PF04526	PTHR23130					AT3G07390.1
Gorai.001G176400	13	2	4	2	10	81	autophagy 3 (APG3)	PF03986,PF10381,PF03987	PTHR12866	KOG2981		K08343		AT5G61500.1
Gorai.001G176600	53	53	34	34	157	157	Integrase-type DNA-binding superfamily protein	PF00847					GO:0003700,GO:0006355	AT3G23230.1
Gorai.001G176700	21	3	38	14	120	0	Integrase-type DNA-binding superfamily protein	PF00847					GO:0003700,GO:0006355	AT3G23230.1
Gorai.001G176800	19	19	11	13	159	118	ethylene response factor 1	PF00847					GO:0003700,GO:0006355	AT3G23240.1
Gorai.001G176900	6	10	12	12	41	0	decapping 1	PF06058	PTHR16290					AT1G08370.1
Gorai.001G177000	1	1	6	3	2	5	actin depolymerizing factor 6	PF00241	PTHR11913	KOG1735			GO:0003779,GO:0005622	AT2G31200.1
Gorai.001G177100	1	0	6	14	5	0	myb domain protein 15	PF00249	PTHR10641	KOG0048		K09422	GO:0003677	AT3G23250.1
Gorai.001G177200	23	35	16	48	29	0	NADH dehydrogenase subunit J	PF00329	PTHR10884:SF1,PTHR10884	KOG1713	1.6.5.3	K05581	GO:0008137,GO:0055114	ATCG00420.1
Gorai.001G177300	25	39	16	44	29	0	ATP synthase subunit beta	PF00401,PF02823,PF00306	PTHR15184:SF23,PTHR15184				GO:0016820,GO:0015991,GO:0033178,GO:0046933,GO:0046961,GO:0015986,GO:0045261	ATCG00480.1
Gorai.001G177400	4	1	8	51	2	45								AT2G20500.1
Gorai.001G177500	3	3	18	2	37	4								AT2G20515.1
Gorai.001G177600	none	3	none	11	none	120	ENTH/VHS/GAT family protein	PF03127,PF00790	PTHR13856,PTHR13856:SF27				GO:0006886,GO:0005622	AT1G06210.1
Gorai.001G177700	6	5	2	1	10	1	Peptidase S24/S26A/S26B/S26C family protein		PTHR12383,PTHR12383:SF7	KOG1568				AT2G31140.1
Gorai.001G177800	4	5	24	36	16	1	DNA-directed RNA polymerase family protein	PF04997					GO:0003677,GO:0003899,GO:0006351	ATCG00180.1
Gorai.001G178000	1	1	1	1	0	6	ARM repeat superfamily protein	PF00514,PF04564	PTHR23315:SF43,PTHR23315				GO:0005515,GO:0004842,GO:0016567,GO:0000151	AT3G54790.1
Gorai.001G178100	3	0	34	5	88	0	Protein of unknown function (DUF640)	PF04852						AT2G31160.1
Gorai.001G178200	19	none	46	none	7	none			PTHR11697,PTHR11697:SF9					AT4G09660.1
Gorai.001G178400	6	6	4	17	42	41	Ribosomal L29e protein family	PF01779	PTHR12884	KOG3504		K02905	GO:0003735,GO:0006412,GO:0005622,GO:0005840	AT3G06680.1
Gorai.001G178500	13	2	1	1	81	1	Sugar isomerase (SIS) family protein	PF00571,PF01380	PTHR11911,PTHR11911:SF24				GO:0005515,GO:0005529,GO:0005975	AT3G54690.1
Gorai.001G178600	4	7	1	5	4	31	Transcription factor jumonji (jmj) family protein / zinc finger (C5HC2 type) family protein	PF02375,PF02373,PF02928	PTHR10694,PTHR10694:SF8				GO:0005515,GO:0005634	AT2G38950.1
Gorai.001G178700	12	12	18	18	104	104	nodulin MtN21 /EamA-like transporter family protein							AT3G53210.1
Gorai.001G178800	9	9	24	9	69	78	NAC domain containing protein 74	PF02365					GO:0003677,GO:0006355	AT4G28530.1
Gorai.001G179000	5	5	1	2	1	1	ribophorin II (RPN2) family protein	PF05817	PTHR12640	KOG2447			GO:0004579,GO:0018279,GO:0005789,GO:0008250	AT4G21150.1
Gorai.001G179100	49	14	5	0	5	10	non-intrinsic ABC protein 4	PF07933	PTHR12847	KOG2500			GO:0006897,GO:0016020	AT1G03900.1
Gorai.001G179200	0	6	1	1	1	1			PTHR13167,PTHR13167:SF1					AT2G48060.1
Gorai.001G179300	2	2	5	1	3	1	casein kinase I-like 6	PF00069	PTHR11909:SF18,PTHR11909	KOG1163			GO:0004672,GO:0005524,GO:0006468	AT4G28540.1
Gorai.001G179400	1	16	4	4	80	17	vacuolar protein sorting-associated protein 2.3	PF03357	PTHR10476,PTHR10476:SF4	KOG3230			GO:0015031	AT1G03950.1
Gorai.001G179500	69	0	30	5	0	4
Gorai.001G179600	2	2	1	7	1	3	Calcium-binding EF-hand family protein	PF08616	PTHR14095	KOG2562				AT5G44090.1
Gorai.001G179700	3	9	12	8	4	5	ROP-interactive CRIB motif-containing protein 7	PF00560	PTHR24420	KOG4579			GO:0005515	AT4G28560.1
Gorai.001G179800	2	2	56	1	14	1	Long-chain fatty alcohol dehydrogenase family protein	PF05199,PF00732	PTHR10668,PTHR10668:SF14	KOG1238			GO:0016614,GO:0050660,GO:0055114,GO:0009055,GO:0016491	AT4G28570.1
Gorai.001G179900	5	6	5	1	3	1	ATP citrate lyase (ACL) family protein	PF00549,PF08442	PTHR11815	KOG2799	6.2.1.4,6.2.1.5	K01900	GO:0003824,GO:0008152	AT2G20420.1
Gorai.001G180000	6	14	1	5	1	3	ATP citrate lyase (ACL) family protein	PF00549,PF08442	PTHR11815	KOG2799	6.2.1.4,6.2.1.5	K01900	GO:0003824,GO:0008152	AT2G20420.1
Gorai.001G180100	6	6	9	26	48	0	HISTIDINE TRIAD NUCLEOTIDE-BINDING 2	PF11969	PTHR23089					AT1G31160.1
Gorai.001G180200	10	3	10	30	0	0	Major facilitator superfamily protein	PF00854	PTHR11654:SF37,PTHR11654				GO:0005215,GO:0006857,GO:0016020	AT5G46040.1
Gorai.001G180400	2	2	53	1	1	1	HAD superfamily, subfamily IIIB acid phosphatase	PF03767	PTHR11726,PTHR11726:SF1				GO:0003993	AT1G04040.1
Gorai.001G180500	2	2	4	1	1	1		PF11107						AT5G44010.1
Gorai.001G180600	25	none	16	none	29	none	Photosystem I, PsaA/PsaB protein	PF00223					GO:0015979,GO:0009522,GO:0009579,GO:0016021	ATCG00340.1
Gorai.001G180700	23	27	16	36	29	0	ribosomal protein S16	PF00886	PTHR12919,PTHR12919:SF3				GO:0003735,GO:0006412,GO:0005622,GO:0005840	ATCG00050.1
Gorai.001G180800	25	none	16	none	29	none
Gorai.001G180900	17	5	17	10	0	33	Ribosomal protein L14p/L23e family protein	PF00238	PTHR11761	KOG0901		K02894	GO:0003735,GO:0006412,GO:0005840	AT3G04400.1
Gorai.001G181000	0	0	5	1	3	3	Glutathione S-transferase family protein	PF00043	PTHR11260,PTHR11260:SF67	KOG2903				AT5G44000.1
Gorai.001G181100	42	none	36	none	0	none
Gorai.001G181200	1	7	3	19	2	75	plasmodesmata-located protein 1	PF01657	PTHR11795:SF83,PTHR11795					AT5G43980.1
Gorai.001G181300	6	6	1	2	70	7	translocase of outer membrane 22-V		PTHR12504					AT5G43970.1
Gorai.001G181400	3	3	15	8	1	37								AT4G21865.1
Gorai.001G181500	7	3	21	7	44	4	Tetratricopeptide repeat (TPR)-like superfamily protein		PTHR17204:SF8,PTHR17204	KOG1258				AT1G04080.1
Gorai.001G181600	5	2	1	7	1	40	Nuclear transport factor 2 (NTF2) family protein with RNA binding (RRM-RBD-RNP motifs) domain	PF00076,PF02136	PTHR10693:SF8,PTHR10693	KOG0116			GO:0003676,GO:0006810,GO:0005622	AT5G43960.1
Gorai.001G181700	18	1	23	4	7	7								AT2G20390.1
Gorai.001G181800	20	20	1	4	6	80	indole-3-acetic acid inducible 11	PF02309					GO:0006355,GO:0005634	AT4G28640.2
Gorai.001G181900	8	7	18	24	65	4	Leucine-rich repeat transmembrane protein kinase family protein	PF00069,PF00560,PF08263	PTHR24420:SF883,PTHR24420	KOG1187			GO:0004672,GO:0005524,GO:0006468,GO:0005515	AT4G28650.1
Gorai.001G182000	14	14	1	7	39	39	Haem oxygenase-like, multi-helical	PF03070	PTHR20858:SF7,PTHR20858					AT5G32470.1
Gorai.001G182100	3	3	7	1	22	4	photosystem II reaction center PSB28 protein	PF03912				K08903	GO:0015979,GO:0009523,GO:0009654,GO:0016020	AT4G28660.1
Gorai.001G182200	4	1	6	0	5	13	Subtilase family protein	PF05922,PF00082,PF03016,PF02225	PTHR10795,PTHR10795:SF17				GO:0004252,GO:0006508,GO:0016020,GO:0042802,GO:0043086	AT1G04110.1
Gorai.001G182300	46	43	33	36	0	0								AT2G20362.1
Gorai.001G182400	4	1	6	16	9	5	multidrug resistance-associated protein 5	PF00664,PF00005	PTHR24223,PTHR24223:SF202	KOG0054			GO:0005524,GO:0016887,GO:0042626,GO:0006810,GO:0055085,GO:0016021	AT1G04120.1
Gorai.001G182500	24	2	2	5	0	26	Pyridoxal phosphate (PLP)-dependent transferases superfamily protein	PF00282	PTHR11999,PTHR11999:SF11	KOG0628	4.1.1.25	K01592	GO:0016831,GO:0030170,GO:0019752	AT2G20340.1
Gorai.001G182600	74	6	1	1	0	18	Protein phosphatase 2C family protein	PF00481	PTHR13832,PTHR13832:SF160				GO:0003824	AT3G06270.1
Gorai.001G182700	1	10	0	10	5	4	GroES-like zinc-binding dehydrogenase family protein	PF00107,PF08240	PTHR11695,PTHR11695:SF4	KOG0022			GO:0008270,GO:0016491,GO:0055114	AT5G43940.1
Gorai.001G182800	1	1	7	14	126	5	Transducin family protein / WD-40 repeat family protein	PF00400	PTHR22874,PTHR22874:SF1	KOG0266			GO:0005515	AT1G04140.2
Gorai.001G182900	0	24	7	7	3	1	Protein kinase superfamily protein	PF07714	PTHR24420:SF804,PTHR24420	KOG1187			GO:0004672,GO:0005524,GO:0006468	AT2G20300.1
Gorai.001G183000	8	8	1	1	4	1	C2 calcium/lipid-binding plant phosphoribosyltransferase family protein	PF00168,PF08372	PTHR10024:SF97,PTHR10024				GO:0005515	AT1G04150.1
Gorai.001G183100	53	19	24	32	0	6
Gorai.001G183200	4	2	4	4	16	0	Flavin-binding monooxygenase family protein	PF00743	PTHR23023:SF5,PTHR23023	KOG1399			GO:0004499,GO:0050660,GO:0050661,GO:0055114,GO:0016491	AT4G28720.1
Gorai.001G183300	1	1	21	8	52	0	CLIP-associated protein	PF12348,PF02985	PTHR21567,PTHR21567:SF15				GO:0005515	AT2G20190.1
Gorai.001G183400	9	9	47	39	138	27	phytochrome interacting factor 3-like 5	PF00010	PTHR12565:SF25,PTHR12565	KOG4304			GO:0030528,GO:0006355	AT2G20180.2
Gorai.001G183500	1	38	5	4	6	12	Pyridoxal phosphate (PLP)-dependent transferases superfamily protein	PF04864,PF04863	PTHR11751,PTHR11751:SF162	KOG0257			GO:0016740,GO:0030170,GO:0009058,GO:0016846	AT1G34060.1
Gorai.001G183600	5	2	5	5	3	3
Gorai.001G183700	2	5	5	5	1	3
Gorai.001G183800	3	8	4	4	28	14	glycine-rich protein							AT4G29020.2
Gorai.001G184000	6	6	25	25	99	99	C2H2 and C2HC zinc fingers superfamily protein	PF06220	PTHR16465	KOG3454			GO:0008270	AT5G26749.1
Gorai.001G184100	1	3	1	36	106	35	Protein of unknown function (PD694200)							AT1G56233.1
Gorai.001G184300	1	9	8	6	5	47	AP2/B3-like transcriptional factor family protein	PF02362					GO:0003677,GO:0006355	AT3G24650.1
Gorai.001G184400	1	3	18	8	37	37	Leucine-rich repeat transmembrane protein kinase family protein	PF00069,PF00560,PF08263	PTHR24420,PTHR24420:SF784	KOG1187			GO:0004672,GO:0005524,GO:0006468,GO:0005515	AT5G48940.1
Gorai.001G184500	none	11	none	44	none	1	Phototropic-responsive NPH3 family protein	PF03000					GO:0004871,GO:0009416	AT5G17580.1
Gorai.001G184600	2	2	5	8	3	53	Pectin lyase-like superfamily protein	PF00544			4.2.2.2	K01728		AT4G13710.1
Gorai.001G184700	1	14	4	4	8	97	UDP-Glycosyltransferase superfamily protein	PF00201,PF03033	PTHR11926	KOG1192	2.4.1.173	K05841	GO:0016758,GO:0008152,GO:0005975,GO:0030259	AT3G07020.2
Gorai.001G184900	6	13	12	14	41	8	SNARE-like superfamily protein		PTHR11043					AT1G15370.1
Gorai.001G185000	2	2	12	12	1	1	beta-ureidopropionase							AT5G64370.1
Gorai.001G185100	15	17	6	40	9	16	Protein kinase superfamily protein with octicosapeptide/Phox/Bem1p domain	PF07714,PF00564	PTHR23257:SF68,PTHR23257	KOG0192			GO:0004672,GO:0005524,GO:0006468,GO:0005515	AT3G24715.1
Gorai.001G185200	1	4	6	1	5	16	peroxisomal 3-ketoacyl-CoA thiolase 3	PF02803,PF00108	PTHR18919:SF15,PTHR18919	KOG1389			GO:0016747,GO:0008152	AT2G33150.1
Gorai.001G185300	1	18	3	2	2	21	Small nuclear ribonucleoprotein family protein	PF01423	PTHR20971	KOG1775		K12624		AT5G48870.1
Gorai.001G185400	18	3	1	12	4	28	Ribonuclease H-like superfamily protein							AT4G29090.1
Gorai.001G185500	1	1	3	2	24	24	Protein of unknown function (DUF1644)	PF07800						AT3G24740.1
Gorai.001G185600	7	7	36	36	0	0
Gorai.001G185700	1	11	4	4	128	14	Tetratricopeptide repeat (TPR)-like superfamily protein		PTHR23083,PTHR23083:SF200					AT5G48850.1
Gorai.001G185900	5	5	40	5	0	3	homolog of bacterial PANC	PF02569	PTHR21299,PTHR21299:SF1	KOG3042	6.3.2.1	K01918	GO:0004592,GO:0015940	AT5G48840.1
Gorai.001G186000	1	1	15	3	2	2	vesicle-associated membrane protein 726	PF00957	PTHR21136,PTHR21136:SF46	KOG0859		K08511	GO:0016192,GO:0016021	AT1G04760.1
Gorai.001G186100	18	6	3	2	17	7								AT4G13200.1
Gorai.001G186200	2	6	2	1	3	1	GTP-binding family protein	PF08701,PF01926	PTHR11089:SF14,PTHR11089	KOG2484		K14538	GO:0005525,GO:0015093,GO:0015684,GO:0016021,GO:0005622	AT3G07050.1
Gorai.001G186300	0	1	9	2	75	45	CLAVATA3/ESR-RELATED 44							AT4G13195.1
Gorai.001G186400	22	none	31	none	0	none
Gorai.001G186500	none	10	none	2	none	0	NADH:ubiquinone oxidoreductase, 17.2kDa subunit							AT3G03100.2
Gorai.001G186700	0	16	6	2	2	1	Ribosomal protein L13 family protein	PF00572	PTHR11545	KOG3204		K02872	GO:0003735,GO:0006412,GO:0005840	AT5G48760.1
Gorai.001G186800	2	2	1	1	0	1	Leucine-rich repeat protein kinase family protein	PF11721,PF00069,PF00560	PTHR24420:SF549,PTHR24420	KOG1187			GO:0004672,GO:0005524,GO:0006468,GO:0005515	AT5G48740.1
Gorai.001G186900	7	0	1	1	16	1	Protein of unknown function, DUF593	PF04576						AT4G13630.1
Gorai.001G187000	12	1	4	1	10	39	Sec14p-like phosphatidylinositol transfer family protein	PF03765,PF00650	PTHR23324,PTHR23324:SF5	KOG1471				AT3G24840.1
Gorai.001G187100	7	7	0	13	75	146	Helicase/SANT-associated, DNA binding protein	PF07529						AT3G24870.1
Gorai.001G187200	11	11	4	4	10	10	Uncharacterised protein family SERF	PF04419	PTHR13596	KOG4488				AT3G24100.1
Gorai.001G187300	27	27	11	11	0	0	MUTS homolog 6	PF00488	PTHR11361:SF31,PTHR11361				GO:0005524,GO:0030983,GO:0006298	AT4G02070.1
Gorai.001G187400	26	3	25	42	120	35	RING/U-box superfamily protein		PTHR12183	KOG1813				AT3G25030.1
Gorai.001G187500	3	8	2	7	87	22	x-ray induced transcript 1							AT5G48720.2
Gorai.001G187600	53	27	37	5	19	3	Polynucleotidyl transferase, ribonuclease H-like superfamily protein							AT2G34320.1
Gorai.001G187700	none	6	none	9	none	48								AT3G11290.1
Gorai.001G187800	41	2	1	1	0	4	Ubiquitin carboxyl-terminal hydrolase family protein	PF11955						AT3G63090.1
Gorai.001G187900	12	5	10	2	45	7	endoplasmic reticulum retention defective 2B	PF00810	PTHR10585	KOG3106		K10949	GO:0046923,GO:0006621,GO:0016021	AT3G25040.1
Gorai.001G188000	0	5	5	5	3	23	GPI transamidase component Gpi16 subunit family protein	PF04113	PTHR12959,PTHR12959:SF11	KOG2407		K05292	GO:0016021,GO:0042765	AT3G07140.1
Gorai.001G188100	2	2	2	7	1	1	RING/U-box superfamily protein	PF00097	PTHR23041,PTHR23041:SF16	KOG0320				AT5G48655.1
Gorai.001G188200	36	3	3	39	12	17
Gorai.001G188300	1	2	2	2	13	50	Integrase-type DNA-binding superfamily protein	PF00847					GO:0003700,GO:0006355	AT4G13040.3
Gorai.001G188400	2	2	1	1	1	1								AT3G25130.1
Gorai.001G188500	8	15	9	9	0	9	Nucleotide-diphospho-sugar transferases superfamily protein	PF01501	PTHR13778:SF3,PTHR13778		2.4.1.43	K13648	GO:0016757	AT3G25140.1
Gorai.001G188600	9	4	1	49	6	71	cytochrome P450, family 82, subfamily C, polypeptide 4	PF00067	PTHR24298:SF44,PTHR24298	KOG0156			GO:0005506,GO:0009055,GO:0016705,GO:0020037,GO:0055114	AT4G31940.1
Gorai.001G188700	4	2	1	7	16	23	Pentatricopeptide repeat (PPR) superfamily protein	PF01535	PTHR24015					AT3G07290.1
Gorai.001G188900	none	22	none	46	none	133		PF05498
Gorai.001G189000	2	2	1	1	3	3
Gorai.001G189300	4	3	25	31	77	12	Heavy metal transport/detoxification superfamily protein	PF00403	PTHR22814,PTHR22814:SF5				GO:0046872,GO:0030001	AT5G48290.1
Gorai.001G189400	23	none	16	none	29	none	Chloroplast Ycf2;ATPase, AAA type, core	PF05695					GO:0005524,GO:0009507	ATCG01280.1
Gorai.001G189500	7	0	15	13	1	4	Exostosin family protein	PF03016	PTHR11062,PTHR11062:SF1	KOG1021			GO:0016020	AT5G03795.1
Gorai.001G189600	3	22	22	38	4	120	Exostosin family protein	PF03016	PTHR11062,PTHR11062:SF1	KOG1021			GO:0016020	AT3G07620.1
Gorai.001G189800	1	6	31	31	0	1	starch branching enzyme 2.1							AT2G36390.1
Gorai.001G189900	12	1	4	4	10	8	Got1/Sft2-like vescicle transport protein family	PF04178	PTHR23137	KOG2887			GO:0016192,GO:0016021,GO:0006810	AT4G26550.1
Gorai.001G190000	2	2	1	5	26	23	CONSTANS-like 9	PF06203					GO:0005515	AT3G07650.1
Gorai.001G190100	0	0	2	9	4	27		PF07890	PTHR13245:SF1,PTHR13245	KOG2974				AT5G48240.1
Gorai.001G190200	2	6	0	1	1	18	ubiquitin-specific protease 20							AT4G17895.1
Gorai.001G190300	16	9	4	3	17	27	RING/U-box superfamily protein	PF00097	PTHR22937,PTHR22937:SF6					AT2G04240.1
Gorai.001G190400	17	1	5	1	62	24								AT2G04280.1
Gorai.001G190600	6	6	25	25	99	99
Gorai.001G190700	1	1	6	0	5	5	ARM repeat superfamily protein	PF00514	PTHR23315:SF37,PTHR23315				GO:0005515	AT4G12710.1
Gorai.001G190800	3	15	2	1	1	38	RNA-binding (RRM/RBD/RNP motifs) family protein	PF00076	PTHR24012:SF14,PTHR24012				GO:0003676	AT3G13224.2
Gorai.001G190900	7	3	0	2	13	13	Rubisco methyltransferase family protein	PF09273,PF00856	PTHR13271	KOG1337			GO:0005515	AT3G07670.1
Gorai.001G191000	2	5	49	1	82	59	Aldolase-type TIM barrel family protein	PF00218	PTHR22854,PTHR22854:SF2	KOG4201	4.1.1.48	K01609	GO:0004425	AT5G48220.1
Gorai.001G191200	10	0	6	7	23	52	Protein kinase superfamily protein	PF03109	PTHR10566,PTHR10566:SF10	KOG1235				AT3G07700.1
Gorai.001G191300	19	19	15	15	102	102	photosynthetic electron transfer D	PF00032	PTHR19271				GO:0009055,GO:0016491,GO:0016020,GO:0022904	ATCG00730.1
Gorai.001G191400	1	1	13	1	46	46								AT2G04480.1
Gorai.001G191500	5	0	18	5	100	0	Protein of unknown function (DUF803)	PF05653	PTHR12570					AT1G71900.1
Gorai.001G191600	2	2	2	1	1	1	Sterile alpha motif (SAM) domain-containing protein	PF07647					GO:0005515	AT3G07760.1
Gorai.001G191700	4	4	6	2	9	13	DNAJ heat shock N-terminal domain-containing protein	PF00226,PF11926	PTHR25040:SF41,PTHR25040				GO:0031072	AT2G05250.1
Gorai.001G191900	0	6	15	15	0	1	Tetratricopeptide repeat (TPR)-like superfamily protein	PF01535	PTHR24015					AT1G08070.1
Gorai.001G192000	48	48	20	1	90	16	photosystem II light harvesting complex gene 2.1	PF00504	PTHR21649			K08913	GO:0016020,GO:0009765	AT2G05100.1
Gorai.001G192100	45	none	24	none	0	none
Gorai.001G192200	14	2	8	10	0	1	Pentatricopeptide repeat (PPR-like) superfamily protein	PF01535	PTHR24015					AT4G18840.1
Gorai.001G192300	0	48	10	10	3	16	photosystem II light harvesting complex gene 2.1	PF00504	PTHR21649			K08913	GO:0016020,GO:0009765	AT2G05100.1
Gorai.001G192400	1	4	4	6	2	9	histidine kinase 2	PF00512,PF00072,PF02518,PF03924	PTHR24423,PTHR24423:SF37	KOG0519	2.7.13.3	K14489	GO:0000156,GO:0000160,GO:0006355,GO:0000155,GO:0007165,GO:0016020,GO:0005524	AT5G35750.1
Gorai.001G192500	1	19	4	9	80	159	Carbohydrate-binding X8 domain superfamily protein	PF07983	PTHR16631:SF1,PTHR16631					AT5G35740.1
Gorai.001G192600	1	1	4	4	8	8		PF04241	PTHR10580	KOG3472				AT2G04900.1
Gorai.001G192700	0	20	1	0	1	7	Ethylene insensitive 3 family protein	PF04873					GO:0005634,GO:0030528	AT3G20770.1
Gorai.001G192800	3	8	3	1	0	28	GRAS family transcription factor	PF03514						AT5G48150.1
Gorai.001G192900	4	4	6	6	2	25	zinc-dependent activator protein-1	PF03106					GO:0003700,GO:0043565,GO:0006355	AT2G04880.2
Gorai.001G193000	2	7	5	7	3	4	Aminotransferase-like, plant mobile domain family protein	PF10536	PTHR11668,PTHR11668:SF94					AT2G04865.1
Gorai.001G193100	2	2	1	1	1	1	RNA-binding (RRM/RBD/RNP motifs) family protein	PF00076	PTHR24012:SF14,PTHR24012	KOG4205			GO:0003676	AT3G07810.1
Gorai.001G193200	6	2	4	2	10	81	Acyl-CoA N-acyltransferases (NAT) superfamily protein	PF08445	PTHR13256	KOG4135			GO:0008080,GO:0016747	AT2G04845.1
Gorai.001G193300	none	3	none	0	none	34	zinc ion binding;nucleic acid binding							AT2G01050.1
Gorai.001G193400	6	6	1	1	18	18	transcription regulators	PF09174						AT5G13240.1
Gorai.001G193500	4	4	10	10	16	16	secretion-associated RAS super family 2	PF00025,PF00010	PTHR12565,PTHR12565:SF7				GO:0005525,GO:0030528,GO:0006355	AT4G02080.1
Gorai.001G193600	21	21	9	9	13	94	Auxin-responsive family protein	PF03188,PF04526	PTHR23130,PTHR23130:SF18	KOG4293			GO:0016021	AT5G35735.1
Gorai.001G193700	1	17	2	0	13	62	threonyl-tRNA synthetase, putative / threonine--tRNA ligase, putative	PF03129,PF00587,PF07973	PTHR11451,PTHR11451:SF5	KOG1637	6.1.1.3	K01868	GO:0000166,GO:0004812,GO:0005524,GO:0006418,GO:0005737,GO:0016876,GO:0043039,GO:0006412	AT2G04842.1
Gorai.001G193800	none	1	none	25	none	77	Pectin lyase-like superfamily protein	PF00295			3.2.1.67	K01213	GO:0004650,GO:0005975	AT3G07820.1
Gorai.001G194000	none	0	none	31	none	8								AT5G35732.1
Gorai.001G194100	5	5	1	1	1	1
Gorai.001G194200	4	1	3	9	2	0	F-box and associated interaction domains-containing protein	PF08268,PF00646					GO:0005515	AT3G07870.1
Gorai.001G194400	1	13	3	2	2	10	FASCICLIN-like arabinoogalactan 7	PF02469	PTHR10900:SF23,PTHR10900					AT2G04780.1
Gorai.001G194500	3	1	16	18	22	66	Ypt/Rab-GAP domain of gyp1p superfamily protein	PF00566	PTHR22957:SF99,PTHR22957	KOG2058			GO:0005097,GO:0032313,GO:0005622	AT3G07890.1
Gorai.001G194600	1	1	19	9	2	123
Gorai.001G194700	13	5	17	0	10	113	Ubiquinol-cytochrome C reductase iron-sulfur subunit	PF02921	PTHR10134				GO:0008121,GO:0055114,GO:0016679	AT5G13440.1
Gorai.001G194900	1	1	34	34	79	79	Calcium-binding EF-hand family protein		PTHR24753,PTHR24753:SF14					AT2G44310.1
Gorai.001G195000	1	1	3	19	2	36	centromere/kinetochore protein, putative (ZW10)	PF06248	PTHR12205	KOG2163		K11578	GO:0007067,GO:0000775,GO:0005634	AT2G32900.1
Gorai.001G195100	5	5	1	1	1	59	PDI-like 2-2	PF00085	PTHR18929	KOG0191	5.3.4.1	K09584	GO:0045454	AT1G04980.1
Gorai.001G195200	5	0	0	33	1	0	Myzus persicae-induced lipase 1	PF00561,PF04083	PTHR11005	KOG2624			GO:0006629	AT5G14180.1
Gorai.001G195300	6	6	23	23	142	142	FAD/NAD(P)-binding oxidoreductase family protein	PF01266	PTHR16128				GO:0050660,GO:0008033,GO:0016491,GO:0055114,GO:0003857,GO:0006631	AT1G55980.1
Gorai.001G195400	28	none	54	none	0	none	Myzus persicae-induced lipase 1	PF00561,PF04083	PTHR11005	KOG2624			GO:0006629	AT5G14180.1
Gorai.001G195500	1	4	4	0	52	30								AT1G04985.1
Gorai.001G195600	1	14	2	4	107	30	Zinc finger C-x8-C-x5-C-x3-H type family protein	PF00642	PTHR12506,PTHR12506:SF11	KOG1677			GO:0003676,GO:0008270	AT1G04990.1
Gorai.001G195700	7	7	1	0	4	51	Argonaute family protein	PF02170,PF02171,PF08699	PTHR22891	KOG1041			GO:0005515	AT2G32940.1
Gorai.001G195800	2	2	1	1	1	1
Gorai.001G195900	2	9	1	2	1	159	Phosphotyrosine protein phosphatases superfamily protein	PF03162		KOG1572				AT1G05000.1
Gorai.001G196100	3	3	9	9	27	27	GRF zinc finger / Zinc knuckle protein	PF00098				K10569	GO:0003676,GO:0008270	AT5G13920.1
Gorai.001G196200	8	2	16	6	32	92								AT2G32970.2
Gorai.001G196300	1	1	29	3	89	5	Major facilitator superfamily protein	PF00083	PTHR24063,PTHR24063:SF84	KOG0254			GO:0022857,GO:0055085,GO:0016021	AT1G05030.1
Gorai.001G196400	4	1	6	6	0	5	Major facilitator superfamily protein	PF00854	PTHR11654:SF37,PTHR11654	KOG1237			GO:0005215,GO:0006857,GO:0016020	AT3G21670.1
Gorai.001G196500	9	9	13	7	21	52	reversibly glycosylated polypeptide 1	PF03214			2.4.1.-,5.4.99.-	K13379	GO:0008466,GO:0016758,GO:0007047,GO:0030244,GO:0005618,GO:0030054	AT3G02230.1
Gorai.001G196700	13	2	2	13	50	1	Protein kinase superfamily protein	PF03109	PTHR10566	KOG1235		K08869		AT1G65950.1
Gorai.001G196800	1	none	28	none	6	none	zinc finger protein 4		PTHR10042:SF14,PTHR10042					AT1G66140.1
Gorai.001G196900	none	1	none	8	none	63	Eukaryotic aspartyl protease family protein	PF00026	PTHR13683,PTHR13683:SF98	KOG1339			GO:0004190,GO:0006508	AT3G12700.1
Gorai.001G197000	1	1	3	3	2	5	RING/U-box superfamily protein	PF00097	PTHR22766,PTHR22766:SF20					AT5G15790.1
Gorai.001G197100	17	15	2	5	72	122	NADH-ubiquinone dehydrogenase, mitochondrial, putative	PF09326,PF00111,PF00384,PF10588	PTHR11615:SF10,PTHR11615	KOG2282	1.6.5.3,1.6.99.3	K03934	GO:0009055,GO:0051536,GO:0016491,GO:0055114,GO:0016651	AT5G37510.2
Gorai.001G197200	2	3	16	17	40	33	general regulatory factor 3	PF00244	PTHR18860	KOG0841			GO:0019904	AT5G38480.1
Gorai.001G197300	11	11	10	10	1	1	Root hair defective 3 GTP-binding protein (RHD3)							AT3G13870.1
Gorai.001G197400	15	2	7	5	23	3	Transducin/WD40 repeat-like superfamily protein	PF00400	PTHR19852,PTHR19852:SF6	KOG0282		K12816	GO:0005515	AT1G10580.1
Gorai.001G197500	15	13	1	8	38	64	BES1-interacting Myc-like protein 2	PF00010	PTHR12565:SF27,PTHR12565				GO:0030528,GO:0006355	AT1G69010.1
Gorai.001G197600	1	1	3	9	2	2	alpha/beta-Hydrolases superfamily protein	PF01738	PTHR17630,PTHR17630:SF19	KOG3043	3.1.1.45	K01061	GO:0016787	AT2G32520.1
Gorai.001G197700	12	12	3	4	80	8	Acid phosphatase/vanadium-dependent haloperoxidase-related protein	PF02681						AT3G21610.1
Gorai.001G197800	2	2	5	5	33	3	breast basic conserved 1	PF01294	PTHR11722	KOG3295			GO:0003735,GO:0006412,GO:0005622,GO:0005840	AT3G49010.1
Gorai.001G197900	5	15	20	2	3	94	ribosomal protein S27	PF01667	PTHR11594	KOG1779		K02978	GO:0003735,GO:0006412,GO:0005622,GO:0005840	AT3G61110.1
Gorai.001G198000	29	2	1	4	0	110	Endomembrane protein 70 protein family	PF02990	PTHR10766,PTHR10766:SF14	KOG1277			GO:0016021	AT5G37310.1
Gorai.001G198100	4	4	8	8	34	34	receptor-like kinase 1	PF00069,PF00560,PF08263	PTHR24420,PTHR24420:SF537	KOG1187			GO:0004672,GO:0005524,GO:0006468,GO:0005515	AT1G48480.1
Gorai.001G198200	6	6	17	0	41	1	Ypt/Rab-GAP domain of gyp1p superfamily protein							AT3G55020.1
Gorai.001G198300	1	4	1	1	6	6	Tetratricopeptide repeat (TPR)-like superfamily protein	PF01535	PTHR24015,PTHR24015:SF92					AT3G22150.1
Gorai.001G198400	14	5	1	1	1	1	Pyridoxal phosphate (PLP)-dependent transferases superfamily protein	PF00266	PTHR21152:SF1,PTHR21152	KOG2790	2.6.1.52	K00831	GO:0008152	AT2G17630.1
Gorai.001G198500	2	2	1	2	3	3	Polynucleotide adenylyltransferase family protein	PF01743	PTHR13734:SF12,PTHR13734	KOG2159			GO:0003723,GO:0016779,GO:0006396	AT2G17580.1
Gorai.001G198600	3	3	11	11	61	61	zinc finger (C2H2 type) family protein							AT4G35700.1
Gorai.001G198700	1	1	15	0	0	77	catalase 2	PF00199	PTHR11465	KOG0047			GO:0004096,GO:0020037,GO:0055114	AT4G35090.1
Gorai.001G198800	1	1	6	7	93	52	Rab escort protein	PF00996	PTHR11787	KOG4405				AT3G06540.1
Gorai.001G198900	18	9	6	4	82	12	high mobility group B4	PF00505	PTHR13711:SF70,PTHR13711	KOG0381			GO:0005515,GO:0003677	AT2G17560.3
Gorai.001G199000	11	11	2	4	81	14	Expressed protein	PF03266	PTHR20953		3.6.1.15	K06928	GO:0005524,GO:0016740,GO:0019204	AT5G66005.3
Gorai.001G199100	2	16	1	3	1	17								AT2G17550.1
Gorai.001G199200	4	1	3	2	2	13	WUSCHEL related homeobox 13	PF00046	PTHR24329:SF295,PTHR24329	KOG0490			GO:0003700,GO:0043565,GO:0006355	AT4G35550.1
Gorai.001G199300	4	4	19	2	2	13								AT4G35510.1
Gorai.001G199400	14	5	40	1	1	1	Calcium-binding EF hand family protein		PTHR11216:SF12,PTHR11216	KOG0998				AT1G21630.1
Gorai.001G199500	0	3	14	11	133	88
Gorai.001G199600	18	0	5	2	3	0	mitochondrial ribosomal protein L11	PF03946,PF00298	PTHR11661	KOG3257			GO:0003735,GO:0006412,GO:0005840	AT4G35490.1
Gorai.001G199700	15	17	5	1	23	4	ribonuclease II family protein	PF00773	PTHR23355,PTHR23355:SF13	KOG2102	3.1.13.-	K12585	GO:0003723,GO:0004540	AT2G17510.1
Gorai.001G199800	3	3	2	7	4	22	Protein kinase superfamily protein	PF07714	PTHR23257,PTHR23257:SF25	KOG0192			GO:0004672,GO:0005524,GO:0006468	AT5G58520.1
Gorai.001G199900	8	2	4	4	12	0	Auxin efflux carrier family protein	PF03547		KOG2722			GO:0055085,GO:0016021	AT2G17500.1
Gorai.001G200000	2	8	2	2	1	15	Seven transmembrane MLO family protein	PF03094				K08472	GO:0008219,GO:0016021	AT2G17480.1
Gorai.001G200100	7	7	18	4	37	87	plant intracellular ras group-related LRR 4	PF00560	PTHR23155,PTHR23155:SF267	KOG0617			GO:0005515	AT4G35470.1
Gorai.001G200200	1	14	8	4	5	30		PF07919,PF11817	PTHR14374					AT5G65950.1
Gorai.001G200300	3	2	6	2	9	62	serine/threonine phosphatase 7	PF00149	PTHR11668,PTHR11668:SF7	KOG0376			GO:0016787	AT5G63870.1
Gorai.001G200400	53	53	34	34	157	157	TCP family transcription factor	PF03634						AT1G67260.2
Gorai.001G200600	4	50	6	6	9	9	little nuclei1			KOG0978				AT1G67230.1
Gorai.001G200700	23	none	38	none	35	none	Heavy metal transport/detoxification superfamily protein	PF00403	PTHR22814,PTHR22814:SF16	KOG1603			GO:0046872,GO:0030001	AT5G19090.2
Gorai.001G200800	25	none	16	none	29	none
Gorai.001G200900	2	2	1	1	1	1	Protein of unknown function, DUF593	PF04576						AT5G16720.1
Gorai.001G201000	6	6	9	9	48	48	exocyst complex component sec15B							AT4G02350.1
Gorai.001G201100	6	6	32	32	147	147	Insulinase (Peptidase family M16) family protein	PF05193	PTHR11851:SF66,PTHR11851				GO:0004222,GO:0008270,GO:0006508	AT1G06900.1
Gorai.001G201200	3	3	0	28	34	4	high mobility group A	PF00538,PF02178					GO:0003677,GO:0006334,GO:0000786,GO:0005634	AT1G14900.1
Gorai.001G201300	25	none	12	none	135	none	photosystem II reaction center protein B	PF00421					GO:0016168,GO:0009767,GO:0019684,GO:0009521,GO:0016020	ATCG00680.1
Gorai.001G201400	2	5	4	1	1	1	general regulatory factor 3	PF00244	PTHR18860	KOG0841		K06630	GO:0019904	AT5G38480.1
Gorai.001G201600	7	4	2	1	15	0	Pentatricopeptide repeat (PPR) superfamily protein	PF01535	PTHR24015					AT2G13600.1
Gorai.001G201700	4	4	16	8	47	2	transcription regulators	PF09174	PTHR22504	KOG3104				AT5G13240.1
Gorai.001G201800	48	48	5	5	90	90	Ribulose bisphosphate carboxylase (small chain) family protein	PF00101,PF12338			4.1.1.39	K01602	GO:0016984,GO:0015977	AT5G38430.1
Gorai.001G201900	1	1	3	2	30	36								AT5G16110.1
Gorai.001G202000	1	1	23	3	13	2		PF01565,PF02873	PTHR21071				GO:0008762,GO:0016491,GO:0050660,GO:0055114
Gorai.001G202100	5	14	2	2	7	7	Dihydrodipicolinate reductase, bacterial/plant	PF01113,PF05173	PTHR20836		1.3.1.26	K00215	GO:0008839,GO:0009089,GO:0055114,GO:0070402	AT3G59890.1
Gorai.001G202200	5	58	1	17	1	1								AT1G67035.2
Gorai.001G202300	3	2	2	23	16	1	Peptidyl-tRNA hydrolase family protein	PF01195	PTHR17224	KOG2255			GO:0004045,GO:0006412	AT5G38290.2
Gorai.001G202500	1	1	19	2	36	24	alpha/beta-Hydrolases superfamily protein	PF03959	PTHR12277:SF8,PTHR12277	KOG1552				AT5G38220.1
Gorai.001G202600	19	66	36	46	0	0	Bifunctional inhibitor/lipid-transfer protein/seed storage 2S albumin superfamily protein	PF00234						AT3G18280.1
Gorai.001G202700	24	2	3	1	0	1	HEAT repeat-containing protein	PF02985		KOG0211			GO:0005515	AT5G16210.1
Gorai.001G202800	17	5	1	1	72	1	Plant protein of unknown function (DUF827)	PF05701						AT1G66840.1
Gorai.001G202900	9	9	8	8	47	47	Ribonuclease H-like superfamily protein							AT2G02650.1
Gorai.001G203000	2	1	14	1	1	6
Gorai.001G203100	none	47	none	33	none	1
Gorai.001G203200	4	1	4	1	16	6	RING/FYVE/PHD zinc finger superfamily protein	PF00097,PF12428	PTHR23012					AT2G01275.1
Gorai.001G203300	4	4	3	3	2	2	glutamine synthase clone R1	PF03951,PF00120	PTHR20852:SF14,PTHR20852	KOG0683	6.3.1.2	K01915	GO:0004356,GO:0006807,GO:0006542	AT5G37600.1
Gorai.001G203400	0	23	24	12	4	45	receptor like protein 7	PF00560,PF08263	PTHR24420,PTHR24420:SF473	KOG0472			GO:0005515	AT1G47890.1
Gorai.001G203500	19	none	12	none	6	none
Gorai.001G203600	12	1	2	3	7	106		PF03661					GO:0016021	AT3G02420.1
Gorai.001G203700	4	7	8	1	9	16	cell division protein ftsH, putative	PF06480,PF00004	PTHR23076:SF35,PTHR23076				GO:0005524,GO:0004222,GO:0008270,GO:0016021	AT3G02450.1
Gorai.001G203800	41	19	15	15	1	0	Methylenetetrahydrofolate reductase family protein	PF01619	PTHR13914	KOG0186	1.5.99.8	K00318	GO:0004657,GO:0006537,GO:0006562,GO:0055114	AT5G38710.1
Gorai.001G203900	2	5	5	5	3	3	receptor-like kinase 1	PF00069,PF00560,PF08263	PTHR24420,PTHR24420:SF537	KOG1187			GO:0004672,GO:0005524,GO:0006468,GO:0005515	AT1G48480.1
Gorai.001G204100	2	5	11	48	1	1
Gorai.001G204200	15	15	0	0	38	38	Protein of unknown function, transmembrane-40	PF10160	PTHR15876,PTHR15876:SF9					AT3G05010.1
Gorai.001G204300	5	5	1	2	39	1	NADH-ubiquinone dehydrogenase, mitochondrial, putative	PF09326,PF00111,PF00384,PF10588	PTHR11615:SF10,PTHR11615	KOG2282	1.6.5.3,1.6.99.3	K03934	GO:0009055,GO:0051536,GO:0016491,GO:0055114,GO:0016651	AT5G37510.1
Gorai.001G204400	16	2	4	5	17	1	microsomal glutathione s-transferase, putative	PF01124	PTHR10250,PTHR10250:SF1					AT1G65820.1
Gorai.001G204500	10	10	2	0	26	26	auxin response factor 8	PF02309,PF06507,PF02362					GO:0006355,GO:0005634,GO:0003677,GO:0009725	AT5G37020.1
Gorai.001G204600	2	2	1	2	1	1		PF09184	PTHR16487					AT5G17070.1
Gorai.001G204700	5	5	5	5	1	3	eukaryotic release factor 1-3	PF03463,PF03465,PF03464	PTHR10113	KOG0688		K03265	GO:0016149,GO:0006415,GO:0005737	AT3G26618.1
Gorai.001G204800	2	2	7	2	1	1	alpha/beta-Hydrolases superfamily protein	PF03893,PF01764	PTHR21493,PTHR21493:SF1	KOG2088			GO:0004806,GO:0006629,GO:0004091,GO:0016042	AT5G37710.1
Gorai.001G204900	2	2	1	1	1	1	O-Glycosyl hydrolases family 17 protein	PF00332,PF07983	PTHR16631:SF1,PTHR16631				GO:0004553,GO:0005975	AT1G66250.1
Gorai.001G205000	6	6	37	37	91	91	Cyclin/Brf1-like TBP-binding protein							AT2G45100.1
Gorai.001G205100	2	10	2	1	26	1								AT5G16610.2
Gorai.001G205300	1	1	9	9	25	25	myb domain protein 43	PF00249	PTHR10641	KOG0048		K09422	GO:0003677	AT5G16600.1
Gorai.001G205400	13	13	1	1	18	18	nucleic acid binding;methyltransferases	PF10237	PTHR13200					AT3G58470.1
Gorai.001G205500	16	1	1	4	17	8	glutamine dumper 4							AT2G24762.1
Gorai.001G205600	4	13	13	5	24	70	6-phosphogluconate dehydrogenase family protein	PF00393,PF03446	PTHR11811	KOG2653	1.1.1.44	K00033	GO:0004616,GO:0050661,GO:0006098,GO:0055114	AT3G02360.1
Gorai.001G205700	12	0	1	2	7	62	galacturonosyltransferase 9	PF01501	PTHR13778:SF3,PTHR13778		2.4.1.43	K13648	GO:0016757	AT3G02350.1
Gorai.001G205800	0	7	17	15	0	12	basic leucine-zipper 42	PF00170	PTHR22952:SF66,PTHR22952				GO:0003700,GO:0043565,GO:0046983,GO:0006355	AT3G30530.1
Gorai.001G205900	none	19	none	28	none	6	phosphate transporter 1;4	PF00083	PTHR24064:SF16,PTHR24064	KOG0252			GO:0022857,GO:0055085,GO:0016021	AT2G38940.1
Gorai.001G206000	1	1	3	3	2	5	Transmembrane amino acid transporter family protein	PF01490	PTHR22950	KOG1305				AT3G30390.1
Gorai.001G206100	39	none	37	none	0	none	Pectin lyase-like superfamily protein	PF00295					GO:0004650,GO:0005975	AT3G07970.1
Gorai.001G206200	10	7	2	0	15	31	SMAD/FHA domain-containing protein	PF00498	PTHR23308:SF2,PTHR23308	KOG1881			GO:0005515	AT5G38840.1
Gorai.001G206300	2	4	7	1	1	16	O-fucosyltransferase family protein	PF10250						AT5G15740.1
Gorai.001G206400	25	none	16	none	29	none	ribulose-bisphosphate carboxylases	PF02788,PF00016	PTHR23321:SF19,PTHR23321		4.1.1.39	K01601	GO:0000287,GO:0016984,GO:0015977,GO:0009536	ATCG00490.1
Gorai.001G206500	10	4	43	43	11	11	auxin transport protein (BIG)	PF00569	PTHR21725	KOG1776	6.3.2.19	K10691	GO:0008270	AT3G02260.1
Gorai.001G206600	3	9	4	39	139	19	Homeodomain-like superfamily protein	PF00249					GO:0003677	AT2G03500.1
Gorai.001G206700	3	3	1	20	4	22	Pollen Ole e 1 allergen and extensin family protein	PF01190						AT5G15780.1
Gorai.001G206900	5	2	10	10	1	3	Pollen Ole e 1 allergen and extensin family protein	PF01190						AT5G15780.1
Gorai.001G207000	13	2	1	1	1	1								AT5G38880.1
Gorai.001G207100	12	5	4	1	10	10	RING/U-box superfamily protein	PF00097	PTHR22766,PTHR22766:SF20					AT5G38895.3
Gorai.001G207200	4	1	6	6	5	5	Thioredoxin superfamily protein	PF01323					GO:0015035,GO:0030288	AT5G38900.1
Gorai.001G207300	7	4	3	3	2	34	K-box region and MADS-box transcription factor family protein	PF01486,PF00319	PTHR11945:SF19,PTHR11945	KOG0014		K09264	GO:0003677,GO:0046983,GO:0003700,GO:0006355,GO:0005634,GO:0043565	AT3G02310.1
Gorai.001G207400	2	3	1	1	1	3								AT5G15802.1
Gorai.001G207700	2	2	5	35	3	0	N2,N2-dimethylguanosine tRNA methyltransferase	PF02005	PTHR10631	KOG1253	2.1.1.32	K00555	GO:0003723,GO:0004809,GO:0008033	AT5G15810.1
Gorai.001G207800	15	11	9	8	0	100
Gorai.001G207900	7	4	32	8	0	30	Malectin/receptor-like protein kinase family protein	PF11721,PF07714	PTHR24420:SF418,PTHR24420	KOG1187			GO:0004672,GO:0005524,GO:0006468	AT3G51550.1
Gorai.001G208100	1	1	14	14	119	20	root hair specific 13	PF01190						AT4G02270.1
Gorai.001G208200	8	8	55	1	4	4	brassinosteroid-6-oxidase 2	PF00067	PTHR24286,PTHR24286:SF21	KOG0157	1.14.-.-	K12640	GO:0005506,GO:0009055,GO:0016705,GO:0020037,GO:0055114	AT3G30180.1
Gorai.001G208300	2	2	2	39	28	88	COBRA-like protein 1 precursor	PF04833						AT3G02210.1
Gorai.001G208400	1	27	31	11	141	0	S-adenosyl-L-methionine-dependent methyltransferases superfamily protein	PF03141	PTHR10108,PTHR10108:SF434				GO:0008168	AT4G01240.1
Gorai.001G208500	18	9	1	7	33	1		PF10217	PTHR22876,PTHR22876:SF1	KOG3241				AT3G02220.1
Gorai.001G208600	2	15	1	23	3	24	Malectin/receptor-like protein kinase family protein	PF00069	PTHR24420:SF418,PTHR24420	KOG1187			GO:0004672,GO:0005524,GO:0006468	AT3G51550.1
Gorai.001G208700	1	4	15	3	6	2	cytochrome P450, family 714, subfamily A, polypeptide 1	PF00067	PTHR24282:SF174,PTHR24282	KOG0157			GO:0005506,GO:0009055,GO:0016705,GO:0020037,GO:0055114	AT5G24910.1
Gorai.001G208800	2	none	22	none	1	none
Gorai.001G208900	1	1	5	3	48	2	Malectin/receptor-like protein kinase family protein	PF11721						AT3G51550.1
Gorai.001G209000	1	1	11	11	0	0
Gorai.001G209100	32	9	9	37	25	132
Gorai.001G209200	3	5	9	5	31	3	Malectin/receptor-like protein kinase family protein	PF11721,PF07714	PTHR24420:SF418,PTHR24420	KOG1187			GO:0004672,GO:0005524,GO:0006468	AT3G51550.1
Gorai.001G209300	25	53	16	16	29	0	Photosystem I, PsaA/PsaB protein	PF00223					GO:0015979,GO:0009522,GO:0009579,GO:0016021	ATCG00340.1
Gorai.001G209400	0	40	24	12	12	0
Gorai.001G209500	1	11	1	4	6	14
Gorai.001G209600	45	38	45	46	0	0								AT5G05800.1
Gorai.001G209700	6	6	1	1	18	18	fumarylacetoacetase, putative	PF01557	PTHR11820:SF1,PTHR11820				GO:0003824,GO:0008152,GO:0009072,GO:0004334	AT1G12050.1
Gorai.001G209800	2	54	0	0	1	0	RNA polymerase I subunit 43	PF01193,PF01000	PTHR11800:SF13,PTHR11800	KOG1521			GO:0003899,GO:0046983,GO:0006351	AT1G60620.1
Gorai.001G209900	10	10	1	1	57	57	acclimation of photosynthesis to environment							AT5G38660.2
Gorai.001G210000	0	0	0	0	41	41	Homeodomain-like superfamily protein							AT1G49560.1
Gorai.001G210100	12	0	1	1	7	0	Malectin/receptor-like protein kinase family protein	PF11721,PF00069	PTHR24420:SF418,PTHR24420	KOG1187			GO:0004672,GO:0005524,GO:0006468	AT3G51550.1
Gorai.001G210200	6	6	48	48	127	127	plant intracellular ras group-related LRR 4							AT4G35470.1
Gorai.001G210300	16	1	1	9	55	0	Malectin/receptor-like protein kinase family protein	PF11721,PF00069	PTHR24420:SF418,PTHR24420	KOG1187			GO:0004672,GO:0005524,GO:0006468	AT3G51550.1
Gorai.001G210400	16	1	20	35	4	0
Gorai.001G210500	1	1	4	14	10	20
Gorai.001G210600	15	none	28	none	3	none								AT1G27435.1
Gorai.001G210700	16	13	1	1	7	43	Malectin/receptor-like protein kinase family protein	PF11721,PF07714	PTHR24420:SF418,PTHR24420	KOG1187			GO:0004672,GO:0005524,GO:0006468	AT3G51550.1
Gorai.001G210800	0	13	1	1	0	18	ER lumen protein retaining receptor family protein	PF00810	PTHR10585,PTHR10585:SF10				GO:0046923,GO:0006621,GO:0016021	AT2G21190.1
Gorai.001G210900	6	55	1	1	4	6
Gorai.001G211000	1	1	6	1	5	6								AT1G06660.1
Gorai.001G211100	14	14	8	9	68	48	Pleckstrin homology (PH) domain-containing protein	PF00169					GO:0005515,GO:0005543	AT2G30880.1
Gorai.001G211300	71	70	24	5	3	3	GDSL-like Lipase/Acylhydrolase superfamily protein	PF00657	PTHR22835,PTHR22835:SF39				GO:0016788,GO:0006629	AT2G42990.1
Gorai.001G211400	5	5	7	5	33	3	Ribosomal protein L18ae/LX family protein	PF01775	PTHR10052	KOG0829		K02882	GO:0003735,GO:0006412,GO:0005840	AT2G34480.1
Gorai.001G211500	14	14	7	1	0	107	vacuoleless1 (VCL1)	PF04840,PF04841	PTHR12811	KOG2280			GO:0006886,GO:0005737	AT2G38020.1
Gorai.001G211700	4	4	8	30	30	88	Cytochrome b561/ferric reductase transmembrane protein family	PF03188	PTHR23130,PTHR23130:SF18				GO:0016021	AT4G18260.1
Gorai.001G211800	0	6	24	24	6	1
Gorai.001G211900	5	12	30	44	3	1	Malectin/receptor-like protein kinase family protein	PF11721,PF07714	PTHR24420:SF418,PTHR24420	KOG1187			GO:0004672,GO:0005524,GO:0006468	AT3G51550.1
Gorai.001G212000	6	6	9	9	48	48	Mitochondrial substrate carrier family protein	PF00153	PTHR24089,PTHR24089:SF87					AT3G51870.1
Gorai.001G212200	43	53	51	48	4	6
Gorai.001G212400	2	2	5	2	3	1	Transducin/WD40 repeat-like superfamily protein	PF00400,PF08149	PTHR14085	KOG1272			GO:0005515	AT3G10530.1
Gorai.001G212500	1	1	2	3	13	2	2-oxoglutarate (2OG) and Fe(II)-dependent oxygenase superfamily protein	PF03171	PTHR10209,PTHR10209:SF55	KOG0143			GO:0016491,GO:0016706,GO:0055114	AT1G14130.1
Gorai.001G212600	2	4	0	6	0	9	Topoisomerase II-associated protein PAT1		PTHR21551					AT3G22270.1
Gorai.001G212700	1	14	25	39	77	0	RING/U-box superfamily protein	PF00097	PTHR22764					AT5G41450.1
Gorai.001G212800	12	18	2	18	7	92	Cysteine proteinases superfamily protein	PF02338	PTHR12419					AT3G22260.1
Gorai.001G212900	1	1	14	6	108	5	UDP-Glycosyltransferase superfamily protein	PF00201	PTHR11926,PTHR11926:SF15	KOG1192			GO:0016758,GO:0008152	AT3G22250.1
Gorai.001G213000	38	none	27	none	0	none	photosystem II reaction center protein A	PF00124					GO:0045156,GO:0009772,GO:0019684,GO:0030077	ATCG00020.1
Gorai.001G213100	none	25	none	38	none	91	ribosomal protein L2	PF03947	PTHR13691,PTHR13691:SF5				GO:0003735,GO:0006412,GO:0005622,GO:0005840,GO:0016740,GO:0015934,GO:0003723	ATCG00830.1
Gorai.001G213200	6	6	1	1	18	18	Ribosomal L29e protein family	PF01779	PTHR12884	KOG3504		K02905	GO:0003735,GO:0006412,GO:0005622,GO:0005840	AT3G06680.1
Gorai.001G213300	none	40	none	13	none	118								AT2G32210.1
Gorai.001G213400	5	5	17	17	42	1	Ribosomal L27e protein family	PF01777,PF00467	PTHR10497	KOG3418			GO:0003735,GO:0006412,GO:0005622,GO:0005840	AT4G15000.1
Gorai.001G213700	7	10	1	16	4	11	FAR1-related sequence 2	PF03101,PF04434,PF10551					GO:0003677,GO:0004803,GO:0006313,GO:0008270	AT2G32250.2
Gorai.001G213800	7	4	0	19	34	2	cytochrome P450, family 97, subfamily B, polypeptide 3	PF00067	PTHR25943:SF143,PTHR25943	KOG0157			GO:0005506,GO:0009055,GO:0016705,GO:0020037,GO:0055114	AT4G15110.1
Gorai.001G213900	5	13	2	2	0	50	phosphorylcholine cytidylyltransferase	PF01467	PTHR10739,PTHR10739:SF13	KOG2804			GO:0016779,GO:0009058	AT2G32260.1
Gorai.001G214000	29	9	9	9	0	78	UDP-glucosyl transferase 71B6	PF00201	PTHR11926,PTHR11926:SF15	KOG1192			GO:0016758,GO:0008152	AT3G21780.1
Gorai.001G214100	2	2	7	7	40	40	transferases;sulfuric ester hydrolases;catalytics;transferases							AT3G01380.1
Gorai.001G214200	6	6	9	9	0	0	ACT-like protein tyrosine kinase family protein							AT4G38470.1
Gorai.001G214300	27	3	2	3	15	27	UDP-glucosyl transferase 71B6	PF00201	PTHR11926,PTHR11926:SF15	KOG1192			GO:0016758,GO:0008152	AT3G21780.1
Gorai.001G214400	10	10	1	1	57	57
Gorai.001G214500	1	8	2	1	24	1	Carbohydrate-binding X8 domain superfamily protein	PF07983	PTHR16631					AT1G79480.1
Gorai.001G214600	10	2	5	8	26	32	Coproporphyrinogen III oxidase	PF01218	PTHR10755	KOG1518			GO:0004109,GO:0006779,GO:0055114	AT1G03475.1
Gorai.001G214700	2	2	1	1	1	1	Pentatricopeptide repeat (PPR) superfamily protein	PF01535	PTHR24015:SF62,PTHR24015					AT4G14850.1
Gorai.001G214800	5	2	1	1	1	1	WRKY family transcription factor	PF03106					GO:0003700,GO:0043565,GO:0006355	AT1G62300.1
Gorai.001G214900	2	2	1	0	26	11						K10891		AT4G14970.1
Gorai.001G215000	8	11	1	1	4	1	Cell differentiation, Rcd1-like protein	PF04078	PTHR12262	KOG3036				AT3G20800.1
Gorai.001G215100	3	65	11	33	19	0	Cell differentiation, Rcd1-like protein	PF04078	PTHR12262					AT3G20800.1
Gorai.001G215200	none	3	none	11	none	19	Cell differentiation, Rcd1-like protein	PF04078	PTHR12262	KOG3036				AT3G20800.1
Gorai.001G215300	3	3	11	11	19	19	Cell differentiation, Rcd1-like protein	PF04078	PTHR12262	KOG3036				AT3G20800.1
Gorai.001G215400	3	3	11	11	19	19	Cell differentiation, Rcd1-like protein	PF04078	PTHR12262	KOG3036				AT3G20800.1
Gorai.001G215500	2	2	18	1	53	1	ERD (early-responsive to dehydration stress) family protein	PF02714	PTHR13018:SF5,PTHR13018	KOG1134			GO:0016020	AT3G21620.1
Gorai.001G215600	31	1	1	41	1	5	Ubiquitin fusion degradation UFD1 family protein	PF03152	PTHR12555,PTHR12555:SF10	KOG1816			GO:0006511	AT4G15420.1
Gorai.001G215700	9	4	19	3	2	2	RNAse II-like 1	PF00636,PF00035	PTHR14950				GO:0003725,GO:0005622,GO:0003723,GO:0004525,GO:0006396	AT4G15417.1
Gorai.001G215800	8	3	13	1	4	38	CLAVATA3/ESR-RELATED 20							AT1G05065.1
Gorai.001G215900	none	3	none	13	none	76
Gorai.001G216000	10	4	8	1	73	16
Gorai.001G216100	4	2	6	1	34	62	Pentatricopeptide repeat (PPR) superfamily protein	PF01535	PTHR24015:SF152,PTHR24015					AT4G32430.1
Gorai.001G216200	2	2	2	7	4	3	Lycopene beta/epsilon cyclase protein	PF05834	PTHR13847:SF34,PTHR13847			K14606	GO:0016705,GO:0016117	AT2G32640.1
Gorai.001G216300	9	18	2	1	21	21	RmlC-like cupins superfamily protein	PF05899						AT2G32650.1
Gorai.001G216400	1	1	4	1	8	6	Protein phosphatase 2A regulatory B subunit family protein	PF01603	PTHR10257	KOG2085		K11584	GO:0008601,GO:0007165,GO:0000159	AT3G21650.1
Gorai.001G216500	12	12	2	2	7	2	PHD finger family protein / bromo-adjacent homology (BAH) domain-containing protein	PF00628,PF01426	PTHR12505:SF8,PTHR12505				GO:0005515,GO:0003677	AT4G22140.2
Gorai.001G216600	1	1	1	1	6	6	Nodulin MtN21 /EamA-like transporter family protein	PF00892	PTHR22911:SF6,PTHR22911	KOG4510			GO:0016020	AT2G05755.1
Gorai.001G216700	1	5	2	2	7	7								AT2G32980.1
Gorai.001G216800	5	11	17	17	1	1	small ubiquitin-like modifier 2	PF11976	PTHR10562	KOG1769		K12160	GO:0005515	AT5G55160.2
Gorai.001G216900	7	7	1	35	4	28	O-Glycosyl hydrolases family 17 protein	PF00332,PF07983	PTHR16631				GO:0004553,GO:0005975	AT2G05790.1
Gorai.001G217000	4	2	15	1	0	1	ARM repeat superfamily protein	PF00514	PTHR23315				GO:0005515	AT2G05810.1
Gorai.001G217100	6	6	9	9	0	0	D-aminoacid aminotransferase-like PLP-dependent enzymes superfamily protein	PF01063	PTHR11825,PTHR11825:SF13				GO:0003824,GO:0008152	AT5G27410.2
[truncated: 31,688 more rows]
