# Supplementary material for: Domestication over Speciation in Allopolyploid Cotton Species: A Stronger Transcriptomic Pull
Source: Genes (Basel). 2023 Jun 20;14(6):1301. doi: 10.3390/genes14061301 (PMC10298526; doi:10.3390/genes14061301)
Supplement: Supplementary file 1 [file genes-14-01301-s001.zip › Supplementary Table S9.xlsx]

## Sheet: Sheet1
Supplemental Table S9. Module number, size, and functional annotation for modules from each species-specific network (G. hirsutum, AD1; G. barbadense, AD2) with significance under domestication, domestication + development, or development. Modules signficiant for the combined term domestication_development are noted in column four, and modules with particular relevance to fiber development are no…
	Module	Gene Number	Functional Annotation	domestication_development	Relevant to fiber?
AD1 domestication	12	1335	BP: translational initiation; autophagy; vacuole organization; MF: fatty acid binding; nucleoside binding	yes	Yes, and others
	13	1334	none	yes
	15	882	none	yes
	17	662	none	yes
	20	531	none	yes
	21	470	BP: aminoglycan metabolic process MF: chitinase/oxidoreductase activity	no	Yes, and others
	24	355	BP: Ras protein signal transduction; regulation of cell communication; MF: binding	no
	29	236	none	no
	34	204	BP: DNA-templated transcription, RNA/other metabolic process; MF: transcription regulator activity	no	Yes, and others
	41	150	none	yes
	48	131	BP: ribose phosphate metabolic process; possibly photosynthesis: MF: fructose-bisphosphate activity; aldehyde-lyase activity	yes	Yes, and others
	63	75	none	no
AD1 domestication and development	2	9106	BP: lipid metabolism; protein modification; carboxylic acid biosynthesis; MF: cytoskeletal motor activity	yes	Yes
	4	5063	BP: regulation of transcription/biosynthetic process; MF: nucleic acid/DNA/protein binding	yes
	5	4639	BP: nitrogen compound metabolic process; MF: nucleoside binding; protein transmembrane transporter activity	yes
	6	2814	BP: tRNA/ncRNA metabolic process; translation; MF: nucleotide/nucleoside binding	yes
	7	2213	BP: protein modification and/or transcription-related; MF: nucleic acid binding/protein kinase activity	yes
	11	1584	none	yes
	16	818	BP: gas exchange	yes
	32	225	BP: copper ion binding	yes	Yes, and others
	33	214	BP: cellular localization; peptide transport	yes
	50	127	none	yes
	51	120	BP/MF: copper ion transmembrane transport	yes	Yes, and others
AD1 development	1	10048	BP: protein glycosylation; transport; glycoprotein or carbohydrate metabolic process MF: acetylglucosaminyltransferase/glycosyltransferase/hexosyltransferase activity	yes
	3	5096	BP: regulation of transcription; microtubule-based process/movement MF: nucleic acid binding; cytoskeletal/microtubule motor activity	yes
	8	1900	BP: protein phosphorylation/modification MF: fatty acid synthase activity; polygalacturonase/protein kinase activity	yes
	9	1707	BP: regulation of biological/metabolic process MF: oxidoreductase activity	yes
	10	1604	BP: DNA/nitrogren compound/primary metabolic process MF: nucleic acid/protein binding; helicase/nuclease activity	no
	14	1157	BP: cellular localization; various metabolic processes (pyruvate/citrate/xenobiotic/polysaccharide) MF: lipid binding;oxidoreductase activity	yes
	27	279	none	yes
	36	168	none	yes
	49	128	none	yes
	56	91	none	yes
	72	54	none	yes
	75	36	none	yes
AD1 combined term only	70	56	BP: none MF: magnesium ion binding; terpene synthesis or carbon-oxygen lyase activity	yes
	73	43	none	yes
	Module	Gene Number	Functional Annotation	domestication_development	Relevant to fiber?
AD2 domesti- cation	29	426	none	no
	35	331	none	yes
	56	89	none	no
AD2 domestication and development	1	10148	BP: DNA metabolic process; cellular localization; MF: purine ribonucleos(t)ide binding; catalytic activity, possibly hydrolase	yes
	3	4495	BP: polysaccharide/carbohydrate metabolic process and/or regulation of thereof	yes	Yes
	4	4411	MF: actin binding; cytoskeletal protein binding	yes	Yes
	6	2683	MF: cyclic compound binding	yes
	20	828	BP: DNA metabolic process; microtubule-based movement or process; MF: nucleic acid binding; cytoskeletal/microtubule motor activity	yes	Yes
	40	293	none	yes
	41	285	none	yes
	49	195	none	yes
	53	146	BP: macromolecule localization/peptide transport	yes	Yes
AD2 development	5	3851	BP: carboxylic acid/small molecular metabolic process; organic substance biosynthesis process MF: lyase and transferase activity	yes
	10	1737	BP: translation; amide metabolic process; organonitrogen compound biosynthetic process MF: structural constituent of ribosome; structural molecule activity	yes
	19	865	none	yes
	55	107	none	yes
AD2 combined term only	17	937	BP: gene expression; biosynthetic process; metabolic process MF: threonine-type peptidase activity; oxidoreductase activity	yes
	22	638	none	yes
	25	547	BP: none MF: pectinerase activity	yes
	39	295	none	yes
	43	242	BP: gene expression; biosynthetic process; metabolic process MF: nucleic acid binding; histone acetyltransferase activity	yes
