# Supplementary material for: Domestication over Speciation in Allopolyploid Cotton Species: A Stronger Transcriptomic Pull
Source: Genes (Basel). 2023 Jun 20;14(6):1301. doi: 10.3390/genes14061301 (PMC10298526; doi:10.3390/genes14061301)
Supplement: Supplementary file 1 [file genes-14-01301-s001.zip › Supplementary Table S10.xlsx]

## Sheet: s6.topGO_ad1.enrichment
Supplementary Table S10. TopGO enrichment for modules in G. hirsutum (AD1) and G. barbadense (AD2). A Benjamini-Hochberg adjusted q-value is given for each significant term (q.adj < 0.05). The GO term category is given under ontology and follows conventional naming. The module is given under ME.
GO.ID	Term	Annotated	Significant	Expected	result1	qval.bh	ontology	ME	Species
GO:0016757	transferase activity, transferring glyco...	462	116	70.6	1.7e-08	1.0744e-05	MF	1	G. hirsutum
GO:0016758	transferase activity, transferring hexos...	359	85	54.86	1.6e-05	0.005056	MF	1	G. hirsutum
GO:0016881	acid-amino acid ligase activity	113	34	17.27	4.9e-05	0.0103227	MF	1	G. hirsutum
GO:0008194	UDP-glycosyltransferase activity	121	35	18.49	9.3e-05	0.01264	MF	1	G. hirsutum
GO:0008375	acetylglucosaminyltransferase activity	47	18	7.18	0.0001	0.01264	MF	1	G. hirsutum
GO:0070085	glycosylation	71	25	10.87	2.7e-05	0.0148	BP	1	G. hirsutum
GO:0050794	regulation of cellular process	1818	335	278.31	4.5e-05	0.0148	BP	1	G. hirsutum
GO:0007165	signal transduction	445	98	68.12	8.1e-05	0.0148	BP	1	G. hirsutum
GO:0023052	signaling	445	98	68.12	8.1e-05	0.0148	BP	1	G. hirsutum
GO:0050789	regulation of biological process	1840	336	281.68	9.3e-05	0.0148	BP	1	G. hirsutum
GO:0006810	transport	1449	271	221.82	0.0001	0.0148	BP	1	G. hirsutum
GO:0051234	establishment of localization	1456	271	222.89	0.00014	0.01776	BP	1	G. hirsutum
GO:0051179	localization	1472	272	225.34	0.00023	0.01776	BP	1	G. hirsutum
GO:0006486	protein glycosylation	58	20	8.88	0.00024	0.01776	BP	1	G. hirsutum
GO:0009100	glycoprotein metabolic process	58	20	8.88	0.00024	0.01776	BP	1	G. hirsutum
GO:0009101	glycoprotein biosynthetic process	58	20	8.88	0.00024	0.01776	BP	1	G. hirsutum
GO:0043413	macromolecule glycosylation	58	20	8.88	0.00024	0.01776	BP	1	G. hirsutum
GO:0065007	biological regulation	1947	348	298.06	0.00038	0.0259569	BP	1	G. hirsutum
GO:0044262	cellular carbohydrate metabolic process	250	58	38.27	0.00059	0.0374229	BP	1	G. hirsutum
GO:0007154	cell communication	527	108	80.68	0.00066	0.039072	BP	1	G. hirsutum
GO:0016020	membrane	2347	456	377.87	1.2e-09	2.796e-07	CC	1	G. hirsutum
GO:0031224	intrinsic component of membrane	932	189	150.05	0.0001	0.01165	CC	1	G. hirsutum
GO:0016021	integral component of membrane	915	185	147.32	0.00015	0.01165	CC	1	G. hirsutum
GO:0003824	catalytic activity	8517	1416	1272.15	4.9e-11	3.0968e-08	MF	2	G. hirsutum
GO:0035639	purine ribonucleoside triphosphate bindi...	2793	525	417.18	4.3e-10	1.3588e-07	MF	2	G. hirsutum
GO:0005524	ATP binding	2457	460	366.99	1.3e-08	2.73867e-06	MF	2	G. hirsutum
GO:0016787	hydrolase activity	2543	473	379.84	1.9e-08	2.79133e-06	MF	2	G. hirsutum
GO:0008144	drug binding	2579	477	385.21	3.5e-08	2.79133e-06	MF	2	G. hirsutum
GO:0017111	nucleoside-triphosphatase activity	798	175	119.19	4.1e-08	2.79133e-06	MF	2	G. hirsutum
GO:0036094	small molecule binding	3543	631	529.2	4.7e-08	2.79133e-06	MF	2	G. hirsutum
GO:0000166	nucleotide binding	3380	605	504.86	4.8e-08	2.79133e-06	MF	2	G. hirsutum
GO:1901265	nucleoside phosphate binding	3380	605	504.86	4.8e-08	2.79133e-06	MF	2	G. hirsutum
GO:0017076	purine nucleotide binding	3063	554	457.51	5.2e-08	2.79133e-06	MF	2	G. hirsutum
GO:0097367	carbohydrate derivative binding	3088	558	461.24	5.2e-08	2.79133e-06	MF	2	G. hirsutum
GO:0032555	purine ribonucleotide binding	3051	552	455.72	5.3e-08	2.79133e-06	MF	2	G. hirsutum
GO:0032553	ribonucleotide binding	3072	555	458.85	5.9e-08	2.86831e-06	MF	2	G. hirsutum
GO:0016818	hydrolase activity, acting on acid anhyd...	838	181	125.17	7.3e-08	3.29543e-06	MF	2	G. hirsutum
GO:0016817	hydrolase activity, acting on acid anhyd...	840	181	125.47	8.8e-08	3.70773e-06	MF	2	G. hirsutum
GO:0043168	anion binding	3484	619	520.39	9.9e-08	3.9105e-06	MF	2	G. hirsutum
GO:0016462	pyrophosphatase activity	819	176	122.33	1.6e-07	5.94824e-06	MF	2	G. hirsutum
GO:0032559	adenyl ribonucleotide binding	2715	487	405.53	1.3e-06	4.56444e-05	MF	2	G. hirsutum
GO:0030554	adenyl nucleotide binding	2721	487	406.42	1.7e-06	5.65474e-05	MF	2	G. hirsutum
GO:0016740	transferase activity	3119	549	465.87	2.5e-06	7.9e-05	MF	2	G. hirsutum
GO:0043167	ion binding	5067	843	756.84	2.3e-05	0.00069219	MF	2	G. hirsutum
GO:0016887	ATPase activity	396	88	59.15	6e-05	0.00172364	MF	2	G. hirsutum
GO:0140097	catalytic activity, acting on DNA	139	38	20.76	0.00011	0.00302261	MF	2	G. hirsutum
GO:0042623	ATPase activity, coupled	252	58	37.64	0.0004	0.0105333	MF	2	G. hirsutum
GO:0004842	ubiquitin-protein transferase activity	89	25	13.29	0.00101	0.0239257	MF	2	G. hirsutum
GO:0019787	ubiquitin-like protein transferase activ...	89	25	13.29	0.00101	0.0239257	MF	2	G. hirsutum
GO:0008026	ATP-dependent helicase activity	134	34	20.02	0.00106	0.0239257	MF	2	G. hirsutum
GO:0070035	purine NTP-dependent helicase activity	134	34	20.02	0.00106	0.0239257	MF	2	G. hirsutum
GO:0140096	catalytic activity, acting on a protein	2169	372	323.97	0.00118	0.0257159	MF	2	G. hirsutum
GO:0004386	helicase activity	241	53	36	0.00206	0.0433973	MF	2	G. hirsutum
GO:0008408	3'-5' exonuclease activity	14	7	2.09	0.00214	0.0436284	MF	2	G. hirsutum
GO:0008168	methyltransferase activity	271	58	40.48	0.00253	0.0487012	MF	2	G. hirsutum
GO:0003774	motor activity	120	30	17.92	0.00258	0.0487012	MF	2	G. hirsutum
GO:0016772	transferase activity, transferring phosp...	1865	320	278.57	0.00262	0.0487012	MF	2	G. hirsutum
GO:0006629	lipid metabolic process	637	138	94.44	1.3e-06	0.0011544	BP	2	G. hirsutum
GO:0043412	macromolecule modification	1776	325	263.32	6.9e-06	0.0030636	BP	2	G. hirsutum
GO:0006464	cellular protein modification process	1720	313	255.02	1.7e-05	0.0033744	BP	2	G. hirsutum
GO:0036211	protein modification process	1720	313	255.02	1.7e-05	0.0033744	BP	2	G. hirsutum
GO:0044283	small molecule biosynthetic process	302	72	44.78	1.9e-05	0.0033744	BP	2	G. hirsutum
GO:0008610	lipid biosynthetic process	311	72	46.11	5.2e-05	0.006771	BP	2	G. hirsutum
GO:0046394	carboxylic acid biosynthetic process	258	62	38.25	5.4e-05	0.006771	BP	2	G. hirsutum
GO:0016053	organic acid biosynthetic process	259	62	38.4	6.1e-05	0.006771	BP	2	G. hirsutum
GO:0044255	cellular lipid metabolic process	284	66	42.11	9.4e-05	0.00927467	BP	2	G. hirsutum
GO:0019752	carboxylic acid metabolic process	466	98	69.09	0.00015	0.0121091	BP	2	G. hirsutum
GO:0043436	oxoacid metabolic process	466	98	69.09	0.00015	0.0121091	BP	2	G. hirsutum
GO:0006082	organic acid metabolic process	468	98	69.39	0.00017	0.01258	BP	2	G. hirsutum
GO:0006259	DNA metabolic process	270	62	40.03	0.00022	0.0150277	BP	2	G. hirsutum
GO:0071704	organic substance metabolic process	6565	1037	973.36	0.00037	0.0215657	BP	2	G. hirsutum
GO:0016567	protein ubiquitination	85	25	12.6	0.00042	0.0215657	BP	2	G. hirsutum
GO:0006281	DNA repair	175	43	25.95	0.00044	0.0215657	BP	2	G. hirsutum
GO:0006974	cellular response to DNA damage stimulus	176	43	26.09	0.0005	0.0215657	BP	2	G. hirsutum
GO:0033554	cellular response to stress	176	43	26.09	0.0005	0.0215657	BP	2	G. hirsutum
GO:0008652	cellular amino acid biosynthetic process	110	30	16.31	0.0005	0.0215657	BP	2	G. hirsutum
GO:0032446	protein modification by small protein co...	86	25	12.75	0.00051	0.0215657	BP	2	G. hirsutum
GO:0070647	protein modification by small protein co...	86	25	12.75	0.00051	0.0215657	BP	2	G. hirsutum
GO:1903509	liposaccharide metabolic process	75	22	11.12	0.00095	0.0383455	BP	2	G. hirsutum
GO:0032259	methylation	76	22	11.27	0.00115	0.0444	BP	2	G. hirsutum
GO:0022613	ribonucleoprotein complex biogenesis	49	16	7.26	0.00132	0.0468864	BP	2	G. hirsutum
GO:0042254	ribosome biogenesis	49	16	7.26	0.00132	0.0468864	BP	2	G. hirsutum
GO:0003677	DNA binding	1728	214	136.21	3.1e-12	1.9592e-09	MF	3	G. hirsutum
GO:0003676	nucleic acid binding	2686	296	211.72	1.2e-10	3.792e-08	MF	3	G. hirsutum
GO:0003777	microtubule motor activity	86	23	6.78	1.3e-07	2.73867e-05	MF	3	G. hirsutum
GO:0016851	magnesium chelatase activity	14	8	1.1	2.8e-06	0.000294933	MF	3	G. hirsutum
GO:0051002	ligase activity, forming nitrogen-metal ...	14	8	1.1	2.8e-06	0.000294933	MF	3	G. hirsutum
GO:0051003	ligase activity, forming nitrogen-metal ...	14	8	1.1	2.8e-06	0.000294933	MF	3	G. hirsutum
GO:0003697	single-stranded DNA binding	15	8	1.18	5.7e-06	0.0004582	MF	3	G. hirsutum
GO:0003774	motor activity	120	25	9.46	5.8e-06	0.0004582	MF	3	G. hirsutum
GO:1901363	heterocyclic compound binding	6363	565	501.56	7.9e-05	0.0052456	MF	3	G. hirsutum
GO:0097159	organic cyclic compound binding	6366	565	501.8	8.3e-05	0.0052456	MF	3	G. hirsutum
GO:0003700	DNA-binding transcription factor activit...	717	84	56.52	0.00015	0.007505	MF	3	G. hirsutum
GO:0042393	histone binding	17	7	1.34	0.00018	0.007505	MF	3	G. hirsutum
GO:0004748	ribonucleoside-diphosphate reductase act...	5	4	0.39	0.00018	0.007505	MF	3	G. hirsutum
GO:0016728	oxidoreductase activity, acting on CH or...	5	4	0.39	0.00018	0.007505	MF	3	G. hirsutum
GO:0061731	ribonucleoside-diphosphate reductase act...	5	4	0.39	0.00018	0.007505	MF	3	G. hirsutum
GO:0140110	transcription regulator activity	733	85	57.78	0.00019	0.007505	MF	3	G. hirsutum
GO:0000156	phosphorelay response regulator activity	63	14	4.97	0.00032	0.0118965	MF	3	G. hirsutum
GO:0016725	oxidoreductase activity, acting on CH or...	6	4	0.47	0.00051	0.0179067	MF	3	G. hirsutum
GO:0060089	molecular transducer activity	88	16	6.94	0.00129	0.0429095	MF	3	G. hirsutum
GO:0008094	DNA-dependent ATPase activity	17	6	1.34	0.00137	0.043292	MF	3	G. hirsutum
GO:0019139	cytokinin dehydrogenase activity	12	5	0.95	0.00149	0.0448419	MF	3	G. hirsutum
GO:0090304	nucleic acid metabolic process	1976	216	148.74	1.1e-09	9.768e-07	BP	3	G. hirsutum
GO:0006260	DNA replication	65	21	4.89	5.1e-09	2.2644e-06	BP	3	G. hirsutum
GO:0006928	movement of cell or subcellular componen...	86	23	6.47	5.3e-08	1.1766e-05	BP	3	G. hirsutum
GO:0007018	microtubule-based movement	86	23	6.47	5.3e-08	1.1766e-05	BP	3	G. hirsutum
GO:0046483	heterocycle metabolic process	2352	239	177.04	9.1e-08	1.39543e-05	BP	3	G. hirsutum
GO:0006725	cellular aromatic compound metabolic pro...	2353	239	177.11	9.5e-08	1.39543e-05	BP	3	G. hirsutum
GO:0015995	chlorophyll biosynthetic process	14	9	1.05	1.1e-07	1.39543e-05	BP	3	G. hirsutum
GO:0006139	nucleobase-containing compound metabolic...	2248	229	169.21	1.6e-07	1.776e-05	BP	3	G. hirsutum
GO:0009432	SOS response	9	7	0.68	4.2e-07	3.108e-05	BP	3	G. hirsutum
GO:0009991	response to extracellular stimulus	9	7	0.68	4.2e-07	3.108e-05	BP	3	G. hirsutum
GO:0031668	cellular response to extracellular stimu...	9	7	0.68	4.2e-07	3.108e-05	BP	3	G. hirsutum
GO:0071496	cellular response to external stimulus	9	7	0.68	4.2e-07	3.108e-05	BP	3	G. hirsutum
GO:0006259	DNA metabolic process	270	44	20.32	8e-07	5.46462e-05	BP	3	G. hirsutum
GO:0007017	microtubule-based process	108	24	8.13	1.2e-06	6.54316e-05	BP	3	G. hirsutum
GO:0032774	RNA biosynthetic process	1417	153	106.66	1.3e-06	6.54316e-05	BP	3	G. hirsutum
GO:0009889	regulation of biosynthetic process	1272	140	95.75	1.4e-06	6.54316e-05	BP	3	G. hirsutum
GO:0010556	regulation of macromolecule biosynthetic...	1272	140	95.75	1.4e-06	6.54316e-05	BP	3	G. hirsutum
GO:0031326	regulation of cellular biosynthetic proc...	1272	140	95.75	1.4e-06	6.54316e-05	BP	3	G. hirsutum
GO:2000112	regulation of cellular macromolecule bio...	1272	140	95.75	1.4e-06	6.54316e-05	BP	3	G. hirsutum
GO:0015994	chlorophyll metabolic process	18	9	1.35	1.9e-06	8.436e-05	BP	3	G. hirsutum
GO:0010468	regulation of gene expression	1273	139	95.82	2.3e-06	9.72571e-05	BP	3	G. hirsutum
GO:0006351	transcription, DNA-templated	1415	151	106.51	3e-06	0.000101956	BP	3	G. hirsutum
GO:0097659	nucleic acid-templated transcription	1415	151	106.51	3e-06	0.000101956	BP	3	G. hirsutum
GO:0019219	regulation of nucleobase-containing comp...	1257	137	94.62	3.1e-06	0.000101956	BP	3	G. hirsutum
GO:0031323	regulation of cellular metabolic process	1291	140	97.18	3.1e-06	0.000101956	BP	3	G. hirsutum
GO:0051171	regulation of nitrogen compound metaboli...	1291	140	97.18	3.1e-06	0.000101956	BP	3	G. hirsutum
GO:0080090	regulation of primary metabolic process	1291	140	97.18	3.1e-06	0.000101956	BP	3	G. hirsutum
GO:0060255	regulation of macromolecule metabolic pr...	1295	140	97.48	3.7e-06	0.000113018	BP	3	G. hirsutum
GO:0019222	regulation of metabolic process	1297	140	97.63	4e-06	0.000113018	BP	3	G. hirsutum
GO:0006355	regulation of transcription, DNA-templat...	1253	136	94.32	4.2e-06	0.000113018	BP	3	G. hirsutum
GO:0051252	regulation of RNA metabolic process	1253	136	94.32	4.2e-06	0.000113018	BP	3	G. hirsutum
GO:1903506	regulation of nucleic acid-templated tra...	1253	136	94.32	4.2e-06	0.000113018	BP	3	G. hirsutum
GO:2001141	regulation of RNA biosynthetic process	1253	136	94.32	4.2e-06	0.000113018	BP	3	G. hirsutum
GO:0018130	heterocycle biosynthetic process	1657	171	124.73	4.6e-06	0.000120141	BP	3	G. hirsutum
GO:0019438	aromatic compound biosynthetic process	1650	170	124.2	5.5e-06	0.000139543	BP	3	G. hirsutum
GO:1901360	organic cyclic compound metabolic proces...	2464	238	185.47	6.2e-06	0.000152933	BP	3	G. hirsutum
GO:0016070	RNA metabolic process	1719	175	129.39	8e-06	0.000192	BP	3	G. hirsutum
GO:0033014	tetrapyrrole biosynthetic process	41	12	3.09	3.1e-05	0.000724421	BP	3	G. hirsutum
GO:1901362	organic cyclic compound biosynthetic pro...	1778	175	133.83	5.8e-05	0.00132062	BP	3	G. hirsutum
GO:0034654	nucleobase-containing compound biosynthe...	1558	155	117.27	0.0001	0.00222	BP	3	G. hirsutum
GO:0009605	response to external stimulus	17	7	1.28	0.00013	0.00281561	BP	3	G. hirsutum
GO:0050794	regulation of cellular process	1818	176	136.84	0.00014	0.00289116	BP	3	G. hirsutum
GO:0006779	porphyrin-containing compound biosynthet...	28	9	2.11	0.00014	0.00289116	BP	3	G. hirsutum
GO:0000160	phosphorelay signal transduction system	77	16	5.8	0.00016	0.00322909	BP	3	G. hirsutum
GO:0050789	regulation of biological process	1840	177	138.5	0.00018	0.003552	BP	3	G. hirsutum
GO:0033013	tetrapyrrole metabolic process	49	12	3.69	0.00021	0.00405391	BP	3	G. hirsutum
GO:0065007	biological regulation	1947	184	146.55	0.00034	0.00642383	BP	3	G. hirsutum
GO:0006352	DNA-templated transcription, initiation	52	12	3.91	0.00038	0.00703	BP	3	G. hirsutum
GO:0046148	pigment biosynthetic process	33	9	2.48	0.00055	0.00996735	BP	3	G. hirsutum
GO:0034641	cellular nitrogen compound metabolic pro...	2926	261	220.24	0.00064	0.0113664	BP	3	G. hirsutum
GO:0006778	porphyrin-containing compound metabolic ...	36	9	2.71	0.0011	0.0191529	BP	3	G. hirsutum
GO:0043170	macromolecule metabolic process	5021	421	377.94	0.00121	0.0191871	BP	3	G. hirsutum
GO:0009690	cytokinin metabolic process	12	5	0.9	0.00121	0.0191871	BP	3	G. hirsutum
GO:0010817	regulation of hormone levels	12	5	0.9	0.00121	0.0191871	BP	3	G. hirsutum
GO:0034754	cellular hormone metabolic process	12	5	0.9	0.00121	0.0191871	BP	3	G. hirsutum
GO:0042445	hormone metabolic process	12	5	0.9	0.00121	0.0191871	BP	3	G. hirsutum
GO:0006261	DNA-dependent DNA replication	8	4	0.6	0.00175	0.0272632	BP	3	G. hirsutum
GO:0034645	cellular macromolecule biosynthetic proc...	2333	208	175.61	0.00289	0.043798	BP	3	G. hirsutum
GO:0042440	pigment metabolic process	41	9	3.09	0.00291	0.043798	BP	3	G. hirsutum
GO:0006807	nitrogen compound metabolic process	5431	448	408.8	0.003	0.0444	BP	3	G. hirsutum
GO:0009059	macromolecule biosynthetic process	2336	208	175.83	0.00308	0.0448367	BP	3	G. hirsutum
GO:0005634	nucleus	883	94	61.96	6.5e-06	0.0015145	CC	3	G. hirsutum
GO:0005694	chromosome	65	14	4.56	0.00012	0.01398	CC	3	G. hirsutum
GO:1990204	oxidoreductase complex	27	8	1.89	0.00037	0.0287367	CC	3	G. hirsutum
GO:0003677	DNA binding	1728	225	144.03	1.4e-12	8.848e-10	MF	4	G. hirsutum
GO:0003676	nucleic acid binding	2686	306	223.88	8.2e-10	2.5912e-07	MF	4	G. hirsutum
GO:0005488	binding	10185	944	848.91	3e-09	6.32e-07	MF	4	G. hirsutum
GO:0043565	sequence-specific DNA binding	482	76	40.17	4e-08	6.32e-06	MF	4	G. hirsutum
GO:0008270	zinc ion binding	740	102	61.68	2.3e-07	2.9072e-05	MF	4	G. hirsutum
GO:0003700	DNA-binding transcription factor activit...	717	92	59.76	1.8e-05	0.001896	MF	4	G. hirsutum
GO:0140110	transcription regulator activity	733	92	61.1	4.3e-05	0.00388229	MF	4	G. hirsutum
GO:0043169	cation binding	1684	180	140.36	0.0002	0.0158	MF	4	G. hirsutum
GO:0046914	transition metal ion binding	1245	138	103.77	0.00026	0.0182578	MF	4	G. hirsutum
GO:1901363	heterocyclic compound binding	6363	588	530.35	0.00041	0.0209046	MF	4	G. hirsutum
GO:0046872	metal ion binding	1665	176	138.78	0.00041	0.0209046	MF	4	G. hirsutum
GO:0097159	organic cyclic compound binding	6366	588	530.6	0.00043	0.0209046	MF	4	G. hirsutum
GO:0005515	protein binding	3489	340	290.81	0.00043	0.0209046	MF	4	G. hirsutum
GO:0006355	regulation of transcription, DNA-templat...	1253	159	96.95	5.7e-11	1.2654e-08	BP	4	G. hirsutum
GO:0051252	regulation of RNA metabolic process	1253	159	96.95	5.7e-11	1.2654e-08	BP	4	G. hirsutum
GO:1903506	regulation of nucleic acid-templated tra...	1253	159	96.95	5.7e-11	1.2654e-08	BP	4	G. hirsutum
GO:2001141	regulation of RNA biosynthetic process	1253	159	96.95	5.7e-11	1.2654e-08	BP	4	G. hirsutum
GO:0019219	regulation of nucleobase-containing comp...	1257	159	97.26	7.4e-11	1.31424e-08	BP	4	G. hirsutum
GO:0009889	regulation of biosynthetic process	1272	159	98.42	1.9e-10	1.776e-08	BP	4	G. hirsutum
GO:0010556	regulation of macromolecule biosynthetic...	1272	159	98.42	1.9e-10	1.776e-08	BP	4	G. hirsutum
GO:0031326	regulation of cellular biosynthetic proc...	1272	159	98.42	1.9e-10	1.776e-08	BP	4	G. hirsutum
GO:2000112	regulation of cellular macromolecule bio...	1272	159	98.42	1.9e-10	1.776e-08	BP	4	G. hirsutum
GO:0010468	regulation of gene expression	1273	159	98.5	2e-10	1.776e-08	BP	4	G. hirsutum
GO:0006351	transcription, DNA-templated	1415	172	109.49	2.7e-10	1.96629e-08	BP	4	G. hirsutum
GO:0097659	nucleic acid-templated transcription	1415	172	109.49	2.7e-10	1.96629e-08	BP	4	G. hirsutum
GO:0032774	RNA biosynthetic process	1417	172	109.64	3e-10	1.96629e-08	BP	4	G. hirsutum
GO:0031323	regulation of cellular metabolic process	1291	160	99.89	3.1e-10	1.96629e-08	BP	4	G. hirsutum
GO:0019222	regulation of metabolic process	1297	160	100.35	4.4e-10	2.6048e-08	BP	4	G. hirsutum
GO:0051171	regulation of nitrogen compound metaboli...	1291	159	99.89	5.7e-10	2.97741e-08	BP	4	G. hirsutum
GO:0080090	regulation of primary metabolic process	1291	159	99.89	5.7e-10	2.97741e-08	BP	4	G. hirsutum
GO:0060255	regulation of macromolecule metabolic pr...	1295	159	100.2	7.2e-10	3.552e-08	BP	4	G. hirsutum
GO:0016070	RNA metabolic process	1719	194	133.01	7.9e-09	3.69221e-07	BP	4	G. hirsutum
GO:0065007	biological regulation	1947	213	150.65	1.6e-08	7.104e-07	BP	4	G. hirsutum
GO:0050789	regulation of biological process	1840	203	142.37	2.1e-08	8.47636e-07	BP	4	G. hirsutum
GO:0050794	regulation of cellular process	1818	201	140.67	2.1e-08	8.47636e-07	BP	4	G. hirsutum
GO:0034654	nucleobase-containing compound biosynthe...	1558	175	120.55	7.6e-08	2.93426e-06	BP	4	G. hirsutum
GO:0090304	nucleic acid metabolic process	1976	208	152.89	5.4e-07	1.998e-05	BP	4	G. hirsutum
GO:0019438	aromatic compound biosynthetic process	1650	178	127.67	9.5e-07	3.3744e-05	BP	4	G. hirsutum
GO:1901362	organic cyclic compound biosynthetic pro...	1778	189	137.57	1.1e-06	3.75692e-05	BP	4	G. hirsutum
GO:0018130	heterocycle biosynthetic process	1657	177	128.21	2e-06	6.57778e-05	BP	4	G. hirsutum
GO:0006139	nucleobase-containing compound metabolic...	2248	217	173.94	0.00013	0.00412286	BP	4	G. hirsutum
GO:0046483	heterocycle metabolic process	2352	222	181.99	0.0004	0.012136	BP	4	G. hirsutum
GO:0006725	cellular aromatic compound metabolic pro...	2353	222	182.06	0.00041	0.012136	BP	4	G. hirsutum
GO:1901360	organic cyclic compound metabolic proces...	2464	231	190.65	0.00044	0.0126039	BP	4	G. hirsutum
GO:0043170	macromolecule metabolic process	5021	434	388.5	0.00077	0.0213675	BP	4	G. hirsutum
GO:0044260	cellular macromolecule metabolic process	4378	383	338.75	0.00086	0.0231418	BP	4	G. hirsutum
GO:0005634	nucleus	883	120	66.52	2.2e-12	5.126e-10	CC	4	G. hirsutum
GO:0043231	intracellular membrane-bounded organelle	1205	132	90.78	4.5e-07	5.2425e-05	CC	4	G. hirsutum
GO:0043227	membrane-bounded organelle	1226	133	92.36	7.2e-07	5.592e-05	CC	4	G. hirsutum
GO:0004298	threonine-type endopeptidase activity	39	18	3	1.1e-10	3.465e-08	MF	5	G. hirsutum
GO:0070003	threonine-type peptidase activity	39	18	3	1.1e-10	3.465e-08	MF	5	G. hirsutum
GO:0003723	RNA binding	391	63	30.12	1.5e-08	3.15e-06	MF	5	G. hirsutum
GO:0008565	protein transporter activity	42	16	3.24	3.4e-08	5.355e-06	MF	5	G. hirsutum
GO:0019001	guanyl nucleotide binding	346	55	26.66	2e-07	1.638e-05	MF	5	G. hirsutum
GO:0001883	purine nucleoside binding	340	54	26.19	2.6e-07	1.638e-05	MF	5	G. hirsutum
GO:0005525	GTP binding	340	54	26.19	2.6e-07	1.638e-05	MF	5	G. hirsutum
GO:0032549	ribonucleoside binding	340	54	26.19	2.6e-07	1.638e-05	MF	5	G. hirsutum
GO:0032550	purine ribonucleoside binding	340	54	26.19	2.6e-07	1.638e-05	MF	5	G. hirsutum
GO:0032561	guanyl ribonucleotide binding	340	54	26.19	2.6e-07	1.638e-05	MF	5	G. hirsutum
GO:0001882	nucleoside binding	341	54	26.27	2.9e-07	1.66091e-05	MF	5	G. hirsutum
GO:0003924	GTPase activity	201	36	15.49	1.5e-06	7.875e-05	MF	5	G. hirsutum
GO:0004576	oligosaccharyl transferase activity	12	7	0.92	8.9e-06	0.000431308	MF	5	G. hirsutum
GO:0019843	rRNA binding	22	9	1.69	1.8e-05	0.00081	MF	5	G. hirsutum
GO:0015078	proton transmembrane transporter activit...	152	25	11.71	0.00024	0.00963529	MF	5	G. hirsutum
GO:0008121	ubiquinol-cytochrome-c reductase activit...	9	5	0.69	0.00026	0.00963529	MF	5	G. hirsutum
GO:0016681	oxidoreductase activity, acting on diphe...	9	5	0.69	0.00026	0.00963529	MF	5	G. hirsutum
GO:0140101	catalytic activity, acting on a tRNA	121	21	9.32	0.00035	0.01197	MF	5	G. hirsutum
GO:0004812	aminoacyl-tRNA ligase activity	73	15	5.62	0.00038	0.01197	MF	5	G. hirsutum
GO:0016875	ligase activity, forming carbon-oxygen b...	73	15	5.62	0.00038	0.01197	MF	5	G. hirsutum
GO:0004807	triose-phosphate isomerase activity	6	4	0.46	0.00046	0.0138	MF	5	G. hirsutum
GO:0008233	peptidase activity	513	59	39.52	0.00124	0.0342391	MF	5	G. hirsutum
GO:0004175	endopeptidase activity	346	43	26.66	0.00125	0.0342391	MF	5	G. hirsutum
GO:0004129	cytochrome-c oxidase activity	18	6	1.39	0.00171	0.0376031	MF	5	G. hirsutum
GO:0016675	oxidoreductase activity, acting on a hem...	18	6	1.39	0.00171	0.0376031	MF	5	G. hirsutum
GO:0016676	oxidoreductase activity, acting on a hem...	18	6	1.39	0.00171	0.0376031	MF	5	G. hirsutum
GO:0004579	dolichyl-diphosphooligosaccharide-protei...	8	4	0.62	0.00191	0.0376031	MF	5	G. hirsutum
GO:0008320	protein transmembrane transporter activi...	8	4	0.62	0.00191	0.0376031	MF	5	G. hirsutum
GO:0015450	P-P-bond-hydrolysis-driven protein trans...	8	4	0.62	0.00191	0.0376031	MF	5	G. hirsutum
GO:0022884	macromolecule transmembrane transporter ...	8	4	0.62	0.00191	0.0376031	MF	5	G. hirsutum
GO:0042887	amide transmembrane transporter activity	8	4	0.62	0.00191	0.0376031	MF	5	G. hirsutum
GO:1904680	peptide transmembrane transporter activi...	8	4	0.62	0.00191	0.0376031	MF	5	G. hirsutum
GO:0016679	oxidoreductase activity, acting on diphe...	19	6	1.46	0.00234	0.0446727	MF	5	G. hirsutum
GO:0015077	monovalent inorganic cation transmembran...	198	27	15.25	0.00264	0.0489176	MF	5	G. hirsutum
GO:1901564	organonitrogen compound metabolic proces...	3556	461	310.04	6.3e-26	5.5566e-23	BP	5	G. hirsutum
GO:0044267	cellular protein metabolic process	2550	353	222.33	2.7e-23	1.1907e-20	BP	5	G. hirsutum
GO:0044271	cellular nitrogen compound biosynthetic ...	2289	322	199.58	5.3e-22	1.5582e-19	BP	5	G. hirsutum
GO:0044249	cellular biosynthetic process	2836	377	247.27	8.6e-22	1.8963e-19	BP	5	G. hirsutum
GO:0019538	protein metabolic process	2988	391	260.52	1.8e-21	3.1752e-19	BP	5	G. hirsutum
GO:1901576	organic substance biosynthetic process	2931	383	255.55	8.7e-21	1.2789e-18	BP	5	G. hirsutum
GO:0009058	biosynthetic process	3114	399	271.51	3.2e-20	4.032e-18	BP	5	G. hirsutum
GO:0034645	cellular macromolecule biosynthetic proc...	2333	319	203.41	1.1e-19	1.21275e-17	BP	5	G. hirsutum
GO:0009059	macromolecule biosynthetic process	2336	319	203.67	1.3e-19	1.274e-17	BP	5	G. hirsutum
GO:0010467	gene expression	2253	302	196.44	3.7e-17	3.2634e-15	BP	5	G. hirsutum
GO:0034641	cellular nitrogen compound metabolic pro...	2926	363	255.11	1.5e-15	1.20273e-13	BP	5	G. hirsutum
GO:0051641	cellular localization	242	52	21.1	6.4e-10	4.704e-08	BP	5	G. hirsutum
GO:0046907	intracellular transport	208	47	18.14	7.5e-10	4.725e-08	BP	5	G. hirsutum
GO:0051649	establishment of localization in cell	208	47	18.14	7.5e-10	4.725e-08	BP	5	G. hirsutum
GO:0006414	translational elongation	40	17	3.49	1.1e-08	6.468e-07	BP	5	G. hirsutum
GO:0006886	intracellular protein transport	190	42	16.57	1.2e-08	6.615e-07	BP	5	G. hirsutum
GO:0034613	cellular protein localization	209	44	18.22	2.6e-08	1.274e-06	BP	5	G. hirsutum
GO:0070727	cellular macromolecule localization	209	44	18.22	2.6e-08	1.274e-06	BP	5	G. hirsutum
GO:0045184	establishment of protein localization	242	47	21.1	1.2e-07	5.57053e-06	BP	5	G. hirsutum
GO:0015031	protein transport	235	46	20.49	1.3e-07	5.733e-06	BP	5	G. hirsutum
GO:0006605	protein targeting	28	13	2.44	1.7e-07	7.14e-06	BP	5	G. hirsutum
GO:0008104	protein localization	258	48	22.49	3.3e-07	1.30383e-05	BP	5	G. hirsutum
GO:0033036	macromolecule localization	266	49	23.19	3.4e-07	1.30383e-05	BP	5	G. hirsutum
GO:0044281	small molecule metabolic process	729	99	63.56	4.1e-06	0.000150675	BP	5	G. hirsutum
GO:0015833	peptide transport	302	47	26.33	6.3e-05	0.00209855	BP	5	G. hirsutum
GO:0042886	amide transport	302	47	26.33	6.3e-05	0.00209855	BP	5	G. hirsutum
GO:0006487	protein N-linked glycosylation	10	6	0.87	6.7e-05	0.00209855	BP	5	G. hirsutum
GO:0072594	establishment of protein localization to...	33	11	2.88	6.7e-05	0.00209855	BP	5	G. hirsutum
GO:0071702	organic substance transport	329	50	28.69	6.9e-05	0.00209855	BP	5	G. hirsutum
GO:0071705	nitrogen compound transport	304	47	26.51	7.4e-05	0.0021756	BP	5	G. hirsutum
GO:0009987	cellular process	6807	648	593.5	0.00012	0.00341419	BP	5	G. hirsutum
GO:0072657	protein localization to membrane	30	10	2.62	0.00014	0.00374182	BP	5	G. hirsutum
GO:0090150	establishment of protein localization to...	30	10	2.62	0.00014	0.00374182	BP	5	G. hirsutum
GO:1901135	carbohydrate derivative metabolic proces...	379	54	33.04	0.0002	0.00517696	BP	5	G. hirsutum
GO:0046034	ATP metabolic process	127	24	11.07	0.00022	0.00517696	BP	5	G. hirsutum
GO:0006626	protein targeting to mitochondrion	12	6	1.05	0.00025	0.00517696	BP	5	G. hirsutum
GO:0006839	mitochondrial transport	12	6	1.05	0.00025	0.00517696	BP	5	G. hirsutum
GO:0007006	mitochondrial membrane organization	12	6	1.05	0.00025	0.00517696	BP	5	G. hirsutum
GO:0070585	protein localization to mitochondrion	12	6	1.05	0.00025	0.00517696	BP	5	G. hirsutum
GO:0072655	establishment of protein localization to...	12	6	1.05	0.00025	0.00517696	BP	5	G. hirsutum
GO:0090151	establishment of protein localization to...	12	6	1.05	0.00025	0.00517696	BP	5	G. hirsutum
GO:0009144	purine nucleoside triphosphate metabolic...	136	25	11.86	0.00026	0.00517696	BP	5	G. hirsutum
GO:0009199	ribonucleoside triphosphate metabolic pr...	136	25	11.86	0.00026	0.00517696	BP	5	G. hirsutum
GO:0009205	purine ribonucleoside triphosphate metab...	136	25	11.86	0.00026	0.00517696	BP	5	G. hirsutum
GO:0006122	mitochondrial electron transport, ubiqui...	5	4	0.44	0.00027	0.00517696	BP	5	G. hirsutum
GO:0042775	mitochondrial ATP synthesis coupled elec...	5	4	0.44	0.00027	0.00517696	BP	5	G. hirsutum
GO:0009141	nucleoside triphosphate metabolic proces...	137	25	11.94	0.00029	0.00544213	BP	5	G. hirsutum
GO:0033365	protein localization to organelle	45	12	3.92	0.00035	0.00593654	BP	5	G. hirsutum
GO:0006486	protein glycosylation	58	14	5.06	0.00035	0.00593654	BP	5	G. hirsutum
GO:0009100	glycoprotein metabolic process	58	14	5.06	0.00035	0.00593654	BP	5	G. hirsutum
GO:0009101	glycoprotein biosynthetic process	58	14	5.06	0.00035	0.00593654	BP	5	G. hirsutum
GO:0043413	macromolecule glycosylation	58	14	5.06	0.00035	0.00593654	BP	5	G. hirsutum
GO:0006807	nitrogen compound metabolic process	5431	525	473.52	0.00036	0.00599094	BP	5	G. hirsutum
GO:0017144	drug metabolic process	222	35	19.36	0.00041	0.00669667	BP	5	G. hirsutum
GO:0007005	mitochondrion organization	13	6	1.13	0.00043	0.00689564	BP	5	G. hirsutum
GO:0019693	ribose phosphate metabolic process	190	31	16.57	0.00047	0.0074025	BP	5	G. hirsutum
GO:1901137	carbohydrate derivative biosynthetic pro...	244	37	21.27	0.00061	0.00943895	BP	5	G. hirsutum
GO:0009126	purine nucleoside monophosphate metaboli...	136	24	11.86	0.00064	0.00956746	BP	5	G. hirsutum
GO:0009167	purine ribonucleoside monophosphate meta...	136	24	11.86	0.00064	0.00956746	BP	5	G. hirsutum
GO:0017038	protein import	24	8	2.09	0.00067	0.009849	BP	5	G. hirsutum
GO:0007007	inner mitochondrial membrane organizatio...	6	4	0.52	0.00075	0.0100227	BP	5	G. hirsutum
GO:0044743	protein transmembrane import into intrac...	6	4	0.52	0.00075	0.0100227	BP	5	G. hirsutum
GO:0045039	protein import into mitochondrial inner ...	6	4	0.52	0.00075	0.0100227	BP	5	G. hirsutum
GO:0065002	intracellular protein transmembrane tran...	6	4	0.52	0.00075	0.0100227	BP	5	G. hirsutum
GO:0071806	protein transmembrane transport	6	4	0.52	0.00075	0.0100227	BP	5	G. hirsutum
GO:1990542	mitochondrial transmembrane transport	6	4	0.52	0.00075	0.0100227	BP	5	G. hirsutum
GO:0009142	nucleoside triphosphate biosynthetic pro...	99	19	8.63	0.0008	0.01008	BP	5	G. hirsutum
GO:0009145	purine nucleoside triphosphate biosynthe...	99	19	8.63	0.0008	0.01008	BP	5	G. hirsutum
GO:0009201	ribonucleoside triphosphate biosynthetic...	99	19	8.63	0.0008	0.01008	BP	5	G. hirsutum
GO:0009206	purine ribonucleoside triphosphate biosy...	99	19	8.63	0.0008	0.01008	BP	5	G. hirsutum
GO:0055086	nucleobase-containing small molecule met...	248	37	21.62	0.00083	0.0103107	BP	5	G. hirsutum
GO:0009161	ribonucleoside monophosphate metabolic p...	139	24	12.12	0.00088	0.01078	BP	5	G. hirsutum
GO:0006754	ATP biosynthetic process	93	18	8.11	0.00099	0.0119189	BP	5	G. hirsutum
GO:0070085	glycosylation	71	15	6.19	0.001	0.0119189	BP	5	G. hirsutum
GO:1901575	organic substance catabolic process	297	42	25.9	0.00116	0.0136416	BP	5	G. hirsutum
GO:0009123	nucleoside monophosphate metabolic proce...	142	24	12.38	0.0012	0.0139263	BP	5	G. hirsutum
GO:0030163	protein catabolic process	151	25	13.17	0.0013	0.0148489	BP	5	G. hirsutum
GO:0019752	carboxylic acid metabolic process	466	60	40.63	0.00133	0.0148489	BP	5	G. hirsutum
GO:0043436	oxoacid metabolic process	466	60	40.63	0.00133	0.0148489	BP	5	G. hirsutum
GO:0006418	tRNA aminoacylation for protein translat...	73	15	6.36	0.00135	0.0148837	BP	5	G. hirsutum
GO:0061024	membrane organization	21	7	1.83	0.00146	0.015778	BP	5	G. hirsutum
GO:0006082	organic acid metabolic process	468	60	40.8	0.00147	0.015778	BP	5	G. hirsutum
GO:0009117	nucleotide metabolic process	212	32	18.48	0.0015	0.015778	BP	5	G. hirsutum
GO:0043038	amino acid activation	74	15	6.45	0.00156	0.015778	BP	5	G. hirsutum
GO:0043039	tRNA aminoacylation	74	15	6.45	0.00156	0.015778	BP	5	G. hirsutum
GO:0044283	small molecule biosynthetic process	302	42	26.33	0.00161	0.015778	BP	5	G. hirsutum
GO:0032879	regulation of localization	16	6	1.4	0.00161	0.015778	BP	5	G. hirsutum
GO:0043269	regulation of ion transport	16	6	1.4	0.00161	0.015778	BP	5	G. hirsutum
GO:0044070	regulation of anion transport	16	6	1.4	0.00161	0.015778	BP	5	G. hirsutum
GO:0051049	regulation of transport	16	6	1.4	0.00161	0.015778	BP	5	G. hirsutum
GO:0009150	purine ribonucleotide metabolic process	162	26	14.12	0.00167	0.0161862	BP	5	G. hirsutum
GO:0044257	cellular protein catabolic process	146	24	12.73	0.00178	0.0168813	BP	5	G. hirsutum
GO:0051603	proteolysis involved in cellular protein...	146	24	12.73	0.00178	0.0168813	BP	5	G. hirsutum
GO:0006766	vitamin metabolic process	28	8	2.44	0.00207	0.0188221	BP	5	G. hirsutum
GO:0006767	water-soluble vitamin metabolic process	28	8	2.44	0.00207	0.0188221	BP	5	G. hirsutum
GO:0009110	vitamin biosynthetic process	28	8	2.44	0.00207	0.0188221	BP	5	G. hirsutum
GO:0042364	water-soluble vitamin biosynthetic proce...	28	8	2.44	0.00207	0.0188221	BP	5	G. hirsutum
GO:0009259	ribonucleotide metabolic process	165	26	14.39	0.00218	0.01962	BP	5	G. hirsutum
GO:0006163	purine nucleotide metabolic process	166	26	14.47	0.00237	0.0211145	BP	5	G. hirsutum
GO:0006753	nucleoside phosphate metabolic process	219	32	19.09	0.00255	0.0223556	BP	5	G. hirsutum
GO:1902600	proton transmembrane transport	93	17	8.11	0.00256	0.0223556	BP	5	G. hirsutum
GO:0072521	purine-containing compound metabolic pro...	168	26	14.65	0.00281	0.0240623	BP	5	G. hirsutum
GO:0072524	pyridine-containing compound metabolic p...	86	16	7.5	0.00281	0.0240623	BP	5	G. hirsutum
GO:0009152	purine ribonucleotide biosynthetic proce...	110	19	9.59	0.0029	0.0242134	BP	5	G. hirsutum
GO:0009127	purine nucleoside monophosphate biosynth...	102	18	8.89	0.00291	0.0242134	BP	5	G. hirsutum
GO:0009168	purine ribonucleoside monophosphate bios...	102	18	8.89	0.00291	0.0242134	BP	5	G. hirsutum
GO:0044260	cellular macromolecule metabolic process	4378	422	381.71	0.00344	0.0283559	BP	5	G. hirsutum
GO:0006732	coenzyme metabolic process	129	21	11.25	0.00376	0.0307067	BP	5	G. hirsutum
GO:0019362	pyridine nucleotide metabolic process	81	15	7.06	0.00393	0.0310247	BP	5	G. hirsutum
GO:0046496	nicotinamide nucleotide metabolic proces...	81	15	7.06	0.00393	0.0310247	BP	5	G. hirsutum
GO:0009260	ribonucleotide biosynthetic process	113	19	9.85	0.00396	0.0310247	BP	5	G. hirsutum
GO:0046390	ribose phosphate biosynthetic process	113	19	9.85	0.00396	0.0310247	BP	5	G. hirsutum
GO:0044265	cellular macromolecule catabolic process	155	24	13.51	0.00398	0.0310247	BP	5	G. hirsutum
GO:0009156	ribonucleoside monophosphate biosyntheti...	105	18	9.15	0.00401	0.0310247	BP	5	G. hirsutum
GO:0006164	purine nucleotide biosynthetic process	114	19	9.94	0.00437	0.033516	BP	5	G. hirsutum
GO:0006733	oxidoreduction coenzyme metabolic proces...	82	15	7.15	0.00444	0.0337593	BP	5	G. hirsutum
GO:0006457	protein folding	132	21	11.51	0.00495	0.0373154	BP	5	G. hirsutum
GO:0009056	catabolic process	331	43	28.86	0.00517	0.0386436	BP	5	G. hirsutum
GO:0072522	purine-containing compound biosynthetic ...	116	19	10.11	0.00531	0.0393565	BP	5	G. hirsutum
GO:0009124	nucleoside monophosphate biosynthetic pr...	108	18	9.42	0.00545	0.0400575	BP	5	G. hirsutum
GO:1901565	organonitrogen compound catabolic proces...	186	27	16.22	0.00579	0.0422048	BP	5	G. hirsutum
GO:0043226	organelle	1818	349	222.6	1.2e-28	1.356e-26	CC	5	G. hirsutum
GO:0043229	intracellular organelle	1818	349	222.6	1.2e-28	1.356e-26	CC	5	G. hirsutum
GO:0044424	intracellular part	2481	429	303.78	1e-27	7.53333e-26	CC	5	G. hirsutum
GO:0005622	intracellular	2903	466	355.45	3.4e-23	1.921e-21	CC	5	G. hirsutum
GO:0005623	cell	3058	476	374.42	1.9e-20	7.15667e-19	CC	5	G. hirsutum
GO:0044464	cell part	3058	476	374.42	1.9e-20	7.15667e-19	CC	5	G. hirsutum
GO:0005739	mitochondrion	91	43	11.14	9.4e-17	3.03486e-15	CC	5	G. hirsutum
GO:0044429	mitochondrial part	80	37	9.8	3.3e-14	9.3225e-13	CC	5	G. hirsutum
GO:0005740	mitochondrial envelope	72	33	8.82	1.2e-12	3.01333e-11	CC	5	G. hirsutum
GO:0031966	mitochondrial membrane	52	25	6.37	1.9e-10	4.10909e-09	CC	5	G. hirsutum
GO:0031967	organelle envelope	84	33	10.29	2e-10	4.10909e-09	CC	5	G. hirsutum
GO:0098798	mitochondrial protein complex	32	18	3.92	2.7e-09	5.085e-08	CC	5	G. hirsutum
GO:0031975	envelope	99	33	12.12	2.6e-08	4.52e-07	CC	5	G. hirsutum
GO:0005743	mitochondrial inner membrane	29	16	3.55	3.1e-08	5.00429e-07	CC	5	G. hirsutum
GO:0044455	mitochondrial membrane part	30	16	3.67	5.9e-08	8.50824e-07	CC	5	G. hirsutum
GO:0000502	proteasome complex	41	19	5.02	6.4e-08	8.50824e-07	CC	5	G. hirsutum
GO:1905369	endopeptidase complex	41	19	5.02	6.4e-08	8.50824e-07	CC	5	G. hirsutum
GO:0019866	organelle inner membrane	31	16	3.8	1.1e-07	1.38111e-06	CC	5	G. hirsutum
GO:0005839	proteasome core complex	39	18	4.78	1.6e-07	1.90316e-06	CC	5	G. hirsutum
GO:1905368	peptidase complex	49	20	6	3.8e-07	4.294e-06	CC	5	G. hirsutum
GO:0019773	proteasome core complex, alpha-subunit c...	17	11	2.08	5.3e-07	5.70381e-06	CC	5	G. hirsutum
GO:0031090	organelle membrane	125	35	15.31	1.2e-06	1.23273e-05	CC	5	G. hirsutum
GO:0098800	inner mitochondrial membrane protein com...	19	11	2.33	2.5e-06	2.45652e-05	CC	5	G. hirsutum
GO:0019867	outer membrane	31	12	3.8	0.00016	0.00150667	CC	5	G. hirsutum
GO:0005741	mitochondrial outer membrane	23	9	2.82	0.00097	0.00843154	CC	5	G. hirsutum
GO:0031968	organelle outer membrane	23	9	2.82	0.00097	0.00843154	CC	5	G. hirsutum
GO:0005753	mitochondrial proton-transporting ATP sy...	15	7	1.84	0.00106	0.00887259	CC	5	G. hirsutum
GO:0044422	organelle part	398	69	48.73	0.00125	0.00974138	CC	5	G. hirsutum
GO:0044446	intracellular organelle part	398	69	48.73	0.00125	0.00974138	CC	5	G. hirsutum
GO:0015934	large ribosomal subunit	9	5	1.1	0.00223	0.0162574	CC	5	G. hirsutum
GO:0044391	ribosomal subunit	9	5	1.1	0.00223	0.0162574	CC	5	G. hirsutum
GO:0005853	eukaryotic translation elongation factor...	6	4	0.73	0.00272	0.0186279	CC	5	G. hirsutum
GO:0042719	mitochondrial intermembrane space protei...	6	4	0.73	0.00272	0.0186279	CC	5	G. hirsutum
GO:0005783	endoplasmic reticulum	99	22	12.12	0.00349	0.0231982	CC	5	G. hirsutum
GO:0140098	catalytic activity, acting on RNA	278	38	9.62	3.9e-13	2.4648e-10	MF	6	G. hirsutum
GO:0140101	catalytic activity, acting on a tRNA	121	24	4.19	3.1e-12	9.164e-10	MF	6	G. hirsutum
GO:0016668	oxidoreductase activity, acting on a sul...	84	20	2.91	5.8e-12	9.164e-10	MF	6	G. hirsutum
GO:0047134	protein-disulfide reductase activity	84	20	2.91	5.8e-12	9.164e-10	MF	6	G. hirsutum
GO:0004812	aminoacyl-tRNA ligase activity	73	17	2.53	3.3e-10	3.476e-08	MF	6	G. hirsutum
GO:0016875	ligase activity, forming carbon-oxygen b...	73	17	2.53	3.3e-10	3.476e-08	MF	6	G. hirsutum
GO:0043531	ADP binding	272	31	9.41	5.7e-09	5.14629e-07	MF	6	G. hirsutum
GO:0015036	disulfide oxidoreductase activity	139	21	4.81	1.3e-08	1.027e-06	MF	6	G. hirsutum
GO:0016651	oxidoreductase activity, acting on NAD(P...	147	21	5.09	3.5e-08	2.45778e-06	MF	6	G. hirsutum
GO:0016667	oxidoreductase activity, acting on a sul...	155	21	5.36	8.9e-08	5.6248e-06	MF	6	G. hirsutum
GO:0016426	tRNA (adenine) methyltransferase activit...	12	6	0.42	1.3e-06	6.84667e-05	MF	6	G. hirsutum
GO:0016429	tRNA (adenine-N1-)-methyltransferase act...	12	6	0.42	1.3e-06	6.84667e-05	MF	6	G. hirsutum
GO:0046983	protein dimerization activity	285	27	9.86	2.2e-06	0.000106954	MF	6	G. hirsutum
GO:0016874	ligase activity	285	26	9.86	6.9e-06	0.000311486	MF	6	G. hirsutum
GO:0016779	nucleotidyltransferase activity	193	20	6.68	1.2e-05	0.0005056	MF	6	G. hirsutum
GO:0036094	small molecule binding	3543	164	122.59	1.7e-05	0.0006715	MF	6	G. hirsutum
GO:0016810	hydrolase activity, acting on carbon-nit...	46	9	1.59	2.3e-05	0.000798316	MF	6	G. hirsutum
GO:0000166	nucleotide binding	3380	157	116.95	2.4e-05	0.000798316	MF	6	G. hirsutum
GO:1901265	nucleoside phosphate binding	3380	157	116.95	2.4e-05	0.000798316	MF	6	G. hirsutum
GO:0004827	proline-tRNA ligase activity	7	4	0.24	4.6e-05	0.0014536	MF	6	G. hirsutum
GO:0003735	structural constituent of ribosome	481	34	16.64	6.7e-05	0.00201638	MF	6	G. hirsutum
GO:0005198	structural molecule activity	548	37	18.96	8.4e-05	0.00241309	MF	6	G. hirsutum
GO:0097367	carbohydrate derivative binding	3088	142	106.85	0.00011	0.00302261	MF	6	G. hirsutum
GO:0034062	5'-3' RNA polymerase activity	96	12	3.32	0.00012	0.0030336	MF	6	G. hirsutum
GO:0097747	RNA polymerase activity	96	12	3.32	0.00012	0.0030336	MF	6	G. hirsutum
GO:0032553	ribonucleotide binding	3072	141	106.3	0.00013	0.00316	MF	6	G. hirsutum
GO:0032555	purine ribonucleotide binding	3051	140	105.57	0.00014	0.00327704	MF	6	G. hirsutum
GO:0017076	purine nucleotide binding	3063	140	105.98	0.00017	0.00383714	MF	6	G. hirsutum
GO:0043168	anion binding	3484	156	120.55	0.00018	0.00392276	MF	6	G. hirsutum
GO:0003899	DNA-directed 5'-3' RNA polymerase activi...	88	11	3.04	0.00022	0.00463467	MF	6	G. hirsutum
GO:0051287	NAD binding	62	9	2.15	0.00026	0.00530065	MF	6	G. hirsutum
GO:0008175	tRNA methyltransferase activity	27	6	0.93	0.00027	0.0053325	MF	6	G. hirsutum
GO:0008173	RNA methyltransferase activity	40	7	1.38	0.00039	0.00746909	MF	6	G. hirsutum
GO:0005337	nucleoside transmembrane transporter act...	7	3	0.24	0.0013	0.0237832	MF	6	G. hirsutum
GO:0015079	potassium ion transmembrane transporter ...	36	6	1.25	0.00134	0.0237832	MF	6	G. hirsutum
GO:0004356	glutamate-ammonia ligase activity	15	4	0.52	0.00143	0.0237832	MF	6	G. hirsutum
GO:0016211	ammonia ligase activity	15	4	0.52	0.00143	0.0237832	MF	6	G. hirsutum
GO:0016880	acid-ammonia (or amide) ligase activity	15	4	0.52	0.00143	0.0237832	MF	6	G. hirsutum
GO:0001883	purine nucleoside binding	340	23	11.76	0.00176	0.0258679	MF	6	G. hirsutum
GO:0005525	GTP binding	340	23	11.76	0.00176	0.0258679	MF	6	G. hirsutum
GO:0032549	ribonucleoside binding	340	23	11.76	0.00176	0.0258679	MF	6	G. hirsutum
GO:0032550	purine ribonucleoside binding	340	23	11.76	0.00176	0.0258679	MF	6	G. hirsutum
GO:0032561	guanyl ribonucleotide binding	340	23	11.76	0.00176	0.0258679	MF	6	G. hirsutum
GO:0001882	nucleoside binding	341	23	11.8	0.00183	0.0262855	MF	6	G. hirsutum
GO:0004298	threonine-type endopeptidase activity	39	6	1.35	0.00206	0.0283026	MF	6	G. hirsutum
GO:0070003	threonine-type peptidase activity	39	6	1.35	0.00206	0.0283026	MF	6	G. hirsutum
GO:0019001	guanyl nucleotide binding	346	23	11.97	0.0022	0.029583	MF	6	G. hirsutum
GO:0031625	ubiquitin protein ligase binding	19	4	0.66	0.00363	0.0468196	MF	6	G. hirsutum
GO:0044389	ubiquitin-like protein ligase binding	19	4	0.66	0.00363	0.0468196	MF	6	G. hirsutum
GO:0006399	tRNA metabolic process	161	28	5.69	2e-12	1.776e-09	BP	6	G. hirsutum
GO:0034660	ncRNA metabolic process	187	29	6.6	1.5e-11	6.66e-09	BP	6	G. hirsutum
GO:0006412	translation	635	56	22.42	1.5e-10	4.218e-08	BP	6	G. hirsutum
GO:0043043	peptide biosynthetic process	639	56	22.57	1.9e-10	4.218e-08	BP	6	G. hirsutum
GO:0006518	peptide metabolic process	647	56	22.85	3.1e-10	5.5056e-08	BP	6	G. hirsutum
GO:0006418	tRNA aminoacylation for protein translat...	73	17	2.58	4.3e-10	5.883e-08	BP	6	G. hirsutum
GO:0043038	amino acid activation	74	17	2.61	5.3e-10	5.883e-08	BP	6	G. hirsutum
GO:0043039	tRNA aminoacylation	74	17	2.61	5.3e-10	5.883e-08	BP	6	G. hirsutum
GO:0043604	amide biosynthetic process	662	56	23.38	7.4e-10	7.30133e-08	BP	6	G. hirsutum
GO:0043603	cellular amide metabolic process	679	56	23.98	1.9e-09	1.6872e-07	BP	6	G. hirsutum
GO:0030488	tRNA methylation	12	6	0.42	1.4e-06	0.000113018	BP	6	G. hirsutum
GO:1901566	organonitrogen compound biosynthetic pro...	1056	65	37.29	5.5e-06	0.000407	BP	6	G. hirsutum
GO:0044265	cellular macromolecule catabolic process	155	18	5.47	8.8e-06	0.000601108	BP	6	G. hirsutum
GO:0044257	cellular protein catabolic process	146	17	5.16	1.5e-05	0.000888	BP	6	G. hirsutum
GO:0051603	proteolysis involved in cellular protein...	146	17	5.16	1.5e-05	0.000888	BP	6	G. hirsutum
GO:0001510	RNA methylation	17	6	0.6	1.7e-05	0.0009435	BP	6	G. hirsutum
GO:0030163	protein catabolic process	151	17	5.33	2.3e-05	0.00120141	BP	6	G. hirsutum
GO:0044267	cellular protein metabolic process	2550	125	90.05	2.6e-05	0.00128267	BP	6	G. hirsutum
GO:0006433	prolyl-tRNA aminoacylation	7	4	0.25	4.9e-05	0.00229011	BP	6	G. hirsutum
GO:0006520	cellular amino acid metabolic process	262	23	9.25	5.4e-05	0.0023976	BP	6	G. hirsutum
GO:0008033	tRNA processing	89	12	3.14	6.5e-05	0.00274857	BP	6	G. hirsutum
GO:0009057	macromolecule catabolic process	188	18	6.64	0.00012	0.00484364	BP	6	G. hirsutum
GO:0006396	RNA processing	192	18	6.78	0.00015	0.0057913	BP	6	G. hirsutum
GO:0034470	ncRNA processing	112	13	3.96	0.00016	0.00592	BP	6	G. hirsutum
GO:0006400	tRNA modification	26	6	0.92	0.00024	0.0085248	BP	6	G. hirsutum
GO:0034641	cellular nitrogen compound metabolic pro...	2926	134	103.33	0.00031	0.0101956	BP	6	G. hirsutum
GO:1901565	organonitrogen compound catabolic proces...	186	17	6.57	0.00031	0.0101956	BP	6	G. hirsutum
GO:0019538	protein metabolic process	2988	136	105.52	0.00036	0.0114171	BP	6	G. hirsutum
GO:0071804	cellular potassium ion transport	29	6	1.02	0.00044	0.013024	BP	6	G. hirsutum
GO:0071805	potassium ion transmembrane transport	29	6	1.02	0.00044	0.013024	BP	6	G. hirsutum
GO:0006289	nucleotide-excision repair	12	4	0.42	0.00061	0.0174735	BP	6	G. hirsutum
GO:0010467	gene expression	2253	105	79.56	0.00102	0.028305	BP	6	G. hirsutum
GO:0010498	proteasomal protein catabolic process	7	3	0.25	0.00138	0.0357737	BP	6	G. hirsutum
GO:0043161	proteasome-mediated ubiquitin-dependent ...	7	3	0.25	0.00138	0.0357737	BP	6	G. hirsutum
GO:0044248	cellular catabolic process	289	21	10.21	0.00141	0.0357737	BP	6	G. hirsutum
GO:0043228	non-membrane-bounded organelle	643	47	23.64	1.5e-06	0.00017475	CC	6	G. hirsutum
GO:0043232	intracellular non-membrane-bounded organ...	643	47	23.64	1.5e-06	0.00017475	CC	6	G. hirsutum
GO:0005737	cytoplasm	1287	74	47.33	8.4e-06	0.0006524	CC	6	G. hirsutum
GO:0000808	origin recognition complex	10	5	0.37	1.4e-05	0.0008155	CC	6	G. hirsutum
GO:0032991	protein-containing complex	1267	71	46.59	3.7e-05	0.00147567	CC	6	G. hirsutum
GO:0044424	intracellular part	2481	118	91.23	3.8e-05	0.00147567	CC	6	G. hirsutum
GO:1990904	ribonucleoprotein complex	507	36	18.64	6.5e-05	0.00216357	CC	6	G. hirsutum
GO:0005840	ribosome	481	34	17.69	0.00012	0.003495	CC	6	G. hirsutum
GO:0016459	myosin complex	34	6	1.25	0.0013	0.0336556	CC	6	G. hirsutum
GO:0005622	intracellular	2903	126	106.75	0.002	0.0466	CC	6	G. hirsutum
GO:0044444	cytoplasmic part	931	50	34.23	0.00235	0.0497773	CC	6	G. hirsutum
GO:0005488	binding	10185	428	358.91	6.3e-11	3.9816e-08	MF	7	G. hirsutum
GO:1901363	heterocyclic compound binding	6363	295	224.22	4.3e-10	9.48e-08	MF	7	G. hirsutum
GO:0097159	organic cyclic compound binding	6366	295	224.33	4.5e-10	9.48e-08	MF	7	G. hirsutum
GO:0003677	DNA binding	1728	108	60.89	1.5e-09	2.00133e-07	MF	7	G. hirsutum
GO:0032559	adenyl ribonucleotide binding	2715	151	95.67	1.6e-09	2.00133e-07	MF	7	G. hirsutum
GO:0030554	adenyl nucleotide binding	2721	151	95.88	1.9e-09	2.00133e-07	MF	7	G. hirsutum
GO:0003676	nucleic acid binding	2686	148	94.65	4.8e-09	4.33371e-07	MF	7	G. hirsutum
GO:0005515	protein binding	3489	177	122.95	4.3e-08	3.397e-06	MF	7	G. hirsutum
GO:0005524	ATP binding	2457	134	86.58	6.4e-08	4.49422e-06	MF	7	G. hirsutum
GO:0008144	drug binding	2579	138	90.88	1.2e-07	7.584e-06	MF	7	G. hirsutum
GO:0032553	ribonucleotide binding	3072	155	108.25	6.6e-07	3.476e-05	MF	7	G. hirsutum
GO:0032555	purine ribonucleotide binding	3051	154	107.51	7.1e-07	3.476e-05	MF	7	G. hirsutum
GO:0000166	nucleotide binding	3380	167	119.11	7.7e-07	3.476e-05	MF	7	G. hirsutum
GO:1901265	nucleoside phosphate binding	3380	167	119.11	7.7e-07	3.476e-05	MF	7	G. hirsutum
GO:0017076	purine nucleotide binding	3063	154	107.94	9.1e-07	3.5945e-05	MF	7	G. hirsutum
GO:0097367	carbohydrate derivative binding	3088	155	108.82	9.1e-07	3.5945e-05	MF	7	G. hirsutum
GO:0004386	helicase activity	241	25	8.49	1.4e-06	5.20471e-05	MF	7	G. hirsutum
GO:0036094	small molecule binding	3543	172	124.85	1.5e-06	5.26667e-05	MF	7	G. hirsutum
GO:0043168	anion binding	3484	165	122.77	1.3e-05	0.000432421	MF	7	G. hirsutum
GO:0035639	purine ribonucleoside triphosphate bindi...	2793	137	98.42	1.7e-05	0.0005372	MF	7	G. hirsutum
GO:0043167	ion binding	5067	222	178.55	4.6e-05	0.00138438	MF	7	G. hirsutum
GO:0001871	pattern binding	9	4	0.32	0.00017	0.00447667	MF	7	G. hirsutum
GO:0030247	polysaccharide binding	9	4	0.32	0.00017	0.00447667	MF	7	G. hirsutum
GO:2001070	starch binding	9	4	0.32	0.00017	0.00447667	MF	7	G. hirsutum
GO:0016301	kinase activity	1577	82	55.57	0.0002	0.00486154	MF	7	G. hirsutum
GO:0004672	protein kinase activity	1435	76	50.57	0.0002	0.00486154	MF	7	G. hirsutum
GO:0016772	transferase activity, transferring phosp...	1865	92	65.72	0.00048	0.0112356	MF	7	G. hirsutum
GO:0016773	phosphotransferase activity, alcohol gro...	1584	80	55.82	0.00059	0.0133171	MF	7	G. hirsutum
GO:0008026	ATP-dependent helicase activity	134	13	4.72	0.0009	0.01896	MF	7	G. hirsutum
GO:0070035	purine NTP-dependent helicase activity	134	13	4.72	0.0009	0.01896	MF	7	G. hirsutum
GO:0060089	molecular transducer activity	88	10	3.1	0.00104	0.0212026	MF	7	G. hirsutum
GO:0004888	transmembrane signaling receptor activit...	25	5	0.88	0.00158	0.0302594	MF	7	G. hirsutum
GO:0038023	signaling receptor activity	25	5	0.88	0.00158	0.0302594	MF	7	G. hirsutum
GO:0006464	cellular protein modification process	1720	91	52.9	5.8e-08	2.5752e-05	BP	7	G. hirsutum
GO:0036211	protein modification process	1720	91	52.9	5.8e-08	2.5752e-05	BP	7	G. hirsutum
GO:0043412	macromolecule modification	1776	92	54.62	1.3e-07	3.848e-05	BP	7	G. hirsutum
GO:0044260	cellular macromolecule metabolic process	4378	180	134.65	4.1e-07	9.102e-05	BP	7	G. hirsutum
GO:0006351	transcription, DNA-templated	1415	75	43.52	1.1e-06	0.000152229	BP	7	G. hirsutum
GO:0097659	nucleic acid-templated transcription	1415	75	43.52	1.1e-06	0.000152229	BP	7	G. hirsutum
GO:0032774	RNA biosynthetic process	1417	75	43.58	1.2e-06	0.000152229	BP	7	G. hirsutum
GO:0006468	protein phosphorylation	1422	74	43.74	2.8e-06	0.0003108	BP	7	G. hirsutum
GO:0016070	RNA metabolic process	1719	85	52.87	3.3e-06	0.0003256	BP	7	G. hirsutum
GO:0043170	macromolecule metabolic process	5021	196	154.43	4e-06	0.0003552	BP	7	G. hirsutum
GO:0090304	nucleic acid metabolic process	1976	94	60.78	4.4e-06	0.0003552	BP	7	G. hirsutum
GO:0044238	primary metabolic process	6385	236	196.38	7.6e-06	0.0005624	BP	7	G. hirsutum
GO:0016310	phosphorylation	1522	76	46.81	9e-06	0.000614769	BP	7	G. hirsutum
GO:0034654	nucleobase-containing compound biosynthe...	1558	77	47.92	1.1e-05	0.000690667	BP	7	G. hirsutum
GO:0006355	regulation of transcription, DNA-templat...	1253	65	38.54	1.4e-05	0.000690667	BP	7	G. hirsutum
GO:0051252	regulation of RNA metabolic process	1253	65	38.54	1.4e-05	0.000690667	BP	7	G. hirsutum
GO:1903506	regulation of nucleic acid-templated tra...	1253	65	38.54	1.4e-05	0.000690667	BP	7	G. hirsutum
GO:2001141	regulation of RNA biosynthetic process	1253	65	38.54	1.4e-05	0.000690667	BP	7	G. hirsutum
GO:0019219	regulation of nucleobase-containing comp...	1257	65	38.66	1.6e-05	0.000747789	BP	7	G. hirsutum
GO:0044237	cellular metabolic process	5724	214	176.05	2.3e-05	0.000851	BP	7	G. hirsutum
GO:0009889	regulation of biosynthetic process	1272	65	39.12	2.3e-05	0.000851	BP	7	G. hirsutum
GO:0010556	regulation of macromolecule biosynthetic...	1272	65	39.12	2.3e-05	0.000851	BP	7	G. hirsutum
GO:0031326	regulation of cellular biosynthetic proc...	1272	65	39.12	2.3e-05	0.000851	BP	7	G. hirsutum
GO:2000112	regulation of cellular macromolecule bio...	1272	65	39.12	2.3e-05	0.000851	BP	7	G. hirsutum
GO:0010468	regulation of gene expression	1273	65	39.15	2.4e-05	0.00085248	BP	7	G. hirsutum
GO:0006793	phosphorus metabolic process	1801	84	55.39	3.6e-05	0.0010545	BP	7	G. hirsutum
GO:0006796	phosphate-containing compound metabolic ...	1801	84	55.39	3.6e-05	0.0010545	BP	7	G. hirsutum
GO:0031323	regulation of cellular metabolic process	1291	65	39.71	3.7e-05	0.0010545	BP	7	G. hirsutum
GO:0051171	regulation of nitrogen compound metaboli...	1291	65	39.71	3.7e-05	0.0010545	BP	7	G. hirsutum
GO:0080090	regulation of primary metabolic process	1291	65	39.71	3.7e-05	0.0010545	BP	7	G. hirsutum
GO:0006807	nitrogen compound metabolic process	5431	204	167.04	3.8e-05	0.0010545	BP	7	G. hirsutum
GO:0071704	organic substance metabolic process	6565	238	201.92	3.8e-05	0.0010545	BP	7	G. hirsutum
GO:0060255	regulation of macromolecule metabolic pr...	1295	65	39.83	4e-05	0.00107636	BP	7	G. hirsutum
GO:0019222	regulation of metabolic process	1297	65	39.89	4.2e-05	0.00109694	BP	7	G. hirsutum
GO:0006139	nucleobase-containing compound metabolic...	2248	99	69.14	6.1e-05	0.00154766	BP	7	G. hirsutum
GO:0019438	aromatic compound biosynthetic process	1650	77	50.75	8.4e-05	0.002072	BP	7	G. hirsutum
GO:0018130	heterocycle biosynthetic process	1657	77	50.96	9.6e-05	0.002304	BP	7	G. hirsutum
GO:1901362	organic cyclic compound biosynthetic pro...	1778	79	54.69	0.00033	0.00771158	BP	7	G. hirsutum
GO:0046483	heterocycle metabolic process	2352	99	72.34	0.00035	0.00796923	BP	7	G. hirsutum
GO:0006725	cellular aromatic compound metabolic pro...	2353	99	72.37	0.00036	0.007992	BP	7	G. hirsutum
GO:0009987	cellular process	6807	240	209.36	0.00037	0.00801366	BP	7	G. hirsutum
GO:0009314	response to radiation	47	7	1.45	0.00053	0.0109451	BP	7	G. hirsutum
GO:0009416	response to light stimulus	47	7	1.45	0.00053	0.0109451	BP	7	G. hirsutum
GO:1901360	organic cyclic compound metabolic proces...	2464	101	75.79	0.00079	0.0159436	BP	7	G. hirsutum
GO:0016569	covalent chromatin modification	26	5	0.8	0.00103	0.0198835	BP	7	G. hirsutum
GO:0016570	histone modification	26	5	0.8	0.00103	0.0198835	BP	7	G. hirsutum
GO:0009628	response to abiotic stimulus	53	7	1.63	0.00112	0.0211609	BP	7	G. hirsutum
GO:0051276	chromosome organization	75	8	2.31	0.00207	0.038295	BP	7	G. hirsutum
GO:0005634	nucleus	883	52	25.8	1.1e-07	2.563e-05	CC	7	G. hirsutum
GO:0043231	intracellular membrane-bounded organelle	1205	57	35.21	3.5e-05	0.0040775	CC	7	G. hirsutum
GO:0043227	membrane-bounded organelle	1226	57	35.82	5.9e-05	0.00458233	CC	7	G. hirsutum
GO:0004672	protein kinase activity	1435	74	42.15	1.1e-06	0.0004424	MF	8	G. hirsutum
GO:0016301	kinase activity	1577	79	46.33	1.4e-06	0.0004424	MF	8	G. hirsutum
GO:0016773	phosphotransferase activity, alcohol gro...	1584	77	46.53	6e-06	0.0009796	MF	8	G. hirsutum
GO:0140096	catalytic activity, acting on a protein	2169	98	63.72	6.2e-06	0.0009796	MF	8	G. hirsutum
GO:0032559	adenyl ribonucleotide binding	2715	114	79.76	2.7e-05	0.00316	MF	8	G. hirsutum
GO:0030554	adenyl nucleotide binding	2721	114	79.93	3e-05	0.00316	MF	8	G. hirsutum
GO:0005524	ATP binding	2457	104	72.18	5e-05	0.00451429	MF	8	G. hirsutum
GO:0004650	polygalacturonase activity	48	8	1.41	7e-05	0.00553	MF	8	G. hirsutum
GO:0004312	fatty acid synthase activity	17	5	0.5	9.9e-05	0.0062568	MF	8	G. hirsutum
GO:0004315	3-oxoacyl-[acyl-carrier-protein] synthas...	17	5	0.5	9.9e-05	0.0062568	MF	8	G. hirsutum
GO:0016772	transferase activity, transferring phosp...	1865	82	54.79	0.00011	0.00632	MF	8	G. hirsutum
GO:0008144	drug binding	2579	106	75.76	0.00014	0.00737333	MF	8	G. hirsutum
GO:0032555	purine ribonucleotide binding	3051	120	89.63	0.00028	0.0136123	MF	8	G. hirsutum
GO:0017076	purine nucleotide binding	3063	120	89.98	0.00033	0.0148971	MF	8	G. hirsutum
GO:0032553	ribonucleotide binding	3072	120	90.24	0.00037	0.0155893	MF	8	G. hirsutum
GO:0097367	carbohydrate derivative binding	3088	120	90.71	0.00045	0.017775	MF	8	G. hirsutum
GO:0035639	purine ribonucleoside triphosphate bindi...	2793	110	82.05	0.00052	0.0193318	MF	8	G. hirsutum
GO:0004553	hydrolase activity, hydrolyzing O-glycos...	370	23	10.87	0.00062	0.021488	MF	8	G. hirsutum
GO:0016740	transferase activity	3119	120	91.62	0.00067	0.021488	MF	8	G. hirsutum
GO:0042802	identical protein binding	51	7	1.5	0.00068	0.021488	MF	8	G. hirsutum
GO:0016798	hydrolase activity, acting on glycosyl b...	387	23	11.37	0.00114	0.0343086	MF	8	G. hirsutum
GO:1901363	heterocyclic compound binding	6363	218	186.92	0.00171	0.0483617	MF	8	G. hirsutum
GO:0097159	organic cyclic compound binding	6366	218	187.01	0.00176	0.0483617	MF	8	G. hirsutum
GO:0071704	organic substance metabolic process	6565	245	206.52	1.5e-05	0.006808	BP	8	G. hirsutum
GO:0044238	primary metabolic process	6385	239	200.86	2e-05	0.006808	BP	8	G. hirsutum
GO:0006468	protein phosphorylation	1422	72	44.73	2.3e-05	0.006808	BP	8	G. hirsutum
GO:0016310	phosphorylation	1522	74	47.88	6.7e-05	0.014874	BP	8	G. hirsutum
GO:0006464	cellular protein modification process	1720	80	54.11	0.00014	0.02072	BP	8	G. hirsutum
GO:0036211	protein modification process	1720	80	54.11	0.00014	0.02072	BP	8	G. hirsutum
GO:0043412	macromolecule modification	1776	81	55.87	0.00025	0.0317143	BP	8	G. hirsutum
GO:0043086	negative regulation of catalytic activit...	45	7	1.42	0.00047	0.0463733	BP	8	G. hirsutum
GO:0044092	negative regulation of molecular functio...	45	7	1.42	0.00047	0.0463733	BP	8	G. hirsutum
GO:0016717	oxidoreductase activity, acting on paire...	17	5	0.39	3e-05	0.01896	MF	9	G. hirsutum
GO:0031323	regulation of cellular metabolic process	1291	52	30.88	0.0001	0.020128	BP	9	G. hirsutum
GO:0051171	regulation of nitrogen compound metaboli...	1291	52	30.88	0.0001	0.020128	BP	9	G. hirsutum
GO:0080090	regulation of primary metabolic process	1291	52	30.88	0.0001	0.020128	BP	9	G. hirsutum
GO:0060255	regulation of macromolecule metabolic pr...	1295	52	30.98	0.00011	0.020128	BP	9	G. hirsutum
GO:0019222	regulation of metabolic process	1297	52	31.03	0.00012	0.020128	BP	9	G. hirsutum
GO:0065007	biological regulation	1947	70	46.58	0.00019	0.020128	BP	9	G. hirsutum
GO:0019219	regulation of nucleobase-containing comp...	1257	50	30.07	0.00019	0.020128	BP	9	G. hirsutum
GO:0009889	regulation of biosynthetic process	1272	50	30.43	0.00026	0.020128	BP	9	G. hirsutum
GO:0010556	regulation of macromolecule biosynthetic...	1272	50	30.43	0.00026	0.020128	BP	9	G. hirsutum
GO:0031326	regulation of cellular biosynthetic proc...	1272	50	30.43	0.00026	0.020128	BP	9	G. hirsutum
GO:2000112	regulation of cellular macromolecule bio...	1272	50	30.43	0.00026	0.020128	BP	9	G. hirsutum
GO:0006355	regulation of transcription, DNA-templat...	1253	49	29.97	0.00034	0.020128	BP	9	G. hirsutum
GO:0051252	regulation of RNA metabolic process	1253	49	29.97	0.00034	0.020128	BP	9	G. hirsutum
GO:1903506	regulation of nucleic acid-templated tra...	1253	49	29.97	0.00034	0.020128	BP	9	G. hirsutum
GO:2001141	regulation of RNA biosynthetic process	1253	49	29.97	0.00034	0.020128	BP	9	G. hirsutum
GO:0010468	regulation of gene expression	1273	49	30.45	0.00049	0.027195	BP	9	G. hirsutum
GO:0050789	regulation of biological process	1840	64	44.02	0.00095	0.0496235	BP	9	G. hirsutum
GO:0005811	lipid droplet	11	7	0.24	6.5e-10	7.5725e-08	CC	9	G. hirsutum
GO:0012511	monolayer-surrounded lipid storage body	11	7	0.24	6.5e-10	7.5725e-08	CC	9	G. hirsutum
GO:0005488	binding	10185	327	273.24	5.8e-09	3.6656e-06	MF	10	G. hirsutum
GO:0043531	ADP binding	272	24	7.3	3.4e-07	8.374e-05	MF	10	G. hirsutum
GO:0032559	adenyl ribonucleotide binding	2715	113	72.84	4.7e-07	8.374e-05	MF	10	G. hirsutum
GO:0030554	adenyl nucleotide binding	2721	113	73	5.3e-07	8.374e-05	MF	10	G. hirsutum
GO:0032555	purine ribonucleotide binding	3051	120	81.85	3.5e-06	0.0004424	MF	10	G. hirsutum
GO:0017076	purine nucleotide binding	3063	120	82.17	4.3e-06	0.000451429	MF	10	G. hirsutum
GO:0032553	ribonucleotide binding	3072	120	82.41	5e-06	0.000451429	MF	10	G. hirsutum
GO:0097367	carbohydrate derivative binding	3088	120	82.84	6.5e-06	0.0005135	MF	10	G. hirsutum
GO:0000166	nucleotide binding	3380	125	90.68	4.4e-05	0.0027808	MF	10	G. hirsutum
GO:1901265	nucleoside phosphate binding	3380	125	90.68	4.4e-05	0.0027808	MF	10	G. hirsutum
GO:0043167	ion binding	5067	173	135.93	7.4e-05	0.00405533	MF	10	G. hirsutum
GO:0005515	protein binding	3489	127	93.6	7.7e-05	0.00405533	MF	10	G. hirsutum
GO:0004386	helicase activity	241	18	6.47	9.2e-05	0.00447262	MF	10	G. hirsutum
GO:0043168	anion binding	3484	126	93.47	0.00011	0.00474	MF	10	G. hirsutum
GO:1901363	heterocyclic compound binding	6363	208	170.7	0.00012	0.00474	MF	10	G. hirsutum
GO:0097159	organic cyclic compound binding	6366	208	170.78	0.00012	0.00474	MF	10	G. hirsutum
GO:0036094	small molecule binding	3543	127	95.05	0.00016	0.00594824	MF	10	G. hirsutum
GO:0003676	nucleic acid binding	2686	99	72.06	0.00042	0.0139705	MF	10	G. hirsutum
GO:0008270	zinc ion binding	740	36	19.85	0.00042	0.0139705	MF	10	G. hirsutum
GO:0003909	DNA ligase activity	7	3	0.19	0.00062	0.018659	MF	10	G. hirsutum
GO:0003910	DNA ligase (ATP) activity	7	3	0.19	0.00062	0.018659	MF	10	G. hirsutum
GO:0016779	nucleotidyltransferase activity	193	14	5.18	0.00073	0.0209709	MF	10	G. hirsutum
GO:0004652	polynucleotide adenylyltransferase activ...	8	3	0.21	0.00097	0.02528	MF	10	G. hirsutum
GO:0016886	ligase activity, forming phosphoric este...	8	3	0.21	0.00097	0.02528	MF	10	G. hirsutum
GO:0005524	ATP binding	2457	90	65.91	0.001	0.02528	MF	10	G. hirsutum
GO:0140097	catalytic activity, acting on DNA	139	11	3.73	0.00131	0.0318431	MF	10	G. hirsutum
GO:0140101	catalytic activity, acting on a tRNA	121	10	3.25	0.00155	0.0362815	MF	10	G. hirsutum
GO:0008144	drug binding	2579	92	69.19	0.002	0.0446759	MF	10	G. hirsutum
GO:0004518	nuclease activity	105	9	2.82	0.00205	0.0446759	MF	10	G. hirsutum
GO:0006259	DNA metabolic process	270	18	6.01	3.4e-05	0.00555	BP	10	G. hirsutum
GO:0006281	DNA repair	175	14	3.9	3.6e-05	0.00555	BP	10	G. hirsutum
GO:0006974	cellular response to DNA damage stimulus	176	14	3.92	3.8e-05	0.00555	BP	10	G. hirsutum
GO:0033554	cellular response to stress	176	14	3.92	3.8e-05	0.00555	BP	10	G. hirsutum
GO:0046483	heterocycle metabolic process	2352	79	52.35	4.5e-05	0.00555	BP	10	G. hirsutum
GO:0043170	macromolecule metabolic process	5021	143	111.75	4.6e-05	0.00555	BP	10	G. hirsutum
GO:0006725	cellular aromatic compound metabolic pro...	2353	79	52.37	4.6e-05	0.00555	BP	10	G. hirsutum
GO:0090304	nucleic acid metabolic process	1976	69	43.98	5e-05	0.00555	BP	10	G. hirsutum
GO:0006399	tRNA metabolic process	161	13	3.58	6.2e-05	0.00611733	BP	10	G. hirsutum
GO:0006139	nucleobase-containing compound metabolic...	2248	75	50.03	9.7e-05	0.0086136	BP	10	G. hirsutum
GO:1901360	organic cyclic compound metabolic proces...	2464	80	54.84	0.00013	0.01036	BP	10	G. hirsutum
GO:0006807	nitrogen compound metabolic process	5431	150	120.88	0.00014	0.01036	BP	10	G. hirsutum
GO:0034660	ncRNA metabolic process	187	13	4.16	0.00028	0.0191262	BP	10	G. hirsutum
GO:0006396	RNA processing	192	13	4.27	0.00036	0.0228343	BP	10	G. hirsutum
GO:0043631	RNA polyadenylation	8	3	0.18	0.00056	0.033152	BP	10	G. hirsutum
GO:0016071	mRNA metabolic process	33	5	0.73	0.00075	0.0402212	BP	10	G. hirsutum
GO:0071704	organic substance metabolic process	6565	171	146.12	0.00077	0.0402212	BP	10	G. hirsutum
GO:0044238	primary metabolic process	6385	167	142.11	0.00082	0.0404533	BP	10	G. hirsutum
GO:0006418	tRNA aminoacylation for protein translat...	73	7	1.62	0.00116	0.04736	BP	10	G. hirsutum
GO:0043038	amino acid activation	74	7	1.65	0.00126	0.04736	BP	10	G. hirsutum
GO:0043039	tRNA aminoacylation	74	7	1.65	0.00126	0.04736	BP	10	G. hirsutum
GO:0009719	response to endogenous stimulus	37	5	0.82	0.00128	0.04736	BP	10	G. hirsutum
GO:0009725	response to hormone	37	5	0.82	0.00128	0.04736	BP	10	G. hirsutum
GO:0010033	response to organic substance	37	5	0.82	0.00128	0.04736	BP	10	G. hirsutum
GO:0006310	DNA recombination	75	7	1.67	0.00136	0.0483072	BP	10	G. hirsutum
GO:0016881	acid-amino acid ligase activity	113	13	2.21	3.2e-07	0.00020224	MF	12	G. hirsutum
GO:0033218	amide binding	24	6	0.47	5.3e-06	0.0016748	MF	12	G. hirsutum
GO:0016879	ligase activity, forming carbon-nitrogen...	171	13	3.35	3.2e-05	0.00674133	MF	12	G. hirsutum
GO:0003743	translation initiation factor activity	46	6	0.9	0.00026	0.025912	MF	12	G. hirsutum
GO:0001883	purine nucleoside binding	340	17	6.65	0.0004	0.025912	MF	12	G. hirsutum
GO:0005525	GTP binding	340	17	6.65	0.0004	0.025912	MF	12	G. hirsutum
GO:0032549	ribonucleoside binding	340	17	6.65	0.0004	0.025912	MF	12	G. hirsutum
GO:0032550	purine ribonucleoside binding	340	17	6.65	0.0004	0.025912	MF	12	G. hirsutum
GO:0032561	guanyl ribonucleotide binding	340	17	6.65	0.0004	0.025912	MF	12	G. hirsutum
GO:0001882	nucleoside binding	341	17	6.67	0.00041	0.025912	MF	12	G. hirsutum
GO:0019001	guanyl nucleotide binding	346	17	6.77	0.00049	0.0281527	MF	12	G. hirsutum
GO:0008135	translation factor activity, RNA binding	76	7	1.49	0.00071	0.0361143	MF	12	G. hirsutum
GO:0000062	fatty-acyl-CoA binding	10	3	0.2	0.0008	0.0361143	MF	12	G. hirsutum
GO:1901567	fatty acid derivative binding	10	3	0.2	0.0008	0.0361143	MF	12	G. hirsutum
GO:0019205	nucleobase-containing compound kinase ac...	24	4	0.47	0.00112	0.0471893	MF	12	G. hirsutum
GO:0015988	energy coupled proton transmembrane tran...	55	9	1.12	1.5e-06	0.0002664	BP	12	G. hirsutum
GO:0015991	ATP hydrolysis coupled proton transport	55	9	1.12	1.5e-06	0.0002664	BP	12	G. hirsutum
GO:0090662	ATP hydrolysis coupled transmembrane tra...	55	9	1.12	1.5e-06	0.0002664	BP	12	G. hirsutum
GO:0099131	ATP hydrolysis coupled ion transmembrane...	55	9	1.12	1.5e-06	0.0002664	BP	12	G. hirsutum
GO:0099132	ATP hydrolysis coupled cation transmembr...	55	9	1.12	1.5e-06	0.0002664	BP	12	G. hirsutum
GO:0022607	cellular component assembly	112	11	2.29	1.7e-05	0.002516	BP	12	G. hirsutum
GO:0007264	small GTPase mediated signal transductio...	185	14	3.78	2.6e-05	0.00329829	BP	12	G. hirsutum
GO:0000045	autophagosome assembly	12	4	0.25	7.4e-05	0.00597382	BP	12	G. hirsutum
GO:0007033	vacuole organization	12	4	0.25	7.4e-05	0.00597382	BP	12	G. hirsutum
GO:0016236	macroautophagy	12	4	0.25	7.4e-05	0.00597382	BP	12	G. hirsutum
GO:1905037	autophagosome organization	12	4	0.25	7.4e-05	0.00597382	BP	12	G. hirsutum
GO:1902600	proton transmembrane transport	93	9	1.9	0.00011	0.00814	BP	12	G. hirsutum
GO:0006914	autophagy	14	4	0.29	0.00014	0.008288	BP	12	G. hirsutum
GO:0061919	process utilizing autophagic mechanism	14	4	0.29	0.00014	0.008288	BP	12	G. hirsutum
GO:0070925	organelle assembly	14	4	0.29	0.00014	0.008288	BP	12	G. hirsutum
GO:0009056	catabolic process	331	18	6.76	0.00015	0.008325	BP	12	G. hirsutum
GO:0006413	translational initiation	44	6	0.9	0.00025	0.0130588	BP	12	G. hirsutum
GO:0030163	protein catabolic process	151	11	3.08	0.00027	0.01332	BP	12	G. hirsutum
GO:0044248	cellular catabolic process	289	16	5.9	0.00029	0.0135537	BP	12	G. hirsutum
GO:1901565	organonitrogen compound catabolic proces...	186	12	3.8	0.00043	0.01739	BP	12	G. hirsutum
GO:0034220	ion transmembrane transport	136	10	2.78	0.00047	0.01739	BP	12	G. hirsutum
GO:0098655	cation transmembrane transport	136	10	2.78	0.00047	0.01739	BP	12	G. hirsutum
GO:0098660	inorganic ion transmembrane transport	136	10	2.78	0.00047	0.01739	BP	12	G. hirsutum
GO:0098662	inorganic cation transmembrane transport	136	10	2.78	0.00047	0.01739	BP	12	G. hirsutum
GO:0044085	cellular component biogenesis	163	11	3.33	0.00051	0.0181152	BP	12	G. hirsutum
GO:0035556	intracellular signal transduction	288	15	5.88	0.00084	0.0286892	BP	12	G. hirsutum
GO:0065008	regulation of biological quality	202	12	4.12	0.0009	0.0296	BP	12	G. hirsutum
GO:0007186	G protein-coupled receptor signaling pat...	58	6	1.18	0.00113	0.0358371	BP	12	G. hirsutum
GO:0015672	monovalent inorganic cation transport	154	10	3.14	0.00122	0.0373572	BP	12	G. hirsutum
GO:0006621	protein retention in ER lumen	12	3	0.25	0.00161	0.0396	BP	12	G. hirsutum
GO:0032507	maintenance of protein location in cell	12	3	0.25	0.00161	0.0396	BP	12	G. hirsutum
GO:0035437	maintenance of protein localization in e...	12	3	0.25	0.00161	0.0396	BP	12	G. hirsutum
GO:0045185	maintenance of protein location	12	3	0.25	0.00161	0.0396	BP	12	G. hirsutum
GO:0051235	maintenance of location	12	3	0.25	0.00161	0.0396	BP	12	G. hirsutum
GO:0051651	maintenance of location in cell	12	3	0.25	0.00161	0.0396	BP	12	G. hirsutum
GO:0072595	maintenance of protein localization in o...	12	3	0.25	0.00161	0.0396	BP	12	G. hirsutum
GO:0009057	macromolecule catabolic process	188	11	3.84	0.00165	0.0396	BP	12	G. hirsutum
GO:0016192	vesicle-mediated transport	191	11	3.9	0.00187	0.0436989	BP	12	G. hirsutum
GO:0005543	phospholipid binding	78	10	1.56	3.4e-06	0.0021488	MF	14	G. hirsutum
GO:0008289	lipid binding	90	10	1.8	1.2e-05	0.003792	MF	14	G. hirsutum
GO:0008565	protein transporter activity	42	7	0.84	1.8e-05	0.003792	MF	14	G. hirsutum
GO:0046933	proton-transporting ATP synthase activit...	35	6	0.7	6.1e-05	0.009638	MF	14	G. hirsutum
GO:0005086	ARF guanyl-nucleotide exchange factor ac...	13	4	0.26	9.7e-05	0.0122608	MF	14	G. hirsutum
GO:0019829	cation-transporting ATPase activity	45	6	0.9	0.00026	0.0182578	MF	14	G. hirsutum
GO:0022853	active ion transmembrane transporter act...	45	6	0.9	0.00026	0.0182578	MF	14	G. hirsutum
GO:0042625	ATPase coupled ion transmembrane transpo...	45	6	0.9	0.00026	0.0182578	MF	14	G. hirsutum
GO:0044769	ATPase activity, coupled to transmembran...	45	6	0.9	0.00026	0.0182578	MF	14	G. hirsutum
GO:0016616	oxidoreductase activity, acting on the C...	270	15	5.4	0.00037	0.023384	MF	14	G. hirsutum
GO:0016614	oxidoreductase activity, acting on CH-OH...	287	15	5.74	0.00069	0.0396436	MF	14	G. hirsutum
GO:0006886	intracellular protein transport	190	34	3.75	2.7e-23	1.03008e-20	BP	14	G. hirsutum
GO:0046907	intracellular transport	208	35	4.1	4.9e-23	1.03008e-20	BP	14	G. hirsutum
GO:0051649	establishment of localization in cell	208	35	4.1	4.9e-23	1.03008e-20	BP	14	G. hirsutum
GO:0034613	cellular protein localization	209	35	4.12	5.8e-23	1.03008e-20	BP	14	G. hirsutum
GO:0070727	cellular macromolecule localization	209	35	4.12	5.8e-23	1.03008e-20	BP	14	G. hirsutum
GO:0051641	cellular localization	242	37	4.77	8.3e-23	1.2284e-20	BP	14	G. hirsutum
GO:0015031	protein transport	235	34	4.63	3.3e-20	4.18629e-18	BP	14	G. hirsutum
GO:0008104	protein localization	258	35	5.09	7.5e-20	8.325e-18	BP	14	G. hirsutum
GO:0045184	establishment of protein localization	242	34	4.77	8.5e-20	8.38667e-18	BP	14	G. hirsutum
GO:0033036	macromolecule localization	266	35	5.24	2.1e-19	1.8648e-17	BP	14	G. hirsutum
GO:0016192	vesicle-mediated transport	191	28	3.77	6.2e-17	5.00509e-15	BP	14	G. hirsutum
GO:0015833	peptide transport	302	34	5.95	9.6e-17	6.55754e-15	BP	14	G. hirsutum
GO:0042886	amide transport	302	34	5.95	9.6e-17	6.55754e-15	BP	14	G. hirsutum
GO:0071705	nitrogen compound transport	304	34	5.99	1.2e-16	7.61143e-15	BP	14	G. hirsutum
GO:0071702	organic substance transport	329	35	6.49	1.9e-16	1.1248e-14	BP	14	G. hirsutum
GO:0051179	localization	1472	62	29.02	2.5e-09	1.3875e-07	BP	14	G. hirsutum
GO:0006810	transport	1449	61	28.57	3.6e-09	1.88047e-07	BP	14	G. hirsutum
GO:0051234	establishment of localization	1456	61	28.71	4.3e-09	2.12133e-07	BP	14	G. hirsutum
GO:0017144	drug metabolic process	222	16	4.38	8e-06	0.000373895	BP	14	G. hirsutum
GO:0046034	ATP metabolic process	127	11	2.5	4.1e-05	0.0018204	BP	14	G. hirsutum
GO:0009126	purine nucleoside monophosphate metaboli...	136	11	2.68	7.7e-05	0.00237671	BP	14	G. hirsutum
GO:0009144	purine nucleoside triphosphate metabolic...	136	11	2.68	7.7e-05	0.00237671	BP	14	G. hirsutum
GO:0009167	purine ribonucleoside monophosphate meta...	136	11	2.68	7.7e-05	0.00237671	BP	14	G. hirsutum
GO:0009199	ribonucleoside triphosphate metabolic pr...	136	11	2.68	7.7e-05	0.00237671	BP	14	G. hirsutum
GO:0009205	purine ribonucleoside triphosphate metab...	136	11	2.68	7.7e-05	0.00237671	BP	14	G. hirsutum
GO:0009141	nucleoside triphosphate metabolic proces...	137	11	2.7	8.2e-05	0.00237671	BP	14	G. hirsutum
GO:0006754	ATP biosynthetic process	93	9	1.83	8.8e-05	0.00237671	BP	14	G. hirsutum
GO:1902600	proton transmembrane transport	93	9	1.83	8.8e-05	0.00237671	BP	14	G. hirsutum
GO:0007265	Ras protein signal transduction	13	4	0.26	9.1e-05	0.00237671	BP	14	G. hirsutum
GO:0032011	ARF protein signal transduction	13	4	0.26	9.1e-05	0.00237671	BP	14	G. hirsutum
GO:0032012	regulation of ARF protein signal transdu...	13	4	0.26	9.1e-05	0.00237671	BP	14	G. hirsutum
GO:0046578	regulation of Ras protein signal transdu...	13	4	0.26	9.1e-05	0.00237671	BP	14	G. hirsutum
GO:0051056	regulation of small GTPase mediated sign...	13	4	0.26	9.1e-05	0.00237671	BP	14	G. hirsutum
GO:1902531	regulation of intracellular signal trans...	13	4	0.26	9.1e-05	0.00237671	BP	14	G. hirsutum
GO:0009161	ribonucleoside monophosphate metabolic p...	139	11	2.74	9.4e-05	0.00238491	BP	14	G. hirsutum
GO:0009123	nucleoside monophosphate metabolic proce...	142	11	2.8	0.00011	0.00271333	BP	14	G. hirsutum
GO:0009142	nucleoside triphosphate biosynthetic pro...	99	9	1.95	0.00014	0.003108	BP	14	G. hirsutum
GO:0009145	purine nucleoside triphosphate biosynthe...	99	9	1.95	0.00014	0.003108	BP	14	G. hirsutum
GO:0009201	ribonucleoside triphosphate biosynthetic...	99	9	1.95	0.00014	0.003108	BP	14	G. hirsutum
GO:0009206	purine ribonucleoside triphosphate biosy...	99	9	1.95	0.00014	0.003108	BP	14	G. hirsutum
GO:0009127	purine nucleoside monophosphate biosynth...	102	9	2.01	0.00018	0.00380571	BP	14	G. hirsutum
GO:0009168	purine ribonucleoside monophosphate bios...	102	9	2.01	0.00018	0.00380571	BP	14	G. hirsutum
GO:0009156	ribonucleoside monophosphate biosyntheti...	105	9	2.07	0.00022	0.00454326	BP	14	G. hirsutum
GO:0033365	protein localization to organelle	45	6	0.89	0.00024	0.00482609	BP	14	G. hirsutum
GO:0006099	tricarboxylic acid cycle	7	3	0.14	0.00025	0.00482609	BP	14	G. hirsutum
GO:0006101	citrate metabolic process	7	3	0.14	0.00025	0.00482609	BP	14	G. hirsutum
GO:0009124	nucleoside monophosphate biosynthetic pr...	108	9	2.13	0.00028	0.00529021	BP	14	G. hirsutum
GO:0009152	purine ribonucleotide biosynthetic proce...	110	9	2.17	0.00032	0.00592	BP	14	G. hirsutum
GO:0009150	purine ribonucleotide metabolic process	162	11	3.19	0.00036	0.00652408	BP	14	G. hirsutum
GO:0009260	ribonucleotide biosynthetic process	113	9	2.23	0.00039	0.00666	BP	14	G. hirsutum
GO:0046390	ribose phosphate biosynthetic process	113	9	2.23	0.00039	0.00666	BP	14	G. hirsutum
GO:0016999	antibiotic metabolic process	8	3	0.16	0.00039	0.00666	BP	14	G. hirsutum
GO:0006164	purine nucleotide biosynthetic process	114	9	2.25	0.00041	0.00686943	BP	14	G. hirsutum
GO:0009259	ribonucleotide metabolic process	165	11	3.25	0.00042	0.00690667	BP	14	G. hirsutum
GO:0072594	establishment of protein localization to...	33	5	0.65	0.00043	0.00694255	BP	14	G. hirsutum
GO:0006163	purine nucleotide metabolic process	166	11	3.27	0.00044	0.00697714	BP	14	G. hirsutum
GO:0072522	purine-containing compound biosynthetic ...	116	9	2.29	0.00047	0.00732211	BP	14	G. hirsutum
GO:0072521	purine-containing compound metabolic pro...	168	11	3.31	0.00049	0.00750207	BP	14	G. hirsutum
GO:0009060	aerobic respiration	9	3	0.18	0.00058	0.00872949	BP	14	G. hirsutum
GO:0009966	regulation of signal transduction	21	4	0.41	0.00068	0.00941015	BP	14	G. hirsutum
GO:0010646	regulation of cell communication	21	4	0.41	0.00068	0.00941015	BP	14	G. hirsutum
GO:0023051	regulation of signaling	21	4	0.41	0.00068	0.00941015	BP	14	G. hirsutum
GO:0015988	energy coupled proton transmembrane tran...	55	6	1.08	0.00071	0.00941015	BP	14	G. hirsutum
GO:0015991	ATP hydrolysis coupled proton transport	55	6	1.08	0.00071	0.00941015	BP	14	G. hirsutum
GO:0090662	ATP hydrolysis coupled transmembrane tra...	55	6	1.08	0.00071	0.00941015	BP	14	G. hirsutum
GO:0099131	ATP hydrolysis coupled ion transmembrane...	55	6	1.08	0.00071	0.00941015	BP	14	G. hirsutum
GO:0099132	ATP hydrolysis coupled cation transmembr...	55	6	1.08	0.00071	0.00941015	BP	14	G. hirsutum
GO:0048583	regulation of response to stimulus	22	4	0.43	0.00081	0.0101133	BP	14	G. hirsutum
GO:0006606	protein import into nucleus	10	3	0.2	0.00082	0.0101133	BP	14	G. hirsutum
GO:0034504	protein localization to nucleus	10	3	0.2	0.00082	0.0101133	BP	14	G. hirsutum
GO:0051170	import into nucleus	10	3	0.2	0.00082	0.0101133	BP	14	G. hirsutum
GO:0072350	tricarboxylic acid metabolic process	10	3	0.2	0.00082	0.0101133	BP	14	G. hirsutum
GO:0015672	monovalent inorganic cation transport	154	10	3.04	0.00094	0.0114345	BP	14	G. hirsutum
GO:0006913	nucleocytoplasmic transport	11	3	0.22	0.00111	0.0131424	BP	14	G. hirsutum
GO:0051169	nuclear transport	11	3	0.22	0.00111	0.0131424	BP	14	G. hirsutum
GO:0017038	protein import	24	4	0.47	0.00115	0.0134368	BP	14	G. hirsutum
GO:0009165	nucleotide biosynthetic process	134	9	2.64	0.00133	0.0152554	BP	14	G. hirsutum
GO:0048193	Golgi vesicle transport	42	5	0.83	0.00134	0.0152554	BP	14	G. hirsutum
GO:0019693	ribose phosphate metabolic process	190	11	3.75	0.00136	0.0152871	BP	14	G. hirsutum
GO:0034220	ion transmembrane transport	136	9	2.68	0.00147	0.0157272	BP	14	G. hirsutum
GO:0098655	cation transmembrane transport	136	9	2.68	0.00147	0.0157272	BP	14	G. hirsutum
GO:0098660	inorganic ion transmembrane transport	136	9	2.68	0.00147	0.0157272	BP	14	G. hirsutum
GO:0098662	inorganic cation transmembrane transport	136	9	2.68	0.00147	0.0157272	BP	14	G. hirsutum
GO:1901293	nucleoside phosphate biosynthetic proces...	138	9	2.72	0.00163	0.0172314	BP	14	G. hirsutum
GO:0045226	extracellular polysaccharide biosyntheti...	46	5	0.91	0.00202	0.0208577	BP	14	G. hirsutum
GO:0046379	extracellular polysaccharide metabolic p...	46	5	0.91	0.00202	0.0208577	BP	14	G. hirsutum
GO:0044270	cellular nitrogen compound catabolic pro...	69	6	1.36	0.00234	0.0238841	BP	14	G. hirsutum
GO:0019439	aromatic compound catabolic process	71	6	1.4	0.00271	0.0273464	BP	14	G. hirsutum
GO:0046700	heterocycle catabolic process	72	6	1.42	0.0029	0.0289348	BP	14	G. hirsutum
GO:1901361	organic cyclic compound catabolic proces...	73	6	1.44	0.00311	0.0305433	BP	14	G. hirsutum
GO:0006091	generation of precursor metabolites and ...	124	8	2.44	0.00313	0.0305433	BP	14	G. hirsutum
GO:0009117	nucleotide metabolic process	212	11	4.18	0.00321	0.0306844	BP	14	G. hirsutum
GO:0006096	glycolytic process	52	5	1.03	0.00349	0.0306844	BP	14	G. hirsutum
GO:0006757	ATP generation from ADP	52	5	1.03	0.00349	0.0306844	BP	14	G. hirsutum
GO:0009135	purine nucleoside diphosphate metabolic ...	52	5	1.03	0.00349	0.0306844	BP	14	G. hirsutum
GO:0009166	nucleotide catabolic process	52	5	1.03	0.00349	0.0306844	BP	14	G. hirsutum
GO:0009179	purine ribonucleoside diphosphate metabo...	52	5	1.03	0.00349	0.0306844	BP	14	G. hirsutum
GO:0009185	ribonucleoside diphosphate metabolic pro...	52	5	1.03	0.00349	0.0306844	BP	14	G. hirsutum
GO:0042866	pyruvate biosynthetic process	52	5	1.03	0.00349	0.0306844	BP	14	G. hirsutum
GO:0046031	ADP metabolic process	52	5	1.03	0.00349	0.0306844	BP	14	G. hirsutum
GO:1901292	nucleoside phosphate catabolic process	52	5	1.03	0.00349	0.0306844	BP	14	G. hirsutum
GO:0006753	nucleoside phosphate metabolic process	219	11	4.32	0.00411	0.0357812	BP	14	G. hirsutum
GO:0006090	pyruvate metabolic process	55	5	1.08	0.00445	0.038365	BP	14	G. hirsutum
GO:0090407	organophosphate biosynthetic process	191	10	3.77	0.00458	0.0391062	BP	14	G. hirsutum
GO:0044281	small molecule metabolic process	729	25	14.37	0.00481	0.0399185	BP	14	G. hirsutum
GO:0019359	nicotinamide nucleotide biosynthetic pro...	56	5	1.1	0.00481	0.0399185	BP	14	G. hirsutum
GO:0019363	pyridine nucleotide biosynthetic process	56	5	1.1	0.00481	0.0399185	BP	14	G. hirsutum
GO:0046394	carboxylic acid biosynthetic process	258	12	5.09	0.00512	0.0420978	BP	14	G. hirsutum
GO:0016053	organic acid biosynthetic process	259	12	5.11	0.00528	0.043015	BP	14	G. hirsutum
GO:0006165	nucleoside diphosphate phosphorylation	58	5	1.14	0.00559	0.0443207	BP	14	G. hirsutum
GO:0046434	organophosphate catabolic process	58	5	1.14	0.00559	0.0443207	BP	14	G. hirsutum
GO:0046939	nucleotide phosphorylation	58	5	1.14	0.00559	0.0443207	BP	14	G. hirsutum
GO:0030117	membrane coat	78	21	1.81	1.5e-17	1.7475e-15	CC	14	G. hirsutum
GO:0048475	coated membrane	78	21	1.81	1.5e-17	1.7475e-15	CC	14	G. hirsutum
GO:0098796	membrane protein complex	327	33	7.6	1.3e-13	1.00967e-11	CC	14	G. hirsutum
GO:0012506	vesicle membrane	38	10	0.88	8.6e-09	2.0038e-07	CC	14	G. hirsutum
GO:0030120	vesicle coat	38	10	0.88	8.6e-09	2.0038e-07	CC	14	G. hirsutum
GO:0030135	coated vesicle	38	10	0.88	8.6e-09	2.0038e-07	CC	14	G. hirsutum
GO:0030659	cytoplasmic vesicle membrane	38	10	0.88	8.6e-09	2.0038e-07	CC	14	G. hirsutum
GO:0030660	Golgi-associated vesicle membrane	38	10	0.88	8.6e-09	2.0038e-07	CC	14	G. hirsutum
GO:0030662	coated vesicle membrane	38	10	0.88	8.6e-09	2.0038e-07	CC	14	G. hirsutum
GO:0044433	cytoplasmic vesicle part	38	10	0.88	8.6e-09	2.0038e-07	CC	14	G. hirsutum
GO:0005798	Golgi-associated vesicle	41	10	0.95	1.9e-08	3.16214e-07	CC	14	G. hirsutum
GO:0031410	cytoplasmic vesicle	41	10	0.95	1.9e-08	3.16214e-07	CC	14	G. hirsutum
GO:0031982	vesicle	41	10	0.95	1.9e-08	3.16214e-07	CC	14	G. hirsutum
GO:0097708	intracellular vesicle	41	10	0.95	1.9e-08	3.16214e-07	CC	14	G. hirsutum
GO:0098588	bounding membrane of organelle	94	14	2.19	2.3e-08	3.57267e-07	CC	14	G. hirsutum
GO:0012505	endomembrane system	195	19	4.53	7.7e-08	1.12131e-06	CC	14	G. hirsutum
GO:0005794	Golgi apparatus	60	11	1.4	8.8e-08	1.13911e-06	CC	14	G. hirsutum
GO:0044431	Golgi apparatus part	60	11	1.4	8.8e-08	1.13911e-06	CC	14	G. hirsutum
GO:0031090	organelle membrane	125	15	2.91	1.4e-07	1.71684e-06	CC	14	G. hirsutum
GO:0044425	membrane part	1223	53	28.44	4.2e-07	4.893e-06	CC	14	G. hirsutum
GO:0098805	whole membrane	73	11	1.7	7.1e-07	7.87762e-06	CC	14	G. hirsutum
GO:0030126	COPI vesicle coat	11	5	0.26	2.6e-06	2.52417e-05	CC	14	G. hirsutum
GO:0030137	COPI-coated vesicle	11	5	0.26	2.6e-06	2.52417e-05	CC	14	G. hirsutum
GO:0030663	COPI-coated vesicle membrane	11	5	0.26	2.6e-06	2.52417e-05	CC	14	G. hirsutum
GO:0044422	organelle part	398	23	9.26	3.2e-05	0.000276148	CC	14	G. hirsutum
GO:0044446	intracellular organelle part	398	23	9.26	3.2e-05	0.000276148	CC	14	G. hirsutum
GO:0044444	cytoplasmic part	931	40	21.65	3.2e-05	0.000276148	CC	14	G. hirsutum
GO:0030118	clathrin coat	29	6	0.67	4.3e-05	0.000357821	CC	14	G. hirsutum
GO:0005737	cytoplasm	1287	49	29.93	7.3e-05	0.000586517	CC	14	G. hirsutum
GO:0032991	protein-containing complex	1267	47	29.47	0.00022	0.00170867	CC	14	G. hirsutum
GO:0030133	transport vesicle	27	5	0.63	0.00033	0.00240281	CC	14	G. hirsutum
GO:0030658	transport vesicle membrane	27	5	0.63	0.00033	0.00240281	CC	14	G. hirsutum
GO:0033178	proton-transporting two-sector ATPase co...	44	6	1.02	0.00048	0.00338909	CC	14	G. hirsutum
GO:0016020	membrane	2347	72	54.58	0.00075	0.00513971	CC	14	G. hirsutum
GO:0030119	AP-type membrane coat adaptor complex	20	4	0.47	0.00101	0.00653694	CC	14	G. hirsutum
GO:0030131	clathrin adaptor complex	20	4	0.47	0.00101	0.00653694	CC	14	G. hirsutum
GO:0016469	proton-transporting two-sector ATPase co...	94	8	2.19	0.00141	0.00887919	CC	14	G. hirsutum
GO:0045261	proton-transporting ATP synthase complex...	17	3	0.4	0.00657	0.0397892	CC	14	G. hirsutum
GO:0031984	organelle subcompartment	73	6	1.7	0.00666	0.0397892	CC	14	G. hirsutum
GO:0012507	ER to Golgi transport vesicle membrane	18	3	0.42	0.00775	0.042994	CC	14	G. hirsutum
GO:0030127	COPII vesicle coat	18	3	0.42	0.00775	0.042994	CC	14	G. hirsutum
GO:0030134	COPII-coated ER to Golgi transport vesic...	18	3	0.42	0.00775	0.042994	CC	14	G. hirsutum
GO:0007585	respiratory gaseous exchange	5	3	0.06	1.5e-05	0.01332	BP	16	G. hirsutum
GO:0003676	nucleic acid binding	2686	44	21.05	4.8e-07	0.00030336	MF	18	G. hirsutum
GO:0003735	structural constituent of ribosome	481	15	3.77	5.4e-06	0.0017064	MF	18	G. hirsutum
GO:0005198	structural molecule activity	548	15	4.3	2.5e-05	0.00526667	MF	18	G. hirsutum
GO:0003899	DNA-directed 5'-3' RNA polymerase activi...	88	6	0.69	6.6e-05	0.010428	MF	18	G. hirsutum
GO:0034062	5'-3' RNA polymerase activity	96	6	0.75	0.00011	0.0115867	MF	18	G. hirsutum
GO:0097747	RNA polymerase activity	96	6	0.75	0.00011	0.0115867	MF	18	G. hirsutum
GO:0006518	peptide metabolic process	647	19	5.22	7.4e-07	0.0004736	BP	18	G. hirsutum
GO:0043603	cellular amide metabolic process	679	19	5.47	1.5e-06	0.0004736	BP	18	G. hirsutum
GO:0010467	gene expression	2253	38	18.16	1.6e-06	0.0004736	BP	18	G. hirsutum
GO:0006412	translation	635	18	5.12	2.5e-06	0.00047952	BP	18	G. hirsutum
GO:0043043	peptide biosynthetic process	639	18	5.15	2.7e-06	0.00047952	BP	18	G. hirsutum
GO:0043604	amide biosynthetic process	662	18	5.34	4.5e-06	0.000666	BP	18	G. hirsutum
GO:0044271	cellular nitrogen compound biosynthetic ...	2289	37	18.45	6.9e-06	0.000875314	BP	18	G. hirsutum
GO:0034645	cellular macromolecule biosynthetic proc...	2333	37	18.81	1.1e-05	0.00108533	BP	18	G. hirsutum
GO:0009059	macromolecule biosynthetic process	2336	37	18.83	1.1e-05	0.00108533	BP	18	G. hirsutum
GO:0034641	cellular nitrogen compound metabolic pro...	2926	42	23.59	2.4e-05	0.0021312	BP	18	G. hirsutum
GO:1901576	organic substance biosynthetic process	2931	41	23.63	6.3e-05	0.00508582	BP	18	G. hirsutum
GO:0044249	cellular biosynthetic process	2836	40	22.86	6.9e-05	0.005106	BP	18	G. hirsutum
GO:1901566	organonitrogen compound biosynthetic pro...	1056	20	8.51	0.00023	0.0157108	BP	18	G. hirsutum
GO:0009058	biosynthetic process	3114	41	25.1	0.00027	0.0171257	BP	18	G. hirsutum
GO:0044424	intracellular part	2481	45	29.1	1.9e-05	0.001631	CC	18	G. hirsutum
GO:0043226	organelle	1818	37	21.32	2.7e-05	0.001631	CC	18	G. hirsutum
GO:0043229	intracellular organelle	1818	37	21.32	2.7e-05	0.001631	CC	18	G. hirsutum
GO:0005622	intracellular	2903	49	34.04	2.8e-05	0.001631	CC	18	G. hirsutum
GO:0032991	protein-containing complex	1267	29	14.86	5.6e-05	0.0026096	CC	18	G. hirsutum
GO:0005737	cytoplasm	1287	29	15.09	7.7e-05	0.00299017	CC	18	G. hirsutum
GO:1990904	ribonucleoprotein complex	507	16	5.95	0.00016	0.00466	CC	18	G. hirsutum
GO:0005623	cell	3058	49	35.86	0.00018	0.00466	CC	18	G. hirsutum
GO:0044464	cell part	3058	49	35.86	0.00018	0.00466	CC	18	G. hirsutum
GO:0005840	ribosome	481	15	5.64	0.00031	0.007223	CC	18	G. hirsutum
GO:0043228	non-membrane-bounded organelle	643	17	7.54	0.0008	0.0155333	CC	18	G. hirsutum
GO:0043232	intracellular non-membrane-bounded organ...	643	17	7.54	0.0008	0.0155333	CC	18	G. hirsutum
GO:0044444	cytoplasmic part	931	21	10.92	0.00134	0.0240169	CC	18	G. hirsutum
GO:1905368	peptidase complex	49	4	0.57	0.00244	0.0406086	CC	18	G. hirsutum
GO:0016705	oxidoreductase activity, acting on paire...	507	18	4.72	1.1e-06	0.0006952	MF	19	G. hirsutum
GO:0016706	oxidoreductase activity, acting on paire...	162	10	1.51	2.8e-06	0.0008848	MF	19	G. hirsutum
GO:0051213	dioxygenase activity	190	10	1.77	1.1e-05	0.00231733	MF	19	G. hirsutum
GO:0016491	oxidoreductase activity	1879	36	17.48	1.6e-05	0.002528	MF	19	G. hirsutum
GO:0016491	oxidoreductase activity	1879	31	15.69	0.00014	0.0474	MF	21	G. hirsutum
GO:0004568	chitinase activity	13	3	0.11	0.00015	0.0474	MF	21	G. hirsutum
GO:0009607	response to biotic stimulus	48	8	0.5	2.7e-08	2.3532e-05	BP	21	G. hirsutum
GO:0006952	defense response	52	8	0.54	5.3e-08	2.3532e-05	BP	21	G. hirsutum
GO:0006026	aminoglycan catabolic process	13	3	0.13	0.00029	0.0286133	BP	21	G. hirsutum
GO:0006030	chitin metabolic process	13	3	0.13	0.00029	0.0286133	BP	21	G. hirsutum
GO:0006032	chitin catabolic process	13	3	0.13	0.00029	0.0286133	BP	21	G. hirsutum
GO:0006040	amino sugar metabolic process	13	3	0.13	0.00029	0.0286133	BP	21	G. hirsutum
GO:0046348	amino sugar catabolic process	13	3	0.13	0.00029	0.0286133	BP	21	G. hirsutum
GO:1901071	glucosamine-containing compound metaboli...	13	3	0.13	0.00029	0.0286133	BP	21	G. hirsutum
GO:1901072	glucosamine-containing compound cataboli...	13	3	0.13	0.00029	0.0286133	BP	21	G. hirsutum
GO:0006022	aminoglycan metabolic process	15	3	0.16	0.00045	0.03996	BP	21	G. hirsutum
GO:0033897	ribonuclease T2 activity	12	3	0.07	4.8e-05	0.0166427	MF	22	G. hirsutum
GO:0016892	endoribonuclease activity, producing 3'-...	14	3	0.09	7.9e-05	0.0166427	MF	22	G. hirsutum
GO:0016894	endonuclease activity, active with eithe...	14	3	0.09	7.9e-05	0.0166427	MF	22	G. hirsutum
GO:0003954	NADH dehydrogenase activity	32	12	0.2	3.1e-19	6.53067e-17	MF	23	G. hirsutum
GO:0008137	NADH dehydrogenase (ubiquinone) activity	32	12	0.2	3.1e-19	6.53067e-17	MF	23	G. hirsutum
GO:0050136	NADH dehydrogenase (quinone) activity	32	12	0.2	3.1e-19	6.53067e-17	MF	23	G. hirsutum
GO:0016655	oxidoreductase activity, acting on NAD(P...	36	12	0.22	1.7e-18	2.686e-16	MF	23	G. hirsutum
GO:0015078	proton transmembrane transporter activit...	152	17	0.94	4.5e-17	5.688e-15	MF	23	G. hirsutum
GO:0015077	monovalent inorganic cation transmembran...	198	17	1.22	4.1e-15	4.31867e-13	MF	23	G. hirsutum
GO:0003735	structural constituent of ribosome	481	22	2.97	1.3e-13	1.17371e-11	MF	23	G. hirsutum
GO:0016651	oxidoreductase activity, acting on NAD(P...	147	14	0.91	3.1e-13	2.449e-11	MF	23	G. hirsutum
GO:0022890	inorganic cation transmembrane transport...	269	17	1.66	6.4e-13	4.49422e-11	MF	23	G. hirsutum
GO:0008324	cation transmembrane transporter activit...	284	17	1.76	1.5e-12	9.48e-11	MF	23	G. hirsutum
GO:0005198	structural molecule activity	548	22	3.39	1.8e-12	1.03418e-10	MF	23	G. hirsutum
GO:0015318	inorganic molecular entity transmembrane...	346	17	2.14	3.5e-11	1.84333e-09	MF	23	G. hirsutum
GO:0015075	ion transmembrane transporter activity	364	17	2.25	7.8e-11	3.792e-09	MF	23	G. hirsutum
GO:0022857	transmembrane transporter activity	604	19	3.73	4.2e-09	1.896e-07	MF	23	G. hirsutum
GO:0046933	proton-transporting ATP synthase activit...	35	6	0.22	6.7e-08	2.686e-06	MF	23	G. hirsutum
GO:0003899	DNA-directed 5'-3' RNA polymerase activi...	88	8	0.54	6.8e-08	2.686e-06	MF	23	G. hirsutum
GO:0034062	5'-3' RNA polymerase activity	96	8	0.59	1.3e-07	4.56444e-06	MF	23	G. hirsutum
GO:0097747	RNA polymerase activity	96	8	0.59	1.3e-07	4.56444e-06	MF	23	G. hirsutum
GO:0036442	proton-exporting ATPase activity	42	6	0.26	2.1e-07	6.636e-06	MF	23	G. hirsutum
GO:0046961	proton-transporting ATPase activity, rot...	42	6	0.26	2.1e-07	6.636e-06	MF	23	G. hirsutum
GO:0019829	cation-transporting ATPase activity	45	6	0.28	3.2e-07	8.42667e-06	MF	23	G. hirsutum
GO:0022853	active ion transmembrane transporter act...	45	6	0.28	3.2e-07	8.42667e-06	MF	23	G. hirsutum
GO:0042625	ATPase coupled ion transmembrane transpo...	45	6	0.28	3.2e-07	8.42667e-06	MF	23	G. hirsutum
GO:0044769	ATPase activity, coupled to transmembran...	45	6	0.28	3.2e-07	8.42667e-06	MF	23	G. hirsutum
GO:0005215	transporter activity	821	19	5.07	5.4e-07	1.36512e-05	MF	23	G. hirsutum
GO:0015002	heme-copper terminal oxidase activity	20	4	0.12	6.2e-06	0.000150708	MF	23	G. hirsutum
GO:0015399	primary active transmembrane transporter...	120	7	0.74	9.3e-06	0.000209914	MF	23	G. hirsutum
GO:0015405	P-P-bond-hydrolysis-driven transmembrane...	120	7	0.74	9.3e-06	0.000209914	MF	23	G. hirsutum
GO:0016779	nucleotidyltransferase activity	193	8	1.19	2.6e-05	0.000566621	MF	23	G. hirsutum
GO:0042626	ATPase activity, coupled to transmembran...	101	6	0.62	3.8e-05	0.00077471	MF	23	G. hirsutum
GO:0043492	ATPase activity, coupled to movement of ...	101	6	0.62	3.8e-05	0.00077471	MF	23	G. hirsutum
GO:0016168	chlorophyll binding	12	3	0.07	4.8e-05	0.000948	MF	23	G. hirsutum
GO:0045156	electron transporter, transferring elect...	13	3	0.08	6.3e-05	0.00120655	MF	23	G. hirsutum
GO:0016491	oxidoreductase activity	1879	25	11.61	0.00014	0.00260235	MF	23	G. hirsutum
GO:0004129	cytochrome-c oxidase activity	18	3	0.11	0.00017	0.00290378	MF	23	G. hirsutum
GO:0016675	oxidoreductase activity, acting on a hem...	18	3	0.11	0.00017	0.00290378	MF	23	G. hirsutum
GO:0016676	oxidoreductase activity, acting on a hem...	18	3	0.11	0.00017	0.00290378	MF	23	G. hirsutum
GO:0019843	rRNA binding	22	3	0.14	0.00032	0.00518564	MF	23	G. hirsutum
GO:0140098	catalytic activity, acting on RNA	278	8	1.72	0.00032	0.00518564	MF	23	G. hirsutum
GO:0022804	active transmembrane transporter activit...	240	7	1.48	0.00072	0.011376	MF	23	G. hirsutum
GO:0015979	photosynthesis	132	23	1.16	4.6e-24	4.0848e-21	BP	23	G. hirsutum
GO:0022900	electron transport chain	56	16	0.49	1.1e-20	4.884e-18	BP	23	G. hirsutum
GO:0006091	generation of precursor metabolites and ...	124	20	1.09	2.8e-20	8.288e-18	BP	23	G. hirsutum
GO:0046034	ATP metabolic process	127	19	1.11	1.2e-18	2.664e-16	BP	23	G. hirsutum
GO:0009126	purine nucleoside monophosphate metaboli...	136	19	1.19	4.5e-18	4.44e-16	BP	23	G. hirsutum
GO:0009144	purine nucleoside triphosphate metabolic...	136	19	1.19	4.5e-18	4.44e-16	BP	23	G. hirsutum
GO:0009167	purine ribonucleoside monophosphate meta...	136	19	1.19	4.5e-18	4.44e-16	BP	23	G. hirsutum
GO:0009199	ribonucleoside triphosphate metabolic pr...	136	19	1.19	4.5e-18	4.44e-16	BP	23	G. hirsutum
GO:0009205	purine ribonucleoside triphosphate metab...	136	19	1.19	4.5e-18	4.44e-16	BP	23	G. hirsutum
GO:0009141	nucleoside triphosphate metabolic proces...	137	19	1.2	5.2e-18	4.6176e-16	BP	23	G. hirsutum
GO:0009161	ribonucleoside monophosphate metabolic p...	139	19	1.22	6.9e-18	5.57018e-16	BP	23	G. hirsutum
GO:0009123	nucleoside monophosphate metabolic proce...	142	19	1.24	1e-17	7.4e-16	BP	23	G. hirsutum
GO:0009150	purine ribonucleotide metabolic process	162	19	1.42	1.3e-16	8.88e-15	BP	23	G. hirsutum
GO:0009259	ribonucleotide metabolic process	165	19	1.45	1.9e-16	1.20514e-14	BP	23	G. hirsutum
GO:0006163	purine nucleotide metabolic process	166	19	1.45	2.1e-16	1.2432e-14	BP	23	G. hirsutum
GO:0072521	purine-containing compound metabolic pro...	168	19	1.47	2.6e-16	1.443e-14	BP	23	G. hirsutum
GO:0019693	ribose phosphate metabolic process	190	19	1.66	2.7e-15	1.41035e-13	BP	23	G. hirsutum
GO:0045333	cellular respiration	37	11	0.32	9.4e-15	4.63733e-13	BP	23	G. hirsutum
GO:0009117	nucleotide metabolic process	212	19	1.86	2e-14	9.34737e-13	BP	23	G. hirsutum
GO:0015980	energy derivation by oxidation of organi...	40	11	0.35	2.5e-14	1.11e-12	BP	23	G. hirsutum
GO:0006753	nucleoside phosphate metabolic process	219	19	1.92	3.7e-14	1.56457e-12	BP	23	G. hirsutum
GO:0017144	drug metabolic process	222	19	1.95	4.7e-14	1.89709e-12	BP	23	G. hirsutum
GO:0055086	nucleobase-containing small molecule met...	248	19	2.17	3.5e-13	1.3513e-11	BP	23	G. hirsutum
GO:1902600	proton transmembrane transport	93	13	0.81	1.2e-12	4.44e-11	BP	23	G. hirsutum
GO:0022904	respiratory electron transport chain	28	9	0.25	1.3e-12	4.6176e-11	BP	23	G. hirsutum
GO:0006119	oxidative phosphorylation	22	8	0.19	7.6e-12	2.49956e-10	BP	23	G. hirsutum
GO:0042773	ATP synthesis coupled electron transport	22	8	0.19	7.6e-12	2.49956e-10	BP	23	G. hirsutum
GO:0019637	organophosphate metabolic process	327	19	2.87	4.7e-11	1.49057e-09	BP	23	G. hirsutum
GO:0019684	photosynthesis, light reaction	29	8	0.25	9.6e-11	2.93959e-09	BP	23	G. hirsutum
GO:0034220	ion transmembrane transport	136	13	1.19	1.6e-10	4.30545e-09	BP	23	G. hirsutum
GO:0098655	cation transmembrane transport	136	13	1.19	1.6e-10	4.30545e-09	BP	23	G. hirsutum
GO:0098660	inorganic ion transmembrane transport	136	13	1.19	1.6e-10	4.30545e-09	BP	23	G. hirsutum
GO:0098662	inorganic cation transmembrane transport	136	13	1.19	1.6e-10	4.30545e-09	BP	23	G. hirsutum
GO:1901135	carbohydrate derivative metabolic proces...	379	19	3.32	5.8e-10	1.51482e-08	BP	23	G. hirsutum
GO:0015672	monovalent inorganic cation transport	154	13	1.35	7.7e-10	1.9536e-08	BP	23	G. hirsutum
GO:0006412	translation	635	22	5.56	2.1e-08	5.18e-07	BP	23	G. hirsutum
GO:0043043	peptide biosynthetic process	639	22	5.6	2.4e-08	5.76e-07	BP	23	G. hirsutum
GO:0044237	cellular metabolic process	5724	77	50.16	2.9e-08	6.77684e-07	BP	23	G. hirsutum
GO:0006518	peptide metabolic process	647	22	5.67	3e-08	6.83077e-07	BP	23	G. hirsutum
GO:0043604	amide biosynthetic process	662	22	5.8	4.5e-08	9.99e-07	BP	23	G. hirsutum
GO:1901566	organonitrogen compound biosynthetic pro...	1056	28	9.25	5.8e-08	1.2562e-06	BP	23	G. hirsutum
GO:0009767	photosynthetic electron transport chain	25	6	0.22	6e-08	1.26857e-06	BP	23	G. hirsutum
GO:0043603	cellular amide metabolic process	679	22	5.95	7e-08	1.44558e-06	BP	23	G. hirsutum
GO:0034641	cellular nitrogen compound metabolic pro...	2926	50	25.64	1.4e-07	2.82545e-06	BP	23	G. hirsutum
GO:0015988	energy coupled proton transmembrane tran...	55	7	0.48	4.6e-07	8.33633e-06	BP	23	G. hirsutum
GO:0015991	ATP hydrolysis coupled proton transport	55	7	0.48	4.6e-07	8.33633e-06	BP	23	G. hirsutum
GO:0090662	ATP hydrolysis coupled transmembrane tra...	55	7	0.48	4.6e-07	8.33633e-06	BP	23	G. hirsutum
GO:0099131	ATP hydrolysis coupled ion transmembrane...	55	7	0.48	4.6e-07	8.33633e-06	BP	23	G. hirsutum
GO:0099132	ATP hydrolysis coupled cation transmembr...	55	7	0.48	4.6e-07	8.33633e-06	BP	23	G. hirsutum
GO:0015985	energy coupled proton transport, down el...	39	6	0.34	1e-06	1.74118e-05	BP	23	G. hirsutum
GO:0015986	ATP synthesis coupled proton transport	39	6	0.34	1e-06	1.74118e-05	BP	23	G. hirsutum
GO:0006812	cation transport	349	14	3.06	2e-06	3.41538e-05	BP	23	G. hirsutum
GO:0009987	cellular process	6807	80	59.65	1.1e-05	0.000184302	BP	23	G. hirsutum
GO:0008535	respiratory chain complex IV assembly	6	3	0.05	1.3e-05	0.000213778	BP	23	G. hirsutum
GO:0044281	small molecule metabolic process	729	19	6.39	1.5e-05	0.000242182	BP	23	G. hirsutum
GO:0006811	ion transport	419	14	3.67	1.6e-05	0.000253714	BP	23	G. hirsutum
GO:0017004	cytochrome complex assembly	8	3	0.07	3.5e-05	0.000545263	BP	23	G. hirsutum
GO:0008152	metabolic process	8883	92	77.84	0.00014	0.00214345	BP	23	G. hirsutum
GO:0044271	cellular nitrogen compound biosynthetic ...	2289	36	20.06	0.00015	0.00225763	BP	23	G. hirsutum
GO:0006754	ATP biosynthetic process	93	6	0.81	0.00016	0.002368	BP	23	G. hirsutum
GO:0009772	photosynthetic electron transport in pho...	13	3	0.11	0.00018	0.00262033	BP	23	G. hirsutum
GO:0009142	nucleoside triphosphate biosynthetic pro...	99	6	0.87	0.00023	0.00314215	BP	23	G. hirsutum
GO:0009145	purine nucleoside triphosphate biosynthe...	99	6	0.87	0.00023	0.00314215	BP	23	G. hirsutum
GO:0009201	ribonucleoside triphosphate biosynthetic...	99	6	0.87	0.00023	0.00314215	BP	23	G. hirsutum
GO:0009206	purine ribonucleoside triphosphate biosy...	99	6	0.87	0.00023	0.00314215	BP	23	G. hirsutum
GO:0009127	purine nucleoside monophosphate biosynth...	102	6	0.89	0.00027	0.00357851	BP	23	G. hirsutum
GO:0009168	purine ribonucleoside monophosphate bios...	102	6	0.89	0.00027	0.00357851	BP	23	G. hirsutum
GO:0009156	ribonucleoside monophosphate biosyntheti...	105	6	0.92	0.00031	0.00404824	BP	23	G. hirsutum
GO:0009124	nucleoside monophosphate biosynthetic pr...	108	6	0.95	0.00036	0.00463304	BP	23	G. hirsutum
GO:0009152	purine ribonucleotide biosynthetic proce...	110	6	0.96	0.0004	0.00507429	BP	23	G. hirsutum
GO:0009260	ribonucleotide biosynthetic process	113	6	0.99	0.00046	0.00567333	BP	23	G. hirsutum
GO:0046390	ribose phosphate biosynthetic process	113	6	0.99	0.00046	0.00567333	BP	23	G. hirsutum
GO:0006164	purine nucleotide biosynthetic process	114	6	1	0.00048	0.0058389	BP	23	G. hirsutum
GO:0072522	purine-containing compound biosynthetic ...	116	6	1.02	0.00053	0.00636	BP	23	G. hirsutum
GO:0009165	nucleotide biosynthetic process	134	6	1.17	0.00113	0.0133792	BP	23	G. hirsutum
GO:0055114	oxidation-reduction process	1613	26	14.13	0.00121	0.0141379	BP	23	G. hirsutum
GO:1901293	nucleoside phosphate biosynthetic proces...	138	6	1.21	0.00132	0.0152229	BP	23	G. hirsutum
GO:0009060	aerobic respiration	9	2	0.08	0.00263	0.0299415	BP	23	G. hirsutum
GO:0032991	protein-containing complex	1267	60	19.39	1.9e-22	4.427e-20	CC	23	G. hirsutum
GO:0098796	membrane protein complex	327	35	5	4.1e-22	4.7765e-20	CC	23	G. hirsutum
GO:0009579	thylakoid	111	22	1.7	1.6e-19	9.32e-18	CC	23	G. hirsutum
GO:0044436	thylakoid part	111	22	1.7	1.6e-19	9.32e-18	CC	23	G. hirsutum
GO:0009521	photosystem	99	20	1.52	6.2e-18	2.8892e-16	CC	23	G. hirsutum
GO:0034357	photosynthetic membrane	105	20	1.61	2.1e-17	8.155e-16	CC	23	G. hirsutum
GO:0016469	proton-transporting two-sector ATPase co...	94	15	1.44	5.2e-12	1.73086e-10	CC	23	G. hirsutum
GO:0009523	photosystem II	46	10	0.7	1e-09	2.9125e-08	CC	23	G. hirsutum
GO:0009539	photosystem II reaction center	6	5	0.09	4.4e-09	1.13911e-07	CC	23	G. hirsutum
GO:0033177	proton-transporting two-sector ATPase co...	46	8	0.7	3.4e-07	7.922e-06	CC	23	G. hirsutum
GO:0044425	membrane part	1223	39	18.72	4.4e-07	9.32e-06	CC	23	G. hirsutum
GO:0005840	ribosome	481	22	7.36	1.6e-06	3.10667e-05	CC	23	G. hirsutum
GO:0009522	photosystem I	41	7	0.63	2.2e-06	3.94308e-05	CC	23	G. hirsutum
GO:1990904	ribonucleoprotein complex	507	22	7.76	3.8e-06	6.32429e-05	CC	23	G. hirsutum
GO:0045263	proton-transporting ATP synthase complex...	21	5	0.32	1.2e-05	0.0001864	CC	23	G. hirsutum
GO:0045259	proton-transporting ATP synthase complex	38	6	0.58	2e-05	0.00029125	CC	23	G. hirsutum
GO:0044444	cytoplasmic part	931	29	14.25	5.4e-05	0.000740118	CC	23	G. hirsutum
GO:0043228	non-membrane-bounded organelle	643	22	9.84	0.00016	0.00196211	CC	23	G. hirsutum
GO:0043232	intracellular non-membrane-bounded organ...	643	22	9.84	0.00016	0.00196211	CC	23	G. hirsutum
GO:0044424	intracellular part	2481	53	37.97	0.00038	0.004427	CC	23	G. hirsutum
GO:0033178	proton-transporting two-sector ATPase co...	44	5	0.67	0.0005	0.00554762	CC	23	G. hirsutum
GO:0009536	plastid	47	5	0.72	0.00068	0.00720182	CC	23	G. hirsutum
GO:0009512	cytochrome b6f complex	6	2	0.09	0.00333	0.0337343	CC	23	G. hirsutum
GO:0016020	membrane	2347	48	35.92	0.00382	0.0370858	CC	23	G. hirsutum
GO:0043531	ADP binding	272	12	1.8	2.4e-07	0.00014852	MF	24	G. hirsutum
GO:0005515	protein binding	3489	46	23.12	4.7e-07	0.00014852	MF	24	G. hirsutum
GO:0005488	binding	10185	87	67.5	1.7e-05	0.00358133	MF	24	G. hirsutum
GO:0005086	ARF guanyl-nucleotide exchange factor ac...	13	3	0.09	7.7e-05	0.012166	MF	24	G. hirsutum
GO:0007265	Ras protein signal transduction	13	3	0.06	2.5e-05	0.0037	BP	24	G. hirsutum
GO:0032011	ARF protein signal transduction	13	3	0.06	2.5e-05	0.0037	BP	24	G. hirsutum
GO:0032012	regulation of ARF protein signal transdu...	13	3	0.06	2.5e-05	0.0037	BP	24	G. hirsutum
GO:0046578	regulation of Ras protein signal transdu...	13	3	0.06	2.5e-05	0.0037	BP	24	G. hirsutum
GO:0051056	regulation of small GTPase mediated sign...	13	3	0.06	2.5e-05	0.0037	BP	24	G. hirsutum
GO:1902531	regulation of intracellular signal trans...	13	3	0.06	2.5e-05	0.0037	BP	24	G. hirsutum
GO:0009966	regulation of signal transduction	21	3	0.1	0.00011	0.0108533	BP	24	G. hirsutum
GO:0010646	regulation of cell communication	21	3	0.1	0.00011	0.0108533	BP	24	G. hirsutum
GO:0023051	regulation of signaling	21	3	0.1	0.00011	0.0108533	BP	24	G. hirsutum
GO:0048583	regulation of response to stimulus	22	3	0.1	0.00013	0.011544	BP	24	G. hirsutum
GO:0051716	cellular response to stimulus	621	10	2.83	0.00042	0.0339055	BP	24	G. hirsutum
GO:0016168	chlorophyll binding	12	8	0.09	3.1e-15	1.9592e-12	MF	25	G. hirsutum
GO:0003899	DNA-directed 5'-3' RNA polymerase activi...	88	12	0.64	1.7e-12	5.372e-10	MF	25	G. hirsutum
GO:0034062	5'-3' RNA polymerase activity	96	12	0.7	5e-12	7.9e-10	MF	25	G. hirsutum
GO:0097747	RNA polymerase activity	96	12	0.7	5e-12	7.9e-10	MF	25	G. hirsutum
GO:0003954	NADH dehydrogenase activity	32	8	0.23	5.9e-11	5.32686e-09	MF	25	G. hirsutum
GO:0008137	NADH dehydrogenase (ubiquinone) activity	32	8	0.23	5.9e-11	5.32686e-09	MF	25	G. hirsutum
GO:0050136	NADH dehydrogenase (quinone) activity	32	8	0.23	5.9e-11	5.32686e-09	MF	25	G. hirsutum
GO:0016984	ribulose-bisphosphate carboxylase activi...	6	5	0.04	1.2e-10	9.48e-09	MF	25	G. hirsutum
GO:0016655	oxidoreductase activity, acting on NAD(P...	36	8	0.26	1.7e-10	1.19378e-08	MF	25	G. hirsutum
GO:0045156	electron transporter, transferring elect...	13	6	0.1	2.2e-10	1.3904e-08	MF	25	G. hirsutum
GO:0003735	structural constituent of ribosome	481	20	3.52	2.8e-10	1.60873e-08	MF	25	G. hirsutum
GO:0016651	oxidoreductase activity, acting on NAD(P...	147	12	1.08	7.8e-10	4.108e-08	MF	25	G. hirsutum
GO:0015078	proton transmembrane transporter activit...	152	12	1.11	1.2e-09	5.83385e-08	MF	25	G. hirsutum
GO:0005198	structural molecule activity	548	20	4.02	2.7e-09	1.21886e-07	MF	25	G. hirsutum
GO:0048038	quinone binding	23	6	0.17	1.2e-08	5.056e-07	MF	25	G. hirsutum
GO:0016779	nucleotidyltransferase activity	193	12	1.41	1.7e-08	6.715e-07	MF	25	G. hirsutum
GO:0015077	monovalent inorganic cation transmembran...	198	12	1.45	2.3e-08	8.55059e-07	MF	25	G. hirsutum
GO:0048037	cofactor binding	1045	24	7.66	4.5e-07	1.58e-05	MF	25	G. hirsutum
GO:0022890	inorganic cation transmembrane transport...	269	12	1.97	6.5e-07	2.16211e-05	MF	25	G. hirsutum
GO:0016831	carboxy-lyase activity	45	6	0.33	8.8e-07	2.76876e-05	MF	25	G. hirsutum
GO:0140098	catalytic activity, acting on RNA	278	12	2.04	9.2e-07	2.76876e-05	MF	25	G. hirsutum
GO:0008324	cation transmembrane transporter activit...	284	12	2.08	1.1e-06	3.16e-05	MF	25	G. hirsutum
GO:0015318	inorganic molecular entity transmembrane...	346	12	2.54	8.8e-06	0.000241809	MF	25	G. hirsutum
GO:0015075	ion transmembrane transporter activity	364	12	2.67	1.5e-05	0.000395	MF	25	G. hirsutum
GO:0016830	carbon-carbon lyase activity	77	6	0.56	2.1e-05	0.00053088	MF	25	G. hirsutum
GO:0046906	tetrapyrrole binding	427	12	3.13	6.9e-05	0.00167723	MF	25	G. hirsutum
GO:0051287	NAD binding	62	5	0.45	9e-05	0.00210667	MF	25	G. hirsutum
GO:0016491	oxidoreductase activity	1879	28	13.77	0.00017	0.00383714	MF	25	G. hirsutum
GO:0022857	transmembrane transporter activity	604	13	4.43	0.00048	0.0104607	MF	25	G. hirsutum
GO:0009055	electron transfer activity	531	12	3.89	0.00052	0.0109547	MF	25	G. hirsutum
GO:0000287	magnesium ion binding	102	5	0.75	0.00092	0.0187561	MF	25	G. hirsutum
GO:0006091	generation of precursor metabolites and ...	124	23	1.29	7.5e-23	6.645e-20	BP	25	G. hirsutum
GO:0009767	photosynthetic electron transport chain	25	14	0.26	3.3e-22	1.4619e-19	BP	25	G. hirsutum
GO:0019684	photosynthesis, light reaction	29	14	0.3	5.6e-21	1.65387e-18	BP	25	G. hirsutum
GO:0046034	ATP metabolic process	127	15	1.32	3.3e-12	7.3095e-10	BP	25	G. hirsutum
GO:0022904	respiratory electron transport chain	28	9	0.29	6.3e-12	8.05455e-10	BP	25	G. hirsutum
GO:0009126	purine nucleoside monophosphate metaboli...	136	15	1.42	9.2e-12	8.05455e-10	BP	25	G. hirsutum
GO:0009144	purine nucleoside triphosphate metabolic...	136	15	1.42	9.2e-12	8.05455e-10	BP	25	G. hirsutum
GO:0009167	purine ribonucleoside monophosphate meta...	136	15	1.42	9.2e-12	8.05455e-10	BP	25	G. hirsutum
GO:0009199	ribonucleoside triphosphate metabolic pr...	136	15	1.42	9.2e-12	8.05455e-10	BP	25	G. hirsutum
GO:0009205	purine ribonucleoside triphosphate metab...	136	15	1.42	9.2e-12	8.05455e-10	BP	25	G. hirsutum
GO:0009141	nucleoside triphosphate metabolic proces...	137	15	1.43	1e-11	8.05455e-10	BP	25	G. hirsutum
GO:1902600	proton transmembrane transport	93	13	0.97	1.1e-11	8.12167e-10	BP	25	G. hirsutum
GO:0009161	ribonucleoside monophosphate metabolic p...	139	15	1.45	1.3e-11	8.86e-10	BP	25	G. hirsutum
GO:0009123	nucleoside monophosphate metabolic proce...	142	15	1.48	1.7e-11	1.07586e-09	BP	25	G. hirsutum
GO:0044237	cellular metabolic process	5724	94	59.69	6.8e-11	4.01653e-09	BP	25	G. hirsutum
GO:0045333	cellular respiration	37	9	0.39	1e-10	5.5375e-09	BP	25	G. hirsutum
GO:0019693	ribose phosphate metabolic process	190	16	1.98	1.1e-10	5.73294e-09	BP	25	G. hirsutum
GO:0009150	purine ribonucleotide metabolic process	162	15	1.69	1.2e-10	5.90667e-09	BP	25	G. hirsutum
GO:0009259	ribonucleotide metabolic process	165	15	1.72	1.5e-10	6.84636e-09	BP	25	G. hirsutum
GO:0006163	purine nucleotide metabolic process	166	15	1.73	1.6e-10	6.84636e-09	BP	25	G. hirsutum
GO:0015985	energy coupled proton transport, down el...	39	9	0.41	1.7e-10	6.84636e-09	BP	25	G. hirsutum
GO:0015986	ATP synthesis coupled proton transport	39	9	0.41	1.7e-10	6.84636e-09	BP	25	G. hirsutum
GO:0072521	purine-containing compound metabolic pro...	168	15	1.75	1.9e-10	7.31913e-09	BP	25	G. hirsutum
GO:0015980	energy derivation by oxidation of organi...	40	9	0.42	2.2e-10	8.12167e-09	BP	25	G. hirsutum
GO:0009117	nucleotide metabolic process	212	16	2.21	5.7e-10	2.02008e-08	BP	25	G. hirsutum
GO:0006753	nucleoside phosphate metabolic process	219	16	2.28	9.2e-10	3.13508e-08	BP	25	G. hirsutum
GO:0034220	ion transmembrane transport	136	13	1.42	1.5e-09	4.43e-08	BP	25	G. hirsutum
GO:0098655	cation transmembrane transport	136	13	1.42	1.5e-09	4.43e-08	BP	25	G. hirsutum
GO:0098660	inorganic ion transmembrane transport	136	13	1.42	1.5e-09	4.43e-08	BP	25	G. hirsutum
GO:0098662	inorganic cation transmembrane transport	136	13	1.42	1.5e-09	4.43e-08	BP	25	G. hirsutum
GO:0009772	photosynthetic electron transport in pho...	13	6	0.14	1.8e-09	5.14452e-08	BP	25	G. hirsutum
GO:0055086	nucleobase-containing small molecule met...	248	16	2.59	5.6e-09	1.5505e-07	BP	25	G. hirsutum
GO:0015672	monovalent inorganic cation transport	154	13	1.61	6.7e-09	1.79885e-07	BP	25	G. hirsutum
GO:0017144	drug metabolic process	222	15	2.31	9.3e-09	2.42347e-07	BP	25	G. hirsutum
GO:0015977	carbon fixation	11	5	0.11	5e-08	1.26571e-06	BP	25	G. hirsutum
GO:0006119	oxidative phosphorylation	22	6	0.23	7.4e-08	1.772e-06	BP	25	G. hirsutum
GO:0042773	ATP synthesis coupled electron transport	22	6	0.23	7.4e-08	1.772e-06	BP	25	G. hirsutum
GO:0009987	cellular process	6807	97	70.98	2.5e-07	5.82895e-06	BP	25	G. hirsutum
GO:0019637	organophosphate metabolic process	327	16	3.41	2.7e-07	6.13385e-06	BP	25	G. hirsutum
GO:0006754	ATP biosynthetic process	93	9	0.97	5e-07	1.1075e-05	BP	25	G. hirsutum
GO:0009142	nucleoside triphosphate biosynthetic pro...	99	9	1.03	8.5e-07	1.71159e-05	BP	25	G. hirsutum
GO:0009145	purine nucleoside triphosphate biosynthe...	99	9	1.03	8.5e-07	1.71159e-05	BP	25	G. hirsutum
GO:0009201	ribonucleoside triphosphate biosynthetic...	99	9	1.03	8.5e-07	1.71159e-05	BP	25	G. hirsutum
GO:0009206	purine ribonucleoside triphosphate biosy...	99	9	1.03	8.5e-07	1.71159e-05	BP	25	G. hirsutum
GO:0009127	purine nucleoside monophosphate biosynth...	102	9	1.06	1.1e-06	2.1187e-05	BP	25	G. hirsutum
GO:0009168	purine ribonucleoside monophosphate bios...	102	9	1.06	1.1e-06	2.1187e-05	BP	25	G. hirsutum
GO:0009156	ribonucleoside monophosphate biosyntheti...	105	9	1.09	1.4e-06	2.63915e-05	BP	25	G. hirsutum
GO:0009124	nucleoside monophosphate biosynthetic pr...	108	9	1.13	1.8e-06	3.3225e-05	BP	25	G. hirsutum
GO:1901135	carbohydrate derivative metabolic proces...	379	16	3.95	1.9e-06	3.43551e-05	BP	25	G. hirsutum
GO:0009152	purine ribonucleotide biosynthetic proce...	110	9	1.15	2.1e-06	3.7212e-05	BP	25	G. hirsutum
GO:0009260	ribonucleotide biosynthetic process	113	9	1.18	2.6e-06	4.43e-05	BP	25	G. hirsutum
GO:0046390	ribose phosphate biosynthetic process	113	9	1.18	2.6e-06	4.43e-05	BP	25	G. hirsutum
GO:0006164	purine nucleotide biosynthetic process	114	9	1.19	2.8e-06	4.59407e-05	BP	25	G. hirsutum
GO:1901566	organonitrogen compound biosynthetic pro...	1056	28	11.01	2.8e-06	4.59407e-05	BP	25	G. hirsutum
GO:0072522	purine-containing compound biosynthetic ...	116	9	1.21	3.2e-06	5.15491e-05	BP	25	G. hirsutum
GO:0034641	cellular nitrogen compound metabolic pro...	2926	53	30.51	5.5e-06	8.70179e-05	BP	25	G. hirsutum
GO:0006412	translation	635	20	6.62	8.2e-06	0.00012746	BP	25	G. hirsutum
GO:0043043	peptide biosynthetic process	639	20	6.66	9e-06	0.000137483	BP	25	G. hirsutum
GO:0009165	nucleotide biosynthetic process	134	9	1.4	1.1e-05	0.000162433	BP	25	G. hirsutum
GO:0006518	peptide metabolic process	647	20	6.75	1.1e-05	0.000162433	BP	25	G. hirsutum
GO:0055114	oxidation-reduction process	1613	35	16.82	1.2e-05	0.000174295	BP	25	G. hirsutum
GO:1901293	nucleoside phosphate biosynthetic proces...	138	9	1.44	1.3e-05	0.000185774	BP	25	G. hirsutum
GO:0043604	amide biosynthetic process	662	20	6.9	1.5e-05	0.000210952	BP	25	G. hirsutum
GO:0008152	metabolic process	8883	110	92.63	1.7e-05	0.000235344	BP	25	G. hirsutum
GO:0043603	cellular amide metabolic process	679	20	7.08	2.2e-05	0.000299877	BP	25	G. hirsutum
GO:0006812	cation transport	349	13	3.64	6.9e-05	0.000926273	BP	25	G. hirsutum
GO:0044271	cellular nitrogen compound biosynthetic ...	2289	41	23.87	0.00016	0.00211582	BP	25	G. hirsutum
GO:0090407	organophosphate biosynthetic process	191	9	1.99	0.00017	0.002215	BP	25	G. hirsutum
GO:0015988	energy coupled proton transmembrane tran...	55	5	0.57	0.00026	0.00315562	BP	25	G. hirsutum
GO:0015991	ATP hydrolysis coupled proton transport	55	5	0.57	0.00026	0.00315562	BP	25	G. hirsutum
GO:0090662	ATP hydrolysis coupled transmembrane tra...	55	5	0.57	0.00026	0.00315562	BP	25	G. hirsutum
GO:0099131	ATP hydrolysis coupled ion transmembrane...	55	5	0.57	0.00026	0.00315562	BP	25	G. hirsutum
GO:0099132	ATP hydrolysis coupled cation transmembr...	55	5	0.57	0.00026	0.00315562	BP	25	G. hirsutum
GO:0006811	ion transport	419	13	4.37	0.00042	0.00502865	BP	25	G. hirsutum
GO:1901137	carbohydrate derivative biosynthetic pro...	244	9	2.54	0.00101	0.0119315	BP	25	G. hirsutum
GO:0044281	small molecule metabolic process	729	17	7.6	0.00143	0.0166708	BP	25	G. hirsutum
GO:0008535	respiratory chain complex IV assembly	6	2	0.06	0.00157	0.0180652	BP	25	G. hirsutum
GO:0017004	cytochrome complex assembly	8	2	0.08	0.0029	0.032941	BP	25	G. hirsutum
GO:0010467	gene expression	2253	36	23.49	0.00394	0.0441878	BP	25	G. hirsutum
GO:0034357	photosynthetic membrane	105	27	1.77	5.3e-26	1.2349e-23	CC	25	G. hirsutum
GO:0009579	thylakoid	111	27	1.88	2.8e-25	2.17467e-23	CC	25	G. hirsutum
GO:0044436	thylakoid part	111	27	1.88	2.8e-25	2.17467e-23	CC	25	G. hirsutum
GO:0098796	membrane protein complex	327	36	5.52	2e-21	1.165e-19	CC	25	G. hirsutum
GO:0009521	photosystem	99	23	1.67	5.3e-21	2.4698e-19	CC	25	G. hirsutum
GO:0032991	protein-containing complex	1267	55	21.41	1.1e-14	4.27167e-13	CC	25	G. hirsutum
GO:0009522	photosystem I	41	13	0.69	4.3e-14	1.43129e-12	CC	25	G. hirsutum
GO:0009536	plastid	47	12	0.79	7.9e-12	2.30088e-10	CC	25	G. hirsutum
GO:0033177	proton-transporting two-sector ATPase co...	46	10	0.78	2.7e-09	6.99e-08	CC	25	G. hirsutum
GO:0016469	proton-transporting two-sector ATPase co...	94	13	1.59	3.6e-09	8.388e-08	CC	25	G. hirsutum
GO:0044424	intracellular part	2481	68	41.92	4e-09	8.47273e-08	CC	25	G. hirsutum
GO:0045259	proton-transporting ATP synthase complex	38	9	0.64	8e-09	1.55333e-07	CC	25	G. hirsutum
GO:0045263	proton-transporting ATP synthase complex...	21	7	0.35	2.9e-08	5.19769e-07	CC	25	G. hirsutum
GO:0009507	chloroplast	35	8	0.59	7.7e-08	1.2815e-06	CC	25	G. hirsutum
GO:0044425	membrane part	1223	43	20.66	1.2e-07	1.864e-06	CC	25	G. hirsutum
GO:0005622	intracellular	2903	68	49.05	1e-05	0.000145625	CC	25	G. hirsutum
GO:0044444	cytoplasmic part	931	32	15.73	2.3e-05	0.000315235	CC	25	G. hirsutum
GO:0005840	ribosome	481	20	8.13	0.0001	0.0012815	CC	25	G. hirsutum
GO:0005623	cell	3058	68	51.67	0.00011	0.0012815	CC	25	G. hirsutum
GO:0044464	cell part	3058	68	51.67	0.00011	0.0012815	CC	25	G. hirsutum
GO:1990904	ribonucleoprotein complex	507	20	8.57	0.00022	0.00244095	CC	25	G. hirsutum
GO:0042651	thylakoid membrane	30	4	0.51	0.00149	0.0157805	CC	25	G. hirsutum
GO:0016020	membrane	2347	53	39.65	0.00241	0.0244143	CC	25	G. hirsutum
GO:0043228	non-membrane-bounded organelle	643	20	10.86	0.0043	0.040076	CC	25	G. hirsutum
GO:0043232	intracellular non-membrane-bounded organ...	643	20	10.86	0.0043	0.040076	CC	25	G. hirsutum
GO:0005737	cytoplasm	1287	33	21.74	0.00465	0.0416712	CC	25	G. hirsutum
GO:0000902	cell morphogenesis	28	3	0.12	0.0002	0.0444	BP	28	G. hirsutum
GO:0009653	anatomical structure morphogenesis	28	3	0.12	0.0002	0.0444	BP	28	G. hirsutum
GO:0032989	cellular component morphogenesis	28	3	0.12	0.0002	0.0444	BP	28	G. hirsutum
GO:0048869	cellular developmental process	28	3	0.12	0.0002	0.0444	BP	28	G. hirsutum
GO:0051082	unfolded protein binding	56	9	0.19	1.6e-13	1.0112e-10	MF	31	G. hirsutum
GO:0005515	protein binding	3489	27	11.56	2.7e-06	0.0008216	MF	31	G. hirsutum
GO:0031072	heat shock protein binding	128	6	0.42	3.9e-06	0.0008216	MF	31	G. hirsutum
GO:0005488	binding	10185	47	33.75	2.5e-05	0.00395	MF	31	G. hirsutum
GO:0008047	enzyme activator activity	5	2	0.02	0.00011	0.013904	MF	31	G. hirsutum
GO:0006457	protein folding	132	15	0.5	4.5e-19	3.996e-16	BP	31	G. hirsutum
GO:0000902	cell morphogenesis	28	3	0.11	0.00015	0.02664	BP	31	G. hirsutum
GO:0009653	anatomical structure morphogenesis	28	3	0.11	0.00015	0.02664	BP	31	G. hirsutum
GO:0032989	cellular component morphogenesis	28	3	0.11	0.00015	0.02664	BP	31	G. hirsutum
GO:0048869	cellular developmental process	28	3	0.11	0.00015	0.02664	BP	31	G. hirsutum
GO:0005507	copper ion binding	125	6	0.46	6.5e-06	0.004108	MF	32	G. hirsutum
GO:0006886	intracellular protein transport	190	6	0.65	4.1e-05	0.0122544	BP	33	G. hirsutum
GO:0046907	intracellular transport	208	6	0.71	6.7e-05	0.0122544	BP	33	G. hirsutum
GO:0051649	establishment of localization in cell	208	6	0.71	6.7e-05	0.0122544	BP	33	G. hirsutum
GO:0034613	cellular protein localization	209	6	0.71	6.9e-05	0.0122544	BP	33	G. hirsutum
GO:0070727	cellular macromolecule localization	209	6	0.71	6.9e-05	0.0122544	BP	33	G. hirsutum
GO:0015031	protein transport	235	6	0.8	0.00013	0.01776	BP	33	G. hirsutum
GO:0045184	establishment of protein localization	242	6	0.83	0.00016	0.01776	BP	33	G. hirsutum
GO:0051641	cellular localization	242	6	0.83	0.00016	0.01776	BP	33	G. hirsutum
GO:0008104	protein localization	258	6	0.88	0.00022	0.0217067	BP	33	G. hirsutum
GO:0033036	macromolecule localization	266	6	0.91	0.00026	0.023088	BP	33	G. hirsutum
GO:0015833	peptide transport	302	6	1.03	0.00051	0.0362031	BP	33	G. hirsutum
GO:0042886	amide transport	302	6	1.03	0.00051	0.0362031	BP	33	G. hirsutum
GO:0071705	nitrogen compound transport	304	6	1.04	0.00053	0.0362031	BP	33	G. hirsutum
GO:0003700	DNA-binding transcription factor activit...	717	18	2.28	2.8e-12	1.264e-09	MF	34	G. hirsutum
GO:0140110	transcription regulator activity	733	18	2.34	4e-12	1.264e-09	MF	34	G. hirsutum
GO:0006355	regulation of transcription, DNA-templat...	1253	21	3.73	1.4e-12	1.5984e-10	BP	34	G. hirsutum
GO:0051252	regulation of RNA metabolic process	1253	21	3.73	1.4e-12	1.5984e-10	BP	34	G. hirsutum
GO:1903506	regulation of nucleic acid-templated tra...	1253	21	3.73	1.4e-12	1.5984e-10	BP	34	G. hirsutum
GO:2001141	regulation of RNA biosynthetic process	1253	21	3.73	1.4e-12	1.5984e-10	BP	34	G. hirsutum
GO:0019219	regulation of nucleobase-containing comp...	1257	21	3.75	1.5e-12	1.5984e-10	BP	34	G. hirsutum
GO:0009889	regulation of biosynthetic process	1272	21	3.79	1.9e-12	1.5984e-10	BP	34	G. hirsutum
GO:0010556	regulation of macromolecule biosynthetic...	1272	21	3.79	1.9e-12	1.5984e-10	BP	34	G. hirsutum
GO:0031326	regulation of cellular biosynthetic proc...	1272	21	3.79	1.9e-12	1.5984e-10	BP	34	G. hirsutum
GO:2000112	regulation of cellular macromolecule bio...	1272	21	3.79	1.9e-12	1.5984e-10	BP	34	G. hirsutum
GO:0010468	regulation of gene expression	1273	21	3.79	1.9e-12	1.5984e-10	BP	34	G. hirsutum
GO:0031323	regulation of cellular metabolic process	1291	21	3.85	2.5e-12	1.5984e-10	BP	34	G. hirsutum
GO:0051171	regulation of nitrogen compound metaboli...	1291	21	3.85	2.5e-12	1.5984e-10	BP	34	G. hirsutum
GO:0080090	regulation of primary metabolic process	1291	21	3.85	2.5e-12	1.5984e-10	BP	34	G. hirsutum
GO:0060255	regulation of macromolecule metabolic pr...	1295	21	3.86	2.6e-12	1.5984e-10	BP	34	G. hirsutum
GO:0019222	regulation of metabolic process	1297	21	3.86	2.7e-12	1.5984e-10	BP	34	G. hirsutum
GO:0006351	transcription, DNA-templated	1415	21	4.22	1.5e-11	7.4e-10	BP	34	G. hirsutum
GO:0097659	nucleic acid-templated transcription	1415	21	4.22	1.5e-11	7.4e-10	BP	34	G. hirsutum
GO:0032774	RNA biosynthetic process	1417	21	4.22	1.5e-11	7.4e-10	BP	34	G. hirsutum
GO:0034654	nucleobase-containing compound biosynthe...	1558	21	4.64	9.5e-11	4.44e-09	BP	34	G. hirsutum
GO:0019438	aromatic compound biosynthetic process	1650	21	4.92	2.9e-10	1.2876e-08	BP	34	G. hirsutum
GO:0018130	heterocycle biosynthetic process	1657	21	4.94	3.1e-10	1.31086e-08	BP	34	G. hirsutum
GO:0016070	RNA metabolic process	1719	21	5.12	6.2e-10	2.50255e-08	BP	34	G. hirsutum
GO:0090304	nucleic acid metabolic process	1976	22	5.89	1e-09	3.86087e-08	BP	34	G. hirsutum
GO:1901362	organic cyclic compound biosynthetic pro...	1778	21	5.3	1.2e-09	4.44e-08	BP	34	G. hirsutum
GO:0050794	regulation of cellular process	1818	21	5.42	1.8e-09	6.3936e-08	BP	34	G. hirsutum
GO:0050789	regulation of biological process	1840	21	5.48	2.2e-09	7.51385e-08	BP	34	G. hirsutum
GO:0065007	biological regulation	1947	21	5.8	6.4e-09	2.10489e-07	BP	34	G. hirsutum
GO:0006139	nucleobase-containing compound metabolic...	2248	22	6.7	1.3e-08	4.12286e-07	BP	34	G. hirsutum
GO:0046483	heterocycle metabolic process	2352	22	7.01	3e-08	9.176e-07	BP	34	G. hirsutum
GO:0006725	cellular aromatic compound metabolic pro...	2353	22	7.01	3.1e-08	9.176e-07	BP	34	G. hirsutum
GO:1901360	organic cyclic compound metabolic proces...	2464	22	7.34	7.4e-08	2.11974e-06	BP	34	G. hirsutum
GO:0010467	gene expression	2253	21	6.71	9.4e-08	2.6085e-06	BP	34	G. hirsutum
GO:0044271	cellular nitrogen compound biosynthetic ...	2289	21	6.82	1.3e-07	3.49818e-06	BP	34	G. hirsutum
GO:0034645	cellular macromolecule biosynthetic proc...	2333	21	6.95	1.8e-07	4.56686e-06	BP	34	G. hirsutum
GO:0009059	macromolecule biosynthetic process	2336	21	6.96	1.8e-07	4.56686e-06	BP	34	G. hirsutum
GO:0044260	cellular macromolecule metabolic process	4378	27	13.04	1.2e-06	2.96e-05	BP	34	G. hirsutum
GO:0034641	cellular nitrogen compound metabolic pro...	2926	22	8.72	1.8e-06	4.32e-05	BP	34	G. hirsutum
GO:0043170	macromolecule metabolic process	5021	28	14.96	5e-06	0.000116842	BP	34	G. hirsutum
GO:0044249	cellular biosynthetic process	2836	21	8.45	5.4e-06	0.000122954	BP	34	G. hirsutum
GO:1901576	organic substance biosynthetic process	2931	21	8.73	9.5e-06	0.0002109	BP	34	G. hirsutum
GO:0009058	biosynthetic process	3114	21	9.28	2.6e-05	0.000563122	BP	34	G. hirsutum
GO:0044237	cellular metabolic process	5724	27	17.05	0.00043	0.00909143	BP	34	G. hirsutum
GO:0006807	nitrogen compound metabolic process	5431	26	16.18	0.00056	0.0115647	BP	34	G. hirsutum
GO:0044238	primary metabolic process	6385	28	19.02	0.00112	0.0226036	BP	34	G. hirsutum
GO:0071704	organic substance metabolic process	6565	28	19.56	0.002	0.0394667	BP	34	G. hirsutum
GO:0005576	extracellular region	59	3	0.09	8.2e-05	0.019106	CC	34	G. hirsutum
GO:0043531	ADP binding	272	8	0.61	1.2e-07	7.584e-05	MF	38	G. hirsutum
GO:0016706	oxidoreductase activity, acting on paire...	162	5	0.4	4.8e-05	0.030336	MF	40	G. hirsutum
GO:0051213	dioxygenase activity	190	5	0.47	0.0001	0.0316	MF	40	G. hirsutum
GO:0010333	terpene synthase activity	38	3	0.08	6.2e-05	0.02844	MF	42	G. hirsutum
GO:0016838	carbon-oxygen lyase activity, acting on ...	43	3	0.09	9e-05	0.02844	MF	42	G. hirsutum
GO:0004332	fructose-bisphosphate aldolase activity	8	3	0.02	3.9e-07	0.00024648	MF	48	G. hirsutum
GO:0016832	aldehyde-lyase activity	11	3	0.02	1.1e-06	0.0003476	MF	48	G. hirsutum
GO:0015979	photosynthesis	132	12	0.39	1.5e-15	1.332e-12	BP	48	G. hirsutum
GO:0017144	drug metabolic process	222	6	0.66	4.3e-05	0.0154831	BP	48	G. hirsutum
GO:0006754	ATP biosynthetic process	93	4	0.28	0.00016	0.0154831	BP	48	G. hirsutum
GO:0008152	metabolic process	8883	34	26.47	0.0002	0.0154831	BP	48	G. hirsutum
GO:0009142	nucleoside triphosphate biosynthetic pro...	99	4	0.29	0.0002	0.0154831	BP	48	G. hirsutum
GO:0009145	purine nucleoside triphosphate biosynthe...	99	4	0.29	0.0002	0.0154831	BP	48	G. hirsutum
GO:0009201	ribonucleoside triphosphate biosynthetic...	99	4	0.29	0.0002	0.0154831	BP	48	G. hirsutum
GO:0009206	purine ribonucleoside triphosphate biosy...	99	4	0.29	0.0002	0.0154831	BP	48	G. hirsutum
GO:0009127	purine nucleoside monophosphate biosynth...	102	4	0.3	0.00023	0.0154831	BP	48	G. hirsutum
GO:0009168	purine ribonucleoside monophosphate bios...	102	4	0.3	0.00023	0.0154831	BP	48	G. hirsutum
GO:0009156	ribonucleoside monophosphate biosyntheti...	105	4	0.31	0.00025	0.0154831	BP	48	G. hirsutum
GO:0009124	nucleoside monophosphate biosynthetic pr...	108	4	0.32	0.00028	0.0154831	BP	48	G. hirsutum
GO:0009152	purine ribonucleotide biosynthetic proce...	110	4	0.33	0.0003	0.0154831	BP	48	G. hirsutum
GO:0009260	ribonucleotide biosynthetic process	113	4	0.34	0.00034	0.0154831	BP	48	G. hirsutum
GO:0046390	ribose phosphate biosynthetic process	113	4	0.34	0.00034	0.0154831	BP	48	G. hirsutum
GO:0006164	purine nucleotide biosynthetic process	114	4	0.34	0.00035	0.0154831	BP	48	G. hirsutum
GO:0072522	purine-containing compound biosynthetic ...	116	4	0.35	0.00037	0.0154831	BP	48	G. hirsutum
GO:0006096	glycolytic process	52	3	0.15	0.00048	0.0154831	BP	48	G. hirsutum
GO:0006757	ATP generation from ADP	52	3	0.15	0.00048	0.0154831	BP	48	G. hirsutum
GO:0009135	purine nucleoside diphosphate metabolic ...	52	3	0.15	0.00048	0.0154831	BP	48	G. hirsutum
GO:0009166	nucleotide catabolic process	52	3	0.15	0.00048	0.0154831	BP	48	G. hirsutum
GO:0009179	purine ribonucleoside diphosphate metabo...	52	3	0.15	0.00048	0.0154831	BP	48	G. hirsutum
GO:0009185	ribonucleoside diphosphate metabolic pro...	52	3	0.15	0.00048	0.0154831	BP	48	G. hirsutum
GO:0042866	pyruvate biosynthetic process	52	3	0.15	0.00048	0.0154831	BP	48	G. hirsutum
GO:0046031	ADP metabolic process	52	3	0.15	0.00048	0.0154831	BP	48	G. hirsutum
GO:1901292	nucleoside phosphate catabolic process	52	3	0.15	0.00048	0.0154831	BP	48	G. hirsutum
GO:0046034	ATP metabolic process	127	4	0.38	0.00052	0.0154831	BP	48	G. hirsutum
GO:0006090	pyruvate metabolic process	55	3	0.16	0.00057	0.0154831	BP	48	G. hirsutum
GO:0019359	nicotinamide nucleotide biosynthetic pro...	56	3	0.17	0.0006	0.0154831	BP	48	G. hirsutum
GO:0019363	pyridine nucleotide biosynthetic process	56	3	0.17	0.0006	0.0154831	BP	48	G. hirsutum
GO:0009165	nucleotide biosynthetic process	134	4	0.4	0.00064	0.0154831	BP	48	G. hirsutum
GO:0006165	nucleoside diphosphate phosphorylation	58	3	0.17	0.00067	0.0154831	BP	48	G. hirsutum
GO:0046434	organophosphate catabolic process	58	3	0.17	0.00067	0.0154831	BP	48	G. hirsutum
GO:0046939	nucleotide phosphorylation	58	3	0.17	0.00067	0.0154831	BP	48	G. hirsutum
GO:0009126	purine nucleoside monophosphate metaboli...	136	4	0.41	0.00068	0.0154831	BP	48	G. hirsutum
GO:0009144	purine nucleoside triphosphate metabolic...	136	4	0.41	0.00068	0.0154831	BP	48	G. hirsutum
GO:0009167	purine ribonucleoside monophosphate meta...	136	4	0.41	0.00068	0.0154831	BP	48	G. hirsutum
GO:0009199	ribonucleoside triphosphate metabolic pr...	136	4	0.41	0.00068	0.0154831	BP	48	G. hirsutum
GO:0009205	purine ribonucleoside triphosphate metab...	136	4	0.41	0.00068	0.0154831	BP	48	G. hirsutum
GO:0009141	nucleoside triphosphate metabolic proces...	137	4	0.41	0.0007	0.01554	BP	48	G. hirsutum
GO:1901293	nucleoside phosphate biosynthetic proces...	138	4	0.41	0.00072	0.01554	BP	48	G. hirsutum
GO:0009161	ribonucleoside monophosphate metabolic p...	139	4	0.41	0.00074	0.01554	BP	48	G. hirsutum
GO:0034655	nucleobase-containing compound catabolic...	61	3	0.18	0.00077	0.01554	BP	48	G. hirsutum
GO:0072525	pyridine-containing compound biosyntheti...	61	3	0.18	0.00077	0.01554	BP	48	G. hirsutum
GO:0009123	nucleoside monophosphate metabolic proce...	142	4	0.42	0.0008	0.0157867	BP	48	G. hirsutum
GO:0009132	nucleoside diphosphate metabolic process	63	3	0.19	0.00085	0.0164087	BP	48	G. hirsutum
GO:0034404	nucleobase-containing small molecule bio...	65	3	0.19	0.00093	0.0175711	BP	48	G. hirsutum
GO:0044270	cellular nitrogen compound catabolic pro...	69	3	0.21	0.00111	0.020535	BP	48	G. hirsutum
GO:0019439	aromatic compound catabolic process	71	3	0.21	0.0012	0.0217469	BP	48	G. hirsutum
GO:0046700	heterocycle catabolic process	72	3	0.21	0.00125	0.0222	BP	48	G. hirsutum
GO:0009150	purine ribonucleotide metabolic process	162	4	0.48	0.0013	0.0222	BP	48	G. hirsutum
GO:1901361	organic cyclic compound catabolic proces...	73	3	0.22	0.0013	0.0222	BP	48	G. hirsutum
GO:0009259	ribonucleotide metabolic process	165	4	0.49	0.00139	0.0229265	BP	48	G. hirsutum
GO:0016052	carbohydrate catabolic process	75	3	0.22	0.00141	0.0229265	BP	48	G. hirsutum
GO:0006163	purine nucleotide metabolic process	166	4	0.49	0.00142	0.0229265	BP	48	G. hirsutum
GO:0072521	purine-containing compound metabolic pro...	168	4	0.5	0.00149	0.0236271	BP	48	G. hirsutum
GO:0019362	pyridine nucleotide metabolic process	81	3	0.24	0.00176	0.0269462	BP	48	G. hirsutum
GO:0046496	nicotinamide nucleotide metabolic proces...	81	3	0.24	0.00176	0.0269462	BP	48	G. hirsutum
GO:0006733	oxidoreduction coenzyme metabolic proces...	82	3	0.24	0.00182	0.0273925	BP	48	G. hirsutum
GO:0072524	pyridine-containing compound metabolic p...	86	3	0.26	0.00209	0.030932	BP	48	G. hirsutum
GO:0019693	ribose phosphate metabolic process	190	4	0.57	0.00234	0.0340643	BP	48	G. hirsutum
GO:0090407	organophosphate biosynthetic process	191	4	0.57	0.00238	0.0340877	BP	48	G. hirsutum
GO:0009108	coenzyme biosynthetic process	91	3	0.27	0.00245	0.0345333	BP	48	G. hirsutum
GO:0001505	regulation of neurotransmitter levels	26	2	0.08	0.00268	0.0360582	BP	48	G. hirsutum
GO:0006544	glycine metabolic process	26	2	0.08	0.00268	0.0360582	BP	48	G. hirsutum
GO:0042133	neurotransmitter metabolic process	26	2	0.08	0.00268	0.0360582	BP	48	G. hirsutum
GO:0009117	nucleotide metabolic process	212	4	0.63	0.00347	0.0459904	BP	48	G. hirsutum
GO:0009521	photosystem	99	12	0.3	7.4e-19	1.7242e-16	CC	48	G. hirsutum
GO:0034357	photosynthetic membrane	105	12	0.31	1.6e-18	1.80575e-16	CC	48	G. hirsutum
GO:0009579	thylakoid	111	12	0.33	3.1e-18	1.80575e-16	CC	48	G. hirsutum
GO:0044436	thylakoid part	111	12	0.33	3.1e-18	1.80575e-16	CC	48	G. hirsutum
GO:0098796	membrane protein complex	327	13	0.97	2.7e-14	1.2582e-12	CC	48	G. hirsutum
GO:0009522	photosystem I	41	8	0.12	5.8e-14	2.25233e-12	CC	48	G. hirsutum
GO:0009538	photosystem I reaction center	10	5	0.03	2.8e-11	9.32e-10	CC	48	G. hirsutum
GO:0032991	protein-containing complex	1267	14	3.78	4.5e-08	1.31063e-06	CC	48	G. hirsutum
GO:0044425	membrane part	1223	13	3.65	6.2e-07	1.60511e-05	CC	48	G. hirsutum
GO:0009523	photosystem II	46	4	0.14	7.8e-06	0.00018174	CC	48	G. hirsutum
GO:0044424	intracellular part	2481	15	7.4	2.4e-05	0.000508364	CC	48	G. hirsutum
GO:1990204	oxidoreductase complex	27	3	0.08	6e-05	0.001165	CC	48	G. hirsutum
GO:0005622	intracellular	2903	15	8.66	0.00026	0.00466	CC	48	G. hirsutum
GO:0005623	cell	3058	15	9.12	0.00056	0.00869867	CC	48	G. hirsutum
GO:0044464	cell part	3058	15	9.12	0.00056	0.00869867	CC	48	G. hirsutum
GO:0019898	extrinsic component of membrane	20	2	0.06	0.00153	0.0222806	CC	48	G. hirsutum
GO:0016020	membrane	2347	13	7	0.00165	0.0226147	CC	48	G. hirsutum
GO:0009654	photosystem II oxygen evolving complex	22	2	0.07	0.00185	0.0239472	CC	48	G. hirsutum
GO:0042651	thylakoid membrane	30	2	0.09	0.00344	0.0421853	CC	48	G. hirsutum
GO:0005375	copper ion transmembrane transporter act...	11	2	0.01	7.6e-05	0.048032	MF	51	G. hirsutum
GO:0035434	copper ion transmembrane transport	11	2	0.01	7.6e-05	0.04884	BP	51	G. hirsutum
GO:0006825	copper ion transport	13	2	0.02	0.00011	0.04884	BP	51	G. hirsutum
GO:0008898	S-adenosylmethionine-homocysteine S-meth...	5	3	0.01	7.7e-08	4.8664e-05	MF	58	G. hirsutum
GO:0008172	S-methyltransferase activity	14	3	0.03	2.8e-06	0.0008848	MF	58	G. hirsutum
GO:0015035	protein disulfide oxidoreductase activit...	55	3	0.07	4.5e-05	0.02844	MF	68	G. hirsutum
GO:0010333	terpene synthase activity	38	3	0.03	2.8e-06	0.0012956	MF	70	G. hirsutum
GO:0016838	carbon-oxygen lyase activity, acting on ...	43	3	0.03	4.1e-06	0.0012956	MF	70	G. hirsutum
GO:0016835	carbon-oxygen lyase activity	77	3	0.06	2.4e-05	0.005056	MF	70	G. hirsutum
GO:0000287	magnesium ion binding	102	3	0.08	5.6e-05	0.008848	MF	70	G. hirsutum
GO:0017076	purine nucleotide binding	3063	547	461.61	1.3e-06	0.0006004	MF	1	G. barbadense
GO:0032553	ribonucleotide binding	3072	546	462.96	2.5e-06	0.0006004	MF	1	G. barbadense
GO:0097367	carbohydrate derivative binding	3088	547	465.37	3.7e-06	0.0006004	MF	1	G. barbadense
GO:0032555	purine ribonucleotide binding	3051	541	459.8	3.8e-06	0.0006004	MF	1	G. barbadense
GO:0036094	small molecule binding	3543	613	533.94	1.7e-05	0.00196622	MF	1	G. barbadense
GO:0035639	purine ribonucleoside triphosphate bindi...	2793	492	420.92	2.5e-05	0.00196622	MF	1	G. barbadense
GO:0017111	nucleoside-triphosphatase activity	798	162	120.26	2.7e-05	0.00196622	MF	1	G. barbadense
GO:0000166	nucleotide binding	3380	585	509.38	2.8e-05	0.00196622	MF	1	G. barbadense
GO:1901265	nucleoside phosphate binding	3380	585	509.38	2.8e-05	0.00196622	MF	1	G. barbadense
GO:0043168	anion binding	3484	601	525.05	3.2e-05	0.0020224	MF	1	G. barbadense
GO:0019001	guanyl nucleotide binding	346	79	52.14	7.3e-05	0.00361143	MF	1	G. barbadense
GO:0004576	oligosaccharyl transferase activity	12	8	1.81	7.4e-05	0.00361143	MF	1	G. barbadense
GO:0016462	pyrophosphatase activity	819	163	123.43	7.6e-05	0.00361143	MF	1	G. barbadense
GO:0016817	hydrolase activity, acting on acid anhyd...	840	166	126.59	9.5e-05	0.00361143	MF	1	G. barbadense
GO:0003824	catalytic activity	8517	1367	1283.55	9.9e-05	0.00361143	MF	1	G. barbadense
GO:0001883	purine nucleoside binding	340	77	51.24	0.00012	0.00361143	MF	1	G. barbadense
GO:0005525	GTP binding	340	77	51.24	0.00012	0.00361143	MF	1	G. barbadense
GO:0032549	ribonucleoside binding	340	77	51.24	0.00012	0.00361143	MF	1	G. barbadense
GO:0032550	purine ribonucleoside binding	340	77	51.24	0.00012	0.00361143	MF	1	G. barbadense
GO:0032561	guanyl ribonucleotide binding	340	77	51.24	0.00012	0.00361143	MF	1	G. barbadense
GO:0003887	DNA-directed DNA polymerase activity	22	11	3.32	0.00012	0.00361143	MF	1	G. barbadense
GO:0001882	nucleoside binding	341	77	51.39	0.00013	0.00373455	MF	1	G. barbadense
GO:0016818	hydrolase activity, acting on acid anhyd...	838	164	126.29	0.00017	0.0046713	MF	1	G. barbadense
GO:0003924	GTPase activity	201	50	30.29	0.00018	0.00474	MF	1	G. barbadense
GO:0034061	DNA polymerase activity	23	11	3.47	0.00021	0.0053088	MF	1	G. barbadense
GO:0016787	hydrolase activity	2543	442	383.24	0.00025	0.00607692	MF	1	G. barbadense
GO:0140097	catalytic activity, acting on DNA	139	37	20.95	0.00029	0.00678815	MF	1	G. barbadense
GO:0016740	transferase activity	3119	532	470.05	0.00034	0.00767429	MF	1	G. barbadense
GO:0030554	adenyl nucleotide binding	2721	468	410.07	0.00042	0.0091531	MF	1	G. barbadense
GO:0032559	adenyl ribonucleotide binding	2715	464	409.16	0.00077	0.0162213	MF	1	G. barbadense
GO:0003905	alkylbase DNA N-glycosylase activity	7	5	1.05	0.00125	0.0254839	MF	1	G. barbadense
GO:0140098	catalytic activity, acting on RNA	278	61	41.9	0.00132	0.02607	MF	1	G. barbadense
GO:0060590	ATPase regulator activity	10	6	1.51	0.00141	0.0270036	MF	1	G. barbadense
GO:0016779	nucleotidyltransferase activity	193	45	29.09	0.00154	0.0286259	MF	1	G. barbadense
GO:0140101	catalytic activity, acting on a tRNA	121	31	18.24	0.00168	0.030336	MF	1	G. barbadense
GO:0003684	damaged DNA binding	17	8	2.56	0.00178	0.0312489	MF	1	G. barbadense
GO:0004579	dolichyl-diphosphooligosaccharide-protei...	8	5	1.21	0.00291	0.0473229	MF	1	G. barbadense
GO:0019104	DNA N-glycosylase activity	8	5	1.21	0.00291	0.0473229	MF	1	G. barbadense
GO:0003854	3-beta-hydroxy-delta5-steroid dehydrogen...	100	26	15.07	0.00307	0.0473229	MF	1	G. barbadense
GO:0016229	steroid dehydrogenase activity	100	26	15.07	0.00307	0.0473229	MF	1	G. barbadense
GO:0033764	steroid dehydrogenase activity, acting o...	100	26	15.07	0.00307	0.0473229	MF	1	G. barbadense
GO:0016192	vesicle-mediated transport	191	51	29.69	4.6e-05	0.024864	BP	1	G. barbadense
GO:0051641	cellular localization	242	60	37.62	0.00011	0.024864	BP	1	G. barbadense
GO:0006259	DNA metabolic process	270	65	41.97	0.00014	0.024864	BP	1	G. barbadense
GO:0034613	cellular protein localization	209	53	32.49	0.00014	0.024864	BP	1	G. barbadense
GO:0070727	cellular macromolecule localization	209	53	32.49	0.00014	0.024864	BP	1	G. barbadense
GO:0019538	protein metabolic process	2988	523	464.49	0.00037	0.037296	BP	1	G. barbadense
GO:0008610	lipid biosynthetic process	311	71	48.35	0.0004	0.037296	BP	1	G. barbadense
GO:0051716	cellular response to stimulus	621	127	96.53	0.00048	0.037296	BP	1	G. barbadense
GO:0006260	DNA replication	65	21	10.1	0.00057	0.037296	BP	1	G. barbadense
GO:0006886	intracellular protein transport	190	47	29.54	0.00061	0.037296	BP	1	G. barbadense
GO:0006281	DNA repair	175	44	27.2	0.00062	0.037296	BP	1	G. barbadense
GO:0006974	cellular response to DNA damage stimulus	176	44	27.36	0.00071	0.037296	BP	1	G. barbadense
GO:0033554	cellular response to stress	176	44	27.36	0.00071	0.037296	BP	1	G. barbadense
GO:0046907	intracellular transport	208	50	32.33	0.00083	0.037296	BP	1	G. barbadense
GO:0051649	establishment of localization in cell	208	50	32.33	0.00083	0.037296	BP	1	G. barbadense
GO:1901564	organonitrogen compound metabolic proces...	3556	610	552.78	0.00083	0.037296	BP	1	G. barbadense
GO:0006486	protein glycosylation	58	19	9.02	0.00084	0.037296	BP	1	G. barbadense
GO:0009100	glycoprotein metabolic process	58	19	9.02	0.00084	0.037296	BP	1	G. barbadense
GO:0009101	glycoprotein biosynthetic process	58	19	9.02	0.00084	0.037296	BP	1	G. barbadense
GO:0043413	macromolecule glycosylation	58	19	9.02	0.00084	0.037296	BP	1	G. barbadense
GO:0012505	endomembrane system	195	54	31.9	3.2e-05	0.007456	CC	1	G. barbadense
GO:0030117	membrane coat	78	26	12.76	0.00016	0.0124267	CC	1	G. barbadense
GO:0048475	coated membrane	78	26	12.76	0.00016	0.0124267	CC	1	G. barbadense
GO:0003723	RNA binding	391	64	31.14	2.2e-08	1.3904e-05	MF	2	G. barbadense
GO:0003735	structural constituent of ribosome	481	73	38.31	5.8e-08	1.8328e-05	MF	2	G. barbadense
GO:0005198	structural molecule activity	548	75	43.65	2.4e-06	0.0005056	MF	2	G. barbadense
GO:0003676	nucleic acid binding	2686	265	213.95	5.6e-05	0.008848	MF	2	G. barbadense
GO:0043043	peptide biosynthetic process	639	91	48.21	1.5e-09	7.326e-07	BP	2	G. barbadense
GO:0006412	translation	635	90	47.91	2.4e-09	7.326e-07	BP	2	G. barbadense
GO:0006518	peptide metabolic process	647	91	48.81	2.9e-09	7.326e-07	BP	2	G. barbadense
GO:1901566	organonitrogen compound biosynthetic pro...	1056	131	79.67	3.3e-09	7.326e-07	BP	2	G. barbadense
GO:0043604	amide biosynthetic process	662	92	49.95	4.4e-09	7.8144e-07	BP	2	G. barbadense
GO:0043603	cellular amide metabolic process	679	93	51.23	7.5e-09	1.11e-06	BP	2	G. barbadense
GO:0009987	cellular process	6807	586	513.57	7.1e-08	9.00686e-06	BP	2	G. barbadense
GO:0034641	cellular nitrogen compound metabolic pro...	2926	276	220.76	6.8e-06	0.0007548	BP	2	G. barbadense
GO:0044237	cellular metabolic process	5724	489	431.86	2.9e-05	0.00286133	BP	2	G. barbadense
GO:0006807	nitrogen compound metabolic process	5431	465	409.75	5.2e-05	0.00444	BP	2	G. barbadense
GO:1901564	organonitrogen compound metabolic proces...	3556	320	268.29	5.5e-05	0.00444	BP	2	G. barbadense
GO:0044267	cellular protein metabolic process	2550	236	192.39	0.00016	0.01184	BP	2	G. barbadense
GO:0006281	DNA repair	175	26	13.2	0.00065	0.042032	BP	2	G. barbadense
GO:0006974	cellular response to DNA damage stimulus	176	26	13.28	0.00071	0.042032	BP	2	G. barbadense
GO:0033554	cellular response to stress	176	26	13.28	0.00071	0.042032	BP	2	G. barbadense
GO:0006605	protein targeting	28	8	2.11	0.00081	0.0444	BP	2	G. barbadense
GO:0006457	protein folding	132	21	9.96	0.00085	0.0444	BP	2	G. barbadense
GO:0009451	RNA modification	57	12	4.3	0.00094	0.0444	BP	2	G. barbadense
GO:0019538	protein metabolic process	2988	265	225.44	0.00095	0.0444	BP	2	G. barbadense
GO:0009056	catabolic process	331	41	24.97	0.0011	0.04884	BP	2	G. barbadense
GO:0005622	intracellular	2903	312	260.24	1e-07	2.33e-05	CC	2	G. barbadense
GO:1990904	ribonucleoprotein complex	507	79	45.45	2.4e-07	2.796e-05	CC	2	G. barbadense
GO:0005737	cytoplasm	1287	160	115.37	6.4e-07	4.2872e-05	CC	2	G. barbadense
GO:0005623	cell	3058	321	274.13	9.2e-07	4.2872e-05	CC	2	G. barbadense
GO:0044464	cell part	3058	321	274.13	9.2e-07	4.2872e-05	CC	2	G. barbadense
GO:0005840	ribosome	481	73	43.12	2.2e-06	8.54333e-05	CC	2	G. barbadense
GO:0044444	cytoplasmic part	931	117	83.46	2.6e-05	0.000865429	CC	2	G. barbadense
GO:0044424	intracellular part	2481	260	222.41	0.00012	0.003495	CC	2	G. barbadense
GO:0043228	non-membrane-bounded organelle	643	83	57.64	0.00022	0.005126	CC	2	G. barbadense
GO:0043232	intracellular non-membrane-bounded organ...	643	83	57.64	0.00022	0.005126	CC	2	G. barbadense
GO:0032991	protein-containing complex	1267	142	113.58	0.00093	0.0196991	CC	2	G. barbadense
GO:0043226	organelle	1818	191	162.97	0.00252	0.0451662	CC	2	G. barbadense
GO:0043229	intracellular organelle	1818	191	162.97	0.00252	0.0451662	CC	2	G. barbadense
GO:0005975	carbohydrate metabolic process	719	84	54.75	4.2e-05	0.02664	BP	3	G. barbadense
GO:0005976	polysaccharide metabolic process	200	30	15.23	0.00026	0.02664	BP	3	G. barbadense
GO:0010468	regulation of gene expression	1273	129	96.94	0.00032	0.02664	BP	3	G. barbadense
GO:0006355	regulation of transcription, DNA-templat...	1253	127	95.41	0.00035	0.02664	BP	3	G. barbadense
GO:0051252	regulation of RNA metabolic process	1253	127	95.41	0.00035	0.02664	BP	3	G. barbadense
GO:1903506	regulation of nucleic acid-templated tra...	1253	127	95.41	0.00035	0.02664	BP	3	G. barbadense
GO:2001141	regulation of RNA biosynthetic process	1253	127	95.41	0.00035	0.02664	BP	3	G. barbadense
GO:0019219	regulation of nucleobase-containing comp...	1257	127	95.72	0.0004	0.02664	BP	3	G. barbadense
GO:0060255	regulation of macromolecule metabolic pr...	1295	130	98.61	0.00045	0.02664	BP	3	G. barbadense
GO:0009889	regulation of biosynthetic process	1272	128	96.86	0.00045	0.02664	BP	3	G. barbadense
GO:0010556	regulation of macromolecule biosynthetic...	1272	128	96.86	0.00045	0.02664	BP	3	G. barbadense
GO:0031326	regulation of cellular biosynthetic proc...	1272	128	96.86	0.00045	0.02664	BP	3	G. barbadense
GO:2000112	regulation of cellular macromolecule bio...	1272	128	96.86	0.00045	0.02664	BP	3	G. barbadense
GO:0019222	regulation of metabolic process	1297	130	98.76	0.00048	0.02664	BP	3	G. barbadense
GO:0006073	cellular glucan metabolic process	101	18	7.69	0.00056	0.02664	BP	3	G. barbadense
GO:0044042	glucan metabolic process	101	18	7.69	0.00056	0.02664	BP	3	G. barbadense
GO:0031323	regulation of cellular metabolic process	1291	129	98.31	0.00057	0.02664	BP	3	G. barbadense
GO:0051171	regulation of nitrogen compound metaboli...	1291	129	98.31	0.00057	0.02664	BP	3	G. barbadense
GO:0080090	regulation of primary metabolic process	1291	129	98.31	0.00057	0.02664	BP	3	G. barbadense
GO:0044262	cellular carbohydrate metabolic process	250	34	19.04	0.00066	0.029304	BP	3	G. barbadense
GO:0003779	actin binding	38	12	2.5	3.4e-06	0.0021488	MF	4	G. barbadense
GO:0008092	cytoskeletal protein binding	41	12	2.7	8.2e-06	0.0025912	MF	4	G. barbadense
GO:0016881	acid-amino acid ligase activity	113	19	7.43	0.00014	0.0294933	MF	4	G. barbadense
GO:0016741	transferase activity, transferring one-c...	296	41	20.58	1.8e-05	0.011376	MF	5	G. barbadense
GO:0016829	lyase activity	219	32	15.23	5.1e-05	0.016116	MF	5	G. barbadense
GO:0019752	carboxylic acid metabolic process	466	73	33.97	2.5e-10	8.88e-08	BP	5	G. barbadense
GO:0043436	oxoacid metabolic process	466	73	33.97	2.5e-10	8.88e-08	BP	5	G. barbadense
GO:0006082	organic acid metabolic process	468	73	34.12	3e-10	8.88e-08	BP	5	G. barbadense
GO:0044281	small molecule metabolic process	729	99	53.15	5.8e-10	1.2876e-07	BP	5	G. barbadense
GO:0006520	cellular amino acid metabolic process	262	46	19.1	1.8e-08	3.1968e-06	BP	5	G. barbadense
GO:0044283	small molecule biosynthetic process	302	47	22.02	5.3e-07	7.77e-05	BP	5	G. barbadense
GO:0046394	carboxylic acid biosynthetic process	258	42	18.81	6.3e-07	7.77e-05	BP	5	G. barbadense
GO:0016053	organic acid biosynthetic process	259	42	18.88	7e-07	7.77e-05	BP	5	G. barbadense
GO:1901566	organonitrogen compound biosynthetic pro...	1056	114	76.99	8.4e-06	0.0008288	BP	5	G. barbadense
GO:0008652	cellular amino acid biosynthetic process	110	22	8.02	1.2e-05	0.0010656	BP	5	G. barbadense
GO:1901605	alpha-amino acid metabolic process	116	21	8.46	8.6e-05	0.00694255	BP	5	G. barbadense
GO:0009058	biosynthetic process	3114	273	227.03	0.00015	0.0102462	BP	5	G. barbadense
GO:0017144	drug metabolic process	222	32	16.19	0.00015	0.0102462	BP	5	G. barbadense
GO:0034660	ncRNA metabolic process	187	27	13.63	0.00048	0.0304457	BP	5	G. barbadense
GO:0022613	ribonucleoprotein complex biogenesis	49	11	3.57	0.00065	0.035964	BP	5	G. barbadense
GO:0042254	ribosome biogenesis	49	11	3.57	0.00065	0.035964	BP	5	G. barbadense
GO:0006418	tRNA aminoacylation for protein translat...	73	14	5.32	0.00069	0.035964	BP	5	G. barbadense
GO:0043038	amino acid activation	74	14	5.4	0.0008	0.035964	BP	5	G. barbadense
GO:0043039	tRNA aminoacylation	74	14	5.4	0.0008	0.035964	BP	5	G. barbadense
GO:1901576	organic substance biosynthetic process	2931	253	213.69	0.00081	0.035964	BP	5	G. barbadense
GO:1901293	nucleoside phosphate biosynthetic proces...	138	21	10.06	0.00099	0.0418629	BP	5	G. barbadense
GO:0097159	organic cyclic compound binding	6366	335	285.58	6.8e-05	0.027808	MF	6	G. barbadense
GO:1901363	heterocyclic compound binding	6363	334	285.45	8.8e-05	0.027808	MF	6	G. barbadense
GO:0005634	nucleus	883	56	31.77	5.3e-06	0.0012349	CC	6	G. barbadense
GO:0005811	lipid droplet	11	5	0.4	2.2e-05	0.00170867	CC	6	G. barbadense
GO:0012511	monolayer-surrounded lipid storage body	11	5	0.4	2.2e-05	0.00170867	CC	6	G. barbadense
GO:0043231	intracellular membrane-bounded organelle	1205	65	43.35	0.00016	0.00932	CC	6	G. barbadense
GO:0043227	membrane-bounded organelle	1226	65	44.11	0.00027	0.012582	CC	6	G. barbadense
GO:0044428	nuclear part	76	10	2.73	0.00034	0.0132033	CC	6	G. barbadense
GO:0031981	nuclear lumen	48	7	1.73	0.00147	0.04893	CC	6	G. barbadense
GO:0017111	nucleoside-triphosphatase activity	798	73	31.22	8.6e-12	5.4352e-09	MF	7	G. barbadense
GO:0016462	pyrophosphatase activity	819	73	32.04	2.9e-11	9.164e-09	MF	7	G. barbadense
GO:0016818	hydrolase activity, acting on acid anhyd...	838	73	32.79	8.5e-11	1.501e-08	MF	7	G. barbadense
GO:0016817	hydrolase activity, acting on acid anhyd...	840	73	32.87	9.5e-11	1.501e-08	MF	7	G. barbadense
GO:0003774	motor activity	120	23	4.7	2.1e-10	2.6544e-08	MF	7	G. barbadense
GO:0003777	microtubule motor activity	86	19	3.36	6.4e-10	6.74133e-08	MF	7	G. barbadense
GO:0008144	drug binding	2579	155	100.91	8.7e-09	7.85486e-07	MF	7	G. barbadense
GO:0036094	small molecule binding	3543	195	138.62	5.8e-08	4.582e-06	MF	7	G. barbadense
GO:0035639	purine ribonucleoside triphosphate bindi...	2793	159	109.28	2.1e-07	1.47467e-05	MF	7	G. barbadense
GO:0005524	ATP binding	2457	143	96.13	3e-07	1.78109e-05	MF	7	G. barbadense
GO:0043168	anion binding	3484	189	136.31	3.1e-07	1.78109e-05	MF	7	G. barbadense
GO:0140097	catalytic activity, acting on DNA	139	20	5.44	4.7e-07	2.47533e-05	MF	7	G. barbadense
GO:0000166	nucleotide binding	3380	182	132.24	9.7e-07	4.37886e-05	MF	7	G. barbadense
GO:1901265	nucleoside phosphate binding	3380	182	132.24	9.7e-07	4.37886e-05	MF	7	G. barbadense
GO:0032553	ribonucleotide binding	3072	168	120.19	1.2e-06	4.74e-05	MF	7	G. barbadense
GO:0032555	purine ribonucleotide binding	3051	167	119.37	1.2e-06	4.74e-05	MF	7	G. barbadense
GO:0016787	hydrolase activity	2543	144	99.5	1.3e-06	4.83294e-05	MF	7	G. barbadense
GO:0017076	purine nucleotide binding	3063	167	119.84	1.6e-06	5.32211e-05	MF	7	G. barbadense
GO:0097367	carbohydrate derivative binding	3088	168	120.82	1.6e-06	5.32211e-05	MF	7	G. barbadense
GO:0032559	adenyl ribonucleotide binding	2715	151	106.23	2e-06	6.32e-05	MF	7	G. barbadense
GO:0030554	adenyl nucleotide binding	2721	151	106.46	2.2e-06	6.62095e-05	MF	7	G. barbadense
GO:0003916	DNA topoisomerase activity	9	5	0.35	1e-05	0.000274783	MF	7	G. barbadense
GO:0043167	ion binding	5067	248	198.25	1e-05	0.000274783	MF	7	G. barbadense
GO:0004386	helicase activity	241	24	9.43	2.7e-05	0.000711	MF	7	G. barbadense
GO:0008094	DNA-dependent ATPase activity	17	6	0.67	3e-05	0.0007584	MF	7	G. barbadense
GO:0003824	catalytic activity	8517	376	333.23	0.00022	0.00534769	MF	7	G. barbadense
GO:0005488	binding	10185	438	398.5	0.00032	0.00749037	MF	7	G. barbadense
GO:0003678	DNA helicase activity	73	10	2.86	0.00053	0.0119629	MF	7	G. barbadense
GO:0003918	DNA topoisomerase type II (ATP-hydrolyzi...	6	3	0.23	0.00109	0.0229627	MF	7	G. barbadense
GO:0061505	DNA topoisomerase II activity	6	3	0.23	0.00109	0.0229627	MF	7	G. barbadense
GO:1901363	heterocyclic compound binding	6363	286	248.96	0.00115	0.0234452	MF	7	G. barbadense
GO:0097159	organic cyclic compound binding	6366	286	249.07	0.00119	0.0235025	MF	7	G. barbadense
GO:0030170	pyridoxal phosphate binding	111	12	4.34	0.00133	0.0247224	MF	7	G. barbadense
GO:0070279	vitamin B6 binding	111	12	4.34	0.00133	0.0247224	MF	7	G. barbadense
GO:0019842	vitamin binding	129	13	5.05	0.00163	0.0294331	MF	7	G. barbadense
GO:0004345	glucose-6-phosphate dehydrogenase activi...	7	3	0.27	0.00185	0.0324541	MF	7	G. barbadense
GO:0016887	ATPase activity	396	28	15.49	0.0019	0.0324541	MF	7	G. barbadense
GO:0042623	ATPase activity, coupled	252	20	9.86	0.00221	0.03634	MF	7	G. barbadense
GO:0008026	ATP-dependent helicase activity	134	13	5.24	0.0023	0.03634	MF	7	G. barbadense
GO:0070035	purine NTP-dependent helicase activity	134	13	5.24	0.0023	0.03634	MF	7	G. barbadense
GO:0004518	nuclease activity	105	11	4.11	0.00268	0.0413112	MF	7	G. barbadense
GO:0006259	DNA metabolic process	270	36	10.06	2.3e-11	2.0424e-08	BP	7	G. barbadense
GO:0006928	movement of cell or subcellular componen...	86	19	3.2	2.6e-10	7.696e-08	BP	7	G. barbadense
GO:0007018	microtubule-based movement	86	19	3.2	2.6e-10	7.696e-08	BP	7	G. barbadense
GO:0007017	microtubule-based process	108	21	4.02	3.7e-10	8.214e-08	BP	7	G. barbadense
GO:0006265	DNA topological change	9	5	0.34	7.8e-06	0.00109097	BP	7	G. barbadense
GO:0006974	cellular response to DNA damage stimulus	176	20	6.55	8.6e-06	0.00109097	BP	7	G. barbadense
GO:0033554	cellular response to stress	176	20	6.55	8.6e-06	0.00109097	BP	7	G. barbadense
GO:0006260	DNA replication	65	11	2.42	2.4e-05	0.002664	BP	7	G. barbadense
GO:0006281	DNA repair	175	19	6.52	2.8e-05	0.00276267	BP	7	G. barbadense
GO:0071840	cellular component organization or bioge...	364	28	13.56	0.00022	0.019536	BP	7	G. barbadense
GO:0022613	ribonucleoprotein complex biogenesis	49	8	1.82	0.00041	0.0300554	BP	7	G. barbadense
GO:0042254	ribosome biogenesis	49	8	1.82	0.00041	0.0300554	BP	7	G. barbadense
GO:0051276	chromosome organization	75	10	2.79	0.00044	0.0300554	BP	7	G. barbadense
GO:0006364	rRNA processing	29	6	1.08	0.00059	0.034928	BP	7	G. barbadense
GO:0016072	rRNA metabolic process	29	6	1.08	0.00059	0.034928	BP	7	G. barbadense
GO:0043565	sequence-specific DNA binding	482	41	15.23	8.5e-09	5.372e-06	MF	9	G. barbadense
GO:0003700	DNA-binding transcription factor activit...	717	50	22.66	1.3e-07	4.108e-05	MF	9	G. barbadense
GO:0140110	transcription regulator activity	733	50	23.17	2.5e-07	5.26667e-05	MF	9	G. barbadense
GO:0003677	DNA binding	1728	87	54.62	6.7e-06	0.0010586	MF	9	G. barbadense
GO:0019219	regulation of nucleobase-containing comp...	1257	73	40.75	4.1e-07	7.4e-05	BP	9	G. barbadense
GO:0051171	regulation of nitrogen compound metaboli...	1291	74	41.86	5.6e-07	7.4e-05	BP	9	G. barbadense
GO:0080090	regulation of primary metabolic process	1291	74	41.86	5.6e-07	7.4e-05	BP	9	G. barbadense
GO:0060255	regulation of macromolecule metabolic pr...	1295	74	41.99	6.3e-07	7.4e-05	BP	9	G. barbadense
GO:0019222	regulation of metabolic process	1297	74	42.05	6.7e-07	7.4e-05	BP	9	G. barbadense
GO:0006355	regulation of transcription, DNA-templat...	1253	72	40.62	7.5e-07	7.4e-05	BP	9	G. barbadense
GO:0051252	regulation of RNA metabolic process	1253	72	40.62	7.5e-07	7.4e-05	BP	9	G. barbadense
GO:1903506	regulation of nucleic acid-templated tra...	1253	72	40.62	7.5e-07	7.4e-05	BP	9	G. barbadense
GO:2001141	regulation of RNA biosynthetic process	1253	72	40.62	7.5e-07	7.4e-05	BP	9	G. barbadense
GO:0031323	regulation of cellular metabolic process	1291	73	41.86	1.1e-06	8.24571e-05	BP	9	G. barbadense
GO:0009889	regulation of biosynthetic process	1272	72	41.24	1.3e-06	8.24571e-05	BP	9	G. barbadense
GO:0010556	regulation of macromolecule biosynthetic...	1272	72	41.24	1.3e-06	8.24571e-05	BP	9	G. barbadense
GO:0031326	regulation of cellular biosynthetic proc...	1272	72	41.24	1.3e-06	8.24571e-05	BP	9	G. barbadense
GO:2000112	regulation of cellular macromolecule bio...	1272	72	41.24	1.3e-06	8.24571e-05	BP	9	G. barbadense
GO:0010468	regulation of gene expression	1273	72	41.27	1.4e-06	8.288e-05	BP	9	G. barbadense
GO:0050789	regulation of biological process	1840	93	59.66	4.1e-06	0.00022755	BP	9	G. barbadense
GO:0050794	regulation of cellular process	1818	92	58.94	4.4e-06	0.000229835	BP	9	G. barbadense
GO:0006351	transcription, DNA-templated	1415	75	45.88	8.8e-06	0.000411284	BP	9	G. barbadense
GO:0097659	nucleic acid-templated transcription	1415	75	45.88	8.8e-06	0.000411284	BP	9	G. barbadense
GO:0032774	RNA biosynthetic process	1417	75	45.94	9.3e-06	0.00041292	BP	9	G. barbadense
GO:0065007	biological regulation	1947	94	63.13	2.4e-05	0.00101486	BP	9	G. barbadense
GO:0034654	nucleobase-containing compound biosynthe...	1558	77	50.51	7.6e-05	0.00306764	BP	9	G. barbadense
GO:0018130	heterocycle biosynthetic process	1657	80	53.72	0.00012	0.00463304	BP	9	G. barbadense
GO:0019438	aromatic compound biosynthetic process	1650	79	53.5	0.00017	0.00629	BP	9	G. barbadense
GO:1901362	organic cyclic compound biosynthetic pro...	1778	83	57.65	0.00027	0.0095904	BP	9	G. barbadense
GO:0016070	RNA metabolic process	1719	80	55.73	0.00039	0.01332	BP	9	G. barbadense
GO:0003735	structural constituent of ribosome	481	59	10.85	4.8e-27	3.0336e-24	MF	10	G. barbadense
GO:0005198	structural molecule activity	548	60	12.36	7.6e-25	2.4016e-22	MF	10	G. barbadense
GO:1901566	organonitrogen compound biosynthetic pro...	1056	83	24.15	4e-25	3.552e-22	BP	10	G. barbadense
GO:0006412	translation	635	63	14.52	4.5e-24	1.8648e-21	BP	10	G. barbadense
GO:0043043	peptide biosynthetic process	639	63	14.61	6.3e-24	1.8648e-21	BP	10	G. barbadense
GO:0006518	peptide metabolic process	647	63	14.8	1.2e-23	2.664e-21	BP	10	G. barbadense
GO:0043604	amide biosynthetic process	662	63	15.14	4.3e-23	7.6368e-21	BP	10	G. barbadense
GO:0043603	cellular amide metabolic process	679	63	15.53	1.7e-22	2.516e-20	BP	10	G. barbadense
GO:0044271	cellular nitrogen compound biosynthetic ...	2289	107	52.35	4.2e-15	5.328e-13	BP	10	G. barbadense
GO:0044249	cellular biosynthetic process	2836	117	64.86	9.6e-13	1.0656e-10	BP	10	G. barbadense
GO:1901576	organic substance biosynthetic process	2931	119	67.03	1.6e-12	1.57867e-10	BP	10	G. barbadense
GO:0009058	biosynthetic process	3114	120	71.22	5.1e-11	4.5288e-09	BP	10	G. barbadense
GO:0034641	cellular nitrogen compound metabolic pro...	2926	113	66.92	2.8e-10	2.26036e-08	BP	10	G. barbadense
GO:0010467	gene expression	2253	94	51.53	4.2e-10	3.108e-08	BP	10	G. barbadense
GO:0034645	cellular macromolecule biosynthetic proc...	2333	96	53.36	5.3e-10	3.61543e-08	BP	10	G. barbadense
GO:0009059	macromolecule biosynthetic process	2336	96	53.43	5.7e-10	3.61543e-08	BP	10	G. barbadense
GO:0009987	cellular process	6807	192	155.68	1.4e-06	8.288e-05	BP	10	G. barbadense
GO:0044267	cellular protein metabolic process	2550	90	58.32	3.9e-06	0.00021645	BP	10	G. barbadense
GO:0009142	nucleoside triphosphate biosynthetic pro...	99	11	2.26	1.5e-05	0.000666	BP	10	G. barbadense
GO:0009145	purine nucleoside triphosphate biosynthe...	99	11	2.26	1.5e-05	0.000666	BP	10	G. barbadense
GO:0009201	ribonucleoside triphosphate biosynthetic...	99	11	2.26	1.5e-05	0.000666	BP	10	G. barbadense
GO:0009206	purine ribonucleoside triphosphate biosy...	99	11	2.26	1.5e-05	0.000666	BP	10	G. barbadense
GO:1901564	organonitrogen compound metabolic proces...	3556	113	81.33	2e-05	0.000845714	BP	10	G. barbadense
GO:0009152	purine ribonucleotide biosynthetic proce...	110	11	2.52	4.2e-05	0.00169527	BP	10	G. barbadense
GO:0006754	ATP biosynthetic process	93	10	2.13	5e-05	0.00191808	BP	10	G. barbadense
GO:0009260	ribonucleotide biosynthetic process	113	11	2.58	5.4e-05	0.00191808	BP	10	G. barbadense
GO:0046390	ribose phosphate biosynthetic process	113	11	2.58	5.4e-05	0.00191808	BP	10	G. barbadense
GO:0006164	purine nucleotide biosynthetic process	114	11	2.61	5.8e-05	0.00198092	BP	10	G. barbadense
GO:0072522	purine-containing compound biosynthetic ...	116	11	2.65	6.8e-05	0.00223644	BP	10	G. barbadense
GO:0009127	purine nucleoside monophosphate biosynth...	102	10	2.33	0.00011	0.00336828	BP	10	G. barbadense
GO:0009168	purine ribonucleoside monophosphate bios...	102	10	2.33	0.00011	0.00336828	BP	10	G. barbadense
GO:0009156	ribonucleoside monophosphate biosyntheti...	105	10	2.4	0.00014	0.004144	BP	10	G. barbadense
GO:0009124	nucleoside monophosphate biosynthetic pr...	108	10	2.47	0.00018	0.00515613	BP	10	G. barbadense
GO:0015985	energy coupled proton transport, down el...	39	6	0.89	0.00023	0.00618909	BP	10	G. barbadense
GO:0015986	ATP synthesis coupled proton transport	39	6	0.89	0.00023	0.00618909	BP	10	G. barbadense
GO:0009165	nucleotide biosynthetic process	134	11	3.06	0.00025	0.00634286	BP	10	G. barbadense
GO:0019538	protein metabolic process	2988	94	68.34	0.00025	0.00634286	BP	10	G. barbadense
GO:0044237	cellular metabolic process	5724	159	130.91	0.00026	0.00637538	BP	10	G. barbadense
GO:0009144	purine nucleoside triphosphate metabolic...	136	11	3.11	0.00028	0.00637538	BP	10	G. barbadense
GO:0009199	ribonucleoside triphosphate metabolic pr...	136	11	3.11	0.00028	0.00637538	BP	10	G. barbadense
GO:0009205	purine ribonucleoside triphosphate metab...	136	11	3.11	0.00028	0.00637538	BP	10	G. barbadense
GO:0009141	nucleoside triphosphate metabolic proces...	137	11	3.13	0.0003	0.00666	BP	10	G. barbadense
GO:1901293	nucleoside phosphate biosynthetic proces...	138	11	3.16	0.00032	0.00693073	BP	10	G. barbadense
GO:0090407	organophosphate biosynthetic process	191	13	4.37	0.00044	0.00930286	BP	10	G. barbadense
GO:0046034	ATP metabolic process	127	10	2.9	0.00066	0.0136298	BP	10	G. barbadense
GO:0044260	cellular macromolecule metabolic process	4378	125	100.13	0.00095	0.0191727	BP	10	G. barbadense
GO:0009126	purine nucleoside monophosphate metaboli...	136	10	3.11	0.00112	0.0216209	BP	10	G. barbadense
GO:0009167	purine ribonucleoside monophosphate meta...	136	10	3.11	0.00112	0.0216209	BP	10	G. barbadense
GO:0009150	purine ribonucleotide metabolic process	162	11	3.71	0.00123	0.0232391	BP	10	G. barbadense
GO:0009161	ribonucleoside monophosphate metabolic p...	139	10	3.18	0.00132	0.02442	BP	10	G. barbadense
GO:0009259	ribonucleotide metabolic process	165	11	3.77	0.00143	0.0259151	BP	10	G. barbadense
GO:1901137	carbohydrate derivative biosynthetic pro...	244	14	5.58	0.00146	0.0259296	BP	10	G. barbadense
GO:0006163	purine nucleotide metabolic process	166	11	3.8	0.0015	0.0261176	BP	10	G. barbadense
GO:0009123	nucleoside monophosphate metabolic proce...	142	10	3.25	0.00155	0.0264692	BP	10	G. barbadense
GO:0072521	purine-containing compound metabolic pro...	168	11	3.84	0.00165	0.0276453	BP	10	G. barbadense
GO:0006807	nitrogen compound metabolic process	5431	147	124.21	0.0026	0.0427556	BP	10	G. barbadense
GO:0005840	ribosome	481	59	15.49	2.5e-21	5.825e-19	CC	10	G. barbadense
GO:1990904	ribonucleoprotein complex	507	59	16.33	3.8e-20	4.427e-18	CC	10	G. barbadense
GO:0043228	non-membrane-bounded organelle	643	63	20.7	1.1e-17	6.4075e-16	CC	10	G. barbadense
GO:0043232	intracellular non-membrane-bounded organ...	643	63	20.7	1.1e-17	6.4075e-16	CC	10	G. barbadense
GO:0044444	cytoplasmic part	931	74	29.98	6.6e-16	3.0756e-14	CC	10	G. barbadense
GO:0005737	cytoplasm	1287	84	41.44	3.2e-13	1.24267e-11	CC	10	G. barbadense
GO:0032991	protein-containing complex	1267	83	40.8	4.2e-13	1.398e-11	CC	10	G. barbadense
GO:0043226	organelle	1818	101	58.54	5.1e-12	1.32033e-10	CC	10	G. barbadense
GO:0043229	intracellular organelle	1818	101	58.54	5.1e-12	1.32033e-10	CC	10	G. barbadense
GO:0044424	intracellular part	2481	118	79.89	5.1e-10	1.1883e-08	CC	10	G. barbadense
GO:0005623	cell	3058	132	98.47	7.1e-09	1.37858e-07	CC	10	G. barbadense
GO:0044464	cell part	3058	132	98.47	7.1e-09	1.37858e-07	CC	10	G. barbadense
GO:0005622	intracellular	2903	127	93.48	1.5e-08	2.68846e-07	CC	10	G. barbadense
GO:0005753	mitochondrial proton-transporting ATP sy...	15	5	0.48	7.5e-05	0.00124821	CC	10	G. barbadense
GO:0098800	inner mitochondrial membrane protein com...	19	5	0.61	0.00026	0.00403867	CC	10	G. barbadense
GO:0098798	mitochondrial protein complex	32	6	1.03	0.00046	0.00669875	CC	10	G. barbadense
GO:0044429	mitochondrial part	80	9	2.58	0.00097	0.0132947	CC	10	G. barbadense
GO:0045259	proton-transporting ATP synthase complex	38	6	1.22	0.00119	0.0154039	CC	10	G. barbadense
GO:0005740	mitochondrial envelope	72	8	2.32	0.00202	0.0235913	CC	10	G. barbadense
GO:0005743	mitochondrial inner membrane	29	5	0.93	0.00206	0.0235913	CC	10	G. barbadense
GO:0015934	large ribosomal subunit	9	3	0.29	0.00239	0.0235913	CC	10	G. barbadense
GO:0044391	ribosomal subunit	9	3	0.29	0.00239	0.0235913	CC	10	G. barbadense
GO:0044455	mitochondrial membrane part	30	5	0.97	0.00241	0.0235913	CC	10	G. barbadense
GO:0005739	mitochondrion	91	9	2.93	0.00243	0.0235913	CC	10	G. barbadense
GO:0019866	organelle inner membrane	31	5	1	0.0028	0.026096	CC	10	G. barbadense
GO:0031975	envelope	99	9	3.19	0.00431	0.0385744	CC	10	G. barbadense
GO:0000276	mitochondrial proton-transporting ATP sy...	11	3	0.35	0.00447	0.0385744	CC	10	G. barbadense
GO:0031967	organelle envelope	84	8	2.7	0.0053	0.0441036	CC	10	G. barbadense
GO:0031966	mitochondrial membrane	52	6	1.67	0.00607	0.0487693	CC	10	G. barbadense
GO:0050794	regulation of cellular process	1818	51	32.02	0.00035	0.0368862	BP	11	G. barbadense
GO:0009889	regulation of biosynthetic process	1272	39	22.4	0.00037	0.0368862	BP	11	G. barbadense
GO:0010556	regulation of macromolecule biosynthetic...	1272	39	22.4	0.00037	0.0368862	BP	11	G. barbadense
GO:0031326	regulation of cellular biosynthetic proc...	1272	39	22.4	0.00037	0.0368862	BP	11	G. barbadense
GO:2000112	regulation of cellular macromolecule bio...	1272	39	22.4	0.00037	0.0368862	BP	11	G. barbadense
GO:0010468	regulation of gene expression	1273	39	22.42	0.00037	0.0368862	BP	11	G. barbadense
GO:0050789	regulation of biological process	1840	51	32.41	0.00046	0.0368862	BP	11	G. barbadense
GO:0031323	regulation of cellular metabolic process	1291	39	22.74	0.0005	0.0368862	BP	11	G. barbadense
GO:0051171	regulation of nitrogen compound metaboli...	1291	39	22.74	0.0005	0.0368862	BP	11	G. barbadense
GO:0080090	regulation of primary metabolic process	1291	39	22.74	0.0005	0.0368862	BP	11	G. barbadense
GO:0060255	regulation of macromolecule metabolic pr...	1295	39	22.81	0.00053	0.0368862	BP	11	G. barbadense
GO:0065007	biological regulation	1947	53	34.29	0.00054	0.0368862	BP	11	G. barbadense
GO:0019222	regulation of metabolic process	1297	39	22.84	0.00054	0.0368862	BP	11	G. barbadense
GO:0016668	oxidoreductase activity, acting on a sul...	84	9	1.57	2.7e-05	0.008532	MF	12	G. barbadense
GO:0047134	protein-disulfide reductase activity	84	9	1.57	2.7e-05	0.008532	MF	12	G. barbadense
GO:0016168	chlorophyll binding	12	4	0.22	5.3e-05	0.009796	MF	12	G. barbadense
GO:0015036	disulfide oxidoreductase activity	139	11	2.6	6.2e-05	0.009796	MF	12	G. barbadense
GO:0016651	oxidoreductase activity, acting on NAD(P...	147	11	2.75	0.0001	0.01264	MF	12	G. barbadense
GO:0016667	oxidoreductase activity, acting on a sul...	155	11	2.9	0.00016	0.0168533	MF	12	G. barbadense
GO:0004866	endopeptidase inhibitor activity	20	4	0.37	0.00046	0.029072	MF	12	G. barbadense
GO:0030414	peptidase inhibitor activity	20	4	0.37	0.00046	0.029072	MF	12	G. barbadense
GO:0061134	peptidase regulator activity	20	4	0.37	0.00046	0.029072	MF	12	G. barbadense
GO:0061135	endopeptidase regulator activity	20	4	0.37	0.00046	0.029072	MF	12	G. barbadense
GO:0043531	ADP binding	272	14	5.1	0.00064	0.0367709	MF	12	G. barbadense
GO:0009521	photosystem	99	9	1.61	2.7e-05	0.0031688	CC	12	G. barbadense
GO:0034357	photosynthetic membrane	105	9	1.71	4.4e-05	0.0031688	CC	12	G. barbadense
GO:0098796	membrane protein complex	327	16	5.33	5.7e-05	0.0031688	CC	12	G. barbadense
GO:0009579	thylakoid	111	9	1.81	6.8e-05	0.0031688	CC	12	G. barbadense
GO:0044436	thylakoid part	111	9	1.81	6.8e-05	0.0031688	CC	12	G. barbadense
GO:0005375	copper ion transmembrane transporter act...	11	4	0.22	4.6e-05	0.029072	MF	14	G. barbadense
GO:0035434	copper ion transmembrane transport	11	4	0.24	6.5e-05	0.04144	BP	14	G. barbadense
GO:0006952	defense response	52	7	1.13	0.00013	0.04144	BP	14	G. barbadense
GO:0006825	copper ion transport	13	4	0.28	0.00014	0.04144	BP	14	G. barbadense
GO:0051704	multi-organism process	73	8	1.22	2.8e-05	0.009916	BP	15	G. barbadense
GO:0008037	cell recognition	61	7	1.02	6.7e-05	0.009916	BP	15	G. barbadense
GO:0009856	pollination	61	7	1.02	6.7e-05	0.009916	BP	15	G. barbadense
GO:0009875	pollen-pistil interaction	61	7	1.02	6.7e-05	0.009916	BP	15	G. barbadense
GO:0044706	multi-multicellular organism process	61	7	1.02	6.7e-05	0.009916	BP	15	G. barbadense
GO:0048544	recognition of pollen	61	7	1.02	6.7e-05	0.009916	BP	15	G. barbadense
GO:0000003	reproduction	64	7	1.07	9.1e-05	0.010101	BP	15	G. barbadense
GO:0022414	reproductive process	64	7	1.07	9.1e-05	0.010101	BP	15	G. barbadense
GO:0032501	multicellular organismal process	83	7	1.39	0.00047	0.0463733	BP	15	G. barbadense
GO:0003954	NADH dehydrogenase activity	32	16	0.55	1.6e-20	3.37067e-18	MF	16	G. barbadense
GO:0008137	NADH dehydrogenase (ubiquinone) activity	32	16	0.55	1.6e-20	3.37067e-18	MF	16	G. barbadense
GO:0050136	NADH dehydrogenase (quinone) activity	32	16	0.55	1.6e-20	3.37067e-18	MF	16	G. barbadense
GO:0016655	oxidoreductase activity, acting on NAD(P...	36	16	0.61	1.8e-19	2.844e-17	MF	16	G. barbadense
GO:0016651	oxidoreductase activity, acting on NAD(P...	147	19	2.51	7.2e-12	9.1008e-10	MF	16	G. barbadense
GO:0015078	proton transmembrane transporter activit...	152	19	2.6	1.3e-11	1.36933e-09	MF	16	G. barbadense
GO:0016984	ribulose-bisphosphate carboxylase activi...	6	6	0.1	2.3e-11	2.07657e-09	MF	16	G. barbadense
GO:0015077	monovalent inorganic cation transmembran...	198	19	3.38	1.3e-09	1.027e-07	MF	16	G. barbadense
GO:0003735	structural constituent of ribosome	481	29	8.21	3.9e-09	2.73867e-07	MF	16	G. barbadense
GO:0022890	inorganic cation transmembrane transport...	269	21	4.59	7.4e-09	4.6768e-07	MF	16	G. barbadense
GO:0008324	cation transmembrane transporter activit...	284	21	4.85	1.9e-08	1.09164e-06	MF	16	G. barbadense
GO:0045156	electron transporter, transferring elect...	13	6	0.22	3.6e-08	1.896e-06	MF	16	G. barbadense
GO:0005198	structural molecule activity	548	29	9.36	6.8e-08	3.30585e-06	MF	16	G. barbadense
GO:0003899	DNA-directed 5'-3' RNA polymerase activi...	88	11	1.5	2.9e-07	1.30914e-05	MF	16	G. barbadense
GO:0015318	inorganic molecular entity transmembrane...	346	21	5.91	5.4e-07	2.2752e-05	MF	16	G. barbadense
GO:0034062	5'-3' RNA polymerase activity	96	11	1.64	7.2e-07	2.67671e-05	MF	16	G. barbadense
GO:0097747	RNA polymerase activity	96	11	1.64	7.2e-07	2.67671e-05	MF	16	G. barbadense
GO:0015075	ion transmembrane transporter activity	364	21	6.22	1.2e-06	4.21333e-05	MF	16	G. barbadense
GO:0015002	heme-copper terminal oxidase activity	20	5	0.34	1.8e-05	0.000598737	MF	16	G. barbadense
GO:0048038	quinone binding	23	5	0.39	3.7e-05	0.00111352	MF	16	G. barbadense
GO:0016168	chlorophyll binding	12	4	0.2	3.7e-05	0.00111352	MF	16	G. barbadense
GO:0016831	carboxy-lyase activity	45	6	0.77	0.00011	0.00316	MF	16	G. barbadense
GO:0016779	nucleotidyltransferase activity	193	12	3.3	0.00012	0.00329739	MF	16	G. barbadense
GO:0022857	transmembrane transporter activity	604	23	10.31	0.00029	0.007584	MF	16	G. barbadense
GO:0046933	proton-transporting ATP synthase activit...	35	5	0.6	0.0003	0.007584	MF	16	G. barbadense
GO:0036442	proton-exporting ATPase activity	42	5	0.72	0.00071	0.0164771	MF	16	G. barbadense
GO:0046961	proton-transporting ATPase activity, rot...	42	5	0.72	0.00071	0.0164771	MF	16	G. barbadense
GO:0051539	4 iron, 4 sulfur cluster binding	11	3	0.19	0.00073	0.0164771	MF	16	G. barbadense
GO:0016491	oxidoreductase activity	1879	50	32.09	0.00091	0.0187685	MF	16	G. barbadense
GO:0019829	cation-transporting ATPase activity	45	5	0.77	0.00098	0.0187685	MF	16	G. barbadense
GO:0022853	active ion transmembrane transporter act...	45	5	0.77	0.00098	0.0187685	MF	16	G. barbadense
GO:0042625	ATPase coupled ion transmembrane transpo...	45	5	0.77	0.00098	0.0187685	MF	16	G. barbadense
GO:0044769	ATPase activity, coupled to transmembran...	45	5	0.77	0.00098	0.0187685	MF	16	G. barbadense
GO:0140098	catalytic activity, acting on RNA	278	13	4.75	0.00102	0.01896	MF	16	G. barbadense
GO:0016830	carbon-carbon lyase activity	77	6	1.31	0.00202	0.0364754	MF	16	G. barbadense
GO:0022900	electron transport chain	56	25	1.12	2.8e-28	2.4836e-25	BP	16	G. barbadense
GO:0006091	generation of precursor metabolites and ...	124	30	2.48	1.5e-24	6.6525e-22	BP	16	G. barbadense
GO:0045333	cellular respiration	37	16	0.74	3.4e-18	1.00527e-15	BP	16	G. barbadense
GO:0015980	energy derivation by oxidation of organi...	40	16	0.8	1.6e-17	3.548e-15	BP	16	G. barbadense
GO:0022904	respiratory electron transport chain	28	14	0.56	3.4e-17	5.7655e-15	BP	16	G. barbadense
GO:0046034	ATP metabolic process	127	24	2.54	3.9e-17	5.7655e-15	BP	16	G. barbadense
GO:0009126	purine nucleoside monophosphate metaboli...	136	24	2.72	2e-16	1.61273e-14	BP	16	G. barbadense
GO:0009144	purine nucleoside triphosphate metabolic...	136	24	2.72	2e-16	1.61273e-14	BP	16	G. barbadense
GO:0009167	purine ribonucleoside monophosphate meta...	136	24	2.72	2e-16	1.61273e-14	BP	16	G. barbadense
GO:0009199	ribonucleoside triphosphate metabolic pr...	136	24	2.72	2e-16	1.61273e-14	BP	16	G. barbadense
GO:0009205	purine ribonucleoside triphosphate metab...	136	24	2.72	2e-16	1.61273e-14	BP	16	G. barbadense
GO:0009141	nucleoside triphosphate metabolic proces...	137	24	2.74	2.4e-16	1.774e-14	BP	16	G. barbadense
GO:0009161	ribonucleoside monophosphate metabolic p...	139	24	2.78	3.4e-16	2.31985e-14	BP	16	G. barbadense
GO:0009123	nucleoside monophosphate metabolic proce...	142	24	2.84	5.7e-16	3.61136e-14	BP	16	G. barbadense
GO:0019684	photosynthesis, light reaction	29	13	0.58	2.9e-15	1.71487e-13	BP	16	G. barbadense
GO:0009150	purine ribonucleotide metabolic process	162	24	3.24	1.2e-14	6.6525e-13	BP	16	G. barbadense
GO:0009259	ribonucleotide metabolic process	165	24	3.3	1.9e-14	9.91353e-13	BP	16	G. barbadense
GO:0006163	purine nucleotide metabolic process	166	24	3.32	2.2e-14	1.08411e-12	BP	16	G. barbadense
GO:0072521	purine-containing compound metabolic pro...	168	24	3.36	2.9e-14	1.35384e-12	BP	16	G. barbadense
GO:0006119	oxidative phosphorylation	22	11	0.44	9.3e-14	3.92814e-12	BP	16	G. barbadense
GO:0042773	ATP synthesis coupled electron transport	22	11	0.44	9.3e-14	3.92814e-12	BP	16	G. barbadense
GO:1902600	proton transmembrane transport	93	18	1.86	2.5e-13	1.00795e-11	BP	16	G. barbadense
GO:0019693	ribose phosphate metabolic process	190	24	3.8	4.6e-13	1.774e-11	BP	16	G. barbadense
GO:0006753	nucleoside phosphate metabolic process	219	25	4.38	1.5e-12	5.54375e-11	BP	16	G. barbadense
GO:0009117	nucleotide metabolic process	212	24	4.24	5.1e-12	1.80948e-10	BP	16	G. barbadense
GO:0017144	drug metabolic process	222	24	4.44	1.4e-11	4.77615e-10	BP	16	G. barbadense
GO:0009767	photosynthetic electron transport chain	25	10	0.5	2.1e-11	6.89889e-10	BP	16	G. barbadense
GO:0055086	nucleobase-containing small molecule met...	248	25	4.95	2.4e-11	7.60286e-10	BP	16	G. barbadense
GO:0034220	ion transmembrane transport	136	18	2.72	2e-10	5.54375e-09	BP	16	G. barbadense
GO:0098655	cation transmembrane transport	136	18	2.72	2e-10	5.54375e-09	BP	16	G. barbadense
GO:0098660	inorganic ion transmembrane transport	136	18	2.72	2e-10	5.54375e-09	BP	16	G. barbadense
GO:0098662	inorganic cation transmembrane transport	136	18	2.72	2e-10	5.54375e-09	BP	16	G. barbadense
GO:0019637	organophosphate metabolic process	327	27	6.53	3.6e-10	9.67636e-09	BP	16	G. barbadense
GO:0044237	cellular metabolic process	5724	159	114.36	1.1e-09	2.86971e-08	BP	16	G. barbadense
GO:0015672	monovalent inorganic cation transport	154	18	3.08	1.6e-09	4.05486e-08	BP	16	G. barbadense
GO:0015985	energy coupled proton transport, down el...	39	10	0.78	3.2e-09	7.67135e-08	BP	16	G. barbadense
GO:0015986	ATP synthesis coupled proton transport	39	10	0.78	3.2e-09	7.67135e-08	BP	16	G. barbadense
GO:1901135	carbohydrate derivative metabolic proces...	379	27	7.57	9e-09	2.10079e-07	BP	16	G. barbadense
GO:0015977	carbon fixation	11	6	0.22	2.5e-08	5.6859e-07	BP	16	G. barbadense
GO:0009772	photosynthetic electron transport in pho...	13	6	0.26	9.1e-08	2.01792e-06	BP	16	G. barbadense
GO:0009987	cellular process	6807	171	136	6.5e-07	1.40622e-05	BP	16	G. barbadense
GO:0015988	energy coupled proton transmembrane tran...	55	9	1.1	1.2e-06	2.31391e-05	BP	16	G. barbadense
GO:0015991	ATP hydrolysis coupled proton transport	55	9	1.1	1.2e-06	2.31391e-05	BP	16	G. barbadense
GO:0090662	ATP hydrolysis coupled transmembrane tra...	55	9	1.1	1.2e-06	2.31391e-05	BP	16	G. barbadense
GO:0099131	ATP hydrolysis coupled ion transmembrane...	55	9	1.1	1.2e-06	2.31391e-05	BP	16	G. barbadense
GO:0099132	ATP hydrolysis coupled cation transmembr...	55	9	1.1	1.2e-06	2.31391e-05	BP	16	G. barbadense
GO:0008535	respiratory chain complex IV assembly	6	4	0.12	2.3e-06	4.34064e-05	BP	16	G. barbadense
GO:0017004	cytochrome complex assembly	8	4	0.16	1e-05	0.000184792	BP	16	G. barbadense
GO:0006754	ATP biosynthetic process	93	10	1.86	1.6e-05	0.000289633	BP	16	G. barbadense
GO:0006812	cation transport	349	20	6.97	2.3e-05	0.00040802	BP	16	G. barbadense
GO:0006412	translation	635	29	12.69	2.6e-05	0.000435436	BP	16	G. barbadense
GO:0009142	nucleoside triphosphate biosynthetic pro...	99	10	1.98	2.7e-05	0.000435436	BP	16	G. barbadense
GO:0009145	purine nucleoside triphosphate biosynthe...	99	10	1.98	2.7e-05	0.000435436	BP	16	G. barbadense
GO:0009201	ribonucleoside triphosphate biosynthetic...	99	10	1.98	2.7e-05	0.000435436	BP	16	G. barbadense
GO:0009206	purine ribonucleoside triphosphate biosy...	99	10	1.98	2.7e-05	0.000435436	BP	16	G. barbadense
GO:0043043	peptide biosynthetic process	639	29	12.77	2.9e-05	0.000459339	BP	16	G. barbadense
GO:0009127	purine nucleoside monophosphate biosynth...	102	10	2.04	3.6e-05	0.00054122	BP	16	G. barbadense
GO:0009168	purine ribonucleoside monophosphate bios...	102	10	2.04	3.6e-05	0.00054122	BP	16	G. barbadense
GO:0006518	peptide metabolic process	647	29	12.93	3.6e-05	0.00054122	BP	16	G. barbadense
GO:0008152	metabolic process	8883	201	177.47	3.9e-05	0.00057655	BP	16	G. barbadense
GO:0009156	ribonucleoside monophosphate biosyntheti...	105	10	2.1	4.6e-05	0.000668885	BP	16	G. barbadense
GO:1901566	organonitrogen compound biosynthetic pro...	1056	40	21.1	5.4e-05	0.000772548	BP	16	G. barbadense
GO:0043604	amide biosynthetic process	662	29	13.23	5.5e-05	0.000774365	BP	16	G. barbadense
GO:0009124	nucleoside monophosphate biosynthetic pr...	108	10	2.16	5.8e-05	0.000803844	BP	16	G. barbadense
GO:0034641	cellular nitrogen compound metabolic pro...	2926	85	58.46	6e-05	0.000818769	BP	16	G. barbadense
GO:0009152	purine ribonucleotide biosynthetic proce...	110	10	2.2	6.8e-05	0.000913879	BP	16	G. barbadense
GO:0043603	cellular amide metabolic process	679	29	13.57	8.6e-05	0.00110554	BP	16	G. barbadense
GO:0009260	ribonucleotide biosynthetic process	113	10	2.26	8.6e-05	0.00110554	BP	16	G. barbadense
GO:0046390	ribose phosphate biosynthetic process	113	10	2.26	8.6e-05	0.00110554	BP	16	G. barbadense
GO:0006164	purine nucleotide biosynthetic process	114	10	2.28	9.2e-05	0.00116577	BP	16	G. barbadense
GO:0072522	purine-containing compound biosynthetic ...	116	10	2.32	0.00011	0.00137423	BP	16	G. barbadense
GO:0006811	ion transport	419	20	8.37	0.00028	0.00344944	BP	16	G. barbadense
GO:0009165	nucleotide biosynthetic process	134	10	2.68	0.00035	0.00425274	BP	16	G. barbadense
GO:1901293	nucleoside phosphate biosynthetic proces...	138	10	2.76	0.00044	0.00527405	BP	16	G. barbadense
GO:0044281	small molecule metabolic process	729	28	14.56	0.00065	0.00768733	BP	16	G. barbadense
GO:0006397	mRNA processing	29	4	0.58	0.00249	0.0290609	BP	16	G. barbadense
GO:0055114	oxidation-reduction process	1613	48	32.23	0.00259	0.0298355	BP	16	G. barbadense
GO:0044271	cellular nitrogen compound biosynthetic ...	2289	63	45.73	0.00338	0.0384367	BP	16	G. barbadense
GO:1901137	carbohydrate derivative biosynthetic pro...	244	12	4.87	0.00365	0.0409816	BP	16	G. barbadense
GO:0016071	mRNA metabolic process	33	4	0.66	0.00403	0.0446826	BP	16	G. barbadense
GO:0009579	thylakoid	111	32	3.13	8.9e-25	1.03685e-22	CC	16	G. barbadense
GO:0044436	thylakoid part	111	32	3.13	8.9e-25	1.03685e-22	CC	16	G. barbadense
GO:0034357	photosynthetic membrane	105	30	2.96	4.2e-23	3.262e-21	CC	16	G. barbadense
GO:0009521	photosystem	99	29	2.79	1.1e-22	6.4075e-21	CC	16	G. barbadense
GO:0098796	membrane protein complex	327	47	9.23	2.8e-22	1.3048e-20	CC	16	G. barbadense
GO:0032991	protein-containing complex	1267	82	35.76	6e-17	2.33e-15	CC	16	G. barbadense
GO:0009522	photosystem I	41	14	1.16	2e-12	6.65714e-11	CC	16	G. barbadense
GO:0016469	proton-transporting two-sector ATPase co...	94	18	2.65	6.4e-11	1.864e-09	CC	16	G. barbadense
GO:0009523	photosystem II	46	11	1.3	3.5e-08	8.155e-07	CC	16	G. barbadense
GO:0033177	proton-transporting two-sector ATPase co...	46	11	1.3	3.5e-08	8.155e-07	CC	16	G. barbadense
GO:0045263	proton-transporting ATP synthase complex...	21	8	0.59	4.9e-08	1.03791e-06	CC	16	G. barbadense
GO:0045259	proton-transporting ATP synthase complex	38	10	1.07	5.6e-08	1.08733e-06	CC	16	G. barbadense
GO:0009536	plastid	47	10	1.33	5e-07	8.96154e-06	CC	16	G. barbadense
GO:0044424	intracellular part	2481	97	70.03	2.7e-06	4.49357e-05	CC	16	G. barbadense
GO:0009539	photosystem II reaction center	6	4	0.17	8.7e-06	0.00013514	CC	16	G. barbadense
GO:0044425	membrane part	1223	57	34.52	1.7e-05	0.000247563	CC	16	G. barbadense
GO:0005622	intracellular	2903	105	81.94	3.4e-05	0.000466	CC	16	G. barbadense
GO:0005840	ribosome	481	29	13.58	5.4e-05	0.000686737	CC	16	G. barbadense
GO:1990904	ribonucleoprotein complex	507	30	14.31	5.6e-05	0.000686737	CC	16	G. barbadense
GO:0033178	proton-transporting two-sector ATPase co...	44	7	1.24	0.0002	0.00233	CC	16	G. barbadense
GO:0005623	cell	3058	106	86.31	0.0003	0.00317727	CC	16	G. barbadense
GO:0044464	cell part	3058	106	86.31	0.0003	0.00317727	CC	16	G. barbadense
GO:0044444	cytoplasmic part	931	43	26.28	0.00039	0.00395087	CC	16	G. barbadense
GO:0043228	non-membrane-bounded organelle	643	31	18.15	0.00161	0.0150052	CC	16	G. barbadense
GO:0043232	intracellular non-membrane-bounded organ...	643	31	18.15	0.00161	0.0150052	CC	16	G. barbadense
GO:0004298	threonine-type endopeptidase activity	39	9	0.54	2.2e-09	6.93e-07	MF	17	G. barbadense
GO:0070003	threonine-type peptidase activity	39	9	0.54	2.2e-09	6.93e-07	MF	17	G. barbadense
GO:0008121	ubiquinol-cytochrome-c reductase activit...	9	4	0.12	4.2e-06	0.0006615	MF	17	G. barbadense
GO:0016681	oxidoreductase activity, acting on diphe...	9	4	0.12	4.2e-06	0.0006615	MF	17	G. barbadense
GO:0015078	proton transmembrane transporter activit...	152	11	2.09	8.3e-06	0.0010458	MF	17	G. barbadense
GO:0016881	acid-amino acid ligase activity	113	9	1.56	2.6e-05	0.00273	MF	17	G. barbadense
GO:0004129	cytochrome-c oxidase activity	18	4	0.25	9.2e-05	0.005985	MF	17	G. barbadense
GO:0016675	oxidoreductase activity, acting on a hem...	18	4	0.25	9.2e-05	0.005985	MF	17	G. barbadense
GO:0016676	oxidoreductase activity, acting on a hem...	18	4	0.25	9.2e-05	0.005985	MF	17	G. barbadense
GO:0015077	monovalent inorganic cation transmembran...	198	11	2.73	9.5e-05	0.005985	MF	17	G. barbadense
GO:0016679	oxidoreductase activity, acting on diphe...	19	4	0.26	0.00012	0.00687273	MF	17	G. barbadense
GO:0015002	heme-copper terminal oxidase activity	20	4	0.28	0.00014	0.00735	MF	17	G. barbadense
GO:0022890	inorganic cation transmembrane transport...	269	12	3.7	0.00036	0.0174462	MF	17	G. barbadense
GO:0008324	cation transmembrane transporter activit...	284	12	3.91	0.00058	0.02562	MF	17	G. barbadense
GO:0016879	ligase activity, forming carbon-nitrogen...	171	9	2.35	0.00061	0.02562	MF	17	G. barbadense
GO:0010467	gene expression	2253	103	34.55	2.1e-30	1.8522e-27	BP	17	G. barbadense
GO:0044271	cellular nitrogen compound biosynthetic ...	2289	103	35.1	8.5e-30	3.7485e-27	BP	17	G. barbadense
GO:0034645	cellular macromolecule biosynthetic proc...	2333	102	35.78	2.6e-28	6.3945e-26	BP	17	G. barbadense
GO:0009059	macromolecule biosynthetic process	2336	102	35.82	2.9e-28	6.3945e-26	BP	17	G. barbadense
GO:0034641	cellular nitrogen compound metabolic pro...	2926	110	44.87	1.7e-25	2.9988e-23	BP	17	G. barbadense
GO:0044249	cellular biosynthetic process	2836	106	43.49	6.4e-24	9.408e-22	BP	17	G. barbadense
GO:1901576	organic substance biosynthetic process	2931	106	44.95	1e-22	1.26e-20	BP	17	G. barbadense
GO:0044267	cellular protein metabolic process	2550	97	39.1	1.1e-21	1.21275e-19	BP	17	G. barbadense
GO:0009058	biosynthetic process	3114	107	47.75	3.8e-21	3.724e-19	BP	17	G. barbadense
GO:0019538	protein metabolic process	2988	99	45.82	1.1e-17	9.702e-16	BP	17	G. barbadense
GO:1901564	organonitrogen compound metabolic proces...	3556	106	54.53	6.3e-16	5.05145e-14	BP	17	G. barbadense
GO:0044260	cellular macromolecule metabolic process	4378	118	67.14	4.3e-15	3.1605e-13	BP	17	G. barbadense
GO:0043170	macromolecule metabolic process	5021	121	77	1.2e-11	7.56e-10	BP	17	G. barbadense
GO:0006807	nitrogen compound metabolic process	5431	127	83.28	1.2e-11	7.56e-10	BP	17	G. barbadense
GO:0009987	cellular process	6807	145	104.38	2.4e-11	1.4112e-09	BP	17	G. barbadense
GO:0044237	cellular metabolic process	5724	130	87.78	4.4e-11	2.4255e-09	BP	17	G. barbadense
GO:0006605	protein targeting	28	7	0.43	1.6e-07	8.30118e-06	BP	17	G. barbadense
GO:0006414	translational elongation	40	7	0.61	2.2e-06	0.0001078	BP	17	G. barbadense
GO:0044238	primary metabolic process	6385	126	97.91	7.7e-06	0.000357442	BP	17	G. barbadense
GO:0071704	organic substance metabolic process	6565	128	100.67	1.2e-05	0.0005292	BP	17	G. barbadense
GO:0009057	macromolecule catabolic process	188	12	2.88	3.2e-05	0.00134217	BP	17	G. barbadense
GO:0006122	mitochondrial electron transport, ubiqui...	5	3	0.08	3.5e-05	0.00134217	BP	17	G. barbadense
GO:0042775	mitochondrial ATP synthesis coupled elec...	5	3	0.08	3.5e-05	0.00134217	BP	17	G. barbadense
GO:0007007	inner mitochondrial membrane organizatio...	6	3	0.09	6.9e-05	0.00209855	BP	17	G. barbadense
GO:0044743	protein transmembrane import into intrac...	6	3	0.09	6.9e-05	0.00209855	BP	17	G. barbadense
GO:0045039	protein import into mitochondrial inner ...	6	3	0.09	6.9e-05	0.00209855	BP	17	G. barbadense
GO:0065002	intracellular protein transmembrane tran...	6	3	0.09	6.9e-05	0.00209855	BP	17	G. barbadense
GO:0071806	protein transmembrane transport	6	3	0.09	6.9e-05	0.00209855	BP	17	G. barbadense
GO:1990542	mitochondrial transmembrane transport	6	3	0.09	6.9e-05	0.00209855	BP	17	G. barbadense
GO:0030163	protein catabolic process	151	10	2.32	0.00011	0.003234	BP	17	G. barbadense
GO:0044265	cellular macromolecule catabolic process	155	10	2.38	0.00013	0.00369871	BP	17	G. barbadense
GO:1901565	organonitrogen compound catabolic proces...	186	11	2.85	0.00014	0.00385875	BP	17	G. barbadense
GO:0015988	energy coupled proton transmembrane tran...	55	6	0.84	0.00019	0.00452919	BP	17	G. barbadense
GO:0015991	ATP hydrolysis coupled proton transport	55	6	0.84	0.00019	0.00452919	BP	17	G. barbadense
GO:0090662	ATP hydrolysis coupled transmembrane tra...	55	6	0.84	0.00019	0.00452919	BP	17	G. barbadense
GO:0099131	ATP hydrolysis coupled ion transmembrane...	55	6	0.84	0.00019	0.00452919	BP	17	G. barbadense
GO:0099132	ATP hydrolysis coupled cation transmembr...	55	6	0.84	0.00019	0.00452919	BP	17	G. barbadense
GO:0044257	cellular protein catabolic process	146	9	2.24	0.00041	0.00927231	BP	17	G. barbadense
GO:0051603	proteolysis involved in cellular protein...	146	9	2.24	0.00041	0.00927231	BP	17	G. barbadense
GO:0044248	cellular catabolic process	289	13	4.43	0.00051	0.0112455	BP	17	G. barbadense
[truncated: 192 more rows]
