# Supplementary material for: Domestication over Speciation in Allopolyploid Cotton Species: A Stronger Transcriptomic Pull
Source: Genes (Basel). 2023 Jun 20;14(6):1301. doi: 10.3390/genes14061301 (PMC10298526; doi:10.3390/genes14061301)
Supplement: Supplementary file 1 [file genes-14-01301-s001.zip › Supplementary Table S11.xlsx]

## Sheet: Sheet1
Supplementary Table S11. The number of homoeologs placed in different modules (maternal = ".A", paternal = ".D") without the opposite homoeolog or in the same module (".both") for (1) the metanetwork, (2,3) each individual species network, and (4) the consensus network. The overall homoeolog composition of each module is given as "%A homoeologs", and the proportion of the module genes that are re…
Meta-network for G. hirsutum and G. barbadense												G. hirsutum coexpression network												G. barbadense coexpression network												consensus network for G. hirsutum and G. barbadense
Module	A	D	both	%A homoeolog	% both	Bias	Bias P-value	A_obs	D_obs	A_exp	D_exp	Module	AD1.A	AD1.D	AD1.both	%A homoeolog	% both	Bias	Bias P-value	A_obs	D_obs	A_exp	D_exp	Module	AD2.A	AD2.D	AD2.both	%A homoeolog	% both	Bias	Bias P-value	A_obs	D_obs	A_exp	D_exp	Module	consensus.A	consensus.D	consensus.both	%A homoeolog	% both	Bias	Bias P-value	A_obs	D_obs	A_exp	D_exp
ME1	2565	2630	2906	0.497047	0.528028	-	0.502456	5471	5536	5506.18	5500.82	ME1	2361	2387	2650	0.498706	0.527468	-	0.766839	5011	5037	5025.86	5022.14	ME1	3213	3293	1821	0.496058	0.358888	-	0.374281	5034	5114	5078.75	5069.25	ME1	2710	2744	1843	0.49814	0.403282	-	0.771629	4553	4587	4566.87	4573.13
ME2	2625	2386	2968	0.510916	0.542249	A	0.025526	5593	5354	5476.16	5470.84	ME2	2451	2473	2091	0.498792	0.459258	-	0.790319	4542	4564	4554.69	4551.31	ME2	2060	2151	491	0.491238	0.189101	-	0.183426	2551	2642	2598.93	2594.07	ME2	1344	1320	780	0.502841	0.369318	-	0.679073	2124	2100	2110.56	2113.44
ME3	2062	2120	2062	0.496509	0.496509	-	0.496015	4124	4182	4155.02	4150.98	ME3	1557	1537	1001	0.501962	0.392857	-	0.799711	2558	2538	2548.94	2547.06	ME3	1423	1396	838	0.503003	0.372859	-	0.733909	2261	2234	2249.6	2245.4	ME3	1279	1333	503	0.492537	0.278054	-	0.391656	1782	1836	1807.76	1810.24
ME4	1583	1604	198	0.497069	0.110522	-	0.703967	1781	1802	1792.37	1790.63	ME4	1583	1572	954	0.501086	0.376852	-	0.897964	2537	2526	2532.44	2530.56	ME4	1418	1493	750	0.491499	0.340059	-	0.233475	2168	2243	2207.57	2203.43	ME4	1110	1176	396	0.489279	0.25731	-	0.249454	1506	1572	1537.95	1540.05
ME5	1387	1245	224	0.523052	0.145455	A	0.0113529	1611	1469	1540.75	1539.25	ME5	1158	1269	1106	0.488036	0.476827	-	0.097936	2264	2375	2320.36	2318.64	ME5	1322	1361	584	0.494936	0.303298	-	0.49235	1906	1945	1927.3	1923.7	ME5	768	791	273	0.494537	0.259382	-	0.63841	1041	1064	1051.78	1053.22
ME6	1096	1129	420	0.494617	0.274062	-	0.533268	1516	1549	1533.25	1531.75	ME6	696	622	748	0.513149	0.531628	-	0.169028	1444	1370	1407.52	1406.48	ME6	1018	1129	268	0.479314	0.199776	D	0.0284184	1286	1397	1342.76	1340.24	ME6	680	706	77	0.491558	0.1	-	0.524972	757	783	769.473	770.527
ME7	623	616	697	0.501329	0.529434	-	0.91127	1320	1313	1317.14	1315.86	ME7	754	803	328	0.488929	0.29643	-	0.289583	1082	1131	1106.91	1106.09	ME7	1044	964	166	0.517094	0.14188	-	0.107727	1210	1130	1171.1	1168.9	ME7	543	578	136	0.487437	0.195262	-	0.361646	679	714	696.024	696.976
ME8	699	735	260	0.490788	0.266121	-	0.403197	959	995	977.476	976.524	ME8	686	714	250	0.492632	0.263158	-	0.510209	936	964	950.352	949.648	ME8	1025	958	147	0.514712	0.129117	-	0.17402	1172	1105	1139.57	1137.43	ME8	412	412	105	0.5	0.203095	-	0.982453	517	517	516.646	517.354
ME9	910	777	85	0.53581	0.0915455	A	0.00217398	995	862	928.952	928.048	ME9	553	600	277	0.486233	0.324546	-	0.248958	830	877	853.816	853.184	ME9	900	931	182	0.492938	0.165831	-	0.480468	1082	1113	1098.53	1096.47	ME9	427	403	81	0.512097	0.163306	-	0.433308	508	484	495.661	496.339
ME10	368	442	293	0.473496	0.419771	D	0.0456349	661	735	698.34	697.66	ME10	608	486	255	0.53803	0.317955	A	0.00243456	863	741	802.297	801.703	ME10	660	749	164	0.474381	0.188831	D	0.0296688	824	913	869.313	867.687	ME10	342	352	88	0.494253	0.202299	-	0.749835	430	440	434.702	435.298
ME11	432	346	190	0.537133	0.328152	A	0.0120506	622	536	579.282	578.718	ME11	628	690	133	0.480429	0.167929	-	0.115823	761	823	792.293	791.707	ME11	511	557	149	0.483163	0.218155	-	0.20082	660	706	683.64	682.36	ME11	281	230	152	0.531288	0.373006	-	0.0709216	433	382	407.221	407.779
ME12	365	454	121	0.458058	0.228087	D	0.00599265	486	575	530.758	530.242	ME12	502	499	167	0.501124	0.250187	-	0.94533	669	666	667.747	667.253	ME12	500	499	149	0.500386	0.229761	-	0.995245	649	648	649.107	647.893	ME12	344	340	58	0.5025	0.145	-	0.872277	402	398	399.726	400.274
ME13	246	271	218	0.486884	0.457503	-	0.409452	464	489	476.732	476.268	ME13	595	607	66	0.495502	0.0989505	-	0.732289	661	673	667.247	666.753	ME13	590	501	74	0.535916	0.119451	A	0.0125784	664	575	620.08	618.92	ME13	333	360	26	0.481879	0.0697987	-	0.33178	359	386	372.245	372.755
ME14	290	347	101	0.466031	0.240763	D	0.0474837	391	448	419.704	419.296	ME14	388	421	174	0.485739	0.300778	-	0.325721	562	595	578.714	578.286	ME14	524	480	117	0.517771	0.189015	-	0.223385	641	597	619.58	618.42	ME14	305	311	57	0.49589	0.156164	-	0.838674	362	368	364.75	365.25
ME15	344	369	62	0.485066	0.148148	-	0.379829	406	431	418.704	418.296	ME15	376	400	53	0.486395	0.120181	-	0.412716	429	453	441.163	440.837	ME15	484	400	65	0.54142	0.128205	A	0.00910484	549	465	507.475	506.525	ME15	337	280	25	0.542729	0.0749625	A	0.0261004	362	305	333.272	333.728
ME16	331	310	75	0.513274	0.189633	-	0.46357	406	385	395.693	395.307	ME16	340	348	65	0.49511	0.158924	-	0.77158	405	413	409.152	408.848	ME16	439	246	147	0.59857	0.300306	A	8.30384e-10	586	393	489.958	489.042	ME16	292	270	27	0.517857	0.0876623	-	0.366323	319	297	307.789	308.211
ME17	239	233	152	0.503866	0.391753	-	0.840053	391	385	388.189	387.811	ME17	297	305	30	0.493958	0.0906344	-	0.748619	327	335	331.123	330.877	ME17	295	332	155	0.480256	0.330843	-	0.215937	450	487	468.939	468.061	ME17	265	250	50	0.512195	0.162602	-	0.53406	315	300	307.29	307.71
ME18	321	368	9	0.466761	0.0254597	-	0.074984	330	377	353.672	353.328	ME18	232	220	86	0.509615	0.275641	-	0.637547	318	306	312.116	311.884	ME18	423	447	28	0.487041	0.0604752	-	0.413822	451	475	463.434	462.566	ME18	115	157	165	0.465116	0.548173	-	0.0900734	280	322	300.794	301.206
ME19	266	306	63	0.471347	0.180516	-	0.12679	329	369	349.17	348.83	ME19	250	235	58	0.512479	0.193012	-	0.546654	308	293	300.611	300.389	ME19	369	426	35	0.467052	0.0809249	D	0.0493446	404	461	432.905	432.095	ME19	186	233	87	0.460371	0.293423	-	0.0556965	273	320	296.297	296.703
ME20	296	265	53	0.523238	0.158921	-	0.234931	349	318	333.662	333.338	ME20	248	251	16	0.497175	0.0602637	-	0.889667	264	267	265.598	265.402	ME20	329	313	93	0.509662	0.224638	-	0.596742	422	406	414.388	413.612	ME20	263	249	32	0.512153	0.111111	-	0.548673	295	281	287.803	288.197
ME21	191	227	100	0.470874	0.323625	-	0.144225	291	327	309.15	308.85	ME21	172	164	67	0.508511	0.285106	-	0.718113	239	231	235.087	234.913	ME21	302	251	75	0.536273	0.213371	-	0.0576076	377	326	351.829	351.171	ME21	261	259	22	0.501773	0.0780142	-	0.91998	283	281	281.807	282.193
ME22	222	244	25	0.478682	0.0968992	-	0.327306	247	269	258.126	257.874	ME22	175	203	22	0.466825	0.104265	-	0.170491	197	225	211.078	210.922	ME22	259	287	46	0.478056	0.144201	-	0.257557	305	333	319.299	318.701	ME22	267	227	33	0.535714	0.117857	-	0.087916	300	260	279.808	280.192
ME23	110	171	96	0.435518	0.40592	D	0.00487209	206	267	236.615	236.385	ME23	159	51	77	0.648352	0.423077	A	1.57057e-08	236	128	182.067	181.933	ME23	276	313	20	0.470588	0.063593	-	0.133932	296	333	314.795	314.205	ME23	237	226	37	0.510242	0.137803	-	0.623755	274	263	268.316	268.684
ME24	169	195	25	0.468599	0.120773	-	0.197838	194	220	207.101	206.899	ME24	148	143	32	0.507042	0.180282	-	0.796104	180	175	177.566	177.434	ME24	287	232	43	0.545455	0.142149	A	0.0268953	330	275	302.783	302.217	ME24	232	236	14	0.495968	0.0564516	-	0.869438	246	250	247.83	248.17
ME25	169	201	21	0.461165	0.101942	-	0.112647	190	222	206.1	205.9	ME25	208	60	32	0.722892	0.192771	A	0	240	92	166.061	165.939	ME25	236	215	48	0.519196	0.175503	-	0.381034	284	263	273.756	273.244	ME25	219	215	26	0.504115	0.106996	-	0.844201	245	241	242.834	243.166
ME26	139	136	65	0.503704	0.320988	-	0.889234	204	201	202.599	202.401	ME26	124	136	11	0.478723	0.0780142	-	0.471026	135	147	141.052	140.948	ME26	219	216	27	0.503067	0.110429	-	0.90848	246	243	244.729	244.271	ME26	233	191	28	0.54375	0.116667	-	0.0533577	261	219	239.836	240.164
ME27	106	111	31	0.491039	0.222222	-	0.758482	137	142	139.568	139.432	ME27	126	113	20	0.523297	0.143369	-	0.440054	146	133	139.552	139.448	ME27	180	208	50	0.471311	0.204918	-	0.19768	230	258	244.229	243.771	ME27	169	195	51	0.472103	0.218884	-	0.234179	220	246	232.841	233.159
ME28	74	61	53	0.526971	0.439834	-	0.406626	127	114	120.559	120.441	ME28	128	108	16	0.537313	0.119403	-	0.224126	144	124	134.05	133.95	ME28	182	226	28	0.452586	0.12069	D	0.0391295	210	254	232.217	231.783	ME28	207	182	30	0.52784	0.13363	-	0.232354	237	212	224.346	224.654
ME29	112	106	10	0.512605	0.0840336	-	0.702898	122	116	119.058	118.942	ME29	103	117	8	0.470339	0.0677966	-	0.359136	111	125	118.044	117.956	ME29	197	219	5	0.474178	0.0234742	-	0.277819	202	224	213.199	212.801	ME29	216	51	87	0.687075	0.394558	A	0	303	138	220.349	220.651
ME30	109	117	2	0.482609	0.0173913	-	0.592727	111	119	115.056	114.944	ME30	119	95	8	0.552174	0.0695652	-	0.11482	127	103	115.043	114.957	ME30	172	161	46	0.512941	0.216471	-	0.607061	218	207	212.699	212.301	ME30	196	189	13	0.508516	0.0632603	-	0.719482	209	202	205.359	205.641
ME31	96	102	9	0.486111	0.0833333	-	0.677847	105	111	108.053	107.947	ME31	58	52	58	0.513274	0.513274	-	0.693917	116	110	113.042	112.958	ME31	189	173	30	0.518957	0.14218	-	0.447476	219	203	211.198	210.802	ME31	156	166	43	0.487745	0.210784	-	0.630333	199	209	203.86	204.14
ME32	71	113	10	0.397059	0.0980392	D	0.00320311	81	123	102.05	101.95	ME32	79	74	36	0.511111	0.32	-	0.743081	115	110	112.542	112.458	ME32	177	159	28	0.522959	0.142857	-	0.373146	205	187	196.184	195.816	ME32	192	167	23	0.530864	0.11358	-	0.209107	215	190	202.361	202.639
ME33	79	76	22	0.507538	0.221106	-	0.83695	101	98	99.5484	99.4516	ME33	89	85	20	0.509346	0.186916	-	0.788688	109	105	107.04	106.96	ME33	153	166	34	0.483204	0.175711	-	0.496979	187	200	193.681	193.319	ME33	121	163	39	0.441989	0.21547	D	0.0282025	160	202	180.876	181.124
ME34	61	73	26	0.467742	0.27957	-	0.375336	87	99	93.0453	92.9547	ME34	51	61	46	0.47549	0.45098	-	0.480542	97	107	102.038	101.962	ME34	153	123	29	0.54491	0.173653	-	0.104288	182	152	167.156	166.844	ME34	159	181	8	0.469101	0.0449438	-	0.248872	167	189	177.878	178.122
ME35	39	54	44	0.458564	0.486188	-	0.262079	83	98	90.5441	90.4559	ME35	79	81	9	0.494382	0.101124	-	0.876941	88	90	89.033	88.967	ME35	157	158	8	0.498489	0.0483384	-	0.9426	165	166	165.655	165.345	ME35	75	127	73	0.425287	0.41954	D	0.00552469	148	200	173.881	174.119
ME36	87	66	13	0.558659	0.145251	-	0.118029	100	79	89.5436	89.4564	ME36	55	85	14	0.410714	0.166667	D	0.020376	69	99	84.0311	83.9689	ME36	147	127	24	0.531056	0.149068	-	0.272313	171	151	161.151	160.849	ME36	135	152	17	0.47352	0.105919	-	0.348968	152	169	160.39	160.61
ME37	70	57	25	0.536723	0.282486	-	0.331716	95	82	88.5431	88.4569	ME37	85	67	7	0.554217	0.0843373	-	0.163832	92	74	83.0307	82.9693	ME37	137	133	23	0.506329	0.14557	-	0.83494	160	156	158.148	157.852	ME37	156	159	2	0.495298	0.0125392	-	0.876229	158	161	159.391	159.609
ME38	81	69	8	0.536145	0.0963855	-	0.35491	89	77	83.0404	82.9596	ME38	73	74	7	0.496894	0.0869565	-	0.933445	80	81	80.5298	80.4702	ME38	138	131	21	0.511254	0.135048	-	0.703635	159	152	155.646	155.354	ME38	135	144	15	0.485437	0.0970874	-	0.617097	150	159	154.394	154.606
ME39	89	63	4	0.58125	0.05	A	0.0404306	93	67	80.0389	79.9611	ME39	70	79	6	0.47205	0.0745342	-	0.475227	76	85	80.5298	80.4702	ME39	115	122	29	0.488136	0.19661	-	0.671828	144	151	147.638	147.362	ME39	135	120	27	0.524272	0.174757	-	0.38685	162	147	154.394	154.606
ME40	62	59	14	0.510067	0.187919	-	0.810464	76	73	74.5363	74.4637	ME40	62	69	10	0.476821	0.13245	-	0.56583	72	79	75.528	75.472	ME40	142	115	18	0.546075	0.122867	-	0.118446	160	133	146.637	146.363	ME40	164	97	21	0.610561	0.138614	A	0.000112944	185	118	151.396	151.604
ME41	60	62	8	0.492754	0.115942	-	0.860317	68	70	69.0336	68.9664	ME41	65	69	8	0.486667	0.106667	-	0.740542	73	77	75.0278	74.9722	ME41	171	100	7	0.624561	0.0491228	A	2.79115e-05	178	107	142.633	142.367	ME41	103	91	53	0.52	0.353333	-	0.481017	156	144	149.897	150.103
ME42	51	66	9	0.444444	0.133333	-	0.194751	60	75	67.5329	67.4671	ME42	75	70	2	0.516779	0.0268456	-	0.685408	77	72	74.5276	74.4724	ME42	72	87	45	0.46988	0.361446	-	0.334362	117	132	124.617	124.383	ME42	92	115	43	0.460751	0.293515	-	0.182871	135	158	146.4	146.6
ME43	59	52	11	0.526316	0.165414	-	0.547599	70	63	66.5324	66.4676	ME43	62	68	5	0.478571	0.0714286	-	0.609018	67	73	70.0259	69.9741	ME43	101	97	22	0.508264	0.181818	-	0.808345	123	119	121.113	120.887	ME43	141	133	7	0.513889	0.0486111	-	0.629087	148	140	143.902	144.098
ME44	77	48	1	0.614173	0.015748	A	0.0102332	78	49	63.5309	63.4691	ME44	57	69	5	0.455882	0.0735294	-	0.301458	62	74	68.0252	67.9748	ME44	91	110	19	0.460251	0.158996	-	0.213689	110	129	119.612	119.388	ME44	133	128	11	0.508834	0.0777385	-	0.75753	144	139	141.403	141.597
ME45	62	56	2	0.52459	0.0327869	-	0.590689	64	58	61.0297	60.9703	ME45	64	63	3	0.503759	0.0451128	-	0.934298	67	66	66.5246	66.4754	ME45	103	100	17	0.506329	0.14346	-	0.856796	120	117	118.611	118.389	ME45	129	121	13	0.514493	0.0942029	-	0.622079	142	134	137.906	138.094
ME46	64	49	3	0.563025	0.0504202	-	0.170769	67	52	59.529	59.471	ME46	55	69	4	0.44697	0.0606061	-	0.221405	59	73	66.0244	65.9756	ME46	79	116	19	0.420601	0.16309	D	0.0147587	98	135	116.609	116.391	ME46	114	98	6	0.535714	0.0535714	-	0.280462	120	104	111.923	112.077
ME47	41	58	4	0.420561	0.0747664	-	0.0992525	45	62	53.526	53.474	ME47	63	57	6	0.522727	0.0909091	-	0.604474	69	63	66.0244	65.9756	ME47	97	96	14	0.502262	0.126697	-	0.957457	111	110	110.603	110.397	ME47	97	90	18	0.515695	0.161435	-	0.631961	115	108	111.424	111.576
ME48	41	44	9	0.485437	0.174757	-	0.763765	50	53	51.5251	51.4749	ME48	34	31	33	0.51145	0.503817	-	0.796506	67	64	65.5243	65.4757	ME48	97	77	20	0.546729	0.186916	-	0.175905	117	97	107.1	106.9	ME48	105	87	14	0.540909	0.127273	-	0.221063	119	101	109.925	110.075
ME49	54	38	5	0.578431	0.0980392	-	0.114263	59	43	51.0248	50.9752	ME49	54	66	4	0.453125	0.0625	-	0.286943	58	70	64.0237	63.9763	ME49	106	81	4	0.564103	0.0410256	-	0.0755336	110	85	97.5913	97.4087	ME49	83	89	23	0.486239	0.211009	-	0.691904	106	112	108.925	109.075
ME50	81	5	4	0.904255	0.0851064	A	0	85	9	47.0229	46.9771	ME50	39	36	26	0.511811	0.409449	-	0.793297	65	62	63.5235	63.4765	ME50	83	78	9	0.513966	0.100559	-	0.717959	92	87	89.5838	89.4162	ME50	92	116	3	0.443925	0.0280374	-	0.102975	95	119	106.927	107.073
ME51	22	22	22	0.5	0.5	-	0.996356	44	44	44.0214	43.9786	ME51	43	63	7	0.416667	0.116667	-	0.0672798	50	70	60.0222	59.9778	ME51	70	76	9	0.481707	0.109756	-	0.630862	79	85	82.0768	81.9232	ME51	99	102	5	0.492891	0.0473934	-	0.844146	104	107	105.428	105.572
ME52	29	33	13	0.477273	0.295455	-	0.666491	42	46	44.0214	43.9786	ME52	46	60	4	0.438596	0.0701754	-	0.188451	50	64	57.0211	56.9789	ME52	58	74	14	0.45	0.175	-	0.201688	72	88	80.0749	79.9251	ME52	94	111	2	0.45933	0.0191388	-	0.243604	96	113	104.429	104.571
ME53	46	38	2	0.545455	0.0454545	-	0.396307	48	40	44.0214	43.9786	ME53	42	44	10	0.490566	0.188679	-	0.842989	52	54	53.0196	52.9804	ME53	73	71	1	0.506849	0.0136986	-	0.877448	74	72	73.0684	72.9316	ME53	99	99	2	0.5	0.019802	-	0.992244	101	101	100.931	101.069
ME54	27	28	9	0.493151	0.246575	-	0.903532	36	37	36.5178	36.4822	ME54	47	46	5	0.504854	0.0970874	-	0.924495	52	51	51.5191	51.4809	ME54	68	58	6	0.536232	0.0869565	-	0.400765	74	64	69.0646	68.9354	ME54	84	105	6	0.447761	0.0597015	-	0.141148	90	111	100.431	100.569
ME55	23	33	0	0.410714	0	-	0.180262	23	33	28.0136	27.9864	ME55	44	48	3	0.479592	0.0612245	-	0.683473	47	51	49.0182	48.9818	ME55	44	45	9	0.495327	0.168224	-	0.915296	53	54	53.5501	53.4499	ME55	101	75	11	0.565657	0.111111	-	0.0632593	112	86	98.9323	99.0677
ME56	15	21	9	0.444444	0.333333	-	0.412174	24	30	27.0131	26.9869	ME56	46	31	7	0.582418	0.153846	-	0.116673	53	38	45.5169	45.4831	ME56	48	41	0	0.539326	0	-	0.463458	48	41	44.5417	44.4583	ME56	84	83	15	0.502538	0.152284	-	0.935563	99	98	98.4326	98.5674
ME57	21	27	2	0.442308	0.0769231	-	0.403402	23	29	26.0127	25.9873	ME57	41	42	3	0.494382	0.0674157	-	0.91281	44	45	44.5165	44.4835	61934	23726	23668	7270									ME57	91	73	15	0.546392	0.154639	-	0.192967	106	88	96.9337	97.0663
ME58	19	11	4	0.605263	0.210526	-	0.195399	23	15	19.0093	18.9907	ME58	45	33	5	0.568182	0.113636	-	0.202051	50	38	44.0163	43.9837													ME58	69	106	6	0.40107	0.0641711	D	0.00701029	75	112	93.436	93.564
63675	19976	19945	11877									ME59	31	45	4	0.416667	0.0952381	-	0.125789	35	49	42.0156	41.9844					min	0							ME59	82	90	7	0.478495	0.0752688	-	0.563764	89	97	92.9364	93.0636
				min	0							ME60	46	33	1	0.580247	0.0246914	-	0.149553	47	34	40.515	40.485					max	0.372859							ME60	104	75	2	0.579235	0.0218579	A	0.0313191	106	77	91.4374	91.5626
				max	0.542249							ME61	29	41	4	0.423077	0.102564	-	0.173197	33	45	39.0144	38.9856					mean	0.164016							ME61	72	83	13	0.469613	0.143646	-	0.418848	85	96	90.4381	90.5619
				mean	0.215019							ME62	31	35	5	0.473684	0.131579	-	0.644038	36	40	38.0141	37.9859					median	0.154032							ME62	96	78	3	0.55	0.0333333	-	0.176754	99	81	89.9384	90.0616
				median	0.177637							ME63	35	30	5	0.533333	0.133333	-	0.565872	40	35	37.5139	37.4861													ME63	90	78	4	0.534091	0.0454545	-	0.360923	94	82	87.9398	88.0602
												ME64	32	36	3	0.472973	0.0810811	-	0.639658	35	39	37.0137	36.9863													ME64	88	83	2	0.514286	0.0228571	-	0.698747	90	85	87.4402	87.5598
												ME65	32	35	2	0.478873	0.056338	-	0.719478	34	37	35.5132	35.4868													ME65	71	93	3	0.435294	0.0352941	-	0.093268	74	96	84.9419	85.0581
												ME66	32	34	2	0.485714	0.0571429	-	0.808668	34	36	35.013	34.987													ME66	76	90	0	0.457831	0	-	0.281124	76	90	82.9432	83.0568
												ME67	27	31	3	0.46875	0.09375	-	0.61499	30	34	32.0119	31.9881													ME67	82	72	2	0.531646	0.0253165	-	0.421307	84	74	78.946	79.054
												ME68	36	23	1	0.606557	0.0327869	-	0.0965958	37	24	30.5113	30.4887													ME68	70	57	15	0.541401	0.191083	-	0.295522	85	72	78.4463	78.5537
												ME69	26	27	2	0.491228	0.0701754	-	0.892414	28	29	28.5106	28.4894													ME69	71	72	7	0.496815	0.089172	-	0.943208	78	79	78.4463	78.5537
												ME70	22	30	2	0.428571	0.0714286	-	0.283802	24	32	28.0104	27.9896													ME70	76	68	5	0.525974	0.0649351	-	0.513662	81	73	76.9473	77.0527
												ME71	29	25	1	0.535714	0.0357143	-	0.594899	30	26	28.0104	27.9896													ME71	66	77	4	0.463576	0.0529801	-	0.375207	70	81	75.4484	75.5516
												ME72	28	26	0	0.518519	0	-	0.787589	28	26	27.01	26.99													ME72	77	73	0	0.513333	0	-	0.737643	77	73	74.9487	75.0513
												ME73	13	16	7	0.465116	0.325581	-	0.64557	20	23	21.508	21.492													ME73	72	70	4	0.506667	0.0533333	-	0.863692	76	74	74.9487	75.0513
												ME74	22	19	0	0.536585	0	-	0.641109	22	19	20.5076	20.4924													ME74	52	46	25	0.52027	0.337838	-	0.616007	77	71	73.9494	74.0506
												ME75	20	12	2	0.611111	0.111111	-	0.183153	22	14	18.0067	17.9933													ME75	64	72	3	0.471831	0.0422535	-	0.507206	67	75	70.9514	71.0486
												ME76	18	15	0	0.545455	0	-	0.60299	18	15	16.5061	16.4939													ME76	64	72	3	0.471831	0.0422535	-	0.507206	67	75	70.9514	71.0486
												62087	19857	19834	11198																					ME77	58	65	9	0.475177	0.12766	-	0.560981	67	74	70.4518	70.5482
																min	0																			ME78	68	63	4	0.517986	0.057554	-	0.665626	72	67	69.4525	69.5475
																max	0.531628																			ME79	58	61	9	0.489051	0.131387	-	0.803901	67	70	68.4531	68.5469
																mean	0.173769																			ME80	65	69	1	0.485294	0.0147059	-	0.737609	66	70	67.9535	68.0465
																median	0.112374																			ME81	62	71	1	0.466667	0.0148148	-	0.44329	63	72	67.4538	67.5462
																																				ME82	63	61	5	0.507463	0.0746269	-	0.85661	68	66	66.9542	67.0458
																																				ME83	54	63	8	0.466165	0.120301	-	0.439812	62	71	66.4545	66.5455
																																				ME84	44	85	2	0.345865	0.0300752	D	0.000389255	46	87	66.4545	66.5455
																																				ME85	64	63	3	0.503759	0.0451128	-	0.924633	67	66	66.4545	66.5455
																																				ME86	60	66	3	0.477273	0.0454545	-	0.60699	63	69	65.9549	66.0451
																																				ME87	59	62	5	0.48855	0.0763359	-	0.799277	64	67	65.4552	65.5448
																																				ME88	62	63	3	0.496183	0.0458015	-	0.936602	65	66	65.4552	65.5448
																																				ME89	72	56	0	0.5625	0	-	0.15504	72	56	63.9562	64.0438
																																				ME90	37	49	21	0.453125	0.328125	-	0.292377	58	70	63.9562	64.0438
																																				ME91	43	41	20	0.508065	0.322581	-	0.851487	63	61	61.9576	62.0424
																																				ME92	61	60	1	0.504065	0.0162602	-	0.922129	62	61	61.4579	61.5421
																																				ME93	55	47	9	0.533333	0.15	-	0.460642	64	56	59.959	60.041
																																				ME94	59	48	3	0.548673	0.0530973	-	0.297382	62	51	56.4614	56.5386
																																				ME95	47	52	7	0.477876	0.123894	-	0.6433	54	59	56.4614	56.5386
																																				ME96	33	26	25	0.53211	0.458716	-	0.498013	58	51	54.4627	54.5373
																																				ME97	43	49	5	0.470588	0.0980392	-	0.557082	48	54	50.9651	51.0349
																																				ME98	38	62	1	0.382353	0.0196078	D	0.0178147	39	63	50.9651	51.0349
																																				ME99	31	29	21	0.509804	0.411765	-	0.837621	52	50	50.9651	51.0349
																																				ME100	35	53	6	0.41	0.12	-	0.0729472	41	59	49.9658	50.0342
																																				ME101	39	43	8	0.479592	0.163265	-	0.691154	47	51	48.9665	49.0335
																																				ME102	46	49	1	0.484536	0.0206186	-	0.765804	47	50	48.4668	48.5332
																																				ME103	22	30	22	0.458333	0.458333	-	0.418058	44	52	47.9672	48.0328
																																				ME104	35	48	3	0.426966	0.0674157	-	0.170205	38	51	44.4696	44.5304
																																				ME105	42	33	6	0.551724	0.137931	-	0.331408	48	39	43.4702	43.5298
																																				ME106	41	42	2	0.494253	0.045977	-	0.919684	43	44	43.4702	43.5298
																																				ME107	46	36	2	0.55814	0.0465116	-	0.278067	48	38	42.9706	43.0294
																																				ME108	44	40	1	0.523256	0.0232558	-	0.661622	45	41	42.9706	43.0294
																																				ME109	48	32	2	0.595238	0.047619	-	0.0797717	50	34	41.9713	42.0287
																																				ME110	39	37	4	0.511905	0.0952381	-	0.822379	43	41	41.9713	42.0287
																																				ME111	32	45	3	0.421687	0.0722892	-	0.155403	35	48	41.4716	41.5284
																																				ME112	37	27	9	0.560976	0.219512	-	0.26678	46	36	40.972	41.028
																																				ME113	33	46	1	0.419753	0.0246914	-	0.150352	34	47	40.4723	40.5277
																																				ME114	34	28	9	0.5375	0.225	-	0.498445	43	37	39.9726	40.0274
																																				ME115	33	41	2	0.448718	0.0512821	-	0.368237	35	43	38.9733	39.0267
																																				ME116	16	33	14	0.38961	0.363636	-	0.0534425	30	47	38.4737	38.5263
																																				ME117	42	32	1	0.565789	0.0263158	-	0.248893	43	33	37.974	38.026
																																				ME118	30	40	3	0.434211	0.0789474	-	0.253822	33	43	37.974	38.026
																																				ME119	31	44	0	0.413333	0	-	0.134865	31	44	37.4744	37.5256
																																				ME120	33	38	1	0.465753	0.0273973	-	0.562345	34	39	36.475	36.525
																																				ME121	32	38	1	0.458333	0.0277778	-	0.483114	33	39	35.9754	36.0246
																																				ME122	36	35	0	0.507042	0	-	0.900966	36	35	35.4757	35.5243
																																				ME123	33	34	2	0.492958	0.056338	-	0.910098	35	36	35.4757	35.5243
																																				ME124	30	33	3	0.478261	0.0869565	-	0.722233	33	36	34.4764	34.5236
																																				ME125	39	30	0	0.565217	0	-	0.276086	39	30	34.4764	34.5236
																																				ME126	20	12	18	0.558824	0.529412	-	0.329172	38	30	33.9767	34.0233
																																				ME127	19	29	10	0.426471	0.294118	-	0.227417	29	39	33.9767	34.0233
																																				ME128	33	28	2	0.538462	0.0615385	-	0.531519	35	30	32.4778	32.5222
																																				ME129	22	12	14	0.580645	0.451613	-	0.202172	36	26	30.9788	31.0212
																																				ME130	29	24	4	0.540984	0.131148	-	0.518586	33	28	30.4791	30.5209
																																				ME131	30	30	0	0.5	0	-	0.995773	30	30	29.9795	30.0205
																																				ME132	32	22	3	0.583333	0.1	-	0.194875	35	25	29.9795	30.0205
																																				ME133	22	35	1	0.389831	0.0338983	-	0.0915644	23	36	29.4798	29.5202
																																				ME134	27	21	4	0.553571	0.142857	-	0.419723	31	25	27.9808	28.0192
																																				ME135	38	10	4	0.75	0.142857	A	0.000179121	42	14	27.9808	28.0192
																																				ME136	23	26	3	0.472727	0.109091	-	0.689564	26	29	27.4812	27.5188
																																				ME137	27	14	6	0.622642	0.226415	-	0.0733467	33	20	26.4819	26.5181
																																				ME138	26	25	1	0.509434	0.0377358	-	0.886811	27	26	26.4819	26.5181
																																				ME139	27	22	2	0.54717	0.0754717	-	0.489074	29	24	26.4819	26.5181
																																				ME140	26	18	4	0.576923	0.153846	-	0.265136	30	22	25.9822	26.0178
																																				ME141	29	22	0	0.568627	0	-	0.324584	29	22	25.4826	25.5174
																																				ME142	19	16	7	0.530612	0.285714	-	0.664754	26	23	24.4832	24.5168
																																				ME143	19	27	1	0.416667	0.0416667	-	0.25016	20	28	23.9836	24.0164
																																				ME144	21	24	1	0.468085	0.0425532	-	0.665083	22	25	23.4839	23.5161
																																				ME145	23	21	1	0.521739	0.0434783	-	0.764541	24	22	22.9843	23.0157
																																				ME146	19	25	1	0.434783	0.0434783	-	0.378852	20	26	22.9843	23.0157
																																				ME147	16	12	8	0.545455	0.363636	-	0.543479	24	20	21.985	22.015
																																				ME148	23	20	0	0.534884	0	-	0.644095	23	20	21.4853	21.5147
																																				ME149	18	21	2	0.465116	0.0930233	-	0.650541	20	23	21.4853	21.5147
																																				ME150	19	22	1	0.465116	0.0465116	-	0.650541	20	23	21.4853	21.5147
																																				ME151	17	23	0	0.425	0	-	0.344987	17	23	19.9863	20.0137
																																				ME152	20	20	0	0.5	0	-	0.996548	20	20	19.9863	20.0137
																																				ME153	9	28	1	0.25641	0.0512821	D	0.00238024	10	29	19.4867	19.5133
																																				ME154	20	16	1	0.552632	0.0526316	-	0.51369	21	17	18.987	19.013
																																				ME155	16	19	1	0.459459	0.0540541	-	0.624816	17	20	18.4873	18.5127
																																				ME156	15	17	2	0.472222	0.111111	-	0.741982	17	19	17.9877	18.0123
																																				ME157	16	12	4	0.555556	0.222222	-	0.502367	20	16	17.9877	18.0123
																																				ME158	16	14	3	0.527778	0.166667	-	0.735787	19	17	17.9877	18.0123
																																				ME159	10	18	3	0.382353	0.176471	-	0.171312	13	21	16.9884	17.0116
																																				ME160	14	17	1	0.454545	0.0606061	-	0.604246	15	18	16.4887	16.5113
																																				ME161	13	17	1	0.4375	0.0625	-	0.481908	14	18	15.9891	16.0109
																																				ME162	12	18	1	0.40625	0.0625	-	0.290607	13	19	15.9891	16.0109
																																				ME163	12	19	0	0.387097	0	-	0.21005	12	19	15.4894	15.5106
																																				ME164	11	10	5	0.516129	0.322581	-	0.854474	16	15	15.4894	15.5106
																																				ME165	15	13	1	0.533333	0.0666667	-	0.712206	16	14	14.9897	15.0103
																																				57019	22171	22210	6319	min	0
																																								max	0.548173
																																								mean	0.126521
																																								median	0.0789474
