# Supplementary material for: Domestication over Speciation in Allopolyploid Cotton Species: A Stronger Transcriptomic Pull
Source: Genes (Basel). 2023 Jun 20;14(6):1301. doi: 10.3390/genes14061301 (PMC10298526; doi:10.3390/genes14061301)
Supplement: Supplementary file 1 [file genes-14-01301-s001.zip › Supplementary Table S12.xlsx]

## Sheet: Sheet1
Supplementary Table S12. Module preservation tests between G. hirsutum (AD1) and G. barbadense (AD2). For each network (AD1 and AD2), the module significance with domestication and/or development is noted, as is the module annotation.
module	moduleSize	medianRank	Zsummary	Preservation	AD1 term	AD1 annotation	AD2 term	AD2 annotation
ME3	1000	3	56.0618	strong	dev	BP: regulation of transcription; microtubule-based process/movement MF: nucleic acid binding; cytoskeletal/microtubule motor activity	dom, dev	BP: polysaccharide/carbohydrate metabolic process and/or regulation of thereof
ME16	979	8	44.6178	strong	dom, dev	BP: gas exchange
ME20	828	4	43.0524	strong	dom	none	dom, dev	BP: DNA metabolic process; microtubule-based movement or process; MF: nucleic acid binding; cytoskeletal/microtubule motor activity
ME17	937	5	39.5011	strong	dom	none
ME42	249	2	35.2416	strong
ME43	242	2	32.3181	strong
ME5	1000	11	29.437	strong	dom, dev	BP: nitrogen compound metabolic process; MF: nucleoside binding; protein transmembrane transporter activity	dev	BP: carboxylic acid/small molecular metabolic process; organic substance biosynthesis process MF: lyase and transferase activity
ME6	1000	13	28.9806	strong	dom, dev	BP: tRNA/ncRNA metabolic process; translation; MF: nucleotide/nucleoside binding	dom, dev	MF: cyclic compound binding
ME19	865	11	26.8089	strong			dev	none
ME21	703	11	23.6749	strong	dom	BP: aminoglycan metabolic process MF: chitinase/oxidoreductase activity
ME41	285	6	23.1629	strong	dom	none	dom, dev	none
ME1	1000	17	19.5462	strong	dev	BP: protein glycosylation; transport; glycoprotein or carbohydrate metabolic process MF: acetylglucosaminyltransferase/glycosyltransferase/hexosyltransferase activity	dom, dev	BP: DNA metabolic process; cellular localization; MF: purine ribonucleos(t)ide binding; catalytic activity, possibly hydrolase
ME10	1000	19	17.1546	strong	dev	BP: DNA/nitrogren compound/primary metabolic process MF: nucleic acid/protein binding; helicase/nuclease activity	dev	BP: translation; amide metabolic process; organonitrogen compound biosynthetic process MF: structural constituent of ribosome; structural molecule activity
ME4	1000	16	16.5236	strong	dom, dev	BP: regulation of transcription/biosynthetic process; MF: nucleic acid/DNA/protein binding	dom, dev	MF: actin binding; cytoskeletal protein binding
ME7	1000	18	16.3659	strong	dom, dev	BP: protein modification and/or transcription-related; MF: nucleic acid binding/protein kinase activity
ME39	295	12	15.9039	strong
ME9	1000	20	13.1213	strong	dev	BP: regulation of biological/metabolic process MF: oxidoreductase activity
ME53	146	8	12.2045	strong			dom, dev	BP: macromolecule localization/peptide transport
ME49	195	10	10.9034	strong	dev	none	dom, dev	none
ME35	331	21	8.61539	weak			dom	none
ME2	1000	25	7.87824	weak	dom, dev	BP: lipid metabolism; protein modification; carboxylic acid biosynthesis; MF: cytoskeletal motor activity
ME25	547	26	7.80328	weak
ME8	1000	26	7.56482	weak	dev	BP: protein phosphorylation/modification MF: fatty acid synthase activity; polygalacturonase/protein kinase activity
ME40	293	23	5.95835	weak			dom, dev	none
ME55	107	19	5.12278	weak			dev	none
ME18	926	28	4.51162	weak
ME14	1000	29	4.27017	weak	dom	BP: cellular localization; various metabolic processes (pyruvate/citrate/xenobiotic/polysaccharide) MF: lipid binding;oxidoreductase activity
ME56	89	22	2.92947	weak	dev	none	dom	none
ME26	489	37	2.07418	weak
ME11	1000	31	1.642	no	dom, dev	none
ME23	629	33	0.98024	no
ME34	334	39	0.956727	no	dom, dev	BP: DNA-templated transcription, RNA/other metabolic process; MF: transcription regulator activity
ME29	426	44	0.36461	no	dom	none	dom	none
ME44	239	42	0.264679	no
ME48	214	39	0.254288	no	dom	BP: ribose phosphate metabolic process; possibly photosynthesis: MF: fructose-bisphosphate activity; aldehyde-lyase activity
ME12	1000	36	0.145946	no	dom	BP: translational initiation; autophagy; vacuole organization; MF: fatty acid binding; nucleoside binding
ME37	316	43	0.060466	no	dev	none
ME32	392	40	-0.0490764	no	dom, dev	BP: copper ion binding
ME30	425	45	-0.17289	no
ME27	488	45	-0.179847	no	dev	none
ME33	387	40	-0.181568	no	dom, dev	BP: cellular localization; peptide transport
ME54	138	48	-0.397768	no
ME28	464	52	-0.445071	no
ME15	1000	42	-0.610636	no	dom	none
ME47	221	48	-0.623648	no
ME51	164	36	-0.765221	no	dom, dev	BP/MF: copper ion transmembrane transport
ME46	233	41	-0.847218	no
ME45	237	49	-0.908136	no
ME38	311	48	-0.935357	no
ME24	605	44	-0.941705	no	dom	BP: Ras protein signal transduction; regulation of cell communication; MF: binding
ME52	160	51	-1.03688	no
ME22	638	51	-1.04476	no
ME36	322	46	-1.78103	no
ME31	422	48	-1.83537	no
ME50	179	44	-1.85482	no	dom, dev	none
ME13	1000	37	-2.307	no	dom	none
